# Supplementary material for: Pathogen recognition in compatible plant-microbe interactions
Source: PubMed Central journal article supplement (PMC5526865; doi:10.1038/s41598-017-04792-5), 2017-07-25
Supplement: 41598_2017_4792_MOESM1_ESM.pdf [file 41598_2017_4792_MOESM1_ESM.pdf]

# Supplementary Materials

## Pathogen recognition in compatible plant-microbe interactions

---

Fabio Rezzonico<sup>1</sup>, Oliver Rupp<sup>2</sup>, Johannes Fahrenttrapp<sup>3\*</sup>

<sup>1</sup> Research group Environmental Genomics and Systems Biology, Zurich University of Applied Sciences, Wädenswil, Switzerland

<sup>2</sup> Bioinformatics and Systems Biology, University of Giessen, Giessen, Germany

<sup>3</sup> Research Group for Viticulture, Zurich University of Applied Sciences, Wädenswil, Switzerland

\* Corresponding author: johannes.fahrenttrapp@zhaw.ch

### Abstract

Microbial infections in plant leaves remain a major challenge in agriculture. Hence an understanding of disease mechanisms at the molecular level is of paramount importance for identifying possible intervention points for their control. Whole-transcriptome changes during early disease stages in susceptible plant species are less well-documented than those of resistant ones. This study focuses on the differential transcriptional changes at 24 hours post inoculation (hpi) in tomato leaflets affected by three pathogens: (1) *Phytophthora infestans*, (2) *Botrytis cinerea*, and (3) *Oidium neolycopersici*. Grey mould (*B. cinerea*) was the disease that had progressed the most by 24 hpi, both in terms of visible symptoms as well as differential gene expression. By means of RNA-seq, we identified 50 differentially expressed tomato genes induced by *B. cinerea* infection and 18 by *P. infestans* infection at 24 hpi. Additionally, a set of 63 genes were differentially expressed during all three diseases when compared by a Bayesian approach to their respective mock infections. And Gene expression patterns were found to also depend on the inoculation technique. These findings suggest a specific and distinct transcriptional response in plant leaf tissue in reaction to *B. cinerea* and *P. infestans* invasion at 24 hpi, indicating that plants may recognize the attacking pathogen.

Please navigate the supplemental material using provided bookmarks.

All tables can be provided as .xlsx. Please contact the corresponding author.

## Supplementary Figure S1

Correlation of RNA-seq expression to qPCR of *B. cinerea* infected leaf samples at 24 hpi of genes summarized in Table S1.

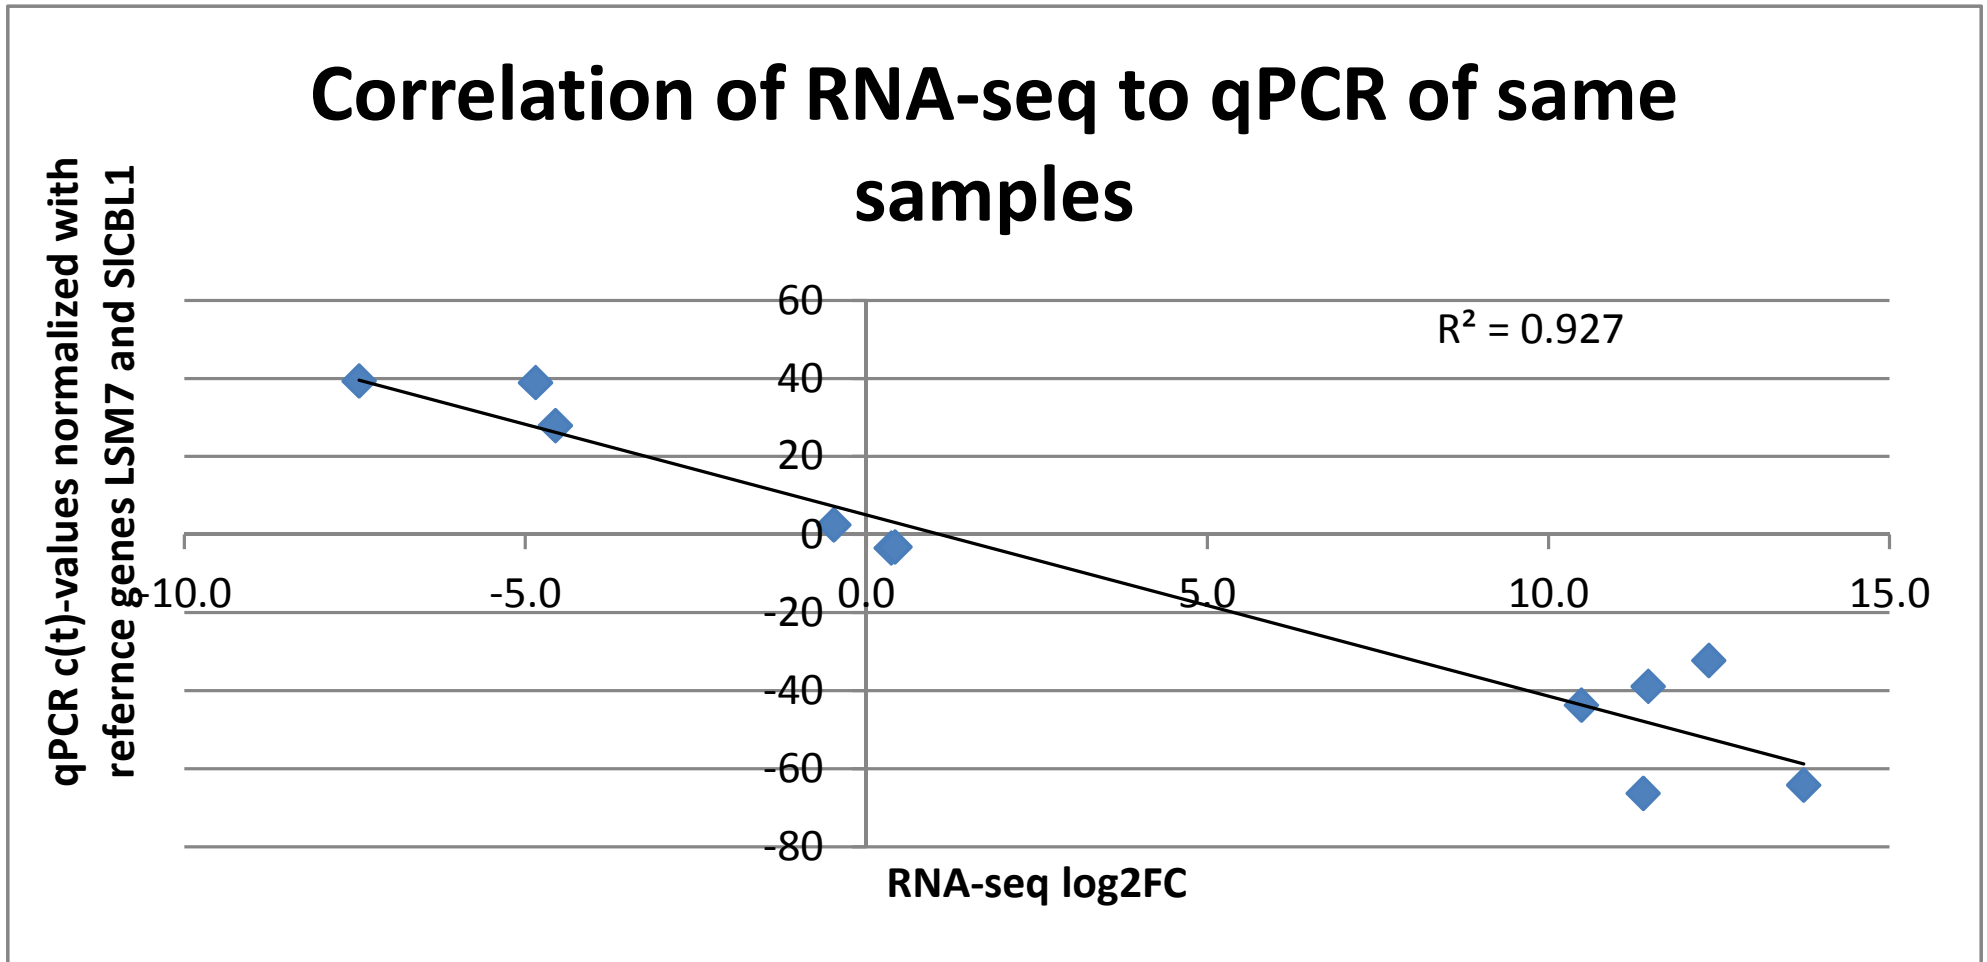

## Supplementary Figure S2

Time course experiment. qPCR measured differential gene expression during *B. cinerea* disease development in *S. lycopersicum* leaflets in 3 hour intervals from 0-24 hpi and at 48 hpi.

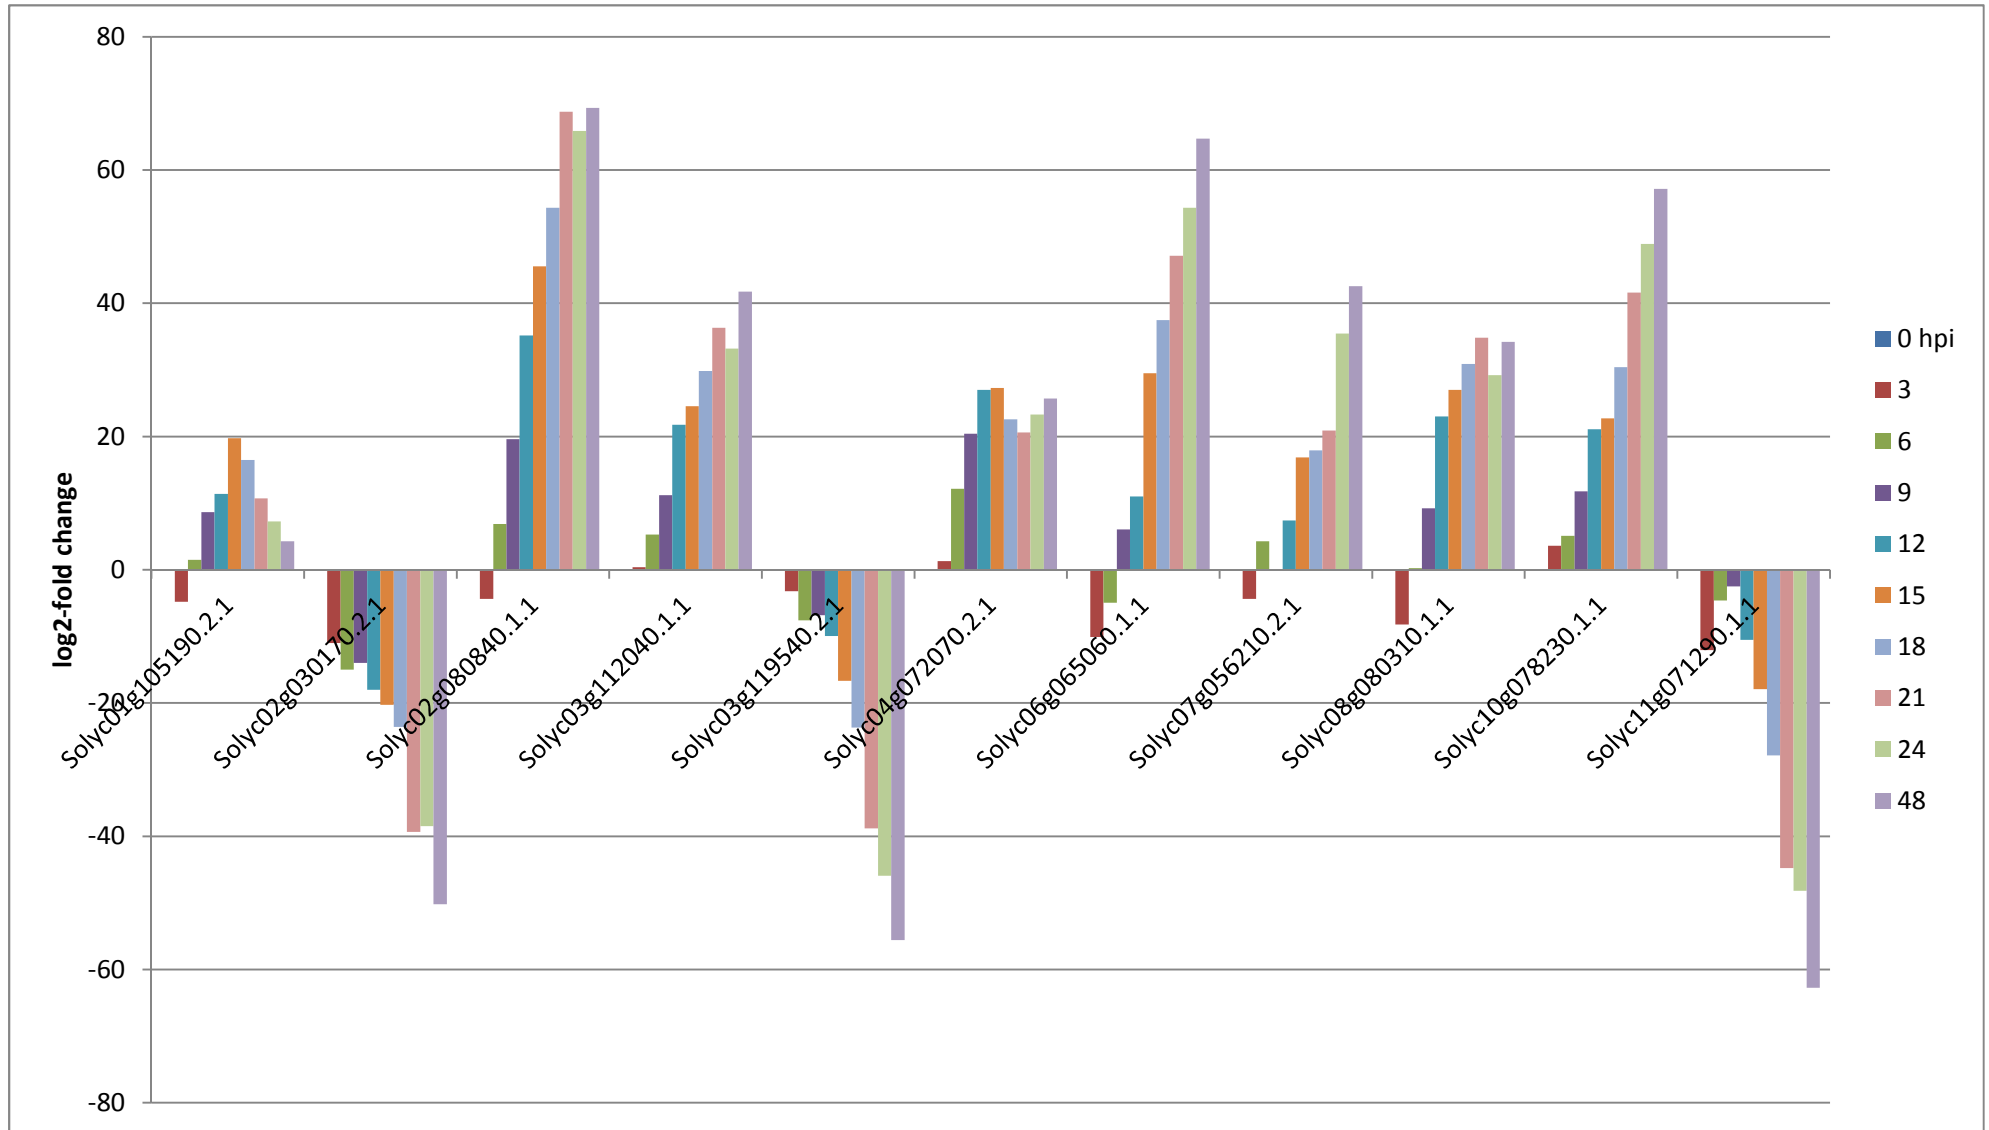

### Supplementary Figure S3

Correlation of RNA-seq expression to qPCR of *B. cinerea* infected leaf samples at 24 hpi of genes summarized in Table S1. In contrast to Supplementary Figure S1 the samples analyzed with qPCR were taken from a separate time course experiment at 24 hpi.

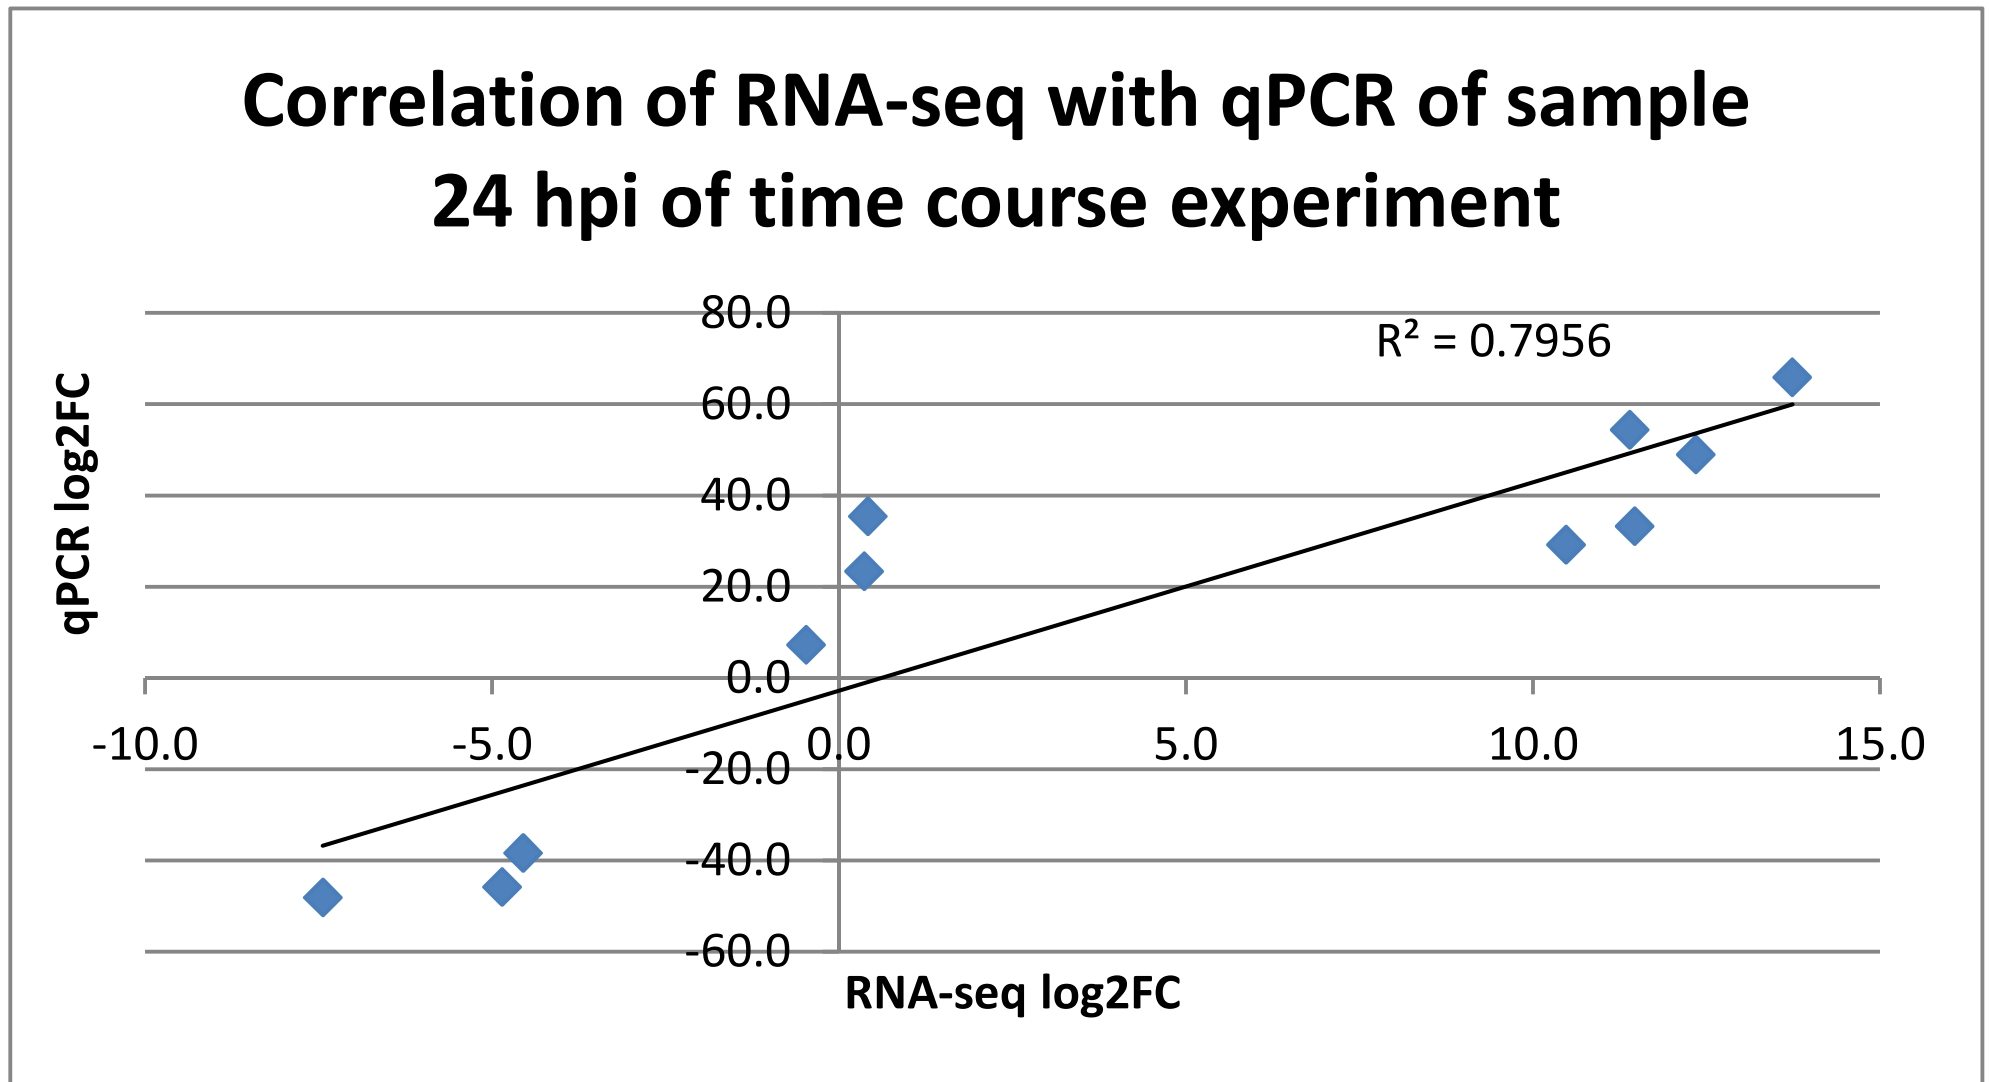

### Supplementary Figure S4.1

Venn diagram of differential expressed genes at 24 hpi identified by pairwise comparison of pathogen and mock.treated tomato leaf samples. BC, *B. cinerea*; PI, *P. infestans*; ON, *O. neolycopersici*.

Down-regulated  
genes

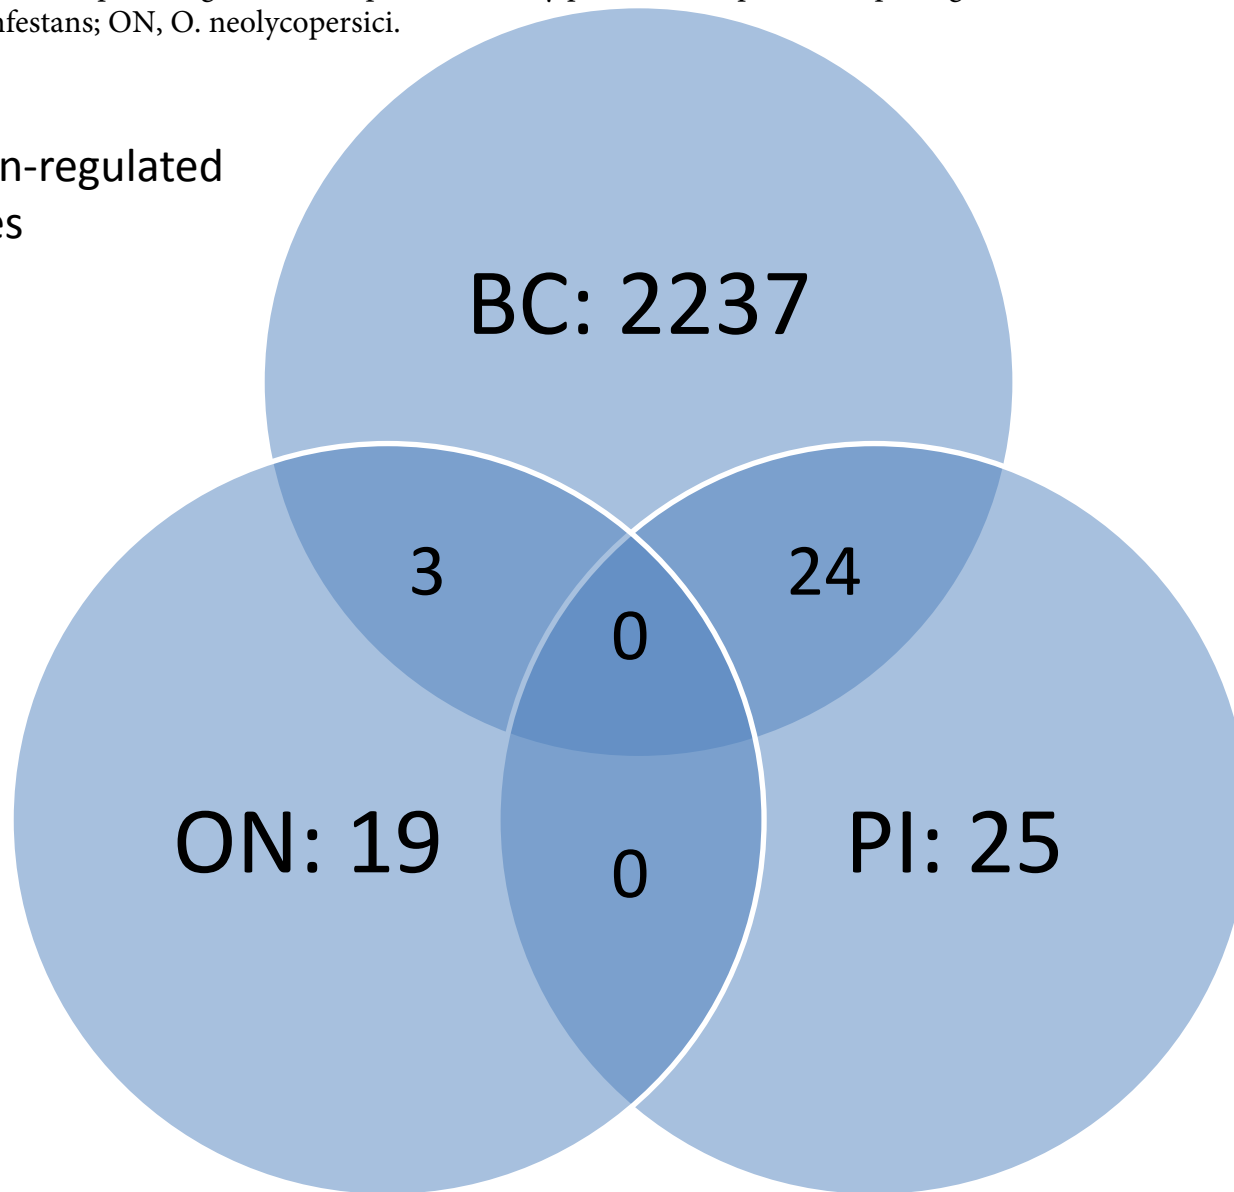

## Supplementary Figure S4.2

Venn diagram of differential expressed genes at 24 hpi identified by pairwise comparison of pathogen and mock.treated tomato leaf samples.

BC, *B. cinerea*; PI, *P. infestans*; ON, *O. neolycopersici*.

Up-regulated  
genes

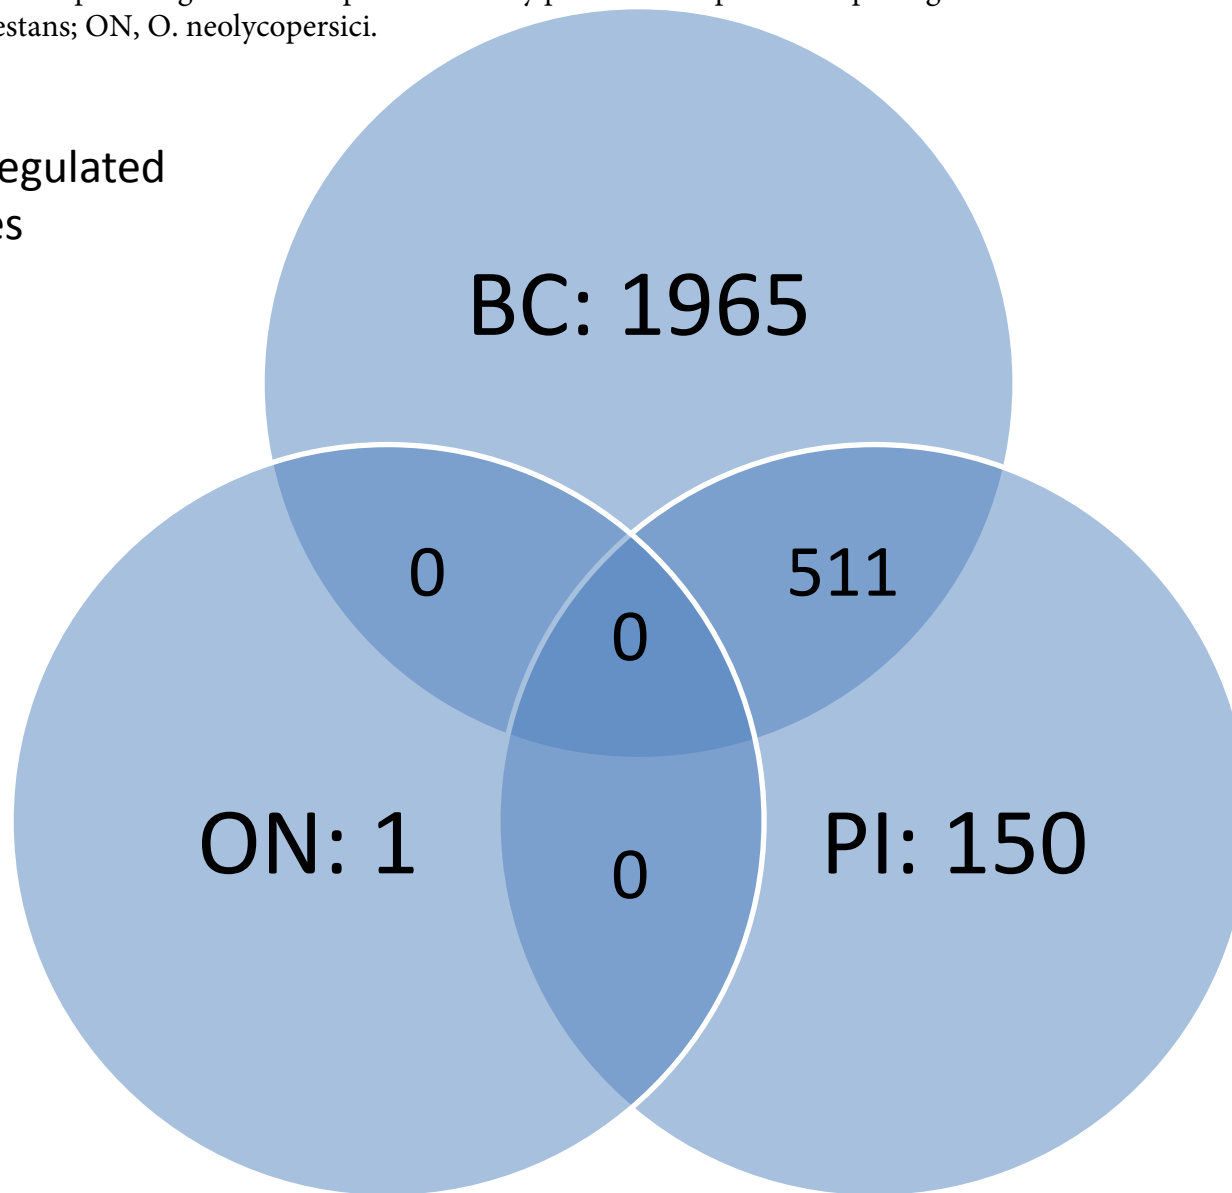

### Supplementary Figure S5

Co-occurrence of DE tomato genes down regulated during *B. cinerea* infection at 24 hpi.

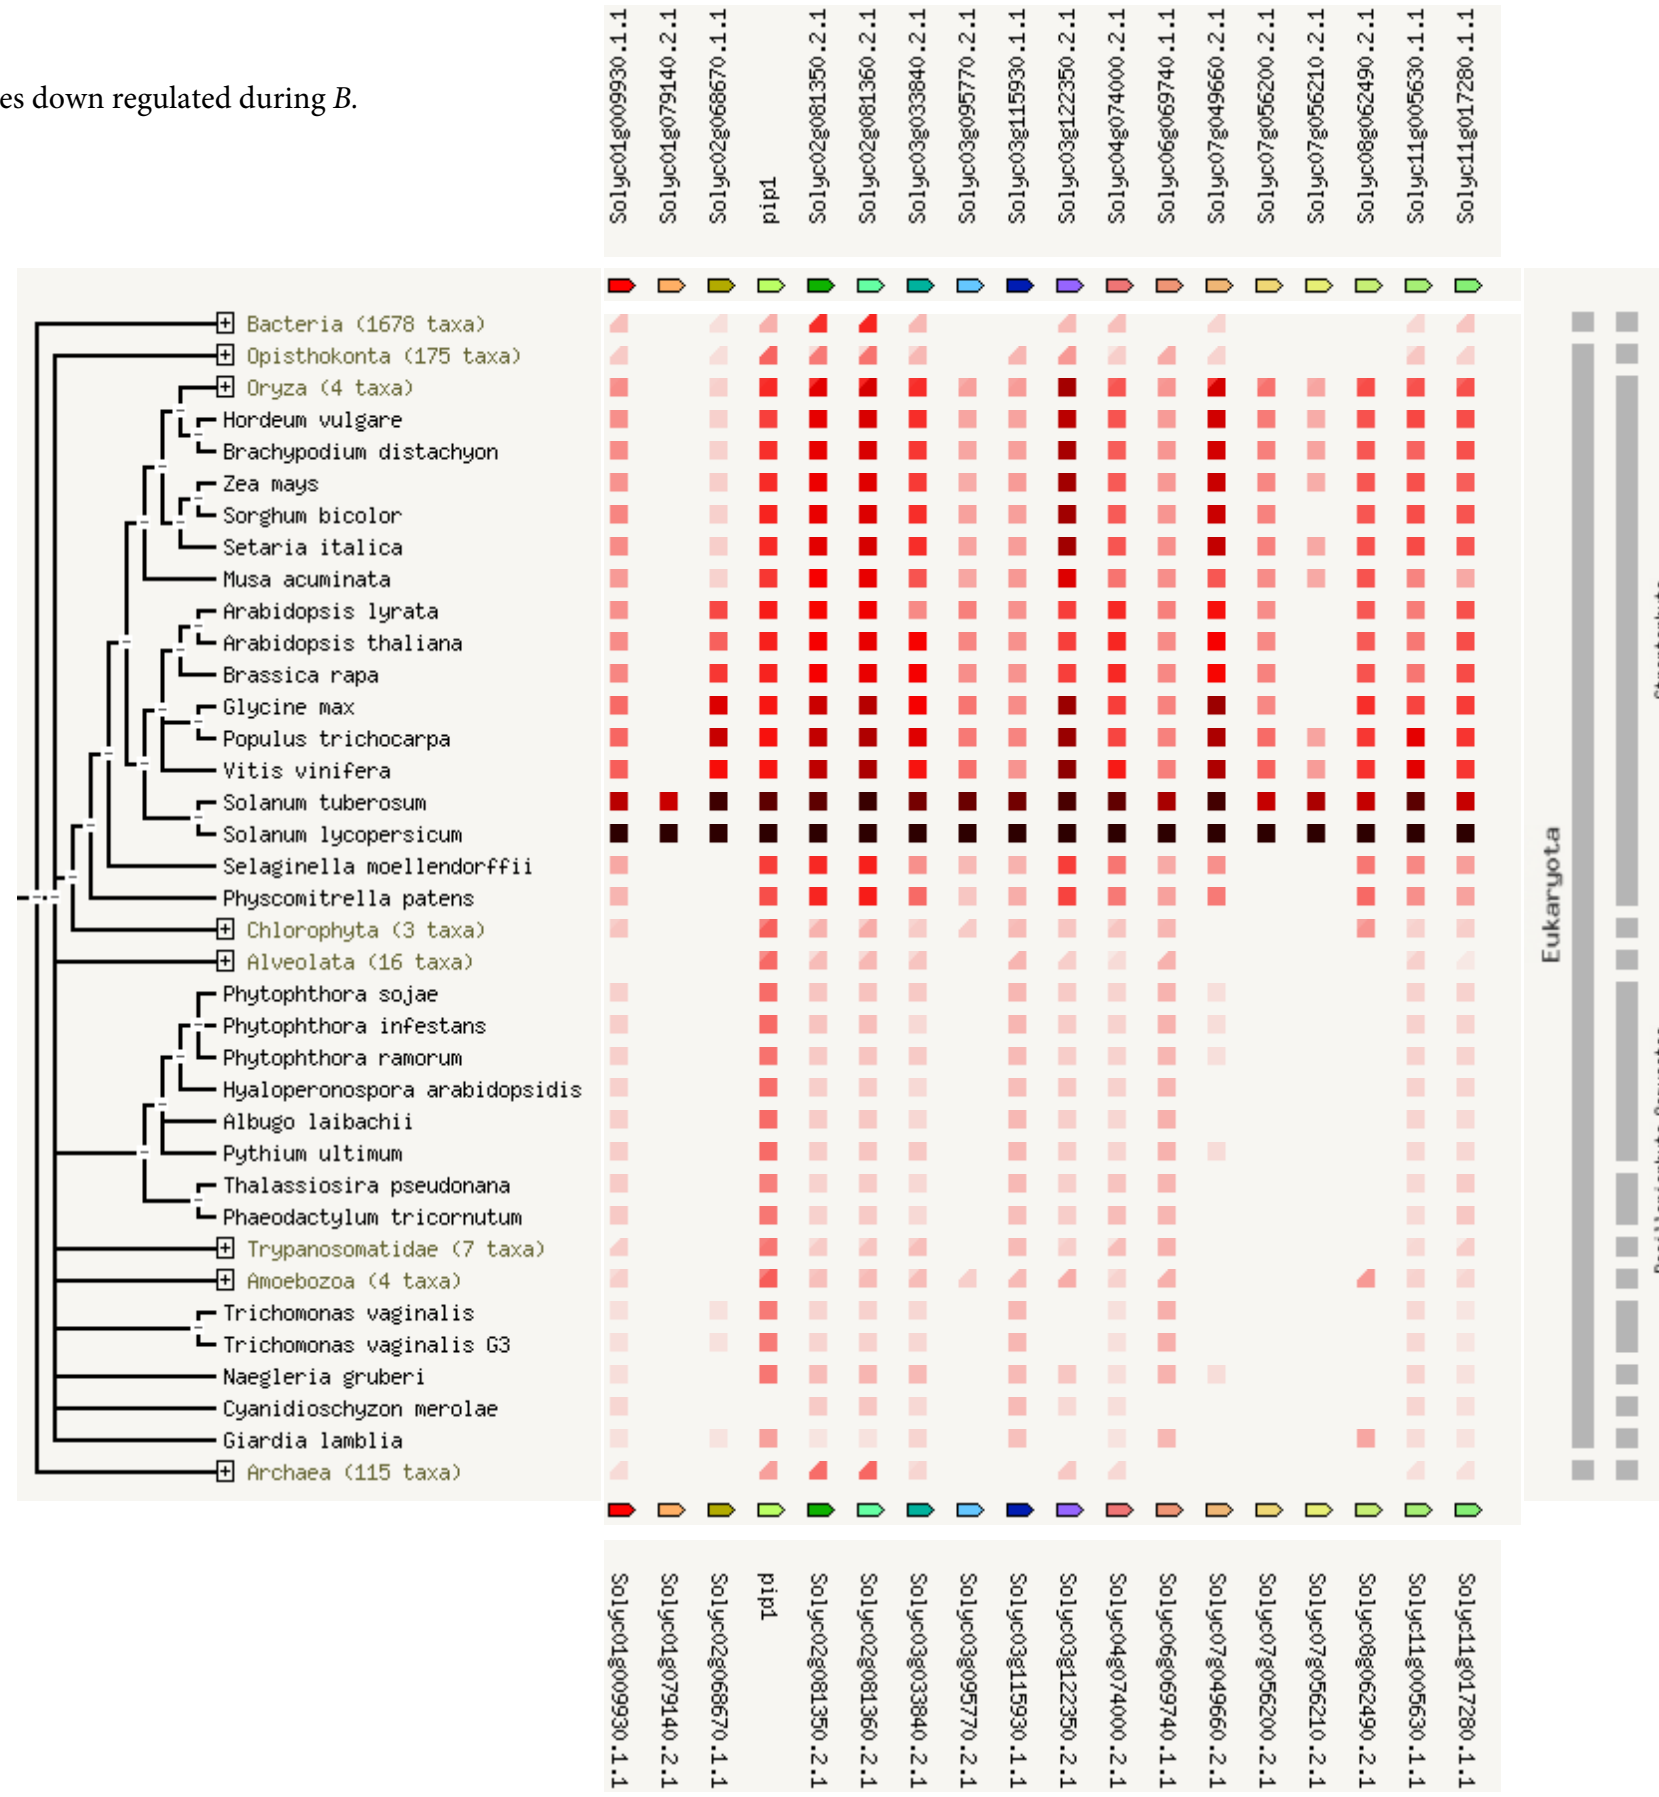

### Supplementary Figure S6

Co-occurrence of DE tomato genes up regulated during *B. cinerea* infection at 24 hpi.

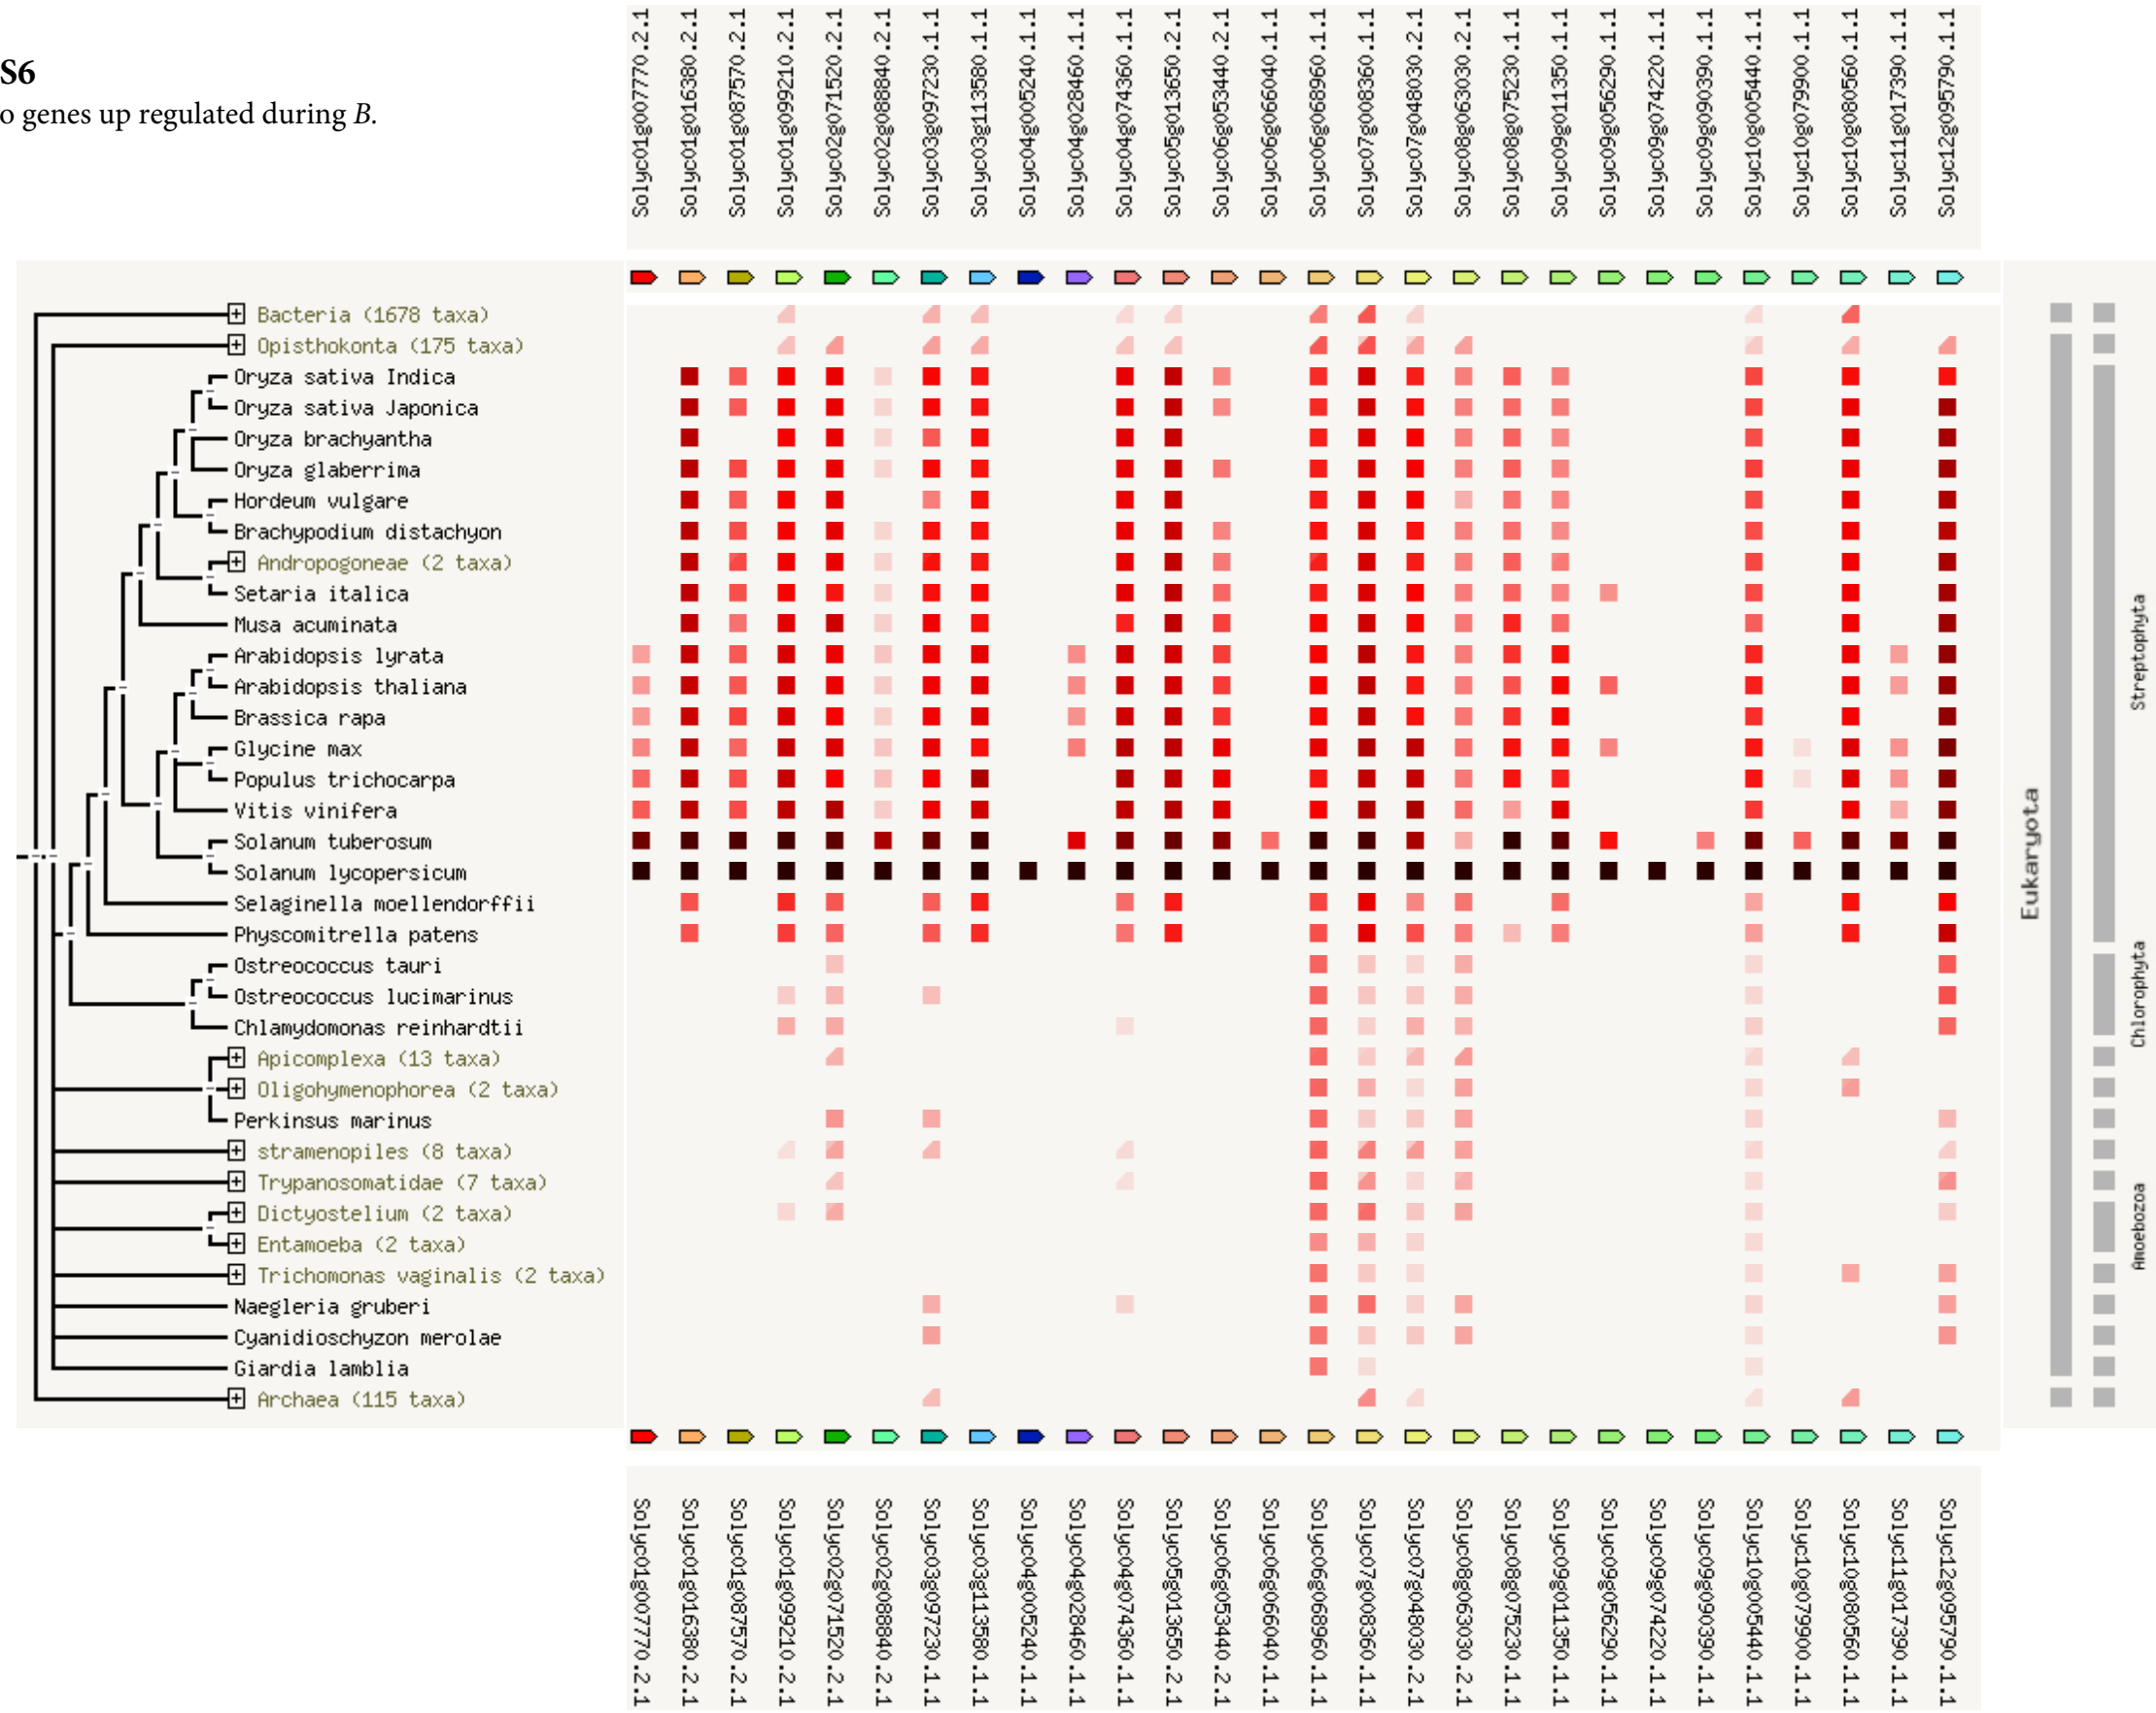



### Supplementary Figure S7

Co-occurrence of DE tomato genes up regulated during *P. infestans* infection at 24 hpi.

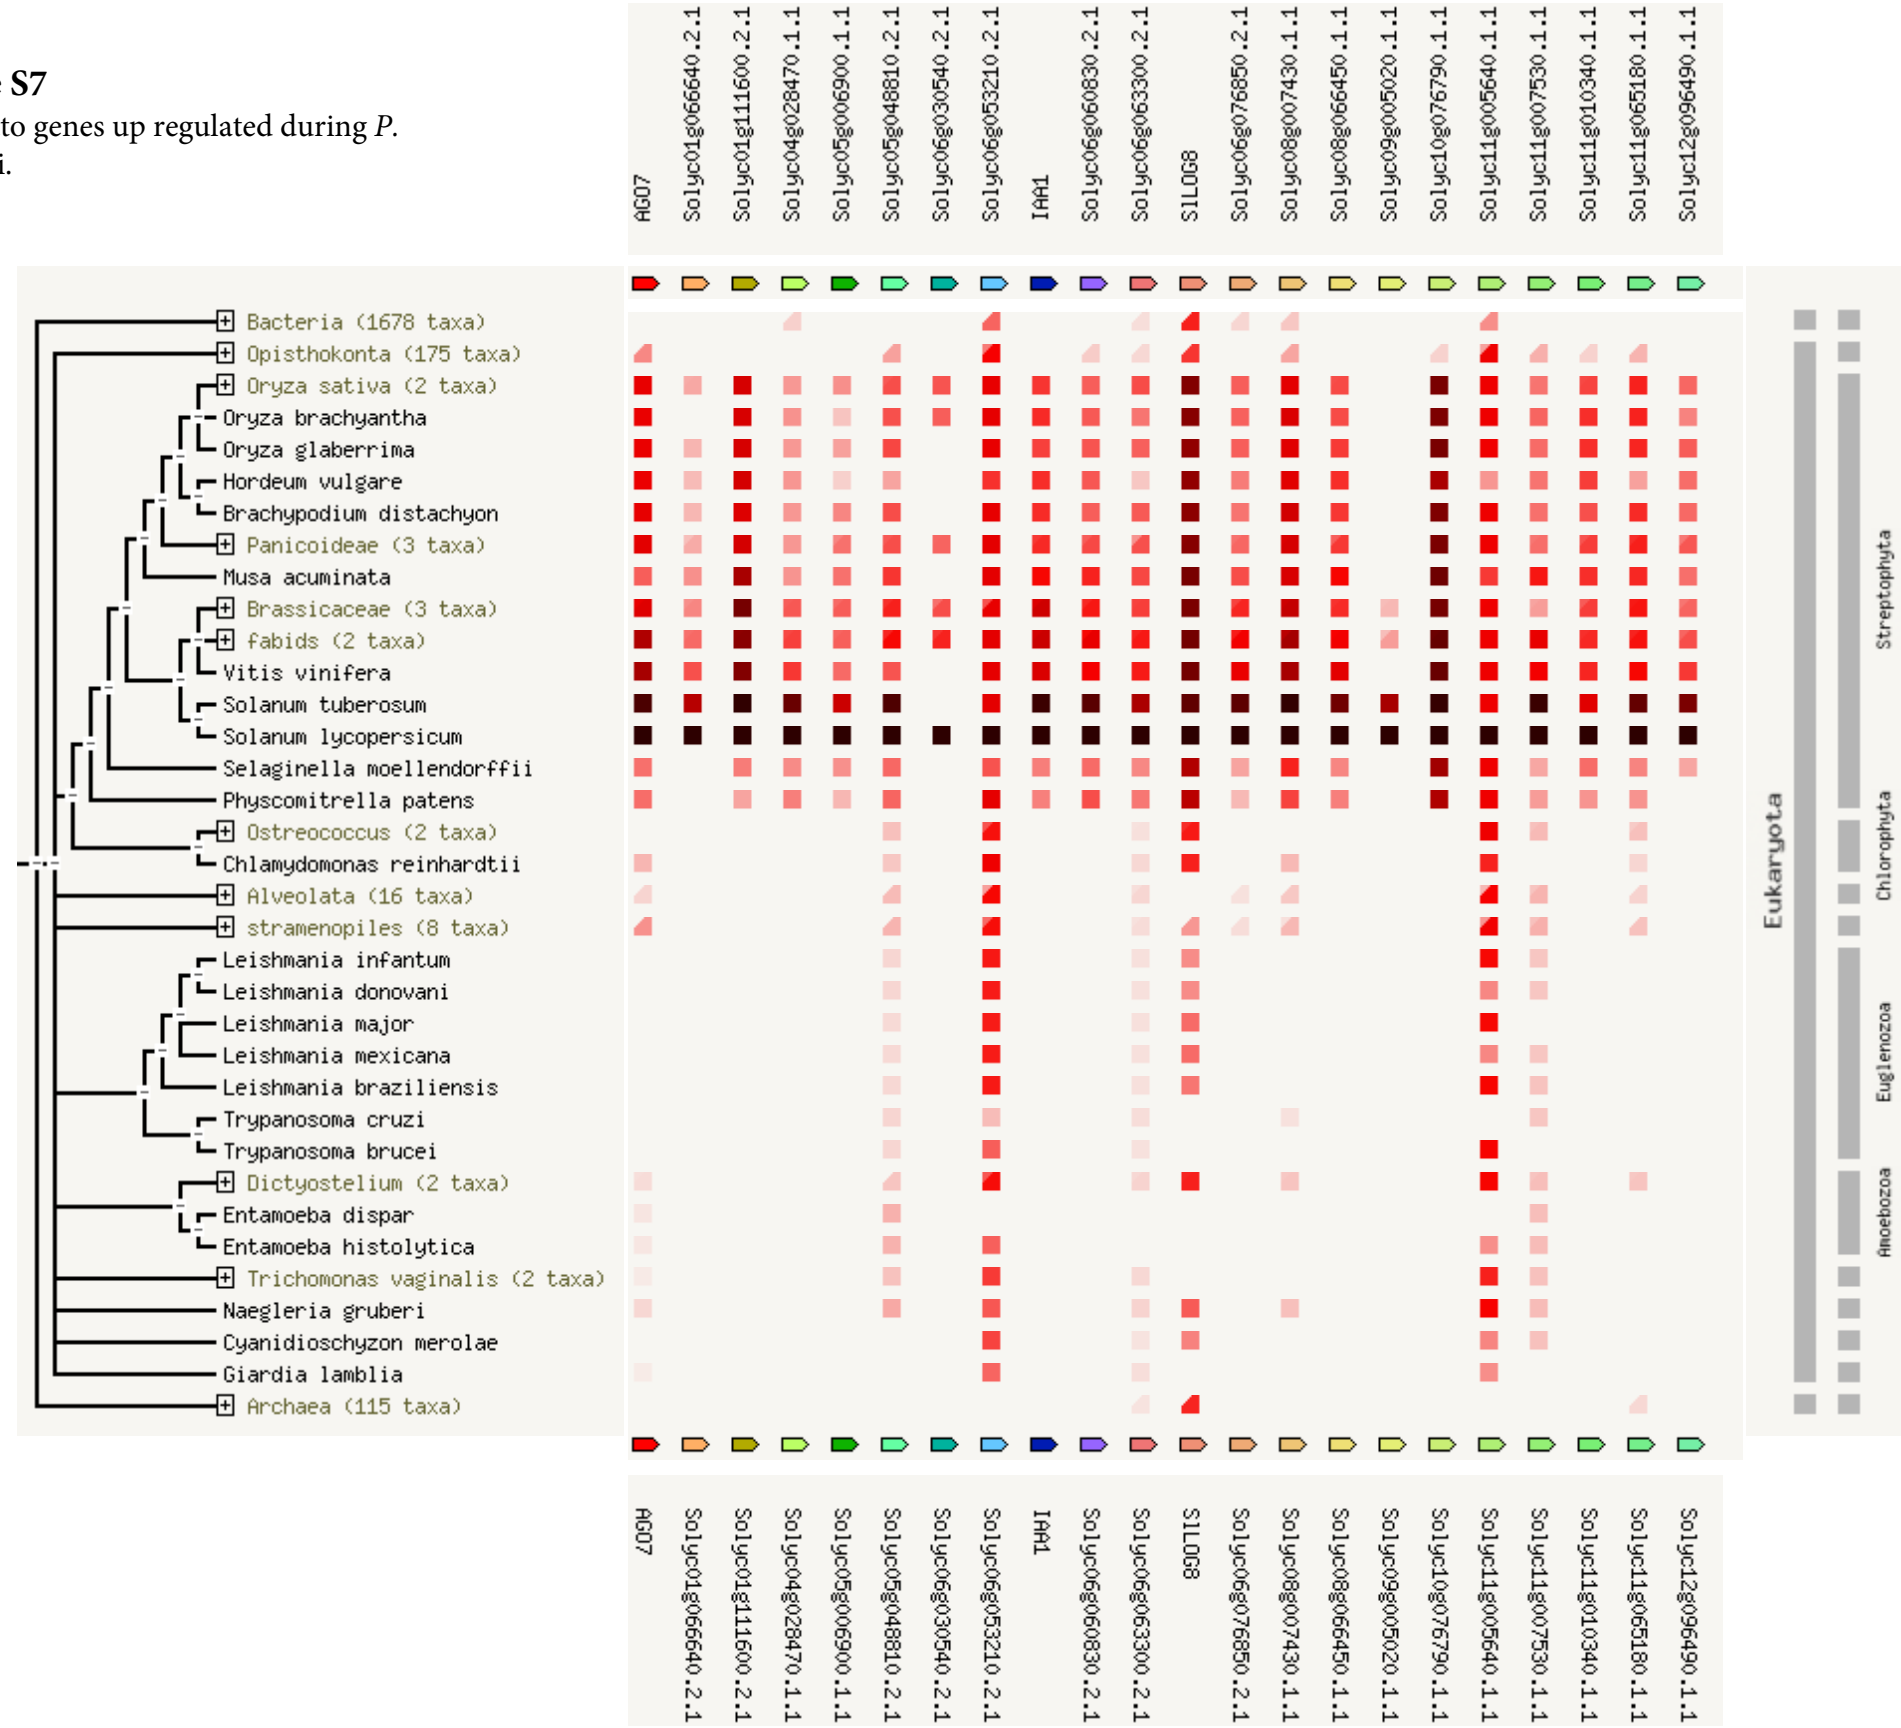

## Supplementary Table S1

Primers designed in this study and their target gene for differential expression studies. DE was measured for *B. cinerea* (BC) inoculated and corresponding mock inoculated (BCm) samples at 24hpi and normalized to 0 hpi. As reference, genes coding for U6 snRNA-associated Sm-like protein LSm7 and Calcineurin B-like protein were used (Pombo, Zheng et al. 2014, Müller, Grau et al. 2015).

| Gene ID            | Protein Name                          | Primer sequence forward | Primer sequence reverse | Efficiency | Amplicon length | RNAseq DE BC vs BCm | log2FC BC vs BCm | FDR BC vs BCm | Reference gene- and mock infections-normalized qPCR of same samples as uses for RNA-seq | Fold change log2 of qPCR in BC time course | SD   |
|--------------------|---------------------------------------|-------------------------|-------------------------|------------|-----------------|---------------------|------------------|---------------|-----------------------------------------------------------------------------------------|--------------------------------------------|------|
| Solyc01g105190.2.1 | Unknown Protein                       | TGGTCCGTGCTATTGAATTCTCT | CAGTACTGGTGCTCAAGTCTGT  | 93         | 153             | not DE              | -0.5             | 0.8           | 2.4                                                                                     | 7.2                                        | 16.9 |
| Solyc02g030170.2.1 | FAD linked oxidase domain protein     | TAGAAGTTCTGTTTGGCCTCTCT | CGAGAGAGGAAGGACGACGA    | 102        | 143             | down                | -4.6             | 4.20E-18      | 27.9                                                                                    | -38.5                                      | 12.7 |
| Solyc02g080840.1.1 | F-box-like                            | CGCGATCAAGGAAGCAGTTG    | TACTGGTAGCTGCAATGCCA    | 97         | 146             | up                  | 13.7             | 1.24E-59      | -64.3                                                                                   | 65.9                                       | 6.2  |
| Solyc03g112040.1.1 | Cytochrome P450                       | GGCTGCTGGAACCTCAAGTCT   | GACAACCTCTTCTGCCTGCA    | 97         | 167             | up                  | 11.5             | 2.81E-18      | -38.9                                                                                   | 33.2                                       | 3.7  |
| Solyc03g119540.2.1 | CONSTANS-like zinc finger protein     | TCAATCCTGATGACTACTGGCC  | GCGATACCCTTGCTTCTCTTC   | 105        | 105             | down                | -4.8             | 4.01E-22      | 38.8                                                                                    | -45.9                                      | 9.5  |
| Solyc04g072070.2.1 | WRKY transcription factor 16          | TGATGCCACACCAACACATG    | TGCAATCTCCACTTGAACACTTG | 100        | 215             | not DE              | 0.4              | 0.7           | -3.5                                                                                    | 23.3                                       | 11.6 |
| Solyc06g065060.1.1 | FAD-binding domain-containing protein | ACTTTGCAGGGTTCCCAACA    | TCCATCGAGACCTCCCTCTG    | 98         | 128             | up                  | 11.4             | 8.61E-46      | -66.4                                                                                   | 54.3                                       | 2.5  |
| Solyc07g056210.2.1 | Unknown Protein                       | AGCAGCAACTTTACCAGGAGT   | TCTCAACTGGCTCTGGACCT    | 113        | 161             | not DE              | 0.4              | 0.7           | -3.2                                                                                    | 35.4                                       | 11.1 |
| Solyc08g080310.1.1 | Multidrug resistance protein mdtK     | AGGGGAACCTTTCTTAGCTGGT  | GCACAAAAGCTTGTCCACA     | 100        | 120             | up                  | 10.5             | 3.99E-51      | -43.9                                                                                   | 29.2                                       | 6.1  |
| Solyc10g078230.1.1 | Cytochrome P450                       | TGGGAAGGATTTGATATGGGCC  | ACATTGCCAGGCTTAGTACAGT  | 117        | 174             | up                  | 12.3             | 1.37E-23      | -32.4                                                                                   | 48.9                                       | 3.5  |
| Solyc11g071290.1.1 | Alcohol dehydrogenase                 | TGCTACTGGTGGACTTGGTG    | AACACAAGTCCAGCTCCAAG    | 105        | 132             | down                | -7.4             | 1.50E-21      | 39.2                                                                                    | -48.2                                      | 18.7 |

## Supplementary Table S2

DE genes of EBSeq pattern "healthy vs. diseased" ([PI&BCm&ONm] vs [PI&BC&ON]).

| gene ID            | functional_description                                                                           |
|--------------------|--------------------------------------------------------------------------------------------------|
| Solyc01g013900.2.1 | Aldehyde dehydrogenase (AHRD V1 ***- Q71LY7_ORYSI);                                              |
| Solyc01g056270.2.1 | Unknown Protein (AHRD V1)                                                                        |
| Solyc01g056800.1.1 | Exostosin-like (AHRD V1 ***- Q2HVN7_MEDTR);                                                      |
| Solyc01g067450.1.1 | Mutator-like transposase-like (AHRD V1 *--- Q9FH11_ARATH);                                       |
| Solyc01g080820.1.1 | Unknown Protein (AHRD V1)                                                                        |
| Solyc01g090450.2.1 | Actin-related protein 2/3 complex subunit 5 (AHRD V1 **** A5AQ06_VITVI);                         |
| Solyc01g098400.2.1 | Histidine phosphotransfer protein (AHRD V1 **** B9I823_POPTR);                                   |
| Solyc01g105880.2.1 | (E)-beta-ocimene synthase (AHRD V1 **** Q5CD81_CITUN);                                           |
| Solyc02g022890.1.1 | Fatty acid hydroxylase family protein expressed (AHRD V1 ***- Q9AY73_ORYSJ);                     |
| Solyc02g078160.2.1 | Plant-specific domain TIGR01615 family protein (AHRD V1 ***- B6UDN7_MAIZE);                      |
| Solyc02g085440.2.1 | F-box family protein (AHRD V1 ***- D7MPC5_ARALY)                                                 |
| Solyc02g086410.1.1 | Unknown Protein (AHRD V1)                                                                        |
| Solyc02g086850.1.1 | RNA exonuclease 4 (AHRD V1 ***- B6T4V3_MAIZE);                                                   |
| Solyc02g094210.1.1 | Os02g0508100 protein (Fragment) (AHRD V1 ***- Q0E0Z9_ORYSJ)                                      |
| Solyc02g094860.1.1 | cytochrome P450                                                                                  |
| Solyc03g079950.2.1 | DNA-binding protein BIN4 (AHRD V1 *-.- BIN4_ARATH)                                               |
| Solyc03g113850.1.1 | Guanine nucleotide-binding protein subunit beta (AHRD V1 *-.- GBB_DICDI);                        |
| Solyc03g115320.1.1 | Expansin (AHRD V1 ***- Q7X9Q3_SAMNI);                                                            |
| Solyc03g121850.2.1 | Aleurone layer morphogenesis protein (AHRD V1 *-.- Q7XZV4_ORYSJ)                                 |
| Solyc04g005140.2.1 | Uridine kinase (AHRD V1 *-.- C3SA58_BRADI);                                                      |
| Solyc05g005170.2.1 | Polygalacturonase 2 (AHRD V1 ***- A8D0T9_ONCHC);                                                 |
| Solyc05g008240.2.1 | Unknown Protein (AHRD V1)                                                                        |
| Solyc05g009580.2.1 | Aluminum-activated malate transporter-like (AHRD V1 *--- Q5Z6M4_ORYSJ);                          |
| Solyc05g045630.1.1 | Unknown Protein (AHRD V1);                                                                       |
| Solyc05g054780.1.1 | Disease resistance response/ dirigent-like protein (AHRD V1 ***- Q9M3C8_ARATH);                  |
| Solyc06g007580.1.1 | Plant-specific domain TIGR01615 family protein (AHRD V1 *-.- B6SS18_MAIZE);                      |
| Solyc06g060970.1.1 | Expansin-like protein (AHRD V1 ***- Q0WRS3_ARATH);                                               |
| Solyc06g061060.1.1 | Unknown Protein (AHRD V1)                                                                        |
| Solyc06g074610.1.1 | Unknown Protein (AHRD V1)                                                                        |
| Solyc06g083400.1.1 | Xyloglucan endotransglucosylase/hydrolase 2 (AHRD V1 **** Q2MK81_9ROSA);                         |
| Solyc07g007420.2.1 | Leucine-rich repeat family protein (AHRD V1 ***- D7KDI8_ARALY)                                   |
| Solyc07g008400.1.1 | Pto-like, Serine/threonine kinase protein, resistance protein                                    |
| Solyc07g014730.2.1 | Phospholipase A2 (AHRD V1 **** Q5CCT8_TOBAC);                                                    |
| Solyc07g039630.1.1 | Unknown Protein (AHRD V1)                                                                        |
| Solyc07g042430.1.1 | Dimethylaniline monooxygenase (AHRD V1 **** C1GPZ2_PARBA);                                       |
| Solyc07g052490.2.1 | Myb family transcription factor (AHRD V1 **** D7M4Z5_ARALY);                                     |
| Solyc07g053400.1.1 | Unknown Protein (AHRD V1)                                                                        |
| Solyc07g055040.1.1 | Agent domain-containing protein (AHRD V1 ***- D7KG24_ARALY);                                     |
| Solyc07g062900.2.1 | Yippee family protein (AHRD V1 ***- D7MTM3_ARALY);                                               |
| Solyc08g016430.1.1 | Unknown Protein (AHRD V1)                                                                        |
| Solyc08g079230.1.1 | Cortical cell-delineating protein (AHRD V1 *--- B6T836_MAIZE);                                   |
| Solyc08g081850.1.1 | Unknown Protein (AHRD V1);                                                                       |
| Solyc08g082050.1.1 | UBX domain-containing protein (AHRD V1 ***- D7KBM2_ARALY);                                       |
| Solyc09g042480.1.1 | Chromatin remodeling complex subunit (AHRD V1 ***- B9N1U4_POPTR)                                 |
| Solyc09g042670.2.1 | Unknown Protein (AHRD V1)                                                                        |
| Solyc09g056100.1.1 | PG1 protein (AHRD V1 *-.- C4VMD4_9LACO)                                                          |
| Solyc09g059280.1.1 | Histone H3 (AHRD V1 ***- D6PYM8_ORYSI);                                                          |
| Solyc10g011980.2.1 | 2-hydroxyacid dehydrogenase (Fragment) (AHRD V1 *-.- C6F725_PSEMZ)                               |
| Solyc10g054020.1.1 | Unknown Protein (AHRD V1)                                                                        |
| Solyc11g006270.1.1 | 3-oxo-5-alpha-steroid 4-dehydrogenase family protein (AHRD V1 ***- D7M7I5_ARALY);                |
| Solyc11g011530.1.1 | Unknown Protein (AHRD V1)                                                                        |
| Solyc11g013380.1.1 | GrpE protein homolog (AHRD V1 ***- B9RJC6_RICCO);                                                |
| Solyc11g013520.1.1 | Histone acetyltransferase (AHRD V1 **** B9H794_POPTR);                                           |
| Solyc11g039370.1.1 | Unknown Protein (AHRD V1)                                                                        |
| Solyc11g044350.1.1 | WW domain containing adaptor with coiled-coil (AHRD V1 *-.- Q5U4Q0_XENTR);                       |
| Solyc11g068750.1.1 | NAC domain protein                                                                               |
| Solyc11g072230.1.1 | Glucan endo-1 3-beta-glucosidase 3 (AHRD V1 ***- B6TLN1_MAIZE);                                  |
| Solyc11g072570.1.1 | Proton-dependent oligopeptide transport family protein (AHRD V1 ***- D7LMP9_ARALY);              |
| Solyc12g019090.1.1 | Serine/threonine-protein phosphatase 7 long form homolog (AHRD V1 *--- PPP7L_ARATH);             |
| Solyc12g042630.1.1 | Mutator-like transposase-like (AHRD V1 *--- Q9FH11_ARATH);                                       |
| Solyc12g044780.1.1 | F-box family protein (AHRD V1 *-.- D7LXD8_ARALY);                                                |
| Solyc12g044790.1.1 | F-box family protein (AHRD V1 *-.- D7LXD8_ARALY);                                                |
| Solyc12g070180.1.1 | Ulp1 protease family C-terminal catalytic domain containing protein (AHRD V1 ***- Q60D46_SOLDE); |

## Supplementary Table S3

DE genes identified with pairwise correlation of *B. cinerea*- and mock-infected tomato leaf tissue.

| Gene ID            | logFC    | logCPM   | PValue   | FDR      | BCm1 | BCm2 | BCm3 | BC1    | BC2    | BC3   |      |         |      |
|--------------------|----------|----------|----------|----------|------|------|------|--------|--------|-------|------|---------|------|
| Solyc01g101190.2.1 | -16.4747 | 6.764242 | 3.52E-48 | 1.21E-44 | 0    | 0    | 0    | 0      | 13145  | 6111  | 4394 | BC up   | 2476 |
| Solyc05g046340.1.1 | -15.2992 | 5.588955 | 9.20E-42 | 1.82E-38 | 0    | 0    | 0    | 0      | 6217   | 2157  | 1939 | BC down | 2264 |
| Solyc06g066230.2.1 | -13.7785 | 6.429372 | 9.74E-60 | 1.35E-55 | 0    | 1    | 1    | 7324   | 6035   | 5317  |      |         |      |
| Solyc02g080840.1.1 | -13.7404 | 6.873349 | 4.49E-64 | 1.24E-59 | 1    | 2    | 0    | 8046   | 11358  | 6974  |      |         |      |
| Solyc01g101210.2.1 | -13.6818 | 3.972293 | 2.47E-20 | 4.21E-18 | 0    | 0    | 0    | 2577   | 225    | 460   |      |         |      |
| Solyc08g078920.1.1 | -13.3721 | 3.662473 | 2.81E-20 | 4.77E-18 | 0    | 0    | 0    | 1633   | 134    | 762   |      |         |      |
| Solyc04g054380.1.1 | -13.1697 | 3.461212 | 2.49E-32 | 1.57E-29 | 0    | 0    | 0    | 1271   | 942    | 305   |      |         |      |
| Solyc04g071590.1.1 | -12.5505 | 5.173118 | 2.18E-55 | 2.01E-51 | 0    | 2    | 0    | 1548   | 4105   | 2547  |      |         |      |
| Solyc06g083960.1.1 | -12.489  | 4.416728 | 1.21E-46 | 3.73E-43 | 0    | 0    | 1    | 809    | 2487   | 1561  |      |         |      |
| Solyc01g101050.2.1 | -12.4606 | 2.753024 | 7.28E-28 | 3.10E-25 | 0    | 0    | 0    | 256    | 686    | 548   |      |         |      |
| Solyc06g011440.1.1 | -12.3929 | 2.685667 | 3.33E-29 | 1.56E-26 | 0    | 0    | 0    | 628    | 489    | 306   |      |         |      |
| Solyc10g078230.1.1 | -12.349  | 2.641256 | 3.86E-26 | 1.37E-23 | 0    | 0    | 0    | 518    | 294    | 476   |      |         |      |
| Solyc12g019620.1.1 | -12.2345 | 2.527708 | 5.38E-29 | 2.44E-26 | 0    | 0    | 0    | 488    | 502    | 298   |      |         |      |
| Solyc01g094160.1.1 | -12.1415 | 2.434674 | 2.32E-26 | 8.45E-24 | 0    | 0    | 0    | 266    | 472    | 435   |      |         |      |
| Solyc01g101180.2.1 | -12.0011 | 8.530847 | 4.35E-26 | 1.52E-23 | 23   | 0    | 5    | 42241  | 21891  | 16329 |      |         |      |
| Solyc12g088850.1.1 | -11.9878 | 2.28157  | 1.28E-25 | 4.12E-23 | 0    | 0    | 0    | 434    | 352    | 274   |      |         |      |
| Solyc05g008170.1.1 | -11.9708 | 2.264806 | 7.32E-26 | 2.44E-23 | 0    | 0    | 0    | 422    | 407    | 242   |      |         |      |
| Solyc03g112040.1.1 | -11.4626 | 1.758643 | 1.58E-20 | 2.81E-18 | 0    | 0    | 0    | 352    | 250    | 146   |      |         |      |
| Solyc02g094270.1.1 | -11.4379 | 6.02639  | 2.20E-48 | 8.69E-45 | 0    | 10   | 0    | 5599   | 4762   | 3855  |      |         |      |
| Solyc01g008640.2.1 | -11.4352 | 1.731347 | 6.64E-21 | 1.26E-18 | 0    | 0    | 0    | 324    | 250    | 158   |      |         |      |
| Solyc06g065060.1.1 | -11.3937 | 9.271168 | 1.87E-49 | 8.61E-46 | 22   | 65   | 12   | 31507  | 68434  | 40645 |      |         |      |
| Solyc12g057070.1.1 | -10.9825 | 1.281322 | 8.59E-15 | 7.22E-13 | 0    | 0    | 0    | 326    | 132    | 72    |      |         |      |
| Solyc09g091130.2.1 | -10.969  | 1.265559 | 2.52E-16 | 2.59E-14 | 0    | 0    | 0    | 105    | 171    | 226   |      |         |      |
| Solyc02g078680.1.1 | -10.96   | 1.257146 | 2.45E-15 | 2.24E-13 | 0    | 0    | 0    | 69     | 217    | 226   |      |         |      |
| Solyc09g064760.1.1 | -10.8936 | 1.192809 | 6.38E-16 | 6.17E-14 | 0    | 0    | 0    | 264    | 142    | 92    |      |         |      |
| Solyc02g080920.1.1 | -10.8636 | 1.164004 | 1.17E-15 | 1.10E-13 | 0    | 0    | 0    | 257    | 174    | 71    |      |         |      |
| Solyc06g082420.2.1 | -10.846  | 1.148952 | 3.18E-15 | 2.85E-13 | 0    | 0    | 0    | 198    | 283    | 51    |      |         |      |
| Solyc02g070110.1.1 | -10.823  | 8.049644 | 3.27E-41 | 5.64E-38 | 12   | 38   | 12   | 8045   | 40761  | 15271 |      |         |      |
| Solyc04g077240.2.1 | -10.7872 | 1.087392 | 7.71E-17 | 8.56E-15 | 0    | 0    | 0    | 109    | 219    | 146   |      |         |      |
| Solyc09g066350.1.1 | -10.7841 | 5.370428 | 9.83E-44 | 2.47E-40 | 0    | 10   | 0    | 4326   | 2615   | 2051  |      |         |      |
| Solyc07g042220.1.1 | -10.7451 | 1.045871 | 1.87E-16 | 1.97E-14 | 0    | 0    | 0    | 194    | 166    | 97    |      |         |      |
| Solyc05g050870.2.1 | -10.7439 | 1.045931 | 7.38E-12 | 3.94E-10 | 0    | 0    | 0    | 305    | 130    | 27    |      |         |      |
| Solyc05g039950.1.1 | -10.7152 | 6.151324 | 3.14E-35 | 2.96E-32 | 1    | 4    | 11   | 8658   | 4383   | 2590  |      |         |      |
| Solyc04g015380.1.1 | -10.657  | 0.95814  | 3.08E-09 | 9.43E-08 | 0    | 0    | 0    | 351    | 49     | 16    |      |         |      |
| Solyc01g005500.2.1 | -10.6041 | 5.334685 | 3.28E-30 | 1.74E-27 | 7    | 2    | 0    | 5370   | 1826   | 1482  |      |         |      |
| Solyc07g052260.2.1 | -10.4811 | 0.777287 | 5.69E-11 | 2.52E-09 | 0    | 0    | 0    | 29     | 104    | 209   |      |         |      |
| Solyc08g080310.1.1 | -10.481  | 5.535837 | 5.77E-55 | 3.99E-51 | 4    | 9    | 0    | 3497   | 4849   | 2293  |      |         |      |
| Solyc04g072280.2.1 | -10.4093 | 10.35195 | 4.85E-18 | 5.98E-16 | 243  | 22   | 29   | 65015  | 181447 | 66004 |      |         |      |
| Solyc08g076630.1.1 | -10.3982 | 0.702106 | 6.03E-13 | 3.81E-11 | 0    | 0    | 0    | 201    | 99     | 55    |      |         |      |
| Solyc09g066160.1.1 | -10.2991 | 2.180438 | 1.72E-20 | 3.02E-18 | 0    | 1    | 0    | 115    | 523    | 378   |      |         |      |
| Solyc04g054940.1.1 | -10.2986 | 0.600465 | 2.94E-12 | 1.67E-10 | 0    | 0    | 0    | 171    | 58     | 85    |      |         |      |
| Solyc08g075980.1.1 | -10.2643 | 0.566308 | 4.62E-11 | 2.09E-09 | 0    | 0    | 0    | 194    | 41     | 70    |      |         |      |
| Solyc02g076860.2.1 | -10.2383 | 0.544255 | 2.34E-13 | 1.59E-11 | 0    | 0    | 0    | 149    | 110    | 62    |      |         |      |
| Solyc02g080850.1.1 | -10.2363 | 4.89113  | 1.11E-54 | 6.13E-51 | 0    | 8    | 2    | 2404   | 2506   | 1674  |      |         |      |
| Solyc11g069880.1.1 | -10.2314 | 2.835581 | 9.32E-27 | 3.58E-24 | 0    | 2    | 0    | 370    | 395    | 692   |      |         |      |
| Solyc06g083970.1.1 | -10.0981 | 0.404032 | 3.77E-13 | 2.46E-11 | 0    | 0    | 0    | 106    | 95     | 83    |      |         |      |
| Solyc02g086040.1.1 | -10.0722 | 0.386404 | 1.64E-10 | 6.62E-09 | 0    | 0    | 0    | 24     | 225    | 70    |      |         |      |
| Solyc08g082520.1.1 | -10.0021 | 3.088071 | 4.57E-33 | 3.32E-30 | 0    | 3    | 0    | 604    | 629    | 599   |      |         |      |
| Solyc04g071600.2.1 | -9.96564 | 7.8815   | 4.67E-43 | 1.08E-39 | 19   | 72   | 13   | 13861  | 23352  | 15590 |      |         |      |
| Solyc12g009130.1.1 | -9.96382 | 0.286779 | 4.94E-07 | 8.88E-06 | 0    | 0    | 0    | 2      | 263    | 50    |      |         |      |
| Solyc10g078220.1.1 | -9.94739 | 9.861819 | 3.42E-29 | 1.58E-26 | 108  | 285  | 20   | 60416  | 86584  | 60072 |      |         |      |
| Solyc02g078340.2.1 | -9.86691 | 2.954287 | 7.42E-33 | 5.00E-30 | 0    | 3    | 0    | 527    | 671    | 508   |      |         |      |
| Solyc12g005440.1.1 | -9.81122 | 0.115654 | 3.29E-10 | 1.26E-08 | 0    | 0    | 0    | 98     | 35     | 84    |      |         |      |
| Solyc09g014820.2.1 | -9.80565 | 2.886644 | 1.89E-29 | 9.16E-27 | 0    | 3    | 0    | 314    | 901    | 487   |      |         |      |
| Solyc06g008540.1.1 | -9.79485 | 0.10764  | 6.62E-11 | 2.89E-09 | 0    | 0    | 0    | 35     | 128    | 79    |      |         |      |
| Solyc06g082560.1.1 | -9.78601 | 0.095699 | 1.64E-11 | 8.23E-10 | 0    | 0    | 0    | 56     | 90     | 83    |      |         |      |
| Solyc03g112710.1.1 | -9.75581 | 0.067842 | 5.63E-11 | 2.50E-09 | 0    | 0    | 0    | 113    | 67     | 46    |      |         |      |
| Solyc09g066190.1.1 | -9.7541  | 4.135315 | 1.00E-40 | 1.63E-37 | 6    | 1    | 1    | 1045   | 1565   | 1250  |      |         |      |
| Solyc03g098670.1.1 | -9.74573 | 6.109675 | 1.90E-19 | 2.89E-17 | 0    | 40   | 1    | 3127   | 7883   | 4717  |      |         |      |
| Solyc06g068900.2.1 | -9.72316 | 4.706936 | 1.50E-26 | 5.60E-24 | 10   | 0    | 0    | 833    | 2864   | 2134  |      |         |      |
| Solyc12g049040.1.1 | -9.71249 | 0.02481  | 4.94E-10 | 1.79E-08 | 0    | 0    | 0    | 129    | 51     | 37    |      |         |      |
| Solyc07g062200.1.1 | -9.69847 | 0.012814 | 1.64E-11 | 8.23E-10 | 0    | 0    | 0    | 58     | 103    | 63    |      |         |      |
| Solyc08g074260.2.1 | -9.68879 | 7.32419  | 7.22E-39 | 1.05E-35 | 25   | 35   | 16   | 17873  | 8318   | 8071  |      |         |      |
| Solyc07g041650.1.1 | -9.68784 | 0.017625 | 2.21E-08 | 5.64E-07 | 0    | 0    | 0    | 15     | 214    | 32    |      |         |      |
| Solyc09g005830.1.1 | -9.64643 | 5.83165  | 7.23E-37 | 7.99E-34 | 6    | 24   | 1    | 2659   | 5282   | 4529  |      |         |      |
| Solyc07g061710.1.1 | -9.63762 | -0.0437  | 3.65E-11 | 1.69E-09 | 0    | 0    | 0    | 68     | 111    | 43    |      |         |      |
| Solyc12g005380.1.1 | -9.62476 | 2.232832 | 1.18E-24 | 3.35E-22 | 0    | 2    | 0    | 395    | 529    | 174   |      |         |      |
| Solyc03g044850.1.1 | -9.59433 | 2.298212 | 1.07E-20 | 1.97E-18 | 0    | 0    | 2    | 579    | 241    | 229   |      |         |      |
| Solyc06g075740.1.1 | -9.5798  | -0.09565 | 4.04E-10 | 1.50E-08 | 0    | 0    | 0    | 38     | 147    | 40    |      |         |      |
| Solyc05g016690.2.1 | -9.55365 | 5.138333 | 7.64E-33 | 5.03E-30 | 0    | 22   | 0    | 2803   | 2941   | 2045  |      |         |      |
| Solyc06g008550.1.1 | -9.53833 | 3.623904 | 7.48E-38 | 8.99E-35 | 3    | 2    | 1    | 655    | 1108   | 934   |      |         |      |
| Solyc10g080460.1.1 | -9.51905 | -0.17058 | 6.44E-10 | 2.28E-08 | 0    | 0    | 0    | 70     | 42     | 69    |      |         |      |
| Solyc01g080920.2.1 | -9.47601 | -0.20832 | 3.24E-10 | 1.24E-08 | 0    | 0    | 0    | 40     | 78     | 68    |      |         |      |
| Solyc05g047530.2.1 | -9.43878 | 4.39578  | 1.43E-41 | 2.63E-38 | 0    | 12   | 1    | 1102   | 2150   | 1461  |      |         |      |
| Solyc12g019640.1.1 | -9.43475 | 3.578013 | 2.80E-38 | 3.69E-35 | 0    | 7    | 0    | 835    | 1271   | 627   |      |         |      |
| Solyc03g083690.1.1 | -9.42172 | 5.152333 | 5.62E-44 | 1.55E-40 | 11   | 6    | 2    | 2944   | 2655   | 2152  |      |         |      |
| Solyc07g052370.2.1 | -9.41925 | 10.23029 | 4.86E-28 | 2.13E-25 | 283  | 357  | 48   | 112660 | 89713  | 61997 |      |         |      |
| Solyc01g090310.2.1 | -9.3796  | -0.30684 | 2.12E-08 | 5.43E-07 | 0    | 0    | 0    | 99     | 22     | 43    |      |         |      |
| Solyc09g011620.1.1 | -9.36146 | 1.338041 | 2.48E-14 | 1.97E-12 | 1    | 0    | 0    | 169    | 90     | 242   |      |         |      |

|                    |          |          |          |          |     |     |     |       |       |       |
|--------------------|----------|----------|----------|----------|-----|-----|-----|-------|-------|-------|
| Solyc08g013930.2.1 | -9.35307 | -0.31741 | 2.70E-08 | 6.70E-07 | 0   | 0   | 0   | 92    | 82    | 11    |
| Solyc11g045690.1.1 | -9.33276 | -0.34653 | 4.47E-10 | 1.63E-08 | 0   | 0   | 0   | 58    | 65    | 47    |
| Solyc09g075700.1.1 | -9.32479 | 8.549994 | 1.43E-08 | 3.83E-07 | 166 | 5   | 0   | 19109 | 45382 | 22343 |
| Solyc08g007090.1.1 | -9.32152 | 6.253816 | 3.86E-12 | 2.14E-10 | 35  | 0   | 0   | 6190  | 8598  | 3045  |
| Solyc02g070090.1.1 | -9.27395 | 8.495828 | 4.23E-22 | 8.92E-20 | 133 | 43  | 17  | 21957 | 46932 | 16761 |
| Solyc02g005340.2.1 | -9.2664  | -0.41495 | 2.52E-08 | 6.31E-07 | 0   | 0   | 0   | 95    | 27    | 33    |
| Solyc02g085800.1.1 | -9.24913 | 3.309878 | 5.12E-33 | 3.63E-30 | 3   | 3   | 0   | 880   | 983   | 409   |
| Solyc01g009370.1.1 | -9.21828 | -0.4408  | 2.42E-08 | 6.11E-07 | 0   | 0   | 0   | 43    | 123   | 15    |
| Solyc07g005920.1.1 | -9.18908 | -0.48462 | 1.97E-07 | 3.92E-06 | 0   | 0   | 0   | 107   | 33    | 13    |
| Solyc08g081820.2.1 | -9.18862 | 5.044036 | 7.41E-23 | 1.66E-20 | 0   | 14  | 10  | 575   | 5916  | 1753  |
| Solyc11g069680.1.1 | -9.18553 | 4.559023 | 3.18E-29 | 1.52E-26 | 7   | 1   | 6   | 2986  | 1170  | 923   |
| Solyc04g045280.1.1 | -9.18089 | -0.48192 | 1.29E-08 | 3.50E-07 | 0   | 0   | 0   | 58    | 95    | 16    |
| Solyc02g080830.1.1 | -9.17412 | 3.610893 | 1.82E-29 | 8.97E-27 | 0   | 9   | 0   | 432   | 1530  | 852   |
| Solyc06g065420.1.1 | -9.17179 | -0.51085 | 1.53E-08 | 4.06E-07 | 0   | 0   | 0   | 65    | 28    | 49    |
| Solyc02g080930.1.1 | -9.17007 | 3.829943 | 2.20E-22 | 4.69E-20 | 8   | 0   | 0   | 1755  | 1015  | 414   |
| Solyc07g054720.1.1 | -9.16143 | 8.227168 | 5.37E-21 | 1.04E-18 | 120 | 44  | 11  | 23240 | 23050 | 19021 |
| Solyc07g017360.1.1 | -9.15631 | -0.51807 | 3.19E-09 | 9.72E-08 | 0   | 0   | 0   | 64    | 51    | 35    |
| Solyc06g061210.2.1 | -9.15629 | 8.811003 | 5.62E-11 | 2.50E-09 | 195 | 62  | 0   | 43510 | 30072 | 24034 |
| Solyc03g025640.1.1 | -9.12795 | 5.925853 | 1.28E-12 | 7.71E-11 | 32  | 0   | 0   | 3224  | 7396  | 3497  |
| Solyc03g098570.1.1 | -9.12423 | -0.54563 | 3.40E-08 | 8.19E-07 | 0   | 0   | 0   | 16    | 88    | 50    |
| Solyc05g051350.1.1 | -8.98834 | 5.085702 | 8.43E-42 | 1.79E-38 | 12  | 5   | 7   | 2147  | 4647  | 1370  |
| Solyc01g087960.1.1 | -8.97944 | 5.296101 | 6.99E-38 | 8.79E-35 | 16  | 4   | 7   | 3663  | 3202  | 1884  |
| Solyc06g036440.1.1 | -8.9175  | 1.674045 | 2.05E-17 | 2.40E-15 | 2   | 0   | 0   | 368   | 203   | 126   |
| Solyc01g102380.2.1 | -8.91721 | -0.74115 | 4.04E-08 | 9.54E-07 | 0   | 0   | 0   | 21    | 82    | 34    |
| Solyc04g083140.1.1 | -8.90658 | 9.43843  | 2.03E-14 | 1.64E-12 | 358 | 92  | 14  | 74755 | 45970 | 31232 |
| Solyc03g111300.1.1 | -8.89134 | 3.800459 | 3.21E-35 | 2.96E-32 | 6   | 5   | 0   | 1196  | 960   | 852   |
| Solyc07g009070.2.1 | -8.88975 | -0.76612 | 1.73E-06 | 2.67E-05 | 0   | 0   | 0   | 5     | 91    | 40    |
| Solyc06g005100.2.1 | -8.82835 | -0.82371 | 9.08E-08 | 1.96E-06 | 0   | 0   | 0   | 51    | 64    | 14    |
| Solyc01g006530.1.1 | -8.79943 | -0.86643 | 3.45E-08 | 8.27E-07 | 0   | 0   | 0   | 40    | 39    | 36    |
| Solyc07g015910.2.1 | -8.7856  | -0.87363 | 5.74E-06 | 7.58E-05 | 0   | 0   | 0   | 3     | 72    | 46    |
| Solyc04g051620.1.1 | -8.77309 | 1.378463 | 2.88E-19 | 4.26E-17 | 0   | 2   | 0   | 182   | 237   | 157   |
| Solyc09g082270.2.1 | -8.76591 | 9.374882 | 5.22E-24 | 1.36E-21 | 277 | 262 | 34  | 44478 | 62003 | 41474 |
| Solyc02g036240.1.1 | -8.74292 | 3.90758  | 8.96E-25 | 2.63E-22 | 9   | 2   | 1   | 739   | 2559  | 480   |
| Solyc02g065250.1.1 | -8.71517 | 1.501971 | 0.000332 | 0.002514 | 0   | 0   | 2   | 0     | 825   | 0     |
| Solyc01g067040.1.1 | -8.71447 | -0.94251 | 6.14E-08 | 1.39E-06 | 0   | 0   | 0   | 46    | 42    | 24    |
| Solyc09g090210.2.1 | -8.64367 | 3.75159  | 5.03E-35 | 4.34E-32 | 0   | 10  | 4   | 874   | 948   | 1042  |
| Solyc06g075260.2.1 | -8.50695 | -1.13843 | 1.46E-06 | 2.30E-05 | 0   | 0   | 0   | 57    | 29    | 11    |
| Solyc12g087800.1.1 | -8.48469 | 3.357558 | 8.85E-18 | 1.08E-15 | 7   | 3   | 0   | 1425  | 677   | 197   |
| Solyc08g048260.1.1 | -8.48031 | -1.16352 | 1.99E-07 | 3.96E-06 | 0   | 0   | 0   | 28    | 45    | 24    |
| Solyc07g056100.1.1 | -8.47291 | 2.277309 | 2.23E-23 | 5.17E-21 | 0   | 2   | 3   | 381   | 403   | 283   |
| Solyc01g090980.1.1 | -8.46793 | -1.21432 | 1.73E-05 | 0.000198 | 0   | 0   | 0   | 18    | 7     | 54    |
| Solyc02g036220.1.1 | -8.46652 | 5.739531 | 6.33E-10 | 2.25E-08 | 44  | 0   | 0   | 3717  | 6472  | 2360  |
| Solyc06g060450.2.1 | -8.42886 | -1.20878 | 8.38E-07 | 1.42E-05 | 0   | 0   | 0   | 14    | 55    | 27    |
| Solyc10g055270.1.1 | -8.40649 | -1.2445  | 5.78E-07 | 1.02E-05 | 0   | 0   | 0   | 22    | 32    | 33    |
| Solyc12g049170.1.1 | -8.40167 | -1.2593  | 0.000494 | 0.003484 | 0   | 0   | 0   | 64    | 0     | 17    |
| Solyc01g110080.1.1 | -8.39701 | -1.21501 | 6.99E-06 | 8.95E-05 | 0   | 0   | 0   | 9     | 83    | 13    |
| Solyc10g050550.1.1 | -8.35215 | -1.28474 | 4.43E-06 | 6.04E-05 | 0   | 0   | 0   | 53    | 25    | 9     |
| Solyc07g018080.1.1 | -8.34655 | -1.29116 | 5.76E-07 | 1.02E-05 | 0   | 0   | 0   | 21    | 42    | 25    |
| Solyc12g096740.1.1 | -8.322   | -1.31455 | 1.94E-06 | 2.95E-05 | 0   | 0   | 0   | 45    | 27    | 13    |
| Solyc02g062300.2.1 | -8.31046 | 9.82857  | 1.71E-31 | 1.03E-28 | 441 | 437 | 196 | 90695 | 56561 | 48816 |
| Solyc01g099620.2.1 | -8.30838 | 3.194182 | 1.17E-29 | 5.97E-27 | 2   | 10  | 0   | 569   | 1086  | 470   |
| Solyc09g066200.1.1 | -8.30587 | 2.110415 | 1.35E-19 | 2.10E-17 | 0   | 2   | 3   | 153   | 542   | 297   |
| Solyc03g005500.1.1 | -8.29776 | 5.681011 | 2.48E-12 | 1.42E-10 | 45  | 5   | 0   | 4758  | 3997  | 2578  |
| Solyc12g096840.1.1 | -8.29734 | -1.34392 | 7.57E-07 | 1.29E-05 | 0   | 0   | 0   | 25    | 31    | 26    |
| Solyc12g042850.1.1 | -8.28592 | -1.34867 | 1.77E-05 | 0.000201 | 0   | 0   | 0   | 58    | 18    | 6     |
| Solyc01g098970.1.1 | -8.26902 | -1.34831 | 3.10E-06 | 4.40E-05 | 0   | 0   | 0   | 33    | 48    | 8     |
| Solyc11g044500.1.1 | -8.26462 | -1.35318 | 1.61E-06 | 2.50E-05 | 0   | 0   | 0   | 25    | 52    | 12    |
| Solyc09g013150.2.1 | -8.24204 | 9.430915 | 3.34E-15 | 2.97E-13 | 557 | 128 | 41  | 56738 | 70901 | 30727 |
| Solyc01g044520.1.1 | -8.22624 | -1.40613 | 1.38E-05 | 0.000161 | 0   | 0   | 0   | 5     | 45    | 31    |
| Solyc04g025530.2.1 | -8.21778 | 9.496654 | 8.19E-26 | 2.70E-23 | 444 | 334 | 102 | 37718 | 92768 | 39060 |
| Solyc02g070130.1.1 | -8.20526 | -1.41412 | 2.07E-05 | 0.00023  | 0   | 0   | 0   | 4     | 55    | 25    |
| Solyc03g098540.1.1 | -8.1977  | -1.42286 | 0.000343 | 0.002576 | 0   | 0   | 0   | 0     | 55    | 28    |
| Solyc02g062310.1.1 | -8.18164 | 0.982233 | 1.98E-10 | 7.85E-09 | 2   | 0   | 0   | 287   | 115   | 34    |
| Solyc06g076160.2.1 | -8.17832 | 8.406129 | 1.32E-29 | 6.63E-27 | 160 | 266 | 49  | 29476 | 24315 | 19886 |
| Solyc04g028460.1.1 | -8.16558 | -1.52066 | 0.00046  | 0.003291 | 0   | 0   | 0   | 2     | 4     | 55    |
| Solyc10g011920.1.1 | -8.14071 | 0.142526 | 2.16E-10 | 8.50E-09 | 1   | 0   | 0   | 117   | 70    | 50    |
| Solyc06g060600.1.1 | -8.13968 | 1.73761  | 1.52E-15 | 1.41E-13 | 0   | 0   | 4   | 148   | 546   | 129   |
| Solyc01g107080.2.1 | -8.11624 | 8.585139 | 2.23E-30 | 1.23E-27 | 240 | 161 | 94  | 32793 | 31188 | 20856 |
| Solyc07g064660.1.1 | -8.11037 | 6.210495 | 7.86E-37 | 8.36E-34 | 25  | 59  | 26  | 2953  | 10699 | 4054  |
| Solyc09g059410.1.1 | -8.07595 | -1.55733 | 0.000138 | 0.001187 | 0   | 0   | 0   | 55    | 4     | 8     |
| Solyc04g078170.1.1 | -8.07427 | -1.53117 | 4.52E-06 | 6.15E-05 | 0   | 0   | 0   | 27    | 41    | 9     |
| Solyc03g097510.1.1 | -8.04764 | 1.25907  | 4.00E-15 | 3.52E-13 | 2   | 1   | 0   | 93    | 292   | 161   |
| Solyc07g065150.1.1 | -8.03967 | -1.56392 | 2.43E-05 | 0.000265 | 0   | 0   | 0   | 38    | 32    | 4     |
| Solyc07g052130.1.1 | -8.01446 | 5.139007 | 7.08E-24 | 1.78E-21 | 26  | 26  | 0   | 2302  | 4116  | 1759  |
| Solyc12g088330.1.1 | -7.99908 | 3.334798 | 5.35E-24 | 1.38E-21 | 0   | 4   | 11  | 1008  | 717   | 485   |
| Solyc09g059160.1.1 | -7.99459 | -1.59981 | 1.23E-05 | 0.000146 | 0   | 0   | 0   | 27    | 41    | 6     |
| Solyc11g069870.1.1 | -7.98965 | -1.62549 | 3.29E-06 | 4.64E-05 | 0   | 0   | 0   | 19    | 30    | 19    |
| Solyc07g042880.1.1 | -7.98179 | -1.64462 | 5.16E-06 | 6.90E-05 | 0   | 0   | 0   | 23    | 19    | 22    |
| Solyc04g052960.1.1 | -7.97852 | -1.62591 | 4.72E-06 | 6.39E-05 | 0   | 0   | 0   | 26    | 33    | 11    |
| Solyc10g009530.2.1 | -7.97679 | -0.01746 | 3.13E-10 | 1.20E-08 | 1   | 0   | 0   | 91    | 82    | 44    |
| Solyc02g036180.1.1 | -7.96686 | 0.568739 | 1.45E-12 | 8.69E-11 | 0   | 2   | 0   | 84    | 206   | 62    |
| Solyc05g041220.1.1 | -7.96598 | -1.63106 | 9.95E-06 | 0.000121 | 0   | 0   | 0   | 10    | 46    | 16    |
| Solyc12g006750.1.1 | -7.96225 | -1.6496  | 0.000988 | 0.006278 | 0   | 0   | 0   | 56    | 9     | 0     |
| Solyc07g005380.2.1 | -7.95535 | 7.524748 | 1.57E-24 | 4.35E-22 | 128 | 93  | 47  | 22287 | 10300 | 7334  |

|                     |          |          |          |          |      |      |      |       |        |       |
|---------------------|----------|----------|----------|----------|------|------|------|-------|--------|-------|
| Solyc05g050730.1.1  | -7.95016 | -0.07413 | 7.84E-10 | 2.73E-08 | 0    | 0    | 1    | 26    | 96     | 83    |
| Solyc03g096420.1.1  | -7.93708 | 1.339569 | 2.10E-15 | 1.92E-13 | 0    | 4    | 0    | 110   | 243    | 200   |
| Solyc03g006440.1.1  | -7.93459 | -1.69884 | 3.61E-05 | 0.000377 | 0    | 0    | 0    | 32    | 7      | 20    |
| Solyc07g062480.1.1  | -7.91828 | 6.298948 | 2.80E-18 | 3.57E-16 | 60   | 50   | 10   | 10723 | 2766   | 3108  |
| Solyc02g065150.1.1  | -7.91252 | 2.61779  | 8.31E-17 | 9.19E-15 | 6    | 3    | 0    | 163   | 550    | 595   |
| Solyc02g087090.2.1  | -7.90551 | -0.08737 | 8.45E-10 | 2.92E-08 | 1    | 0    | 0    | 89    | 63     | 49    |
| Solyc01g079970.2.1  | -7.90127 | 0.751746 | 6.74E-07 | 1.17E-05 | 2    | 0    | 0    | 313   | 29     | 13    |
| Solyc08g078170.1.1  | -7.88864 | 3.719819 | 5.29E-33 | 3.65E-30 | 10   | 9    | 2    | 1060  | 1312   | 624   |
| Solyc02g065090.2.1  | -7.88632 | 8.695896 | 1.77E-09 | 5.70E-08 | 464  | 41   | 23   | 62974 | 13770  | 11545 |
| Solyc12g098790.1.1  | -7.8781  | -1.77285 | 0.001198 | 0.007392 | 0    | 0    | 0    | 26    | 0      | 27    |
| Solyc11g043160.1.1  | -7.87583 | -1.73015 | 1.43E-05 | 0.000166 | 0    | 0    | 0    | 33    | 19     | 10    |
| Solyc07g008120.2.1  | -7.84426 | 4.467588 | 2.85E-14 | 2.23E-12 | 27   | 3    | 0    | 1670  | 1528   | 1530  |
| Solyc02g038740.2.1  | -7.81206 | 9.8873   | 3.96E-35 | 3.53E-32 | 423  | 930  | 382  | 94512 | 64879  | 47146 |
| Solyc07g007740.1.1  | -7.80463 | -1.79912 | 1.04E-05 | 0.000127 | 0    | 0    | 0    | 13    | 26     | 20    |
| Solyc11g006050.1.1  | -7.78814 | 1.821823 | 1.00E-11 | 5.23E-10 | 5    | 0    | 0    | 493   | 130    | 124   |
| Solyc09g082480.1.1  | -7.77268 | -1.86581 | 0.000112 | 0.000999 | 0    | 0    | 0    | 16    | 5      | 29    |
| Solyc08g066100.2.1  | -7.77106 | 1.424137 | 3.02E-13 | 2.02E-11 | 0    | 5    | 0    | 63    | 273    | 247   |
| Solyc05g006630.1.1  | -7.7707  | -1.83348 | 1.77E-05 | 0.000201 | 0    | 0    | 0    | 10    | 25     | 22    |
| Solyc01g099040.2.1  | -7.76271 | -1.77167 | 0.000461 | 0.003298 | 0    | 0    | 0    | 2     | 66     | 4     |
| Solyc04g051360.2.1  | -7.76264 | -0.35691 | 8.43E-09 | 2.38E-07 | 0    | 1    | 0    | 24    | 57     | 79    |
| Solyc03g005520.1.1  | -7.75113 | 3.940826 | 6.16E-39 | 9.46E-36 | 9    | 14   | 5    | 1030  | 1394   | 973   |
| Solyc02g078930.1.1  | -7.72794 | 3.778183 | 6.80E-24 | 1.72E-21 | 16   | 4    | 2    | 1187  | 1322   | 606   |
| Solyc05g006310.1.1  | -7.72594 | -1.86131 | 1.74E-05 | 0.000199 | 0    | 0    | 0    | 10    | 31     | 17    |
| Solyc05g013650.2.1  | -7.71179 | -1.84834 | 4.07E-05 | 0.000418 | 0    | 0    | 0    | 9     | 45     | 9     |
| Solyc08g078180.1.1  | -7.69944 | 6.336483 | 1.80E-33 | 1.35E-30 | 20   | 121  | 34   | 6228  | 6918   | 4713  |
| Solyc04g081620.1.1  | -7.69124 | -1.9089  | 0.000127 | 0.001108 | 0    | 0    | 0    | 37    | 7      | 8     |
| Solyc12g088800.1.1  | -7.66929 | 5.754625 | 1.03E-38 | 1.43E-35 | 36   | 28   | 33   | 3825  | 5642   | 2829  |
| Solyc01g095080.2.1  | -7.66806 | 9.21447  | 1.09E-08 | 2.99E-07 | 780  | 104  | 6    | 41296 | 71591  | 26310 |
| Solyc01g006840.2.1  | -7.65806 | 3.168963 | 9.27E-26 | 3.01E-23 | 6    | 12   | 0    | 539   | 751    | 659   |
| Solyc03g078270.1.1  | -7.65517 | 4.348022 | 1.95E-34 | 1.63E-31 | 17   | 19   | 3    | 1463  | 2036   | 1102  |
| Solyc04g008530.1.1  | -7.63863 | -1.96929 | 0.000777 | 0.005138 | 0    | 0    | 0    | 37    | 1      | 10    |
| Solyc02g078650.2.1  | -7.63407 | 10.1228  | 5.75E-32 | 3.53E-29 | 542  | 1316 | 485  | 56454 | 168117 | 46992 |
| Solyc04g080320.1.1  | -7.63256 | -1.93985 | 1.87E-05 | 0.000211 | 0    | 0    | 0    | 18    | 27     | 10    |
| Solyc11g068570.1.1  | -7.62615 | -1.95533 | 0.000107 | 0.000958 | 0    | 0    | 0    | 34    | 13     | 5     |
| Solyc05g012660.1.1  | -7.60183 | 6.515922 | 2.38E-37 | 2.74E-34 | 48   | 116  | 33   | 6992  | 9100   | 4649  |
| Solyc08g059710.2.1  | -7.60042 | 3.921741 | 3.20E-30 | 1.74E-27 | 16   | 8    | 4    | 1182  | 1345   | 841   |
| Solyc10g050730.1.1  | -7.57602 | 2.919311 | 6.82E-15 | 5.76E-13 | 0    | 19   | 0    | 873   | 581    | 241   |
| Solyc07g005080.1.1  | -7.56237 | 0.164894 | 6.77E-11 | 2.95E-09 | 0    | 2    | 0    | 97    | 114    | 43    |
| Solyc01g106530.1.1  | -7.55447 | -0.46348 | 1.90E-06 | 2.91E-05 | 0    | 0    | 1    | 63    | 9      | 66    |
| Solyc05g053610.2.1  | -7.54746 | 6.199215 | 8.48E-09 | 2.39E-07 | 0    | 204  | 8    | 2945  | 9964   | 4366  |
| Solyc02g071480.2.1  | -7.52205 | -2.03804 | 0.000277 | 0.002145 | 0    | 0    | 0    | 32    | 16     | 2     |
| Solyc03g044180.1.1  | -7.49737 | 7.340985 | 1.72E-10 | 6.86E-09 | 195  | 120  | 1    | 12204 | 16784  | 7993  |
| Solyc10g085110.1.1  | -7.49559 | -2.06329 | 0.000124 | 0.001082 | 0    | 0    | 0    | 28    | 17     | 4     |
| NCRNA_1_340         | -7.48039 | -2.07409 | 7.69E-05 | 0.000722 | 0    | 0    | 0    | 6     | 30     | 14    |
| Solyc02g021350.2.1  | -7.4775  | 2.252718 | 2.28E-19 | 3.44E-17 | 5    | 5    | 0    | 236   | 569    | 288   |
| Solyc11g071990.1.1  | -7.47015 | 4.021055 | 8.94E-37 | 9.15E-34 | 8    | 20   | 9    | 796   | 1986   | 968   |
| Solyc10g011930.1.1  | -7.46251 | 7.187878 | 4.92E-14 | 3.70E-12 | 125  | 211  | 4    | 12242 | 13279  | 7203  |
| Solyc06g048800.1.1  | -7.46164 | -0.64992 | 2.27E-08 | 5.78E-07 | 0    | 1    | 0    | 39    | 33     | 56    |
| Solyc11g069560.1.1  | -7.44281 | 6.245413 | 9.15E-09 | 2.56E-07 | 118  | 13   | 1    | 8966  | 5700   | 2331  |
| Solyc11g018800.1.1  | -7.4123  | 9.624571 | 8.71E-22 | 1.81E-19 | 836  | 609  | 223  | 86730 | 50648  | 34613 |
| Solyc03g112030.1.1  | -7.41102 | 6.472884 | 4.35E-25 | 1.35E-22 | 92   | 68   | 29   | 9487  | 6615   | 3584  |
| Solyc09g097950.1.1  | -7.40557 | -2.11606 | 0.000115 | 0.001019 | 0    | 0    | 0    | 9     | 36     | 6     |
| Solyc01g102900.2.1  | -7.39265 | 2.004317 | 2.53E-12 | 1.44E-10 | 0    | 3    | 6    | 57    | 542    | 321   |
| Solyc06g075730.1.1  | -7.38768 | -0.01095 | 3.67E-10 | 1.77E-08 | 0    | 2    | 0    | 45    | 110    | 66    |
| Solyc03g078280.1.1  | -7.38481 | 4.334743 | 7.85E-28 | 3.29E-25 | 22   | 22   | 2    | 1432  | 1927   | 1155  |
| Solyc07g052120.2.1  | -7.37654 | 7.595074 | 4.52E-18 | 5.60E-16 | 234  | 157  | 24   | 12509 | 20997  | 10615 |
| Solyc08g006750.2.1  | -7.37341 | 9.392492 | 1.44E-19 | 2.22E-17 | 854  | 310  | 185  | 49808 | 69791  | 33600 |
| Solyc07g049670.2.1  | -7.36499 | 2.494697 | 1.67E-12 | 9.86E-11 | 6    | 7    | 0    | 855   | 152    | 174   |
| Solyc08g079080.2.1  | -7.35403 | 1.004438 | 3.35E-11 | 1.56E-09 | 0    | 5    | 0    | 42    | 310    | 125   |
| Solyc12g013470.1.1  | -7.34905 | 1.025211 | 3.67E-14 | 2.82E-12 | 0    | 5    | 0    | 169   | 181    | 102   |
| TRNA_1_54           | -7.3455  | -2.23352 | 0.000439 | 0.003168 | 0    | 0    | 0    | 24    | 3      | 12    |
| Solyc01g087950.2.1  | -7.3426  | 1.360858 | 1.41E-12 | 8.45E-11 | 5    | 0    | 0    | 125   | 359    | 124   |
| Solyc10g018340.1.1  | -7.33974 | 5.636573 | 2.77E-27 | 1.09E-24 | 19   | 110  | 13   | 4075  | 4487   | 2561  |
| Solyc10g018320.1.1  | -7.32959 | -2.23351 | 0.000827 | 0.005407 | 0    | 0    | 0    | 32    | 3      | 5     |
| Solyc05g010170.1.1  | -7.32058 | 2.174326 | 1.27E-10 | 5.23E-09 | 8    | 1    | 0    | 665   | 203    | 107   |
| Solyc04g072000.2.1  | -7.31674 | 9.305471 | 8.54E-19 | 1.19E-16 | 767  | 569  | 97   | 48187 | 61166  | 33178 |
| Solyc02g077580.1.1  | -7.30857 | 1.808764 | 1.64E-13 | 1.15E-11 | 7    | 0    | 0    | 166   | 398    | 228   |
| Solyc08g068710.1.1  | -7.30147 | 9.309687 | 1.01E-22 | 2.26E-20 | 700  | 621  | 166  | 60773 | 50469  | 29424 |
| Solyc10g084910.1.1  | -7.28924 | -2.27485 | 0.000137 | 0.001181 | 0    | 0    | 0    | 8     | 13     | 18    |
| Solyc03g0066230.1.1 | -7.28379 | -2.30351 | 0.000371 | 0.002745 | 0    | 0    | 0    | 10    | 5      | 21    |
| Solyc12g096750.1.1  | -7.27835 | -0.6647  | 9.87E-07 | 1.63E-05 | 1    | 0    | 0    | 75    | 56     | 10    |
| Solyc06g076060.1.1  | -7.26812 | 0.671596 | 1.54E-12 | 9.11E-11 | 0    | 4    | 0    | 127   | 139    | 85    |
| Solyc10g012100.1.1  | -7.26488 | -2.26725 | 0.000993 | 0.006304 | 0    | 0    | 0    | 30    | 10     | 1     |
| Solyc11g005860.1.1  | -7.25286 | 2.908265 | 8.74E-15 | 7.30E-13 | 0    | 24   | 0    | 504   | 634    | 500   |
| Solyc01g008870.1.1  | -7.24291 | 3.364463 | 3.21E-26 | 1.15E-23 | 3    | 16   | 9    | 1066  | 645    | 511   |
| NCRNA_3_252         | -7.23152 | 0.289558 | 1.98E-10 | 7.85E-09 | 0    | 3    | 0    | 64    | 195    | 39    |
| Solyc05g052420.1.1  | -7.22633 | 2.113191 | 1.05E-10 | 4.37E-09 | 8    | 0    | 1    | 550   | 105    | 226   |
| Solyc07g039570.2.1  | -7.21673 | 6.025605 | 2.19E-13 | 1.50E-11 | 44   | 155  | 1    | 4268  | 6995   | 3570  |
| Solyc04g079260.2.1  | -7.21411 | 7.563418 | 1.88E-27 | 7.51E-25 | 151  | 178  | 152  | 5733  | 25108  | 13017 |
| Solyc05g021390.2.1  | -7.20337 | 2.2342   | 1.06E-12 | 6.45E-11 | 0    | 15   | 0    | 558   | 362    | 135   |
| Solyc03g098740.1.1  | -7.19608 | 10.29519 | 5.86E-15 | 5.02E-13 | 1894 | 839  | 160  | 79244 | 136986 | 70186 |
| Solyc12g040760.1.1  | -7.17364 | -2.35389 | 0.000128 | 0.001119 | 0    | 0    | 0    | 17    | 13     | 8     |
| Solyc10g076240.1.1  | -7.16793 | 10.31329 | 2.95E-24 | 7.85E-22 | 299  | 2509 | 1170 | 72411 | 112114 | 92799 |
| Solyc06g075100.2.1  | -7.15512 | 5.809542 | 3.81E-11 | 1.76E-09 | 97   | 30   | 1    | 3929  | 6112   | 2810  |

|                    |          |          |          |          |      |      |     |        |        |       |
|--------------------|----------|----------|----------|----------|------|------|-----|--------|--------|-------|
| Solyc10g076190.1.1 | -7.1493  | 1.193628 | 2.54E-10 | 9.93E-09 | 5    | 0    | 0   | 57     | 305    | 163   |
| NCRNA_11_202       | -7.12675 | -2.36638 | 0.000291 | 0.002243 | 0    | 0    | 0   | 16     | 21     | 3     |
| Solyc11g051150.1.1 | -7.10916 | 3.904838 | 1.03E-18 | 1.40E-16 | 19   | 19   | 3   | 1952   | 973    | 394   |
| Solyc10g084550.1.1 | -7.09992 | -2.38526 | 0.000215 | 0.001726 | 0    | 0    | 0   | 10     | 25     | 5     |
| Solyc03g123690.1.1 | -7.09047 | 3.49923  | 9.68E-25 | 2.82E-22 | 15   | 13   | 3   | 1016   | 758    | 656   |
| Solyc06g065070.1.1 | -7.08966 | 0.425792 | 1.00E-09 | 3.39E-08 | 3    | 0    | 0   | 57     | 197    | 64    |
| Solyc10g078840.1.1 | -7.08959 | -0.35571 | 1.08E-05 | 0.000131 | 0    | 2    | 0   | 139    | 19     | 6     |
| Solyc02g068210.1.1 | -7.07523 | -2.43217 | 0.000201 | 0.001636 | 0    | 0    | 0   | 17     | 13     | 6     |
| Solyc06g083950.1.1 | -7.0718  | -2.44627 | 0.000157 | 0.001324 | 0    | 0    | 0   | 9      | 14     | 12    |
| Solyc01g087280.1.1 | -7.05069 | 4.267887 | 1.27E-15 | 1.19E-13 | 25   | 32   | 0   | 2038   | 1938   | 494   |
| Solyc08g068680.2.1 | -7.04195 | 9.063393 | 7.77E-21 | 1.45E-18 | 595  | 922  | 115 | 44060  | 51686  | 25252 |
| Solyc08g067640.1.1 | -7.03628 | 3.078134 | 1.19E-24 | 3.35E-22 | 6    | 7    | 11  | 701    | 539    | 552   |
| Solyc01g009480.2.1 | -7.02415 | 3.389704 | 8.44E-24 | 2.08E-21 | 4    | 29   | 3   | 868    | 831    | 594   |
| Solyc07g040670.1.1 | -7.02321 | -2.47565 | 0.000167 | 0.001395 | 0    | 0    | 0   | 10     | 16     | 9     |
| Solyc06g063430.1.1 | -7.01128 | -2.45108 | 0.000965 | 0.006152 | 0    | 0    | 0   | 15     | 22     | 1     |
| Solyc12g016070.1.1 | -7.00602 | 2.903801 | 7.35E-16 | 7.00E-14 | 0    | 23   | 4   | 754    | 363    | 448   |
| Solyc02g094110.1.1 | -6.99356 | -2.50209 | 0.000189 | 0.001557 | 0    | 0    | 0   | 12     | 14     | 8     |
| Solyc06g051090.1.1 | -6.99166 | 0.980396 | 5.48E-14 | 4.07E-12 | 0    | 4    | 2   | 132    | 154    | 137   |
| Solyc08g006740.2.1 | -6.98406 | 9.409157 | 6.04E-26 | 2.22E-23 | 901  | 538  | 446 | 49887  | 68610  | 35334 |
| Solyc03g036470.1.1 | -6.97566 | 3.980282 | 6.88E-34 | 5.28E-31 | 16   | 27   | 7   | 1179   | 1450   | 883   |
| Solyc07g063700.1.1 | -6.9547  | 2.737609 | 1.18E-18 | 1.60E-16 | 0    | 19   | 5   | 328    | 838    | 380   |
| Solyc06g069130.2.1 | -6.94969 | 6.56206  | 2.22E-24 | 6.00E-22 | 42   | 263  | 49  | 4518   | 10973  | 6041  |
| Solyc03g065120.1.1 | -6.94182 | -2.51298 | 0.000466 | 0.003328 | 0    | 0    | 0   | 11     | 22     | 3     |
| Solyc01g101170.2.1 | -6.93656 | 5.499872 | 1.52E-15 | 1.41E-13 | 27   | 52   | 64  | 7379   | 1130   | 1030  |
| Solyc01g109140.2.1 | -6.92377 | 10.61781 | 4.37E-21 | 8.57E-19 | 2331 | 1860 | 514 | 126582 | 141363 | 82344 |
| Solyc11g072870.1.1 | -6.90886 | -2.6108  | 0.00103  | 0.006497 | 0    | 0    | 0   | 3      | 9      | 17    |
| Solyc03g113120.2.1 | -6.89458 | 4.29846  | 4.49E-13 | 2.91E-11 | 43   | 4    | 4   | 973    | 2136   | 1314  |
| Solyc06g050140.1.1 | -6.85621 | 3.469383 | 1.65E-27 | 6.73E-25 | 5    | 28   | 8   | 601    | 1064   | 776   |
| Solyc06g066040.1.1 | -6.85471 | -2.62504 | 0.000357 | 0.002655 | 0    | 0    | 0   | 12     | 10     | 8     |
| Solyc05g007330.1.1 | -6.8459  | -2.61922 | 0.000345 | 0.002589 | 0    | 0    | 0   | 12     | 13     | 6     |
| Solyc07g056600.1.1 | -6.83972 | 3.690712 | 8.11E-18 | 9.96E-16 | 11   | 39   | 0   | 608    | 1201   | 1003  |
| Solyc07g040710.2.1 | -6.83842 | 7.070617 | 3.82E-17 | 4.32E-15 | 196  | 239  | 21  | 11528  | 10741  | 7242  |
| Solyc12g057080.1.1 | -6.82405 | 7.000414 | 2.14E-16 | 2.22E-14 | 206  | 164  | 41  | 16773  | 7368   | 3835  |
| Solyc04g011750.2.1 | -6.80389 | 6.677358 | 5.08E-12 | 2.75E-10 | 210  | 69   | 21  | 13723  | 4301   | 3725  |
| Solyc08g082780.1.1 | -6.78035 | -2.68279 | 0.000702 | 0.004711 | 0    | 0    | 0   | 4      | 14     | 11    |
| Solyc12g043030.1.1 | -6.77356 | 0.758393 | 1.03E-10 | 4.34E-09 | 0    | 4    | 2   | 48     | 289    | 77    |
| Solyc01g106990.1.1 | -6.76264 | -2.65225 | 0.001614 | 0.009495 | 0    | 0    | 0   | 12     | 19     | 1     |
| Solyc08g065710.1.1 | -6.7588  | 2.459352 | 9.18E-08 | 1.98E-06 | 15   | 0    | 0   | 810    | 159    | 180   |
| Solyc02g077290.1.1 | -6.73973 | 8.121786 | 1.63E-22 | 3.56E-20 | 448  | 396  | 116 | 18025  | 31295  | 14529 |
| Solyc01g009870.2.1 | -6.73833 | 2.048729 | 8.41E-19 | 1.17E-16 | 2    | 11   | 3   | 252    | 352    | 292   |
| Solyc05g010000.1.1 | -6.73385 | 4.495446 | 2.58E-24 | 6.92E-22 | 5    | 71   | 21  | 1140   | 2574   | 1412  |
| Solyc11g008950.1.1 | -6.73231 | 2.877819 | 1.07E-20 | 1.97E-18 | 12   | 4    | 8   | 425    | 618    | 542   |
| Solyc07g052070.1.1 | -6.71892 | -2.73983 | 0.000545 | 0.003793 | 0    | 0    | 0   | 7      | 10     | 10    |
| Solyc07g041940.2.1 | -6.71355 | 5.185533 | 3.57E-34 | 2.82E-31 | 43   | 65   | 28  | 1755   | 3294   | 2843  |
| Solyc07g056610.1.1 | -6.71179 | 1.612322 | 5.63E-15 | 4.84E-13 | 0    | 8    | 4   | 173    | 238    | 239   |
| Solyc03g042560.1.1 | -6.70945 | 5.594186 | 2.54E-17 | 2.93E-15 | 63   | 125  | 5   | 3488   | 4273   | 2889  |
| Solyc09g074220.1.1 | -6.703   | -2.73477 | 0.000517 | 0.003619 | 0    | 0    | 0   | 10     | 12     | 6     |
| Solyc04g024780.1.1 | -6.70189 | 5.549358 | 2.16E-35 | 2.13E-32 | 61   | 68   | 41  | 2836   | 4088   | 3275  |
| Solyc09g091670.2.1 | -6.67596 | 10.05829 | 4.87E-26 | 1.68E-23 | 1328 | 2327 | 562 | 68911  | 101903 | 65958 |
| Solyc11g018590.1.1 | -6.66957 | -2.7635  | 0.000835 | 0.005447 | 0    | 0    | 0   | 14     | 9      | 4     |
| Solyc05g050880.2.1 | -6.66587 | -1.41429 | 2.42E-05 | 0.000264 | 0    | 1    | 0   | 55     | 18     | 5     |
| Solyc03g098560.1.1 | -6.65931 | -0.73955 | 3.51E-06 | 4.91E-05 | 0    | 2    | 0   | 8      | 97     | 35    |
| Solyc08g005040.1.1 | -6.63737 | -0.76204 | 6.16E-07 | 1.08E-05 | 0    | 2    | 0   | 70     | 30     | 23    |
| Solyc08g061200.2.1 | -6.63438 | 0.382349 | 5.54E-11 | 2.47E-09 | 1    | 4    | 0   | 78     | 123    | 84    |
| Solyc03g118000.1.1 | -6.62783 | 7.049852 | 1.50E-10 | 6.07E-09 | 267  | 217  | 5   | 11765  | 11481  | 6264  |
| Solyc05g041190.1.1 | -6.62551 | -1.42356 | 2.05E-06 | 3.08E-05 | 0    | 1    | 0   | 27     | 45     | 11    |
| Solyc10g007580.1.1 | -6.62265 | 1.263769 | 4.38E-11 | 2.00E-09 | 0    | 11   | 0   | 91     | 287    | 165   |
| Solyc01g102910.2.1 | -6.6222  | 2.172999 | 3.04E-08 | 7.44E-07 | 0    | 20   | 2   | 33     | 484    | 457   |
| Solyc06g082430.1.1 | -6.61524 | -0.77667 | 3.72E-07 | 6.91E-06 | 0    | 2    | 0   | 19     | 65     | 43    |
| Solyc03g005890.1.1 | -6.60234 | 1.536608 | 5.24E-06 | 6.99E-05 | 7    | 0    | 2   | 10     | 741    | 49    |
| Solyc10g076220.1.1 | -6.5913  | 2.025037 | 1.86E-16 | 1.96E-14 | 3    | 6    | 7   | 151    | 388    | 341   |
| NCRNA_4_197        | -6.58618 | -2.80808 | 0.001372 | 0.006298 | 0    | 0    | 0   | 12     | 13     | 2     |
| Solyc03g031450.2.1 | -6.58332 | 0.637738 | 4.88E-09 | 1.44E-07 | 5    | 0    | 0   | 152    | 89     | 86    |
| Solyc09g090900.2.1 | -6.57957 | 5.540785 | 2.03E-18 | 2.66E-16 | 85   | 85   | 13  | 4694   | 2355   | 2711  |
| Solyc12g013610.1.1 | -6.57335 | -0.65977 | 1.35E-07 | 2.80E-06 | 0    | 0    | 2   | 45     | 37     | 47    |
| Solyc05g055370.1.1 | -6.56432 | 4.528356 | 2.54E-07 | 4.93E-06 | 68   | 4    | 0   | 2498   | 1450   | 1039  |
| Solyc04g025520.1.1 | -6.56202 | 4.018588 | 1.08E-08 | 2.98E-07 | 44   | 9    | 1   | 2426   | 512    | 475   |
| Solyc02g079840.1.1 | -6.53893 | -2.83361 | 0.001485 | 0.008868 | 0    | 0    | 0   | 9      | 16     | 2     |
| Solyc05g054650.1.1 | -6.52612 | 5.84724  | 4.80E-11 | 2.17E-09 | 154  | 39   | 6   | 4378   | 4634   | 3515  |
| Solyc08g069170.1.1 | -6.52537 | -0.91002 | 4.75E-05 | 0.000477 | 0    | 2    | 0   | 80     | 5      | 20    |
| Solyc01g105070.2.1 | -6.50033 | 9.535575 | 2.84E-23 | 6.50E-21 | 1021 | 1302 | 803 | 86100  | 37087  | 34272 |
| Solyc12g009370.1.1 | -6.49571 | -2.91352 | 0.001049 | 0.006592 | 0    | 0    | 0   | 9      | 7      | 7     |
| Solyc11g010210.1.1 | -6.48997 | 5.977595 | 7.10E-28 | 3.07E-25 | 102  | 67   | 80  | 3454   | 7183   | 3713  |
| Solyc04g072800.2.1 | -6.48176 | 7.261363 | 2.48E-32 | 1.57E-29 | 146  | 339  | 209 | 13145  | 13967  | 7226  |
| Solyc02g076910.2.1 | -6.45575 | 2.763033 | 1.28E-05 | 0.000151 | 8    | 26   | 0   | 71     | 1859   | 11    |
| Solyc02g077570.1.1 | -6.45029 | 4.556603 | 2.39E-09 | 7.45E-08 | 68   | 18   | 0   | 977    | 2835   | 1550  |
| Solyc03g044830.2.1 | -6.43789 | 2.256473 | 3.10E-17 | 3.54E-15 | 1    | 18   | 5   | 320    | 443    | 291   |
| Solyc09g011890.1.1 | -6.43508 | -1.63302 | 6.84E-06 | 8.79E-05 | 0    | 1    | 0   | 25     | 15     | 23    |
| Solyc12g099730.1.1 | -6.43164 | 6.554411 | 6.23E-11 | 2.74E-09 | 263  | 73   | 13  | 8815   | 7315   | 4516  |
| Solyc05g052870.2.1 | -6.43141 | 1.117155 | 6.14E-09 | 1.78E-07 | 5    | 4    | 0   | 317    | 86     | 57    |
| Solyc12g019630.1.1 | -6.42919 | 2.227765 | 1.28E-11 | 6.53E-10 | 14   | 4    | 0   | 438    | 416    | 193   |
| Solyc06g059880.2.1 | -6.42883 | -0.71833 | 1.64E-06 | 2.54E-05 | 2    | 0    | 0   | 62     | 29     | 33    |
| Solyc09g007890.1.1 | -6.42437 | 6.315286 | 7.35E-29 | 3.28E-26 | 131  | 161  | 63  | 6064   | 7266   | 4351  |
| Solyc07g056510.2.1 | -6.42063 | 7.658055 | 7.86E-12 | 4.17E-10 | 318  | 658  | 19  | 8164   | 24888  | 13181 |

|                    |          |          |          |          |      |      |      |        |        |       |
|--------------------|----------|----------|----------|----------|------|------|------|--------|--------|-------|
| Solyc03g111280.1.1 | -6.3967  | 1.309936 | 1.44E-09 | 4.69E-08 | 9    | 0    | 0    | 210    | 207    | 126   |
| Solyc11g006240.1.1 | -6.39013 | 3.517893 | 1.62E-08 | 4.28E-07 | 38   | 3    | 0    | 597    | 1326   | 684   |
| Solyc12g006280.1.1 | -6.38914 | 5.310091 | 2.57E-34 | 2.09E-31 | 54   | 100  | 36   | 3522   | 3203   | 1998  |
| Solyc09g066400.1.1 | -6.37678 | 8.794655 | 8.54E-05 | 0.00079  | 1511 | 17   | 3    | 51450  | 26819  | 17813 |
| Solyc07g008110.2.1 | -6.3735  | 6.507859 | 8.71E-30 | 4.54E-27 | 74   | 298  | 104  | 6641   | 9192   | 4689  |
| Solyc08g068730.1.1 | -6.36614 | 9.511734 | 1.59E-25 | 5.04E-23 | 1161 | 1786 | 548  | 59574  | 70987  | 34076 |
| Solyc01g102890.2.1 | -6.35975 | -0.07239 | 1.15E-07 | 2.41E-06 | 2    | 2    | 0    | 27     | 68     | 98    |
| Solyc07g005070.1.1 | -6.35792 | 1.289106 | 5.76E-12 | 3.11E-10 | 5    | 1    | 4    | 162    | 350    | 75    |
| Solyc01g095830.2.1 | -6.32792 | -1.70065 | 8.40E-06 | 0.000105 | 0    | 1    | 0    | 12     | 40     | 15    |
| Solyc07g062370.1.1 | -6.3204  | 4.878799 | 0.000108 | 0.000969 | 105  | 0    | 0    | 4637   | 980    | 636   |
| Solyc09g090390.1.1 | -6.31797 | -3.03454 | 0.001655 | 0.009694 | 0    | 0    | 0    | 8      | 8      | 5     |
| Solyc04g079240.2.1 | -6.31526 | 6.021939 | 1.65E-21 | 3.35E-19 | 127  | 152  | 34   | 6181   | 4403   | 3419  |
| Solyc06g072000.1.1 | -6.31083 | 0.806906 | 6.05E-11 | 2.66E-09 | 0    | 2    | 6    | 95     | 205    | 97    |
| Solyc08g066890.2.1 | -6.28258 | 6.199425 | 7.26E-25 | 2.18E-22 | 68   | 91   | 191  | 4571   | 7829   | 4185  |
| Solyc10g084110.1.1 | -6.28207 | 2.082097 | 2.25E-11 | 1.10E-09 | 14   | 4    | 0    | 230    | 453    | 264   |
| Solyc03g005040.1.1 | -6.26916 | 2.040435 | 3.32E-14 | 2.57E-12 | 11   | 3    | 4    | 241    | 551    | 177   |
| Solyc03g019690.1.1 | -6.26609 | 3.06714  | 9.20E-24 | 2.25E-21 | 10   | 28   | 7    | 541    | 853    | 482   |
| Solyc06g075570.1.1 | -6.25982 | -0.38376 | 7.69E-06 | 9.74E-05 | 0    | 4    | 0    | 119    | 18     | 20    |
| Solyc06g068830.1.1 | -6.25603 | 1.786839 | 4.10E-15 | 3.60E-13 | 7    | 8    | 2    | 204    | 257    | 267   |
| Solyc10g047810.1.1 | -6.25034 | -0.30412 | 2.07E-06 | 3.10E-05 | 0    | 3    | 1    | 7      | 111    | 64    |
| RRNA_11_20         | -6.23974 | 5.159426 | 6.68E-25 | 2.03E-22 | 66   | 82   | 33   | 1188   | 3936   | 2800  |
| Solyc07g066550.2.1 | -6.23443 | 8.059151 | 5.01E-13 | 3.21E-11 | 781  | 322  | 77   | 22094  | 21170  | 14885 |
| Solyc08g066880.2.1 | -6.227   | 7.928569 | 1.62E-26 | 5.97E-24 | 270  | 387  | 566  | 14065  | 24792  | 15421 |
| Solyc09g092600.2.1 | -6.22475 | 2.010843 | 2.65E-07 | 5.10E-06 | 10   | 7    | 2    | 30     | 1020   | 61    |
| Solyc03g096430.1.1 | -6.22282 | 0.72637  | 1.49E-08 | 3.95E-07 | 0    | 10   | 0    | 73     | 101    | 161   |
| Solyc09g098080.2.1 | -6.21724 | 6.302097 | 4.27E-08 | 1.00E-06 | 75   | 422  | 11   | 492    | 14502  | 4557  |
| Solyc04g011490.2.1 | -6.21687 | 2.312225 | 3.75E-09 | 1.13E-07 | 18   | 3    | 0    | 527    | 455    | 144   |
| Solyc07g052450.1.1 | -6.21651 | 1.487234 | 1.22E-09 | 4.05E-08 | 0    | 18   | 0    | 172    | 365    | 120   |
| Solyc04g080560.2.1 | -6.21224 | -1.18056 | 0.000267 | 0.002084 | 0    | 2    | 0    | 1      | 83     | 21    |
| Solyc04g076730.1.1 | -6.21194 | 6.662418 | 3.29E-07 | 6.17E-06 | 352  | 69   | 2    | 6942   | 10559  | 5371  |
| Solyc01g097060.2.1 | -6.21101 | 2.871765 | 3.00E-20 | 5.06E-18 | 10   | 9    | 17   | 659    | 702    | 292   |
| Solyc03g020010.1.1 | -6.19921 | 10.49919 | 1.65E-06 | 2.55E-05 | 5350 | 382  | 69   | 156514 | 104634 | 56821 |
| Solyc05g080930.1.1 | -6.19538 | 0.822656 | 2.27E-11 | 1.11E-09 | 4    | 5    | 0    | 100    | 166    | 119   |
| Solyc09g090480.2.1 | -6.18479 | -1.74242 | 0.000308 | 0.002348 | 0    | 0    | 1    | 41     | 7      | 10    |
| Solyc12g010990.1.1 | -6.16763 | -1.22318 | 8.04E-06 | 0.000101 | 0    | 2    | 0    | 42     | 17     | 26    |
| Solyc06g068890.1.1 | -6.15404 | 3.345023 | 1.01E-18 | 1.39E-16 | 3    | 49   | 13   | 599    | 895    | 711   |
| Solyc11g005840.1.1 | -6.15243 | 5.829243 | 4.74E-31 | 2.73E-28 | 102  | 142  | 65   | 3574   | 5646   | 3433  |
| Solyc08g066930.1.1 | -6.15075 | 3.064057 | 1.73E-23 | 4.13E-21 | 13   | 15   | 16   | 491    | 787    | 556   |
| Solyc11g072920.1.1 | -6.14461 | 4.17618  | 1.40E-11 | 7.11E-10 | 58   | 28   | 1    | 1020   | 1890   | 1129  |
| Solyc05g008210.2.1 | -6.14102 | 6.964343 | 1.10E-27 | 4.54E-25 | 233  | 317  | 133  | 9737   | 10247  | 7250  |
| Solyc11g072140.1.1 | -6.13041 | 2.180225 | 9.42E-12 | 4.92E-10 | 14   | 9    | 0    | 184    | 594    | 269   |
| Solyc01g005160.2.1 | -6.11798 | 3.446524 | 4.14E-12 | 2.28E-10 | 32   | 25   | 0    | 486    | 1275   | 706   |
| Solyc04g074780.2.1 | -6.11111 | 5.756031 | 2.07E-31 | 1.22E-28 | 94   | 100  | 96   | 4070   | 4926   | 2966  |
| Solyc04g071070.2.1 | -6.10909 | 7.663986 | 2.83E-11 | 1.34E-09 | 645  | 134  | 151  | 25149  | 7623   | 9380  |
| Solyc06g048870.1.1 | -6.1048  | -0.99947 | 2.67E-05 | 0.000288 | 2    | 0    | 0    | 9      | 60     | 39    |
| Solyc02g087070.2.1 | -6.10037 | 10.26948 | 7.87E-09 | 2.24E-07 | 4397 | 964  | 272  | 163513 | 55687  | 43198 |
| Solyc05g053960.2.1 | -6.09663 | 6.767888 | 3.07E-18 | 3.89E-16 | 290  | 147  | 109  | 8904   | 5844   | 7779  |
| Solyc02g085260.1.1 | -6.09193 | 0.706912 | 3.71E-05 | 0.000386 | 7    | 0    | 0    | 150    | 8      | 148   |
| Solyc09g011510.2.1 | -6.08572 | 3.257381 | 2.75E-07 | 5.27E-06 | 39   | 3    | 0    | 394    | 739    | 865   |
| Solyc01g097380.1.1 | -6.08545 | 4.230892 | 5.37E-13 | 3.44E-11 | 64   | 10   | 13   | 832    | 1618   | 1556  |
| Solyc11g007460.1.1 | -6.08507 | 1.711658 | 3.19E-12 | 1.80E-10 | 0    | 19   | 3    | 232    | 327    | 173   |
| Solyc08g014090.1.1 | -6.07438 | 1.60869  | 2.26E-14 | 1.81E-12 | 5    | 11   | 2    | 178    | 239    | 230   |
| Solyc10g076210.1.1 | -6.05886 | -0.05025 | 2.96E-08 | 7.27E-07 | 0    | 6    | 0    | 54     | 96     | 61    |
| Solyc10g006720.2.1 | -6.04156 | 3.116177 | 3.57E-10 | 1.34E-08 | 0    | 51   | 12   | 212    | 1188   | 602   |
| Solyc12g015700.1.1 | -6.03707 | -0.36092 | 2.03E-05 | 0.000227 | 0    | 5    | 0    | 6      | 51     | 96    |
| Solyc11g066140.1.1 | -6.03165 | 3.034239 | 2.42E-06 | 3.55E-05 | 36   | 0    | 0    | 827    | 804    | 241   |
| Solyc02g014560.2.1 | -6.03051 | 2.183643 | 2.57E-13 | 1.74E-11 | 0    | 16   | 13   | 342    | 299    | 314   |
| Solyc02g068460.1.1 | -6.0277  | 3.782435 | 1.13E-10 | 4.72E-09 | 35   | 48   | 0    | 455    | 1141   | 1291  |
| Solyc09g098160.2.1 | -6.01006 | 7.24755  | 5.75E-16 | 5.61E-14 | 483  | 167  | 126  | 10597  | 16042  | 7742  |
| Solyc07g056080.1.1 | -5.97781 | 4.42315  | 6.73E-31 | 3.79E-28 | 35   | 79   | 25   | 1196   | 2334   | 1294  |
| Solyc02g071130.2.1 | -5.96865 | 4.785741 | 1.51E-20 | 2.71E-18 | 81   | 62   | 16   | 2059   | 2708   | 1408  |
| Solyc04g016000.2.1 | -5.96404 | 7.576892 | 1.35E-18 | 1.81E-16 | 555  | 228  | 244  | 14098  | 16625  | 11116 |
| Solyc03g097410.1.1 | -5.96071 | 5.520352 | 1.50E-10 | 6.07E-09 | 161  | 54   | 26   | 6813   | 1534   | 1306  |
| Solyc05g009120.2.1 | -5.9449  | 7.348629 | 1.59E-20 | 2.82E-18 | 415  | 456  | 126  | 13155  | 15319  | 7920  |
| Solyc03g119240.2.1 | -5.92919 | 6.926185 | 6.74E-20 | 1.09E-17 | 284  | 431  | 75   | 8119   | 12020  | 6946  |
| Solyc09g005560.2.1 | -5.91603 | 4.466391 | 3.36E-24 | 8.83E-22 | 64   | 42   | 24   | 1446   | 2168   | 1293  |
| Solyc02g081890.2.1 | -5.90955 | 3.370289 | 1.19E-16 | 1.28E-14 | 13   | 28   | 26   | 209    | 1398   | 762   |
| Solyc11g067000.1.1 | -5.90336 | 3.549847 | 2.24E-12 | 1.30E-10 | 23   | 57   | 3    | 1486   | 859    | 265   |
| Solyc03g059050.2.1 | -5.89664 | 6.052692 | 9.90E-06 | 0.000121 | 301  | 28   | 1    | 7694   | 5188   | 1923  |
| Solyc06g050950.2.1 | -5.88845 | 1.413946 | 4.93E-12 | 2.68E-10 | 6    | 12   | 0    | 183    | 238    | 160   |
| Solyc10g050690.1.1 | -5.86321 | -0.01369 | 6.31E-06 | 8.22E-05 | 5    | 0    | 0    | 122    | 79     | 18    |
| Solyc03g083840.2.1 | -5.86194 | -1.23576 | 2.77E-05 | 0.000298 | 2    | 0    | 0    | 44     | 28     | 16    |
| Solyc02g067600.1.1 | -5.83306 | 4.177107 | 4.49E-19 | 6.53E-17 | 39   | 79   | 12   | 1933   | 1002   | 892   |
| Solyc06g068530.1.1 | -5.82351 | 0.84866  | 1.94E-09 | 6.20E-08 | 0    | 12   | 2    | 182    | 163    | 58    |
| Solyc06g076170.2.1 | -5.81309 | 0.890992 | 1.49E-07 | 3.04E-06 | 9    | 0    | 1    | 205    | 91     | 90    |
| Solyc08g014010.2.1 | -5.81244 | 7.260672 | 8.75E-25 | 2.60E-22 | 245  | 719  | 195  | 9704   | 16322  | 8485  |
| Solyc09g074350.1.1 | -5.7908  | 3.355126 | 1.86E-22 | 4.02E-20 | 13   | 46   | 18   | 847    | 660    | 650   |
| Solyc12g010670.1.1 | -5.78773 | 2.531746 | 7.08E-16 | 6.77E-14 | 3    | 26   | 15   | 260    | 538    | 449   |
| Solyc07g051950.2.1 | -5.78504 | 3.25274  | 6.87E-14 | 5.01E-12 | 37   | 8    | 11   | 571    | 759    | 637   |
| Solyc04g078660.1.1 | -5.7834  | 7.63099  | 2.95E-27 | 1.15E-24 | 337  | 800  | 335  | 15945  | 17616  | 10201 |
| Solyc08g068240.1.1 | -5.78316 | 0.167205 | 1.93E-08 | 4.99E-07 | 0    | 5    | 3    | 117    | 68     | 52    |
| Solyc09g065750.2.1 | -5.78069 | 1.851344 | 1.49E-10 | 6.07E-09 | 15   | 2    | 4    | 331    | 225    | 205   |
| Solyc10g083690.2.1 | -5.77324 | 10.64824 | 3.71E-17 | 4.22E-15 | 5349 | 3472 | 1457 | 130075 | 132717 | 87501 |
| Solyc04g054950.2.1 | -5.77242 | 8.366088 | 1.69E-10 | 6.75E-09 | 1346 | 508  | 127  | 37560  | 18326  | 14359 |



|                    |          |          |          |          |       |      |      |        |        |       |
|--------------------|----------|----------|----------|----------|-------|------|------|--------|--------|-------|
| Solyc11g068940.1.1 | -5.74734 | 6.13281  | 1.19E-16 | 1.28E-14 | 212   | 246  | 39   | 6471   | 5378   | 3427  |
| Solyc11g006030.1.1 | -5.74388 | 6.733828 | 2.27E-13 | 1.55E-11 | 400   | 246  | 45   | 7956   | 10964  | 5089  |
| Solyc03g036480.1.1 | -5.7302  | -1.19542 | 4.96E-06 | 6.67E-05 | 0     | 3    | 0    | 40     | 23     | 25    |
| Solyc09g008510.1.1 | -5.72402 | -0.95582 | 2.31E-05 | 0.000253 | 0     | 0    | 3    | 64     | 33     | 12    |
| Solyc08g077910.2.1 | -5.7239  | -0.86796 | 3.04E-06 | 4.33E-05 | 0     | 4    | 0    | 22     | 56     | 39    |
| Solyc06g005510.2.1 | -5.71522 | 0.703584 | 1.46E-10 | 5.97E-09 | 1     | 6    | 5    | 89     | 132    | 123   |
| Solyc01g106630.2.1 | -5.70612 | 1.417029 | 0.000956 | 0.006103 | 13    | 1    | 1    | 9      | 748    | 2     |
| Solyc07g055990.2.1 | -5.68949 | 1.271488 | 1.14E-11 | 5.87E-10 | 8     | 7    | 2    | 123    | 291    | 134   |
| Solyc04g025920.2.1 | -5.67961 | -0.26379 | 8.59E-08 | 1.87E-06 | 2     | 4    | 0    | 71     | 76     | 35    |
| Solyc06g073830.1.1 | -5.66191 | 3.77586  | 1.18E-21 | 2.41E-19 | 37    | 59   | 11   | 907    | 1344   | 784   |
| Solyc12g005720.1.1 | -5.66131 | 7.751914 | 2.15E-17 | 2.51E-15 | 354   | 1335 | 202  | 20866  | 13542  | 11411 |
| Solyc02g092890.1.1 | -5.65421 | 6.398206 | 2.96E-07 | 5.61E-06 | 387   | 164  | 3    | 5050   | 8355   | 5230  |
| Solyc01g094260.2.1 | -5.65128 | 4.004037 | 3.16E-15 | 2.84E-13 | 57    | 27   | 25   | 2018   | 898    | 531   |
| Solyc01g073860.2.1 | -5.64122 | 2.121425 | 6.03E-08 | 1.37E-06 | 22    | 6    | 0    | 458    | 202    | 239   |
| Solyc11g069220.1.1 | -5.64059 | 2.9153   | 4.71E-13 | 3.03E-11 | 7     | 51   | 10   | 949    | 513    | 196   |
| Solyc04g017740.1.1 | -5.62825 | 2.084354 | 9.56E-05 | 0.000869 | 24    | 1    | 0    | 65     | 120    | 590   |
| Solyc10g086710.1.1 | -5.62018 | 3.979584 | 1.24E-17 | 1.48E-15 | 43    | 55   | 24   | 367    | 1910   | 1244  |
| Solyc07g042400.2.1 | -5.61678 | 0.012498 | 2.79E-07 | 5.34E-06 | 0     | 5    | 3    | 42     | 174    | 30    |
| Solyc04g064880.2.1 | -5.60674 | 10.92138 | 6.99E-08 | 1.56E-06 | 10001 | 1801 | 391  | 181233 | 163270 | 83779 |
| Solyc01g057080.1.1 | -5.60525 | -0.94789 | 8.52E-05 | 0.000788 | 3     | 0    | 0    | 9      | 61     | 41    |
| Solyc01g109320.2.1 | -5.59634 | 5.546862 | 3.31E-14 | 2.57E-12 | 62    | 312  | 61   | 831    | 5051   | 4252  |
| Solyc09g065740.1.1 | -5.5851  | 1.086824 | 1.13E-07 | 2.38E-06 | 7     | 10   | 0    | 285    | 63     | 86    |
| Solyc05g046110.2.1 | -5.57233 | 2.849018 | 7.99E-11 | 3.43E-09 | 34    | 12   | 4    | 750    | 647    | 221   |
| Solyc08g068600.2.1 | -5.55747 | 8.42705  | 3.04E-17 | 3.49E-15 | 908   | 1844 | 257  | 23462  | 35615  | 18072 |
| Solyc03g082470.2.1 | -5.54842 | 4.703019 | 1.06E-23 | 2.57E-21 | 37    | 152  | 50   | 2587   | 1621   | 1326  |
| Solyc04g072620.1.1 | -5.54717 | 3.809567 | 1.29E-13 | 9.08E-12 | 60    | 23   | 17   | 508    | 1081   | 1312  |
| Solyc07g063730.1.1 | -5.54578 | 5.965901 | 3.31E-21 | 6.57E-19 | 53    | 363  | 169  | 3490   | 6335   | 3983  |
| Solyc10g083890.1.1 | -5.54401 | 3.002834 | 4.35E-07 | 7.91E-06 | 40    | 17   | 0    | 1135   | 365    | 207   |
| Solyc05g025670.1.1 | -5.54067 | -2.26487 | 0.00095  | 0.006076 | 1     | 0    | 0    | 21     | 6      | 11    |
| Solyc02g067770.2.1 | -5.53076 | 0.779278 | 1.98E-09 | 6.29E-08 | 2     | 2    | 9    | 92     | 210    | 88    |
| Solyc05g005160.2.1 | -5.52167 | 10.16393 | 7.15E-21 | 1.34E-18 | 3559  | 3616 | 2020 | 105615 | 89371  | 54785 |
| Solyc12g100260.1.1 | -5.52145 | 6.876539 | 1.00E-09 | 3.39E-08 | 336   | 720  | 19   | 9363   | 6721   | 8200  |
| Solyc11g007450.1.1 | -5.51139 | 2.91257  | 9.71E-18 | 1.17E-15 | 12    | 30   | 23   | 269    | 836    | 558   |
| Solyc05g056080.2.1 | -5.50576 | 6.06919  | 2.55E-21 | 5.11E-19 | 151   | 396  | 76   | 5401   | 6270   | 3236  |
| Solyc10g050880.1.1 | -5.4898  | 6.388186 | 4.28E-10 | 1.57E-08 | 311   | 394  | 15   | 3916   | 9203   | 5532  |
| Solyc11g011330.1.1 | -5.4723  | 5.55341  | 9.54E-08 | 2.05E-06 | 275   | 23   | 15   | 3491   | 4202   | 2597  |
| Solyc09g075820.2.1 | -5.47185 | 9.94707  | 2.12E-23 | 4.96E-21 | 2340  | 4950 | 1720 | 73709  | 98892  | 48276 |
| Solyc12g100250.1.1 | -5.4602  | 7.438901 | 5.98E-09 | 1.74E-07 | 554   | 1052 | 20   | 11826  | 14560  | 11031 |
| Solyc10g007880.2.1 | -5.4589  | 7.043469 | 1.39E-19 | 2.16E-17 | 231   | 665  | 337  | 3860   | 15815  | 9819  |
| Solyc12g005710.1.1 | -5.44633 | -1.87725 | 7.76E-05 | 0.000728 | 0     | 2    | 0    | 15     | 21     | 18    |
| Solyc12g006130.1.1 | -5.44538 | -0.82698 | 0.000215 | 0.001731 | 0     | 0    | 4    | 6      | 108    | 22    |
| Solyc10g085860.1.1 | -5.44346 | 4.26385  | 6.32E-20 | 1.03E-17 | 69    | 77   | 20   | 953    | 2182   | 1178  |
| Solyc05g054380.1.1 | -5.43934 | 8.813065 | 5.39E-22 | 1.13E-19 | 1468  | 1380 | 923  | 34057  | 44892  | 21670 |
| Solyc05g008220.2.1 | -5.43126 | 7.348198 | 2.49E-19 | 3.74E-17 | 594   | 561  | 226  | 12743  | 12840  | 9494  |
| Solyc08g065540.2.1 | -5.42847 | 0.412298 | 1.15E-07 | 2.42E-06 | 4     | 8    | 0    | 42     | 207    | 65    |
| Solyc09g014910.2.1 | -5.4235  | 4.889315 | 1.01E-05 | 0.000123 | 182   | 25   | 0    | 1550   | 3811   | 1495  |
| Solyc11g068370.1.1 | -5.41334 | 3.365186 | 2.08E-08 | 5.34E-07 | 61    | 12   | 2    | 750    | 863    | 613   |
| Solyc03g114500.2.1 | -5.41308 | 8.870095 | 8.26E-24 | 2.06E-21 | 1317  | 1889 | 999  | 38533  | 39788  | 23983 |
| Solyc03g007890.2.1 | -5.41171 | 4.134575 | 7.45E-15 | 6.27E-13 | 70    | 67   | 15   | 1439   | 742    | 1339  |
| Solyc10g012090.1.1 | -5.40859 | -0.20302 | 7.62E-06 | 9.65E-05 | 6     | 0    | 0    | 75     | 79     | 35    |
| Solyc01g007960.2.1 | -5.40738 | 5.22176  | 4.76E-20 | 7.83E-18 | 57    | 284  | 53   | 1685   | 4300   | 2389  |
| Solyc06g074140.1.1 | -5.37992 | 7.874475 | 3.20E-18 | 4.04E-16 | 906   | 864  | 294  | 16863  | 22775  | 12379 |
| Solyc10g054350.1.1 | -5.37973 | 0.316444 | 9.26E-08 | 1.99E-06 | 0     | 11   | 2    | 56     | 107    | 99    |
| Solyc01g005390.2.1 | -5.37483 | 3.232096 | 2.25E-09 | 7.06E-08 | 54    | 8    | 8    | 922    | 514    | 522   |
| Solyc07g056690.1.1 | -5.36474 | -0.95787 | 9.54E-06 | 0.000117 | 0     | 5    | 0    | 53     | 33     | 21    |
| Solyc01g006580.2.1 | -5.3619  | -0.64951 | 9.91E-06 | 0.000121 | 0     | 0    | 5    | 47     | 62     | 29    |
| Solyc03g026370.1.1 | -5.3595  | 6.261404 | 3.20E-19 | 4.71E-17 | 214   | 416  | 121  | 8410   | 5105   | 3035  |
| Solyc01g098140.2.1 | -5.35    | 6.03534  | 3.31E-16 | 3.32E-14 | 284   | 224  | 67   | 5904   | 5005   | 3269  |
| Solyc01g098850.2.1 | -5.34794 | 3.310303 | 3.94E-18 | 4.95E-16 | 29    | 51   | 16   | 950    | 562    | 559   |
| Solyc12g100270.1.1 | -5.34542 | 8.324696 | 9.37E-10 | 3.19E-08 | 1203  | 1867 | 70   | 25665  | 23226  | 19308 |
| Solyc06g076070.1.1 | -5.33944 | 4.123267 | 5.67E-21 | 1.09E-18 | 59    | 68   | 34   | 1744   | 992    | 919   |
| Solyc12g056590.1.1 | -5.31916 | 8.592944 | 1.81E-23 | 4.28E-21 | 1219  | 1525 | 890  | 25145  | 38847  | 21631 |
| Solyc10g008150.1.1 | -5.31852 | 2.694697 | 4.48E-09 | 1.33E-07 | 39    | 11   | 2    | 425    | 544    | 419   |
| Solyc04g080530.2.1 | -5.31811 | 1.673774 | 6.71E-08 | 1.51E-06 | 0     | 14   | 18   | 385    | 254    | 70    |
| Solyc12g099130.1.1 | -5.31405 | 0.939225 | 4.76E-06 | 6.43E-05 | 14    | 0    | 0    | 116    | 173    | 123   |
| Solyc08g078650.2.1 | -5.30819 | 7.241886 | 8.31E-12 | 4.38E-10 | 730   | 553  | 75   | 9593   | 16317  | 8058  |
| Solyc09g011550.2.1 | -5.30436 | 6.614583 | 2.14E-18 | 2.77E-16 | 407   | 348  | 139  | 6570   | 8126   | 6331  |
| Solyc04g040090.2.1 | -5.29405 | 2.351169 | 4.64E-15 | 4.04E-13 | 18    | 19   | 11   | 234    | 523    | 357   |
| Solyc03g116700.2.1 | -5.29354 | 9.025648 | 1.26E-18 | 1.69E-16 | 1660  | 3005 | 659  | 37553  | 44056  | 31062 |
| Solyc05g056170.2.1 | -5.29003 | 9.593734 | 2.60E-23 | 5.99E-21 | 2414  | 3030 | 1960 | 54085  | 78843  | 39518 |
| Solyc05g005700.2.1 | -5.27734 | 6.873962 | 6.02E-25 | 1.85E-22 | 362   | 487  | 295  | 8673   | 10771  | 6307  |
| Solyc01g108350.2.1 | -5.26527 | 3.029563 | 1.06E-09 | 3.58E-08 | 3     | 91   | 10   | 840    | 592    | 336   |
| Solyc09g014610.2.1 | -5.2634  | 0.27305  | 5.82E-06 | 7.67E-05 | 0     | 5    | 7    | 179    | 44     | 28    |
| Solyc04g011740.2.1 | -5.24288 | 1.537405 | 5.35E-10 | 1.93E-08 | 10    | 4    | 12   | 329    | 205    | 95    |
| Solyc03g116510.1.1 | -5.24085 | 7.026655 | 2.67E-16 | 2.73E-14 | 566   | 522  | 167  | 12223  | 9112   | 6550  |
| Solyc06g063350.1.1 | -5.23225 | 1.388241 | 3.98E-12 | 2.20E-10 | 8     | 11   | 7    | 235    | 236    | 106   |
| Solyc09g014220.2.1 | -5.21179 | -0.38713 | 1.92E-05 | 0.000215 | 6     | 0    | 0    | 53     | 74     | 38    |
| Solyc07g052140.2.1 | -5.20849 | 8.706351 | 1.40E-19 | 2.16E-17 | 1144  | 2180 | 1124 | 17051  | 33495  | 36459 |
| Solyc01g097560.1.1 | -5.20275 | -1.04937 | 1.54E-05 | 0.000178 | 1     | 0    | 3    | 36     | 57     | 14    |
| Solyc01g057470.1.1 | -5.20193 | 1.148895 | 0.000129 | 0.001123 | 16    | 2    | 0    | 355    | 103    | 18    |
| Solyc07g040900.1.1 | -5.19891 | -0.40816 | 4.99E-06 | 6.70E-05 | 4     | 3    | 0    | 87     | 38     | 30    |
| Solyc07g007070.1.1 | -5.18195 | -0.39595 | 4.49E-05 | 0.000455 | 6     | 0    | 0    | 43     | 109    | 24    |
| Solyc06g076300.2.1 | -5.17265 | 5.534657 | 2.11E-25 | 6.63E-23 | 79    | 246  | 191  | 2554   | 4470   | 3065  |
| Solyc01g049830.2.1 | -5.16977 | -0.65552 | 0.000126 | 0.0011   | 5     | 0    | 0    | 66     | 62     | 12    |

|                    |          |          |          |          |      |      |      |        |        |       |
|--------------------|----------|----------|----------|----------|------|------|------|--------|--------|-------|
| Solyc03g096540.2.1 | -5.16441 | 7.090802 | 0.00073  | 0.004871 | 1042 | 42   | 3    | 23069  | 2597   | 2445  |
| Solyc06g060240.1.1 | -5.16161 | -1.39861 | 4.03E-05 | 0.000415 | 0    | 4    | 0    | 26     | 31     | 21    |
| Solyc02g083730.2.1 | -5.15621 | -1.03704 | 4.70E-05 | 0.000473 | 3    | 0    | 1    | 16     | 53     | 34    |
| Solyc08g068610.2.1 | -5.14808 | 7.269495 | 1.55E-12 | 9.14E-11 | 766  | 724  | 102  | 11832  | 13515  | 8270  |
| Solyc01g016380.2.1 | -5.12618 | -2.6311  | 0.0016   | 0.009432 | 0    | 0    | 1    | 11     | 13     | 6     |
| Solyc02g088840.2.1 | -5.11957 | -2.75833 | 0.000591 | 0.004061 | 0    | 1    | 0    | 8      | 9      | 9     |
| Solyc11g073080.1.1 | -5.11855 | 4.174674 | 1.38E-26 | 5.24E-24 | 56   | 91   | 53   | 1000   | 1895   | 1096  |
| Solyc07g006670.1.1 | -5.11636 | -0.20933 | 4.17E-07 | 7.62E-06 | 0    | 7    | 3    | 46     | 96     | 48    |
| Solyc01g073720.2.1 | -5.11257 | 5.091975 | 7.70E-20 | 1.23E-17 | 157  | 93   | 90   | 2066   | 2547   | 2524  |
| Solyc02g062030.1.1 | -5.10599 | -1.96969 | 0.000233 | 0.001853 | 0    | 0    | 2    | 12     | 33     | 9     |
| Solyc04g078450.2.1 | -5.08588 | 2.79     | 1.22E-17 | 1.46E-15 | 20   | 44   | 17   | 440    | 801    | 327   |
| Solyc01g073670.2.1 | -5.08345 | 2.769954 | 2.04E-12 | 1.19E-10 | 37   | 14   | 16   | 650    | 445    | 346   |
| Solyc01g108360.2.1 | -5.07971 | 3.239522 | 6.03E-12 | 3.24E-10 | 10   | 107  | 14   | 933    | 800    | 348   |
| Solyc11g007970.1.1 | -5.07667 | 1.509521 | 5.47E-06 | 7.26E-05 | 0    | 40   | 2    | 75     | 413    | 171   |
| Solyc10g076510.1.1 | -5.07643 | 10.05887 | 4.08E-12 | 2.25E-10 | 6387 | 2900 | 1208 | 80585  | 102772 | 52532 |
| Solyc09g007910.2.1 | -5.07401 | 10.11887 | 2.18E-18 | 2.79E-16 | 3000 | 7634 | 2876 | 118094 | 77722  | 44009 |
| Solyc03g097840.2.1 | -5.07331 | 9.282612 | 4.11E-21 | 8.12E-19 | 2368 | 3104 | 1508 | 39229  | 64828  | 34246 |
| Solyc01g099660.2.1 | -5.06897 | 6.269428 | 3.61E-10 | 1.35E-08 | 456  | 107  | 165  | 8898   | 6798   | 1661  |
| Solyc11g007470.1.1 | -5.05347 | 3.993948 | 1.65E-20 | 2.91E-18 | 42   | 92   | 55   | 547    | 2037   | 1025  |
| Solyc05g055270.1.1 | -5.05055 | 1.497594 | 5.10E-07 | 9.15E-06 | 1    | 3    | 26   | 125    | 291    | 197   |
| Solyc04g079910.2.1 | -5.04413 | 3.153678 | 3.50E-12 | 1.96E-10 | 39   | 14   | 37   | 371    | 1421   | 352   |
| Solyc07g052150.2.1 | -5.03918 | 6.454431 | 4.76E-21 | 9.27E-19 | 264  | 562  | 239  | 4163   | 7171   | 7050  |
| NCRNA_6_228        | -5.0324  | -0.08674 | 3.67E-06 | 5.11E-05 | 0    | 9    | 3    | 115    | 54     | 29    |
| Solyc04g015430.2.1 | -5.03224 | 3.809988 | 3.22E-10 | 1.23E-08 | 90   | 16   | 28   | 1514   | 730    | 675   |
| Solyc09g014720.1.1 | -5.02957 | 3.38725  | 1.90E-14 | 1.54E-12 | 34   | 92   | 9    | 787    | 841    | 611   |
| Solyc01g106510.2.1 | -5.02701 | 5.885034 | 6.19E-26 | 2.09E-23 | 143  | 369  | 215  | 4047   | 5994   | 3065  |
| Solyc03g116070.1.1 | -5.0263  | -2.23137 | 0.000339 | 0.00255  | 0    | 2    | 0    | 14     | 19     | 9     |
| Solyc01g005800.2.1 | -5.01618 | 3.775345 | 2.28E-08 | 5.79E-07 | 92   | 35   | 11   | 260    | 1105   | 1424  |
| Solyc03g111510.2.1 | -5.01405 | 4.869866 | 3.35E-20 | 5.58E-18 | 146  | 99   | 71   | 1884   | 3368   | 1376  |
| Solyc08g080290.2.1 | -5.00408 | 0.967073 | 3.65E-09 | 1.10E-07 | 4    | 20   | 2    | 152    | 147    | 114   |
| Solyc12g100240.1.1 | -4.99507 | 3.982476 | 3.58E-07 | 6.68E-06 | 87   | 100  | 0    | 1063   | 985    | 1190  |
| Solyc02g062320.2.1 | -4.99203 | -0.85021 | 0.000257 | 0.002016 | 0    | 2    | 4    | 57     | 66     | 3     |
| Solyc01g106510.2.1 | -4.99135 | 1.19856  | 7.10E-08 | 1.58E-06 | 11   | 7    | 7    | 142    | 60     | 230   |
| Solyc04g074360.1.1 | -4.99131 | -0.81076 | 8.24E-05 | 0.000767 | 3    | 3    | 0    | 16     | 111    | 12    |
| Solyc07g065160.2.1 | -4.98897 | 2.676243 | 1.49E-15 | 1.39E-13 | 20   | 47   | 14   | 554    | 621    | 249   |
| Solyc07g008690.2.1 | -4.98574 | 4.736118 | 1.02E-24 | 2.95E-22 | 98   | 155  | 71   | 1443   | 2302   | 1920  |
| Solyc05g005090.2.1 | -4.97464 | -1.50911 | 0.000372 | 0.002752 | 0    | 3    | 1    | 48     | 20     | 4     |
| Solyc03g058890.2.1 | -4.97306 | 2.408267 | 1.66E-14 | 1.35E-12 | 21   | 36   | 9    | 380    | 511    | 274   |
| Solyc10g045100.1.1 | -4.97234 | -0.81906 | 6.75E-05 | 0.000645 | 0    | 5    | 2    | 69     | 47     | 7     |
| Solyc04g007620.1.1 | -4.97183 | 2.678558 | 3.03E-17 | 3.48E-15 | 18   | 43   | 20   | 406    | 690    | 331   |
| Solyc04g078460.2.1 | -4.94299 | 8.374887 | 2.50E-12 | 1.43E-10 | 2149 | 740  | 601  | 24332  | 28959  | 18551 |
| Solyc08g007230.1.1 | -4.94181 | 3.556119 | 1.47E-08 | 3.94E-07 | 89   | 22   | 9    | 1266   | 638    | 550   |
| Solyc06g050540.1.1 | -4.9359  | -1.54974 | 9.48E-05 | 0.000863 | 0    | 3    | 1    | 11     | 26     | 30    |
| Solyc01g049820.2.1 | -4.93548 | 1.244256 | 2.38E-09 | 7.44E-08 | 9    | 10   | 9    | 240    | 247    | 51    |
| Solyc02g076830.1.1 | -4.92324 | 1.603139 | 2.79E-08 | 6.90E-07 | 0    | 24   | 18   | 278    | 234    | 140   |
| Solyc09g011520.2.1 | -4.92314 | 5.115381 | 4.06E-06 | 5.58E-05 | 286  | 60   | 3    | 1862   | 3585   | 2160  |
| Solyc08g068630.2.1 | -4.9227  | -0.54036 | 1.34E-06 | 2.14E-05 | 1    | 3    | 4    | 45     | 87     | 23    |
| Solyc11g010860.1.1 | -4.91834 | 0.371363 | 0.00037  | 0.002742 | 12   | 0    | 0    | 17     | 235    | 60    |
| Solyc09g089910.1.1 | -4.91006 | 5.852703 | 2.21E-24 | 6.00E-22 | 199  | 390  | 169  | 4207   | 5281   | 3105  |
| Solyc07g048070.2.1 | -4.90835 | 7.376216 | 4.65E-10 | 1.70E-08 | 868  | 1170 | 92   | 6306   | 20591  | 10516 |
| Solyc09g075870.1.1 | -4.90017 | 2.809779 | 3.09E-09 | 9.44E-08 | 30   | 57   | 7    | 973    | 327    | 179   |
| Solyc12g062940.1.1 | -4.89715 | 3.654546 | 1.57E-12 | 9.29E-11 | 86   | 28   | 23   | 758    | 1186   | 782   |
| Solyc08g036660.2.1 | -4.87545 | 4.331288 | 1.17E-18 | 1.59E-16 | 82   | 57   | 100  | 1481   | 1294   | 1380  |
| Solyc03g094020.2.1 | -4.86914 | 1.141645 | 4.78E-08 | 1.11E-06 | 12   | 1    | 11   | 134    | 230    | 120   |
| Solyc08g007790.2.1 | -4.86889 | 9.578479 | 2.18E-18 | 2.79E-16 | 2629 | 4028 | 3217 | 79421  | 52402  | 31749 |
| Solyc03g115610.2.1 | -4.86277 | 7.470911 | 8.01E-12 | 4.22E-10 | 1181 | 707  | 193  | 11677  | 18204  | 9362  |
| Solyc02g094180.2.1 | -4.85353 | 2.439526 | 1.69E-11 | 8.45E-10 | 26   | 35   | 10   | 160    | 639    | 396   |
| Solyc06g072880.1.1 | -4.84857 | -2.95866 | 0.001585 | 0.009356 | 0    | 1    | 0    | 4      | 10     | 8     |
| Solyc10g055740.1.1 | -4.848   | 3.627345 | 4.93E-19 | 7.13E-17 | 32   | 96   | 46   | 501    | 1409   | 822   |
| Solyc02g090490.2.1 | -4.84565 | 9.073128 | 1.43E-18 | 1.91E-16 | 1500 | 4695 | 1619 | 48090  | 36959  | 28694 |
| Solyc01g006950.2.1 | -4.84476 | 8.246153 | 4.51E-18 | 5.60E-16 | 1245 | 2351 | 608  | 20585  | 30823  | 15709 |
| Solyc12g008960.1.1 | -4.84142 | 7.988749 | 3.22E-20 | 5.40E-18 | 752  | 2189 | 732  | 15549  | 26928  | 13840 |
| Solyc04g058170.1.1 | -4.83532 | 3.864772 | 2.25E-17 | 2.62E-15 | 71   | 99   | 25   | 738    | 1587   | 891   |
| Solyc11g072930.1.1 | -4.83396 | 2.195444 | 1.30E-09 | 4.27E-08 | 8    | 62   | 4    | 305    | 446    | 250   |
| Solyc01g080010.2.1 | -4.83214 | 8.0899   | 9.59E-07 | 1.59E-05 | 2299 | 494  | 138  | 34346  | 13685  | 9238  |
| Solyc10g038080.1.1 | -4.83016 | 7.325631 | 5.39E-19 | 7.67E-17 | 326  | 1175 | 793  | 14094  | 13925  | 7033  |
| Solyc01g009320.1.1 | -4.82748 | 3.491462 | 3.39E-06 | 4.76E-05 | 102  | 14   | 2    | 819    | 993    | 618   |
| Solyc02g080090.1.1 | -4.82609 | 3.264404 | 1.47E-06 | 2.31E-05 | 72   | 36   | 5    | 1477   | 252    | 240   |
| Solyc03g096650.1.1 | -4.81928 | 1.934882 | 5.00E-11 | 2.25E-09 | 7    | 18   | 26   | 164    | 329    | 307   |
| Solyc02g079440.1.1 | -4.81665 | 8.056783 | 2.94E-07 | 5.59E-06 | 2291 | 368  | 187  | 27108  | 20660  | 10058 |
| NCRNA_9_219        | -4.80198 | -1.68333 | 0.000559 | 0.00387  | 3    | 0    | 0    | 17     | 29     | 17    |
| Solyc08g007780.2.1 | -4.79996 | 1.754323 | 1.28E-08 | 3.47E-07 | 23   | 9    | 8    | 390    | 227    | 106   |
| Solyc10g081970.1.1 | -4.79681 | 7.486229 | 1.33E-18 | 1.78E-16 | 480  | 1778 | 496  | 11518  | 17980  | 9890  |
| Solyc05g054890.2.1 | -4.79406 | 4.520356 | 1.97E-22 | 4.23E-20 | 95   | 165  | 62   | 1667   | 2584   | 942   |
| Solyc02g068470.1.1 | -4.7925  | 4.649227 | 2.25E-05 | 0.000247 | 211  | 80   | 0    | 1116   | 2340   | 1887  |
| Solyc11g066890.1.1 | -4.78222 | 7.262984 | 4.22E-20 | 6.98E-18 | 433  | 899  | 815  | 13399  | 11650  | 7756  |
| Solyc12g096920.1.1 | -4.78065 | 4.273071 | 1.19E-23 | 2.86E-21 | 53   | 168  | 68   | 1219   | 1766   | 1182  |
| Solyc09g056290.1.1 | -4.77204 | -2.43714 | 0.000873 | 0.00566  | 0    | 2    | 0    | 10     | 19     | 7     |
| Solyc09g011540.2.1 | -4.77126 | 3.919892 | 2.05E-06 | 3.08E-05 | 137  | 25   | 6    | 1386   | 483    | 1093  |
| Solyc03g025490.2.1 | -4.7681  | -2.04562 | 0.000452 | 0.003251 | 0    | 3    | 0    | 16     | 30     | 5     |
| Solyc09g091000.2.1 | -4.75454 | 5.727216 | 1.50E-07 | 3.05E-06 | 249  | 554  | 14   | 6373   | 2267   | 2254  |
| Solyc08g074710.1.1 | -4.75255 | -0.48783 | 0.000249 | 0.00196  | 5    | 4    | 0    | 6      | 78     | 65    |
| Solyc03g116440.1.1 | -4.74612 | 2.100518 | 4.21E-12 | 2.31E-10 | 10   | 28   | 24   | 395    | 225    | 255   |
| Solyc03g096660.1.1 | -4.74447 | 3.040545 | 6.42E-13 | 4.05E-11 | 11   | 76   | 42   | 320    | 734    | 673   |

|                    |          |          |          |          |       |       |      |        |        |        |
|--------------------|----------|----------|----------|----------|-------|-------|------|--------|--------|--------|
| Solyc08g068390.2.1 | -4.74426 | 9.584049 | 1.82E-19 | 2.78E-17 | 2034  | 6723  | 3062 | 61850  | 64524  | 39158  |
| Solyc04g007390.2.1 | -4.73678 | 5.615632 | 1.07E-13 | 7.63E-12 | 346   | 191   | 84   | 4071   | 3989   | 2476   |
| Solyc04g011480.2.1 | -4.73316 | 2.555975 | 8.11E-09 | 2.30E-07 | 43    | 30    | 4    | 590    | 487    | 206    |
| Solyc08g023510.1.1 | -4.7248  | 6.977975 | 6.08E-10 | 2.17E-08 | 947   | 586   | 95   | 8668   | 12258  | 6672   |
| Solyc06g065550.1.1 | -4.71874 | -0.76083 | 4.12E-05 | 0.000422 | 0     | 3     | 5    | 67     | 39     | 17     |
| Solyc09g090970.2.1 | -4.71846 | 5.531908 | 7.50E-07 | 1.28E-05 | 374   | 188   | 22   | 6700   | 1559   | 1281   |
| Solyc11g011500.1.1 | -4.71587 | 2.741248 | 3.51E-12 | 1.96E-10 | 45    | 32    | 12   | 492    | 518    | 401    |
| Solyc02g092120.2.1 | -4.71306 | 4.423453 | 1.08E-20 | 1.97E-18 | 117   | 103   | 72   | 1645   | 1680   | 1229   |
| Solyc12g056960.1.1 | -4.71055 | 7.265834 | 1.43E-14 | 1.17E-12 | 894   | 703   | 468  | 16164  | 8717   | 7205   |
| Solyc10g079380.1.1 | -4.70109 | -2.32695 | 0.000787 | 0.005192 | 0     | 0     | 2    | 16     | 15     | 7      |
| Solyc11g007390.1.1 | -4.69821 | 5.446152 | 8.08E-19 | 1.13E-16 | 225   | 255   | 137  | 1670   | 5407   | 2706   |
| Solyc07g053420.2.1 | -4.69684 | 4.777888 | 6.65E-19 | 9.43E-17 | 115   | 261   | 54   | 1667   | 3235   | 1297   |
| Solyc01g102680.2.1 | -4.68978 | 4.196804 | 1.17E-20 | 2.11E-18 | 101   | 99    | 57   | 1192   | 1816   | 1002   |
| Solyc05g053620.2.1 | -4.68222 | -0.21795 | 2.16E-05 | 0.000239 | 7     | 0     | 3    | 27     | 104    | 56     |
| Solyc04g005050.1.1 | -4.682   | 8.752775 | 1.11E-16 | 1.20E-14 | 1965  | 3814  | 915  | 28615  | 41317  | 23977  |
| Solyc09g011590.2.1 | -4.68117 | 9.831865 | 9.34E-14 | 6.74E-12 | 4944  | 7487  | 1322 | 62219  | 85780  | 50093  |
| Solyc10g076680.1.1 | -4.67951 | 3.395776 | 1.35E-05 | 0.000159 | 107   | 5     | 6    | 974    | 1004   | 359    |
| Solyc09g008740.1.1 | -4.66666 | 4.192401 | 9.80E-22 | 2.02E-19 | 49    | 142   | 95   | 1549   | 1740   | 745    |
| Solyc10g076670.1.1 | -4.66639 | 5.10991  | 3.56E-07 | 6.64E-06 | 333   | 48    | 25   | 3274   | 3159   | 1199   |
| Solyc12g006840.1.1 | -4.65955 | 7.000313 | 4.46E-16 | 4.42E-14 | 513   | 1346  | 247  | 8502   | 13087  | 6618   |
| Solyc03g006700.2.1 | -4.65564 | 7.012621 | 9.60E-14 | 6.91E-12 | 780   | 593   | 417  | 13840  | 6086   | 6498   |
| Solyc08g007160.2.1 | -4.64859 | 5.904516 | 3.59E-23 | 8.12E-21 | 236   | 450   | 241  | 3621   | 6428   | 3206   |
| Solyc09g009980.1.1 | -4.64368 | 1.384072 | 7.59E-09 | 2.17E-07 | 2     | 28    | 14   | 109    | 314    | 157    |
| Solyc06g010030.2.1 | -4.62957 | 6.75567  | 2.87E-08 | 7.07E-07 | 979   | 271   | 114  | 11070  | 8093   | 4107   |
| Solyc02g069540.1.1 | -4.62659 | 0.603555 | 8.43E-07 | 1.42E-05 | 0     | 14    | 11   | 119    | 99     | 94     |
| Solyc03g119370.1.1 | -4.62556 | 4.978385 | 6.87E-07 | 1.18E-05 | 299   | 95    | 8    | 2507   | 2839   | 1507   |
| Solyc02g080890.2.1 | -4.62095 | 7.881585 | 1.48E-17 | 1.74E-15 | 1202  | 1853  | 621  | 14432  | 24207  | 13094  |
| Solyc01g073830.1.1 | -4.62008 | 0.978403 | 9.94E-07 | 1.64E-05 | 0     | 28    | 8    | 145    | 124    | 133    |
| Solyc08g005100.2.1 | -4.61947 | 3.980264 | 1.55E-22 | 3.40E-20 | 63    | 122   | 64   | 1244   | 1454   | 743    |
| Solyc01g059960.1.1 | -4.61677 | -0.42189 | 0.000146 | 0.001243 | 6     | 0     | 3    | 102    | 37     | 15     |
| Solyc04g074830.1.1 | -4.61674 | 4.333055 | 1.70E-18 | 2.25E-16 | 62    | 237   | 52   | 1126   | 2078   | 1199   |
| Solyc09g090990.2.1 | -4.60709 | 6.426526 | 9.22E-10 | 3.15E-08 | 255   | 1295  | 69   | 7018   | 5783   | 5103   |
| Solyc01g105080.2.1 | -4.5958  | 0.126342 | 1.88E-05 | 0.000212 | 10    | 2     | 2    | 120    | 47     | 52     |
| Solyc03g120570.2.1 | -4.5956  | 4.258625 | 2.88E-09 | 8.85E-08 | 140   | 36    | 76   | 2461   | 1294   | 395    |
| Solyc05g005070.2.1 | -4.59071 | 6.703043 | 9.50E-18 | 1.15E-15 | 561   | 812   | 271  | 7723   | 9213   | 5529   |
| Solyc07g008520.2.1 | -4.58528 | 3.410531 | 2.61E-16 | 2.67E-14 | 36    | 96    | 45   | 485    | 808    | 886    |
| Solyc01g086680.2.1 | -4.58434 | 6.327423 | 1.03E-07 | 2.21E-06 | 777   | 204   | 56   | 5030   | 8454   | 4227   |
| Solyc10g079900.1.1 | -4.58319 | -1.91557 | 0.000632 | 0.004308 | 0     | 4     | 0    | 21     | 25     | 8      |
| Solyc10g008170.2.1 | -4.58291 | -0.24078 | 0.00076  | 0.00504  | 9     | 0     | 1    | 127    | 32     | 14     |
| Solyc02g077350.1.1 | -4.57893 | -0.07182 | 3.98E-06 | 5.48E-05 | 0     | 10    | 6    | 74     | 100    | 35     |
| Solyc08g062810.1.1 | -4.57443 | 0.794501 | 1.29E-07 | 2.69E-06 | 3     | 13    | 12   | 49     | 252    | 96     |
| Solyc09g090130.2.1 | -4.57165 | 7.230461 | 9.23E-20 | 1.47E-17 | 482   | 1474  | 628  | 9477   | 14082  | 8841   |
| Solyc02g068220.1.1 | -4.5714  | -0.31311 | 2.98E-05 | 0.000318 | 0     | 3     | 9    | 45     | 69     | 53     |
| Solyc05g056420.2.1 | -4.56544 | 3.837268 | 1.89E-17 | 2.22E-15 | 87    | 57    | 64   | 959    | 1389   | 763    |
| Solyc03g111540.1.1 | -4.55052 | 4.365522 | 2.32E-20 | 4.01E-18 | 81    | 222   | 58   | 1416   | 1943   | 1110   |
| Solyc02g079530.2.1 | -4.54551 | 5.803076 | 1.02E-10 | 4.30E-09 | 489   | 206   | 83   | 3777   | 5734   | 2783   |
| Solyc08g074960.2.1 | -4.54481 | 4.354402 | 3.80E-11 | 1.76E-09 | 13    | 290   | 97   | 1464   | 1951   | 1040   |
| Solyc04g008250.1.1 | -4.52952 | 1.047484 | 3.44E-05 | 0.000362 | 8     | 8     | 15   | 37     | 493    | 18     |
| Solyc08g081700.1.1 | -4.52462 | 4.618641 | 2.37E-21 | 4.79E-19 | 77    | 227   | 124  | 1208   | 3108   | 1252   |
| Solyc02g082950.2.1 | -4.51011 | 6.297331 | 1.16E-20 | 2.11E-18 | 372   | 661   | 299  | 5900   | 7192   | 3949   |
| Solyc01g111250.2.1 | -4.50432 | 5.479944 | 5.12E-14 | 3.83E-12 | 349   | 216   | 104  | 2458   | 5316   | 2248   |
| Solyc05g053600.2.1 | -4.49711 | 10.07618 | 1.73E-16 | 1.84E-14 | 4733  | 10667 | 3699 | 100322 | 87628  | 44843  |
| Solyc11g007980.1.1 | -4.49674 | 5.532517 | 4.59E-07 | 8.29E-06 | 48    | 917   | 56   | 979    | 5538   | 3596   |
| Solyc08g013960.1.1 | -4.49331 | 2.744194 | 7.09E-13 | 4.41E-11 | 46    | 38    | 21   | 470    | 742    | 284    |
| Solyc02g062550.2.1 | -4.49329 | 5.979174 | 1.11E-13 | 7.84E-12 | 458   | 432   | 116  | 3532   | 6140   | 3924   |
| Solyc08g029900.2.1 | -4.49268 | 12.31868 | 2.30E-06 | 3.40E-05 | 54231 | 12472 | 2464 | 466367 | 360435 | 250270 |
| Solyc02g062870.2.1 | -4.4883  | 0.087194 | 0.000659 | 0.004462 | 0     | 23    | 0    | 138    | 54     | 28     |
| Solyc01g073660.2.1 | -4.48792 | 8.794417 | 7.28E-17 | 8.12E-15 | 2514  | 3320  | 1539 | 38685  | 36678  | 20151  |
| Solyc03g094120.2.1 | -4.48546 | 4.323907 | 2.43E-11 | 1.18E-09 | 113   | 198   | 39   | 434    | 3051   | 1165   |
| Solyc05g055030.1.1 | -4.48516 | 3.273483 | 1.08E-08 | 2.98E-07 | 93    | 18    | 22   | 803    | 667    | 544    |
| Solyc01g096430.2.1 | -4.47862 | 9.00806  | 6.10E-09 | 1.77E-07 | 4698  | 2010  | 795  | 55770  | 31237  | 20992  |
| Solyc02g076930.1.1 | -4.47708 | 4.229615 | 1.70E-10 | 6.78E-09 | 164   | 92    | 27   | 1889   | 1180   | 854    |
| Solyc04g040130.1.1 | -4.47394 | 7.930083 | 6.03E-11 | 2.66E-09 | 598   | 4050  | 431  | 14297  | 19636  | 17008  |
| Solyc11g012120.1.1 | -4.47204 | 0.48517  | 3.88E-05 | 0.0004   | 6     | 6     | 10   | 12     | 84     | 170    |
| Solyc09g065560.2.1 | -4.46772 | 8.503376 | 3.62E-16 | 3.61E-14 | 2237  | 2250  | 1402 | 32541  | 28852  | 16332  |
| Solyc12g011100.1.1 | -4.46689 | 1.845256 | 1.65E-08 | 4.33E-07 | 2     | 52    | 18   | 212    | 326    | 226    |
| Solyc02g069060.2.1 | -4.46525 | 3.720747 | 1.28E-19 | 2.01E-17 | 43    | 117   | 75   | 798    | 1524   | 628    |
| Solyc12g009160.1.1 | -4.45722 | 3.943389 | 1.02E-18 | 1.40E-16 | 78    | 117   | 68   | 1463   | 1107   | 688    |
| Solyc03g113580.1.1 | -4.4566  | -1.1825  | 0.000122 | 0.001068 | 0     | 7     | 1    | 20     | 57     | 19     |
| Solyc02g069300.1.1 | -4.4459  | -0.67825 | 0.000491 | 0.003472 | 0     | 13    | 0    | 21     | 68     | 43     |
| Solyc12g013640.1.1 | -4.44147 | 0.724669 | 1.39E-05 | 0.000163 | 17    | 2     | 4    | 175    | 82     | 78     |
| Solyc05g055730.2.1 | -4.4399  | 4.296709 | 2.15E-18 | 2.77E-16 | 125   | 95    | 95   | 1545   | 1767   | 937    |
| Solyc01g099210.2.1 | -4.43345 | -1.45084 | 0.000468 | 0.003341 | 0     | 7     | 0    | 17     | 25     | 29     |
| Solyc10g008730.2.1 | -4.42471 | 5.455714 | 2.14E-20 | 3.72E-18 | 248   | 388   | 143  | 3235   | 4166   | 2142   |
| Solyc07g053270.2.1 | -4.42382 | 7.700828 | 8.40E-16 | 7.95E-14 | 1304  | 1601  | 674  | 15032  | 23443  | 8278   |
| Solyc10g079690.1.1 | -4.41345 | 1.090235 | 1.72E-08 | 4.49E-07 | 13    | 18    | 6    | 97     | 295    | 95     |
| Solyc12g017700.1.1 | -4.41002 | 2.629744 | 4.51E-09 | 1.34E-07 | 56    | 20    | 18   | 595    | 337    | 331    |
| Solyc02g088160.2.1 | -4.40981 | 3.149071 | 1.67E-10 | 6.71E-09 | 17    | 94    | 60   | 1066   | 651    | 205    |
| Solyc02g089920.1.1 | -4.40609 | 0.88017  | 1.15E-08 | 3.13E-07 | 11    | 15    | 6    | 119    | 133    | 125    |
| Solyc11g066800.1.1 | -4.398   | 6.190066 | 5.52E-20 | 9.03E-18 | 385   | 522   | 372  | 3955   | 7917   | 4147   |
| Solyc08g074970.1.1 | -4.39625 | 6.243377 | 5.73E-17 | 6.43E-15 | 501   | 579   | 238  | 5263   | 7649   | 3686   |
| Solyc03g005480.2.1 | -4.39588 | 3.68691  | 2.05E-08 | 5.25E-07 | 131   | 52    | 14   | 978    | 729    | 887    |
| Solyc11g007480.1.1 | -4.39435 | 1.23799  | 1.28E-09 | 4.20E-08 | 11    | 16    | 14   | 106    | 250    | 152    |
| Solyc02g092820.2.1 | -4.38956 | 5.231718 | 9.74E-11 | 4.15E-09 | 304   | 220   | 95   | 831    | 5667   | 2190   |

|                    |          |          |          |          |       |       |      |        |       |       |
|--------------------|----------|----------|----------|----------|-------|-------|------|--------|-------|-------|
| Solyc10g024490.1.1 | -4.38376 | 2.047644 | 2.16E-06 | 3.22E-05 | 43    | 3     | 13   | 218    | 308   | 318   |
| Solyc06g066590.2.1 | -4.38363 | 6.092389 | 6.80E-07 | 1.17E-05 | 729   | 285   | 30   | 4860   | 6184  | 3625  |
| NCRNA_8_259        | -4.38224 | 0.38092  | 1.22E-07 | 2.55E-06 | 8     | 8     | 6    | 76     | 111   | 84    |
| Solyc12g056420.1.1 | -4.37432 | 1.090277 | 1.81E-08 | 4.71E-07 | 12    | 8     | 15   | 148    | 245   | 82    |
| Solyc10g005620.2.1 | -4.37    | 5.052188 | 3.07E-15 | 2.77E-13 | 272   | 179   | 97   | 2044   | 2859  | 2104  |
| Solyc04g074680.1.1 | -4.36816 | 6.203279 | 1.86E-13 | 1.28E-11 | 409   | 864   | 158  | 3270   | 9770  | 3732  |
| Solyc08g080530.1.1 | -4.36628 | 1.597667 | 3.19E-06 | 4.51E-05 | 2     | 62    | 6    | 100    | 356   | 205   |
| Solyc04g077300.2.1 | -4.36522 | 5.376756 | 7.58E-19 | 1.07E-16 | 96    | 474   | 264  | 2573   | 4241  | 2243  |
| Solyc01g095860.2.1 | -4.36389 | 0.219994 | 2.50E-06 | 3.65E-05 | 3     | 19    | 2    | 109    | 73    | 57    |
| Solyc08g021880.1.1 | -4.35251 | 1.894989 | 1.46E-09 | 4.74E-08 | 23    | 42    | 6    | 284    | 275   | 215   |
| Solyc01g010420.2.1 | -4.35079 | -1.7535  | 0.000896 | 0.005782 | 3     | 0     | 1    | 22     | 22    | 14    |
| Solyc01g111570.2.1 | -4.33802 | 6.368102 | 4.38E-18 | 5.48E-16 | 457   | 538   | 482  | 7277   | 6839  | 3609  |
| Solyc05g008360.1.1 | -4.33743 | 0.001872 | 1.24E-05 | 0.000147 | 0     | 12    | 8    | 82     | 53    | 64    |
| Solyc02g078530.2.1 | -4.33675 | 4.935237 | 1.88E-18 | 2.47E-16 | 200   | 282   | 88   | 1921   | 2957  | 1720  |
| Solyc12g005680.1.1 | -4.32165 | 1.168312 | 7.19E-09 | 2.06E-07 | 16    | 19    | 6    | 142    | 196   | 135   |
| Solyc01g090890.2.1 | -4.31865 | 0.649885 | 0.000451 | 0.003244 | 11    | 7     | 8    | 22     | 390   | 6     |
| Solyc07g063710.1.1 | -4.31386 | 4.454116 | 1.28E-07 | 2.66E-06 | 6     | 323   | 160  | 921    | 2435  | 1417  |
| Solyc02g078660.2.1 | -4.3126  | 5.569135 | 5.29E-19 | 7.62E-17 | 189   | 534   | 237  | 2143   | 6050  | 2502  |
| Solyc03g121190.2.1 | -4.30993 | 2.953834 | 5.86E-10 | 2.09E-08 | 65    | 65    | 11   | 566    | 517   | 502   |
| Solyc09g011980.1.1 | -4.30962 | 0.452082 | 6.81E-07 | 1.18E-05 | 9     | 15    | 2    | 70     | 167   | 66    |
| Solyc11g071470.1.1 | -4.3083  | 1.717226 | 9.53E-09 | 2.65E-07 | 24    | 17    | 16   | 100    | 392   | 225   |
| Solyc02g086270.2.1 | -4.30448 | 5.764942 | 7.50E-20 | 1.20E-17 | 277   | 579   | 223  | 3635   | 5108  | 2956  |
| Solyc03g043880.2.1 | -4.30358 | 5.852638 | 2.97E-09 | 9.12E-08 | 607   | 207   | 112  | 5307   | 4794  | 2331  |
| Solyc07g055690.1.1 | -4.30114 | 6.187608 | 2.62E-07 | 5.07E-06 | 835   | 256   | 60   | 5377   | 6401  | 3808  |
| Solyc02g067780.2.1 | -4.30008 | 2.991692 | 1.69E-10 | 6.75E-09 | 75    | 41    | 19   | 467    | 838   | 429   |
| Solyc09g008560.2.1 | -4.29712 | 6.446048 | 3.94E-13 | 2.57E-11 | 680   | 529   | 329  | 9159   | 5655  | 3491  |
| Solyc07g005090.2.1 | -4.29095 | 8.04658  | 5.93E-13 | 3.76E-11 | 2170  | 1873  | 710  | 14496  | 29899 | 14024 |
| Solyc03g071850.1.1 | -4.28251 | 3.48768  | 2.46E-07 | 4.80E-06 | 123   | 58    | 7    | 977    | 839   | 545   |
| Solyc10g083290.1.1 | -4.28213 | 9.093727 | 3.20E-11 | 1.49E-09 | 4316  | 5152  | 914  | 34280  | 60407 | 26233 |
| Solyc07g049460.2.1 | -4.28076 | 1.41344  | 1.40E-05 | 0.000164 | 31    | 10    | 2    | 77     | 354   | 163   |
| Solyc12g099260.1.1 | -4.28027 | 10.25323 | 3.73E-12 | 2.08E-10 | 9986  | 6017  | 5137 | 120483 | 82236 | 53312 |
| Solyc06g035960.2.1 | -4.27854 | 10.02501 | 2.60E-11 | 1.24E-09 | 9361  | 6809  | 2305 | 79710  | 98603 | 47926 |
| Solyc01g006050.2.1 | -4.2645  | 1.376602 | 5.72E-06 | 7.56E-05 | 2     | 48    | 11   | 51     | 386   | 155   |
| Solyc06g069650.2.1 | -4.26378 | 3.326616 | 1.48E-08 | 3.95E-07 | 7     | 192   | 44   | 549    | 923   | 652   |
| Solyc10g085010.1.1 | -4.26315 | 9.039297 | 1.17E-12 | 7.10E-11 | 2901  | 7190  | 1132 | 34414  | 56666 | 24934 |
| Solyc01g106610.2.1 | -4.26291 | 6.766907 | 0.000283 | 0.002187 | 1473  | 94    | 41   | 14909  | 3634  | 3500  |
| Solyc08g078700.2.1 | -4.26033 | 3.959797 | 3.31E-08 | 8.01E-07 | 153   | 33    | 66   | 1285   | 499   | 1198  |
| Solyc08g028780.1.1 | -4.26031 | 6.563394 | 1.26E-11 | 6.46E-10 | 844   | 654   | 214  | 8568   | 7144  | 4297  |
| Solyc06g065010.2.1 | -4.25934 | 4.783254 | 1.27E-19 | 2.01E-17 | 172   | 242   | 121  | 2344   | 1910  | 1470  |
| Solyc06g061170.2.1 | -4.2549  | 7.195272 | 6.47E-14 | 4.73E-12 | 1042  | 1145  | 586  | 14965  | 9188  | 6370  |
| Solyc09g011870.1.1 | -4.25158 | 9.50961  | 2.58E-16 | 2.65E-14 | 2762  | 8958  | 3864 | 60724  | 64236 | 32126 |
| Solyc07g008810.1.1 | -4.24404 | 1.288253 | 0.000109 | 0.000971 | 1     | 59    | 3    | 51     | 378   | 134   |
| Solyc03g005510.1.1 | -4.24336 | -0.12142 | 0.000956 | 0.006103 | 11    | 4     | 0    | 9      | 147   | 53    |
| Solyc10g055200.1.1 | -4.2286  | 8.005825 | 1.80E-13 | 1.24E-11 | 1742  | 2787  | 717  | 23164  | 18715 | 12143 |
| Solyc08g075550.2.1 | -4.22541 | 7.393634 | 5.36E-09 | 1.57E-07 | 1768  | 894   | 289  | 6990   | 19191 | 10569 |
| Solyc12g099140.1.1 | -4.21716 | 3.266518 | 8.48E-08 | 1.85E-06 | 108   | 15    | 33   | 729    | 772   | 522   |
| Solyc02g079500.2.1 | -4.21499 | 4.882135 | 7.87E-11 | 3.39E-09 | 71    | 498   | 131  | 698    | 4490  | 1629  |
| Solyc03g111730.2.1 | -4.21184 | 4.271987 | 1.78E-16 | 1.88E-14 | 92    | 211   | 104  | 779    | 2819  | 874   |
| Solyc05g015850.2.1 | -4.21143 | 7.38809  | 1.45E-11 | 7.33E-10 | 1566  | 1145  | 396  | 11728  | 15938 | 8474  |
| Solyc09g074890.1.1 | -4.2103  | 0.913543 | 8.51E-07 | 1.43E-05 | 16    | 9     | 9    | 201    | 83    | 92    |
| Solyc11g007490.1.1 | -4.20612 | 6.345956 | 1.17E-08 | 3.19E-07 | 876   | 494   | 94   | 5411   | 8390  | 3966  |
| Solyc01g097240.2.1 | -4.20013 | 9.69502  | 7.25E-13 | 4.49E-11 | 4012  | 12486 | 2359 | 39486  | 90145 | 50472 |
| Solyc02g085010.1.1 | -4.19653 | 6.807569 | 9.14E-17 | 9.99E-15 | 702   | 1171  | 454  | 8852   | 9103  | 5734  |
| Solyc03g020050.2.1 | -4.19347 | 9.908582 | 0.001193 | 0.007369 | 13658 | 291   | 681  | 153504 | 18843 | 20328 |
| Solyc03g096190.1.1 | -4.18975 | 2.979297 | 8.31E-11 | 3.56E-09 | 41    | 121   | 17   | 343    | 785   | 546   |
| Solyc02g036480.1.1 | -4.18831 | 8.299215 | 6.50E-13 | 4.09E-11 | 2222  | 3668  | 763  | 23298  | 30758 | 14430 |
| Solyc07g045000.2.1 | -4.18709 | 2.103296 | 5.52E-08 | 1.26E-06 | 4     | 63    | 33   | 190    | 607   | 189   |
| Solyc11g008820.1.1 | -4.18689 | 2.317407 | 1.14E-09 | 3.81E-08 | 43    | 43    | 12   | 237    | 532   | 306   |
| Solyc04g072920.2.1 | -4.18421 | 4.705289 | 2.71E-16 | 2.75E-14 | 128   | 370   | 90   | 1268   | 3281  | 1306  |
| Solyc11g063530.1.1 | -4.18283 | -1.32489 | 0.001174 | 0.007269 | 0     | 1     | 6    | 13     | 52    | 20    |
| Solyc06g008620.1.1 | -4.17759 | 8.415602 | 0.000658 | 0.004457 | 4901  | 355   | 88   | 50193  | 10802 | 8350  |
| Solyc06g076320.1.1 | -4.17695 | 2.533386 | 6.88E-07 | 1.19E-05 | 64    | 35    | 7    | 637    | 460   | 152   |
| Solyc09g007520.2.1 | -4.1733  | 7.777837 | 8.15E-09 | 2.31E-07 | 2462  | 817   | 547  | 20037  | 17357 | 9289  |
| Solyc02g094190.2.1 | -4.16303 | 7.447828 | 4.13E-14 | 3.14E-12 | 1453  | 1062  | 822  | 11477  | 18187 | 8480  |
| Solyc03g020030.2.1 | -4.16118 | 5.272683 | 4.22E-05 | 0.000431 | 543   | 56    | 23   | 3905   | 1547  | 2199  |
| Solyc10g017570.2.1 | -4.16101 | 6.065396 | 8.71E-17 | 9.55E-15 | 499   | 579   | 280  | 4100   | 6732  | 3637  |
| Solyc12g088040.1.1 | -4.15711 | 6.116084 | 2.77E-11 | 1.32E-09 | 643   | 584   | 147  | 6195   | 5078  | 3275  |
| Solyc05g016310.1.1 | -4.15666 | 7.147525 | 1.48E-12 | 8.85E-11 | 1170  | 1383  | 359  | 8492   | 16274 | 6685  |
| Solyc02g083850.2.1 | -4.15602 | 5.807962 | 3.53E-13 | 2.32E-11 | 510   | 355   | 206  | 4937   | 4012  | 2750  |
| Solyc01g073890.2.1 | -4.15538 | 5.925626 | 3.36E-14 | 2.59E-12 | 174   | 1055  | 264  | 3936   | 5871  | 3264  |
| Solyc01g105630.2.1 | -4.15451 | 3.039271 | 5.08E-12 | 2.75E-10 | 59    | 98    | 20   | 557    | 745   | 447   |
| Solyc05g009410.1.1 | -4.15348 | -0.71158 | 0.000216 | 0.001732 | 6     | 0     | 4    | 31     | 85    | 20    |
| Solyc01g007000.2.1 | -4.1514  | 4.723159 | 5.96E-12 | 3.21E-10 | 138   | 449   | 44   | 1890   | 2523  | 1286  |
| Solyc10g079810.1.1 | -4.1468  | 5.411528 | 1.04E-16 | 1.13E-14 | 352   | 313   | 178  | 3220   | 3911  | 2019  |
| Solyc10g005440.1.1 | -4.1459  | 0.143357 | 0.00159  | 0.00938  | 17    | 0     | 0    | 80     | 136   | 31    |
| Solyc08g068770.1.1 | -4.13833 | 8.929279 | 1.48E-11 | 7.49E-10 | 3763  | 5428  | 1240 | 47245  | 38740 | 18204 |
| Solyc06g005520.2.1 | -4.1278  | 7.64011  | 1.58E-15 | 1.46E-13 | 1509  | 1738  | 880  | 13912  | 18046 | 10578 |
| Solyc09g030370.2.1 | -4.12229 | 1.655757 | 1.02E-06 | 1.69E-05 | 36    | 11    | 10   | 310    | 160   | 163   |
| Solyc04g008100.1.1 | -4.12093 | 7.231857 | 2.93E-06 | 4.19E-05 | 1833  | 902   | 73   | 8775   | 17570 | 7058  |
| Solyc12g057140.1.1 | -4.11476 | 6.372857 | 5.60E-16 | 5.49E-14 | 517   | 596   | 596  | 3964   | 10650 | 4041  |
| Solyc02g065190.2.1 | -4.11324 | 5.16643  | 7.78E-10 | 2.71E-08 | 347   | 194   | 148  | 712    | 4395  | 2695  |
| Solyc08g013970.1.1 | -4.11132 | 3.95464  | 3.37E-15 | 3.00E-13 | 82    | 92    | 143  | 891    | 1959  | 650   |
| Solyc02g070910.1.1 | -4.10739 | 5.04219  | 4.35E-19 | 6.35E-17 | 132   | 463   | 185  | 1665   | 3430  | 1997  |
| Solyc11g008840.1.1 | -4.10721 | -1.55667 | 0.000372 | 0.002752 | 2     | 5     | 0    | 29     | 21    | 16    |

|                    |          |          |          |          |      |       |      |       |       |       |
|--------------------|----------|----------|----------|----------|------|-------|------|-------|-------|-------|
| Solyc03g082530.1.1 | -4.1003  | 5.485005 | 1.75E-11 | 8.68E-10 | 446  | 379   | 88   | 3193  | 3993  | 2342  |
| Solyc01g096560.1.1 | -4.08648 | 3.168292 | 7.29E-10 | 2.56E-08 | 96   | 37    | 37   | 473   | 797   | 606   |
| Solyc05g010020.2.1 | -4.08549 | 5.475672 | 9.66E-11 | 4.12E-09 | 383  | 544   | 63   | 2768  | 4319  | 2449  |
| Solyc03g123380.1.1 | -4.0793  | 2.584367 | 4.61E-11 | 2.09E-09 | 17   | 68    | 54   | 277   | 529   | 437   |
| Solyc09g097960.2.1 | -4.07851 | 5.16415  | 1.16E-10 | 4.79E-09 | 114  | 743   | 99   | 1325  | 4765  | 1966  |
| Solyc06g066310.2.1 | -4.07452 | 6.510632 | 1.76E-13 | 1.22E-11 | 565  | 851   | 583  | 10054 | 4413  | 4013  |
| Solyc06g070990.2.1 | -4.07158 | 3.851365 | 1.50E-10 | 6.08E-09 | 140  | 140   | 27   | 1244  | 964   | 762   |
| Solyc06g062540.2.1 | -4.07059 | 2.152561 | 0.000503 | 0.003536 | 8    | 109   | 8    | 34    | 1106  | 46    |
| Solyc08g022240.1.1 | -4.06638 | 1.668915 | 6.90E-09 | 1.98E-07 | 28   | 27    | 12   | 274   | 278   | 127   |
| Solyc02g021680.2.1 | -4.06587 | 0.019481 | 4.72E-05 | 0.000474 | 0    | 20    | 6    | 48    | 112   | 57    |
| Solyc01g080570.2.1 | -4.06175 | 7.446584 | 8.94E-07 | 1.50E-05 | 2376 | 468   | 279  | 12407 | 16378 | 8636  |
| Solyc07g006420.1.1 | -4.06136 | 5.035313 | 3.51E-10 | 1.32E-08 | 245  | 494   | 43   | 1483  | 3428  | 2111  |
| Solyc02g077370.1.1 | -4.05926 | 6.818644 | 5.92E-08 | 1.35E-06 | 1251 | 977   | 110  | 7315  | 10504 | 6221  |
| Solyc05g041920.2.1 | -4.05723 | 6.034051 | 2.81E-13 | 1.88E-11 | 565  | 695   | 184  | 4803  | 6039  | 3190  |
| Solyc08g005280.1.1 | -4.0527  | 2.035089 | 2.21E-09 | 6.95E-08 | 26   | 49    | 19   | 129   | 456   | 291   |
| Solyc05g052280.2.1 | -4.05217 | 5.864791 | 6.48E-12 | 3.48E-10 | 210  | 1009  | 279  | 1700  | 6699  | 4161  |
| Solyc12g057060.1.1 | -4.05142 | 8.959768 | 5.24E-09 | 1.54E-07 | 5358 | 3515  | 1241 | 54532 | 30583 | 18407 |
| Solyc06g035710.1.1 | -4.04927 | -1.51062 | 0.000813 | 0.00533  | 3    | 4     | 0    | 14    | 48    | 13    |
| Solyc12g056600.2.1 | -4.04829 | 7.322317 | 2.04E-07 | 4.05E-06 | 2058 | 349   | 487  | 9724  | 18492 | 7256  |
| Solyc05g008910.2.1 | -4.04284 | 1.198479 | 2.71E-05 | 0.000292 | 12   | 30    | 12   | 369   | 60    | 33    |
| Solyc01g107390.2.1 | -4.04009 | 6.45696  | 9.36E-07 | 1.56E-05 | 1171 | 350   | 125  | 9482  | 5916  | 3051  |
| Solyc10g081560.1.1 | -4.03722 | 5.774317 | 3.93E-12 | 2.18E-10 | 517  | 539   | 139  | 3402  | 6161  | 2507  |
| Solyc10g085030.1.1 | -4.03444 | 4.483335 | 2.55E-14 | 2.01E-12 | 128  | 357   | 72   | 1992  | 1804  | 946   |
| Solyc04g055000.2.1 | -4.0208  | 1.195883 | 1.39E-05 | 0.000163 | 0    | 33    | 25   | 132   | 258   | 110   |
| NCRNA_12_259       | -4.01332 | 0.104612 | 3.02E-06 | 4.30E-05 | 9    | 12    | 3    | 80    | 82    | 58    |
| NCRNA_12_273       | -4.01332 | 0.104612 | 3.02E-06 | 4.30E-05 | 9    | 12    | 3    | 80    | 82    | 58    |
| Solyc02g062670.2.1 | -4.01132 | 5.97847  | 2.42E-11 | 1.17E-09 | 661  | 482   | 190  | 5622  | 4664  | 2899  |
| Solyc06g074990.1.1 | -4.01102 | 2.437192 | 1.91E-11 | 9.42E-10 | 37   | 53    | 33   | 295   | 690   | 231   |
| Solyc09g074490.2.1 | -4.00551 | -1.10009 | 0.000625 | 0.004265 | 3    | 8     | 0    | 18    | 25    | 44    |
| Solyc03g119970.2.1 | -4.00061 | 8.795504 | 7.95E-12 | 4.20E-10 | 4309 | 3019  | 2073 | 20790 | 56157 | 22284 |
| Solyc01g097390.2.1 | -3.9983  | 3.276217 | 7.13E-11 | 3.10E-09 | 97   | 74    | 37   | 392   | 1069  | 622   |
| Solyc09g014460.1.1 | -3.99716 | -0.41258 | 0.000113 | 0.001004 | 0    | 16    | 4    | 62    | 60    | 33    |
| Solyc06g036420.1.1 | -3.98471 | 2.210702 | 3.31E-10 | 1.26E-08 | 38   | 47    | 21   | 258   | 354   | 329   |
| Solyc12g007040.1.1 | -3.98469 | 3.23233  | 1.11E-13 | 7.84E-12 | 71   | 110   | 41   | 705   | 770   | 493   |
| Solyc02g082450.2.1 | -3.98303 | 8.197409 | 1.85E-07 | 3.70E-06 | 3970 | 1225  | 538  | 20078 | 29117 | 14136 |
| Solyc01g103580.2.1 | -3.97921 | 5.106449 | 4.08E-16 | 4.06E-14 | 260  | 342   | 194  | 3432  | 2201  | 1483  |
| Solyc09g005840.1.1 | -3.97804 | 2.709443 | 2.93E-11 | 1.38E-09 | 57   | 61    | 30   | 553   | 460   | 335   |
| Solyc03g043900.1.1 | -3.9762  | 2.583472 | 4.13E-10 | 1.52E-08 | 26   | 99    | 31   | 203   | 613   | 444   |
| Solyc04g079730.1.1 | -3.97605 | 5.525576 | 1.05E-11 | 5.44E-10 | 443  | 397   | 182  | 5065  | 2608  | 1789  |
| Solyc08g081550.2.1 | -3.97251 | 8.245354 | 1.61E-10 | 6.50E-09 | 2751 | 3626  | 775  | 28839 | 24998 | 10963 |
| Solyc01g103870.1.1 | -3.97189 | 2.308985 | 1.64E-08 | 4.32E-07 | 52   | 39    | 17   | 489   | 310   | 218   |
| Solyc11g068440.1.1 | -3.97177 | 5.265136 | 2.91E-16 | 2.93E-14 | 344  | 362   | 167  | 2386  | 3930  | 1978  |
| Solyc06g073760.2.1 | -3.97008 | 5.055541 | 5.81E-16 | 5.65E-14 | 231  | 464   | 130  | 1511  | 3755  | 1954  |
| Solyc06g076020.2.1 | -3.95992 | 7.988101 | 1.11E-08 | 3.04E-07 | 1831 | 4499  | 343  | 20911 | 23378 | 10347 |
| Solyc08g067390.2.1 | -3.95967 | 6.022561 | 6.43E-16 | 6.19E-14 | 510  | 753   | 291  | 4367  | 5473  | 3747  |
| Solyc02g064830.2.1 | -3.95636 | 5.491764 | 7.53E-06 | 9.56E-05 | 686  | 134   | 38   | 2305  | 4735  | 2628  |
| Solyc09g014590.2.1 | -3.95153 | 0.407038 | 2.37E-05 | 0.000259 | 8    | 4     | 16   | 150   | 78    | 43    |
| Solyc04g074540.2.1 | -3.95149 | 0.237899 | 3.55E-05 | 0.000372 | 0    | 19    | 12   | 83    | 111   | 55    |
| Solyc05g050350.1.1 | -3.95124 | 6.996689 | 1.39E-09 | 4.55E-08 | 1333 | 1344  | 263  | 11979 | 9601  | 5253  |
| Solyc05g005150.1.1 | -3.9326  | 7.819165 | 4.87E-15 | 4.21E-13 | 1152 | 3582  | 1250 | 14563 | 21785 | 11876 |
| Solyc04g077180.1.1 | -3.93213 | 3.74936  | 2.82E-13 | 1.89E-11 | 43   | 229   | 94   | 621   | 1202  | 961   |
| Solyc03g080190.2.1 | -3.92899 | 8.533189 | 5.48E-13 | 3.49E-11 | 3398 | 3934  | 1439 | 23515 | 35827 | 19724 |
| Solyc02g079150.1.1 | -3.92213 | 0.543021 | 2.78E-07 | 5.32E-06 | 9    | 19    | 8    | 95    | 153   | 65    |
| Solyc01g008690.2.1 | -3.91719 | 3.791879 | 1.11E-07 | 2.34E-06 | 195  | 51    | 34   | 1143  | 1187  | 606   |
| Solyc12g010410.1.1 | -3.91693 | 4.050502 | 2.49E-16 | 2.57E-14 | 93   | 257   | 87   | 834   | 1792  | 946   |
| Solyc09g011350.1.1 | -3.91613 | -1.25334 | 0.001126 | 0.007018 | 4    | 0     | 4    | 45    | 26    | 12    |
| Solyc07g018200.1.1 | -3.91381 | 5.795508 | 3.19E-10 | 1.22E-08 | 636  | 393   | 197  | 5656  | 3676  | 2194  |
| Solyc08g021870.1.1 | -3.90025 | 2.21147  | 3.91E-10 | 1.45E-08 | 17   | 74    | 34   | 338   | 323   | 280   |
| Solyc04g073950.1.1 | -3.89984 | 6.275788 | 4.14E-14 | 3.14E-12 | 729  | 607   | 449  | 6063  | 6287  | 3872  |
| Solyc01g109120.2.1 | -3.89082 | 6.477488 | 4.43E-11 | 2.02E-09 | 354  | 1991  | 302  | 5539  | 8667  | 4786  |
| Solyc05g041910.2.1 | -3.8848  | 9.489903 | 3.69E-14 | 2.82E-12 | 4936 | 10626 | 3406 | 47825 | 71864 | 34940 |
| Solyc07g062490.1.1 | -3.87793 | 9.61753  | 1.56E-08 | 4.14E-07 | 9699 | 3631  | 3542 | 78943 | 42294 | 37338 |
| Solyc01g081340.2.1 | -3.87757 | 2.344916 | 1.70E-09 | 5.48E-08 | 33   | 90    | 16   | 296   | 422   | 328   |
| Solyc05g008310.2.1 | -3.87722 | 6.396879 | 4.72E-15 | 4.09E-13 | 353  | 1346  | 622  | 4494  | 9590  | 4317  |
| Solyc11g008600.1.1 | -3.87708 | 3.292616 | 2.45E-13 | 1.66E-11 | 46   | 159   | 63   | 469   | 976   | 624   |
| Solyc05g021080.1.1 | -3.87596 | 2.200268 | 1.08E-07 | 2.29E-06 | 31   | 39    | 41   | 560   | 332   | 86    |
| Solyc10g005300.2.1 | -3.87437 | 0.127159 | 5.93E-05 | 0.00058  | 9    | 17    | 2    | 130   | 66    | 28    |
| Solyc03g098100.2.1 | -3.87076 | 8.726665 | 3.92E-08 | 9.32E-07 | 5727 | 2197  | 1188 | 23069 | 52072 | 19074 |
| Solyc03g113130.2.1 | -3.86845 | 2.016196 | 1.04E-08 | 2.87E-07 | 9    | 67    | 37   | 203   | 410   | 244   |
| Solyc04g082960.1.1 | -3.86102 | 6.266389 | 1.04E-14 | 8.68E-13 | 576  | 1078  | 370  | 3940  | 6950  | 5116  |
| Solyc02g077520.2.1 | -3.86025 | 2.240409 | 5.06E-10 | 1.83E-08 | 23   | 63    | 39   | 218   | 367   | 366   |
| Solyc02g087450.2.1 | -3.85986 | 1.294246 | 8.70E-08 | 1.89E-06 | 8    | 23    | 31   | 178   | 215   | 121   |
| Solyc11g068780.1.1 | -3.85872 | 2.338993 | 1.59E-07 | 3.22E-06 | 65   | 23    | 22   | 436   | 334   | 260   |
| Solyc10g080010.1.1 | -3.85725 | 7.457132 | 3.66E-13 | 2.40E-11 | 1514 | 2318  | 700  | 11696 | 16473 | 9125  |
| Solyc02g068680.1.1 | -3.85145 | 6.327868 | 1.15E-08 | 3.15E-07 | 786  | 1206  | 117  | 4017  | 9369  | 4186  |
| Solyc06g072650.1.1 | -3.8505  | 6.151981 | 1.03E-15 | 9.69E-14 | 359  | 1080  | 513  | 5946  | 5085  | 3615  |
| Solyc07g042230.1.1 | -3.84605 | 1.701016 | 3.98E-06 | 5.48E-05 | 20   | 71    | 4    | 338   | 242   | 103   |
| Solyc02g087100.1.1 | -3.8457  | 0.749929 | 2.33E-06 | 3.43E-05 | 12   | 24    | 8    | 189   | 98    | 56    |
| Solyc08g078970.1.1 | -3.84321 | 2.440135 | 2.08E-09 | 6.59E-08 | 54   | 60    | 21   | 488   | 422   | 225   |
| Solyc02g072070.2.1 | -3.8427  | 4.32305  | 8.15E-08 | 1.78E-06 | 260  | 190   | 23   | 1149  | 2074  | 1069  |
| Solyc05g012180.2.1 | -3.84092 | 5.399818 | 2.69E-19 | 3.99E-17 | 247  | 621   | 281  | 2790  | 3994  | 2181  |
| Solyc04g005240.1.1 | -3.84089 | 0.015483 | 4.85E-05 | 0.000485 | 11   | 13    | 1    | 46    | 109   | 58    |
| Solyc03g007080.2.1 | -3.83752 | 2.278419 | 2.83E-08 | 6.96E-07 | 53   | 45    | 19   | 459   | 425   | 154   |
| Solyc06g065430.2.1 | -3.83706 | -1.94721 | 0.001592 | 0.009388 | 0    | 3     | 3    | 19    | 18    | 12    |

|                    |          |          |          |          |       |       |       |        |        |        |
|--------------------|----------|----------|----------|----------|-------|-------|-------|--------|--------|--------|
| Solyc05g053150.1.1 | -3.83539 | 5.546277 | 9.50E-07 | 1.58E-05 | 699   | 178   | 114   | 1416   | 6749   | 2426   |
| Solyc02g068540.1.1 | -3.83435 | 4.306594 | 5.82E-16 | 5.65E-14 | 155   | 175   | 160   | 1739   | 1464   | 904    |
| Solyc02g067790.2.1 | -3.83429 | 6.916219 | 1.04E-08 | 2.89E-07 | 1475  | 987   | 371   | 3766   | 16693  | 6624   |
| Solyc09g011740.2.1 | -3.82811 | 8.770147 | 1.90E-12 | 1.11E-10 | 4293  | 4540  | 2050  | 35521  | 37994  | 19021  |
| NCRNA_5_231        | -3.82443 | -0.06383 | 0.000303 | 0.002317 | 13    | 8     | 1     | 24     | 106    | 69     |
| Solyc08g078550.1.1 | -3.82396 | 2.901362 | 4.25E-10 | 1.56E-08 | 30    | 109   | 68    | 223    | 971    | 450    |
| Solyc03g119810.1.1 | -3.82352 | 5.260564 | 8.64E-15 | 7.24E-13 | 287   | 609   | 159   | 3275   | 3070   | 1693   |
| Solyc02g079540.1.1 | -3.82322 | 4.426455 | 1.35E-14 | 1.10E-12 | 174   | 318   | 88    | 1779   | 1861   | 915    |
| Solyc10g076780.1.1 | -3.81838 | 5.881759 | 1.77E-15 | 1.63E-13 | 273   | 1021  | 404   | 4524   | 5028   | 2845   |
| Solyc06g051970.2.1 | -3.81602 | 3.106157 | 1.66E-09 | 5.36E-08 | 107   | 49    | 41    | 571    | 805    | 444    |
| Solyc05g007110.2.1 | -3.80874 | 2.802045 | 3.63E-05 | 0.000379 | 114   | 33    | 4     | 546    | 562    | 343    |
| Solyc07g042550.2.1 | -3.80719 | 9.811123 | 2.46E-14 | 1.97E-12 | 7325  | 10974 | 5336  | 59162  | 91676  | 42538  |
| Solyc06g084370.1.1 | -3.80523 | 3.947696 | 5.11E-16 | 5.03E-14 | 104   | 220   | 98    | 778    | 1779   | 803    |
| Solyc08g074680.2.1 | -3.80479 | 9.806091 | 1.11E-05 | 0.000133 | 13524 | 2012  | 3315  | 113342 | 40362  | 27578  |
| Solyc08g007460.2.1 | -3.80239 | 9.109928 | 4.42E-11 | 2.02E-09 | 5911  | 6251  | 1898  | 37184  | 54291  | 26706  |
| Solyc10g086180.1.1 | -3.802   | 9.814525 | 2.96E-11 | 1.39E-09 | 2844  | 13143 | 9632  | 84677  | 71561  | 33700  |
| Solyc06g009290.2.1 | -3.7998  | 9.657347 | 4.54E-08 | 1.06E-06 | 11446 | 4521  | 2264  | 50450  | 73344  | 45654  |
| Solyc03g043700.2.1 | -3.79377 | 4.33937  | 1.20E-12 | 7.28E-11 | 191   | 263   | 82    | 1937   | 1574   | 746    |
| Solyc06g053270.1.1 | -3.79067 | 0.284061 | 1.65E-05 | 0.000189 | 2     | 21    | 12    | 41     | 132    | 82     |
| Solyc04g077810.1.1 | -3.78979 | 4.420542 | 4.29E-10 | 1.57E-08 | 227   | 274   | 60    | 1021   | 1295   | 1841   |
| Solyc05g056500.1.1 | -3.77684 | 5.975221 | 1.88E-16 | 1.97E-14 | 515   | 771   | 399   | 4010   | 5576   | 3558   |
| Solyc12g049030.1.1 | -3.75727 | 7.089496 | 1.08E-07 | 2.29E-06 | 958   | 3107  | 184   | 7080   | 12433  | 8781   |
| Solyc10g055820.1.1 | -3.75312 | 5.091862 | 1.25E-14 | 1.03E-12 | 139   | 514   | 340   | 1616   | 2583   | 2631   |
| Solyc09g007730.2.1 | -3.75192 | 4.798842 | 2.51E-19 | 3.74E-17 | 178   | 384   | 221   | 1789   | 2382   | 1605   |
| Solyc07g056470.2.1 | -3.7501  | 6.275143 | 6.59E-06 | 8.52E-05 | 1289  | 261   | 151   | 7981   | 4876   | 3036   |
| Solyc02g088510.2.1 | -3.74843 | 4.170274 | 1.40E-17 | 1.66E-15 | 107   | 260   | 146   | 1319   | 1682   | 823    |
| Solyc06g053440.2.1 | -3.74558 | -1.06749 | 0.000587 | 0.004036 | 0     | 7     | 6     | 26     | 60     | 16     |
| Solyc05g052880.2.1 | -3.74164 | 0.64404  | 8.95E-05 | 0.000821 | 21    | 6     | 9     | 194    | 66     | 50     |
| Solyc12g088940.1.1 | -3.7375  | 6.172283 | 4.42E-14 | 3.34E-12 | 291   | 1301  | 606   | 4053   | 6787   | 4273   |
| Solyc12g057150.1.1 | -3.73721 | 4.262624 | 8.05E-16 | 7.65E-14 | 179   | 221   | 116   | 1088   | 1896   | 1075   |
| Solyc07g006800.1.1 | -3.73628 | 1.245187 | 0.000176 | 0.001455 | 33    | 13    | 10    | 250    | 27     | 157    |
| Solyc05g051210.2.1 | -3.73434 | 1.640166 | 4.83E-07 | 8.70E-06 | 36    | 21    | 20    | 109    | 279    | 244    |
| Solyc04g074480.2.1 | -3.73248 | 11.37724 | 3.43E-14 | 2.64E-12 | 14750 | 35622 | 25546 | 205503 | 224532 | 126905 |
| Solyc12g015860.1.1 | -3.72961 | 8.3198   | 3.04E-13 | 2.03E-11 | 1587  | 4584  | 3117  | 28438  | 21134  | 15554  |
| Solyc02g062390.2.1 | -3.72899 | 6.213928 | 1.57E-06 | 2.45E-05 | 1117  | 590   | 100   | 3910   | 10385  | 2639   |
| Solyc02g092870.1.1 | -3.7245  | 3.265338 | 2.34E-08 | 5.92E-07 | 137   | 56    | 37    | 727    | 709    | 527    |
| Solyc02g085130.2.1 | -3.72377 | 3.609786 | 2.16E-14 | 1.74E-12 | 109   | 141   | 82    | 653    | 1256   | 684    |
| Solyc03g006250.2.1 | -3.72239 | 7.735536 | 2.73E-13 | 1.84E-11 | 935   | 3317  | 2091  | 16522  | 20352  | 8736   |
| Solyc09g010780.2.1 | -3.71741 | 5.729574 | 1.62E-16 | 1.73E-14 | 342   | 786   | 414   | 2794   | 6118   | 2637   |
| Solyc11g006540.1.1 | -3.71732 | 5.346928 | 1.62E-13 | 1.13E-11 | 462   | 325   | 249   | 2215   | 3907   | 2417   |
| Solyc07g056000.2.1 | -3.71714 | 6.062593 | 2.80E-09 | 8.64E-08 | 481   | 1487  | 143   | 5048   | 6498   | 2777   |
| Solyc05g052670.1.1 | -3.71577 | 9.267127 | 1.03E-10 | 4.34E-09 | 6270  | 5921  | 4030  | 65454  | 39138  | 22218  |
| Solyc02g070920.2.1 | -3.71147 | 1.760454 | 2.42E-08 | 6.11E-07 | 14    | 46    | 38    | 136    | 363    | 216    |
| Solyc01g079980.2.1 | -3.70926 | 0.603551 | 0.000651 | 0.004418 | 19    | 15    | 5     | 244    | 30     | 23     |
| Solyc11g044840.1.1 | -3.70898 | 5.782116 | 6.84E-08 | 1.53E-06 | 108   | 1314  | 424   | 1571   | 8599   | 2508   |
| Solyc07g048060.1.1 | -3.70866 | 5.251194 | 1.65E-07 | 3.32E-06 | 533   | 398   | 53    | 1936   | 4784   | 1718   |
| Solyc04g057830.1.1 | -3.70224 | 3.616263 | 1.53E-12 | 9.09E-11 | 103   | 204   | 54    | 974    | 1105   | 517    |
| Solyc05g016060.2.1 | -3.69905 | 8.268029 | 1.87E-08 | 4.84E-07 | 4297  | 2728  | 812   | 23232  | 28073  | 13911  |
| Solyc02g071560.2.1 | -3.69808 | 4.622621 | 0.000123 | 0.001077 | 5     | 678   | 190   | 483    | 2703   | 1962   |
| Solyc08g005790.2.1 | -3.69705 | 1.203457 | 2.30E-06 | 3.40E-05 | 5     | 56    | 15    | 199    | 188    | 93     |
| Solyc01g102390.2.1 | -3.69686 | 6.80256  | 3.86E-10 | 1.44E-08 | 1412  | 759   | 623   | 4950   | 12212  | 6669   |
| Solyc01g097450.2.1 | -3.69652 | 4.44477  | 1.14E-12 | 6.92E-11 | 60    | 426   | 209   | 1394   | 2069   | 1132   |
| Solyc03g115060.2.1 | -3.69442 | 7.883038 | 2.54E-09 | 7.88E-08 | 2919  | 2823  | 633   | 14844  | 21388  | 13106  |
| Solyc02g079750.2.1 | -3.6876  | 8.971787 | 1.02E-10 | 4.30E-09 | 5994  | 4581  | 2575  | 40624  | 34703  | 26718  |
| Solyc03g044210.2.1 | -3.68609 | -0.17802 | 0.000471 | 0.003355 | 13    | 1     | 6     | 38     | 72     | 65     |
| Solyc10g055420.1.1 | -3.68443 | 1.480372 | 4.58E-05 | 0.000463 | 47    | 8     | 9     | 239    | 168    | 149    |
| Solyc01g068630.2.1 | -3.6843  | 3.514628 | 5.92E-08 | 1.35E-06 | 142   | 102   | 54    | 1428   | 596    | 307    |
| Solyc10g076480.1.1 | -3.68301 | 7.484669 | 1.19E-14 | 9.82E-13 | 1079  | 2953  | 1404  | 12164  | 16657  | 8945   |
| Solyc03g083960.2.1 | -3.68213 | 6.016945 | 4.55E-15 | 3.98E-13 | 534   | 953   | 403   | 4454   | 6774   | 2751   |
| Solyc05g052650.2.1 | -3.67396 | 2.689759 | 7.31E-08 | 1.62E-06 | 24    | 141   | 46    | 760    | 338    | 209    |
| Solyc05g055080.1.1 | -3.66534 | 2.634875 | 1.11E-06 | 1.81E-05 | 15    | 190   | 20    | 310    | 640    | 362    |
| Solyc09g098010.2.1 | -3.66463 | 0.117411 | 7.31E-05 | 0.000694 | 13    | 15    | 2     | 104    | 80     | 38     |
| Solyc03g006610.2.1 | -3.66289 | 5.340451 | 6.13E-17 | 6.85E-15 | 363   | 564   | 250   | 2619   | 3926   | 2031   |
| Solyc03g111170.2.1 | -3.65841 | 8.713964 | 2.67E-13 | 1.80E-11 | 4133  | 4551  | 2991  | 29987  | 38161  | 20212  |
| Solyc04g081510.2.1 | -3.65638 | 7.528654 | 1.41E-14 | 1.15E-12 | 1509  | 2578  | 1336  | 12339  | 17109  | 9383   |
| Solyc12g100170.1.1 | -3.65293 | 1.5424   | 9.15E-08 | 1.97E-06 | 19    | 59    | 14    | 137    | 296    | 177    |
| Solyc07g056500.2.1 | -3.6519  | 6.422742 | 1.88E-13 | 1.29E-11 | 880   | 1103  | 466   | 5317   | 7999   | 4664   |
| Solyc09g014470.1.1 | -3.65002 | -0.57866 | 0.000429 | 0.003107 | 0     | 10    | 10    | 51     | 48     | 34     |
| Solyc09g007930.2.1 | -3.64956 | 2.262518 | 8.14E-05 | 0.000759 | 76    | 30    | 13    | 117    | 968    | 101    |
| Solyc01g107400.2.1 | -3.6474  | 3.944787 | 0.001163 | 0.00722  | 312   | 5     | 17    | 893    | 1015   | 1128   |
| Solyc06g062920.2.1 | -3.64564 | 5.400059 | 2.34E-05 | 0.000256 | 695   | 369   | 20    | 2902   | 3940   | 2058   |
| Solyc08g006730.1.1 | -3.64535 | 3.413862 | 4.55E-13 | 2.94E-11 | 63    | 167   | 96    | 912    | 910    | 420    |
| Solyc03g119660.1.1 | -3.64385 | 2.831498 | 3.01E-11 | 1.41E-09 | 67    | 85    | 51    | 366    | 648    | 454    |
| Solyc02g079460.1.1 | -3.64358 | 1.881757 | 1.45E-06 | 2.29E-05 | 53    | 36    | 9     | 290    | 293    | 176    |
| Solyc02g093250.2.1 | -3.63791 | 5.806885 | 1.74E-11 | 8.65E-10 | 454   | 1092  | 228   | 5051   | 3788   | 2577   |
| Solyc02g083370.1.1 | -3.63657 | 1.710499 | 2.88E-08 | 7.07E-07 | 31    | 47    | 18    | 153    | 321    | 206    |
| Solyc09g007860.2.1 | -3.63398 | 5.021973 | 1.03E-12 | 6.29E-11 | 377   | 423   | 129   | 1982   | 3099   | 1745   |
| Solyc08g075320.2.1 | -3.63108 | 4.041561 | 3.17E-11 | 1.48E-09 | 126   | 306   | 87    | 759    | 2497   | 546    |
| Solyc01g056860.1.1 | -3.63021 | 2.318968 | 1.10E-07 | 2.34E-06 | 47    | 65    | 33    | 582    | 334    | 121    |
| Solyc11g007950.1.1 | -3.62511 | 0.920154 | 0.000248 | 0.001955 | 0     | 50    | 17    | 177    | 152    | 65     |
| Solyc03g005980.2.1 | -3.6231  | 5.307821 | 1.83E-13 | 1.26E-11 | 283   | 807   | 196   | 2978   | 4134   | 1462   |
| Solyc08g081540.2.1 | -3.61787 | 3.978928 | 9.19E-13 | 5.66E-11 | 130   | 295   | 74    | 1304   | 1300   | 683    |
| Solyc09g090980.2.1 | -3.61411 | 9.789611 | 2.00E-09 | 6.35E-08 | 5475  | 21576 | 3354  | 76045  | 55715  | 46117  |
| Solyc03g098660.2.1 | -3.61363 | 5.733804 | 1.05E-10 | 4.37E-09 | 444   | 1089  | 191   | 2371   | 4521   | 3886   |

|                    |          |          |          |          |       |       |      |        |       |       |
|--------------------|----------|----------|----------|----------|-------|-------|------|--------|-------|-------|
| Solyc07g065090.1.1 | -3.60746 | 7.427848 | 2.32E-12 | 1.34E-10 | 1770  | 1898  | 1263 | 14989  | 12799 | 7669  |
| Solyc07g005110.2.1 | -3.60665 | 2.879779 | 4.72E-08 | 1.10E-06 | 57    | 173   | 17   | 570    | 652   | 322   |
| Solyc10g054010.1.1 | -3.60435 | 4.381945 | 6.39E-15 | 5.45E-13 | 102   | 311   | 240  | 1038   | 2002  | 1297  |
| Solyc11g066150.1.1 | -3.59652 | 5.348153 | 2.83E-16 | 2.86E-14 | 386   | 512   | 307  | 2435   | 4572  | 1819  |
| Solyc05g052660.1.1 | -3.594   | 2.44338  | 2.54E-08 | 6.36E-07 | 23    | 115   | 45   | 565    | 321   | 213   |
| Solyc10g084240.1.1 | -3.59097 | 3.819461 | 3.46E-13 | 2.27E-11 | 133   | 132   | 138  | 1126   | 1340  | 539   |
| Solyc12g096960.1.1 | -3.58931 | 5.473707 | 5.97E-07 | 1.05E-05 | 551   | 739   | 64   | 4824   | 2603  | 1597  |
| Solyc11g006910.1.1 | -3.58704 | 4.574707 | 6.23E-14 | 4.57E-12 | 224   | 257   | 213  | 1132   | 1758  | 1830  |
| Solyc01g105620.2.1 | -3.5857  | 4.211109 | 2.47E-15 | 2.25E-13 | 169   | 290   | 114  | 1229   | 1617  | 992   |
| Solyc03g083680.1.1 | -3.5845  | 5.142951 | 2.20E-12 | 1.28E-10 | 358   | 614   | 136  | 2760   | 2937  | 1642  |
| Solyc11g015900.1.1 | -3.58313 | 5.483283 | 4.07E-10 | 1.50E-08 | 446   | 875   | 120  | 2264   | 4576  | 2585  |
| Solyc11g005470.1.1 | -3.58192 | 2.557947 | 1.29E-10 | 5.29E-09 | 37    | 111   | 44   | 409    | 510   | 301   |
| Solyc03g113070.2.1 | -3.58127 | 4.433705 | 1.77E-11 | 8.78E-10 | 209   | 317   | 134  | 2377   | 1346  | 702   |
| Solyc04g079660.2.1 | -3.5722  | 5.527167 | 9.04E-13 | 5.57E-11 | 200   | 895   | 458  | 1838   | 4873  | 2975  |
| Solyc02g067610.1.1 | -3.57123 | 2.185927 | 2.10E-07 | 4.15E-06 | 28    | 88    | 34   | 542    | 224   | 146   |
| Solyc01g105920.2.1 | -3.56958 | 4.148349 | 8.89E-07 | 1.49E-05 | 311   | 98    | 45   | 907    | 2182  | 799   |
| Solyc02g065590.2.1 | -3.56837 | 3.376584 | 2.51E-11 | 1.21E-09 | 95    | 151   | 74   | 1012   | 757   | 377   |
| Solyc08g075970.2.1 | -3.55924 | 6.950746 | 2.48E-14 | 1.97E-12 | 739   | 1923  | 1315 | 8482   | 11878 | 5769  |
| Solyc11g069640.1.1 | -3.5547  | 2.355763 | 2.95E-07 | 5.61E-06 | 48    | 19    | 72   | 292    | 490   | 284   |
| Solyc03g082450.2.1 | -3.55412 | 2.582616 | 1.10E-08 | 3.02E-07 | 21    | 127   | 59   | 523    | 362   | 309   |
| Solyc05g025820.2.1 | -3.55207 | 6.432016 | 3.27E-12 | 1.84E-10 | 901   | 1317  | 468  | 7199   | 6456  | 4040  |
| Solyc08g005090.1.1 | -3.54749 | 3.30255  | 1.03E-09 | 3.48E-08 | 29    | 165   | 135  | 529    | 794   | 666   |
| Solyc05g006390.1.1 | -3.54723 | 6.468143 | 1.60E-11 | 8.07E-10 | 476   | 2176  | 515  | 5956   | 7174  | 4980  |
| Solyc02g064570.1.1 | -3.54427 | 4.088106 | 5.13E-06 | 6.86E-05 | 301   | 118   | 32   | 1837   | 929   | 649   |
| Solyc10g074800.1.1 | -3.54256 | 0.506287 | 4.65E-05 | 0.000469 | 17    | 21    | 5    | 156    | 73    | 52    |
| Solyc10g084170.1.1 | -3.5387  | 4.622641 | 2.34E-09 | 7.30E-08 | 287   | 418   | 75   | 2448   | 1503  | 1023  |
| Solyc09g011990.1.1 | -3.53849 | 3.977089 | 5.29E-14 | 3.94E-12 | 143   | 214   | 132  | 1340   | 1011  | 807   |
| Solyc11g005700.1.1 | -3.53747 | 5.191187 | 2.00E-15 | 1.83E-13 | 374   | 519   | 241  | 2078   | 3795  | 1876  |
| Solyc06g008100.2.1 | -3.53123 | 4.050466 | 1.07E-07 | 2.28E-06 | 266   | 151   | 46   | 1557   | 1124  | 693   |
| Solyc01g107770.1.1 | -3.53092 | 2.099796 | 2.13E-07 | 4.20E-06 | 32    | 100   | 17   | 168    | 403   | 304   |
| Solyc01g007050.1.1 | -3.51866 | 3.434632 | 9.10E-08 | 1.97E-06 | 144   | 173   | 21   | 670    | 1070  | 537   |
| Solyc01g106410.1.1 | -3.51737 | 2.79523  | 2.14E-10 | 8.44E-09 | 34    | 117   | 81   | 347    | 690   | 410   |
| Solyc07g006100.2.1 | -3.51643 | 2.511161 | 7.99E-09 | 2.27E-07 | 61    | 52    | 55   | 512    | 486   | 197   |
| Solyc01g089990.1.1 | -3.51079 | 0.553641 | 7.48E-06 | 9.52E-05 | 15    | 19    | 11   | 131    | 71    | 81    |
| Solyc06g074530.1.1 | -3.50409 | 7.622647 | 2.97E-12 | 1.68E-10 | 1377  | 4234  | 1300 | 14446  | 17298 | 9279  |
| Solyc12g007050.1.1 | -3.50336 | 6.731319 | 2.88E-11 | 1.36E-09 | 1102  | 1927  | 483  | 7698   | 8659  | 5459  |
| Solyc02g032170.2.1 | -3.50239 | -0.60534 | 0.001269 | 0.007759 | 0     | 18    | 6    | 26     | 45    | 54    |
| Solyc06g062340.2.1 | -3.50035 | 3.794643 | 5.70E-13 | 3.62E-11 | 98    | 280   | 101  | 962    | 893   | 884   |
| Solyc01g107760.2.1 | -3.4998  | 1.331858 | 5.49E-05 | 0.000541 | 26    | 24    | 25   | 25     | 333   | 180   |
| Solyc12g006050.1.1 | -3.49976 | 5.964549 | 2.54E-08 | 6.36E-07 | 975   | 660   | 184  | 4012   | 6541  | 2782  |
| Solyc05g014300.1.1 | -3.4996  | 1.548053 | 0.000335 | 0.002528 | 55    | 14    | 8    | 55     | 195   | 301   |
| Solyc04g005160.1.1 | -3.49207 | 10.08407 | 6.97E-13 | 4.35E-11 | 8338  | 19744 | 8752 | 82614  | 91434 | 50735 |
| Solyc11g067190.1.1 | -3.48979 | 6.128325 | 1.15E-09 | 3.82E-08 | 598   | 1040  | 639  | 2725   | 12019 | 1838  |
| Solyc08g068690.1.1 | -3.48716 | 9.308695 | 1.31E-09 | 4.30E-08 | 2574  | 17521 | 4207 | 44181  | 58623 | 29930 |
| Solyc02g064560.1.1 | -3.48546 | 0.298639 | 0.000796 | 0.005241 | 18    | 19    | 1    | 141    | 40    | 53    |
| Solyc02g071970.1.1 | -3.48225 | 5.164712 | 7.52E-10 | 2.63E-08 | 104   | 1008  | 279  | 1905   | 4002  | 1776  |
| Solyc04g074990.2.1 | -3.48142 | 3.12322  | 9.36E-12 | 4.90E-10 | 64    | 122   | 98   | 474    | 737   | 556   |
| Solyc08g068720.1.1 | -3.47881 | 2.011766 | 5.11E-05 | 0.000509 | 73    | 21    | 15   | 468    | 199   | 135   |
| Solyc03g034240.2.1 | -3.47444 | 1.806147 | 0.000222 | 0.001776 | 69    | 9     | 12   | 101    | 497   | 176   |
| Solyc07g007590.1.1 | -3.47388 | 6.61589  | 6.86E-13 | 4.29E-11 | 870   | 1752  | 699  | 7145   | 10159 | 3729  |
| Solyc10g084960.1.1 | -3.4737  | 4.783567 | 9.70E-14 | 6.96E-12 | 158   | 582   | 244  | 1355   | 2136  | 1991  |
| Solyc08g082900.2.1 | -3.4732  | 5.421194 | 2.46E-12 | 1.41E-10 | 439   | 824   | 195  | 3263   | 3781  | 1892  |
| Solyc05g007930.2.1 | -3.47083 | 5.267201 | 3.22E-15 | 2.88E-13 | 220   | 599   | 483  | 2282   | 4230  | 1748  |
| Solyc02g092880.2.1 | -3.47054 | 2.929924 | 1.27E-07 | 2.64E-06 | 122   | 70    | 30   | 508    | 561   | 457   |
| Solyc02g093520.2.1 | -3.46943 | 7.705686 | 4.67E-13 | 3.01E-11 | 2088  | 3076  | 1630 | 12390  | 19534 | 11434 |
| Solyc09g010980.1.1 | -3.46796 | 3.335213 | 8.92E-10 | 3.07E-08 | 88    | 228   | 43   | 534    | 1170  | 472   |
| Solyc09g056430.2.1 | -3.46291 | 4.02119  | 2.70E-08 | 6.71E-07 | 197   | 220   | 98   | 546    | 755   | 1669  |
| Solyc10g078550.1.1 | -3.45165 | 10.29306 | 3.82E-07 | 7.07E-06 | 20347 | 8361  | 6999 | 133686 | 70272 | 47565 |
| Solyc05g005050.2.1 | -3.44978 | 2.827975 | 2.09E-09 | 6.61E-08 | 87    | 100   | 41   | 578    | 552   | 322   |
| Solyc02g070580.1.1 | -3.44058 | 6.324341 | 8.67E-10 | 3.00E-08 | 1201  | 771   | 436  | 5339   | 7581  | 3843  |
| Solyc03g082520.1.1 | -3.43836 | 4.977008 | 1.66E-05 | 0.000191 | 613   | 248   | 33   | 1970   | 2522  | 1877  |
| Solyc04g012050.2.1 | -3.43641 | 1.092528 | 9.77E-06 | 0.00012  | 11    | 61    | 10   | 200    | 164   | 74    |
| Solyc08g080540.2.1 | -3.4353  | 4.286494 | 2.76E-08 | 6.82E-07 | 265   | 341   | 44   | 1481   | 1767  | 831   |
| Solyc01g111350.2.1 | -3.43504 | 6.303346 | 4.93E-10 | 1.79E-08 | 308   | 959   | 1395 | 4991   | 8173  | 3599  |
| Solyc12g062510.1.1 | -3.43427 | 5.194119 | 7.04E-16 | 6.76E-14 | 254   | 713   | 337  | 2251   | 3881  | 1664  |
| Solyc03g114000.2.1 | -3.42601 | 5.257361 | 2.13E-16 | 2.22E-14 | 267   | 644   | 421  | 2132   | 3676  | 2134  |
| Solyc11g007500.1.1 | -3.42183 | 6.465857 | 2.01E-05 | 0.000225 | 1646  | 869   | 102  | 3914   | 11049 | 4279  |
| Solyc02g090110.2.1 | -3.42167 | 7.859407 | 5.20E-11 | 2.33E-09 | 2786  | 3635  | 1315 | 16226  | 20837 | 11146 |
| Solyc02g087330.2.1 | -3.4124  | 7.520996 | 6.53E-13 | 4.10E-11 | 1902  | 2686  | 1567 | 11773  | 16012 | 9933  |
| Solyc03g112680.1.1 | -3.41125 | 0.659147 | 1.40E-05 | 0.000163 | 5     | 25    | 25   | 124    | 142   | 61    |
| Solyc07g039290.1.1 | -3.41097 | 3.491033 | 1.25E-08 | 3.41E-07 | 129   | 78    | 136  | 343    | 1250  | 756   |
| Solyc08g016290.1.1 | -3.40831 | 1.443755 | 6.60E-06 | 8.54E-05 | 25    | 54    | 17   | 74     | 440   | 107   |
| Solyc04g011540.2.1 | -3.4019  | 5.888327 | 9.85E-14 | 7.05E-12 | 603   | 979   | 458  | 4467   | 4558  | 3000  |
| Solyc03g098090.1.1 | -3.40077 | 2.560017 | 7.39E-06 | 9.41E-05 | 35    | 95    | 77   | 103    | 1149  | 170   |
| Solyc08g082460.2.1 | -3.39699 | 1.171108 | 3.50E-06 | 4.91E-05 | 6     | 48    | 30   | 136    | 204   | 121   |
| Solyc12g055710.1.1 | -3.3963  | 4.716094 | 4.98E-14 | 3.73E-12 | 192   | 613   | 184  | 1732   | 2269  | 1390  |
| Solyc10g045420.1.1 | -3.39194 | 6.831577 | 4.11E-10 | 1.51E-08 | 1306  | 1746  | 809  | 11832  | 7162  | 4047  |
| Solyc05g051540.1.1 | -3.39154 | 2.427612 | 2.28E-05 | 0.00025  | 64    | 116   | 13   | 670    | 322   | 107   |
| Solyc01g095100.2.1 | -3.3909  | 5.043988 | 3.03E-14 | 2.36E-12 | 217   | 772   | 263  | 1790   | 3386  | 1745  |
| Solyc01g086730.2.1 | -3.38742 | 6.722048 | 3.48E-12 | 1.95E-10 | 1053  | 2050  | 679  | 7597   | 8979  | 5137  |
| Solyc01g096930.2.1 | -3.38421 | 7.994285 | 3.34E-13 | 2.21E-11 | 2310  | 4300  | 2362 | 17605  | 21437 | 13155 |
| Solyc11g006730.1.1 | -3.38284 | 2.009327 | 7.57E-07 | 1.29E-05 | 57    | 64    | 14   | 250    | 351   | 220   |
| Solyc03g113080.2.1 | -3.37531 | 4.423443 | 1.66E-10 | 6.68E-09 | 292   | 241   | 159  | 2098   | 1527  | 760   |
| Solyc12g006850.1.1 | -3.3753  | 6.429719 | 1.69E-13 | 1.18E-11 | 783   | 1555  | 746  | 6002   | 8531  | 3655  |

|                    |          |          |          |          |       |       |       |       |        |       |
|--------------------|----------|----------|----------|----------|-------|-------|-------|-------|--------|-------|
| Solyc03g117990.1.1 | -3.37463 | 1.138763 | 5.75E-06 | 7.59E-05 | 8     | 39    | 33    | 208   | 147    | 87    |
| Solyc06g062330.1.1 | -3.37143 | 6.253433 | 2.33E-12 | 1.35E-10 | 770   | 1471  | 510   | 5349  | 5470   | 4404  |
| Solyc03g025670.2.1 | -3.37135 | 8.568004 | 5.84E-11 | 2.58E-09 | 2196  | 8702  | 3686  | 17162 | 42386  | 20836 |
| Solyc07g064870.2.1 | -3.3694  | 3.801461 | 9.16E-10 | 3.14E-08 | 203   | 153   | 91    | 1228  | 875    | 670   |
| Solyc07g045100.1.1 | -3.36802 | 7.249528 | 3.49E-09 | 1.06E-07 | 1808  | 3062  | 610   | 12007 | 14100  | 5848  |
| Solyc09g007790.1.1 | -3.36734 | 5.812634 | 1.80E-07 | 3.61E-06 | 964   | 369   | 345   | 5739  | 3583   | 2035  |
| Solyc11g010430.1.1 | -3.36652 | 5.345538 | 2.84E-16 | 2.87E-14 | 314   | 753   | 414   | 2451  | 3551   | 2302  |
| Solyc04g075000.1.1 | -3.36367 | 5.291743 | 3.87E-15 | 3.43E-13 | 399   | 557   | 399   | 2994  | 2731   | 2100  |
| Solyc05g013710.2.1 | -3.35902 | 5.065161 | 2.34E-08 | 5.92E-07 | 575   | 349   | 128   | 2859  | 2702   | 1335  |
| Solyc05g025680.1.1 | -3.35556 | 2.429175 | 9.60E-06 | 0.000118 | 76    | 41    | 51    | 631   | 143    | 242   |
| Solyc02g092860.2.1 | -3.35231 | 6.942897 | 4.74E-07 | 8.54E-06 | 2227  | 1077  | 475   | 6285  | 8387   | 9238  |
| Solyc03g034360.2.1 | -3.35185 | 2.653025 | 2.17E-05 | 0.000239 | 19    | 244   | 19    | 242   | 706    | 374   |
| Solyc08g067610.2.1 | -3.3447  | 7.09728  | 2.92E-07 | 5.55E-06 | 1639  | 3234  | 293   | 9987  | 10047  | 7424  |
| Solyc06g071070.1.1 | -3.33273 | 7.948429 | 8.37E-09 | 2.36E-07 | 3937  | 2555  | 1463  | 19703 | 18433  | 11813 |
| Solyc01g099910.2.1 | -3.33137 | 6.670158 | 2.66E-05 | 0.000287 | 2154  | 653   | 203   | 9177  | 6687   | 4537  |
| Solyc05g051710.2.1 | -3.3305  | 3.77464  | 6.77E-13 | 4.24E-11 | 148   | 245   | 102   | 881   | 1275   | 676   |
| Solyc06g076090.2.1 | -3.3305  | 1.037608 | 1.91E-06 | 2.92E-05 | 23    | 36    | 14    | 159   | 170    | 89    |
| Solyc03g034250.2.1 | -3.32865 | 5.834809 | 9.96E-14 | 7.11E-12 | 569   | 896   | 570   | 3569  | 6197   | 2405  |
| Solyc04g054690.2.1 | -3.32433 | 5.134071 | 1.45E-08 | 3.87E-07 | 499   | 633   | 117   | 3225  | 2910   | 1161  |
| Solyc04g009900.2.1 | -3.32354 | 5.95721  | 2.09E-11 | 1.03E-09 | 341   | 1173  | 845   | 2538  | 6460   | 3878  |
| Solyc01g066940.2.1 | -3.32341 | 6.185332 | 3.18E-13 | 2.10E-11 | 652   | 1411  | 654   | 5739  | 5722   | 3357  |
| Solyc05g025690.1.1 | -3.31846 | 0.853196 | 5.70E-05 | 0.00056  | 20    | 12    | 26    | 201   | 91     | 62    |
| Solyc01g058250.1.1 | -3.31632 | 5.378265 | 3.22E-10 | 1.23E-08 | 171   | 712   | 689   | 1578  | 4435   | 2627  |
| Solyc06g065530.2.1 | -3.316   | 3.115906 | 6.61E-07 | 1.15E-05 | 141   | 130   | 25    | 620   | 541    | 530   |
| Solyc12g088390.1.1 | -3.31423 | 6.896575 | 2.73E-12 | 1.55E-10 | 1176  | 2388  | 910   | 8192  | 9170   | 6582  |
| Solyc06g007930.2.1 | -3.31283 | 7.617806 | 1.02E-12 | 6.24E-11 | 1470  | 3702  | 2237  | 11806 | 17846  | 10656 |
| Solyc01g098960.1.1 | -3.3109  | -1.11571 | 0.001021 | 0.006454 | 2     | 7     | 7     | 41    | 20     | 24    |
| Solyc08g068700.1.1 | -3.31081 | 7.950516 | 3.67E-06 | 5.11E-05 | 4408  | 2725  | 893   | 28592 | 11286  | 8711  |
| Solyc07g006770.2.1 | -3.30563 | 4.766871 | 1.07E-13 | 7.64E-12 | 231   | 613   | 215   | 1318  | 2840   | 1520  |
| Solyc08g079420.2.1 | -3.30221 | 8.731884 | 2.48E-11 | 1.20E-09 | 4943  | 7576  | 3033  | 25727 | 37919  | 23294 |
| Solyc11g068380.1.1 | -3.30139 | 3.530718 | 2.87E-09 | 8.82E-08 | 157   | 155   | 87    | 1130  | 880    | 366   |
| Solyc05g052890.2.1 | -3.30108 | -0.27693 | 0.000811 | 0.00532  | 15    | 8     | 3     | 85    | 53     | 25    |
| Solyc05g044490.2.1 | -3.30072 | 4.449985 | 5.19E-10 | 1.87E-08 | 337   | 188   | 183   | 1002  | 2149   | 1339  |
| Solyc05g056410.1.1 | -3.30009 | 0.687747 | 2.62E-05 | 0.000284 | 20    | 14    | 19    | 150   | 84     | 77    |
| Solyc08g005950.2.1 | -3.29893 | 1.838799 | 2.54E-07 | 4.93E-06 | 39    | 32    | 49    | 259   | 257    | 194   |
| Solyc06g053150.1.1 | -3.29623 | 5.445518 | 6.23E-14 | 4.57E-12 | 514   | 737   | 332   | 2635  | 4138   | 2238  |
| Solyc02g093270.2.1 | -3.2951  | 9.206563 | 2.46E-12 | 1.41E-10 | 5899  | 10052 | 5807  | 34500 | 52499  | 33459 |
| Solyc03g078490.2.1 | -3.29319 | 9.945507 | 1.23E-08 | 3.36E-07 | 11362 | 18559 | 6716  | 27305 | 131106 | 55331 |
| Solyc01g107090.2.1 | -3.29283 | 6.966296 | 2.13E-11 | 1.04E-09 | 1168  | 2885  | 851   | 6741  | 11698  | 7194  |
| Solyc10g009140.2.1 | -3.29103 | 0.517394 | 8.92E-05 | 0.00082  | 10    | 13    | 26    | 42    | 129    | 111   |
| Solyc02g031990.1.1 | -3.28609 | 5.622338 | 7.33E-07 | 1.26E-05 | 886   | 673   | 110   | 3899  | 3842   | 2259  |
| Solyc10g081980.1.1 | -3.28516 | 7.982563 | 9.61E-10 | 3.27E-08 | 1595  | 7441  | 1692  | 15369 | 24464  | 12659 |
| Solyc08g068660.1.1 | -3.27831 | -0.42083 | 0.000168 | 0.001406 | 6     | 16    | 6     | 67    | 49     | 30    |
| Solyc02g088220.2.1 | -3.27539 | 5.832552 | 2.17E-10 | 8.54E-09 | 832   | 845   | 337   | 4285  | 4556   | 2727  |
| Solyc05g051530.2.1 | -3.27436 | 5.649222 | 3.32E-08 | 8.04E-07 | 615   | 1072  | 234   | 5588  | 3232   | 1375  |
| Solyc11g045460.1.1 | -3.27072 | 3.109973 | 2.92E-09 | 8.97E-08 | 91    | 194   | 52    | 517   | 591    | 576   |
| Solyc01g107100.2.1 | -3.26567 | 6.427695 | 1.47E-12 | 8.79E-11 | 792   | 1775  | 784   | 5671  | 6069   | 5237  |
| Solyc02g090400.2.1 | -3.26244 | 2.684521 | 1.08E-06 | 1.76E-05 | 107   | 91    | 26    | 322   | 836    | 248   |
| Solyc05g005060.2.1 | -3.2592  | 3.267243 | 1.57E-08 | 4.15E-07 | 149   | 147   | 47    | 611   | 762    | 553   |
| Solyc03g121420.2.1 | -3.25872 | 3.610939 | 1.23E-09 | 4.08E-08 | 87    | 249   | 145   | 671   | 1753   | 332   |
| Solyc12g014500.1.1 | -3.2503  | -0.46098 | 0.000451 | 0.003243 | 1     | 17    | 11    | 47    | 56     | 39    |
| Solyc03g025870.2.1 | -3.24867 | -0.11802 | 0.000679 | 0.004576 | 16    | 11    | 4     | 96    | 41     | 38    |
| Solyc05g056400.2.1 | -3.24707 | 2.22826  | 0.000687 | 0.004624 | 84    | 38    | 31    | 711   | 52     | 115   |
| Solyc02g078370.1.1 | -3.24352 | 0.113811 | 0.000243 | 0.001923 | 17    | 19    | 3     | 86    | 72     | 53    |
| Solyc04g040180.2.1 | -3.23875 | 10.29216 | 1.46E-09 | 4.75E-08 | 18761 | 16817 | 8954  | 92500 | 102237 | 59905 |
| Solyc04g050790.2.1 | -3.23809 | 2.332908 | 2.62E-07 | 5.07E-06 | 58    | 106   | 32    | 185   | 651    | 250   |
| Solyc11g005480.1.1 | -3.22908 | 6.917551 | 4.18E-11 | 1.93E-09 | 1178  | 2434  | 1152  | 11052 | 8705   | 4690  |
| Solyc05g010470.2.1 | -3.22594 | 6.354522 | 5.27E-11 | 2.36E-09 | 1164  | 1154  | 646   | 5571  | 7373   | 3869  |
| Solyc07g043320.2.1 | -3.22447 | 9.714616 | 9.36E-10 | 3.19E-08 | 11964 | 13740 | 5439  | 51754 | 83464  | 39701 |
| Solyc12g040570.1.1 | -3.22446 | 5.707006 | 4.23E-13 | 2.75E-11 | 464   | 1172  | 481   | 4092  | 4348   | 2240  |
| Solyc03g117980.2.1 | -3.22337 | 10.22715 | 1.61E-11 | 8.10E-10 | 9611  | 26381 | 12714 | 85827 | 98200  | 58919 |
| Solyc04g079250.2.1 | -3.22165 | 4.199666 | 8.53E-07 | 1.44E-05 | 81    | 648   | 120   | 434   | 2591   | 990   |
| Solyc02g067800.2.1 | -3.22104 | 1.479632 | 4.73E-05 | 0.000476 | 16    | 80    | 24    | 48    | 272    | 233   |
| Solyc10g081320.1.1 | -3.2161  | -0.2707  | 0.000442 | 0.003185 | 2     | 20    | 12    | 70    | 41     | 45    |
| Solyc11g008640.1.1 | -3.21583 | 1.573826 | 8.46E-07 | 1.43E-05 | 17    | 67    | 38    | 163   | 202    | 209   |
| Solyc01g107860.2.1 | -3.21352 | 7.574879 | 2.41E-12 | 1.39E-10 | 1691  | 3369  | 2388  | 12071 | 17808  | 9373  |
| Solyc02g069600.2.1 | -3.2111  | 0.839463 | 1.20E-05 | 0.000143 | 14    | 49    | 12    | 129   | 177    | 66    |
| Solyc06g036290.2.1 | -3.20073 | 3.513673 | 1.15E-06 | 1.87E-05 | 156   | 144   | 115   | 1498  | 477    | 267   |
| Solyc08g008150.1.1 | -3.19921 | 3.479083 | 3.47E-09 | 1.05E-07 | 87    | 319   | 78    | 458   | 1054   | 739   |
| Solyc01g098840.2.1 | -3.19075 | 8.056798 | 7.73E-09 | 2.21E-07 | 3705  | 3990  | 2259  | 27026 | 14335  | 10841 |
| Solyc07g062630.1.1 | -3.18655 | 0.928726 | 3.67E-05 | 0.000382 | 10    | 64    | 12    | 146   | 183    | 66    |
| Solyc12g005940.1.1 | -3.18589 | 7.442794 | 4.82E-05 | 0.000483 | 4073  | 921   | 520   | 13660 | 16494  | 6207  |
| Solyc03g026230.1.1 | -3.1781  | 4.784423 | 6.55E-11 | 2.87E-09 | 324   | 625   | 179   | 1339  | 3488   | 1143  |
| Solyc03g118450.1.1 | -3.17796 | 4.118972 | 3.99E-10 | 1.48E-08 | 185   | 469   | 88    | 1042  | 1608   | 901   |
| Solyc12g014010.1.1 | -3.17488 | 7.120043 | 2.08E-05 | 0.000231 | 3105  | 1149  | 375   | 11781 | 8299   | 7073  |
| Solyc09g083090.2.1 | -3.17466 | 4.48157  | 6.09E-08 | 1.38E-06 | 430   | 238   | 112   | 1074  | 2278   | 1252  |
| Solyc04g071090.2.1 | -3.1741  | 1.287591 | 0.000689 | 0.004635 | 6     | 77    | 29    | 160   | 32     | 227   |
| Solyc05g008820.2.1 | -3.17176 | 5.173304 | 4.79E-14 | 3.61E-12 | 359   | 811   | 325   | 2023  | 3273   | 2025  |
| Solyc01g096510.2.1 | -3.1715  | 6.874367 | 3.07E-10 | 1.18E-08 | 827   | 3452  | 963   | 7029  | 10154  | 6505  |
| Solyc09g011860.2.1 | -3.16799 | 5.323295 | 8.84E-10 | 3.05E-08 | 460   | 1058  | 187   | 2305  | 4446   | 1725  |
| Solyc03g119230.1.1 | -3.16739 | 2.141883 | 2.83E-07 | 5.40E-06 | 48    | 113   | 25    | 305   | 376    | 212   |
| Solyc01g104740.2.1 | -3.16268 | 5.388804 | 9.67E-05 | 0.000878 | 998   | 228   | 122   | 1062  | 3460   | 3592  |
| Solyc02g093040.2.1 | -3.16227 | 2.249948 | 5.19E-05 | 0.000516 | 73    | 41    | 54    | 610   | 133    | 157   |
| Solyc06g005480.2.1 | -3.16161 | 5.716069 | 3.60E-10 | 1.35E-08 | 808   | 907   | 309   | 3177  | 4978   | 2636  |



|                    |          |          |          |          |       |       |       |        |        |        |
|--------------------|----------|----------|----------|----------|-------|-------|-------|--------|--------|--------|
| Solyc09g011330.1.1 | -3.15547 | 6.049518 | 9.61E-08 | 2.06E-06 | 1166  | 1027  | 289   | 5602   | 4108   | 3268   |
| Solyc01g087020.2.1 | -3.15289 | 4.811799 | 1.24E-14 | 1.03E-12 | 263   | 609   | 299   | 1770   | 2616   | 1371   |
| Solyc11g073060.1.1 | -3.15025 | 2.242173 | 0.000245 | 0.001936 | 80    | 95    | 11    | 159    | 156    | 508    |
| Solyc03g097570.2.1 | -3.14412 | 2.233457 | 0.001032 | 0.006505 | 115   | 14    | 19    | 156    | 828    | 113    |
| Solyc02g091070.2.1 | -3.14379 | 5.61756  | 8.12E-05 | 0.000758 | 1221  | 165   | 165   | 3475   | 3854   | 2499   |
| Solyc06g069040.2.1 | -3.14217 | 4.752475 | 1.16E-09 | 3.87E-08 | 179   | 844   | 218   | 2385   | 1502   | 1338   |
| Solyc12g010940.1.1 | -3.13864 | 1.673179 | 0.000133 | 0.001154 | 3     | 101   | 46    | 149    | 345    | 167    |
| Solyc11g008200.1.1 | -3.13804 | 3.717079 | 2.11E-08 | 5.39E-07 | 149   | 355   | 67    | 1224   | 949    | 476    |
| Solyc02g067440.2.1 | -3.13689 | -0.0436  | 0.000233 | 0.001859 | 4     | 19    | 17    | 47     | 60     | 74     |
| Solyc02g072400.1.1 | -3.1367  | 1.941643 | 1.49E-05 | 0.000173 | 35    | 87    | 40    | 484    | 187    | 86     |
| Solyc05g008640.1.1 | -3.13624 | 3.859905 | 8.01E-11 | 3.43E-09 | 146   | 287   | 165   | 546    | 1820   | 734    |
| Solyc01g057910.2.1 | -3.13516 | 4.40346  | 2.12E-11 | 1.04E-09 | 280   | 351   | 202   | 1899   | 1524   | 826    |
| Solyc03g082640.1.1 | -3.13459 | 4.113086 | 1.47E-10 | 5.99E-09 | 101   | 495   | 189   | 843    | 1947   | 848    |
| Solyc12g057130.1.1 | -3.13457 | 0.304396 | 0.001512 | 0.009012 | 30    | 6     | 4     | 74     | 86     | 77     |
| Solyc04g005670.1.1 | -3.13334 | 8.533269 | 1.04E-10 | 4.35E-09 | 4496  | 7654  | 3097  | 23515  | 36656  | 16664  |
| Solyc02g094520.2.1 | -3.13187 | 4.056454 | 2.12E-10 | 8.35E-09 | 203   | 262   | 190   | 1647   | 1013   | 630    |
| Solyc04g009440.2.1 | -3.13084 | 8.914883 | 5.45E-08 | 1.25E-06 | 8629  | 6840  | 2621  | 27711  | 44344  | 26050  |
| Solyc10g011910.2.1 | -3.12436 | 4.78236  | 4.34E-09 | 1.29E-07 | 187   | 972   | 158   | 1488   | 2582   | 1525   |
| Solyc02g080290.2.1 | -3.12416 | 4.90748  | 4.29E-07 | 7.83E-06 | 635   | 267   | 147   | 2414   | 2179   | 1386   |
| Solyc01g106390.2.1 | -3.12311 | 6.888778 | 8.94E-10 | 3.07E-08 | 1120  | 3417  | 794   | 8382   | 10451  | 5351   |
| Solyc11g012240.1.1 | -3.12119 | 2.296543 | 9.56E-06 | 0.000117 | 16    | 109   | 90    | 514    | 258    | 185    |
| Solyc03g112340.1.1 | -3.12093 | 7.505955 | 1.12E-09 | 3.74E-08 | 1757  | 5142  | 1243  | 10412  | 16422  | 9969   |
| Solyc01g105280.2.1 | -3.1189  | 7.936178 | 4.26E-11 | 1.96E-09 | 2575  | 5035  | 2636  | 19488  | 20012  | 10207  |
| Solyc11g068920.1.1 | -3.11759 | 0.911771 | 0.00086  | 0.005591 | 2     | 78    | 15    | 52     | 236    | 107    |
| Solyc10g086280.1.1 | -3.11426 | 9.379525 | 1.97E-09 | 6.29E-08 | 9704  | 12672 | 4543  | 47175  | 56714  | 31145  |
| Solyc08g079480.2.1 | -3.10894 | 3.136533 | 1.83E-06 | 2.81E-05 | 173   | 104   | 46    | 457    | 550    | 658    |
| Solyc02g071220.2.1 | -3.1037  | 6.21285  | 2.22E-11 | 1.09E-09 | 881   | 1649  | 619   | 4039   | 7161   | 3957   |
| Solyc05g054820.1.1 | -3.10323 | 2.021667 | 0.000193 | 0.001581 | 42    | 142   | 7     | 441    | 260    | 111    |
| Solyc04g071770.2.1 | -3.1013  | 6.491935 | 1.11E-08 | 3.04E-07 | 1441  | 1439  | 654   | 8472   | 6052   | 3417   |
| Solyc02g078380.2.1 | -3.09643 | 7.227945 | 5.68E-10 | 2.04E-08 | 1725  | 3126  | 1478  | 10558  | 7886   | 9847   |
| Solyc04g077630.2.1 | -3.09633 | 3.963558 | 1.27E-08 | 3.44E-07 | 91    | 498   | 151   | 529    | 1650   | 1007   |
| Solyc12g087790.1.1 | -3.09382 | 2.561486 | 1.47E-07 | 3.00E-06 | 60    | 168   | 38    | 277    | 604    | 328    |
| Solyc09g014990.2.1 | -3.09052 | 8.351708 | 2.46E-08 | 6.19E-07 | 4282  | 8476  | 1559  | 21280  | 30404  | 15203  |
| Solyc08g068790.1.1 | -3.09032 | 2.616451 | 1.51E-07 | 3.07E-06 | 87    | 122   | 44    | 530    | 374    | 290    |
| Solyc02g079510.2.1 | -3.08924 | 2.236223 | 3.06E-07 | 5.78E-06 | 36    | 85    | 77    | 190    | 573    | 233    |
| Solyc03g115860.2.1 | -3.0885  | 7.18234  | 8.30E-10 | 2.88E-08 | 1954  | 2289  | 1580  | 13114  | 9418   | 6151   |
| Solyc05g010720.2.1 | -3.08649 | 3.959491 | 9.50E-10 | 3.23E-08 | 199   | 367   | 104   | 720    | 1221   | 1091   |
| Solyc03g097100.1.1 | -3.07389 | -0.28465 | 0.000549 | 0.003816 | 10    | 21    | 4     | 28     | 89     | 48     |
| Solyc09g090470.2.1 | -3.07045 | 5.152942 | 7.84E-12 | 4.17E-10 | 459   | 808   | 268   | 2515   | 2598   | 1897   |
| Solyc05g014980.2.1 | -3.06536 | 7.65646  | 4.87E-11 | 2.20E-09 | 2015  | 4154  | 2550  | 9816   | 18953  | 11938  |
| Solyc03g020000.2.1 | -3.06512 | 2.958116 | 2.27E-05 | 0.000249 | 154   | 56    | 70    | 904    | 364    | 240    |
| Solyc04g006930.2.1 | -3.06436 | 2.103816 | 2.23E-07 | 4.38E-06 | 50    | 65    | 60    | 359    | 290    | 195    |
| Solyc01g094980.1.1 | -3.06392 | -0.4691  | 0.000449 | 0.00323  | 3     | 19    | 10    | 49     | 66     | 29     |
| Solyc10g074570.1.1 | -3.06226 | 7.415133 | 6.38E-10 | 2.26E-08 | 2515  | 2950  | 1525  | 12343  | 15492  | 7117   |
| Solyc03g119980.2.1 | -3.06195 | 6.397887 | 1.23E-11 | 6.28E-10 | 674   | 1708  | 1298  | 5581   | 7752   | 3879   |
| Solyc03g122340.2.1 | -3.05649 | 8.17637  | 1.32E-10 | 5.38E-09 | 2334  | 6251  | 4218  | 14617  | 31385  | 14215  |
| Solyc12g009220.1.1 | -3.05549 | 8.809393 | 1.04E-10 | 4.37E-09 | 5008  | 10283 | 4457  | 28174  | 44476  | 19985  |
| Solyc03g006770.2.1 | -3.05433 | 3.401343 | 2.75E-06 | 3.97E-05 | 214   | 125   | 61    | 1081   | 569    | 404    |
| Solyc02g071780.2.1 | -3.05136 | 6.393776 | 1.01E-11 | 5.27E-10 | 939   | 1791  | 929   | 6124   | 7456   | 3561   |
| Solyc01g106620.2.1 | -3.0509  | 11.78187 | 1.90E-05 | 0.000214 | 82552 | 31144 | 13314 | 278742 | 221244 | 183697 |
| Solyc01g079780.2.1 | -3.04706 | 6.525733 | 8.63E-12 | 4.54E-10 | 1072  | 1618  | 1194  | 5737   | 7429   | 5119   |
| Solyc06g005820.2.1 | -3.04435 | 1.22511  | 0.00136  | 0.00824  | 23    | 2     | 60    | 160    | 156    | 134    |
| Solyc04g074950.2.1 | -3.04409 | 5.315449 | 4.80E-12 | 2.62E-10 | 515   | 905   | 323   | 2950   | 3166   | 1852   |
| Solyc05g053790.1.1 | -3.04364 | 1.854402 | 0.000627 | 0.004277 | 86    | 33    | 12    | 442    | 138    | 110    |
| Solyc02g091650.2.1 | -3.04209 | 6.078904 | 4.68E-09 | 1.39E-07 | 1151  | 1100  | 488   | 5408   | 5283   | 2871   |
| Solyc04g074110.2.1 | -3.03796 | 2.996779 | 2.47E-07 | 4.82E-06 | 138   | 86    | 84    | 685    | 494    | 373    |
| Solyc02g087210.2.1 | -3.03673 | 6.39954  | 2.69E-07 | 5.19E-06 | 1481  | 1752  | 325   | 5733   | 5944   | 4791   |
| Solyc04g077310.2.1 | -3.0316  | 5.954026 | 4.89E-12 | 2.66E-10 | 614   | 1522  | 682   | 3487   | 5827   | 3257   |
| Solyc08g077900.2.1 | -3.02589 | 6.773036 | 0.000305 | 0.002333 | 2281  | 2088  | 116   | 12193  | 5109   | 3812   |
| Solyc09g098000.2.1 | -3.02454 | 0.577313 | 0.000347 | 0.002601 | 30    | 17    | 10    | 137    | 68     | 74     |
| Solyc10g055680.1.1 | -3.02289 | 6.405488 | 9.09E-10 | 3.12E-08 | 1139  | 1886  | 705   | 3611   | 9749   | 4358   |
| Solyc09g011390.2.1 | -3.02167 | 3.783516 | 4.88E-09 | 1.44E-07 | 237   | 232   | 98    | 886    | 979    | 811    |
| Solyc01g010430.2.1 | -3.02114 | 6.774453 | 1.05E-10 | 4.37E-09 | 1290  | 2612  | 1027  | 8022   | 9435   | 4717   |
| Solyc06g069720.2.1 | -3.02014 | 0.681513 | 3.58E-05 | 0.000374 | 23    | 20    | 21    | 106    | 160    | 62     |
| Solyc02g079720.1.1 | -3.01179 | 1.253991 | 5.42E-05 | 0.000536 | 47    | 35    | 13    | 145    | 257    | 93     |
| Solyc03g083480.2.1 | -3.01034 | 6.920217 | 1.08E-05 | 0.00013  | 2570  | 2020  | 306   | 9248   | 8438   | 6056   |
| Solyc03g121340.1.1 | -3.00552 | 3.456339 | 2.78E-06 | 4.00E-05 | 58    | 444   | 77    | 374    | 861    | 869    |
| Solyc11g007020.1.1 | -3.00188 | 8.112927 | 2.54E-08 | 6.36E-07 | 1648  | 5667  | 5327  | 24612  | 15920  | 12940  |
| Solyc09g083360.2.1 | -3.00052 | 4.318537 | 8.97E-05 | 0.000822 | 400   | 248   | 138   | 2843   | 435    | 471    |
| Solyc02g014220.2.1 | -3.0005  | 0.482355 | 0.000485 | 0.003439 | 24    | 31    | 5     | 140    | 74     | 53     |
| Solyc03g005570.2.1 | -2.98919 | 6.441531 | 1.03E-09 | 3.47E-08 | 1069  | 2369  | 639   | 6123   | 6623   | 4414   |
| Solyc05g009550.2.1 | -2.98904 | 4.920763 | 9.87E-11 | 4.19E-09 | 242   | 916   | 325   | 1331   | 3548   | 1473   |
| Solyc01g103650.2.1 | -2.98815 | 8.519487 | 3.20E-09 | 9.74E-08 | 5498  | 7966  | 2789  | 24624  | 28893  | 19102  |
| Solyc03g112700.1.1 | -2.98549 | 6.843096 | 2.91E-11 | 1.38E-09 | 1234  | 2564  | 1436  | 8276   | 8955   | 5554   |
| Solyc10g012370.2.1 | -2.98538 | 10.13679 | 1.54E-07 | 3.12E-06 | 20109 | 15915 | 10044 | 106301 | 64063  | 47748  |
| Solyc03g115870.2.1 | -2.98408 | 5.599338 | 2.21E-08 | 5.63E-07 | 786   | 753   | 490   | 5137   | 2751   | 1601   |
| Solyc12g045020.1.1 | -2.98371 | 5.101678 | 1.99E-05 | 0.000223 | 282   | 1511  | 63    | 2143   | 3247   | 1600   |
| Solyc09g011630.2.1 | -2.98049 | 7.003789 | 0.000583 | 0.004015 | 3472  | 1096  | 155   | 11946  | 7635   | 5380   |
| Solyc06g050790.2.1 | -2.97143 | 4.352588 | 3.38E-12 | 1.90E-10 | 171   | 522   | 279   | 1389   | 1578   | 1060   |
| Solyc02g081830.2.1 | -2.96775 | 4.386305 | 7.94E-12 | 4.20E-10 | 303   | 371   | 235   | 1499   | 1654   | 998    |
| Solyc10g074730.1.1 | -2.96751 | 0.89473  | 0.000142 | 0.001219 | 5     | 43    | 40    | 98     | 169    | 102    |
| Solyc01g009780.2.1 | -2.96362 | 6.555335 | 5.10E-11 | 2.29E-09 | 1215  | 2057  | 1002  | 5480   | 8592   | 4856   |
| Solyc06g072330.2.1 | -2.95728 | 4.970415 | 3.86E-05 | 0.000399 | 792   | 216   | 159   | 3081   | 1325   | 1483   |
| Solyc02g062380.1.1 | -2.95625 | 2.625723 | 4.06E-05 | 0.000417 | 149   | 49    | 36    | 331    | 708    | 254    |

|                    |          |          |          |          |       |       |       |        |        |        |
|--------------------|----------|----------|----------|----------|-------|-------|-------|--------|--------|--------|
| Solyc06g065560.1.1 | -2.95588 | 7.940912 | 1.02E-09 | 3.44E-08 | 3432  | 5511  | 2261  | 18042  | 20064  | 11017  |
| Solyc01g100010.2.1 | -2.95509 | 6.715139 | 6.70E-09 | 1.93E-07 | 1722  | 2157  | 780   | 8003   | 8000   | 4807   |
| Solyc07g020870.1.1 | -2.94734 | 5.139069 | 2.23E-09 | 7.00E-08 | 207   | 680   | 754   | 2929   | 2339   | 1607   |
| Solyc02g071090.2.1 | -2.94271 | 3.200127 | 0.000117 | 0.001033 | 13    | 337   | 145   | 269    | 821    | 698    |
| Solyc07g008550.2.1 | -2.93881 | 3.157819 | 1.53E-06 | 2.40E-05 | 170   | 84    | 104   | 774    | 460    | 454    |
| Solyc10g008960.1.1 | -2.93806 | 1.735655 | 6.08E-06 | 7.97E-05 | 55    | 62    | 29    | 132    | 368    | 181    |
| Solyc08g066020.1.1 | -2.93451 | 6.74178  | 1.63E-08 | 4.29E-07 | 1844  | 2068  | 821   | 8730   | 7747   | 4632   |
| Solyc02g083360.1.1 | -2.93314 | 5.645022 | 2.49E-11 | 1.20E-09 | 724   | 1101  | 471   | 2978   | 4511   | 2548   |
| Solyc02g079170.2.1 | -2.93012 | 9.018588 | 5.24E-08 | 1.21E-06 | 9728  | 8523  | 4010  | 35954  | 45666  | 22907  |
| Solyc01g073820.2.1 | -2.92633 | 3.206485 | 5.64E-05 | 0.000554 | 184   | 199   | 28    | 1025   | 499    | 272    |
| Solyc03g112060.2.1 | -2.92608 | 6.792387 | 8.24E-10 | 2.86E-08 | 1778  | 1981  | 1140  | 6998   | 10192  | 5196   |
| Solyc03g006620.2.1 | -2.92474 | 6.402951 | 1.87E-10 | 7.42E-09 | 1047  | 2159  | 845   | 6013   | 7551   | 3552   |
| Solyc02g086900.2.1 | -2.91873 | 6.475388 | 2.12E-09 | 6.71E-08 | 840   | 2255  | 1235  | 4643   | 5181   | 6692   |
| Solyc03g098730.1.1 | -2.91851 | 9.112784 | 3.11E-06 | 4.42E-05 | 11555 | 10370 | 2183  | 41501  | 44022  | 24565  |
| Solyc08g066420.1.1 | -2.91499 | 4.123161 | 1.14E-10 | 4.73E-09 | 150   | 488   | 230   | 1371   | 1134   | 863    |
| Solyc12g007100.1.1 | -2.91438 | 5.998008 | 1.81E-10 | 7.18E-09 | 958   | 1270  | 678   | 4608   | 5622   | 2666   |
| Solyc10g006450.2.1 | -2.90987 | 2.390333 | 8.99E-08 | 1.94E-06 | 60    | 126   | 64    | 323    | 508    | 233    |
| Solyc11g010730.1.1 | -2.90736 | 5.115654 | 1.90E-11 | 9.41E-10 | 402   | 880   | 397   | 1429   | 3838   | 1858   |
| Solyc04g051500.2.1 | -2.90617 | 7.733859 | 1.03E-09 | 3.48E-08 | 1649  | 5702  | 3277  | 13420  | 19591  | 9937   |
| Solyc01g067750.2.1 | -2.90113 | 8.602538 | 2.11E-08 | 5.40E-07 | 7108  | 5941  | 3805  | 27388  | 33249  | 17234  |
| Solyc10g080050.1.1 | -2.89973 | -0.96749 | 0.001562 | 0.009251 | 6     | 12    | 5     | 33     | 54     | 15     |
| Solyc12g005850.1.1 | -2.89945 | 6.334061 | 4.26E-10 | 1.56E-08 | 1228  | 1634  | 844   | 4084   | 7583   | 4481   |
| Solyc12g057160.1.1 | -2.89812 | 3.559077 | 1.49E-06 | 2.35E-05 | 123   | 431   | 69    | 353    | 1485   | 632    |
| Solyc11g010710.1.1 | -2.89268 | 2.74315  | 7.01E-08 | 1.56E-06 | 89    | 150   | 77    | 343    | 789    | 272    |
| Solyc04g011690.2.1 | -2.88984 | 5.909806 | 8.62E-07 | 1.45E-05 | 1387  | 688   | 397   | 4220   | 5184   | 2643   |
| Solyc07g005100.2.1 | -2.88825 | 7.452664 | 4.04E-10 | 1.50E-08 | 2403  | 3748  | 2083  | 9614   | 16452  | 9110   |
| Solyc07g008930.1.1 | -2.88733 | 1.549212 | 0.000106 | 0.000949 | 26    | 121   | 13    | 255    | 215    | 107    |
| Solyc03g116900.2.1 | -2.88535 | 8.28212  | 1.09E-07 | 2.31E-06 | 4905  | 7470  | 2423  | 10773  | 36445  | 17150  |
| Solyc01g080890.2.1 | -2.88469 | 5.650968 | 4.20E-11 | 1.94E-09 | 777   | 914   | 596   | 3516   | 4179   | 2303   |
| Solyc07g045030.2.1 | -2.88079 | 3.398821 | 1.03E-06 | 1.69E-05 | 55    | 448   | 94    | 788    | 878    | 440    |
| Solyc09g011560.2.1 | -2.88038 | 6.527211 | 5.89E-09 | 1.72E-07 | 1245  | 2703  | 675   | 5470   | 8261   | 4686   |
| Solyc04g074470.1.1 | -2.88012 | 5.886985 | 4.05E-09 | 1.22E-07 | 1039  | 1121  | 527   | 4438   | 4019   | 2990   |
| Solyc01g096790.2.1 | -2.87951 | 3.510521 | 3.20E-08 | 7.79E-07 | 187   | 212   | 102   | 405    | 1232   | 674    |
| Solyc01g087850.2.1 | -2.87866 | 9.013419 | 2.20E-09 | 6.92E-08 | 5169  | 11441 | 8411  | 39064  | 31515  | 27947  |
| Solyc08g078050.1.1 | -2.87843 | 6.124829 | 2.98E-10 | 1.15E-08 | 662   | 1914  | 944   | 3217   | 7536   | 3550   |
| Solyc02g090150.1.1 | -2.87373 | 1.024641 | 0.000186 | 0.001528 | 39    | 15    | 29    | 148    | 201    | 66     |
| Solyc12g011160.1.1 | -2.8722  | 8.523279 | 2.45E-10 | 9.61E-09 | 4305  | 8498  | 5051  | 21995  | 32781  | 18622  |
| Solyc11g016930.1.1 | -2.86985 | 3.454396 | 2.84E-08 | 7.00E-07 | 201   | 198   | 96    | 578    | 968    | 619    |
| Solyc09g056390.1.1 | -2.86807 | 6.169219 | 4.70E-09 | 1.39E-07 | 1103  | 1464  | 798   | 6577   | 4592   | 2836   |
| Solyc04g014640.1.1 | -2.86444 | -0.22667 | 0.000495 | 0.003488 | 6     | 29    | 9     | 42     | 85     | 42     |
| Solyc04g054710.2.1 | -2.85982 | 9.625476 | 7.84E-10 | 2.73E-08 | 8293  | 18073 | 12387 | 56901  | 62306  | 36641  |
| Solyc01g099860.2.1 | -2.85905 | 5.895465 | 2.57E-11 | 1.23E-09 | 708   | 1349  | 839   | 3846   | 5717   | 2527   |
| Solyc10g008700.1.1 | -2.85759 | 0.805323 | 5.58E-05 | 0.000549 | 19    | 27    | 34    | 129    | 106    | 94     |
| Solyc05g007950.2.1 | -2.85603 | 3.43296  | 2.40E-06 | 3.53E-05 | 237   | 105   | 108   | 495    | 1342   | 443    |
| Solyc04g045600.2.1 | -2.85222 | 6.689461 | 5.24E-08 | 1.21E-06 | 1625  | 1843  | 1298  | 10348  | 5733   | 3796   |
| Solyc01g102530.2.1 | -2.85089 | 6.314401 | 4.83E-11 | 2.18E-09 | 949   | 1843  | 1111  | 4698   | 7000   | 4105   |
| Solyc10g076600.1.1 | -2.85072 | 7.434117 | 3.01E-10 | 1.16E-08 | 2219  | 3985  | 2235  | 10688  | 15527  | 8351   |
| Solyc10g082020.1.1 | -2.85032 | 0.238084 | 0.000331 | 0.002504 | 8     | 31    | 20    | 38     | 115    | 77     |
| Solyc08g080130.2.1 | -2.84849 | 9.251662 | 8.21E-09 | 2.33E-07 | 9289  | 15122 | 5413  | 42593  | 49849  | 28243  |
| Solyc12g008670.1.1 | -2.84597 | 0.755635 | 0.00023  | 0.001833 | 33    | 36    | 9     | 81     | 135    | 107    |
| Solyc05g018180.2.1 | -2.84566 | 6.497384 | 1.15E-10 | 4.77E-09 | 1187  | 2127  | 1116  | 5873   | 7976   | 4198   |
| Solyc05g014320.2.1 | -2.84336 | 4.85824  | 1.20E-12 | 7.25E-11 | 361   | 697   | 375   | 1712   | 2528   | 1505   |
| Solyc08g080860.2.1 | -2.83521 | 3.936561 | 3.01E-07 | 5.70E-06 | 298   | 231   | 156   | 1535   | 847    | 559    |
| Solyc02g086590.2.1 | -2.83394 | 6.704952 | 3.50E-10 | 1.32E-08 | 1262  | 2809  | 1231  | 5663   | 9386   | 5642   |
| Solyc09g014600.1.1 | -2.83266 | 1.686552 | 0.000204 | 0.001658 | 14    | 44    | 95    | 289    | 152    | 158    |
| Solyc02g092580.2.1 | -2.8313  | 10.21673 | 8.69E-06 | 0.000108 | 28086 | 14036 | 8632  | 107786 | 61399  | 55580  |
| Solyc04g082500.2.1 | -2.83128 | 5.267447 | 3.17E-11 | 1.48E-09 | 550   | 989   | 383   | 2597   | 2889   | 2001   |
| Solyc02g071690.1.1 | -2.82898 | 0.308396 | 0.000736 | 0.004905 | 20    | 25    | 13    | 34     | 73     | 114    |
| Solyc05g052750.2.1 | -2.82878 | 6.391582 | 1.48E-08 | 3.94E-07 | 1562  | 1684  | 693   | 5545   | 7212   | 3927   |
| Solyc04g081960.1.1 | -2.82466 | 4.362743 | 1.43E-11 | 7.28E-10 | 262   | 542   | 238   | 1309   | 1846   | 954    |
| Solyc08g006330.2.1 | -2.82214 | 7.10441  | 3.96E-08 | 9.37E-07 | 2671  | 2484  | 1199  | 8519   | 12750  | 6353   |
| Solyc04g016420.2.1 | -2.82118 | 3.142254 | 7.99E-07 | 1.35E-05 | 54    | 346   | 101   | 429    | 689    | 576    |
| Solyc12g098780.1.1 | -2.82041 | 6.892672 | 1.48E-09 | 4.79E-08 | 1443  | 2720  | 1744  | 10091  | 8048   | 4969   |
| Solyc09g064510.2.1 | -2.81762 | 6.95759  | 4.22E-10 | 1.55E-08 | 1676  | 3103  | 1463  | 7847   | 11520  | 5605   |
| Solyc09g098510.2.1 | -2.81382 | 11.47045 | 6.30E-09 | 1.82E-07 | 34665 | 58707 | 45904 | 224967 | 173298 | 142449 |
| Solyc08g007980.2.1 | -2.81291 | 2.210291 | 9.64E-07 | 1.59E-05 | 67    | 79    | 72    | 262    | 334    | 285    |
| Solyc05g008990.2.1 | -2.8125  | 4.310187 | 2.65E-11 | 1.26E-09 | 195   | 566   | 279   | 1144   | 1670   | 1077   |
| Solyc07g056440.2.1 | -2.80996 | 3.805787 | 1.67E-10 | 6.71E-09 | 146   | 344   | 222   | 735    | 1148   | 833    |
| Solyc08g008110.2.1 | -2.80863 | 5.411609 | 1.29E-10 | 5.31E-09 | 642   | 1043  | 439   | 3237   | 3552   | 1692   |
| Solyc11g072630.1.1 | -2.80607 | 4.763044 | 5.63E-06 | 7.45E-05 | 699   | 204   | 218   | 1341   | 2700   | 1415   |
| Solyc07g045090.2.1 | -2.80116 | 0.286785 | 0.000216 | 0.001732 | 18    | 33    | 10    | 64     | 103    | 68     |
| Solyc07g043510.2.1 | -2.8004  | 5.204338 | 3.31E-10 | 1.26E-08 | 667   | 638   | 421   | 2160   | 3519   | 1729   |
| Solyc05g007940.2.1 | -2.80006 | 4.360944 | 5.55E-06 | 7.35E-05 | 372   | 316   | 259   | 904    | 3465   | 335    |
| Solyc03g025680.2.1 | -2.79565 | 5.427695 | 3.22E-10 | 1.23E-08 | 545   | 1294  | 435   | 1958   | 4631   | 2174   |
| Solyc08g076390.2.1 | -2.79516 | 6.41184  | 3.72E-09 | 1.12E-07 | 1488  | 1658  | 931   | 5938   | 7579   | 3536   |
| Solyc03g123680.1.1 | -2.79266 | 6.638725 | 4.79E-09 | 1.42E-07 | 1286  | 3119  | 909   | 6015   | 8071   | 5359   |
| Solyc06g007180.2.1 | -2.79191 | 7.453388 | 0.001122 | 0.006997 | 4934  | 2105  | 445   | 22780  | 6916   | 3702   |
| Solyc01g058720.2.1 | -2.79142 | 6.415813 | 2.10E-05 | 0.000233 | 2280  | 998   | 389   | 4671   | 7950   | 4384   |
| Solyc08g082790.2.1 | -2.78619 | -0.87745 | 0.001464 | 0.008766 | 6     | 12    | 8     | 29     | 60     | 19     |
| Solyc08g008100.2.1 | -2.78602 | 7.931154 | 1.44E-08 | 3.86E-07 | 3894  | 6047  | 2366  | 18507  | 19887  | 9968   |
| Solyc08g078070.2.1 | -2.78205 | 8.483671 | 1.57E-09 | 5.07E-08 | 3550  | 9778  | 5609  | 23374  | 31617  | 16255  |
| Solyc09g007900.2.1 | -2.78158 | 9.002301 | 1.36E-06 | 2.16E-05 | 6171  | 19128 | 3438  | 47719  | 34996  | 17651  |
| RRNA_11_11         | -2.78074 | 0.376686 | 0.000384 | 0.002827 | 13    | 29    | 23    | 35     | 114    | 97     |
| Solyc04g051860.2.1 | -2.77876 | 7.267827 | 2.57E-09 | 7.99E-08 | 1437  | 4134  | 2589  | 11290  | 12942  | 6378   |

|                     |          |          |          |          |        |        |       |        |        |        |
|---------------------|----------|----------|----------|----------|--------|--------|-------|--------|--------|--------|
| Solyc02g088270.2.1  | -2.77871 | 2.857534 | 0.000123 | 0.001079 | 106    | 127    | 116   | 84     | 1223   | 304    |
| Solyc07g019460.2.1  | -2.77752 | 9.082191 | 2.39E-09 | 7.45E-08 | 7101   | 14203  | 6806  | 37563  | 47898  | 22800  |
| Solyc07g0066500.2.1 | -2.77473 | 7.024041 | 0.000152 | 0.001289 | 3540   | 1737   | 435   | 13016  | 7324   | 4629   |
| Solyc11g042460.1.1  | -2.77466 | 6.125996 | 5.10E-10 | 1.84E-08 | 1063   | 1559   | 871   | 3522   | 6743   | 3675   |
| Solyc06g050630.2.1  | -2.77415 | 4.227401 | 1.41E-07 | 2.90E-06 | 399    | 355    | 133   | 1449   | 1392   | 813    |
| Solyc10g007900.2.1  | -2.77317 | 5.485339 | 2.42E-05 | 0.000263 | 419    | 1278   | 708   | 443    | 6716   | 2451   |
| Solyc08g081610.2.1  | -2.77243 | 1.679    | 8.26E-06 | 0.000103 | 58     | 59     | 36    | 194    | 250    | 173    |
| Solyc05g052680.1.1  | -2.77207 | 6.690671 | 5.22E-09 | 1.53E-07 | 896    | 3458   | 1399  | 7379   | 8370   | 4595   |
| Solyc02g093860.2.1  | -2.77048 | 8.126022 | 4.59E-09 | 1.36E-07 | 3022   | 9081   | 3231  | 16470  | 25632  | 13532  |
| Solyc09g057960.1.1  | -2.77031 | 4.496903 | 6.37E-05 | 0.000616 | 646    | 226    | 87    | 1707   | 1486   | 1123   |
| Solyc08g082510.1.1  | -2.76992 | -0.10874 | 0.00131  | 0.007969 | 10     | 32     | 8     | 66     | 34     | 63     |
| Solyc05g014380.2.1  | -2.76787 | 8.655384 | 1.76E-07 | 3.54E-06 | 8081   | 7582   | 3601  | 29774  | 26718  | 20571  |
| Solyc02g069740.2.1  | -2.76758 | 2.568642 | 2.28E-07 | 4.48E-06 | 79     | 131    | 89    | 273    | 624    | 300    |
| Solyc06g062420.2.1  | -2.76293 | 3.774663 | 0.000106 | 0.000951 | 186    | 488    | 85    | 1845   | 494    | 254    |
| Solyc10g081430.1.1  | -2.76169 | 1.496352 | 1.00E-05 | 0.000122 | 39     | 72     | 34    | 217    | 234    | 106    |
| Solyc01g090210.2.1  | -2.75938 | 4.129294 | 9.73E-10 | 3.30E-08 | 228    | 497    | 204   | 1384   | 1521   | 604    |
| Solyc11g011120.1.1  | -2.75918 | 7.125291 | 1.12E-09 | 3.75E-08 | 1659   | 3110   | 2383  | 6991   | 12502  | 7927   |
| Solyc12g098760.1.1  | -2.75771 | 7.284369 | 6.29E-09 | 1.82E-07 | 1989   | 3369   | 2564  | 13042  | 9773   | 7006   |
| Solyc05g014390.2.1  | -2.75505 | 7.460991 | 2.08E-07 | 4.11E-06 | 3653   | 3037   | 1661  | 11706  | 11597  | 10064  |
| Solyc02g079180.1.1  | -2.74986 | 1.123412 | 0.000401 | 0.002929 | 45     | 55     | 9     | 171    | 116    | 116    |
| Solyc07g005150.1.1  | -2.74554 | 0.886509 | 0.000169 | 0.001407 | 25     | 34     | 32    | 52     | 187    | 122    |
| Solyc09g009130.2.1  | -2.74315 | 5.853315 | 8.36E-08 | 1.83E-06 | 1130   | 1033   | 626   | 2288   | 7068   | 2668   |
| Solyc03g120260.2.1  | -2.73682 | 7.433388 | 0.000253 | 0.001991 | 4799   | 2076   | 786   | 19697  | 8265   | 4944   |
| Solyc08g065480.2.1  | -2.73591 | 7.759221 | 2.28E-09 | 7.13E-08 | 3044   | 5491   | 2834  | 13308  | 20443  | 9630   |
| Solyc01g102400.2.1  | -2.73309 | 5.50929  | 5.25E-09 | 1.54E-07 | 865    | 752    | 577   | 2039   | 4665   | 2425   |
| Solyc02g094260.1.1  | -2.73239 | 6.138471 | 1.14E-09 | 3.81E-08 | 1007   | 1554   | 1054  | 4094   | 4624   | 4486   |
| Solyc10g055800.1.1  | -2.72988 | 11.414   | 7.27E-06 | 9.29E-05 | 66974  | 35349  | 22194 | 233434 | 181389 | 111510 |
| Solyc01g105300.2.1  | -2.72836 | 0.554454 | 0.000112 | 0.000999 | 22     | 32     | 20    | 79     | 123    | 80     |
| Solyc01g095620.2.1  | -2.72659 | 9.155641 | 8.51E-08 | 1.85E-06 | 10211  | 12903  | 5876  | 47111  | 39136  | 23938  |
| Solyc10g076660.1.1  | -2.72561 | 5.36391  | 3.84E-05 | 0.000397 | 1156   | 270    | 328   | 3165   | 3730   | 1394   |
| Solyc05g007220.2.1  | -2.72329 | 7.013986 | 8.98E-10 | 3.08E-08 | 1813   | 2957   | 1943  | 7378   | 12338  | 6096   |
| Solyc02g072210.1.1  | -2.72309 | 2.388167 | 9.32E-07 | 1.55E-05 | 49     | 176    | 71    | 300    | 450    | 272    |
| Solyc06g053670.1.1  | -2.72273 | 6.856702 | 1.27E-09 | 4.19E-08 | 1469   | 3226   | 1572  | 8108   | 8431   | 5773   |
| Solyc09g059400.2.1  | -2.72085 | -0.03977 | 0.001003 | 0.006356 | 5      | 37     | 14    | 60     | 56     | 61     |
| Solyc07g066330.2.1  | -2.71928 | 5.27119  | 2.18E-06 | 3.26E-05 | 349    | 1823   | 223   | 1533   | 4052   | 2153   |
| Solyc12g014510.1.1  | -2.71927 | 1.251382 | 2.40E-05 | 0.000262 | 24     | 67     | 38    | 106    | 233    | 130    |
| Solyc12g010710.1.1  | -2.71838 | 5.69262  | 4.75E-10 | 1.73E-08 | 659    | 1533   | 643   | 4013   | 4039   | 2090   |
| Solyc02g082550.2.1  | -2.71731 | 5.475378 | 5.36E-11 | 2.40E-09 | 600    | 1197   | 591   | 3176   | 3755   | 1859   |
| Solyc01g109710.2.1  | -2.71649 | 8.452489 | 1.33E-08 | 3.60E-07 | 5864   | 6496   | 5125  | 25496  | 25497  | 16612  |
| Solyc03g117870.2.1  | -2.71424 | 8.948483 | 3.14E-09 | 9.60E-08 | 6315   | 12721  | 7416  | 34470  | 41644  | 21338  |
| Solyc12g036390.1.1  | -2.71259 | 4.85545  | 1.47E-09 | 4.79E-08 | 212    | 1020   | 454   | 1909   | 2310   | 1413   |
| Solyc08g078040.2.1  | -2.7103  | 7.831274 | 2.72E-08 | 6.74E-07 | 2108   | 7495   | 3400  | 10506  | 24409  | 11193  |
| Solyc04g011350.2.1  | -2.7075  | 7.354249 | 7.53E-09 | 2.16E-07 | 2324   | 4214   | 2198  | 12393  | 10288  | 8281   |
| Solyc08g007130.2.1  | -2.70426 | 4.754504 | 0.000474 | 0.003374 | 843    | 281    | 59    | 1359   | 3204   | 1048   |
| Solyc11g065990.1.1  | -2.70348 | 2.966063 | 5.66E-08 | 1.29E-06 | 92     | 215    | 119   | 466    | 801    | 315    |
| Solyc01g073840.1.1  | -2.70264 | 1.0019   | 0.001351 | 0.008194 | 28     | 86     | 4     | 138    | 122    | 112    |
| Solyc04g016230.2.1  | -2.70083 | 5.442626 | 9.68E-06 | 0.000119 | 1116   | 679    | 256   | 2245   | 2304   | 3298   |
| Solyc04g082810.2.1  | -2.70065 | 1.973437 | 4.51E-05 | 0.000457 | 22     | 156    | 58    | 345    | 235    | 164    |
| Solyc09g064530.2.1  | -2.69983 | 5.210537 | 4.15E-09 | 1.24E-07 | 733    | 715    | 401   | 2676   | 3128   | 1509   |
| RRNA_9_2            | -2.6946  | 5.281812 | 1.76E-08 | 4.59E-07 | 764    | 749    | 436   | 1461   | 3891   | 2333   |
| Solyc12g007030.1.1  | -2.69353 | 8.868246 | 1.97E-07 | 3.93E-06 | 9787   | 8931   | 4539  | 29720  | 41078  | 21424  |
| Solyc07g049190.2.1  | -2.69304 | 5.06851  | 2.92E-11 | 1.38E-09 | 508    | 875    | 418   | 2197   | 2932   | 1494   |
| Solyc06g062490.2.1  | -2.69266 | 2.218109 | 3.17E-06 | 4.49E-05 | 77     | 78     | 77    | 218    | 425    | 264    |
| Solyc03g025720.2.1  | -2.69245 | 9.848103 | 0.000895 | 0.005779 | 29645  | 7852   | 2373  | 79440  | 65371  | 34336  |
| Solyc03g007710.2.1  | -2.68614 | 0.821305 | 0.00032  | 0.002433 | 17     | 52     | 29    | 42     | 183    | 119    |
| Solyc01g060020.2.1  | -2.68479 | 12.54448 | 2.19E-06 | 3.26E-05 | 136760 | 107505 | 49335 | 448207 | 360289 | 312904 |
| Solyc01g103670.2.1  | -2.67971 | 6.755902 | 1.67E-09 | 5.38E-08 | 1446   | 2824   | 1622  | 6822   | 7599   | 6073   |
| Solyc08g079000.2.1  | -2.67598 | 1.72345  | 0.000129 | 0.001121 | 84     | 49     | 24    | 186    | 298    | 162    |
| Solyc03g032090.1.1  | -2.67553 | 5.795799 | 4.12E-08 | 9.71E-07 | 415    | 1433   | 1258  | 2478   | 6146   | 2659   |
| Solyc01g087990.2.1  | -2.67523 | 1.883144 | 2.04E-05 | 0.000228 | 27     | 139    | 54    | 166    | 417    | 167    |
| Solyc12g099790.1.1  | -2.67442 | 3.051145 | 0.000558 | 0.003866 | 163    | 120    | 122   | 1172   | 180    | 167    |
| Solyc02g093230.2.1  | -2.6721  | 5.497458 | 2.83E-07 | 5.40E-06 | 874    | 1142   | 378   | 4257   | 3123   | 1418   |
| Solyc07g063640.1.1  | -2.66882 | 0.98815  | 0.000202 | 0.001642 | 30     | 36     | 35    | 74     | 275    | 70     |
| Solyc03g114180.2.1  | -2.66655 | 5.116848 | 0.000546 | 0.003796 | 849    | 823    | 110   | 4547   | 1116   | 788    |
| Solyc09g008020.2.1  | -2.66584 | 6.254987 | 1.94E-08 | 4.99E-07 | 1321   | 1726   | 978   | 6464   | 5224   | 3022   |
| Solyc11g073110.1.1  | -2.66508 | 3.508906 | 1.38E-07 | 2.86E-06 | 73     | 383    | 217   | 697    | 1050   | 508    |
| Solyc11g042420.1.1  | -2.66484 | 0.584755 | 0.000161 | 0.001351 | 16     | 34     | 30    | 92     | 146    | 59     |
| Solyc02g092110.2.1  | -2.66469 | 5.137988 | 1.07E-09 | 3.59E-08 | 552    | 1095   | 331   | 2061   | 2939   | 1833   |
| Solyc03g113710.2.1  | -2.66331 | 3.992175 | 2.49E-08 | 6.24E-07 | 310    | 387    | 144   | 851    | 1512   | 785    |
| Solyc01g009160.2.1  | -2.66224 | 4.98048  | 9.46E-09 | 2.63E-07 | 563    | 900    | 267   | 2377   | 2467   | 1308   |
| Solyc01g073970.2.1  | -2.66133 | 4.403844 | 5.37E-08 | 1.23E-06 | 313    | 241    | 491   | 1234   | 2064   | 931    |
| Solyc01g104770.2.1  | -2.66132 | 7.703227 | 7.81E-09 | 2.23E-07 | 2132   | 6511   | 3375  | 12951  | 18138  | 9811   |
| Solyc01g107170.2.1  | -2.66069 | 7.177619 | 1.32E-07 | 2.73E-06 | 1968   | 5316   | 1238  | 7518   | 13494  | 7500   |
| Solyc12g094390.1.1  | -2.66007 | 3.93369  | 3.36E-09 | 1.02E-07 | 199    | 439    | 218   | 1250   | 984    | 672    |
| Solyc10g050220.1.1  | -2.65953 | 2.758686 | 8.81E-05 | 0.00081  | 187    | 78     | 49    | 548    | 482    | 273    |
| Solyc02g061770.2.1  | -2.65793 | 6.917669 | 0.000673 | 0.004545 | 3941   | 1026   | 370   | 9944   | 8950   | 4614   |
| Solyc09g009260.2.1  | -2.65609 | 8.029469 | 1.70E-08 | 4.44E-07 | 2347   | 7557   | 5062  | 17405  | 21857  | 11842  |
| Solyc11g008250.1.1  | -2.65246 | 8.60742  | 6.88E-08 | 1.54E-06 | 6876   | 9411   | 4609  | 30964  | 31134  | 14464  |
| Solyc11g011380.1.1  | -2.65124 | 8.387823 | 6.00E-07 | 1.05E-05 | 2286   | 11314  | 6398  | 13438  | 39417  | 15795  |
| Solyc03g034100.2.1  | -2.64733 | 1.634154 | 0.00069  | 0.004637 | 71     | 38     | 40    | 349    | 93     | 118    |
| Solyc06g083710.1.1  | -2.64527 | 1.834547 | 3.04E-05 | 0.000324 | 26     | 129    | 59    | 298    | 209    | 161    |
| Solyc04g005040.1.1  | -2.63927 | 4.829207 | 7.97E-08 | 1.74E-06 | 471    | 976    | 198   | 2126   | 2208   | 1188   |
| Solyc06g053260.1.1  | -2.63789 | 7.965298 | 9.59E-06 | 0.000118 | 5970   | 5200   | 1650  | 21353  | 20711  | 7544   |
| Solyc05g010140.2.1  | -2.63725 | 5.81267  | 7.69E-07 | 1.31E-05 | 1344   | 877    | 557   | 4392   | 4155   | 2318   |

|                    |          |          |          |          |       |       |       |        |       |       |
|--------------------|----------|----------|----------|----------|-------|-------|-------|--------|-------|-------|
| Solyc10g086410.2.1 | -2.63495 | 7.764861 | 2.56E-07 | 4.96E-06 | 3553  | 5725  | 2727  | 20498  | 13829 | 7423  |
| Solyc12g011090.1.1 | -2.62938 | 0.875741 | 0.000162 | 0.001358 | 28    | 55    | 20    | 77     | 149   | 119   |
| Solyc02g079570.2.1 | -2.62845 | 7.571229 | 6.66E-08 | 1.50E-06 | 3422  | 5143  | 1943  | 11968  | 17826 | 8006  |
| Solyc09g075670.1.1 | -2.61524 | 4.249406 | 8.55E-08 | 1.86E-06 | 360   | 561   | 149   | 1300   | 1351  | 960   |
| Solyc04g009600.2.1 | -2.61416 | 3.943255 | 6.17E-10 | 2.19E-08 | 193   | 416   | 266   | 1036   | 1202  | 725   |
| Solyc09g009690.2.1 | -2.61333 | 7.330952 | 5.56E-05 | 0.000547 | 4676  | 1820  | 1126  | 13099  | 10858 | 6774  |
| Solyc01g081540.2.1 | -2.60969 | 6.578238 | 6.84E-09 | 1.97E-07 | 1475  | 2314  | 1504  | 7345   | 7211  | 3920  |
| Solyc02g065550.2.1 | -2.60838 | 6.229823 | 3.95E-07 | 7.27E-06 | 1591  | 1898  | 597   | 5088   | 6814  | 2966  |
| Solyc05g009420.1.1 | -2.60621 | 5.739366 | 7.50E-10 | 2.62E-08 | 653   | 1357  | 1018  | 3620   | 4560  | 2278  |
| Solyc07g008360.1.1 | -2.60466 | 0.102374 | 0.000876 | 0.005674 | 9     | 27    | 24    | 64     | 119   | 33    |
| Solyc10g084400.1.1 | -2.60215 | 8.755439 | 0.000172 | 0.001431 | 12293 | 5061  | 3375  | 46782  | 19768 | 14079 |
| Solyc12g010480.1.1 | -2.60101 | 2.011441 | 1.73E-05 | 0.000198 | 75    | 68    | 67    | 293    | 233   | 217   |
| Solyc09g014860.2.1 | -2.60031 | 7.627658 | 4.42E-08 | 1.04E-06 | 3606  | 5097  | 2288  | 12161  | 18060 | 8753  |
| Solyc09g018230.1.1 | -2.59758 | 5.318948 | 2.81E-09 | 8.67E-08 | 781   | 875   | 497   | 2904   | 3087  | 1719  |
| Solyc09g010940.2.1 | -2.59741 | 7.499556 | 4.20E-08 | 9.89E-07 | 2728  | 5464  | 2308  | 14070  | 13776 | 7196  |
| Solyc09g089580.2.1 | -2.59604 | 5.444634 | 5.89E-05 | 0.000576 | 309   | 1676  | 756   | 974    | 7902  | 1039  |
| Solyc02g032930.2.1 | -2.5939  | 6.92492  | 1.78E-08 | 4.64E-07 | 2173  | 2596  | 1823  | 8508   | 10054 | 5124  |
| Solyc11g005420.1.1 | -2.59085 | 3.125123 | 2.58E-07 | 5.00E-06 | 124   | 232   | 141   | 340    | 869   | 500   |
| Solyc02g087580.2.1 | -2.58972 | 3.943948 | 1.06E-07 | 2.26E-06 | 313   | 386   | 149   | 1179   | 1129  | 646   |
| Solyc02g078480.2.1 | -2.58937 | 5.292707 | 1.14E-07 | 2.40E-06 | 893   | 799   | 380   | 3019   | 2969  | 1583  |
| Solyc10g078470.1.1 | -2.58914 | 4.294    | 2.28E-07 | 4.48E-06 | 117   | 749   | 374   | 934    | 1649  | 1167  |
| Solyc02g085300.2.1 | -2.5883  | 4.165376 | 4.45E-07 | 8.08E-06 | 413   | 366   | 169   | 1446   | 1418  | 636   |
| Solyc01g066760.2.1 | -2.58457 | 3.7959   | 9.62E-09 | 2.67E-07 | 210   | 286   | 266   | 970    | 885   | 736   |
| Solyc03g044190.2.1 | -2.58299 | 6.796815 | 1.62E-08 | 4.28E-07 | 1743  | 2684  | 1812  | 8307   | 6893  | 5580  |
| Solyc11g062400.1.1 | -2.58274 | 6.077843 | 7.78E-09 | 2.22E-07 | 1151  | 1941  | 789   | 4309   | 5606  | 3169  |
| Solyc09g065940.2.1 | -2.5824  | 1.9026   | 1.39E-05 | 0.000163 | 72    | 71    | 56    | 204    | 309   | 201   |
| Solyc09g061620.2.1 | -2.58021 | 6.628024 | 5.62E-09 | 1.64E-07 | 1250  | 2790  | 1736  | 4877   | 9761  | 4907  |
| Solyc01g109310.2.1 | -2.57983 | 1.813295 | 9.15E-06 | 0.000113 | 49    | 103   | 52    | 174    | 339   | 175   |
| Solyc05g041540.2.1 | -2.57857 | 7.346246 | 1.18E-08 | 3.21E-07 | 2677  | 3914  | 2527  | 9070   | 14956 | 7856  |
| Solyc04g051310.2.1 | -2.57631 | 7.463031 | 1.06E-08 | 2.92E-07 | 2405  | 5043  | 2860  | 11488  | 15880 | 7362  |
| Solyc11g072470.1.1 | -2.57402 | 5.335413 | 4.82E-08 | 1.12E-06 | 918   | 838   | 403   | 2319   | 3493  | 2014  |
| Solyc08g061480.2.1 | -2.57219 | 6.802963 | 2.05E-07 | 4.05E-06 | 843   | 3354  | 2561  | 5808   | 11782 | 4840  |
| Solyc04g077620.1.1 | -2.57004 | 7.507025 | 4.79E-08 | 1.11E-06 | 3169  | 5210  | 2122  | 11824  | 14852 | 8468  |
| Solyc02g082910.2.1 | -2.56908 | 6.576065 | 9.89E-07 | 1.63E-05 | 2271  | 1325  | 1258  | 5002   | 8345  | 5094  |
| Solyc08g079230.1.1 | -2.56679 | 1.602315 | 0.000177 | 0.001465 | 43    | 91    | 44    | 220    | 92    | 211   |
| Solyc10g018120.1.1 | -2.56594 | 5.748409 | 1.58E-05 | 0.000182 | 316   | 2563  | 749   | 1466   | 6739  | 2790  |
| Solyc06g069570.2.1 | -2.56112 | 7.584858 | 4.96E-08 | 1.15E-06 | 3605  | 4666  | 2500  | 12774  | 15650 | 8687  |
| Solyc01g109460.2.1 | -2.55953 | 8.723244 | 3.96E-08 | 9.37E-07 | 4979  | 14620 | 6421  | 23336  | 33181 | 23747 |
| Solyc02g092240.2.1 | -2.55861 | 5.050432 | 1.30E-05 | 0.000153 | 859   | 497   | 337   | 3452   | 2002  | 884   |
| Solyc02g032950.2.1 | -2.55363 | 7.342191 | 3.29E-06 | 4.63E-05 | 3795  | 3956  | 1215  | 12124  | 12277 | 6792  |
| Solyc01g109720.2.1 | -2.5533  | 5.454875 | 2.40E-05 | 0.000262 | 1277  | 499   | 381   | 3772   | 2952  | 1642  |
| Solyc08g080670.1.1 | -2.54978 | 10.52075 | 0.001142 | 0.007106 | 48961 | 16652 | 5278  | 147347 | 67919 | 55844 |
| Solyc06g024210.1.1 | -2.54836 | 4.895977 | 3.68E-08 | 8.78E-07 | 506   | 499   | 608   | 1161   | 2459  | 1988  |
| Solyc02g088090.1.1 | -2.54814 | 7.750172 | 1.54E-07 | 3.12E-06 | 2516  | 8548  | 2670  | 11930  | 20996 | 9659  |
| Solyc02g087740.2.1 | -2.54804 | 3.938117 | 8.32E-09 | 2.35E-07 | 274   | 418   | 193   | 980    | 1358  | 657   |
| Solyc04g011770.2.1 | -2.54578 | 4.077485 | 5.22E-08 | 1.20E-06 | 364   | 342   | 213   | 1205   | 1221  | 780   |
| Solyc11g017390.1.1 | -2.54416 | 0.841498 | 0.000248 | 0.001959 | 24    | 40    | 37    | 87     | 213   | 64    |
| Solyc10g084000.1.1 | -2.54307 | 1.293825 | 0.000831 | 0.005425 | 19    | 135   | 16    | 120    | 274   | 99    |
| Solyc01g091190.2.1 | -2.53994 | 9.644137 | 5.71E-08 | 1.30E-06 | 8599  | 23107 | 16580 | 54177  | 66063 | 34719 |
| Solyc10g017580.2.1 | -2.53944 | 6.232533 | 4.00E-09 | 1.20E-07 | 938   | 2362  | 1275  | 4670   | 6710  | 3312  |
| Solyc03g093130.2.1 | -2.53886 | 2.961599 | 0.000802 | 0.005276 | 103   | 387   | 32    | 259    | 1298  | 173   |
| Solyc04g064870.2.1 | -2.53635 | 7.567166 | 7.98E-05 | 0.000746 | 5684  | 2993  | 1012  | 10435  | 18330 | 8629  |
| Solyc07g054140.2.1 | -2.53601 | 2.308628 | 3.76E-06 | 5.22E-05 | 71    | 104   | 105   | 291    | 427   | 237   |
| Solyc08g076160.2.1 | -2.53366 | 7.589882 | 1.41E-08 | 3.79E-07 | 2780  | 5571  | 3144  | 12022  | 16984 | 8548  |
| Solyc04g054820.2.1 | -2.53251 | 5.063179 | 5.05E-08 | 1.17E-06 | 687   | 786   | 408   | 2853   | 1942  | 1437  |
| Solyc06g048810.2.1 | -2.53094 | 5.962682 | 1.58E-09 | 5.09E-08 | 883   | 1750  | 1077  | 3644   | 5441  | 2997  |
| Solyc12g010980.1.1 | -2.52942 | 7.291271 | 1.79E-07 | 3.60E-06 | 1837  | 3597  | 3695  | 12339  | 9359  | 7424  |
| Solyc03g113040.2.1 | -2.52677 | 4.283437 | 2.58E-07 | 5.00E-06 | 406   | 515   | 197   | 1559   | 1645  | 620   |
| Solyc04g080740.1.1 | -2.52116 | 6.250708 | 3.09E-08 | 7.54E-07 | 762   | 2085  | 1763  | 5341   | 5820  | 3399  |
| Solyc10g012170.2.1 | -2.52074 | 5.212967 | 1.50E-09 | 4.87E-08 | 466   | 1308  | 554   | 1840   | 3777  | 1729  |
| Solyc12g017530.1.1 | -2.52073 | 5.856802 | 6.57E-09 | 1.90E-07 | 716   | 1862  | 998   | 4311   | 4418  | 2392  |
| Solyc04g079350.1.1 | -2.51988 | 6.527868 | 2.74E-08 | 6.77E-07 | 1429  | 2891  | 1282  | 4152   | 8531  | 5152  |
| Solyc01g005520.2.1 | -2.51867 | 4.376991 | 1.24E-09 | 4.08E-08 | 239   | 564   | 446   | 1127   | 1755  | 1097  |
| Solyc02g070020.1.1 | -2.51339 | 6.609219 | 5.13E-07 | 9.20E-06 | 2181  | 2256  | 1059  | 7408   | 6963  | 4179  |
| Solyc02g078900.2.1 | -2.51326 | 6.858903 | 2.04E-08 | 5.25E-07 | 1441  | 3536  | 2143  | 5460   | 10306 | 6523  |
| Solyc03g031830.1.1 | -2.51276 | 4.75432  | 2.14E-09 | 6.76E-08 | 519   | 705   | 345   | 1653   | 2276  | 1271  |
| Solyc10g055560.1.1 | -2.51057 | 1.540558 | 7.60E-05 | 0.000714 | 52    | 50    | 58    | 226    | 224   | 107   |
| Solyc01g104880.2.1 | -2.50813 | 6.65349  | 1.53E-08 | 4.06E-07 | 1532  | 2993  | 1572  | 7205   | 7372  | 4544  |
| Solyc01g095970.2.1 | -2.50745 | 6.44653  | 1.65E-08 | 4.33E-07 | 1504  | 2235  | 1373  | 5759   | 8032  | 3377  |
| Solyc06g069670.2.1 | -2.50332 | 1.991981 | 0.000178 | 0.001472 | 24    | 140   | 92    | 120    | 360   | 271   |
| Solyc03g082370.1.1 | -2.50257 | 7.071237 | 1.57E-06 | 2.44E-05 | 2485  | 4880  | 1019  | 9005   | 10452 | 6215  |
| Solyc01g097040.2.1 | -2.49733 | 6.764512 | 1.55E-08 | 4.12E-07 | 1448  | 3433  | 1863  | 7259   | 9382  | 4494  |
| Solyc08g082280.2.1 | -2.49647 | 8.982893 | 3.96E-08 | 9.37E-07 | 7521  | 15326 | 8135  | 34071  | 40750 | 22366 |
| Solyc04g056340.2.1 | -2.49027 | 6.329256 | 1.18E-06 | 1.91E-05 | 1825  | 1871  | 887   | 6824   | 4989  | 3256  |
| Solyc03g112080.1.1 | -2.4871  | 4.235683 | 2.58E-09 | 7.99E-08 | 290   | 514   | 331   | 1240   | 1747  | 717   |
| Solyc01g079600.2.1 | -2.48217 | 8.492683 | 1.90E-05 | 0.000214 | 10023 | 5435  | 3654  | 28336  | 26797 | 13801 |
| Solyc01g088400.2.1 | -2.47983 | 5.075985 | 6.14E-06 | 8.02E-05 | 469   | 852   | 707   | 634    | 4978  | 1504  |
| Solyc04g016160.2.1 | -2.47965 | 4.097921 | 3.70E-08 | 8.81E-07 | 361   | 440   | 202   | 991    | 1419  | 858   |
| Solyc06g082440.1.1 | -2.47799 | 5.50186  | 1.05E-05 | 0.000127 | 1213  | 1079  | 273   | 3432   | 3371  | 1838  |
| Solyc08g005120.2.1 | -2.47784 | 4.648954 | 1.17E-07 | 2.46E-06 | 505   | 645   | 327   | 2048   | 2154  | 729   |
| Solyc08g077020.1.1 | -2.47721 | 3.805798 | 1.67E-06 | 2.58E-05 | 175   | 655   | 124   | 966    | 1248  | 521   |
| Solyc02g084970.2.1 | -2.47679 | 3.383774 | 6.47E-07 | 1.13E-05 | 194   | 330   | 116   | 461    | 1034  | 540   |
| Solyc08g067630.2.1 | -2.47558 | 8.305255 | 1.06E-06 | 1.73E-05 | 2448  | 11660 | 6766  | 15712  | 33653 | 13704 |
| RRNA_6_4           | -2.47248 | 3.557984 | 1.76E-07 | 3.53E-06 | 213   | 265   | 209   | 497    | 999   | 725   |

|                    |          |          |          |          |       |       |       |        |        |        |
|--------------------|----------|----------|----------|----------|-------|-------|-------|--------|--------|--------|
| Solyc06g076080.1.1 | -2.47196 | 3.43915  | 8.10E-06 | 0.000102 | 127   | 538   | 89    | 517    | 1109   | 510    |
| Solyc03g083130.1.1 | -2.46686 | 4.685006 | 1.83E-09 | 5.85E-08 | 373   | 832   | 414   | 1902   | 2027   | 1010   |
| Solyc12g042210.1.1 | -2.46493 | 0.849386 | 0.001063 | 0.006663 | 23    | 45    | 40    | 194    | 92     | 47     |
| Solyc04g077230.1.1 | -2.46084 | 5.840419 | 3.33E-08 | 8.04E-07 | 896   | 2032  | 741   | 3814   | 3856   | 2974   |
| Solyc08g014150.2.1 | -2.4595  | 7.198511 | 6.70E-08 | 1.51E-06 | 2754  | 3865  | 2199  | 9742   | 11837  | 6524   |
| Solyc01g009810.2.1 | -2.45828 | 3.812329 | 0.000213 | 0.001715 | 310   | 523   | 54    | 361    | 1615   | 806    |
| Solyc07g056390.2.1 | -2.45821 | 6.456372 | 1.91E-08 | 4.93E-07 | 1437  | 2269  | 1604  | 6215   | 6382   | 3981   |
| Solyc08g078850.2.1 | -2.45299 | 4.140393 | 5.30E-07 | 9.47E-06 | 329   | 470   | 265   | 1059   | 748    | 1259   |
| Solyc09g089780.2.1 | -2.45284 | 2.081903 | 0.000492 | 0.003477 | 15    | 214   | 76    | 191    | 333    | 263    |
| Solyc04g079820.2.1 | -2.45214 | 3.557442 | 0.000759 | 0.005034 | 420   | 90    | 72    | 770    | 1059   | 463    |
| Solyc02g078170.1.1 | -2.45034 | 5.65839  | 4.50E-08 | 1.05E-06 | 1044  | 1408  | 600   | 3470   | 4039   | 2154   |
| NCRNA_11_155       | -2.44904 | 1.474841 | 0.000204 | 0.00166  | 57    | 69    | 38    | 89     | 261    | 176    |
| Solyc08g014170.1.1 | -2.44815 | 2.387169 | 5.01E-06 | 6.73E-05 | 77    | 170   | 84    | 365    | 390    | 232    |
| Solyc11g056620.1.1 | -2.44682 | 6.099673 | 1.43E-08 | 3.84E-07 | 1224  | 1864  | 1093  | 3860   | 6407   | 3082   |
| Solyc10g062160.1.1 | -2.44663 | 4.826156 | 1.19E-08 | 3.24E-07 | 305   | 1100  | 490   | 1367   | 2974   | 1273   |
| Solyc01g112070.2.1 | -2.4455  | 3.144635 | 0.001286 | 0.007851 | 48    | 321   | 224   | 80     | 1207   | 514    |
| Solyc07g005530.2.1 | -2.4428  | 6.56386  | 1.18E-07 | 2.47E-06 | 1672  | 2355  | 1679  | 7626   | 6905   | 3492   |
| Solyc08g081230.1.1 | -2.4419  | 7.010715 | 9.06E-07 | 1.51E-05 | 2108  | 5264  | 1196  | 7804   | 11005  | 5948   |
| Solyc01g086650.2.1 | -2.44153 | 5.510934 | 4.81E-08 | 1.12E-06 | 1021  | 893   | 699   | 2656   | 3538   | 2389   |
| Solyc10g006710.2.1 | -2.43722 | 5.855093 | 3.94E-07 | 7.26E-06 | 1366  | 1097  | 832   | 3940   | 4019   | 2840   |
| Solyc02g089900.1.1 | -2.43721 | 6.300372 | 2.32E-06 | 3.42E-05 | 821   | 3903  | 884   | 3705   | 8193   | 3647   |
| Solyc04g050440.2.1 | -2.43579 | 1.441318 | 0.001219 | 0.007499 | 73    | 52    | 27    | 280    | 112    | 97     |
| Solyc03g026360.1.1 | -2.43486 | 0.482496 | 0.001259 | 0.007705 | 34    | 25    | 19    | 88     | 82     | 80     |
| Solyc12g036330.1.1 | -2.43346 | 4.132401 | 2.05E-06 | 3.08E-05 | 467   | 308   | 204   | 824    | 1589   | 943    |
| Solyc03g119480.2.1 | -2.43324 | 5.585041 | 1.11E-08 | 3.05E-07 | 856   | 1552  | 629   | 3204   | 3438   | 2343   |
| Solyc02g082250.2.1 | -2.43043 | 7.698726 | 7.11E-08 | 1.58E-06 | 3018  | 6379  | 3813  | 14250  | 17452  | 8342   |
| Solyc09g089850.2.1 | -2.42943 | 4.013763 | 8.04E-09 | 2.29E-07 | 242   | 442   | 321   | 783    | 1588   | 776    |
| Solyc03g111720.2.1 | -2.42916 | 8.1046   | 6.31E-07 | 1.10E-05 | 6108  | 5509  | 4323  | 17002  | 25905  | 10967  |
| RRNA_6_3           | -2.42891 | 5.312051 | 1.66E-07 | 3.34E-06 | 840   | 749   | 705   | 1495   | 3449   | 2528   |
| Solyc07g056410.2.1 | -2.42782 | 3.89843  | 2.75E-06 | 3.97E-05 | 378   | 288   | 183   | 869    | 1642   | 494    |
| Solyc02g086880.2.1 | -2.42368 | 11.80687 | 2.03E-06 | 3.05E-05 | 82216 | 72231 | 53223 | 267758 | 229550 | 166902 |
| Solyc05g006660.2.1 | -2.4218  | 7.056149 | 3.60E-08 | 8.62E-07 | 2270  | 3713  | 2300  | 7908   | 11526  | 6117   |
| Solyc09g008190.2.1 | -2.41957 | 3.84634  | 1.54E-08 | 4.08E-07 | 205   | 397   | 301   | 734    | 1313   | 717    |
| Solyc04g048950.2.1 | -2.41926 | 6.194291 | 1.83E-06 | 2.81E-05 | 1845  | 1511  | 872   | 5454   | 4871   | 3314   |
| Solyc12g006270.1.1 | -2.41837 | 1.107441 | 0.000261 | 0.002046 | 37    | 49    | 43    | 177    | 131    | 88     |
| Solyc04g008450.2.1 | -2.4139  | 3.963203 | 6.42E-08 | 1.45E-06 | 322   | 386   | 235   | 1017   | 1039   | 819    |
| Solyc03g118720.2.1 | -2.4135  | 6.127174 | 1.45E-08 | 3.87E-07 | 1215  | 1990  | 1173  | 4279   | 5834   | 3227   |
| Solyc11g030730.1.1 | -2.41319 | 3.624058 | 2.85E-05 | 0.000306 | 121   | 696   | 100   | 555    | 1303   | 571    |
| Solyc03g082500.2.1 | -2.41307 | 6.382658 | 3.64E-08 | 8.69E-07 | 1500  | 2481  | 1273  | 5178   | 7499   | 3486   |
| Solyc03g005470.2.1 | -2.41235 | 8.504594 | 6.76E-06 | 8.71E-05 | 9715  | 6392  | 4411  | 24750  | 27892  | 16127  |
| Solyc07g008140.2.1 | -2.41188 | 4.741576 | 0.000301 | 0.002305 | 80    | 1669  | 347   | 1167   | 3211   | 1050   |
| Solyc05g056140.2.1 | -2.41006 | 6.199797 | 1.93E-07 | 3.85E-06 | 1600  | 2003  | 900   | 4206   | 6021   | 3695   |
| Solyc12g019890.1.1 | -2.40918 | 5.494081 | 6.51E-07 | 1.13E-05 | 1166  | 800   | 597   | 2831   | 3859   | 1961   |
| Solyc09g074250.2.1 | -2.40614 | 5.454122 | 3.66E-09 | 1.10E-07 | 625   | 1363  | 842   | 2026   | 4261   | 2205   |
| Solyc01g014840.2.1 | -2.39894 | 4.982362 | 1.48E-06 | 2.33E-05 | 195   | 1444  | 636   | 1515   | 2658   | 1782   |
| Solyc03g119440.2.1 | -2.3956  | 7.827739 | 1.46E-07 | 2.99E-06 | 2798  | 7904  | 4462  | 14402  | 19514  | 9711   |
| Solyc01g096420.2.1 | -2.39461 | 7.553226 | 0.00047  | 0.003349 | 6103  | 3867  | 696   | 9848   | 14376  | 10716  |
| Solyc03g044300.2.1 | -2.38922 | 3.477048 | 1.86E-06 | 2.86E-05 | 211   | 283   | 195   | 1010   | 702    | 371    |
| Solyc06g065910.2.1 | -2.38919 | 1.05614  | 0.000252 | 0.001984 | 34    | 48    | 45    | 149    | 170    | 76     |
| Solyc02g072190.2.1 | -2.38815 | 4.530066 | 5.31E-08 | 1.22E-06 | 218   | 914   | 469   | 1157   | 2012   | 1217   |
| Solyc09g011490.2.1 | -2.38363 | 4.75866  | 6.71E-08 | 1.51E-06 | 452   | 1101  | 292   | 1542   | 2377   | 1261   |
| Solyc01g087560.2.1 | -2.38353 | 8.629028 | 7.79E-06 | 9.84E-05 | 10765 | 7636  | 4545  | 24513  | 33503  | 17615  |
| Solyc07g043550.2.1 | -2.38344 | 5.53742  | 1.00E-05 | 0.000122 | 332   | 2087  | 926   | 1295   | 4539   | 2999   |
| Solyc01g067640.2.1 | -2.38334 | 5.888986 | 1.72E-08 | 4.49E-07 | 1027  | 1600  | 1113  | 3987   | 4397   | 2732   |
| Solyc03g033680.1.1 | -2.38051 | 0.128546 | 0.001179 | 0.007298 | 16    | 35    | 19    | 49     | 95     | 59     |
| Solyc03g053090.1.1 | -2.38041 | 1.841525 | 7.79E-05 | 0.00073  | 78    | 78    | 59    | 233    | 340    | 125    |
| Solyc08g067410.1.1 | -2.37836 | 6.914821 | 1.22E-07 | 2.55E-06 | 2319  | 3346  | 1949  | 7920   | 10450  | 4852   |
| Solyc01g066720.2.1 | -2.37739 | 7.385119 | 1.17E-07 | 2.46E-06 | 3025  | 5109  | 2637  | 10480  | 13275  | 7817   |
| Solyc06g076820.1.1 | -2.37713 | 4.773397 | 2.53E-09 | 7.86E-08 | 497   | 806   | 447   | 1573   | 2086   | 1441   |
| Solyc11g012790.1.1 | -2.37655 | 6.117287 | 2.15E-08 | 5.49E-07 | 1151  | 2063  | 1264  | 4481   | 5837   | 2951   |
| Solyc01g086850.2.1 | -2.37627 | 5.084209 | 5.66E-09 | 1.65E-07 | 649   | 960   | 541   | 2446   | 2464   | 1456   |
| Solyc07g007170.2.1 | -2.37611 | 6.019765 | 1.07E-07 | 2.27E-06 | 1166  | 2288  | 841   | 4223   | 5594   | 2649   |
| Solyc01g005470.2.1 | -2.37526 | 9.601392 | 1.94E-06 | 2.95E-05 | 16338 | 19787 | 12004 | 64673  | 46115  | 32309  |
| Solyc12g005980.1.1 | -2.37264 | 7.395449 | 9.52E-07 | 1.58E-05 | 3832  | 4412  | 2177  | 11525  | 13067  | 7246   |
| Solyc01g067070.2.1 | -2.37218 | 6.753038 | 5.44E-08 | 1.25E-06 | 1907  | 3200  | 1837  | 6793   | 8487   | 5054   |
| Solyc09g091990.2.1 | -2.37088 | 5.51834  | 2.68E-09 | 8.28E-08 | 683   | 1434  | 892   | 2717   | 3952   | 2083   |
| Solyc01g008130.2.1 | -2.36977 | 4.69168  | 7.34E-08 | 1.62E-06 | 310   | 1057  | 437   | 1033   | 2659   | 1330   |
| Solyc03g096390.2.1 | -2.36823 | 7.443853 | 1.45E-07 | 2.96E-06 | 2823  | 5912  | 2830  | 9427   | 16442  | 7816   |
| Solyc04g071580.2.1 | -2.36627 | 2.76168  | 8.22E-06 | 0.000103 | 119   | 185   | 127   | 254    | 766    | 320    |
| Solyc01g081310.2.1 | -2.36579 | 5.87935  | 4.81E-06 | 6.49E-05 | 695   | 2436  | 1003  | 1514   | 6734   | 3321   |
| Solyc02g078840.2.1 | -2.36392 | 6.320509 | 3.34E-08 | 8.05E-07 | 1295  | 2569  | 1403  | 4320   | 7316   | 3720   |
| Solyc03g044380.2.1 | -2.36367 | 6.339136 | 6.68E-08 | 1.50E-06 | 1470  | 2204  | 1480  | 5753   | 5960   | 3486   |
| Solyc09g091660.2.1 | -2.35942 | 10.85698 | 1.43E-06 | 2.27E-05 | 27306 | 78997 | 23948 | 126112 | 153331 | 74729  |
| Solyc08g079010.1.1 | -2.35718 | 1.84308  | 0.00024  | 0.001903 | 97    | 79    | 38    | 238    | 306    | 140    |
| Solyc12g098910.1.1 | -2.35645 | 6.451559 | 0.000164 | 0.001378 | 2930  | 1437  | 562   | 6003   | 6428   | 3943   |
| Solyc03g112090.2.1 | -2.35534 | 0.83201  | 0.000538 | 0.003754 | 21    | 58    | 39    | 75     | 191    | 80     |
| Solyc08g068780.1.1 | -2.35476 | 5.013915 | 2.43E-06 | 3.57E-05 | 767   | 802   | 426   | 3084   | 1671   | 1152   |
| Solyc06g005810.2.1 | -2.35345 | 4.618803 | 2.65E-09 | 8.22E-08 | 386   | 741   | 485   | 1345   | 2227   | 1136   |
| Solyc06g053550.2.1 | -2.35322 | 3.206182 | 3.25E-06 | 4.60E-05 | 100   | 343   | 195   | 398    | 1028   | 401    |
| Solyc02g071870.2.1 | -2.35209 | 6.989556 | 5.45E-07 | 9.69E-06 | 2898  | 3261  | 1768  | 8029   | 9906   | 5946   |
| Solyc04g016260.2.1 | -2.35164 | 7.537864 | 2.19E-07 | 4.31E-06 | 3467  | 5554  | 3044  | 10431  | 17654  | 7931   |
| Solyc06g053710.2.1 | -2.3515  | 8.077388 | 4.14E-07 | 7.59E-06 | 3287  | 10703 | 4923  | 13102  | 25684  | 13192  |
| Solyc08g078190.1.1 | -2.34674 | 5.119891 | 1.53E-07 | 3.10E-06 | 415   | 1486  | 5178  | 1319   | 3064   | 2133   |
| Solyc08g062360.2.1 | -2.34629 | 5.879181 | 2.01E-05 | 0.000225 | 1388  | 2110  | 391   | 2422   | 6078   | 2941   |

|                    |          |          |          |          |       |       |       |       |       |       |
|--------------------|----------|----------|----------|----------|-------|-------|-------|-------|-------|-------|
| Solyc12g010440.1.1 | -2.34173 | 4.838338 | 2.46E-07 | 4.80E-06 | 657   | 842   | 333   | 2124  | 2163  | 1112  |
| Solyc05g006510.1.1 | -2.34088 | 5.382402 | 3.26E-06 | 4.61E-05 | 1182  | 652   | 577   | 2630  | 3564  | 1765  |
| Solyc04g071890.2.1 | -2.3388  | 9.622194 | 2.30E-06 | 3.40E-05 | 13936 | 20886 | 15906 | 68877 | 42668 | 32034 |
| Solyc11g013120.1.1 | -2.33783 | 5.679074 | 2.29E-06 | 3.38E-05 | 334   | 2093  | 1274  | 3044  | 4102  | 2479  |
| Solyc11g012260.1.1 | -2.33401 | 5.585492 | 7.85E-08 | 1.72E-06 | 908   | 1597  | 696   | 3714  | 3264  | 1954  |
| Solyc06g036260.2.1 | -2.33392 | 6.064735 | 2.32E-05 | 0.000254 | 1844  | 1890  | 469   | 4138  | 6158  | 2641  |
| Solyc10g079860.1.1 | -2.33305 | 7.452327 | 0.000368 | 0.00273  | 1729  | 10667 | 1427  | 4268  | 14122 | 13405 |
| Solyc01g091330.2.1 | -2.33222 | 2.02931  | 6.38E-05 | 0.000616 | 44    | 129   | 103   | 276   | 241   | 217   |
| Solyc06g076450.2.1 | -2.33163 | 4.438109 | 1.33E-08 | 3.60E-07 | 368   | 777   | 331   | 1204  | 2022  | 947   |
| Solyc01g059880.2.1 | -2.32452 | 7.383609 | 3.27E-07 | 6.14E-06 | 2702  | 5498  | 3079  | 12258 | 13328 | 6170  |
| Solyc02g090330.2.1 | -2.32089 | 2.906055 | 3.83E-05 | 0.000396 | 162   | 182   | 129   | 686   | 320   | 324   |
| Solyc04g015820.1.1 | -2.31976 | 0.72657  | 0.001489 | 0.008889 | 25    | 64    | 25    | 153   | 69    | 69    |
| Solyc04g008110.2.1 | -2.31801 | 1.907554 | 5.39E-05 | 0.000533 | 45    | 135   | 80    | 241   | 332   | 144   |
| Solyc08g082440.2.1 | -2.317   | 7.514865 | 5.81E-07 | 1.02E-05 | 3616  | 5736  | 2788  | 12864 | 14425 | 7292  |
| Solyc06g063280.1.1 | -2.31441 | 1.308994 | 0.000448 | 0.003223 | 23    | 98    | 55    | 100   | 191   | 159   |
| Solyc03g097030.2.1 | -2.31422 | 4.744753 | 2.28E-08 | 5.79E-07 | 430   | 1014  | 423   | 1926  | 1813  | 1207  |
| Solyc01g096230.2.1 | -2.3105  | 5.34252  | 4.22E-09 | 1.26E-07 | 700   | 1304  | 733   | 2497  | 3498  | 1729  |
| Solyc12g056360.1.1 | -2.30931 | 3.996165 | 9.00E-07 | 1.50E-05 | 223   | 771   | 187   | 979   | 1356  | 692   |
| Solyc04g078630.2.1 | -2.30815 | 5.46455  | 5.57E-08 | 1.27E-06 | 897   | 1402  | 645   | 3170  | 3417  | 1737  |
| Solyc02g087350.1.1 | -2.30444 | 7.048898 | 4.10E-05 | 0.00042  | 1571  | 7390  | 1311  | 5061  | 15553 | 5759  |
| Solyc01g008140.2.1 | -2.30339 | 6.866884 | 3.27E-07 | 6.14E-06 | 2308  | 3449  | 1968  | 8428  | 8647  | 4771  |
| Solyc10g049240.1.1 | -2.30187 | 2.393798 | 3.78E-05 | 0.000392 | 117   | 122   | 93    | 357   | 315   | 273   |
| Solyc09g009840.1.1 | -2.30066 | 6.628533 | 2.51E-07 | 4.88E-06 | 1681  | 3424  | 1700  | 4347  | 9055  | 5320  |
| Solyc02g093990.2.1 | -2.30052 | 1.506082 | 0.000703 | 0.004717 | 76    | 83    | 23    | 201   | 200   | 122   |
| Solyc04g016190.1.1 | -2.2999  | 2.405779 | 0.000651 | 0.004418 | 91    | 257   | 41    | 523   | 217   | 201   |
| Solyc06g051620.2.1 | -2.2991  | 4.600986 | 1.75E-08 | 4.57E-07 | 433   | 812   | 409   | 1617  | 1589  | 1219  |
| Solyc09g008250.2.1 | -2.29752 | 4.457381 | 1.27E-08 | 3.45E-07 | 329   | 746   | 442   | 1317  | 1472  | 1203  |
| Solyc12g009520.1.1 | -2.29709 | 5.120734 | 3.26E-08 | 7.91E-07 | 715   | 1094  | 518   | 1590  | 3088  | 1872  |
| Solyc01g067380.2.1 | -2.29493 | 6.280414 | 6.12E-06 | 8.00E-05 | 2097  | 1822  | 942   | 5783  | 5818  | 2992  |
| Solyc06g065310.2.1 | -2.29277 | 3.117172 | 1.68E-05 | 0.000193 | 145   | 289   | 160   | 817   | 441   | 312   |
| Solyc01g094960.2.1 | -2.28925 | 6.764193 | 1.33E-07 | 2.75E-06 | 1673  | 3922  | 2024  | 6081  | 9210  | 5188  |
| Solyc04g074730.1.1 | -2.2891  | 7.332766 | 3.12E-06 | 4.43E-05 | 2679  | 4811  | 3399  | 5003  | 17765 | 8590  |
| Solyc10g085810.1.1 | -2.28795 | 5.213353 | 4.66E-08 | 1.09E-06 | 764   | 1059  | 631   | 2745  | 2855  | 1389  |
| Solyc04g012010.2.1 | -2.28713 | 1.769914 | 9.69E-05 | 0.000879 | 45    | 123   | 71    | 147   | 310   | 183   |
| Solyc10g008890.2.1 | -2.28609 | 4.382486 | 4.01E-05 | 0.000413 | 602   | 453   | 233   | 1973  | 960   | 802   |
| Solyc02g080080.2.1 | -2.2854  | 6.546257 | 7.00E-06 | 8.96E-05 | 1718  | 3746  | 1168  | 2888  | 9573  | 5403  |
| Solyc10g049890.1.1 | -2.2853  | 3.484701 | 4.17E-07 | 7.62E-06 | 149   | 374   | 256   | 569   | 1049  | 519   |
| Solyc06g051540.2.1 | -2.2851  | 5.072455 | 1.73E-08 | 4.50E-07 | 615   | 1195  | 522   | 2344  | 2658  | 1337  |
| Solyc01g009820.2.1 | -2.28504 | 6.528422 | 1.32E-07 | 2.73E-06 | 1750  | 2906  | 1595  | 5579  | 7572  | 4205  |
| Solyc11g068430.1.1 | -2.2837  | 6.69975  | 1.63E-07 | 3.29E-06 | 1431  | 3625  | 2245  | 6456  | 8313  | 4716  |
| Solyc07g056110.2.1 | -2.28106 | 6.141682 | 1.04E-07 | 2.21E-06 | 1265  | 2294  | 1275  | 3638  | 6853  | 3109  |
| Solyc01g087070.2.1 | -2.28036 | 2.888191 | 4.47E-05 | 0.000453 | 85    | 309   | 147   | 209   | 701   | 474   |
| Solyc07g005520.1.1 | -2.27961 | 4.313905 | 1.43E-05 | 0.000166 | 604   | 344   | 246   | 922   | 1932  | 955   |
| Solyc04g078290.2.1 | -2.27955 | 7.454273 | 2.27E-06 | 3.37E-05 | 3320  | 7152  | 2032  | 10432 | 14072 | 8293  |
| Solyc11g066860.1.1 | -2.27942 | 6.590778 | 8.35E-05 | 0.000776 | 1059  | 3903  | 2083  | 1669  | 11566 | 5650  |
| Solyc06g076440.1.1 | -2.27782 | 4.572099 | 4.34E-07 | 7.91E-06 | 555   | 643   | 355   | 1870  | 1524  | 973   |
| Solyc10g005630.2.1 | -2.27526 | 6.396666 | 2.74E-07 | 5.26E-06 | 1050  | 3362  | 1710  | 4249  | 7203  | 4342  |
| Solyc04g072930.1.1 | -2.27404 | 5.608126 | 1.47E-07 | 3.00E-06 | 1125  | 1324  | 748   | 3211  | 3750  | 2142  |
| Solyc08g008330.2.1 | -2.2726  | 5.56402  | 1.66E-08 | 4.35E-07 | 836   | 1329  | 1015  | 2603  | 3713  | 2449  |
| Solyc06g008890.2.1 | -2.27159 | 4.10193  | 1.43E-07 | 2.94E-06 | 257   | 572   | 368   | 1369  | 1139  | 662   |
| Solyc12g096570.1.1 | -2.27095 | 5.380115 | 3.15E-05 | 0.000334 | 197   | 2051  | 1001  | 1956  | 3848  | 2093  |
| Solyc06g076050.2.1 | -2.27031 | 5.145409 | 5.56E-07 | 9.86E-06 | 904   | 921   | 464   | 2479  | 2380  | 1627  |
| Solyc11g015890.1.1 | -2.26751 | 3.55489  | 3.91E-06 | 5.41E-05 | 289   | 344   | 144   | 777   | 992   | 458   |
| Solyc06g075580.2.1 | -2.26619 | 4.567127 | 8.76E-05 | 0.000807 | 664   | 282   | 455   | 2193  | 1024  | 983   |
| Solyc04g064860.1.1 | -2.26572 | 3.280213 | 6.12E-06 | 8.00E-05 | 226   | 316   | 115   | 601   | 795   | 426   |
| Solyc08g079520.2.1 | -2.26546 | 7.050685 | 2.85E-07 | 5.43E-06 | 2433  | 4312  | 2394  | 7159  | 12587 | 5702  |
| Solyc06g050810.2.1 | -2.26377 | 4.842051 | 2.02E-06 | 3.05E-05 | 786   | 714   | 337   | 2045  | 1998  | 1245  |
| Solyc08g069060.2.1 | -2.26271 | 7.820694 | 2.67E-06 | 3.86E-05 | 5305  | 6580  | 3165  | 14599 | 19885 | 8682  |
| Solyc08g081480.2.1 | -2.26175 | 5.531829 | 3.17E-07 | 5.96E-06 | 830   | 914   | 1241  | 2402  | 4566  | 1962  |
| Solyc03g007290.2.1 | -2.26075 | 3.401761 | 7.81E-06 | 9.87E-05 | 230   | 365   | 133   | 850   | 758   | 365   |
| Solyc08g081370.1.1 | -2.26073 | 5.200464 | 1.37E-08 | 3.70E-07 | 491   | 1273  | 847   | 1997  | 3121  | 1781  |
| Solyc08g077550.2.1 | -2.26018 | 3.634076 | 5.26E-07 | 9.40E-06 | 255   | 316   | 248   | 828   | 1037  | 483   |
| Solyc09g074480.1.1 | -2.25779 | 1.182536 | 0.000576 | 0.003973 | 50    | 75    | 29    | 127   | 146   | 131   |
| Solyc06g064660.2.1 | -2.25768 | 3.396351 | 8.43E-07 | 1.42E-05 | 157   | 296   | 266   | 606   | 782   | 544   |
| Solyc03g123560.2.1 | -2.25598 | 6.285533 | 1.72E-05 | 0.000196 | 2222  | 1986  | 806   | 4417  | 4951  | 4594  |
| Solyc02g084650.2.1 | -2.2535  | 5.643989 | 7.07E-08 | 1.57E-06 | 1064  | 1371  | 905   | 3287  | 3835  | 2188  |
| Solyc02g092990.1.1 | -2.25041 | 6.724441 | 1.90E-06 | 2.91E-05 | 2170  | 4000  | 1324  | 5121  | 10297 | 4851  |
| Solyc12g005340.1.1 | -2.24923 | 7.032534 | 6.95E-06 | 8.91E-05 | 2551  | 5783  | 1284  | 7221  | 11564 | 5972  |
| Solyc03g115770.2.1 | -2.24817 | 3.736994 | 0.000152 | 0.001288 | 142   | 173   | 541   | 545   | 1531  | 555   |
| Solyc12g017480.1.1 | -2.247   | 3.092941 | 4.67E-05 | 0.00047  | 191   | 291   | 107   | 766   | 438   | 328   |
| Solyc07g040890.1.1 | -2.24693 | 4.564546 | 8.63E-05 | 0.000797 | 623   | 901   | 124   | 1763  | 1718  | 918   |
| Solyc02g089110.2.1 | -2.24631 | 5.996912 | 2.29E-07 | 4.49E-06 | 1344  | 1945  | 1067  | 4266  | 5009  | 2668  |
| Solyc09g092000.2.1 | -2.24577 | 5.326411 | 8.47E-09 | 2.39E-07 | 702   | 1319  | 785   | 2131  | 3296  | 2036  |
| Solyc05g012850.2.1 | -2.2437  | 5.010961 | 1.27E-05 | 0.00015  | 375   | 1511  | 579   | 770   | 3926  | 1663  |
| Solyc06g071990.2.1 | -2.24325 | 5.472498 | 8.64E-08 | 1.88E-06 | 606   | 1239  | 1225  | 2172  | 3953  | 2226  |
| Solyc04g080820.2.1 | -2.24058 | 8.964626 | 3.51E-06 | 4.91E-05 | 5344  | 17562 | 13372 | 34466 | 40688 | 19089 |
| RRNA_11_2          | -2.2392  | 7.099589 | 6.06E-06 | 7.94E-05 | 3019  | 2979  | 2926  | 5171  | 10627 | 9041  |
| Solyc01g007910.2.1 | -2.23916 | 7.745704 | 7.76E-07 | 1.32E-05 | 3154  | 7847  | 4498  | 9900  | 19848 | 10819 |
| Solyc04g079840.2.1 | -2.23768 | 5.130583 | 4.56E-08 | 1.06E-06 | 775   | 1059  | 554   | 1954  | 3152  | 1537  |
| Solyc01g073740.2.1 | -2.23742 | 8.948351 | 5.52E-07 | 9.81E-06 | 8777  | 15408 | 10194 | 31120 | 37315 | 22943 |
| Solyc09g089640.2.1 | -2.23703 | 6.118981 | 5.74E-07 | 1.01E-05 | 1387  | 2501  | 1033  | 3121  | 6411  | 3577  |
| Solyc11g008720.1.1 | -2.23684 | 4.079072 | 3.88E-07 | 7.15E-06 | 380   | 370   | 350   | 990   | 1551  | 683   |
| Solyc01g095490.2.1 | -2.23657 | 5.633252 | 7.55E-08 | 1.66E-06 | 974   | 1428  | 987   | 3460  | 3991  | 1890  |
| Solyc03g044900.2.1 | -2.23405 | 6.56025  | 6.19E-07 | 1.08E-05 | 1907  | 2291  | 2088  | 6432  | 6926  | 4095  |

|                      |          |          |          |          |       |       |       |        |        |       |
|----------------------|----------|----------|----------|----------|-------|-------|-------|--------|--------|-------|
| Solyc09g098070.2.1   | -2.23355 | 6.596947 | 2.80E-07 | 5.35E-06 | 1883  | 3229  | 1674  | 5981   | 7888   | 4249  |
| Solyc06g060700.1.1   | -2.22868 | 1.470521 | 0.000375 | 0.002772 | 40    | 132   | 38    | 140    | 229    | 142   |
| Solyc03g116890.2.1   | -2.22815 | 7.138836 | 3.26E-06 | 4.61E-05 | 2798  | 5869  | 1651  | 8313   | 11771  | 6330  |
| Solyc09g082470.2.1   | -2.22758 | 7.41826  | 5.37E-07 | 9.57E-06 | 3305  | 5069  | 3429  | 10294  | 14828  | 7202  |
| RRNA_11_14           | -2.22652 | 7.18451  | 4.00E-06 | 5.51E-05 | 3186  | 3187  | 3172  | 5993   | 11786  | 8846  |
| Solyc07g062620.2.1   | -2.2254  | 7.065821 | 3.39E-07 | 6.34E-06 | 2038  | 4360  | 3130  | 7571   | 10637  | 6601  |
| Solyc02g083380.2.1   | -2.22395 | 3.879694 | 2.87E-05 | 0.000308 | 462   | 282   | 175   | 826    | 1069   | 784   |
| Solyc06g065570.2.1   | -2.2231  | 6.717799 | 8.25E-07 | 1.40E-05 | 2390  | 3035  | 1739  | 5700   | 9194   | 4899  |
| Solyc02g088460.2.1   | -2.21698 | 8.215108 | 2.61E-06 | 3.79E-05 | 7051  | 7672  | 5171  | 20362  | 21749  | 12762 |
| Solyc07g043310.2.1   | -2.21663 | 9.369961 | 2.33E-06 | 3.43E-05 | 14894 | 19780 | 10805 | 37950  | 61830  | 26683 |
| Solyc10g083230.1.1   | -2.21586 | 0.714498 | 0.001166 | 0.007235 | 38    | 46    | 26    | 103    | 128    | 70    |
| Solyc12g005220.1.1   | -2.21522 | 4.802254 | 3.18E-08 | 7.74E-07 | 497   | 889   | 583   | 1230   | 2534   | 1465  |
| Solyc10g080770.1.1   | -2.21518 | 8.221569 | 1.56E-06 | 2.43E-05 | 6554  | 9484  | 4737  | 18331  | 26010  | 12131 |
| Solyc11g010420.1.1   | -2.21491 | 1.98472  | 0.00013  | 0.001132 | 95    | 111   | 61    | 231    | 285    | 202   |
| Solyc03g097050.2.1   | -2.21084 | 3.029614 | 1.04E-05 | 0.000126 | 134   | 249   | 192   | 611    | 676    | 259   |
| Solyc03g083590.2.1   | -2.20921 | 2.443425 | 2.55E-05 | 0.000276 | 77    | 187   | 129   | 278    | 496    | 250   |
| Solyc08g062860.2.1   | -2.20814 | 5.508623 | 1.02E-07 | 2.18E-06 | 889   | 1531  | 816   | 3349   | 3243   | 1810  |
| Solyc09g090040.2.1   | -2.20808 | 7.571796 | 7.87E-06 | 9.92E-05 | 5049  | 4772  | 2798  | 12919  | 15019  | 7603  |
| Solyc05g051050.2.1   | -2.20593 | 4.82519  | 4.37E-07 | 7.94E-06 | 688   | 790   | 448   | 1362   | 3003   | 1144  |
| Solyc08g078960.2.1   | -2.20589 | 5.660036 | 3.02E-07 | 5.72E-06 | 1122  | 1448  | 905   | 3658   | 3831   | 1926  |
| Solyc08g063030.2.1   | -2.20577 | 1.19352  | 0.001275 | 0.007788 | 50    | 40    | 57    | 191    | 137    | 84    |
| Solyc01g112220.2.1   | -2.20574 | 5.732684 | 5.99E-06 | 7.86E-05 | 1354  | 1757  | 587   | 3993   | 3750   | 2068  |
| Solyc04g009920.2.1   | -2.20446 | 6.673868 | 3.68E-07 | 6.85E-06 | 1757  | 3512  | 2089  | 6693   | 8340   | 4106  |
| Solyc09g008200.2.1   | -2.20299 | 8.946347 | 8.28E-07 | 1.40E-05 | 7542  | 17112 | 11209 | 29926  | 39866  | 22050 |
| Solyc10g054930.1.1   | -2.20054 | 4.313447 | 4.66E-08 | 1.09E-06 | 343   | 698   | 398   | 1294   | 1519   | 864   |
| Solyc06g068650.2.1   | -2.19981 | 6.8496   | 1.61E-05 | 0.000186 | 910   | 4882  | 3128  | 6125   | 11846  | 4395  |
| Solyc02g093830.2.1   | -2.19971 | 8.893677 | 9.29E-07 | 1.55E-05 | 7378  | 17700 | 9967  | 30176  | 36308  | 21386 |
| Solyc09g061280.2.1   | -2.19897 | 3.867798 | 8.60E-07 | 1.45E-05 | 260   | 529   | 272   | 612    | 1620   | 616   |
| Solyc05g005190.2.1   | -2.19882 | 7.926293 | 1.13E-06 | 1.83E-05 | 3813  | 8104  | 5659  | 17191  | 16265  | 10833 |
| Solyc04g054150.1.1   | -2.19831 | 2.097286 | 9.71E-05 | 0.00088  | 99    | 111   | 79    | 211    | 363    | 217   |
| Solyc03g117350.1.1   | -2.1973  | 4.609047 | 3.71E-08 | 8.83E-07 | 432   | 804   | 512   | 1669   | 1885   | 982   |
| Solyc05g051570.2.1   | -2.19605 | 6.45677  | 4.44E-07 | 8.06E-06 | 1849  | 2817  | 1536  | 5141   | 7533   | 3814  |
| Solyc11g068460.1.1   | -2.19207 | 5.669724 | 3.53E-07 | 6.60E-06 | 1207  | 1365  | 900   | 3256   | 4111   | 2127  |
| Solyc09g075450.2.1   | -2.1894  | 8.306106 | 3.79E-06 | 5.25E-05 | 7913  | 8610  | 5046  | 18771  | 24491  | 15049 |
| Solyc05g054800.1.1   | -2.18913 | 8.017726 | 1.92E-06 | 2.93E-05 | 5121  | 9834  | 4045  | 16809  | 21741  | 10174 |
| RRNA_11_1            | -2.18866 | 6.148259 | 2.24E-06 | 3.32E-05 | 1582  | 1854  | 1417  | 2669   | 6300   | 4151  |
| Solyc03g113380.2.1   | -2.18776 | 6.1434   | 6.18E-07 | 1.08E-05 | 1565  | 2295  | 1144  | 4449   | 5790   | 2962  |
| Solyc08g062820.2.1   | -2.18742 | 6.543827 | 2.06E-06 | 3.09E-05 | 2260  | 2208  | 1794  | 4762   | 8593   | 4264  |
| Solyc02g062500.2.1   | -2.1867  | 4.171118 | 0.000506 | 0.003555 | 88    | 966   | 432   | 486    | 2558   | 653   |
| Solyc04g016270.1.1   | -2.18647 | 4.828467 | 2.74E-07 | 5.25E-06 | 709   | 781   | 452   | 1462   | 2528   | 1337  |
| Solyc01g102700.2.1   | -2.18554 | 5.831993 | 7.62E-07 | 1.30E-05 | 1272  | 1962  | 841   | 3635   | 3960   | 2752  |
| Solyc10g074740.1.1   | -2.18492 | 7.54778  | 5.08E-06 | 6.80E-05 | 3149  | 8556  | 2701  | 13446  | 13745  | 7393  |
| RRNA_SL2.40sc04870_1 | -2.18444 | 7.130703 | 7.82E-06 | 9.87E-05 | 3024  | 3012  | 3363  | 5595   | 10794  | 8889  |
| Solyc12g014430.1.1   | -2.18433 | 6.407033 | 4.22E-05 | 0.000431 | 619   | 2606  | 3040  | 5571   | 5166   | 4397  |
| Solyc09g074320.2.1   | -2.18393 | 8.287203 | 1.05E-06 | 1.72E-05 | 4613  | 12040 | 6750  | 19433  | 25950  | 13058 |
| Solyc12g005200.1.1   | -2.18385 | 6.447837 | 3.39E-05 | 0.000357 | 2494  | 2021  | 1248  | 7491   | 4819   | 3375  |
| Solyc01g107900.2.1   | -2.18342 | 9.483844 | 4.33E-05 | 0.000441 | 21342 | 18541 | 7903  | 47368  | 53680  | 30978 |
| Solyc08g080680.2.1   | -2.18138 | 6.826188 | 1.20E-06 | 1.94E-05 | 2564  | 2900  | 2299  | 7042   | 8814   | 5103  |
| Solyc03g114600.2.1   | -2.18076 | 5.689168 | 7.08E-07 | 1.22E-05 | 964   | 2162  | 758   | 3666   | 4119   | 1876  |
| Solyc07g065250.2.1   | -2.18035 | 5.266058 | 5.30E-07 | 9.47E-06 | 466   | 1577  | 901   | 1617   | 4197   | 1657  |
| Solyc12g087950.1.1   | -2.17822 | 6.158207 | 9.43E-07 | 1.57E-05 | 1691  | 2086  | 1193  | 4427   | 5170   | 3429  |
| Solyc06g069150.1.1   | -2.17821 | 5.394143 | 0.00013  | 0.001128 | 202   | 2147  | 1099  | 1474   | 3708   | 2557  |
| Solyc03g123370.2.1   | -2.17761 | 9.970095 | 4.19E-06 | 5.75E-05 | 20783 | 36850 | 15657 | 71697  | 74951  | 39084 |
| Solyc08g080640.1.1   | -2.17661 | 9.456131 | 2.33E-05 | 0.000255 | 17419 | 15788 | 13816 | 57012  | 35832  | 31447 |
| Solyc04g015570.2.1   | -2.17606 | 4.809344 | 5.68E-06 | 7.51E-05 | 824   | 742   | 321   | 1813   | 2171   | 1200  |
| Solyc10g079130.1.1   | -2.17568 | 8.075096 | 1.54E-06 | 2.41E-05 | 5311  | 9385  | 4904  | 18830  | 20874  | 10444 |
| Solyc04g074710.2.1   | -2.17403 | 4.030442 | 4.35E-07 | 7.92E-06 | 255   | 720   | 282   | 777    | 1486   | 798   |
| Solyc11g007890.1.1   | -2.17305 | 3.375118 | 5.20E-05 | 0.000517 | 209   | 508   | 88    | 541    | 858    | 516   |
| Solyc07g063180.2.1   | -2.17048 | 2.267395 | 0.000106 | 0.000949 | 55    | 184   | 125   | 271    | 318    | 268   |
| Solyc11g069600.1.1   | -2.16872 | 7.083034 | 6.75E-07 | 1.17E-05 | 2470  | 4358  | 2977  | 6835   | 12074  | 6462  |
| Solyc08g081680.1.1   | -2.16724 | 2.25016  | 0.001011 | 0.006399 | 144   | 54    | 96    | 235    | 497    | 184   |
| Solyc07g054830.2.1   | -2.16555 | 6.788757 | 5.72E-07 | 1.01E-05 | 1684  | 4289  | 2381  | 6444   | 8941   | 5078  |
| Solyc04g049090.2.1   | -2.16472 | 9.791152 | 3.73E-05 | 0.000387 | 25381 | 25452 | 10065 | 60233  | 69070  | 35192 |
| Solyc12g099340.1.1   | -2.16471 | 6.614398 | 2.93E-06 | 4.19E-05 | 2458  | 2527  | 1728  | 6459   | 7719   | 4006  |
| Solyc01g104620.2.1   | -2.16439 | 2.284222 | 0.000138 | 0.001192 | 109   | 146   | 88    | 206    | 327    | 323   |
| Solyc08g075230.1.1   | -2.16105 | 1.653175 | 0.000348 | 0.002607 | 36    | 100   | 95    | 158    | 247    | 166   |
| Solyc09g074340.2.1   | -2.15991 | 3.310115 | 7.44E-06 | 9.47E-05 | 184   | 352   | 194   | 796    | 607    | 387   |
| Solyc02g088630.2.1   | -2.15963 | 5.491279 | 7.58E-08 | 1.67E-06 | 886   | 1340  | 987   | 2518   | 4089   | 1882  |
| Solyc11g068770.1.1   | -2.15836 | 6.163649 | 1.94E-06 | 2.95E-05 | 780   | 3197  | 1683  | 4315   | 5517   | 3333  |
| Solyc06g074960.2.1   | -2.15829 | 5.810198 | 3.04E-07 | 5.75E-06 | 1138  | 1920  | 1035  | 3652   | 4019   | 2557  |
| Solyc03g115850.2.1   | -2.1573  | 4.722562 | 7.41E-07 | 1.27E-05 | 297   | 1285  | 538   | 1272   | 2401   | 1270  |
| Solyc01g097330.2.1   | -2.15682 | 6.601228 | 1.09E-05 | 0.000131 | 2609  | 2546  | 1499  | 7446   | 6168   | 3961  |
| Solyc04g016460.2.1   | -2.15661 | 2.108664 | 0.000284 | 0.002191 | 119   | 122   | 56    | 204    | 355    | 229   |
| Solyc07g066080.2.1   | -2.15409 | 6.688717 | 3.21E-06 | 4.55E-05 | 1174  | 4294  | 2571  | 4878   | 9674   | 4870  |
| Solyc07g049700.1.1   | -2.15252 | 3.66923  | 1.20E-06 | 1.94E-05 | 267   | 451   | 215   | 633    | 1216   | 558   |
| Solyc04g083160.1.1   | -2.15119 | 3.015952 | 2.04E-05 | 0.000228 | 183   | 203   | 174   | 371    | 606    | 476   |
| Solyc08g014570.2.1   | -2.15035 | 7.356367 | 1.42E-06 | 2.24E-05 | 2930  | 5988  | 3319  | 11173  | 12836  | 6402  |
| Solyc03g097230.1.1   | -2.14905 | 3.315511 | 0.000772 | 0.005105 | 42    | 269   | 429   | 570    | 746    | 494   |
| Solyc03g112970.1.1   | -2.14806 | 3.174225 | 3.71E-05 | 0.000386 | 241   | 295   | 106   | 519    | 665    | 452   |
| Solyc12g044940.1.1   | -2.14752 | 6.948114 | 4.32E-05 | 0.00044  | 3563  | 3875  | 1240  | 8825   | 8817   | 4981  |
| Solyc05g053330.2.1   | -2.14614 | 5.58099  | 4.86E-07 | 8.75E-06 | 737   | 2277  | 786   | 2531   | 4267   | 2162  |
| Solyc05g018050.1.1   | -2.14555 | 1.681979 | 0.000972 | 0.006188 | 38    | 138   | 74    | 303    | 147    | 114   |
| Solyc01g097270.2.1   | -2.14366 | 10.9863  | 0.000127 | 0.00111  | 64249 | 43487 | 26441 | 154923 | 110681 | 93416 |
| Solyc01g097220.1.1   | -2.14182 | 2.169939 | 0.00024  | 0.001905 | 91    | 102   | 118   | 162    | 450    | 233   |

|                      |          |          |          |          |       |       |       |       |       |       |
|----------------------|----------|----------|----------|----------|-------|-------|-------|-------|-------|-------|
| Solyc06g062990.1.1   | -2.14148 | 5.8767   | 2.96E-07 | 5.61E-06 | 1022  | 2319  | 1134  | 3178  | 5138  | 2649  |
| Solyc06g075190.1.1   | -2.14078 | 6.49842  | 9.44E-07 | 1.57E-05 | 1898  | 3266  | 1538  | 5351  | 6701  | 4398  |
| Solyc02g086770.2.1   | -2.13934 | 2.423327 | 0.000832 | 0.005432 | 166   | 138   | 60    | 453   | 236   | 241   |
| Solyc01g080800.2.1   | -2.13891 | 4.457554 | 1.12E-05 | 0.000134 | 518   | 917   | 225   | 945   | 2390  | 914   |
| Solyc07g007820.2.1   | -2.1378  | 7.350344 | 1.15E-06 | 1.86E-05 | 3052  | 5924  | 3240  | 10025 | 12894 | 7171  |
| Solyc05g056200.1.1   | -2.13645 | 4.5325   | 2.85E-07 | 5.43E-06 | 529   | 739   | 405   | 1190  | 2231  | 969   |
| Solyc07g062670.1.1   | -2.12957 | 1.855143 | 0.000518 | 0.003625 | 79    | 136   | 54    | 166   | 438   | 112   |
| Solyc06g008600.2.1   | -2.12548 | 6.213309 | 4.88E-06 | 6.58E-05 | 1758  | 2177  | 1377  | 5941  | 4518  | 2894  |
| Solyc09g059040.2.1   | -2.12453 | 8.558671 | 2.20E-06 | 3.28E-05 | 6963  | 15192 | 6830  | 21333 | 29273 | 18277 |
| Solyc08g081240.2.1   | -2.12386 | 7.109536 | 1.59E-06 | 2.47E-05 | 2579  | 5168  | 2720  | 9333  | 10893 | 5353  |
| Solyc11g065940.1.1   | -2.12192 | 7.411379 | 2.76E-06 | 3.98E-05 | 2244  | 7058  | 4087  | 9139  | 13686 | 8371  |
| Solyc05g013880.1.1   | -2.12149 | 4.900995 | 1.94E-05 | 0.000218 | 900   | 868   | 326   | 2251  | 1873  | 1245  |
| Solyc01g105370.2.1   | -2.11907 | 7.982626 | 8.66E-05 | 0.0008   | 8229  | 5951  | 2922  | 15907 | 20101 | 10665 |
| Solyc10g054030.1.1   | -2.11858 | 6.216959 | 1.89E-06 | 2.90E-05 | 1631  | 2626  | 1280  | 5360  | 5324  | 2918  |
| Solyc07g049580.2.1   | -2.11535 | 4.153631 | 1.91E-06 | 2.91E-05 | 433   | 390   | 407   | 1185  | 1373  | 716   |
| Solyc11g007590.1.1   | -2.11495 | 6.644227 | 2.06E-06 | 3.09E-05 | 2167  | 3046  | 2077  | 7102  | 6620  | 4316  |
| Solyc07g045350.2.1   | -2.11336 | 9.256262 | 2.17E-05 | 0.000239 | 7369  | 20885 | 18589 | 47623 | 34339 | 26510 |
| Solyc01g008300.1.1   | -2.11171 | 4.697559 | 2.45E-06 | 3.58E-05 | 476   | 730   | 686   | 2242  | 1688  | 807   |
| Solyc01g106500.2.1   | -2.11075 | 6.913173 | 1.47E-06 | 2.32E-05 | 2014  | 5001  | 2414  | 5963  | 10539 | 5823  |
| Solyc01g010060.2.1   | -2.10944 | 3.39923  | 0.000116 | 0.001026 | 127   | 640   | 141   | 387   | 1074  | 529   |
| Solyc08g077920.2.1   | -2.10839 | 6.837543 | 2.59E-06 | 3.76E-05 | 1505  | 4449  | 2993  | 5521  | 9763  | 5770  |
| Solyc03g114360.2.1   | -2.10768 | 5.950263 | 1.54E-06 | 2.41E-05 | 1446  | 2199  | 967   | 3700  | 4470  | 3002  |
| Solyc06g072610.2.1   | -2.10676 | 6.148136 | 6.96E-07 | 1.20E-05 | 1359  | 2599  | 1434  | 4645  | 5684  | 2794  |
| Solyc10g085000.1.1   | -2.1062  | 6.411473 | 6.42E-05 | 0.000619 | 2777  | 1816  | 1134  | 5893  | 6352  | 3366  |
| Solyc07g064740.2.1   | -2.10462 | 5.346828 | 3.20E-05 | 0.000339 | 1143  | 1066  | 647   | 3827  | 2164  | 1289  |
| Solyc08g076050.2.1   | -2.1025  | 4.236435 | 2.97E-05 | 0.000318 | 210   | 917   | 425   | 517   | 2021  | 1028  |
| Solyc01g091910.2.1   | -2.10096 | 5.152151 | 7.72E-08 | 1.70E-06 | 572   | 1222  | 913   | 1969  | 3086  | 1552  |
| Solyc04g006940.2.1   | -2.10062 | 5.913969 | 2.65E-06 | 3.84E-05 | 775   | 2818  | 1316  | 2646  | 5475  | 3058  |
| RRNA_11_6            | -2.10039 | 7.110309 | 1.86E-05 | 0.00021  | 3311  | 3038  | 3297  | 5749  | 9854  | 8823  |
| Solyc01g097230.2.1   | -2.09989 | 4.695674 | 1.11E-07 | 2.34E-06 | 528   | 907   | 518   | 1292  | 2342  | 1192  |
| Solyc08g066970.2.1   | -2.09614 | 4.783943 | 2.80E-07 | 5.36E-06 | 640   | 921   | 485   | 1845  | 1993  | 1169  |
| Solyc11g008420.1.1   | -2.09611 | 3.489488 | 3.15E-06 | 4.46E-05 | 162   | 414   | 294   | 652   | 774   | 579   |
| Solyc05g011920.2.1   | -2.09557 | 5.465936 | 4.10E-07 | 7.51E-06 | 820   | 1916  | 756   | 2064  | 4057  | 2110  |
| Solyc04g016250.2.1   | -2.09542 | 1.037569 | 0.001055 | 0.006623 | 32    | 85    | 43    | 143   | 151   | 78    |
| Solyc02g087260.1.1   | -2.09491 | 4.768231 | 1.31E-07 | 2.73E-06 | 443   | 1094  | 599   | 1761  | 2262  | 1040  |
| Solyc12g094660.1.1   | -2.094   | 7.482628 | 2.31E-06 | 3.41E-05 | 3000  | 7442  | 3670  | 10421 | 14839 | 7771  |
| RRNA_SL2.40sc06748_1 | -2.09346 | 6.214612 | 1.13E-05 | 0.000135 | 1623  | 1668  | 1963  | 2752  | 6219  | 4473  |
| Solyc05g053320.1.1   | -2.09324 | 3.50482  | 2.39E-06 | 3.51E-05 | 195   | 356   | 300   | 723   | 860   | 487   |
| Solyc11g006500.1.1   | -2.09223 | 5.972583 | 1.07E-06 | 1.74E-05 | 1453  | 2069  | 1143  | 3823  | 5103  | 2652  |
| Solyc08g066210.2.1   | -2.08934 | 6.870635 | 2.08E-06 | 3.12E-05 | 2370  | 4635  | 2066  | 6337  | 10382 | 5076  |
| Solyc02g024050.2.1   | -2.08798 | 7.202447 | 3.50E-05 | 0.000367 | 3425  | 4305  | 3034  | 13499 | 7942  | 4852  |
| Solyc11g008390.1.1   | -2.08314 | 7.123961 | 1.72E-06 | 2.65E-05 | 2432  | 5581  | 2947  | 8474  | 11112 | 6016  |
| Solyc11g068610.1.1   | -2.08211 | 5.805366 | 1.22E-06 | 1.96E-05 | 1349  | 1694  | 1066  | 3399  | 4369  | 2457  |
| Solyc10g085350.1.1   | -2.0816  | 1.554059 | 0.000551 | 0.003827 | 41    | 86    | 93    | 177   | 214   | 136   |
| Solyc03g007430.2.1   | -2.07765 | 6.235024 | 3.38E-06 | 4.74E-05 | 1852  | 2656  | 1167  | 4389  | 6114  | 3326  |
| Solyc02g078180.2.1   | -2.07717 | 5.605913 | 2.28E-07 | 4.48E-06 | 838   | 2015  | 1010  | 2612  | 4083  | 2258  |
| Solyc05g006220.2.1   | -2.07565 | 5.069325 | 3.14E-07 | 5.91E-06 | 636   | 939   | 913   | 2318  | 2628  | 1241  |
| Solyc06g063190.2.1   | -2.07317 | 5.579397 | 1.19E-05 | 0.000142 | 1048  | 2129  | 624   | 1646  | 4657  | 2586  |
| Solyc04g009640.2.1   | -2.07175 | 2.089029 | 0.00017  | 0.001415 | 59    | 169   | 109   | 245   | 367   | 174   |
| Solyc07g055080.2.1   | -2.07147 | 6.160386 | 0.001352 | 0.008195 | 2404  | 1483  | 987   | 8144  | 2540  | 1801  |
| Solyc09g082570.2.1   | -2.06824 | 4.112389 | 6.86E-06 | 8.81E-05 | 410   | 741   | 208   | 974   | 1200  | 904   |
| Solyc08g067290.2.1   | -2.06663 | 5.819381 | 0.000192 | 0.001572 | 1629  | 1480  | 926   | 5783  | 2589  | 1605  |
| Solyc02g088620.2.1   | -2.06549 | 7.073693 | 1.24E-05 | 0.000147 | 3666  | 4035  | 2168  | 8618  | 10678 | 5443  |
| Solyc06g075610.1.1   | -2.06495 | 7.167868 | 6.84E-06 | 8.79E-05 | 3256  | 5621  | 2295  | 9613  | 10844 | 5793  |
| Solyc02g083820.1.1   | -2.06362 | 5.423611 | 1.91E-07 | 3.82E-06 | 862   | 1659  | 834   | 2301  | 3853  | 1832  |
| Solyc07g0088620.1.1  | -2.06347 | 5.987681 | 2.22E-06 | 3.30E-05 | 1412  | 2567  | 991   | 3629  | 4917  | 2976  |
| Solyc07g006890.1.1   | -2.0628  | 8.127283 | 0.000217 | 0.00174  | 9287  | 8241  | 2536  | 18633 | 20552 | 11614 |
| Solyc03g006080.2.1   | -2.06086 | 5.688685 | 4.88E-06 | 6.57E-05 | 1391  | 1704  | 753   | 3366  | 3441  | 2398  |
| Solyc03g005260.2.1   | -2.06059 | 8.082814 | 4.30E-05 | 0.000438 | 7967  | 6284  | 4856  | 18131 | 16108 | 13407 |
| Solyc12g008950.1.1   | -2.06021 | 3.713522 | 0.000423 | 0.003066 | 500   | 241   | 133   | 738   | 1098  | 574   |
| Solyc02g087460.1.1   | -2.05488 | 6.752378 | 1.95E-06 | 2.96E-05 | 1983  | 4150  | 2371  | 7081  | 8076  | 4457  |
| Solyc01g067740.2.1   | -2.05469 | 10.05576 | 5.04E-05 | 0.000503 | 28827 | 37501 | 14175 | 77049 | 81094 | 37421 |
| Solyc07g065340.1.1   | -2.05366 | 6.452946 | 2.13E-05 | 0.000236 | 2123  | 3139  | 1445  | 2842  | 8208  | 5038  |
| Solyc08g014130.2.1   | -2.05278 | 6.628971 | 2.81E-05 | 0.000302 | 2841  | 2521  | 1741  | 7111  | 5733  | 4562  |
| Solyc02g089060.2.1   | -2.0509  | 4.734693 | 9.02E-07 | 1.51E-05 | 616   | 984   | 458   | 1142  | 2430  | 1338  |
| Solyc02g090970.1.1   | -2.04975 | 6.038349 | 1.22E-05 | 0.000145 | 754   | 3625  | 1323  | 3236  | 5499  | 3257  |
| Solyc09g090710.2.1   | -2.04963 | 4.543811 | 1.26E-06 | 2.02E-05 | 306   | 948   | 636   | 1019  | 2185  | 1124  |
| NCRNA_2_182          | -2.04921 | 2.561168 | 0.00035  | 0.002614 | 99    | 143   | 195   | 184   | 580   | 326   |
| Solyc06g073020.2.1   | -2.04833 | 4.870954 | 6.08E-07 | 1.07E-05 | 726   | 906   | 558   | 1376  | 2470  | 1487  |
| Solyc08g066980.2.1   | -2.04635 | 5.218917 | 3.28E-07 | 6.15E-06 | 891   | 1177  | 739   | 2134  | 2965  | 1684  |
| Solyc04g054260.2.1   | -2.04523 | 6.78517  | 2.80E-06 | 4.02E-05 | 2533  | 3426  | 2364  | 6475  | 8513  | 5020  |
| Solyc12g008770.1.1   | -2.04354 | 6.361688 | 6.64E-06 | 8.58E-05 | 2203  | 2387  | 1485  | 5211  | 6063  | 3592  |
| Solyc02g071820.2.1   | -2.03864 | 7.253985 | 0.0001   | 0.000905 | 1268  | 8955  | 3401  | 8481  | 10642 | 7981  |
| Solyc03g083140.2.1   | -2.03843 | 4.43557  | 1.45E-06 | 2.29E-05 | 552   | 745   | 354   | 1132  | 1924  | 945   |
| Solyc02g092230.2.1   | -2.03833 | 4.834257 | 2.78E-06 | 4.00E-05 | 641   | 1014  | 554   | 2360  | 1891  | 914   |
| Solyc01g098730.2.1   | -2.03806 | 6.967057 | 3.67E-06 | 5.11E-05 | 2258  | 5326  | 2562  | 6383  | 8832  | 6939  |
| Solyc03g063690.1.1   | -2.03701 | 3.070976 | 6.02E-05 | 0.000587 | 101   | 393   | 210   | 389   | 593   | 496   |
| Solyc12g099810.1.1   | -2.03687 | 5.223555 | 0.000106 | 0.000952 | 1306  | 752   | 518   | 2888  | 2344  | 1439  |
| Solyc08g082040.2.1   | -2.03551 | 4.849467 | 6.59E-07 | 1.14E-05 | 567   | 1186  | 560   | 1198  | 2853  | 1339  |
| Solyc02g063520.2.1   | -2.03424 | 5.217097 | 2.44E-06 | 3.57E-05 | 725   | 1864  | 520   | 1936  | 2896  | 1871  |
| Solyc06g051030.2.1   | -2.03415 | 6.630067 | 3.48E-05 | 0.000366 | 3006  | 2930  | 1353  | 5998  | 7912  | 4184  |
| Solyc03g033370.2.1   | -2.03344 | 2.869178 | 3.42E-05 | 0.00036  | 111   | 265   | 204   | 367   | 570   | 375   |
| Solyc01g079810.2.1   | -2.03065 | 5.852095 | 1.54E-06 | 2.40E-05 | 1352  | 1984  | 1118  | 3449  | 4287  | 2664  |
| Solyc03g117640.1.1   | -2.02966 | 4.389108 | 1.14E-06 | 1.86E-05 | 328   | 995   | 430   | 1039  | 2023  | 866   |



|                      |          |          |          |          |        |        |       |        |        |        |
|----------------------|----------|----------|----------|----------|--------|--------|-------|--------|--------|--------|
| Solyc08g080940.2.1   | -2.02735 | 8.297499 | 4.18E-05 | 0.000428 | 9238   | 8830   | 5072  | 22003  | 21854  | 12752  |
| Solyc01g079610.2.1   | -2.02653 | 7.662362 | 2.18E-05 | 0.00024  | 3449   | 6002   | 6168  | 15511  | 11447  | 8630   |
| Solyc02g091100.2.1   | -2.02482 | 8.730792 | 1.96E-05 | 0.00022  | 11702  | 12631  | 7398  | 24074  | 34914  | 18665  |
| Solyc02g085830.2.1   | -2.02394 | 5.3957   | 3.61E-06 | 5.03E-05 | 1078   | 1502   | 675   | 1661   | 3898   | 2182   |
| Solyc05g055470.2.1   | -2.02038 | 7.194323 | 5.02E-06 | 6.74E-05 | 2929   | 5517   | 3204  | 9962   | 11178  | 5562   |
| Solyc10g083610.1.1   | -2.01958 | 7.12998  | 3.46E-06 | 4.85E-05 | 2871   | 5253   | 2997  | 8591   | 11186  | 5793   |
| Solyc05g006980.2.1   | -2.0189  | 3.771089 | 0.000231 | 0.001842 | 259    | 436    | 365   | 280    | 1893   | 550    |
| Solyc10g054440.1.1   | -2.01863 | 11.04528 | 1.86E-05 | 0.00021  | 50766  | 72054  | 40673 | 151628 | 135906 | 88494  |
| Solyc01g109680.2.1   | -2.01767 | 4.484316 | 0.000401 | 0.002929 | 747    | 561    | 300   | 2231   | 932    | 718    |
| Solyc03g112870.2.1   | -2.01713 | 8.243298 | 7.79E-06 | 9.84E-05 | 5612   | 11446  | 7206  | 12570  | 26576  | 16047  |
| Solyc04g007650.2.1   | -2.01388 | 3.257073 | 0.000205 | 0.00166  | 267    | 337    | 131   | 823    | 531    | 333    |
| Solyc06g072740.1.1   | -2.01225 | 1.915017 | 0.000964 | 0.006142 | 84     | 150    | 66    | 317    | 277    | 96     |
| Solyc05g050120.2.1   | -2.01203 | 12.14567 | 1.93E-05 | 0.000217 | 109401 | 154789 | 87513 | 304806 | 273251 | 216201 |
| Solyc05g006860.2.1   | -2.01203 | 3.006969 | 0.00012  | 0.001055 | 169    | 263    | 192   | 347    | 986    | 247    |
| Solyc12g099100.1.1   | -2.0111  | 7.317909 | 4.98E-06 | 6.70E-05 | 2956   | 6342   | 3629  | 7484   | 13274  | 8141   |
| Solyc01g060240.2.1   | -2.00786 | 4.576066 | 0.000249 | 0.00196  | 906    | 380    | 332   | 1308   | 2062   | 1013   |
| Solyc01g095070.2.1   | -2.00694 | 7.146603 | 3.53E-06 | 4.94E-05 | 2724   | 4866   | 3611  | 8305   | 10581  | 6565   |
| Solyc09g075120.2.1   | -2.00651 | 8.433369 | 6.47E-06 | 8.40E-05 | 5678   | 13310  | 9103  | 21597  | 26013  | 14819  |
| Solyc01g058500.2.1   | -2.00538 | 4.917323 | 1.02E-05 | 0.000125 | 747    | 665    | 803   | 1127   | 2443   | 1813   |
| Solyc06g074550.2.1   | -2.00455 | 2.286671 | 0.000167 | 0.001395 | 87     | 199    | 111   | 287    | 318    | 249    |
| Solyc10g011880.1.1   | -2.00436 | 4.089067 | 0.000343 | 0.002576 | 571    | 336    | 291   | 1585   | 763    | 600    |
| Solyc09g075110.1.1   | -2.00425 | 4.301129 | 2.03E-06 | 3.05E-05 | 279    | 898    | 485   | 1348   | 1405   | 792    |
| Solyc12g005080.1.1   | -2.00277 | 7.924888 | 5.86E-06 | 7.72E-05 | 5082   | 9260   | 5144  | 12520  | 20334  | 11382  |
| Solyc05g006780.2.1   | -2.00171 | 5.642897 | 9.46E-07 | 1.57E-05 | 939    | 2066   | 1086  | 3404   | 3697   | 1941   |
| Solyc10g007290.2.1   | -1.99883 | 4.877171 | 2.26E-06 | 3.35E-05 | 621    | 1001   | 693   | 2267   | 2253   | 877    |
| Solyc03g115410.2.1   | -1.9964  | 4.749524 | 1.71E-06 | 2.64E-05 | 700    | 885    | 494   | 1794   | 2019   | 1055   |
| Solyc06g053700.1.1   | -1.99518 | 3.233948 | 3.32E-05 | 0.00035  | 243    | 329    | 162   | 577    | 678    | 424    |
| Solyc03g116030.2.1   | -1.99494 | 5.731088 | 1.12E-05 | 0.000134 | 1552   | 1566   | 885   | 3395   | 3965   | 2218   |
| Solyc03g093890.2.1   | -1.99467 | 3.289778 | 6.99E-05 | 0.000666 | 232    | 409    | 151   | 375    | 757    | 594    |
| Solyc06g009020.2.1   | -1.9942  | 9.20673  | 1.08E-05 | 0.00013  | 13606  | 20786  | 12264 | 38751  | 41676  | 25309  |
| Solyc06g066050.2.1   | -1.99396 | 5.223279 | 4.64E-06 | 6.28E-05 | 946    | 1184   | 751   | 2937   | 2123   | 1496   |
| Solyc08g078510.2.1   | -1.99363 | 5.645542 | 1.53E-05 | 0.000177 | 1021   | 2684   | 613   | 2679   | 4028   | 2345   |
| Solyc09g015530.2.1   | -1.99121 | 5.575731 | 5.81E-07 | 1.02E-05 | 861    | 1864   | 1169  | 2445   | 4270   | 2069   |
| Solyc01g007020.2.1   | -1.98892 | 5.319579 | 9.56E-05 | 0.000869 | 700    | 2544   | 381   | 1876   | 3907   | 1678   |
| RRNA_11_4            | -1.98865 | 6.880824 | 4.74E-05 | 0.000476 | 2941   | 2681   | 3122  | 4655   | 8553   | 7396   |
| Solyc02g065540.1.1   | -1.98857 | 4.586604 | 6.20E-06 | 8.11E-05 | 556    | 908    | 459   | 1975   | 1472   | 827    |
| Solyc02g062460.2.1   | -1.98812 | 3.646852 | 1.82E-05 | 0.000206 | 157    | 596    | 324   | 625    | 1246   | 482    |
| Solyc09g015820.2.1   | -1.9873  | 6.560161 | 2.87E-06 | 4.12E-05 | 1733   | 3624   | 2334  | 5680   | 6989   | 4248   |
| Solyc10g011740.2.1   | -1.98715 | 5.594069 | 1.63E-06 | 2.52E-05 | 730    | 2301   | 1104  | 3007   | 3958   | 1872   |
| Solyc10g054320.1.1   | -1.98688 | 5.823956 | 4.62E-06 | 6.27E-05 | 1337   | 2017   | 1135  | 4007   | 4235   | 2039   |
| Solyc02g078400.2.1   | -1.98651 | 8.196619 | 0.000676 | 0.004562 | 5364   | 13383  | 5953  | 4431   | 29021  | 19763  |
| Solyc02g088520.2.1   | -1.98644 | 3.711799 | 7.51E-06 | 9.54E-05 | 281    | 478    | 289   | 975    | 908    | 471    |
| Solyc09g098310.2.1   | -1.98639 | 7.08776  | 4.31E-06 | 5.89E-05 | 2374   | 5559   | 3311  | 7593   | 11014  | 6064   |
| Solyc01g059980.2.1   | -1.98606 | 4.394663 | 2.53E-06 | 3.69E-05 | 332    | 679    | 669   | 1351   | 1295   | 1027   |
| Solyc08g082310.2.1   | -1.98445 | 4.187569 | 1.55E-06 | 2.42E-05 | 285    | 711    | 505   | 962    | 1249   | 985    |
| Solyc07g032230.2.1   | -1.98344 | 7.067931 | 4.82E-06 | 6.51E-05 | 2602   | 5541   | 2922  | 7900   | 11158  | 5469   |
| Solyc11g072550.1.1   | -1.9834  | 6.639204 | 4.37E-06 | 5.95E-05 | 1774   | 3965   | 2464  | 6581   | 7531   | 3121   |
| Solyc06g005500.2.1   | -1.98301 | 8.160285 | 8.93E-06 | 0.000111 | 6477   | 10496  | 5926  | 18800  | 20696  | 11860  |
| Solyc03g070380.2.1   | -1.98147 | 1.327994 | 0.001453 | 0.008719 | 67     | 81     | 45    | 151    | 190    | 107    |
| Solyc07g049180.2.1   | -1.98081 | 7.881589 | 1.79E-05 | 0.000203 | 5927   | 8806   | 4079  | 14781  | 18654  | 9428   |
| Solyc07g063620.2.1   | -1.97909 | 3.260035 | 7.52E-05 | 0.000709 | 269    | 222    | 217   | 582    | 811    | 363    |
| Solyc03g007220.2.1   | -1.97898 | 4.750677 | 4.25E-05 | 0.000434 | 638    | 1193   | 394   | 2394   | 1293   | 981    |
| Solyc08g063010.2.1   | -1.97855 | 2.806175 | 0.000114 | 0.001016 | 137    | 242    | 180   | 548    | 413    | 268    |
| Solyc02g067530.2.1   | -1.97747 | 4.75727  | 7.03E-07 | 1.21E-05 | 437    | 1276   | 600   | 1407   | 2311   | 1212   |
| Solyc03g097830.2.1   | -1.97705 | 5.612812 | 1.32E-06 | 2.11E-05 | 746    | 2148   | 1247  | 2517   | 4314   | 2142   |
| Solyc10g009180.2.1   | -1.97653 | 6.96127  | 9.88E-06 | 0.000121 | 3003   | 4806   | 2238  | 8097   | 9276   | 5072   |
| Solyc06g009110.2.1   | -1.97603 | 5.491275 | 5.60E-07 | 9.92E-06 | 781    | 1910   | 1071  | 2440   | 3642   | 2052   |
| Solyc03g114890.2.1   | -1.97554 | 3.591398 | 1.35E-05 | 0.000159 | 187    | 588    | 264   | 534    | 942    | 665    |
| Solyc06g082080.2.1   | -1.97461 | 4.39255  | 1.11E-05 | 0.000133 | 513    | 957    | 275   | 1189   | 1901   | 799    |
| Solyc07g008280.2.1   | -1.97414 | 4.764275 | 1.14E-06 | 1.85E-05 | 633    | 897    | 613   | 1217   | 2039   | 1540   |
| Solyc08g005200.2.1   | -1.9738  | 4.814493 | 5.72E-07 | 1.01E-05 | 598    | 901    | 724   | 1853   | 1998   | 1177   |
| Solyc12g013690.1.1   | -1.97037 | 7.278191 | 0.000125 | 0.001096 | 5083   | 4600   | 2046  | 9959   | 10714  | 6890   |
| Solyc05g051200.1.1   | -1.96965 | 6.586277 | 0.001026 | 0.006477 | 3600   | 2519   | 916   | 8336   | 4754   | 3581   |
| Solyc10g080900.1.1   | -1.96897 | 4.756712 | 2.51E-05 | 0.000272 | 728    | 798    | 554   | 1271   | 3273   | 759    |
| Solyc02g089290.2.1   | -1.96753 | 5.775341 | 3.09E-06 | 4.40E-05 | 1109   | 2195   | 1211  | 3835   | 3630   | 2252   |
| Solyc04g076830.2.1   | -1.9654  | 7.505347 | 1.10E-05 | 0.000132 | 4399   | 6015   | 3952  | 9760   | 15507  | 7878   |
| Solyc10g074930.1.1   | -1.96525 | 7.149807 | 2.14E-05 | 0.000236 | 3611   | 5163   | 2581  | 6354   | 14132  | 6030   |
| RRNA_SL2.40sc06396_1 | -1.96517 | 7.750314 | 6.90E-05 | 0.000658 | 5498   | 4960   | 5713  | 8896   | 15332  | 13270  |
| Solyc07g064800.2.1   | -1.96204 | 7.475467 | 1.74E-05 | 0.000199 | 2619   | 8081   | 4595  | 7914   | 15356  | 8949   |
| Solyc10g012080.2.1   | -1.96139 | 6.783551 | 1.31E-05 | 0.000154 | 2529   | 4449   | 2074  | 7768   | 8053   | 4041   |
| Solyc09g014280.1.1   | -1.96106 | 8.150857 | 9.90E-05 | 0.000897 | 6299   | 10300  | 6387  | 25642  | 12627  | 10580  |
| Solyc04g071030.1.1   | -1.95577 | 7.197581 | 4.92E-05 | 0.000492 | 3198   | 7498   | 2010  | 8551   | 12965  | 5542   |
| Solyc06g071060.1.1   | -1.95319 | 5.09709  | 3.54E-05 | 0.000371 | 1142   | 969    | 477   | 2196   | 2309   | 1536   |
| Solyc03g007900.2.1   | -1.95281 | 5.555341 | 5.06E-06 | 6.78E-05 | 1289   | 1700   | 768   | 2546   | 3710   | 2184   |
| RRNA_6_1             | -1.95259 | 7.996325 | 7.81E-05 | 0.000731 | 6660   | 5960   | 6682  | 10884  | 17006  | 16084  |
| Solyc07g043250.1.1   | -1.95242 | 7.014435 | 9.51E-06 | 0.000117 | 2832   | 5349   | 2568  | 8405   | 8613   | 5784   |
| Solyc10g049630.1.1   | -1.95237 | 5.315171 | 2.76E-06 | 3.97E-05 | 919    | 1817   | 623   | 2462   | 3096   | 1625   |
| Solyc03g118390.2.1   | -1.95185 | 7.003614 | 6.88E-06 | 8.82E-05 | 2900   | 4735   | 2807  | 6536   | 11303  | 5617   |
| Solyc07g005440.1.1   | -1.95003 | 9.127692 | 2.08E-05 | 0.000231 | 14235  | 20607  | 10330 | 32739  | 43310  | 24468  |
| Solyc04g078640.1.1   | -1.94897 | 5.609613 | 6.74E-05 | 0.000645 | 1636   | 1474   | 622   | 3193   | 3461   | 2043   |
| Solyc03g083470.2.1   | -1.94877 | 5.5994   | 0.000867 | 0.005632 | 1689   | 1846   | 294   | 3544   | 3083   | 1929   |
| Solyc09g009390.2.1   | -1.94842 | 9.265759 | 3.54E-05 | 0.000371 | 12764  | 21746  | 15596 | 48636  | 35974  | 23397  |
| Solyc02g067470.2.1   | -1.94724 | 3.931538 | 6.81E-06 | 8.76E-05 | 248    | 678    | 381   | 688    | 1548   | 618    |
| Solyc08g080900.2.1   | -1.94421 | 7.569122 | 4.42E-05 | 0.000448 | 5622   | 5966   | 3228  | 10782  | 15117  | 8314   |

|                      |          |          |          |          |       |       |       |       |       |       |
|----------------------|----------|----------|----------|----------|-------|-------|-------|-------|-------|-------|
| Solyc04g010310.2.1   | -1.94248 | 7.466567 | 1.36E-05 | 0.000159 | 3714  | 7415  | 3722  | 11852 | 12271 | 7310  |
| Solyc11g005380.1.1   | -1.94182 | 8.143361 | 1.60E-05 | 0.000184 | 7135  | 9991  | 5660  | 15244 | 24492 | 11879 |
| Solyc06g069780.2.1   | -1.94117 | 5.639814 | 9.23E-06 | 0.000114 | 1453  | 1514  | 915   | 2618  | 3638  | 2542  |
| Solyc07g005130.2.1   | -1.9402  | 5.933837 | 1.17E-05 | 0.000139 | 1739  | 1883  | 1160  | 3422  | 4743  | 2780  |
| Solyc01g103030.2.1   | -1.93959 | 5.448347 | 7.72E-07 | 1.31E-05 | 820   | 1616  | 1179  | 2208  | 3707  | 1992  |
| Solyc07g008940.2.1   | -1.93919 | 6.625446 | 6.58E-06 | 8.52E-05 | 1670  | 4383  | 2434  | 5589  | 8266  | 4090  |
| Solyc04g007580.1.1   | -1.93705 | 6.191287 | 0.000186 | 0.00153  | 1593  | 4206  | 752   | 2945  | 7016  | 3474  |
| Solyc06g035610.2.1   | -1.93694 | 2.21215  | 0.00077  | 0.005094 | 134   | 176   | 63    | 268   | 370   | 194   |
| Solyc05g006640.2.1   | -1.93682 | 6.7004   | 7.35E-06 | 9.37E-05 | 2313  | 3968  | 2301  | 5687  | 9255  | 4149  |
| Solyc06g073840.2.1   | -1.93525 | 7.366881 | 4.10E-05 | 0.000421 | 4743  | 5358  | 2934  | 9932  | 13899 | 6302  |
| Solyc11g012780.1.1   | -1.93331 | 4.9918   | 7.61E-07 | 1.30E-05 | 762   | 1150  | 681   | 1949  | 2452  | 1314  |
| Solyc09g075750.1.1   | -1.93249 | 4.885214 | 1.91E-05 | 0.000215 | 882   | 1044  | 433   | 2076  | 2179  | 1060  |
| Solyc02g082350.2.1   | -1.9295  | 6.359294 | 3.42E-05 | 0.00036  | 2189  | 2939  | 1514  | 6339  | 4932  | 3130  |
| Solyc01g005920.2.1   | -1.92904 | 4.786472 | 3.55E-05 | 0.000371 | 865   | 718   | 521   | 2081  | 1991  | 897   |
| Solyc08g060970.2.1   | -1.92746 | 5.753399 | 7.80E-06 | 9.85E-05 | 738   | 2560  | 1465  | 3100  | 4292  | 2313  |
| Solyc01g010020.2.1   | -1.927   | 4.150376 | 5.09E-06 | 6.81E-05 | 397   | 821   | 304   | 891   | 1374  | 887   |
| Solyc01g099520.2.1   | -1.92697 | 6.184995 | 9.36E-06 | 0.000115 | 1024  | 3390  | 1983  | 3861  | 5966  | 3278  |
| Solyc06g073190.2.1   | -1.92673 | 7.85468  | 2.54E-05 | 0.000275 | 5533  | 8379  | 5030  | 15700 | 13855 | 10616 |
| Solyc01g04058110.2.1 | -1.92293 | 4.514052 | 3.19E-05 | 0.000339 | 266   | 1281  | 515   | 863   | 2111  | 1173  |
| Solyc11g008370.1.1   | -1.91957 | 3.794382 | 1.01E-05 | 0.000123 | 197   | 618   | 396   | 838   | 1106  | 556   |
| Solyc04g007870.2.1   | -1.91837 | 6.575414 | 7.26E-06 | 9.27E-05 | 2225  | 3513  | 2133  | 5468  | 7726  | 4004  |
| Solyc08g023470.2.1   | -1.91777 | 6.772711 | 7.83E-06 | 9.87E-05 | 2489  | 4220  | 2403  | 6192  | 8822  | 4674  |
| Solyc06g074940.2.1   | -1.91755 | 4.913737 | 0.000359 | 0.002665 | 263   | 1745  | 814   | 848   | 3755  | 1220  |
| Solyc03g120140.2.1   | -1.91748 | 5.359327 | 8.72E-07 | 1.46E-05 | 897   | 1534  | 980   | 2439  | 3390  | 1614  |
| Solyc02g090820.2.1   | -1.91647 | 6.690054 | 0.00011  | 0.000978 | 997   | 4953  | 3335  | 4598  | 8387  | 5396  |
| Solyc10g080560.1.1   | -1.91631 | 1.59004  | 0.000871 | 0.005653 | 58    | 115   | 78    | 181   | 220   | 130   |
| Solyc10g086680.1.1   | -1.91598 | 5.082375 | 8.66E-05 | 0.0008   | 467   | 714   | 1501  | 1894  | 2985  | 1319  |
| Solyc08g078090.1.1   | -1.91505 | 5.956181 | 8.24E-05 | 0.000767 | 590   | 2963  | 2029  | 2703  | 5335  | 3123  |
| Solyc09g082230.1.1   | -1.91493 | 5.495037 | 0.000142 | 0.001219 | 1568  | 1497  | 480   | 2561  | 3703  | 1880  |
| Solyc12g087960.1.1   | -1.9149  | 4.061465 | 0.000147 | 0.001255 | 578   | 373   | 296   | 1231  | 1048  | 650   |
| Solyc03g083150.2.1   | -1.91477 | 4.313855 | 8.33E-06 | 0.000104 | 505   | 751   | 384   | 801   | 1917  | 930   |
| Solyc06g009270.2.1   | -1.91311 | 6.957115 | 9.02E-06 | 0.000112 | 2532  | 4996  | 2994  | 7968  | 8375  | 5496  |
| Solyc07g045160.2.1   | -1.91097 | 6.044904 | 8.93E-06 | 0.000111 | 1262  | 3356  | 1252  | 3675  | 5236  | 2917  |
| Solyc07g043560.2.1   | -1.90917 | 7.451986 | 4.28E-05 | 0.000437 | 2604  | 7146  | 5376  | 12604 | 10662 | 7272  |
| Solyc07g064610.2.1   | -1.90882 | 7.227597 | 1.27E-05 | 0.000151 | 3372  | 5267  | 3728  | 9211  | 11653 | 6046  |
| Solyc09g059430.2.1   | -1.90832 | 6.704573 | 1.58E-05 | 0.000182 | 2289  | 4603  | 2070  | 4627  | 9400  | 4911  |
| Solyc09g008840.2.1   | -1.9083  | 2.903532 | 9.10E-05 | 0.000834 | 147   | 272   | 205   | 524   | 508   | 289   |
| Solyc04g079300.2.1   | -1.90799 | 7.071744 | 1.56E-05 | 0.00018  | 2132  | 6248  | 3491  | 8241  | 10459 | 5447  |
| Solyc11g066970.1.1   | -1.90702 | 2.368655 | 0.001648 | 0.009661 | 46    | 165   | 224   | 260   | 432   | 234   |
| Solyc01g091840.2.1   | -1.90678 | 5.527201 | 2.46E-06 | 3.60E-05 | 915   | 2167  | 953   | 2209  | 3991  | 2131  |
| Solyc12g017430.1.1   | -1.90646 | 2.312037 | 0.000414 | 0.00301  | 127   | 172   | 105   | 295   | 314   | 247   |
| Solyc11g061760.1.1   | -1.90541 | 3.993279 | 5.51E-06 | 7.31E-05 | 398   | 511   | 379   | 1009  | 1125  | 679   |
| Solyc02g078820.2.1   | -1.90309 | 5.807429 | 1.02E-05 | 0.000125 | 1404  | 2120  | 1130  | 3879  | 3823  | 2202  |
| Solyc01g068450.2.1   | -1.90119 | 4.883922 | 6.79E-07 | 1.17E-05 | 608   | 1213  | 700   | 1664  | 2359  | 1270  |
| Solyc02g077470.2.1   | -1.89532 | 5.363339 | 0.000126 | 0.001099 | 1188  | 1342  | 788   | 3830  | 1884  | 1350  |
| Solyc05g013750.2.1   | -1.89127 | 8.088897 | 2.17E-05 | 0.000239 | 6662  | 11041 | 5369  | 14714 | 21450 | 12374 |
| Solyc09g091840.2.1   | -1.89123 | 8.989041 | 2.19E-05 | 0.000241 | 9623  | 19430 | 14254 | 24153 | 42131 | 24574 |
| Solyc12g005640.1.1   | -1.89076 | 5.71629  | 3.43E-06 | 4.82E-05 | 1219  | 1818  | 1320  | 2536  | 4205  | 2598  |
| Solyc11g017380.1.1   | -1.88986 | 3.008054 | 0.000152 | 0.00129  | 206   | 312   | 155   | 575   | 571   | 284   |
| Solyc03g007040.2.1   | -1.88883 | 5.908848 | 1.06E-05 | 0.000128 | 1605  | 2062  | 1261  | 3300  | 5206  | 2408  |
| Solyc12g005140.1.1   | -1.88873 | 5.158372 | 1.27E-05 | 0.000151 | 1011  | 1330  | 612   | 2536  | 2524  | 1292  |
| Solyc05g009340.1.1   | -1.88848 | 2.759621 | 0.000354 | 0.002635 | 98    | 352   | 166   | 462   | 578   | 200   |
| Solyc06g036430.2.1   | -1.88788 | 2.312915 | 0.000353 | 0.002634 | 115   | 167   | 127   | 251   | 404   | 229   |
| Solyc03g025380.2.1   | -1.88679 | 3.774778 | 0.000278 | 0.002157 | 418   | 486   | 212   | 1098  | 1089  | 319   |
| Solyc06g005490.2.1   | -1.88509 | 4.869137 | 1.25E-06 | 2.01E-05 | 674   | 1055  | 716   | 1699  | 1995  | 1402  |
| Solyc09g089670.2.1   | -1.88475 | 6.737998 | 1.12E-05 | 0.000134 | 2278  | 3836  | 2860  | 6561  | 7538  | 4694  |
| Solyc02g071740.2.1   | -1.88469 | 6.656205 | 6.24E-05 | 0.000604 | 2272  | 5143  | 1587  | 7110  | 6140  | 4262  |
| Solyc02g080070.2.1   | -1.88468 | 8.562688 | 8.74E-05 | 0.000805 | 11009 | 14468 | 5933  | 18301 | 32900 | 17074 |
| Solyc01g096730.2.1   | -1.88233 | 6.920027 | 5.23E-05 | 0.000519 | 3524  | 3772  | 2462  | 5604  | 11649 | 5026  |
| Solyc01g098580.2.1   | -1.88197 | 3.156009 | 0.000473 | 0.003372 | 285   | 297   | 136   | 684   | 480   | 364   |
| Solyc06g063090.2.1   | -1.88082 | 6.815312 | 6.50E-05 | 0.000625 | 1364  | 5493  | 3403  | 5012  | 10456 | 5052  |
| Solyc09g074050.2.1   | -1.87994 | 7.722932 | 7.21E-05 | 0.000685 | 3233  | 11909 | 4537  | 9175  | 19462 | 9750  |
| Solyc12g009180.1.1   | -1.87912 | 6.492095 | 7.65E-06 | 9.69E-05 | 1797  | 3502  | 2416  | 5092  | 6754  | 4077  |
| Solyc02g080040.2.1   | -1.87911 | 3.142279 | 0.000594 | 0.004079 | 131   | 546   | 161   | 302   | 1026  | 347   |
| Solyc06g066370.2.1   | -1.87845 | 9.293667 | 5.49E-05 | 0.000541 | 14671 | 30104 | 10598 | 35014 | 52827 | 25516 |
| Solyc02g093050.2.1   | -1.87745 | 7.696446 | 4.52E-05 | 0.000457 | 5471  | 8321  | 3776  | 10091 | 18648 | 8946  |
| Solyc06g063180.1.1   | -1.8748  | 6.379908 | 5.71E-05 | 0.00056  | 2395  | 3412  | 1233  | 5140  | 5865  | 3637  |
| Solyc09g090250.2.1   | -1.87416 | 5.651651 | 2.93E-06 | 4.19E-05 | 1007  | 2176  | 1214  | 3060  | 4056  | 1930  |
| Solyc09g090440.1.1   | -1.874   | 4.471624 | 3.36E-05 | 0.000355 | 695   | 733   | 370   | 1541  | 1445  | 894   |
| Solyc05g006560.1.1   | -1.87342 | 5.269748 | 2.41E-06 | 3.53E-05 | 684   | 1822  | 945   | 2532  | 2671  | 1586  |
| Solyc01g104690.2.1   | -1.87065 | 7.484575 | 0.000792 | 0.005222 | 6700  | 4537  | 2547  | 13268 | 8848  | 8184  |
| Solyc04g039960.2.1   | -1.86943 | 4.056708 | 0.000106 | 0.000951 | 187   | 857   | 497   | 1078  | 781   | 908   |
| Solyc12g043120.1.1   | -1.8688  | 8.230146 | 3.31E-05 | 0.000349 | 4862  | 14444 | 7839  | 19256 | 21832 | 12102 |
| Solyc11g010450.1.1   | -1.86862 | 3.73594  | 1.51E-05 | 0.000175 | 233   | 525   | 398   | 587   | 1108  | 671   |
| Solyc02g072080.1.1   | -1.86591 | 7.138491 | 0.000158 | 0.001328 | 3682  | 7060  | 1778  | 7841  | 12556 | 5304  |
| Solyc11g013880.1.1   | -1.86407 | 6.396742 | 1.13E-05 | 0.000135 | 1633  | 3920  | 1966  | 4838  | 7042  | 3316  |
| Solyc12g006500.1.1   | -1.864   | 5.593016 | 5.91E-06 | 7.77E-05 | 1019  | 1794  | 1310  | 2075  | 4843  | 1997  |
| Solyc08g016610.1.1   | -1.86399 | 1.803184 | 0.001458 | 0.008744 | 46    | 140   | 120   | 188   | 302   | 138   |
| Solyc02g063020.1.1   | -1.86195 | 4.491854 | 6.97E-06 | 8.93E-05 | 589   | 945   | 401   | 1137  | 1820  | 1043  |
| Solyc06g082290.2.1   | -1.86084 | 5.175353 | 4.24E-06 | 5.80E-05 | 589   | 1702  | 971   | 1639  | 3483  | 1505  |
| Solyc06g005170.2.1   | -1.85942 | 7.864177 | 0.000159 | 0.001337 | 5639  | 11838 | 3459  | 17074 | 15833 | 8250  |
| Solyc12g005290.1.1   | -1.85925 | 4.368273 | 1.17E-05 | 0.000139 | 376   | 1014  | 480   | 1547  | 1343  | 736   |
| Solyc03g098650.2.1   | -1.85916 | 1.695844 | 0.001309 | 0.007962 | 79    | 129   | 68    | 208   | 207   | 143   |
| Solyc02g064680.2.1   | -1.8589  | 7.032054 | 2.68E-05 | 0.000289 | 2490  | 5780  | 3338  | 7065  | 12626 | 4529  |

|                    |          |          |          |          |       |       |       |       |       |       |
|--------------------|----------|----------|----------|----------|-------|-------|-------|-------|-------|-------|
| Solyc11g018610.1.1 | -1.85875 | 5.48242  | 1.05E-05 | 0.000127 | 971   | 1894  | 1041  | 3454  | 2932  | 1496  |
| Solyc01g007010.2.1 | -1.85859 | 5.004246 | 7.62E-05 | 0.000716 | 707   | 1942  | 363   | 1677  | 2699  | 1383  |
| Solyc10g050060.1.1 | -1.85834 | 6.610898 | 0.000196 | 0.001603 | 3072  | 3207  | 1699  | 7867  | 5654  | 3454  |
| Solyc09g075480.2.1 | -1.85766 | 3.290082 | 0.000213 | 0.001718 | 279   | 209   | 276   | 492   | 776   | 461   |
| Solyc05g013060.2.1 | -1.85756 | 5.434098 | 8.19E-05 | 0.000763 | 1508  | 1222  | 693   | 2017  | 3972  | 1865  |
| Solyc01g107820.2.1 | -1.85533 | 9.69436  | 0.000929 | 0.00597  | 30409 | 28783 | 8081  | 52809 | 60372 | 33355 |
| Solyc06g009140.2.1 | -1.85492 | 9.960668 | 3.77E-05 | 0.000392 | 21381 | 44820 | 22077 | 48826 | 88655 | 42793 |
| Solyc02g090350.2.1 | -1.85423 | 6.68413  | 0.000246 | 0.001946 | 2225  | 4032  | 2634  | 9765  | 5286  | 2797  |
| Solyc09g011670.2.1 | -1.85376 | 7.930749 | 7.22E-05 | 0.000686 | 4474  | 8748  | 7778  | 18243 | 14105 | 9748  |
| Solyc04g074430.1.1 | -1.85323 | 3.962246 | 0.000491 | 0.003472 | 534   | 603   | 160   | 1067  | 1295  | 471   |
| Solyc04g012040.2.1 | -1.85301 | 5.013347 | 0.001241 | 0.007613 | 983   | 974   | 662   | 3583  | 1033  | 818   |
| Solyc01g007780.2.1 | -1.85246 | 3.038886 | 0.000201 | 0.001636 | 149   | 289   | 266   | 399   | 487   | 494   |
| Solyc09g059510.2.1 | -1.85246 | 6.029545 | 6.49E-05 | 0.000625 | 1883  | 2542  | 1108  | 4599  | 3696  | 2884  |
| Solyc02g020890.2.1 | -1.85124 | 4.711583 | 2.23E-06 | 3.31E-05 | 515   | 1245  | 598   | 1541  | 2016  | 1093  |
| Solyc11g066320.1.1 | -1.84824 | 4.298057 | 9.39E-05 | 0.000856 | 663   | 608   | 318   | 1375  | 1338  | 742   |
| Solyc01g103220.2.1 | -1.84724 | 7.915827 | 4.37E-05 | 0.000444 | 4440  | 9940  | 6933  | 9959  | 20239 | 12577 |
| Solyc03g063680.1.1 | -1.84308 | 2.418097 | 0.000535 | 0.003735 | 78    | 282   | 137   | 293   | 370   | 261   |
| Solyc09g083100.1.1 | -1.84175 | 3.269425 | 5.41E-05 | 0.000535 | 214   | 396   | 232   | 444   | 779   | 477   |
| Solyc12g042480.1.1 | -1.84109 | 7.9662   | 3.49E-05 | 0.000366 | 5007  | 12071 | 5605  | 11737 | 19316 | 12783 |
| Solyc12g100010.1.1 | -1.84037 | 5.311161 | 4.34E-06 | 5.91E-05 | 897   | 1870  | 792   | 2578  | 2801  | 1598  |
| Solyc09g089680.2.1 | -1.84011 | 4.544001 | 0.001578 | 0.009331 | 906   | 769   | 206   | 2034  | 1228  | 756   |
| Solyc05g050800.2.1 | -1.83489 | 6.852728 | 7.47E-05 | 0.000705 | 2842  | 5391  | 2085  | 8491  | 7347  | 4309  |
| Solyc05g005260.1.1 | -1.83471 | 8.06457  | 5.13E-05 | 0.00051  | 5379  | 14248 | 5206  | 16074 | 19835 | 11282 |
| Solyc06g076100.2.1 | -1.83367 | 6.534784 | 1.65E-05 | 0.000189 | 2018  | 4090  | 2151  | 5723  | 6916  | 3749  |
| Solyc06g061150.2.1 | -1.83051 | 6.914955 | 1.97E-05 | 0.000221 | 2780  | 4653  | 3053  | 6696  | 10127 | 4834  |
| Solyc11g070110.1.1 | -1.83028 | 4.522013 | 4.18E-06 | 5.74E-05 | 418   | 1076  | 596   | 1238  | 2012  | 899   |
| Solyc01g007220.2.1 | -1.82907 | 7.311696 | 6.05E-05 | 0.000589 | 2506  | 8173  | 4156  | 10664 | 11093 | 6151  |
| Solyc03g119340.2.1 | -1.82821 | 3.555081 | 0.000389 | 0.002861 | 121   | 637   | 364   | 401   | 1061  | 629   |
| Solyc03g007530.2.1 | -1.82696 | 8.289096 | 8.52E-05 | 0.000788 | 4499  | 14049 | 10054 | 13729 | 28348 | 14255 |
| Solyc01g111970.2.1 | -1.82658 | 2.242846 | 0.000842 | 0.005488 | 110   | 138   | 146   | 299   | 349   | 184   |
| Solyc11g069550.1.1 | -1.82646 | 4.451012 | 4.65E-06 | 6.29E-05 | 407   | 908   | 634   | 1271  | 1892  | 792   |
| Solyc09g064780.2.1 | -1.82602 | 6.373247 | 3.46E-05 | 0.000363 | 2280  | 3400  | 1524  | 4696  | 6607  | 3436  |
| Solyc01g105230.2.1 | -1.82586 | 6.080162 | 4.36E-05 | 0.000443 | 2008  | 2277  | 1379  | 4268  | 5276  | 2516  |
| Solyc12g056210.1.1 | -1.8253  | 6.956897 | 0.000106 | 0.000949 | 3536  | 4293  | 2652  | 9524  | 7430  | 4554  |
| Solyc04g014820.2.1 | -1.82424 | 5.411982 | 1.51E-05 | 0.000175 | 1261  | 1517  | 820   | 2698  | 3214  | 1632  |
| Solyc01g014230.2.1 | -1.82355 | 5.99868  | 2.21E-05 | 0.000243 | 1551  | 2370  | 1600  | 4533  | 4283  | 2375  |
| Solyc12g010570.1.1 | -1.82252 | 6.177526 | 8.97E-05 | 0.000822 | 2209  | 2962  | 1075  | 4181  | 5483  | 3094  |
| Solyc12g007110.1.1 | -1.82208 | 7.621195 | 6.75E-05 | 0.000645 | 5675  | 6817  | 4134  | 11861 | 14814 | 8081  |
| Solyc12g008970.1.1 | -1.82196 | 6.915266 | 5.85E-05 | 0.000572 | 3480  | 4382  | 2404  | 7688  | 8736  | 4813  |
| Solyc08g080520.2.1 | -1.82173 | 5.145008 | 3.92E-06 | 5.41E-05 | 636   | 1707  | 910   | 1677  | 3227  | 1493  |
| Solyc04g007660.1.1 | -1.82109 | 4.818028 | 1.20E-05 | 0.000143 | 746   | 1068  | 617   | 2069  | 1701  | 1097  |
| Solyc10g084690.1.1 | -1.8184  | 3.191048 | 0.000542 | 0.003774 | 223   | 365   | 210   | 814   | 547   | 237   |
| Solyc11g072660.1.1 | -1.81456 | 4.92982  | 9.38E-06 | 0.000116 | 809   | 1287  | 587   | 1437  | 2892  | 1222  |
| Solyc11g072830.1.1 | -1.81399 | 2.499145 | 0.001291 | 0.007873 | 166   | 179   | 126   | 440   | 263   | 241   |
| Solyc03g121610.2.1 | -1.81355 | 3.160361 | 0.000601 | 0.004121 | 120   | 360   | 327   | 413   | 459   | 589   |
| Solyc06g050440.2.1 | -1.81124 | 3.433007 | 0.000181 | 0.001493 | 143   | 644   | 265   | 506   | 997   | 449   |
| Solyc04g073960.2.1 | -1.80895 | 2.54265  | 0.001527 | 0.009089 | 187   | 221   | 88    | 207   | 582   | 268   |
| Solyc09g092480.1.1 | -1.80754 | 4.455417 | 0.000244 | 0.00193  | 358   | 1316  | 457   | 552   | 2247  | 1173  |
| Solyc09g090730.1.1 | -1.80434 | 7.456136 | 0.000106 | 0.000952 | 2473  | 10053 | 4498  | 9016  | 13557 | 8217  |
| Solyc06g072310.2.1 | -1.80372 | 2.697806 | 0.001058 | 0.006638 | 186   | 307   | 88    | 457   | 410   | 252   |
| Solyc07g066570.2.1 | -1.80211 | 4.615902 | 4.75E-06 | 6.42E-05 | 565   | 1115  | 540   | 1432  | 1911  | 992   |
| Solyc01g065530.2.1 | -1.8021  | 5.694588 | 9.96E-05 | 0.0009   | 1110  | 3057  | 799   | 2663  | 5173  | 1736  |
| Solyc02g071350.2.1 | -1.80142 | 3.852816 | 4.76E-05 | 0.000478 | 356   | 662   | 286   | 772   | 1411  | 476   |
| Solyc01g106310.2.1 | -1.79909 | 3.268233 | 0.000121 | 0.001067 | 183   | 435   | 262   | 619   | 531   | 469   |
| Solyc04g078680.2.1 | -1.79691 | 7.254947 | 3.44E-05 | 0.000362 | 3589  | 6271  | 3754  | 9056  | 11559 | 6270  |
| Solyc05g005250.2.1 | -1.79492 | 6.238067 | 2.14E-05 | 0.000236 | 1762  | 3077  | 1889  | 4820  | 5650  | 2849  |
| Solyc09g047910.2.1 | -1.79376 | 4.36821  | 5.28E-05 | 0.000523 | 660   | 700   | 387   | 1374  | 1501  | 757   |
| Solyc01g111620.2.1 | -1.79355 | 5.133688 | 4.90E-06 | 6.60E-05 | 706   | 1633  | 891   | 1537  | 2691  | 1860  |
| Solyc09g074970.2.1 | -1.79254 | 2.951908 | 0.000181 | 0.001496 | 177   | 362   | 167   | 370   | 658   | 344   |
| Solyc12g038550.1.1 | -1.79118 | 3.582563 | 9.55E-05 | 0.000868 | 337   | 462   | 246   | 844   | 810   | 434   |
| Solyc09g007130.2.1 | -1.78997 | 5.919846 | 0.000467 | 0.003335 | 2108  | 1912  | 1021  | 4959  | 3017  | 2264  |
| Solyc03g034180.2.1 | -1.78869 | 7.090225 | 7.50E-05 | 0.000707 | 3701  | 5670  | 2730  | 8683  | 10630 | 4894  |
| Solyc02g084710.2.1 | -1.78828 | 4.32624  | 0.000398 | 0.002914 | 622   | 589   | 462   | 1849  | 952   | 607   |
| Solyc12g055930.1.1 | -1.78821 | 4.570056 | 6.73E-06 | 8.68E-05 | 460   | 1082  | 644   | 1507  | 1809  | 881   |
| Solyc01g080220.2.1 | -1.78816 | 7.864953 | 6.33E-05 | 0.000612 | 4668  | 10845 | 6011  | 9923  | 18818 | 12024 |
| Solyc01g088530.2.1 | -1.78705 | 3.539921 | 6.56E-05 | 0.00063  | 200   | 584   | 311   | 497   | 1027  | 544   |
| Solyc10g081440.1.1 | -1.78586 | 7.982832 | 7.92E-05 | 0.000741 | 4262  | 10702 | 8223  | 16713 | 16893 | 10235 |
| Solyc05g014340.2.1 | -1.7844  | 6.140987 | 3.32E-05 | 0.00035  | 1923  | 2628  | 1615  | 4274  | 5635  | 2633  |
| Solyc10g084940.1.1 | -1.78367 | 5.250302 | 2.72E-05 | 0.000293 | 1148  | 1136  | 914   | 1958  | 3565  | 1396  |
| Solyc10g080810.1.1 | -1.78363 | 5.443527 | 8.53E-06 | 0.000106 | 1141  | 1665  | 1024  | 2651  | 3511  | 1588  |
| Solyc09g008260.2.1 | -1.7831  | 4.560692 | 5.04E-05 | 0.000502 | 765   | 651   | 535   | 1451  | 1683  | 976   |
| Solyc03g097680.2.1 | -1.78299 | 7.995374 | 3.90E-05 | 0.000403 | 5289  | 11299 | 6779  | 14306 | 19437 | 11002 |
| Solyc02g087000.2.1 | -1.78261 | 6.985393 | 6.70E-05 | 0.000642 | 2472  | 5504  | 3626  | 4996  | 12618 | 5461  |
| Solyc09g011660.2.1 | -1.78149 | 6.019058 | 2.74E-05 | 0.000295 | 1483  | 2208  | 1976  | 4161  | 4237  | 2770  |
| RRNA_3_1           | -1.78145 | 8.766058 | 0.000211 | 0.001706 | 11548 | 13014 | 12454 | 16850 | 30201 | 26622 |
| Solyc02g062930.2.1 | -1.78131 | 5.550717 | 5.43E-06 | 7.22E-05 | 967   | 2035  | 1278  | 2403  | 3817  | 2057  |
| Solyc05g006520.2.1 | -1.78117 | 8.274089 | 4.62E-05 | 0.000466 | 7515  | 11556 | 8256  | 17447 | 23101 | 13537 |
| Solyc04g016180.2.1 | -1.77985 | 7.988998 | 0.000151 | 0.001284 | 7116  | 10365 | 5053  | 18461 | 16144 | 9357  |
| Solyc08g066430.1.1 | -1.77779 | 4.174525 | 7.47E-05 | 0.000705 | 295   | 904   | 513   | 613   | 1353  | 1112  |
| Solyc01g109050.2.1 | -1.77703 | 3.066139 | 0.000211 | 0.001702 | 167   | 320   | 263   | 534   | 669   | 286   |
| Solyc10g074500.1.1 | -1.77654 | 7.574626 | 5.59E-05 | 0.00055  | 4882  | 7657  | 4462  | 11608 | 13762 | 7881  |
| Solyc02g083390.2.1 | -1.77652 | 5.875512 | 0.000101 | 0.000911 | 1833  | 1953  | 1223  | 4190  | 3828  | 2161  |
| Solyc11g065660.1.1 | -1.77594 | 5.689734 | 1.47E-05 | 0.000171 | 1339  | 2023  | 1219  | 3074  | 4234  | 1893  |
| Solyc06g065200.2.1 | -1.77529 | 3.042365 | 0.000167 | 0.001394 | 164   | 364   | 228   | 417   | 719   | 334   |

|                      |          |          |          |          |       |       |       |       |       |       |
|----------------------|----------|----------|----------|----------|-------|-------|-------|-------|-------|-------|
| Solyc12g014080.1.1   | -1.77359 | 5.294747 | 4.78E-06 | 6.46E-05 | 723   | 1805  | 1126  | 2042  | 3265  | 1652  |
| Solyc05g007150.2.1   | -1.77319 | 6.320221 | 5.11E-05 | 0.000508 | 1542  | 2837  | 2743  | 5032  | 4905  | 3660  |
| Solyc01g0066870.2.1  | -1.77202 | 5.983202 | 3.93E-05 | 0.000406 | 1100  | 2784  | 1981  | 2574  | 5381  | 3177  |
| Solyc02g064750.2.1   | -1.77181 | 5.763525 | 8.45E-05 | 0.000783 | 1687  | 2069  | 987   | 3581  | 3736  | 2123  |
| Solyc09g090560.1.1   | -1.77112 | 3.114928 | 0.000175 | 0.00145  | 214   | 338   | 219   | 507   | 733   | 308   |
| Solyc07g043590.2.1   | -1.77013 | 6.831023 | 6.23E-05 | 0.000604 | 2153  | 5672  | 2941  | 4864  | 10789 | 4889  |
| Solyc11g006720.1.1   | -1.76981 | 4.157942 | 6.89E-05 | 0.000657 | 533   | 796   | 277   | 1070  | 1320  | 728   |
| Solyc01g102500.2.1   | -1.76899 | 6.086908 | 1.84E-05 | 0.000208 | 1394  | 3078  | 1820  | 4003  | 4989  | 2861  |
| Solyc01g097280.2.1   | -1.76659 | 4.611893 | 6.12E-05 | 0.000595 | 387   | 1206  | 734   | 881   | 1699  | 1537  |
| Solyc12g042460.1.1   | -1.76633 | 2.524692 | 0.001168 | 0.007249 | 188   | 180   | 118   | 376   | 414   | 213   |
| Solyc06g071620.2.1   | -1.76607 | 4.365505 | 8.37E-05 | 0.000778 | 263   | 976   | 723   | 822   | 1609  | 1128  |
| Solyc11g010780.1.1   | -1.76547 | 4.753831 | 0.000469 | 0.003342 | 1016  | 658   | 512   | 2122  | 1453  | 1002  |
| Solyc03g118340.2.1   | -1.76482 | 7.905252 | 0.000262 | 0.002051 | 4655  | 10461 | 7044  | 7623  | 26620 | 10147 |
| Solyc08g079700.1.1   | -1.76339 | 6.863344 | 0.000473 | 0.003366 | 2722  | 7396  | 1381  | 6372  | 8992  | 5026  |
| Solyc11g044880.1.1   | -1.76148 | 7.074492 | 4.35E-05 | 0.000442 | 3146  | 5664  | 3462  | 8050  | 10531 | 5194  |
| Solyc06g083790.2.1   | -1.76138 | 8.507902 | 5.20E-05 | 0.000517 | 7957  | 16100 | 9514  | 19084 | 28253 | 16307 |
| Solyc01g081470.2.1   | -1.76135 | 4.498476 | 5.34E-05 | 0.000528 | 283   | 1135  | 763   | 1376  | 1499  | 1002  |
| Solyc06g005160.2.1   | -1.76096 | 9.078238 | 0.000124 | 0.001088 | 8081  | 26657 | 17016 | 28232 | 44136 | 23034 |
| Solyc06g035620.2.1   | -1.76077 | 4.556426 | 0.000159 | 0.001337 | 764   | 1046  | 301   | 1317  | 1851  | 968   |
| Solyc06g051750.2.1   | -1.75877 | 5.338155 | 3.18E-05 | 0.000338 | 1255  | 1425  | 833   | 1850  | 3739  | 1680  |
| Solyc01g094040.2.1   | -1.75744 | 6.019685 | 2.78E-05 | 0.000298 | 1562  | 2668  | 1655  | 2822  | 5488  | 3108  |
| Solyc05g012890.1.1   | -1.75715 | 5.649412 | 1.53E-05 | 0.000177 | 1286  | 2242  | 1071  | 2981  | 3794  | 2015  |
| Solyc07g006280.2.1   | -1.75707 | 8.047918 | 0.000241 | 0.001911 | 6041  | 14907 | 4609  | 14925 | 24924 | 8440  |
| Solyc01g067020.2.1   | -1.75549 | 6.492611 | 8.46E-05 | 0.000784 | 1620  | 5372  | 1921  | 4469  | 7465  | 3950  |
| Solyc05g013660.2.1   | -1.75524 | 5.869771 | 6.66E-05 | 0.000638 | 1120  | 3190  | 1353  | 2381  | 5838  | 2415  |
| Solyc11g051200.1.1   | -1.75462 | 5.216096 | 4.60E-05 | 0.000464 | 880   | 1021  | 1294  | 1811  | 2290  | 2113  |
| Solyc10g006310.2.1   | -1.75417 | 4.67295  | 5.90E-06 | 7.77E-05 | 525   | 1051  | 762   | 1477  | 1826  | 1111  |
| Solyc04g050140.2.1   | -1.75096 | 6.205291 | 7.11E-05 | 0.000676 | 2091  | 2902  | 1598  | 4996  | 5094  | 2734  |
| Solyc02g083590.2.1   | -1.74994 | 8.317128 | 0.000143 | 0.001225 | 4667  | 15166 | 10676 | 18853 | 24624 | 12549 |
| Solyc05g056510.2.1   | -1.74477 | 6.581912 | 3.63E-05 | 0.000378 | 2179  | 4251  | 2457  | 5751  | 6657  | 4112  |
| Solyc01g006650.1.1   | -1.74419 | 2.816867 | 0.000961 | 0.006128 | 224   | 224   | 157   | 496   | 389   | 298   |
| Solyc03g123700.2.1   | -1.74409 | 5.547778 | 0.000326 | 0.00247  | 1743  | 1213  | 909   | 3192  | 2664  | 2032  |
| Solyc01g111980.2.1   | -1.74387 | 8.608357 | 0.000283 | 0.002188 | 7024  | 23443 | 8431  | 28554 | 25063 | 13773 |
| Solyc11g066770.1.1   | -1.74249 | 5.736991 | 1.67E-05 | 0.000191 | 1261  | 2329  | 1337  | 2868  | 4313  | 2206  |
| Solyc04g076960.2.1   | -1.74241 | 4.232833 | 6.92E-05 | 0.000659 | 266   | 786   | 713   | 853   | 1566  | 878   |
| Solyc08g066440.2.1   | -1.74196 | 5.342835 | 1.06E-05 | 0.000128 | 849   | 2085  | 955   | 2516  | 3114  | 1503  |
| Solyc02g063160.2.1   | -1.74077 | 5.191069 | 1.21E-05 | 0.000144 | 1027  | 1341  | 878   | 2186  | 2598  | 1534  |
| Solyc04g077980.1.1   | -1.7385  | 8.72465  | 0.000284 | 0.002194 | 7622  | 27496 | 7901  | 23839 | 32800 | 17415 |
| Solyc03g083160.1.1   | -1.73846 | 1.913461 | 0.001524 | 0.009073 | 76    | 169   | 106   | 211   | 271   | 165   |
| Solyc06g075370.2.1   | -1.73789 | 5.223552 | 8.13E-06 | 0.000102 | 718   | 1823  | 1026  | 2165  | 2930  | 1467  |
| Solyc09g090110.2.1   | -1.7354  | 6.526892 | 6.73E-05 | 0.000644 | 1567  | 4414  | 2855  | 4172  | 7498  | 4420  |
| Solyc04g081550.2.1   | -1.73165 | 7.643153 | 0.000235 | 0.001868 | 2792  | 11131 | 5981  | 8722  | 15871 | 10054 |
| Solyc06g083750.2.1   | -1.73162 | 4.289931 | 2.19E-05 | 0.000241 | 395   | 755   | 645   | 897   | 1419  | 1023  |
| Solyc10g085300.1.1   | -1.73136 | 5.594543 | 7.99E-05 | 0.000746 | 1615  | 1703  | 909   | 2860  | 3535  | 1989  |
| Solyc03g095730.2.1   | -1.73066 | 6.466226 | 3.97E-05 | 0.00041  | 2144  | 3485  | 2437  | 4317  | 6677  | 4267  |
| Solyc10g007280.2.1   | -1.73042 | 7.248585 | 0.000247 | 0.001952 | 4691  | 6589  | 2572  | 9531  | 10870 | 5981  |
| Solyc02g083860.2.1   | -1.72999 | 4.869181 | 5.36E-05 | 0.00053  | 436   | 1870  | 684   | 1530  | 1994  | 1448  |
| Solyc01g005560.2.1   | -1.7298  | 9.765368 | 0.000136 | 0.001179 | 24599 | 30309 | 22250 | 46543 | 69173 | 36725 |
| Solyc04g049350.2.1   | -1.72946 | 9.87425  | 0.000104 | 0.000938 | 21050 | 41263 | 25338 | 59837 | 66174 | 36614 |
| Solyc11g010500.1.1   | -1.72624 | 7.876009 | 0.000408 | 0.002974 | 4291  | 14217 | 5110  | 9464  | 25575 | 8425  |
| Solyc12g008500.1.1   | -1.72604 | 7.781251 | 0.000116 | 0.001027 | 5531  | 10621 | 4626  | 11838 | 18391 | 8679  |
| Solyc07g026660.2.1   | -1.72529 | 3.771069 | 0.000438 | 0.003163 | 415   | 341   | 400   | 632   | 718   | 864   |
| Solyc01g097350.2.1   | -1.7242  | 5.816854 | 3.87E-05 | 0.0004   | 1497  | 2352  | 1325  | 3580  | 3817  | 2292  |
| Solyc10g009060.1.1   | -1.72398 | 5.093228 | 9.02E-06 | 0.000112 | 759   | 1715  | 799   | 2022  | 2677  | 1294  |
| Solyc05g010260.2.1   | -1.72279 | 6.138695 | 4.82E-05 | 0.000483 | 1269  | 3081  | 2317  | 4243  | 5230  | 2787  |
| Solyc03g117020.2.1   | -1.72214 | 7.055824 | 0.000131 | 0.001136 | 2524  | 4911  | 4801  | 8634  | 8314  | 5661  |
| Solyc04g077270.2.1   | -1.72156 | 7.408456 | 0.00021  | 0.001697 | 4494  | 8243  | 3304  | 11744 | 10100 | 6940  |
| Solyc12g019320.1.1   | -1.72049 | 7.543634 | 0.000122 | 0.001072 | 5203  | 6826  | 4724  | 10950 | 14963 | 6965  |
| Solyc08g076530.2.1   | -1.72049 | 4.675886 | 2.08E-05 | 0.000231 | 644   | 924   | 738   | 1717  | 1541  | 1069  |
| Solyc05g015470.1.1   | -1.71996 | 5.419547 | 5.05E-05 | 0.000503 | 1397  | 1515  | 864   | 2222  | 3590  | 1739  |
| Solyc08g077290.1.1   | -1.71904 | 4.685734 | 1.28E-05 | 0.000151 | 557   | 1060  | 775   | 1093  | 2145  | 1250  |
| Solyc04g079120.2.1   | -1.71677 | 5.676779 | 0.000206 | 0.001667 | 1861  | 1478  | 1015  | 2793  | 4128  | 2058  |
| Solyc06g060230.2.1   | -1.71636 | 7.958479 | 0.000101 | 0.000912 | 5074  | 11373 | 7205  | 11264 | 18178 | 13003 |
| Solyc09g011920.2.1   | -1.71611 | 6.616071 | 6.08E-05 | 0.000592 | 2660  | 3831  | 2441  | 5399  | 7212  | 4321  |
| Solyc02g083460.2.1   | -1.71424 | 6.885048 | 0.000144 | 0.001228 | 2859  | 5840  | 2601  | 5155  | 11928 | 4430  |
| Solyc04g011520.2.1   | -1.71021 | 7.082991 | 0.000141 | 0.001211 | 4114  | 5389  | 2808  | 7383  | 9996  | 6005  |
| Solyc07g017860.2.1   | -1.70747 | 5.256935 | 7.50E-05 | 0.000707 | 848   | 1733  | 1046  | 3122  | 2011  | 1310  |
| Solyc04g080170.2.1   | -1.70717 | 5.834651 | 0.000151 | 0.001278 | 1901  | 2019  | 1138  | 3028  | 4914  | 2178  |
| Solyc07g064270.2.1   | -1.70616 | 6.988521 | 0.000139 | 0.001193 | 2127  | 5754  | 4342  | 5410  | 10125 | 6398  |
| Solyc11g072270.1.1   | -1.70568 | 5.15649  | 1.14E-05 | 0.000137 | 858   | 1365  | 1056  | 2072  | 2873  | 1327  |
| Solyc11g044610.1.1   | -1.70392 | 5.003762 | 0.000216 | 0.001734 | 999   | 823   | 929   | 1887  | 1474  | 1816  |
| RRNA_SL2.40sc03714_1 | -1.70252 | 5.422889 | 0.000126 | 0.001101 | 1133  | 1167  | 1454  | 1990  | 2450  | 2585  |
| Solyc07g053980.2.1   | -1.70204 | 7.133313 | 7.52E-05 | 0.000709 | 3188  | 6570  | 3657  | 7999  | 11013 | 5523  |
| Solyc06g061190.1.1   | -1.7011  | 4.950087 | 1.54E-05 | 0.000178 | 780   | 1434  | 716   | 1902  | 2442  | 1088  |
| Solyc01g107780.1.1   | -1.70006 | 6.843848 | 0.000754 | 0.00501  | 2894  | 6652  | 1835  | 3439  | 10305 | 6294  |
| Solyc06g051730.2.1   | -1.69984 | 5.606286 | 0.000141 | 0.001208 | 1595  | 1724  | 1021  | 3468  | 3252  | 1677  |
| Solyc01g108120.2.1   | -1.69914 | 4.793986 | 8.09E-06 | 0.000101 | 617   | 1264  | 762   | 1426  | 2200  | 1199  |
| Solyc06g076130.2.1   | -1.69777 | 6.378111 | 0.00012  | 0.001056 | 2126  | 4328  | 1610  | 5178  | 6151  | 3122  |
| Solyc07g062500.2.1   | -1.69736 | 7.537769 | 0.000731 | 0.004873 | 3984  | 8550  | 5265  | 4601  | 19972 | 9047  |
| Solyc11g021170.1.1   | -1.69616 | 4.398211 | 0.000275 | 0.002137 | 672   | 532   | 604   | 1187  | 1040  | 1191  |
| Solyc04g010300.2.1   | -1.69599 | 3.34322  | 0.000358 | 0.002659 | 242   | 538   | 210   | 728   | 649   | 358   |
| Solyc05g008510.2.1   | -1.69312 | 5.846157 | 0.000116 | 0.001024 | 1660  | 2461  | 1229  | 3989  | 3461  | 2279  |
| Solyc02g086120.2.1   | -1.69284 | 2.327208 | 0.001552 | 0.009207 | 91    | 217   | 170   | 220   | 462   | 207   |
| Solyc12g010690.1.1   | -1.69164 | 4.593321 | 1.31E-05 | 0.000154 | 538   | 1160  | 631   | 1235  | 1964  | 1015  |

|                    |          |          |          |          |       |       |       |       |       |       |
|--------------------|----------|----------|----------|----------|-------|-------|-------|-------|-------|-------|
| Solyc11g066760.1.1 | -1.69012 | 5.367167 | 1.18E-05 | 0.000141 | 964   | 1761  | 1171  | 2100  | 3503  | 1662  |
| Solyc01g106890.2.1 | -1.68886 | 4.290818 | 0.000468 | 0.003341 | 736   | 696   | 299   | 1195  | 1130  | 931   |
| Solyc10g083720.1.1 | -1.68701 | 8.411531 | 0.000148 | 0.001255 | 8807  | 14332 | 8790  | 21817 | 24247 | 12748 |
| Solyc04g015970.2.1 | -1.68595 | 8.843785 | 0.000119 | 0.001052 | 10827 | 19796 | 12902 | 26096 | 36150 | 17929 |
| Solyc05g053400.1.1 | -1.68428 | 2.845988 | 0.001529 | 0.009101 | 103   | 383   | 235   | 231   | 653   | 371   |
| Solyc11g068400.1.1 | -1.68289 | 6.242918 | 6.58E-05 | 0.000632 | 1562  | 3461  | 2285  | 3286  | 6240  | 3612  |
| Solyc08g007100.2.1 | -1.68247 | 3.444572 | 0.000125 | 0.001093 | 284   | 471   | 270   | 600   | 816   | 459   |
| Solyc04g063280.2.1 | -1.68164 | 7.22084  | 0.000103 | 0.000929 | 3267  | 7223  | 4017  | 7502  | 12799 | 5981  |
| Solyc02g068740.2.1 | -1.68096 | 4.324585 | 3.67E-05 | 0.000382 | 365   | 859   | 700   | 1108  | 1321  | 949   |
| Solyc07g005860.2.1 | -1.67975 | 5.362079 | 1.59E-05 | 0.000182 | 788   | 1892  | 1312  | 2322  | 3125  | 1672  |
| Solyc01g095990.2.1 | -1.67902 | 8.101943 | 0.000476 | 0.003386 | 9240  | 10294 | 5354  | 18491 | 19238 | 9704  |
| Solyc04g012160.2.1 | -1.67728 | 7.324379 | 0.000259 | 0.002025 | 2987  | 9112  | 4135  | 11230 | 10119 | 5931  |
| Solyc11g008380.1.1 | -1.67728 | 4.167153 | 3.00E-05 | 0.00032  | 406   | 847   | 484   | 1128  | 1330  | 655   |
| Solyc02g093750.2.1 | -1.67575 | 5.529154 | 8.52E-05 | 0.000788 | 1467  | 1873  | 921   | 2078  | 3459  | 2333  |
| Solyc11g045210.1.1 | -1.6747  | 4.628131 | 2.59E-05 | 0.00028  | 698   | 1028  | 586   | 1444  | 1663  | 1087  |
| Solyc07g065650.2.1 | -1.67461 | 7.068842 | 9.31E-05 | 0.00085  | 2999  | 5668  | 4115  | 6469  | 10254 | 6324  |
| Solyc10g081850.1.1 | -1.67368 | 6.440555 | 0.000163 | 0.001365 | 2637  | 3649  | 1813  | 5502  | 5992  | 3387  |
| Solyc07g006790.2.1 | -1.67333 | 8.339997 | 0.00012  | 0.001055 | 7205  | 14175 | 9680  | 18739 | 22267 | 14149 |
| Solyc03g083440.2.1 | -1.67304 | 7.948209 | 0.000263 | 0.002057 | 7544  | 8661  | 6201  | 12208 | 22329 | 9373  |
| Solyc12g013620.1.1 | -1.673   | 8.187734 | 0.000157 | 0.001322 | 5481  | 14654 | 8748  | 16880 | 23406 | 10767 |
| Solyc02g094030.2.1 | -1.67286 | 6.961293 | 0.000651 | 0.004418 | 1608  | 7492  | 3865  | 4352  | 10637 | 6563  |
| Solyc10g005060.2.1 | -1.67163 | 4.447644 | 0.000211 | 0.001704 | 744   | 543   | 594   | 1252  | 1785  | 791   |
| Solyc12g096270.1.1 | -1.67036 | 5.197603 | 2.02E-05 | 0.000225 | 1033  | 1457  | 925   | 2031  | 2586  | 1634  |
| Solyc03g082870.2.1 | -1.66962 | 5.067836 | 1.20E-05 | 0.000142 | 846   | 1521  | 847   | 1964  | 2412  | 1377  |
| Solyc06g061180.1.1 | -1.66907 | 5.443959 | 3.57E-05 | 0.000373 | 1050  | 2365  | 911   | 2496  | 2937  | 1943  |
| Solyc02g078540.2.1 | -1.666   | 7.496611 | 0.000136 | 0.001174 | 4286  | 7893  | 5123  | 10017 | 15098 | 6649  |
| Solyc05g050970.2.1 | -1.664   | 7.535341 | 0.000241 | 0.001911 | 4321  | 7857  | 5540  | 13185 | 10529 | 7344  |
| Solyc12g042360.1.1 | -1.66349 | 5.390422 | 1.59E-05 | 0.000183 | 946   | 1885  | 1221  | 2506  | 3130  | 1611  |
| Solyc01g109130.2.1 | -1.66137 | 4.819107 | 0.00015  | 0.001272 | 794   | 1154  | 702   | 2203  | 1484  | 948   |
| Solyc02g082510.1.1 | -1.66121 | 7.349649 | 0.000138 | 0.001189 | 3506  | 7793  | 4691  | 8479  | 14148 | 6154  |
| Solyc07g065960.1.1 | -1.65994 | 3.533396 | 0.000372 | 0.002752 | 377   | 499   | 208   | 617   | 810   | 534   |
| Solyc10g078490.1.1 | -1.65753 | 6.530029 | 0.00016  | 0.001343 | 2702  | 3446  | 2403  | 5873  | 5729  | 3930  |
| Solyc08g007190.2.1 | -1.65706 | 4.840308 | 1.45E-05 | 0.000168 | 610   | 1383  | 825   | 1485  | 2310  | 1180  |
| Solyc06g082780.2.1 | -1.65555 | 3.782188 | 0.000464 | 0.003318 | 407   | 692   | 237   | 1021  | 829   | 476   |
| Solyc01g098910.2.1 | -1.65537 | 6.880261 | 0.000137 | 0.001179 | 2868  | 5036  | 3380  | 7748  | 8385  | 4167  |
| Solyc05g008920.2.1 | -1.65533 | 5.590487 | 4.43E-05 | 0.000449 | 901   | 2521  | 1424  | 2834  | 3883  | 1713  |
| Solyc01g106420.2.1 | -1.65472 | 5.192076 | 2.59E-05 | 0.00028  | 846   | 1799  | 952   | 2404  | 2406  | 1404  |
| Solyc03g044260.2.1 | -1.65471 | 6.833923 | 0.000151 | 0.001284 | 2195  | 5541  | 3575  | 4876  | 8673  | 5853  |
| Solyc11g005670.1.1 | -1.65448 | 8.839648 | 0.001047 | 0.006586 | 15672 | 21290 | 6483  | 20190 | 38330 | 20993 |
| Solyc08g082610.2.1 | -1.64913 | 9.198749 | 0.00025  | 0.001966 | 11160 | 33406 | 15660 | 31868 | 47156 | 23158 |
| Solyc05g007460.2.1 | -1.64596 | 5.88113  | 0.000554 | 0.003841 | 2240  | 1957  | 1076  | 3644  | 4179  | 2269  |
| Solyc07g064290.2.1 | -1.64546 | 5.770063 | 7.54E-05 | 0.00071  | 1490  | 2289  | 1417  | 3396  | 3901  | 2064  |
| Solyc10g076360.1.1 | -1.64458 | 4.692581 | 6.14E-05 | 0.000596 | 804   | 1005  | 601   | 1540  | 1579  | 1188  |
| Solyc12g088370.1.1 | -1.64383 | 5.995372 | 0.000129 | 0.001125 | 1905  | 2810  | 1374  | 3719  | 4902  | 2418  |
| Solyc01g103770.2.1 | -1.64194 | 3.051921 | 0.000589 | 0.004051 | 141   | 440   | 261   | 459   | 615   | 344   |
| Solyc11g071330.1.1 | -1.64044 | 4.990822 | 1.68E-05 | 0.000192 | 744   | 1493  | 884   | 1928  | 2168  | 1300  |
| Solyc03g043640.2.1 | -1.63982 | 3.081299 | 0.00081  | 0.005316 | 152   | 448   | 258   | 353   | 839   | 322   |
| Solyc06g053230.2.1 | -1.63809 | 6.179282 | 0.000338 | 0.002544 | 2526  | 2317  | 1689  | 4428  | 5225  | 2771  |
| Solyc03g019680.2.1 | -1.63757 | 6.814361 | 0.000331 | 0.002504 | 3588  | 4392  | 2536  | 7491  | 7797  | 3988  |
| Solyc01g103470.2.1 | -1.63743 | 3.334011 | 0.000979 | 0.006227 | 332   | 474   | 161   | 562   | 611   | 494   |
| Solyc06g065210.2.1 | -1.63675 | 5.431205 | 0.000583 | 0.004016 | 1585  | 1449  | 863   | 3379  | 2548  | 1368  |
| Solyc09g075730.2.1 | -1.63595 | 2.643323 | 0.001605 | 0.009453 | 202   | 267   | 121   | 310   | 476   | 279   |
| Solyc06g082070.2.1 | -1.63452 | 3.833397 | 0.000252 | 0.001983 | 400   | 410   | 483   | 656   | 1007  | 729   |
| Solyc01g110150.2.1 | -1.63337 | 5.273366 | 0.000279 | 0.002161 | 1083  | 1267  | 1218  | 3169  | 2073  | 1231  |
| Solyc10g006540.2.1 | -1.63235 | 6.813912 | 0.000169 | 0.001412 | 3138  | 4793  | 2862  | 6943  | 8243  | 4159  |
| Solyc01g006150.2.1 | -1.63082 | 6.937513 | 0.000156 | 0.001315 | 3448  | 5031  | 3212  | 6131  | 9883  | 5172  |
| Solyc05g008200.2.1 | -1.63079 | 7.921923 | 0.000196 | 0.001603 | 5749  | 10626 | 7259  | 14904 | 16017 | 10023 |
| Solyc09g005920.2.1 | -1.62997 | 6.016033 | 9.39E-05 | 0.000856 | 1753  | 2711  | 1746  | 4003  | 4528  | 2503  |
| Solyc01g102290.2.1 | -1.62955 | 7.400285 | 0.001121 | 0.006997 | 6420  | 6371  | 2728  | 8687  | 14396 | 6483  |
| Solyc06g051720.2.1 | -1.62941 | 5.846827 | 8.79E-05 | 0.000808 | 1156  | 2510  | 1990  | 3459  | 4069  | 2283  |
| Solyc06g005260.2.1 | -1.62906 | 6.478014 | 0.000227 | 0.001812 | 2787  | 3469  | 2117  | 5460  | 5549  | 3889  |
| Solyc07g054060.2.1 | -1.62813 | 3.633661 | 0.001565 | 0.009262 | 456   | 337   | 303   | 460   | 1379  | 431   |
| Solyc04g074940.2.1 | -1.62635 | 4.37955  | 0.00012  | 0.001055 | 557   | 803   | 616   | 1500  | 1104  | 832   |
| Solyc11g044470.1.1 | -1.62544 | 4.838708 | 4.59E-05 | 0.000463 | 587   | 1408  | 876   | 1144  | 2650  | 1237  |
| Solyc02g089630.2.1 | -1.62507 | 7.741896 | 0.000778 | 0.005142 | 2618  | 12431 | 7565  | 11670 | 15606 | 9181  |
| Solyc04g064810.2.1 | -1.62469 | 6.211157 | 9.39E-05 | 0.000856 | 1576  | 3480  | 2311  | 4065  | 5931  | 2847  |
| Solyc01g091030.2.1 | -1.62424 | 6.097241 | 0.000226 | 0.001809 | 2279  | 2454  | 1603  | 3393  | 5025  | 3189  |
| Solyc02g021440.2.1 | -1.62392 | 8.357464 | 0.00033  | 0.002496 | 9779  | 14261 | 7507  | 20121 | 24344 | 11985 |
| Solyc06g024290.1.1 | -1.62167 | 4.299809 | 0.000481 | 0.003417 | 575   | 529   | 675   | 1118  | 923   | 1101  |
| Solyc04g007990.1.1 | -1.62049 | 4.706374 | 0.000838 | 0.005465 | 310   | 918   | 1318  | 1622  | 1674  | 1085  |
| Solyc11g071600.1.1 | -1.62045 | 3.522514 | 0.000594 | 0.004077 | 228   | 786   | 221   | 531   | 901   | 530   |
| Solyc04g080090.2.1 | -1.6196  | 4.617962 | 2.95E-05 | 0.000315 | 588   | 1159  | 685   | 1467  | 1767  | 956   |
| Solyc12g044910.1.1 | -1.61887 | 4.740949 | 3.35E-05 | 0.000354 | 638   | 1125  | 840   | 1668  | 1847  | 1027  |
| Solyc04g007530.2.1 | -1.61664 | 4.373362 | 7.93E-05 | 0.000741 | 591   | 901   | 513   | 930   | 1940  | 796   |
| Solyc10g081570.1.1 | -1.61403 | 5.034257 | 7.43E-05 | 0.000703 | 934   | 1670  | 660   | 1764  | 2841  | 1151  |
| Solyc11g039960.1.1 | -1.61239 | 5.146995 | 0.000491 | 0.003472 | 1354  | 1107  | 736   | 2487  | 2343  | 1193  |
| Solyc05g054550.2.1 | -1.61202 | 5.05961  | 3.79E-05 | 0.000393 | 957   | 1273  | 939   | 2060  | 2161  | 1377  |
| Solyc06g011490.2.1 | -1.60545 | 3.747182 | 0.001186 | 0.007333 | 272   | 467   | 550   | 365   | 1086  | 804   |
| Solyc03g123730.2.1 | -1.60349 | 6.756482 | 0.001536 | 0.009132 | 3475  | 4185  | 2592  | 9473  | 5193  | 3225  |
| Solyc02g089400.2.1 | -1.60322 | 7.218528 | 0.001174 | 0.007269 | 5620  | 4996  | 3030  | 10114 | 10073 | 5144  |
| Solyc12g011330.2.1 | -1.60249 | 6.400309 | 0.000197 | 0.00161  | 2317  | 3658  | 2274  | 5596  | 5745  | 3010  |
| Solyc04g008260.2.1 | -1.60058 | 3.391453 | 0.000861 | 0.005593 | 253   | 438   | 335   | 332   | 1085  | 451   |
| Solyc01g094550.2.1 | -1.59939 | 6.80367  | 0.000177 | 0.001468 | 2610  | 4994  | 3488  | 6867  | 7805  | 4290  |
| Solyc11g011780.1.1 | -1.59559 | 6.11503  | 0.000879 | 0.005691 | 2416  | 2755  | 1407  | 2476  | 4674  | 4205  |

|                      |          |          |          |          |       |        |        |        |        |        |
|----------------------|----------|----------|----------|----------|-------|--------|--------|--------|--------|--------|
| Solyc01g107290.2.1   | -1.59554 | 4.780367 | 4.21E-05 | 0.00043  | 698   | 1347   | 716    | 1708   | 1732   | 1144   |
| Solyc03g123870.2.1   | -1.59401 | 7.247537 | 0.000228 | 0.00182  | 3435  | 7985   | 4167   | 8801   | 11148  | 5951   |
| Solyc01g109760.2.1   | -1.59276 | 3.965122 | 0.000201 | 0.001637 | 507   | 635    | 355    | 912    | 1121   | 616    |
| Solyc09g009220.2.1   | -1.59172 | 5.036208 | 0.000421 | 0.003056 | 478   | 1783   | 1190   | 1033   | 3194   | 1532   |
| Solyc08g061160.1.1   | -1.5891  | 5.255652 | 0.000759 | 0.005034 | 1341  | 980    | 1118   | 2032   | 1806   | 2213   |
| Solyc03g058340.2.1   | -1.5884  | 5.136327 | 0.000179 | 0.001481 | 1215  | 1286   | 810    | 2278   | 2158   | 1418   |
| Solyc06g053810.2.1   | -1.58801 | 5.391322 | 0.000854 | 0.00556  | 597   | 1517   | 2035   | 1469   | 3409   | 2228   |
| Solyc01g088690.2.1   | -1.588   | 4.218248 | 0.000111 | 0.000987 | 320   | 1010   | 617    | 972    | 1407   | 786    |
| Solyc06g007540.2.1   | -1.58723 | 7.197616 | 0.000271 | 0.00211  | 3418  | 6824   | 4514   | 6235   | 10950  | 7467   |
| Solyc10g055410.1.1   | -1.58615 | 5.150337 | 5.76E-05 | 0.000565 | 1010  | 1562   | 922    | 2187   | 2149   | 1540   |
| Solyc08g006030.2.1   | -1.58569 | 4.34309  | 0.000151 | 0.00128  | 628   | 781    | 535    | 1290   | 1536   | 667    |
| Solyc07g055710.2.1   | -1.58534 | 6.72436  | 0.000378 | 0.002785 | 2872  | 5905   | 2122   | 5684   | 8547   | 4021   |
| Solyc08g016210.2.1   | -1.58511 | 6.675641 | 0.001249 | 0.007655 | 2276  | 6508   | 2164   | 2928   | 8665   | 5745   |
| Solyc05g007490.2.1   | -1.58473 | 4.813129 | 0.000103 | 0.000931 | 665   | 1037   | 1025   | 1924   | 1781   | 1014   |
| Solyc05g009730.1.1   | -1.58422 | 3.361907 | 0.001573 | 0.009306 | 218   | 385    | 401    | 293    | 895    | 562    |
| Solyc01g091620.2.1   | -1.58409 | 7.047186 | 0.000323 | 0.002454 | 2614  | 7125   | 4041   | 5559   | 11716  | 5696   |
| Solyc04g024340.2.1   | -1.58356 | 4.81494  | 3.30E-05 | 0.000349 | 664   | 1203   | 925    | 1450   | 2180   | 1173   |
| Solyc03g098220.2.1   | -1.5824  | 7.888573 | 0.000956 | 0.006103 | 8359  | 8928   | 5150   | 15866  | 15339  | 8660   |
| Solyc06g076350.2.1   | -1.57441 | 4.122245 | 0.000333 | 0.00252  | 523   | 530    | 577    | 1173   | 1148   | 612    |
| Solyc01g104970.2.1   | -1.57344 | 7.262013 | 0.00035  | 0.002614 | 4544  | 7006   | 3699   | 8700   | 11428  | 5998   |
| Solyc02g087950.2.1   | -1.57312 | 4.028921 | 0.000132 | 0.001143 | 466   | 756    | 406    | 990    | 1158   | 615    |
| Solyc02g088200.2.1   | -1.56827 | 5.313617 | 6.59E-05 | 0.000633 | 738   | 2090   | 1335   | 1871   | 2991   | 1842   |
| Solyc10g078500.1.1   | -1.56756 | 3.876384 | 0.000402 | 0.002932 | 395   | 453    | 544    | 916    | 882    | 623    |
| RRNA_SL2.40sc06977_2 | -1.56705 | 5.867015 | 0.000377 | 0.00278  | 1918  | 2055   | 1575   | 2636   | 3779   | 3145   |
| Solyc04g072640.2.1   | -1.56661 | 5.826537 | 0.000297 | 0.002279 | 1258  | 2992   | 1651   | 1960   | 5095   | 2727   |
| Solyc11g044620.1.1   | -1.56657 | 4.696044 | 0.000728 | 0.004862 | 878   | 688    | 810    | 1481   | 1210   | 1413   |
| Solyc01g017490.1.1   | -1.56565 | 3.850182 | 0.001483 | 0.008861 | 479   | 352    | 482    | 795    | 689    | 799    |
| Solyc02g072300.2.1   | -1.56542 | 7.612891 | 0.000309 | 0.002355 | 4973  | 9314   | 5569   | 11536  | 14204  | 7471   |
| Solyc12g055860.1.1   | -1.56375 | 4.698098 | 5.06E-05 | 0.000505 | 707   | 1087   | 774    | 1469   | 1842   | 1060   |
| Solyc11g072530.1.1   | -1.56086 | 5.97344  | 0.000142 | 0.001214 | 1507  | 3212   | 1768   | 3319   | 5150   | 2360   |
| Solyc05g054170.2.1   | -1.55705 | 5.293854 | 9.08E-05 | 0.000832 | 1240  | 1655   | 963    | 2132   | 3061   | 1509   |
| Solyc05g012900.2.1   | -1.55574 | 3.509924 | 0.000827 | 0.005409 | 402   | 465    | 237    | 539    | 900    | 494    |
| Solyc01g008820.2.1   | -1.55322 | 7.053941 | 0.000382 | 0.002813 | 2754  | 6336   | 4617   | 8464   | 8829   | 4988   |
| Solyc08g082820.2.1   | -1.55097 | 8.999027 | 0.001151 | 0.00715  | 9432  | 21261  | 21291  | 33644  | 26790  | 22500  |
| Solyc09g075920.1.1   | -1.55042 | 5.029491 | 0.001271 | 0.007769 | 959   | 2170   | 397    | 1315   | 2742   | 1514   |
| Solyc09g013110.2.1   | -1.54985 | 5.260846 | 6.87E-05 | 0.000656 | 1138  | 1642   | 1030   | 2006   | 2686   | 1709   |
| Solyc11g007720.1.1   | -1.54862 | 6.909004 | 0.000235 | 0.001868 | 2926  | 5688   | 3689   | 6243   | 8753   | 5204   |
| Solyc04g007520.2.1   | -1.54789 | 5.314274 | 0.000139 | 0.001192 | 646   | 2381   | 1303   | 2071   | 3052   | 1628   |
| Solyc01g086640.2.1   | -1.5477  | 6.019601 | 0.000495 | 0.003486 | 2165  | 3075   | 1265   | 3142   | 5351   | 2630   |
| Solyc05g052790.2.1   | -1.54689 | 5.325988 | 5.11E-05 | 0.000509 | 1052  | 1796   | 1205   | 2276   | 2938   | 1567   |
| Solyc01g006430.2.1   | -1.54595 | 8.722638 | 0.000461 | 0.003299 | 12544 | 17479  | 11830  | 22482  | 30416  | 18044  |
| Solyc06g068820.2.1   | -1.54565 | 4.911426 | 0.000193 | 0.001581 | 992   | 1318   | 673    | 1966   | 1949   | 1111   |
| Solyc12g006200.1.1   | -1.54506 | 4.281465 | 8.95E-05 | 0.000821 | 426   | 912    | 662    | 1011   | 1408   | 842    |
| Solyc09g083320.1.1   | -1.54413 | 4.48896  | 0.000115 | 0.00102  | 426   | 1218   | 742    | 1015   | 1853   | 965    |
| Solyc12g056630.1.1   | -1.54263 | 4.212431 | 0.000177 | 0.001468 | 353   | 1005   | 612    | 1174   | 1222   | 700    |
| Solyc01g099790.2.1   | -1.54104 | 7.456796 | 0.000513 | 0.003598 | 5380  | 7395   | 4676   | 10479  | 12184  | 6831   |
| Solyc03g118810.1.1   | -1.53776 | 6.816294 | 0.001038 | 0.006535 | 3468  | 6214   | 2059   | 7525   | 7354   | 3986   |
| Solyc02g069350.2.1   | -1.53746 | 4.119058 | 9.92E-05 | 0.000898 | 441   | 796    | 535    | 838    | 1367   | 739    |
| Solyc08g065860.2.1   | -1.5373  | 4.693    | 6.77E-05 | 0.000647 | 707   | 1223   | 711    | 1216   | 2051   | 1118   |
| Solyc09g011230.2.1   | -1.537   | 5.205834 | 0.000107 | 0.00096  | 1127  | 1514   | 1017   | 2107   | 2269   | 1674   |
| Solyc06g009050.2.1   | -1.5361  | 8.474789 | 0.000945 | 0.006049 | 12237 | 13304  | 8955   | 21570  | 21438  | 15384  |
| Solyc02g082920.2.1   | -1.5358  | 11.8165  | 0.000885 | 0.005725 | 79773 | 189770 | 110816 | 132891 | 337041 | 156614 |
| Solyc02g086360.2.1   | -1.53557 | 4.45385  | 0.000374 | 0.00276  | 794   | 904    | 447    | 1186   | 1756   | 808    |
| Solyc06g065740.2.1   | -1.53463 | 5.172037 | 0.000195 | 0.001597 | 1242  | 1416   | 863    | 2146   | 2556   | 1365   |
| Solyc12g014350.1.1   | -1.53389 | 7.805683 | 0.000485 | 0.003439 | 5584  | 11395  | 6344   | 13915  | 14380  | 8859   |
| Solyc07g052790.1.1   | -1.53332 | 5.110092 | 0.000533 | 0.003727 | 639   | 2226   | 956    | 1053   | 3340   | 1608   |
| Solyc03g121860.1.1   | -1.52635 | 6.635846 | 0.000292 | 0.002248 | 2657  | 4992   | 2683   | 5404   | 7262   | 4051   |
| Solyc04g008010.2.1   | -1.52549 | 5.840525 | 0.000191 | 0.001567 | 1317  | 3029   | 1715   | 3380   | 4029   | 2205   |
| Solyc01g007980.2.1   | -1.52501 | 5.946396 | 0.000673 | 0.004546 | 2200  | 2625   | 1282   | 3602   | 3741   | 2745   |
| Solyc11g011190.1.1   | -1.52266 | 5.730415 | 0.000206 | 0.00167  | 1099  | 3084   | 1569   | 2420   | 3892   | 2527   |
| Solyc03g120390.2.1   | -1.52253 | 6.255381 | 0.000239 | 0.001895 | 1709  | 4156   | 2281   | 4058   | 5616   | 3159   |
| Solyc09g005910.2.1   | -1.52193 | 7.363708 | 0.000543 | 0.003781 | 4936  | 7288   | 4440   | 9748   | 11844  | 6151   |
| Solyc05g013450.2.1   | -1.51922 | 6.06979  | 0.000227 | 0.00181  | 1468  | 3268   | 2305   | 3250   | 5056   | 2963   |
| Solyc02g021600.1.1   | -1.51905 | 4.776906 | 0.000105 | 0.000945 | 534   | 1551   | 881    | 1560   | 1810   | 1164   |
| Solyc11g022540.1.1   | -1.51572 | 6.751634 | 0.000347 | 0.002598 | 2478  | 5412   | 3457   | 6093   | 8238   | 3957   |
| Solyc05g008070.2.1   | -1.51549 | 3.725645 | 0.000703 | 0.004716 | 441   | 655    | 259    | 701    | 1004   | 525    |
| Solyc02g088690.2.1   | -1.51524 | 7.270575 | 0.000652 | 0.004421 | 3403  | 8679   | 4553   | 9472   | 12047  | 4926   |
| Solyc01g100290.2.1   | -1.51435 | 4.608924 | 9.52E-05 | 0.000866 | 584   | 1169   | 790    | 1452   | 1732   | 911    |
| Solyc07g047800.2.1   | -1.51401 | 9.1007   | 0.000925 | 0.005954 | 17404 | 24564  | 13662  | 35254  | 36428  | 19931  |
| Solyc02g089730.1.1   | -1.51396 | 3.546908 | 0.000413 | 0.003009 | 253   | 610    | 378    | 655    | 827    | 469    |
| Solyc01g067000.2.1   | -1.51382 | 6.806744 | 0.000426 | 0.003092 | 3030  | 6044   | 2769   | 6143   | 8472   | 4309   |
| Solyc02g071520.2.1   | -1.51378 | 4.347207 | 0.000605 | 0.004143 | 323   | 1094   | 786    | 721    | 1665   | 1031   |
| Solyc01g079410.2.1   | -1.5137  | 3.201242 | 0.001558 | 0.009235 | 196   | 436    | 329    | 649    | 548    | 319    |
| Solyc01g094050.1.1   | -1.51328 | 5.254022 | 0.000158 | 0.001327 | 923   | 1991   | 1123   | 2625   | 2436   | 1295   |
| Solyc11g011220.1.1   | -1.51119 | 6.360573 | 0.000293 | 0.002251 | 2176  | 3699   | 2571   | 4708   | 5196   | 3586   |
| Solyc11g012510.1.1   | -1.50915 | 5.707156 | 0.000599 | 0.004106 | 868   | 3568   | 1502   | 2192   | 4626   | 2164   |
| Solyc02g090740.2.1   | -1.50826 | 4.397392 | 0.00011  | 0.000979 | 596   | 923    | 630    | 1142   | 1531   | 854    |
| Solyc10g084140.1.1   | -1.50714 | 7.003927 | 0.000401 | 0.002929 | 3446  | 6402   | 3586   | 7266   | 9547   | 4835   |
| Solyc08g013900.2.1   | -1.50652 | 6.253909 | 0.00085  | 0.005537 | 2811  | 3008   | 1698   | 4233   | 5784   | 2831   |
| Solyc10g047140.1.1   | -1.50646 | 6.783635 | 0.00054  | 0.003764 | 3479  | 4911   | 2808   | 6452   | 7652   | 4287   |
| Solyc02g082830.1.1   | -1.50534 | 6.197975 | 0.000961 | 0.006127 | 1172  | 4094   | 2771   | 2743   | 6503   | 3309   |
| Solyc01g108200.2.1   | -1.50484 | 5.124797 | 0.00043  | 0.003114 | 1058  | 1459   | 1006   | 2632   | 1695   | 1296   |
| Solyc12g009230.1.1   | -1.50411 | 3.846504 | 0.000258 | 0.002018 | 380   | 674    | 437    | 752    | 921    | 675    |
| Solyc12g096050.1.1   | -1.50321 | 5.762222 | 0.000262 | 0.002051 | 1564  | 2357   | 1616   | 3272   | 3664   | 2091   |

|                      |          |          |          |          |       |       |       |       |        |       |
|----------------------|----------|----------|----------|----------|-------|-------|-------|-------|--------|-------|
| Solyc10g086420.1.1   | -1.50145 | 7.107652 | 0.000545 | 0.003791 | 3578  | 7295  | 3781  | 6096  | 12082  | 5517  |
| Solyc11g066060.1.1   | -1.50026 | 8.985454 | 0.001148 | 0.007138 | 8657  | 29973 | 17488 | 30875 | 35458  | 18547 |
| Solyc04g082480.2.1   | -1.4993  | 5.656653 | 0.000401 | 0.002929 | 861   | 3413  | 1466  | 2554  | 3727   | 2150  |
| Solyc12g005590.1.1   | -1.49915 | 4.641211 | 0.000172 | 0.001428 | 719   | 1096  | 739   | 1460  | 2006   | 807   |
| RRNA_SL2.40sc06977_1 | -1.49642 | 6.58229  | 0.001215 | 0.00748  | 2977  | 3000  | 3358  | 4557  | 5389   | 5297  |
| Solyc02g069720.2.1   | -1.4957  | 6.567484 | 0.000501 | 0.003529 | 3027  | 3920  | 2622  | 5057  | 6799   | 3949  |
| Solyc01g005680.2.1   | -1.49266 | 4.241023 | 0.000223 | 0.001787 | 548   | 726   | 628   | 940   | 1298   | 872   |
| Solyc06g076260.2.1   | -1.49217 | 5.645085 | 0.000157 | 0.001323 | 1427  | 2173  | 1535  | 2476  | 3735   | 2149  |
| Solyc09g075510.2.1   | -1.49214 | 4.608745 | 0.000139 | 0.001197 | 660   | 1331  | 618   | 1352  | 1647   | 1029  |
| Solyc03g006650.2.1   | -1.49089 | 6.518142 | 0.00038  | 0.002801 | 2432  | 4534  | 2691  | 5025  | 7125   | 3373  |
| Solyc06g072030.1.1   | -1.48915 | 5.925337 | 0.00032  | 0.002433 | 1693  | 2477  | 2026  | 3538  | 3870   | 2559  |
| Solyc10g084800.1.1   | -1.4886  | 7.496698 | 0.000645 | 0.004387 | 4966  | 8585  | 5332  | 10849 | 12776  | 6600  |
| Solyc08g069000.2.1   | -1.48859 | 5.942951 | 0.001391 | 0.0084   | 2242  | 2120  | 1645  | 4285  | 4278   | 1808  |
| Solyc01g008550.2.1   | -1.48834 | 8.87965  | 0.000843 | 0.005495 | 14311 | 19948 | 13785 | 28170 | 30248  | 19093 |
| Solyc01g098410.2.1   | -1.48724 | 4.135138 | 0.000449 | 0.003228 | 348   | 1016  | 569   | 645   | 1359   | 906   |
| Solyc01g105100.2.1   | -1.48673 | 7.111228 | 0.000508 | 0.003571 | 3630  | 7031  | 4014  | 8061  | 9676   | 5305  |
| Solyc12g088440.1.1   | -1.48643 | 4.815065 | 0.000159 | 0.001338 | 801   | 1389  | 766   | 1773  | 1992   | 957   |
| Solyc05g026050.2.1   | -1.48261 | 5.646333 | 0.000157 | 0.001324 | 1309  | 2418  | 1552  | 2750  | 3753   | 1910  |
| Solyc03g117110.2.1   | -1.48103 | 5.291459 | 0.000343 | 0.002578 | 1213  | 1609  | 1161  | 2778  | 2321   | 1335  |
| Solyc11g068710.1.1   | -1.48082 | 6.484962 | 0.000945 | 0.006049 | 2464  | 5677  | 1771  | 5040  | 6305   | 3551  |
| Solyc10g007010.1.1   | -1.48041 | 3.653631 | 0.00077  | 0.005094 | 271   | 729   | 383   | 466   | 1009   | 622   |
| Solyc07g063950.2.1   | -1.47935 | 3.96869  | 0.000311 | 0.002371 | 313   | 802   | 575   | 780   | 1143   | 676   |
| Solyc06g082650.2.1   | -1.4776  | 8.400846 | 0.000673 | 0.004544 | 7872  | 17556 | 10973 | 15631 | 25172  | 15343 |
| Solyc04g077290.1.1   | -1.47473 | 3.492393 | 0.00077  | 0.005099 | 252   | 526   | 414   | 501   | 953    | 456   |
| Solyc04g009800.2.1   | -1.47439 | 6.416977 | 0.000463 | 0.00331  | 2591  | 3659  | 2537  | 4760  | 5834   | 3518  |
| Solyc02g069240.1.1   | -1.47333 | 4.084999 | 0.000461 | 0.0033   | 334   | 971   | 570   | 642   | 1347   | 834   |
| Solyc03g007470.2.1   | -1.47272 | 6.728486 | 0.001308 | 0.007962 | 3714  | 4245  | 2728  | 7013  | 6023   | 4166  |
| Solyc09g075020.2.1   | -1.47207 | 10.5031  | 0.00126  | 0.007709 | 36724 | 85279 | 37589 | 59474 | 128326 | 60225 |
| Solyc03g121070.2.1   | -1.47191 | 6.252559 | 0.000998 | 0.006327 | 1220  | 4041  | 3131  | 4433  | 4840   | 3195  |
| Solyc05g052210.2.1   | -1.47083 | 5.023749 | 0.00019  | 0.001564 | 763   | 1999  | 860   | 1352  | 2744   | 1407  |
| Solyc11g005350.1.1   | -1.46944 | 4.236533 | 0.000853 | 0.005553 | 663   | 659   | 544   | 697   | 1466   | 955   |
| Solyc11g065000.1.1   | -1.46908 | 6.603698 | 0.000557 | 0.003857 | 2289  | 5539  | 2855  | 5673  | 6011   | 4149  |
| Solyc07g008170.2.1   | -1.46873 | 5.044054 | 0.000123 | 0.001081 | 872   | 1753  | 929   | 1969  | 2101   | 1333  |
| Solyc11g040110.1.1   | -1.46604 | 6.357822 | 0.000546 | 0.003794 | 1630  | 4400  | 2964  | 3888  | 5851   | 3770  |
| Solyc10g079260.1.1   | -1.46572 | 5.724675 | 0.000238 | 0.001891 | 1296  | 2704  | 1692  | 2467  | 4114   | 2264  |
| Solyc07g049280.2.1   | -1.46513 | 4.270934 | 0.000258 | 0.002018 | 414   | 894   | 749   | 994   | 1419   | 796   |
| Solyc12g009990.1.1   | -1.465   | 8.316892 | 0.001549 | 0.009194 | 10265 | 14301 | 8469  | 22315 | 19797  | 10506 |
| Solyc08g066870.2.1   | -1.46123 | 7.481357 | 0.001123 | 0.007003 | 5848  | 8425  | 4397  | 10010 | 13754  | 6363  |
| Solyc11g010390.1.1   | -1.45943 | 3.781902 | 0.000392 | 0.002881 | 329   | 669   | 474   | 744   | 889    | 606   |
| Solyc09g075910.1.1   | -1.45935 | 5.053642 | 0.001252 | 0.007671 | 1029  | 2204  | 483   | 1862  | 2420   | 1256  |
| Solyc03g119420.2.1   | -1.45837 | 5.712314 | 0.000247 | 0.001952 | 1247  | 2758  | 1694  | 2353  | 3938   | 2393  |
| Solyc11g017190.1.1   | -1.45673 | 3.624775 | 0.000492 | 0.003476 | 310   | 614   | 399   | 620   | 890    | 527   |
| Solyc06g074840.2.1   | -1.45604 | 6.063497 | 0.000412 | 0.003003 | 2007  | 3097  | 1922  | 3434  | 5017   | 2701  |
| Solyc12g011130.1.1   | -1.45418 | 3.862636 | 0.001232 | 0.007566 | 552   | 512   | 378   | 858   | 976    | 560   |
| Solyc09g008340.2.1   | -1.45355 | 6.849519 | 0.000561 | 0.003879 | 3247  | 5487  | 3501  | 6126  | 7926   | 4906  |
| Solyc04g071510.2.1   | -1.45314 | 3.680559 | 0.000636 | 0.004337 | 275   | 717   | 425   | 545   | 1051   | 555   |
| Solyc06g009380.2.1   | -1.45276 | 7.747353 | 0.000845 | 0.005509 | 4847  | 10541 | 7823  | 11965 | 15026  | 8543  |
| Solyc08g077350.2.1   | -1.4526  | 6.17543  | 0.000464 | 0.003318 | 1570  | 3625  | 2654  | 3640  | 5051   | 3186  |
| Solyc01g087570.2.1   | -1.45211 | 3.955759 | 0.000438 | 0.003163 | 350   | 767   | 559   | 684   | 1351   | 606   |
| Solyc03g117950.2.1   | -1.45205 | 9.525016 | 0.000943 | 0.006043 | 19789 | 38413 | 21480 | 35546 | 59538  | 29112 |
| Solyc07g053910.2.1   | -1.45159 | 7.127932 | 0.001123 | 0.007003 | 4615  | 6613  | 3448  | 8521  | 9176   | 5309  |
| Solyc01g098160.2.1   | -1.4494  | 7.315151 | 0.000823 | 0.005389 | 4356  | 7747  | 4918  | 9625  | 9973   | 6374  |
| Solyc12g014600.1.1   | -1.44796 | 4.542815 | 0.00049  | 0.00347  | 723   | 895   | 766   | 1570  | 1397   | 834   |
| Solyc02g093360.2.1   | -1.44546 | 5.100236 | 0.000953 | 0.006089 | 546   | 2284  | 1157  | 1181  | 2940   | 1636  |
| Solyc07g064440.2.1   | -1.44515 | 6.265635 | 0.000669 | 0.004518 | 1698  | 4743  | 2257  | 3745  | 6425   | 2878  |
| Solyc04g072910.2.1   | -1.44506 | 7.37987  | 0.001565 | 0.009265 | 6072  | 7130  | 3919  | 8925  | 11693  | 6849  |
| Solyc06g074650.2.1   | -1.44299 | 7.432752 | 0.000874 | 0.005667 | 3962  | 10102 | 5256  | 8740  | 13333  | 6823  |
| Solyc12g006180.1.1   | -1.44285 | 5.209912 | 0.000298 | 0.002289 | 1182  | 1518  | 1123  | 2272  | 2524   | 1325  |
| Solyc06g050770.2.1   | -1.44113 | 7.113875 | 0.00071  | 0.004764 | 3684  | 6650  | 4519  | 7833  | 9735   | 5342  |
| Solyc10g050230.1.1   | -1.44044 | 5.226756 | 0.000159 | 0.001336 | 988   | 1970  | 1121  | 1987  | 2814   | 1442  |
| Solyc04g057880.2.1   | -1.43915 | 6.001996 | 0.000421 | 0.003056 | 1555  | 3582  | 1959  | 3225  | 4928   | 2547  |
| Solyc09g098130.1.1   | -1.43899 | 3.986381 | 0.000615 | 0.004207 | 298   | 958   | 543   | 680   | 1264   | 697   |
| Solyc03g113390.2.1   | -1.43857 | 6.438368 | 0.000792 | 0.005223 | 1851  | 5441  | 2590  | 3928  | 7206   | 3491  |
| Solyc02g088680.1.1   | -1.43767 | 3.87998  | 0.000561 | 0.003883 | 368   | 825   | 434   | 820   | 1193   | 482   |
| Solyc11g011610.1.1   | -1.43751 | 5.891663 | 0.000516 | 0.003617 | 1776  | 3109  | 1537  | 3364  | 3831   | 2475  |
| Solyc07g047720.2.1   | -1.43674 | 5.232432 | 0.000254 | 0.001994 | 774   | 1962  | 1412  | 1684  | 2994   | 1600  |
| Solyc08g080080.2.1   | -1.43666 | 4.965713 | 0.000274 | 0.002129 | 907   | 1344  | 1030  | 2017  | 2076   | 1065  |
| Solyc03g005300.2.1   | -1.43556 | 5.250311 | 0.000299 | 0.002293 | 1102  | 1768  | 1177  | 2507  | 2265   | 1409  |
| Solyc07g066070.2.1   | -1.43503 | 6.246506 | 0.001258 | 0.0077   | 2784  | 3113  | 1890  | 4562  | 4776   | 3021  |
| Solyc11g069690.1.1   | -1.43463 | 3.963945 | 0.000614 | 0.004199 | 331   | 803   | 581   | 637   | 1122   | 782   |
| Solyc01g100850.2.1   | -1.43452 | 4.454508 | 0.00093  | 0.005978 | 508   | 1051  | 814   | 1689  | 1179   | 683   |
| Solyc10g079420.1.1   | -1.43439 | 8.800532 | 0.001245 | 0.007633 | 14483 | 21024 | 11691 | 23319 | 31204  | 18755 |
| Solyc12g094550.1.1   | -1.43362 | 5.212934 | 0.000217 | 0.001741 | 1059  | 1685  | 1193  | 1763  | 3138   | 1386  |
| Solyc02g069710.2.1   | -1.43239 | 4.717141 | 0.000223 | 0.001784 | 803   | 1235  | 757   | 1392  | 2026   | 981   |
| Solyc05g014120.1.1   | -1.43199 | 3.271012 | 0.001541 | 0.009159 | 302   | 435   | 279   | 472   | 701    | 414   |
| Solyc01g111090.2.1   | -1.43171 | 6.104226 | 0.000441 | 0.003181 | 1783  | 3583  | 2154  | 3430  | 5055   | 2884  |
| Solyc01g100000.2.1   | -1.4287  | 4.712919 | 0.000334 | 0.002523 | 814   | 979   | 904   | 1476  | 1730   | 1072  |
| Solyc03g081220.1.1   | -1.4277  | 5.025417 | 0.00016  | 0.001342 | 873   | 1779  | 936   | 1498  | 2533   | 1382  |
| Solyc10g079710.1.1   | -1.42751 | 3.327247 | 0.001464 | 0.008768 | 225   | 587   | 316   | 549   | 769    | 359   |
| Solyc05g007190.2.1   | -1.4271  | 6.015114 | 0.000558 | 0.003863 | 1899  | 3187  | 1879  | 3774  | 4613   | 2337  |
| Solyc04g077920.2.1   | -1.42659 | 7.235863 | 0.000945 | 0.006049 | 4178  | 7657  | 4548  | 6891  | 12683  | 5884  |
| Solyc03g096810.2.1   | -1.4238  | 6.752795 | 0.000711 | 0.004769 | 2963  | 5769  | 3115  | 5487  | 8089   | 4318  |
| Solyc08g067810.2.1   | -1.42164 | 5.042854 | 0.000155 | 0.001308 | 872   | 1767  | 993   | 1598  | 2430   | 1405  |
| RRNA_11_13           | -1.42086 | 4.079962 | 0.000761 | 0.005041 | 517   | 704   | 552   | 606   | 1424   | 790   |

|                    |          |          |          |          |      |       |       |       |       |       |
|--------------------|----------|----------|----------|----------|------|-------|-------|-------|-------|-------|
| Solyc01g112050.2.1 | -1.42048 | 6.61956  | 0.000888 | 0.005738 | 2674 | 5408  | 2796  | 5800  | 7303  | 3322  |
| Solyc01g094060.2.1 | -1.42038 | 6.593562 | 0.000707 | 0.004742 | 2468 | 5105  | 3074  | 5621  | 6472  | 3729  |
| Solyc04g082030.1.1 | -1.41908 | 6.849394 | 0.001578 | 0.009331 | 3979 | 4719  | 3276  | 6986  | 8727  | 3648  |
| Solyc11g013490.1.1 | -1.41742 | 5.561113 | 0.000304 | 0.002324 | 1387 | 2329  | 1391  | 2181  | 3763  | 1933  |
| Solyc12g098820.1.1 | -1.4173  | 6.770655 | 0.000794 | 0.005234 | 3201 | 5311  | 3277  | 5593  | 8365  | 4223  |
| Solyc09g005870.1.1 | -1.41593 | 4.650764 | 0.000571 | 0.003944 | 610  | 1211  | 917   | 855   | 2221  | 1148  |
| Solyc08g008490.2.1 | -1.41586 | 5.878488 | 0.000752 | 0.004999 | 1399 | 3629  | 1683  | 2426  | 5016  | 2456  |
| Solyc07g041010.2.1 | -1.41511 | 6.516009 | 0.000817 | 0.005353 | 2688 | 4271  | 2865  | 5437  | 5809  | 3620  |
| Solyc04g009380.1.1 | -1.41354 | 5.518639 | 0.001532 | 0.00911  | 1903 | 1730  | 1009  | 2521  | 3346  | 1722  |
| Solyc05g012070.2.1 | -1.41249 | 6.31609  | 0.000655 | 0.00444  | 1886 | 4197  | 2762  | 3680  | 5948  | 3489  |
| Solyc07g005200.2.1 | -1.41122 | 7.013125 | 0.000933 | 0.00599  | 3946 | 6009  | 3893  | 7067  | 9184  | 5023  |
| Solyc05g055480.2.1 | -1.41107 | 5.941441 | 0.000858 | 0.005584 | 1833 | 3049  | 1785  | 3982  | 3417  | 2434  |
| Solyc03g095710.2.1 | -1.40641 | 5.043966 | 0.000199 | 0.00162  | 844  | 1676  | 1113  | 1707  | 2619  | 1198  |
| Solyc06g059980.2.1 | -1.40467 | 4.391487 | 0.000352 | 0.002626 | 476  | 1043  | 799   | 1041  | 1650  | 806   |
| Solyc01g007900.2.1 | -1.40442 | 4.356804 | 0.000432 | 0.003123 | 484  | 1280  | 589   | 1174  | 1444  | 755   |
| Solyc04g007860.2.1 | -1.40212 | 7.040057 | 0.000954 | 0.006097 | 3470 | 6974  | 4165  | 7096  | 10065 | 4765  |
| Solyc03g113870.1.1 | -1.39975 | 5.165072 | 0.000782 | 0.005164 | 1346 | 1632  | 814   | 2076  | 2350  | 1407  |
| Solyc05g054770.2.1 | -1.39916 | 5.322541 | 0.000612 | 0.004189 | 680  | 2418  | 1545  | 1827  | 3111  | 1684  |
| Solyc09g061310.2.1 | -1.39893 | 6.600833 | 0.000934 | 0.005994 | 2330 | 5199  | 3335  | 5782  | 6570  | 3553  |
| Solyc06g083440.2.1 | -1.39641 | 4.311526 | 0.000428 | 0.003104 | 511  | 991   | 686   | 1205  | 1254  | 757   |
| Solyc07g065740.2.1 | -1.39529 | 4.957887 | 0.000248 | 0.001959 | 916  | 1588  | 910   | 1597  | 2421  | 1156  |
| Solyc09g074860.2.1 | -1.395   | 5.895616 | 0.000575 | 0.003969 | 1580 | 2892  | 2058  | 2748  | 4231  | 2706  |
| Solyc11g007770.1.1 | -1.39457 | 6.602878 | 0.001431 | 0.008605 | 2073 | 6056  | 3142  | 3892  | 6949  | 4880  |
| Solyc03g117030.1.1 | -1.39434 | 5.495782 | 0.000303 | 0.002317 | 1148 | 2490  | 1432  | 2156  | 3314  | 1928  |
| Solyc01g094860.2.1 | -1.39198 | 5.356353 | 0.000399 | 0.002921 | 1293 | 2195  | 1036  | 2211  | 3026  | 1531  |
| Solyc09g005080.1.1 | -1.38967 | 4.681238 | 0.00078  | 0.005154 | 789  | 1540  | 571   | 1255  | 2228  | 869   |
| Solyc04g081410.2.1 | -1.38883 | 5.695012 | 0.000418 | 0.003036 | 1426 | 2468  | 1774  | 2764  | 3554  | 2117  |
| Solyc08g062500.2.1 | -1.38849 | 6.23135  | 0.001638 | 0.009608 | 2618 | 3394  | 2012  | 4897  | 4763  | 2574  |
| Solyc04g064820.2.1 | -1.38844 | 4.67908  | 0.000667 | 0.00451  | 675  | 1339  | 838   | 1810  | 1519  | 822   |
| Solyc10g079000.1.1 | -1.38786 | 5.596096 | 0.000348 | 0.002607 | 1353 | 2480  | 1520  | 2522  | 3269  | 2052  |
| Solyc06g051410.2.1 | -1.38662 | 4.850051 | 0.001429 | 0.008597 | 949  | 1113  | 964   | 874   | 2222  | 1576  |
| Solyc10g075040.1.1 | -1.38388 | 5.27842  | 0.000306 | 0.00234  | 1022 | 2146  | 1206  | 1939  | 3193  | 1381  |
| Solyc09g008310.2.1 | -1.38362 | 5.354562 | 0.000814 | 0.005337 | 1534 | 1603  | 1127  | 2295  | 3017  | 1453  |
| Solyc06g034110.2.1 | -1.38344 | 5.052953 | 0.000262 | 0.002049 | 942  | 1578  | 1112  | 1938  | 2262  | 1224  |
| Solyc07g005600.2.1 | -1.38108 | 7.98584  | 0.001319 | 0.008016 | 6363 | 13395 | 8712  | 12496 | 19799 | 9772  |
| Solyc03g121590.2.1 | -1.38092 | 8.520251 | 0.001396 | 0.008422 | 9620 | 19863 | 11827 | 19438 | 27441 | 13777 |
| Solyc06g060100.2.1 | -1.37929 | 4.156272 | 0.000605 | 0.004147 | 473  | 831   | 651   | 1096  | 1129  | 659   |
| Solyc01g107740.2.1 | -1.37848 | 4.615962 | 0.001212 | 0.007465 | 901  | 1181  | 563   | 1541  | 1695  | 797   |
| Solyc05g009020.2.1 | -1.37543 | 4.305059 | 0.000419 | 0.003047 | 522  | 1065  | 637   | 983   | 1518  | 764   |
| Solyc04g007710.2.1 | -1.37417 | 7.626808 | 0.001466 | 0.008775 | 5757 | 10132 | 6072  | 10456 | 15062 | 7222  |
| Solyc07g040690.2.1 | -1.37232 | 6.115475 | 0.000805 | 0.005289 | 1864 | 3749  | 2203  | 3717  | 5159  | 2560  |
| Solyc05g008830.2.1 | -1.37019 | 7.011305 | 0.001375 | 0.008316 | 4183 | 6088  | 3795  | 6874  | 8892  | 5203  |
| Solyc05g041870.1.1 | -1.3701  | 4.502059 | 0.000658 | 0.004457 | 574  | 1225  | 764   | 1492  | 1274  | 846   |
| Solyc03g097970.2.1 | -1.36889 | 6.352242 | 0.001083 | 0.006777 | 1784 | 4740  | 2916  | 4468  | 5595  | 3219  |
| Solyc11g065070.1.1 | -1.36836 | 6.654453 | 0.00117  | 0.007253 | 2541 | 5564  | 3355  | 5063  | 8107  | 3633  |
| Solyc02g065050.1.1 | -1.36464 | 4.592453 | 0.000885 | 0.005721 | 611  | 1701  | 567   | 1233  | 1594  | 1050  |
| Solyc01g007770.2.1 | -1.36449 | 4.604026 | 0.000594 | 0.004079 | 556  | 1519  | 771   | 1031  | 2059  | 969   |
| Solyc06g065720.1.1 | -1.36413 | 5.252636 | 0.000415 | 0.003022 | 929  | 2059  | 1346  | 1991  | 3078  | 1302  |
| Solyc04g014270.2.1 | -1.36307 | 6.490013 | 0.000987 | 0.006269 | 2346 | 4819  | 3012  | 4783  | 6023  | 3714  |
| Solyc08g006940.2.1 | -1.36193 | 5.243346 | 0.000455 | 0.003267 | 825  | 2362  | 1261  | 1833  | 2796  | 1562  |
| Solyc05g055760.2.1 | -1.36149 | 5.416464 | 0.001549 | 0.009194 | 756  | 2194  | 1938  | 2363  | 2193  | 2075  |
| Solyc01g099810.2.1 | -1.36108 | 5.814573 | 0.001193 | 0.007371 | 1148 | 3248  | 2141  | 2414  | 4647  | 2288  |
| Solyc11g069780.1.1 | -1.35991 | 5.019143 | 0.000313 | 0.002387 | 775  | 1820  | 1126  | 1479  | 2384  | 1414  |
| Solyc05g009160.2.1 | -1.35683 | 5.275844 | 0.000421 | 0.003055 | 912  | 2222  | 1339  | 1842  | 3161  | 1445  |
| Solyc01g088710.2.1 | -1.35589 | 4.694184 | 0.000399 | 0.002917 | 638  | 1432  | 893   | 1403  | 1904  | 944   |
| Solyc05g056100.2.1 | -1.35348 | 5.991137 | 0.000902 | 0.005814 | 1598 | 3812  | 1982  | 3353  | 4462  | 2523  |
| Solyc09g010850.2.1 | -1.35343 | 6.284524 | 0.001562 | 0.009251 | 2546 | 4254  | 1968  | 4468  | 5147  | 2986  |
| Solyc01g068390.2.1 | -1.34928 | 6.566851 | 0.001228 | 0.007544 | 2535 | 5251  | 3060  | 5127  | 6890  | 3508  |
| Solyc09g064470.2.1 | -1.34914 | 5.518006 | 0.000967 | 0.006159 | 1079 | 2610  | 1613  | 3089  | 2681  | 1572  |
| Solyc10g055650.1.1 | -1.34895 | 5.872635 | 0.001169 | 0.007251 | 1819 | 2667  | 1947  | 3590  | 3624  | 2190  |
| Solyc10g079080.1.1 | -1.34654 | 6.482655 | 0.001712 | 0.009986 | 2905 | 4203  | 2740  | 5521  | 5843  | 3125  |
| Solyc06g082490.2.1 | -1.34646 | 5.731262 | 0.000799 | 0.005259 | 1330 | 2903  | 1858  | 3043  | 3740  | 1892  |
| Solyc10g007390.2.1 | -1.34629 | 8.075251 | 0.001668 | 0.009762 | 6850 | 14619 | 9404  | 13379 | 20328 | 10530 |
| Solyc05g055070.2.1 | -1.3441  | 6.246713 | 0.001321 | 0.008027 | 2491 | 3422  | 2399  | 3949  | 4943  | 3261  |
| Solyc01g112040.2.1 | -1.34164 | 4.973701 | 0.000449 | 0.003228 | 890  | 1638  | 1028  | 1644  | 2509  | 1069  |
| Solyc07g007050.1.1 | -1.34154 | 3.748723 | 0.001275 | 0.007788 | 350  | 793   | 417   | 566   | 1029  | 593   |
| Solyc04g051820.2.1 | -1.33984 | 5.13666  | 0.000439 | 0.003164 | 988  | 2042  | 1032  | 1771  | 2703  | 1314  |
| Solyc09g008290.2.1 | -1.33719 | 4.045438 | 0.000912 | 0.005879 | 484  | 839   | 536   | 953   | 947   | 701   |
| Solyc07g052640.2.1 | -1.33624 | 4.793746 | 0.001029 | 0.006493 | 945  | 1407  | 742   | 1804  | 1583  | 1018  |
| Solyc02g078320.1.1 | -1.33564 | 4.873874 | 0.00066  | 0.00447  | 680  | 1635  | 1086  | 1833  | 1809  | 1058  |
| Solyc05g046300.2.1 | -1.33483 | 5.315315 | 0.00057  | 0.003934 | 1258 | 2080  | 1153  | 1874  | 3270  | 1467  |
| Solyc06g068960.1.1 | -1.33403 | 4.556999 | 0.00162  | 0.009519 | 644  | 1536  | 609   | 831   | 1616  | 1275  |
| Solyc01g057460.2.1 | -1.33129 | 5.167216 | 0.000532 | 0.003717 | 1041 | 1879  | 1162  | 2127  | 2406  | 1281  |
| Solyc01g068000.2.1 | -1.32994 | 5.300207 | 0.000549 | 0.003815 | 1279 | 2029  | 1127  | 2065  | 2748  | 1558  |
| Solyc01g096460.2.1 | -1.32963 | 4.246218 | 0.001413 | 0.008505 | 645  | 908   | 550   | 1223  | 1134  | 672   |
| Solyc08g067480.2.1 | -1.32923 | 5.08745  | 0.000543 | 0.003781 | 838  | 1856  | 1235  | 1364  | 2625  | 1537  |
| Solyc08g066680.2.1 | -1.32793 | 5.767898 | 0.001376 | 0.008323 | 1163 | 3335  | 1978  | 2999  | 3318  | 2316  |
| Solyc03g097020.2.1 | -1.32458 | 5.760224 | 0.001602 | 0.00944  | 1147 | 3526  | 1856  | 2985  | 4107  | 1831  |
| Solyc12g042570.1.1 | -1.32378 | 4.056244 | 0.001179 | 0.007298 | 467  | 1064  | 437   | 860   | 1052  | 726   |
| Solyc05g053230.2.1 | -1.32367 | 6.519731 | 0.001612 | 0.00949  | 2687 | 4948  | 2876  | 3932  | 7167  | 3889  |
| Solyc01g100660.2.1 | -1.32166 | 6.185751 | 0.001407 | 0.008482 | 1915 | 3831  | 2617  | 4062  | 4278  | 3128  |
| Solyc07g051940.2.1 | -1.32116 | 4.884142 | 0.001038 | 0.006535 | 977  | 1781  | 668   | 1540  | 1916  | 1250  |
| Solyc04g024710.2.1 | -1.31841 | 4.818824 | 0.000667 | 0.00451  | 844  | 1380  | 959   | 1725  | 1816  | 995   |
| Solyc04g009310.2.1 | -1.31771 | 4.892189 | 0.00059  | 0.004056 | 937  | 1323  | 1032  | 1569  | 2116  | 1128  |



|                    |          |          |          |          |      |       |      |      |      |      |
|--------------------|----------|----------|----------|----------|------|-------|------|------|------|------|
| Solyc03g006000.2.1 | -1.31689 | 5.047342 | 0.000684 | 0.004606 | 1117 | 1656  | 943  | 1899 | 2158 | 1247 |
| Solyc12g005570.1.1 | -1.31503 | 5.439217 | 0.000827 | 0.005407 | 984  | 2277  | 1772 | 2163 | 2675 | 1994 |
| Solyc04g077600.2.1 | -1.31362 | 5.095482 | 0.000513 | 0.003597 | 967  | 1871  | 1112 | 1950 | 2231 | 1298 |
| Solyc02g031830.1.1 | -1.31121 | 5.539416 | 0.001582 | 0.009339 | 1708 | 2108  | 1312 | 2830 | 3134 | 1562 |
| Solyc01g098210.2.1 | -1.30842 | 4.425761 | 0.000999 | 0.006334 | 736  | 990   | 664  | 1215 | 1462 | 786  |
| Solyc03g095510.2.1 | -1.30659 | 6.022518 | 0.001708 | 0.009969 | 1479 | 3479  | 2636 | 3407 | 4978 | 2279 |
| Solyc11g062390.1.1 | -1.30278 | 4.659121 | 0.001087 | 0.006803 | 867  | 1200  | 763  | 1415 | 1881 | 838  |
| Solyc05g006690.2.1 | -1.30261 | 5.78949  | 0.001181 | 0.007303 | 1558 | 2799  | 1985 | 2847 | 3956 | 2137 |
| Solyc06g050730.2.1 | -1.30187 | 4.196343 | 0.001053 | 0.006614 | 586  | 935   | 566  | 880  | 1448 | 678  |
| Solyc05g009010.1.1 | -1.29993 | 4.290863 | 0.001655 | 0.009693 | 501  | 1417  | 493  | 1026 | 1293 | 800  |
| Solyc07g042590.2.1 | -1.29279 | 5.570799 | 0.001471 | 0.008798 | 1699 | 2104  | 1475 | 2445 | 2820 | 2161 |
| Solyc12g005760.1.1 | -1.28698 | 4.379037 | 0.001484 | 0.008863 | 686  | 1134  | 586  | 1267 | 1188 | 808  |
| Solyc06g082120.2.1 | -1.28046 | 5.519176 | 0.001456 | 0.00873  | 1548 | 2184  | 1467 | 2805 | 2947 | 1577 |
| Solyc01g010940.2.1 | -1.28025 | 5.738303 | 0.001356 | 0.008217 | 1383 | 2838  | 2039 | 2739 | 3760 | 2074 |
| Solyc05g008100.1.1 | -1.27967 | 5.027318 | 0.000929 | 0.005973 | 835  | 1874  | 1168 | 2049 | 1964 | 1152 |
| Solyc01g100410.2.1 | -1.27633 | 4.809826 | 0.000729 | 0.004867 | 835  | 1548  | 905  | 1458 | 1965 | 1076 |
| Solyc01g010150.2.1 | -1.27505 | 4.167407 | 0.001646 | 0.009649 | 415  | 1095  | 662  | 1071 | 1040 | 703  |
| Solyc05g018610.1.1 | -1.27334 | 5.390937 | 0.00081  | 0.005316 | 1174 | 2231  | 1509 | 1865 | 3133 | 1754 |
| Solyc07g008080.2.1 | -1.27096 | 5.62785  | 0.00121  | 0.007451 | 1472 | 2672  | 1648 | 2802 | 3327 | 1784 |
| Solyc12g055750.1.1 | -1.26824 | 4.877011 | 0.000997 | 0.006324 | 774  | 1611  | 1092 | 1744 | 1726 | 1138 |
| Solyc07g048030.2.1 | -1.26809 | 4.499523 | 0.001003 | 0.006356 | 647  | 1243  | 775  | 1147 | 1721 | 807  |
| Solyc10g078570.1.1 | -1.26602 | 4.33565  | 0.001129 | 0.007034 | 526  | 1063  | 787  | 990  | 1494 | 771  |
| Solyc09g008410.2.1 | -1.26559 | 5.3935   | 0.000993 | 0.006304 | 1355 | 2042  | 1430 | 2037 | 3231 | 1558 |
| Solyc09g097870.2.1 | -1.26242 | 4.795681 | 0.001542 | 0.009164 | 668  | 1410  | 1191 | 1712 | 1843 | 897  |
| Solyc07g065140.2.1 | -1.2624  | 4.779663 | 0.00089  | 0.005749 | 795  | 1461  | 969  | 1545 | 1791 | 1026 |
| Solyc02g091520.2.1 | -1.25792 | 4.578637 | 0.00145  | 0.008703 | 544  | 1560  | 846  | 1135 | 1510 | 1088 |
| Solyc02g065650.1.1 | -1.25699 | 4.33434  | 0.001339 | 0.008126 | 657  | 1026  | 656  | 1098 | 1351 | 759  |
| Solyc04g072010.2.1 | -1.256   | 5.436118 | 0.001188 | 0.007343 | 1417 | 2349  | 1311 | 2360 | 2919 | 1618 |
| Solyc04g072120.2.1 | -1.25252 | 5.438624 | 0.001581 | 0.009337 | 1536 | 2028  | 1384 | 2504 | 2810 | 1569 |
| Solyc03g031750.1.1 | -1.25165 | 4.662754 | 0.001075 | 0.006731 | 782  | 1391  | 819  | 1307 | 1807 | 945  |
| Solyc08g082920.2.1 | -1.25115 | 4.610221 | 0.001195 | 0.007382 | 803  | 1278  | 770  | 1288 | 1658 | 937  |
| Solyc04g072110.2.1 | -1.24994 | 5.411472 | 0.001154 | 0.007167 | 1116 | 2190  | 1721 | 2287 | 2761 | 1674 |
| Solyc09g059520.2.1 | -1.24181 | 5.099812 | 0.000943 | 0.006044 | 993  | 1975  | 1150 | 1810 | 2302 | 1323 |
| Solyc04g015580.2.1 | -1.23842 | 4.639097 | 0.001353 | 0.008199 | 646  | 1461  | 916  | 1418 | 1634 | 897  |
| Solyc12g095790.1.1 | -1.23789 | 5.254634 | 0.001201 | 0.007412 | 1171 | 1986  | 1343 | 2145 | 2524 | 1386 |
| Solyc05g011930.2.1 | -1.23377 | 4.864596 | 0.001563 | 0.009256 | 953  | 1799  | 776  | 1436 | 2155 | 1085 |
| Solyc11g017170.1.1 | -1.23285 | 4.61359  | 0.001615 | 0.0095   | 810  | 1329  | 758  | 1389 | 1664 | 847  |
| Solyc12g015740.1.1 | -1.22904 | 4.914587 | 0.001151 | 0.00715  | 833  | 1577  | 1183 | 1568 | 1947 | 1218 |
| Solyc10g018160.1.1 | -1.22091 | 4.606459 | 0.001477 | 0.008832 | 707  | 1430  | 823  | 1316 | 1474 | 995  |
| Solyc03g116600.2.1 | -1.21265 | 4.417436 | 0.001559 | 0.009238 | 608  | 1201  | 780  | 1115 | 1488 | 787  |
| Solyc02g091430.2.1 | -1.20617 | 5.336623 | 0.001617 | 0.009507 | 1372 | 2129  | 1307 | 1990 | 2614 | 1697 |
| Solyc02g081380.2.1 | -1.20457 | 5.460853 | 0.00167  | 0.009774 | 1261 | 2375  | 1684 | 2333 | 2883 | 1695 |
| Solyc01g010860.2.1 | -1.20004 | 4.891828 | 0.001409 | 0.008494 | 816  | 1783  | 1067 | 1539 | 1984 | 1142 |
| Solyc07g005430.2.1 | -1.19684 | 5.352557 | 0.001679 | 0.009818 | 1314 | 2015  | 1520 | 2090 | 2698 | 1611 |
| Solyc02g094170.2.1 | -1.18263 | 4.766269 | 0.001708 | 0.009969 | 855  | 1503  | 954  | 1355 | 1808 | 1086 |
| Solyc07g066290.2.1 | 1.203968 | 4.670867 | 0.001675 | 0.009796 | 1655 | 3245  | 2218 | 481  | 750  | 494  |
| Solyc01g096600.2.1 | 1.20448  | 4.963488 | 0.001633 | 0.009583 | 1761 | 4776  | 2540 | 657  | 989  | 509  |
| Solyc03g121260.2.1 | 1.218071 | 4.796395 | 0.001315 | 0.007997 | 1890 | 3709  | 2229 | 509  | 882  | 505  |
| Solyc05g005640.2.1 | 1.226305 | 5.033718 | 0.001494 | 0.008915 | 1751 | 4765  | 2984 | 594  | 976  | 631  |
| Solyc12g100200.1.1 | 1.236993 | 5.118574 | 0.001258 | 0.0077   | 2381 | 4218  | 3068 | 878  | 1890 | 542  |
| Solyc10g085460.1.1 | 1.238917 | 5.351327 | 0.00126  | 0.007709 | 2862 | 5531  | 3166 | 707  | 1308 | 748  |
| Solyc02g070670.2.1 | 1.244963 | 5.141868 | 0.001509 | 0.008996 | 1729 | 5209  | 3401 | 765  | 973  | 608  |
| Solyc03g121440.2.1 | 1.254271 | 4.844257 | 0.001173 | 0.007268 | 2130 | 3206  | 2540 | 505  | 873  | 536  |
| Solyc07g005030.2.1 | 1.26449  | 4.690706 | 0.001119 | 0.006988 | 1471 | 3675  | 2341 | 611  | 711  | 390  |
| Solyc06g076770.2.1 | 1.266082 | 5.043502 | 0.001266 | 0.007742 | 2435 | 3690  | 2945 | 504  | 1059 | 635  |
| Solyc08g014470.2.1 | 1.267657 | 4.290994 | 0.001555 | 0.00922  | 1132 | 2483  | 1947 | 449  | 587  | 277  |
| Solyc05g053710.2.1 | 1.274266 | 4.234884 | 0.001139 | 0.00709  | 1291 | 2510  | 1550 | 379  | 514  | 336  |
| Solyc03g007920.2.1 | 1.274401 | 5.075197 | 0.001229 | 0.007549 | 1669 | 4512  | 3570 | 630  | 1063 | 560  |
| Solyc12g056740.1.1 | 1.275417 | 5.456007 | 0.000938 | 0.006017 | 2614 | 6399  | 3774 | 877  | 1299 | 732  |
| Solyc06g008960.2.1 | 1.276088 | 4.328207 | 0.001595 | 0.009405 | 1072 | 2983  | 1840 | 333  | 617  | 376  |
| Solyc03g116350.2.1 | 1.280911 | 4.8288   | 0.000776 | 0.005133 | 1943 | 3867  | 2312 | 667  | 709  | 465  |
| Solyc04g040190.1.1 | 1.282973 | 4.90987  | 0.000752 | 0.004999 | 1851 | 4193  | 2638 | 671  | 887  | 439  |
| Solyc06g009220.2.1 | 1.287889 | 4.54145  | 0.001463 | 0.008764 | 1672 | 2908  | 1968 | 637  | 565  | 312  |
| Solyc01g089870.2.1 | 1.300096 | 5.13515  | 0.001197 | 0.007392 | 1770 | 5370  | 3306 | 550  | 1156 | 621  |
| Solyc04g079060.2.1 | 1.301145 | 4.369305 | 0.001408 | 0.008489 | 1172 | 2819  | 1994 | 538  | 526  | 278  |
| Solyc10g081720.1.1 | 1.301999 | 4.528618 | 0.001307 | 0.007955 | 2009 | 2351  | 1870 | 532  | 655  | 327  |
| Solyc07g053610.2.1 | 1.302658 | 5.86203  | 0.001444 | 0.008667 | 4147 | 8391  | 4294 | 1037 | 1626 | 1089 |
| Solyc04g014500.2.1 | 1.309704 | 5.148371 | 0.001611 | 0.009484 | 1933 | 5277  | 3263 | 463  | 1276 | 630  |
| Solyc02g089340.2.1 | 1.311443 | 4.007041 | 0.00117  | 0.007251 | 926  | 2518  | 1332 | 313  | 464  | 266  |
| Solyc03g113350.2.1 | 1.314109 | 4.665403 | 0.001403 | 0.008466 | 2377 | 2845  | 1698 | 598  | 637  | 390  |
| Solyc05g054940.2.1 | 1.317893 | 4.148766 | 0.001651 | 0.009675 | 921  | 2366  | 1863 | 391  | 386  | 327  |
| Solyc11g065870.1.1 | 1.31915  | 4.398324 | 0.000901 | 0.005813 | 1812 | 2560  | 1492 | 433  | 566  | 352  |
| Solyc07g045420.2.1 | 1.3221   | 6.181179 | 0.00141  | 0.008496 | 4318 | 10486 | 6482 | 1420 | 2303 | 1063 |
| Solyc07g017800.2.1 | 1.322671 | 5.027489 | 0.001462 | 0.008763 | 3217 | 3614  | 2027 | 693  | 1037 | 430  |
| Solyc03g005870.2.1 | 1.322703 | 3.689467 | 0.001591 | 0.009386 | 775  | 1666  | 1260 | 235  | 358  | 231  |
| Solyc03g083360.2.1 | 1.324338 | 4.632963 | 0.000806 | 0.005294 | 1360 | 3123  | 2650 | 509  | 695  | 395  |
| Solyc12g088750.1.1 | 1.324527 | 4.421596 | 0.000752 | 0.004999 | 1505 | 2742  | 1850 | 341  | 690  | 369  |
| Solyc01g067550.2.1 | 1.325426 | 4.75703  | 0.000952 | 0.006084 | 1580 | 3487  | 2716 | 396  | 846  | 508  |
| Solyc12g014460.1.1 | 1.326391 | 4.952443 | 0.000503 | 0.003539 | 1806 | 4539  | 2769 | 672  | 807  | 497  |
| Solyc01g009230.2.1 | 1.326679 | 5.297349 | 0.000493 | 0.003479 | 2352 | 5568  | 3574 | 759  | 1088 | 672  |
| Solyc09g098330.2.1 | 1.331848 | 4.457627 | 0.001335 | 0.008102 | 1074 | 3266  | 2196 | 331  | 647  | 425  |
| Solyc11g010490.1.1 | 1.33201  | 4.014366 | 0.00122  | 0.007505 | 871  | 2285  | 1586 | 278  | 453  | 297  |
| Solyc06g073740.2.1 | 1.332779 | 5.511392 | 0.000922 | 0.005934 | 2555 | 5785  | 4806 | 839  | 1515 | 660  |
| Solyc02g081850.2.1 | 1.334281 | 4.93404  | 0.000995 | 0.006315 | 2866 | 3141  | 2258 | 692  | 739  | 495  |

|                    |          |          |          |          |       |       |       |      |      |      |
|--------------------|----------|----------|----------|----------|-------|-------|-------|------|------|------|
| Solyc01g008480.2.1 | 1.33625  | 3.758215 | 0.00129  | 0.00787  | 835   | 2036  | 1120  | 304  | 365  | 197  |
| Solyc04g082680.2.1 | 1.337433 | 4.657233 | 0.000986 | 0.006266 | 1664  | 3395  | 2224  | 340  | 782  | 495  |
| Solyc09g007310.2.1 | 1.338927 | 4.706276 | 0.000717 | 0.004802 | 1436  | 3686  | 2546  | 589  | 597  | 441  |
| Solyc02g021140.2.1 | 1.339624 | 4.601656 | 0.001298 | 0.007911 | 1175  | 3443  | 2558  | 360  | 775  | 435  |
| Solyc01g068270.2.1 | 1.341821 | 4.32969  | 0.001125 | 0.007016 | 1427  | 2038  | 2074  | 432  | 440  | 367  |
| Solyc12g007090.1.1 | 1.342781 | 4.325806 | 0.001023 | 0.006464 | 1571  | 2290  | 1722  | 448  | 414  | 366  |
| Solyc11g005020.1.1 | 1.343081 | 5.156035 | 0.000397 | 0.002909 | 2227  | 5174  | 3072  | 686  | 1029 | 572  |
| Solyc02g069080.2.1 | 1.344586 | 4.096938 | 0.000741 | 0.004933 | 1054  | 2316  | 1594  | 298  | 489  | 301  |
| Solyc02g070260.2.1 | 1.345006 | 5.175382 | 0.001326 | 0.008057 | 1610  | 5172  | 3964  | 819  | 778  | 631  |
| Solyc12g015680.1.1 | 1.347512 | 4.534626 | 0.000855 | 0.005563 | 1829  | 2592  | 2017  | 578  | 608  | 296  |
| Solyc09g018790.2.1 | 1.349853 | 5.501104 | 0.000514 | 0.003602 | 3397  | 5508  | 3894  | 974  | 1159 | 722  |
| Solyc03g006420.2.1 | 1.351821 | 4.495257 | 0.000508 | 0.003567 | 1509  | 3235  | 1848  | 387  | 638  | 402  |
| Solyc01g068610.2.1 | 1.351958 | 5.799603 | 0.001545 | 0.009175 | 2934  | 7800  | 5686  | 1393 | 1311 | 793  |
| Solyc01g080810.2.1 | 1.354829 | 5.223907 | 0.00042  | 0.00305  | 2416  | 5000  | 3411  | 835  | 1026 | 525  |
| Solyc01g102970.2.1 | 1.35795  | 4.775041 | 0.000477 | 0.003393 | 1693  | 3984  | 2391  | 429  | 867  | 464  |
| Solyc07g040940.2.1 | 1.361534 | 5.084532 | 0.000284 | 0.002195 | 2383  | 4497  | 2899  | 701  | 874  | 551  |
| Solyc11g069290.1.1 | 1.36986  | 5.081146 | 0.000401 | 0.002929 | 2474  | 3998  | 3098  | 521  | 1031 | 596  |
| Solyc06g083770.2.1 | 1.37009  | 3.683101 | 0.001055 | 0.006623 | 977   | 1515  | 1122  | 234  | 338  | 226  |
| Solyc01g102540.2.1 | 1.370274 | 4.69615  | 0.001638 | 0.009611 | 1005  | 4536  | 2533  | 413  | 814  | 430  |
| Solyc07g045310.2.1 | 1.370721 | 4.438678 | 0.001482 | 0.008861 | 2171  | 2017  | 1602  | 515  | 541  | 302  |
| Solyc01g091860.2.1 | 1.373468 | 3.675494 | 0.00163  | 0.00957  | 881   | 1746  | 1078  | 179  | 341  | 265  |
| Solyc02g090380.2.1 | 1.375008 | 3.900087 | 0.001217 | 0.007491 | 863   | 2334  | 1282  | 373  | 353  | 202  |
| Solyc04g014870.2.1 | 1.377392 | 4.277525 | 0.00058  | 0.003993 | 1231  | 2647  | 1780  | 416  | 426  | 337  |
| Solyc11g011250.1.1 | 1.377775 | 4.909344 | 0.000637 | 0.00434  | 1526  | 4442  | 3022  | 462  | 851  | 561  |
| Solyc12g062480.1.1 | 1.378472 | 3.456771 | 0.001542 | 0.009164 | 701   | 1492  | 1003  | 222  | 331  | 148  |
| Solyc07g006140.2.1 | 1.37975  | 4.468038 | 0.000535 | 0.003735 | 1838  | 2677  | 1719  | 510  | 592  | 293  |
| Solyc03g043600.1.1 | 1.380026 | 3.917542 | 0.000756 | 0.005016 | 916   | 2328  | 1271  | 267  | 443  | 243  |
| Solyc02g068240.2.1 | 1.380663 | 5.322686 | 0.000613 | 0.004194 | 3534  | 4518  | 3064  | 975  | 919  | 576  |
| Solyc02g069830.2.1 | 1.382347 | 3.656143 | 0.001227 | 0.007537 | 1082  | 1525  | 932   | 252  | 316  | 209  |
| Solyc01g096900.2.1 | 1.385109 | 5.008784 | 0.000832 | 0.005432 | 1366  | 5236  | 3280  | 538  | 971  | 526  |
| Solyc04g076850.2.1 | 1.389286 | 7.224018 | 0.001133 | 0.007058 | 10420 | 20717 | 12545 | 2631 | 4143 | 2540 |
| Solyc02g091240.1.1 | 1.389418 | 4.921968 | 0.000318 | 0.002417 | 2097  | 3786  | 2818  | 479  | 836  | 560  |
| Solyc12g010330.1.1 | 1.390095 | 4.003399 | 0.000893 | 0.005767 | 890   | 2176  | 1647  | 244  | 452  | 297  |
| Solyc11g022460.1.1 | 1.390284 | 3.962136 | 0.00114  | 0.007094 | 866   | 2225  | 1529  | 214  | 493  | 276  |
| Solyc12g049400.1.1 | 1.397121 | 4.886548 | 0.001368 | 0.008278 | 2543  | 3250  | 2429  | 790  | 834  | 267  |
| Solyc08g082090.1.1 | 1.399776 | 5.182617 | 0.001693 | 0.009887 | 2389  | 7412  | 1718  | 584  | 1081 | 608  |
| Solyc07g066670.2.1 | 1.400681 | 4.881292 | 0.00118  | 0.007303 | 1268  | 5094  | 2811  | 404  | 988  | 485  |
| Solyc05g006900.1.1 | 1.401235 | 4.433742 | 0.001088 | 0.006805 | 1248  | 3732  | 1666  | 264  | 685  | 404  |
| Solyc09g092330.1.1 | 1.402961 | 5.968493 | 0.000793 | 0.005228 | 3636  | 9644  | 5577  | 1000 | 2005 | 969  |
| Solyc08g076470.2.1 | 1.405105 | 4.683783 | 0.000968 | 0.006161 | 2080  | 3078  | 2118  | 641  | 769  | 238  |
| Solyc07g064950.2.1 | 1.405909 | 4.858557 | 0.000325 | 0.002464 | 1745  | 3952  | 2835  | 449  | 833  | 513  |
| Solyc12g010740.1.1 | 1.406273 | 3.518072 | 0.000967 | 0.006161 | 739   | 1657  | 989   | 222  | 311  | 175  |
| Solyc04g014210.2.1 | 1.407662 | 5.219575 | 0.000288 | 0.00222  | 2353  | 5661  | 3136  | 628  | 953  | 684  |
| Solyc10g076860.1.1 | 1.41008  | 3.496406 | 0.001186 | 0.007333 | 639   | 1631  | 1087  | 223  | 289  | 178  |
| Solyc08g063040.2.1 | 1.411035 | 5.009917 | 0.000949 | 0.00607  | 3373  | 3441  | 1984  | 737  | 766  | 464  |
| Solyc03g019940.2.1 | 1.411192 | 5.147812 | 0.000481 | 0.003417 | 1672  | 5361  | 3708  | 649  | 896  | 612  |
| Solyc11g065180.1.1 | 1.411704 | 4.397708 | 0.001055 | 0.006623 | 1018  | 3389  | 2042  | 271  | 635  | 397  |
| Solyc04g080770.2.1 | 1.415317 | 4.013741 | 0.000612 | 0.004188 | 870   | 2216  | 1696  | 295  | 406  | 278  |
| Solyc02g083180.2.1 | 1.417389 | 4.871877 | 0.000582 | 0.004011 | 1444  | 4639  | 2856  | 449  | 726  | 580  |
| Solyc01g111600.2.1 | 1.417809 | 5.415148 | 0.000815 | 0.005341 | 3973  | 4637  | 3206  | 1089 | 865  | 603  |
| Solyc03g033420.2.1 | 1.418037 | 4.49097  | 0.000616 | 0.004209 | 1123  | 3073  | 2486  | 345  | 651  | 390  |
| Solyc03g120670.2.1 | 1.419485 | 5.012553 | 0.000213 | 0.001716 | 2192  | 4294  | 2932  | 555  | 766  | 609  |
| Solyc04g063230.2.1 | 1.420651 | 5.023761 | 0.000777 | 0.005138 | 1747  | 4431  | 3465  | 822  | 907  | 320  |
| Solyc11g068720.1.1 | 1.421429 | 3.68457  | 0.001159 | 0.007198 | 749   | 1792  | 1264  | 174  | 415  | 215  |
| Solyc03g116670.2.1 | 1.424771 | 7.408245 | 0.001107 | 0.006922 | 11051 | 26506 | 13640 | 3632 | 3787 | 2753 |
| Solyc09g011170.2.1 | 1.42542  | 5.814551 | 0.00065  | 0.004418 | 3349  | 6727  | 6209  | 1057 | 1669 | 789  |
| Solyc07g018000.2.1 | 1.42597  | 3.571784 | 0.001393 | 0.008409 | 597   | 1980  | 1083  | 186  | 346  | 199  |
| Solyc09g083410.2.1 | 1.426957 | 4.290635 | 0.000441 | 0.003181 | 1258  | 2449  | 1966  | 409  | 404  | 341  |
| Solyc09g074330.2.1 | 1.429964 | 3.927191 | 0.001366 | 0.008267 | 755   | 2643  | 1333  | 197  | 474  | 269  |
| Solyc05g013300.1.1 | 1.430059 | 4.32249  | 0.000621 | 0.00424  | 1935  | 2276  | 1355  | 367  | 502  | 337  |
| Solyc06g011530.2.1 | 1.430361 | 3.427431 | 0.001119 | 0.006986 | 794   | 1367  | 938   | 191  | 337  | 146  |
| Solyc03g114510.2.1 | 1.431165 | 3.866203 | 0.000878 | 0.005688 | 942   | 1962  | 1372  | 374  | 307  | 192  |
| Solyc01g005020.2.1 | 1.433599 | 6.156485 | 0.001201 | 0.007412 | 3124  | 10648 | 7939  | 1255 | 2031 | 1105 |
| Solyc02g093970.2.1 | 1.437186 | 4.524168 | 0.000267 | 0.002081 | 1871  | 3097  | 1702  | 483  | 619  | 310  |
| Solyc08g076720.2.1 | 1.438048 | 3.879084 | 0.000953 | 0.006089 | 1227  | 2062  | 995   | 347  | 399  | 164  |
| Solyc02g091840.2.1 | 1.43955  | 6.361617 | 0.000796 | 0.005244 | 4969  | 11957 | 7685  | 1157 | 2505 | 1404 |
| Solyc07g063570.2.1 | 1.444919 | 5.378232 | 0.000493 | 0.003479 | 3211  | 5289  | 3510  | 1118 | 859  | 506  |
| Solyc07g021550.2.1 | 1.44606  | 3.934118 | 0.000946 | 0.00605  | 786   | 2303  | 1542  | 207  | 420  | 290  |
| Solyc05g048810.2.1 | 1.446302 | 3.464022 | 0.00166  | 0.009717 | 516   | 2018  | 947   | 195  | 309  | 168  |
| Solyc01g010270.2.1 | 1.446762 | 4.015355 | 0.00158  | 0.009337 | 598   | 2660  | 1780  | 262  | 500  | 239  |
| Solyc04g009510.2.1 | 1.449877 | 4.486732 | 0.001581 | 0.009339 | 2480  | 2129  | 1424  | 555  | 506  | 283  |
| Solyc01g094290.2.1 | 1.452363 | 6.215882 | 0.000718 | 0.004809 | 4545  | 10834 | 6909  | 1015 | 2257 | 1276 |
| Solyc09g074410.2.1 | 1.453386 | 3.396127 | 0.001691 | 0.009876 | 712   | 1205  | 1093  | 204  | 197  | 201  |
| Solyc05g018210.2.1 | 1.454206 | 4.552209 | 0.001649 | 0.009663 | 1695  | 3092  | 2060  | 738  | 405  | 238  |
| Solyc08g077510.2.1 | 1.455212 | 4.873423 | 0.0002   | 0.00163  | 2494  | 3178  | 2549  | 568  | 814  | 407  |
| Solyc05g009760.1.1 | 1.457546 | 3.738003 | 0.000493 | 0.003479 | 1027  | 1635  | 1169  | 284  | 308  | 199  |
| Solyc11g008910.1.1 | 1.459375 | 3.33562  | 0.001099 | 0.006873 | 777   | 1222  | 892   | 166  | 258  | 175  |
| Solyc02g086550.2.1 | 1.463407 | 4.059391 | 0.000258 | 0.00202  | 1255  | 2213  | 1395  | 276  | 425  | 288  |
| Solyc10g083520.1.1 | 1.466213 | 4.862833 | 0.000201 | 0.001636 | 1788  | 4458  | 2567  | 416  | 807  | 518  |
| Solyc03g119400.2.1 | 1.46837  | 4.275839 | 0.000438 | 0.003161 | 975   | 3067  | 1911  | 330  | 614  | 255  |
| Solyc03g026150.2.1 | 1.468428 | 4.047469 | 0.000213 | 0.001716 | 1130  | 2307  | 1458  | 315  | 406  | 259  |
| Solyc03g034020.2.1 | 1.468891 | 4.737477 | 0.000121 | 0.001067 | 1827  | 3854  | 2272  | 477  | 750  | 389  |
| Solyc05g005180.2.1 | 1.468901 | 3.971719 | 0.000645 | 0.004393 | 1359  | 1691  | 1345  | 351  | 301  | 252  |
| Solyc10g081040.1.1 | 1.470295 | 5.300299 | 0.000669 | 0.004518 | 2622  | 7731  | 2162  | 617  | 1275 | 549  |

|                    |          |          |          |          |       |       |       |      |      |      |
|--------------------|----------|----------|----------|----------|-------|-------|-------|------|------|------|
| Solyc06g075390.2.1 | 1.47098  | 3.976016 | 0.000535 | 0.003734 | 1053  | 2442  | 1260  | 383  | 387  | 177  |
| Solyc07g045190.1.1 | 1.471684 | 3.825771 | 0.000515 | 0.003606 | 1105  | 1583  | 1334  | 261  | 304  | 254  |
| Solyc06g082750.2.1 | 1.471738 | 4.43986  | 0.000883 | 0.005709 | 1273  | 2692  | 2395  | 535  | 328  | 359  |
| Solyc01g111400.2.1 | 1.472035 | 5.671429 | 0.00065  | 0.004414 | 4518  | 6342  | 3737  | 669  | 1804 | 724  |
| Solyc01g011510.2.1 | 1.472581 | 5.315259 | 0.000663 | 0.004488 | 3365  | 5413  | 2830  | 1025 | 1061 | 357  |
| Solyc01g008180.2.1 | 1.472627 | 3.444138 | 0.00089  | 0.00575  | 803   | 1384  | 971   | 176  | 353  | 144  |
| Solyc03g032150.2.1 | 1.472986 | 3.796605 | 0.00049  | 0.00347  | 808   | 2051  | 1331  | 229  | 437  | 189  |
| Solyc03g121050.2.1 | 1.473069 | 3.623172 | 0.000628 | 0.004285 | 911   | 1549  | 1109  | 187  | 308  | 227  |
| Solyc03g007600.2.1 | 1.476871 | 5.835337 | 0.000552 | 0.003833 | 5092  | 6585  | 4494  | 1321 | 1366 | 719  |
| Solyc12g017420.1.1 | 1.477046 | 4.451296 | 0.000146 | 0.001245 | 1521  | 2981  | 1955  | 441  | 486  | 349  |
| Solyc01g090200.2.1 | 1.477054 | 5.01162  | 0.000147 | 0.00125  | 2114  | 4345  | 3082  | 733  | 825  | 385  |
| Solyc07g055290.2.1 | 1.477909 | 4.33642  | 0.000178 | 0.001473 | 1304  | 2890  | 1843  | 316  | 571  | 325  |
| Solyc12g009150.1.1 | 1.478001 | 5.093106 | 0.000126 | 0.001098 | 1986  | 5011  | 3310  | 575  | 867  | 574  |
| Solyc11g032200.1.1 | 1.478331 | 3.163782 | 0.001215 | 0.007478 | 622   | 1164  | 832   | 181  | 213  | 133  |
| Solyc01g099110.2.1 | 1.478566 | 5.223833 | 0.000334 | 0.002523 | 3527  | 4532  | 2558  | 855  | 822  | 518  |
| Solyc03g113370.2.1 | 1.47918  | 3.777688 | 0.000932 | 0.005988 | 804   | 2231  | 1177  | 161  | 407  | 252  |
| Solyc05g051680.2.1 | 1.479637 | 4.195551 | 0.000337 | 0.002542 | 1715  | 2225  | 1265  | 337  | 476  | 277  |
| Solyc02g085780.2.1 | 1.482284 | 4.898943 | 0.000293 | 0.002251 | 1795  | 4114  | 2994  | 371  | 835  | 561  |
| Solyc01g109850.2.1 | 1.482429 | 6.421282 | 0.000341 | 0.002568 | 6155  | 11288 | 7725  | 1687 | 2129 | 1265 |
| Solyc01g094830.2.1 | 1.483016 | 4.085874 | 0.000717 | 0.004803 | 1006  | 2361  | 1706  | 192  | 468  | 338  |
| Solyc10g051200.1.1 | 1.484824 | 4.677545 | 0.000354 | 0.002635 | 1663  | 3704  | 2305  | 674  | 527  | 299  |
| Solyc09g064270.2.1 | 1.485812 | 4.265156 | 0.000553 | 0.003837 | 1039  | 2892  | 1921  | 234  | 556  | 353  |
| Solyc01g105670.2.1 | 1.485935 | 4.17183  | 0.000222 | 0.001775 | 1197  | 2305  | 1782  | 385  | 388  | 273  |
| Solyc07g065260.2.1 | 1.486481 | 4.706125 | 0.000483 | 0.003427 | 1361  | 4149  | 2533  | 310  | 849  | 431  |
| Solyc01g079650.2.1 | 1.487354 | 3.716695 | 0.000826 | 0.005403 | 667   | 2383  | 1106  | 267  | 371  | 158  |
| Solyc03g097000.2.1 | 1.487696 | 3.211478 | 0.001437 | 0.008638 | 564   | 1348  | 870   | 127  | 276  | 152  |
| Solyc02g063450.2.1 | 1.487763 | 7.961989 | 0.000917 | 0.005911 | 15624 | 30226 | 27058 | 5661 | 6206 | 3034 |
| Solyc09g010190.2.1 | 1.487775 | 3.818842 | 0.000551 | 0.003825 | 773   | 1986  | 1482  | 201  | 413  | 231  |
| Solyc12g096550.1.1 | 1.490373 | 5.852143 | 0.000489 | 0.003467 | 5109  | 7834  | 3891  | 850  | 1727 | 906  |
| Solyc03g025600.2.1 | 1.492029 | 5.750519 | 0.000346 | 0.002594 | 4415  | 6438  | 4608  | 868  | 1236 | 997  |
| Solyc08g075530.2.1 | 1.492146 | 5.526669 | 0.000353 | 0.002633 | 2300  | 7536  | 4491  | 655  | 1314 | 777  |
| Solyc09g009430.2.1 | 1.492637 | 6.28488  | 0.000368 | 0.00273  | 5629  | 9201  | 7709  | 1418 | 1836 | 1286 |
| Solyc04g049380.2.1 | 1.496252 | 4.255035 | 0.001322 | 0.008034 | 1848  | 2037  | 1438  | 541  | 368  | 201  |
| Solyc03g059070.2.1 | 1.496337 | 3.413999 | 0.001283 | 0.007834 | 687   | 1406  | 1053  | 125  | 332  | 182  |
| Solyc11g008890.1.1 | 1.496389 | 5.323045 | 9.15E-05 | 0.000837 | 3190  | 4933  | 3454  | 762  | 972  | 611  |
| Solyc10g008630.2.1 | 1.49747  | 4.360875 | 0.000218 | 0.001751 | 1342  | 3092  | 1777  | 486  | 445  | 266  |
| Solyc05g050940.2.1 | 1.498346 | 3.016168 | 0.001483 | 0.008861 | 522   | 1057  | 803   | 147  | 234  | 105  |
| Solyc03g113770.2.1 | 1.499244 | 3.877823 | 0.000599 | 0.00411  | 678   | 2469  | 1455  | 241  | 420  | 217  |
| Solyc12g099280.1.1 | 1.500323 | 4.415341 | 0.000252 | 0.001982 | 1411  | 3326  | 1755  | 292  | 724  | 296  |
| Solyc02g093940.2.1 | 1.501286 | 3.547952 | 0.001588 | 0.009375 | 568   | 1831  | 1205  | 142  | 292  | 237  |
| Solyc09g008730.2.1 | 1.501371 | 3.910048 | 0.000246 | 0.001942 | 1099  | 2103  | 1256  | 235  | 415  | 239  |
| Solyc02g091640.2.1 | 1.502032 | 4.425604 | 0.00021  | 0.0017   | 1104  | 3365  | 2152  | 379  | 621  | 291  |
| Solyc08g077890.2.1 | 1.502249 | 6.791764 | 0.000611 | 0.00418  | 6819  | 14862 | 11335 | 2585 | 2430 | 1443 |
| Solyc02g068030.1.1 | 1.503256 | 5.06429  | 0.000278 | 0.002156 | 3384  | 3908  | 2144  | 546  | 983  | 480  |
| Solyc07g019440.2.1 | 1.503731 | 5.101977 | 0.00014  | 0.001206 | 1925  | 5098  | 3428  | 503  | 934  | 583  |
| Solyc08g082400.1.1 | 1.505881 | 4.628266 | 0.001191 | 0.007358 | 2873  | 2481  | 1384  | 553  | 623  | 291  |
| Solyc06g065440.1.1 | 1.506523 | 5.474699 | 0.000519 | 0.00363  | 2028  | 6176  | 5294  | 919  | 848  | 794  |
| Solyc12g006480.1.1 | 1.506634 | 6.014275 | 0.001036 | 0.006529 | 2716  | 11851 | 6160  | 893  | 1971 | 1015 |
| Solyc05g015490.2.1 | 1.507248 | 6.391776 | 0.0004   | 0.002925 | 5449  | 13832 | 6624  | 1613 | 2419 | 1031 |
| Solyc12g068070.1.1 | 1.510169 | 4.594591 | 0.00039  | 0.002866 | 1184  | 3798  | 2491  | 313  | 649  | 444  |
| Solyc01g081050.2.1 | 1.516134 | 4.500872 | 0.000133 | 0.001152 | 1303  | 3772  | 1965  | 386  | 617  | 332  |
| Solyc11g030600.2.1 | 1.516449 | 5.177068 | 0.000183 | 0.001506 | 2629  | 5297  | 2936  | 439  | 1123 | 597  |
| Solyc06g064940.2.1 | 1.516966 | 5.284765 | 0.000256 | 0.00201  | 2072  | 6085  | 3868  | 492  | 1242 | 609  |
| Solyc10g078750.1.1 | 1.519172 | 4.39789  | 0.000307 | 0.002344 | 2131  | 2420  | 1391  | 363  | 589  | 296  |
| Solyc02g088000.2.1 | 1.519936 | 6.815316 | 0.000334 | 0.002523 | 7490  | 16883 | 9793  | 2275 | 2704 | 1573 |
| Solyc05g049900.2.1 | 1.519965 | 3.620472 | 0.000449 | 0.003228 | 782   | 1862  | 1091  | 171  | 352  | 200  |
| Solyc02g081910.1.1 | 1.520568 | 4.146424 | 0.001037 | 0.006532 | 697   | 3025  | 1890  | 249  | 614  | 224  |
| Solyc10g005180.2.1 | 1.520672 | 5.032052 | 0.000264 | 0.002061 | 2431  | 3995  | 3101  | 861  | 704  | 339  |
| Solyc01g087290.2.1 | 1.522294 | 4.151175 | 0.000375 | 0.002767 | 1234  | 2383  | 1650  | 461  | 351  | 206  |
| Solyc08g065150.1.1 | 1.523248 | 3.642632 | 0.000292 | 0.002248 | 812   | 1732  | 1189  | 224  | 313  | 187  |
| Solyc05g026140.2.1 | 1.525585 | 3.285589 | 0.001227 | 0.00754  | 921   | 1137  | 709   | 211  | 245  | 115  |
| Solyc06g062480.2.1 | 1.527847 | 3.878145 | 0.000205 | 0.001666 | 924   | 2224  | 1327  | 237  | 382  | 233  |
| Solyc10g024410.1.1 | 1.528462 | 5.37365  | 7.14E-05 | 0.000679 | 2900  | 5822  | 3688  | 664  | 1192 | 597  |
| Solyc08g067030.2.1 | 1.53162  | 2.960706 | 0.001283 | 0.007834 | 575   | 935   | 747   | 121  | 235  | 106  |
| Solyc12g042770.1.1 | 1.533472 | 6.979052 | 0.000566 | 0.003916 | 11769 | 14158 | 9891  | 2674 | 3164 | 1543 |
| Solyc05g005770.2.1 | 1.533953 | 3.526638 | 0.000395 | 0.002895 | 797   | 1874  | 867   | 209  | 290  | 167  |
| Solyc04g010290.2.1 | 1.534651 | 3.285637 | 0.001365 | 0.008263 | 556   | 1361  | 1022  | 113  | 295  | 164  |
| Solyc11g069500.1.1 | 1.536973 | 3.404883 | 0.000569 | 0.003931 | 825   | 1205  | 1013  | 116  | 263  | 135  |
| Solyc02g036470.2.1 | 1.538325 | 4.520023 | 0.000172 | 0.001431 | 1998  | 2932  | 1743  | 524  | 473  | 305  |
| Solyc09g011710.2.1 | 1.542604 | 7.173376 | 0.001459 | 0.008748 | 5519  | 27635 | 13952 | 2150 | 4408 | 2021 |
| Solyc08g076450.2.1 | 1.542684 | 5.666087 | 0.00165  | 0.009667 | 5172  | 5409  | 3641  | 1498 | 910  | 476  |
| Solyc12g005180.1.1 | 1.543546 | 5.327623 | 0.000438 | 0.003161 | 3227  | 4775  | 3632  | 1120 | 687  | 447  |
| Solyc01g087250.2.1 | 1.545499 | 5.435012 | 0.000179 | 0.001479 | 2771  | 6540  | 3903  | 1073 | 924  | 482  |
| Solyc09g075860.2.1 | 1.546087 | 5.279207 | 0.000387 | 0.002847 | 4030  | 3996  | 2785  | 916  | 749  | 517  |
| Solyc06g076850.2.1 | 1.546211 | 8.404142 | 0.001151 | 0.00715  | 34155 | 36272 | 24732 | 7979 | 7583 | 3928 |
| Solyc04g082400.2.1 | 1.547849 | 6.053406 | 0.00039  | 0.002864 | 3760  | 10924 | 6055  | 1562 | 1310 | 870  |
| Solyc06g073780.2.1 | 1.547961 | 5.876764 | 0.000214 | 0.001724 | 3571  | 9242  | 5323  | 1272 | 1385 | 728  |
| Solyc05g056260.2.1 | 1.548786 | 5.096872 | 7.45E-05 | 0.000704 | 2181  | 4669  | 3425  | 478  | 932  | 564  |
| Solyc03g096800.2.1 | 1.548816 | 5.508518 | 0.000368 | 0.002727 | 4514  | 5793  | 2828  | 1020 | 1146 | 492  |
| Solyc01g104910.2.1 | 1.549323 | 5.352558 | 0.000195 | 0.001597 | 2283  | 7897  | 3011  | 584  | 1117 | 660  |
| Solyc08g006650.2.1 | 1.549386 | 3.079957 | 0.001179 | 0.007298 | 450   | 1301  | 853   | 169  | 213  | 106  |
| Solyc04g015450.2.1 | 1.549841 | 6.32053  | 0.000648 | 0.004408 | 7356  | 9546  | 6080  | 2003 | 1570 | 947  |
| Solyc07g005140.2.1 | 1.549896 | 3.503308 | 0.00168  | 0.009818 | 430   | 1559  | 1482  | 225  | 303  | 134  |
| Solyc09g042740.2.1 | 1.550654 | 4.632139 | 8.25E-05 | 0.000767 | 1640  | 3203  | 2521  | 513  | 531  | 355  |

|                    |          |          |          |          |      |       |       |      |      |      |
|--------------------|----------|----------|----------|----------|------|-------|-------|------|------|------|
| Solyc01g105540.2.1 | 1.550904 | 4.885441 | 0.000113 | 0.001006 | 2731 | 3065  | 2526  | 594  | 718  | 388  |
| Solyc02g021050.2.1 | 1.551122 | 3.559025 | 0.000457 | 0.003273 | 743  | 1617  | 1176  | 224  | 223  | 201  |
| Solyc09g008930.2.1 | 1.551412 | 4.682224 | 0.000845 | 0.005509 | 2801 | 2680  | 1650  | 657  | 442  | 327  |
| Solyc03g006140.2.1 | 1.55163  | 6.336803 | 0.00026  | 0.002033 | 5461 | 9251  | 8865  | 1458 | 1935 | 1216 |
| Solyc09g072650.2.1 | 1.556682 | 3.851692 | 0.000945 | 0.00605  | 539  | 2524  | 1561  | 211  | 358  | 247  |
| Solyc03g097130.2.1 | 1.557198 | 3.737385 | 0.000903 | 0.005824 | 1139 | 1624  | 1099  | 367  | 247  | 136  |
| Solyc12g017410.1.1 | 1.558118 | 3.509332 | 0.000371 | 0.002745 | 658  | 1726  | 1110  | 183  | 307  | 166  |
| Solyc04g039730.2.1 | 1.558142 | 3.127353 | 0.000934 | 0.005997 | 525  | 1248  | 873   | 174  | 231  | 102  |
| Solyc09g065120.2.1 | 1.558607 | 5.562868 | 0.000111 | 0.000987 | 4256 | 6024  | 3487  | 804  | 1117 | 751  |
| Solyc11g062100.1.1 | 1.559533 | 4.203376 | 0.000873 | 0.005662 | 692  | 3003  | 2133  | 272  | 622  | 216  |
| Solyc01g096470.2.1 | 1.559747 | 3.302579 | 0.000761 | 0.005041 | 709  | 1353  | 879   | 143  | 208  | 190  |
| Solyc05g008940.2.1 | 1.56481  | 3.285038 | 0.001016 | 0.006424 | 527  | 1677  | 869   | 222  | 230  | 106  |
| Solyc01g007740.2.1 | 1.566574 | 4.88115  | 6.47E-05 | 0.000624 | 1611 | 4339  | 3100  | 543  | 700  | 426  |
| Solyc03g081240.2.1 | 1.566741 | 5.13644  | 0.000223 | 0.001786 | 3662 | 3225  | 2793  | 557  | 992  | 492  |
| Solyc08g007950.2.1 | 1.568877 | 4.483032 | 9.11E-05 | 0.000835 | 1292 | 3084  | 2398  | 391  | 488  | 364  |
| Solyc03g098280.2.1 | 1.570228 | 6.74642  | 0.000822 | 0.005381 | 5380 | 17889 | 10631 | 1197 | 3430 | 1676 |
| Solyc09g014450.2.1 | 1.57033  | 4.269348 | 0.000271 | 0.00211  | 925  | 3484  | 1777  | 269  | 566  | 284  |
| Solyc01g097800.2.1 | 1.571779 | 3.415203 | 0.001037 | 0.006531 | 608  | 1585  | 1076  | 119  | 257  | 213  |
| Solyc01g103750.2.1 | 1.572746 | 5.329124 | 6.39E-05 | 0.000617 | 2865 | 5034  | 3981  | 730  | 788  | 682  |
| Solyc01g096870.2.1 | 1.57489  | 5.747887 | 0.000308 | 0.002348 | 2611 | 8725  | 5572  | 762  | 1305 | 938  |
| Solyc06g051080.2.1 | 1.574974 | 4.666996 | 5.76E-05 | 0.000564 | 1762 | 3869  | 2137  | 406  | 749  | 328  |
| Solyc01g094890.2.1 | 1.575663 | 5.090193 | 0.000494 | 0.003484 | 1556 | 4467  | 4329  | 367  | 1013 | 580  |
| Solyc12g096500.1.1 | 1.576058 | 6.853278 | 0.00024  | 0.001904 | 8756 | 15613 | 10133 | 2459 | 2676 | 1426 |
| Solyc02g068910.2.1 | 1.57624  | 4.326154 | 0.000799 | 0.005258 | 998  | 3119  | 2131  | 185  | 524  | 408  |
| Solyc04g016240.2.1 | 1.576624 | 4.906912 | 0.000489 | 0.003469 | 1268 | 5076  | 3212  | 330  | 953  | 469  |
| Solyc05g013960.2.1 | 1.577102 | 4.139886 | 8.72E-05 | 0.000804 | 1451 | 2138  | 1546  | 343  | 410  | 240  |
| Solyc11g006340.1.1 | 1.577952 | 4.474717 | 0.001258 | 0.0077   | 952  | 4336  | 1998  | 211  | 833  | 300  |
| Solyc04g049390.2.1 | 1.578233 | 3.940816 | 0.000276 | 0.002145 | 1446 | 1603  | 1286  | 328  | 346  | 191  |
| Solyc05g013310.1.1 | 1.578359 | 3.034092 | 0.001489 | 0.008889 | 805  | 1025  | 530   | 173  | 170  | 111  |
| Solyc06g065480.2.1 | 1.57844  | 5.595592 | 0.000727 | 0.004857 | 5209 | 5303  | 3099  | 1224 | 826  | 603  |
| Solyc07g017990.2.1 | 1.579042 | 3.094845 | 0.000945 | 0.00605  | 472  | 1545  | 705   | 155  | 209  | 118  |
| Solyc07g066430.2.1 | 1.579624 | 4.263263 | 0.000717 | 0.004802 | 724  | 3236  | 2170  | 241  | 486  | 346  |
| Solyc06g082610.2.1 | 1.581467 | 2.806523 | 0.001417 | 0.008525 | 498  | 899   | 672   | 140  | 195  | 71   |
| Solyc03g113800.2.1 | 1.584889 | 6.706901 | 0.000256 | 0.002005 | 6000 | 14956 | 11025 | 2093 | 2322 | 1428 |
| Solyc06g008760.1.1 | 1.586076 | 4.685987 | 0.00055  | 0.003822 | 986  | 3933  | 3161  | 337  | 836  | 342  |
| Solyc07g062610.2.1 | 1.588311 | 5.035735 | 5.88E-05 | 0.000575 | 2098 | 4594  | 3257  | 676  | 597  | 506  |
| Solyc06g048540.2.1 | 1.588403 | 5.423922 | 0.000192 | 0.001572 | 2157 | 6495  | 4690  | 523  | 1132 | 754  |
| Solyc07g063530.2.1 | 1.589485 | 5.129105 | 0.000237 | 0.001882 | 3385 | 3836  | 2736  | 872  | 702  | 378  |
| Solyc04g005800.2.1 | 1.590224 | 5.452971 | 0.000274 | 0.002128 | 1921 | 6340  | 5320  | 642  | 1338 | 573  |
| Solyc01g095280.2.1 | 1.590647 | 3.867412 | 0.000287 | 0.002212 | 759  | 2262  | 1521  | 189  | 397  | 238  |
| Solyc05g013320.1.1 | 1.592048 | 4.32751  | 0.00019  | 0.001564 | 2049 | 2443  | 1280  | 385  | 461  | 275  |
| Solyc01g103430.2.1 | 1.595671 | 6.354619 | 0.000266 | 0.002077 | 7374 | 10243 | 6297  | 1255 | 1703 | 1479 |
| Solyc11g020300.1.1 | 1.596521 | 5.726617 | 0.000863 | 0.005607 | 2241 | 8874  | 5779  | 521  | 1624 | 890  |
| Solyc06g062840.2.1 | 1.596731 | 3.291515 | 0.001062 | 0.006662 | 661  | 1282  | 980   | 187  | 139  | 183  |
| Solyc01g106430.2.1 | 1.597241 | 6.287343 | 0.000695 | 0.004671 | 6950 | 8059  | 7218  | 1980 | 1217 | 1008 |
| Solyc05g014790.2.1 | 1.597595 | 4.870883 | 4.01E-05 | 0.000414 | 1685 | 4381  | 2968  | 482  | 742  | 422  |
| Solyc11g072420.1.1 | 1.598977 | 3.808135 | 0.000128 | 0.001112 | 817  | 2199  | 1337  | 254  | 332  | 195  |
| Solyc07g054090.2.1 | 1.603049 | 2.919886 | 0.001392 | 0.008405 | 419  | 1203  | 736   | 86   | 223  | 120  |
| Solyc04g076180.2.1 | 1.603388 | 4.727911 | 8.50E-05 | 0.000788 | 1542 | 4332  | 2442  | 331  | 754  | 417  |
| Solyc06g053980.2.1 | 1.604578 | 3.835919 | 0.00066  | 0.004467 | 1160 | 1666  | 1329  | 391  | 258  | 136  |
| Solyc04g049850.2.1 | 1.604697 | 4.116248 | 8.23E-05 | 0.000766 | 999  | 2648  | 1726  | 262  | 431  | 271  |
| Solyc01g079680.2.1 | 1.606041 | 4.375811 | 0.000687 | 0.004624 | 1062 | 3404  | 2087  | 173  | 595  | 393  |
| Solyc02g091530.2.1 | 1.606176 | 3.43476  | 0.000592 | 0.004068 | 740  | 1471  | 1042  | 269  | 218  | 111  |
| Solyc05g012790.2.1 | 1.606757 | 3.772084 | 0.000223 | 0.001782 | 1065 | 1337  | 1492  | 220  | 374  | 181  |
| Solyc05g006650.2.1 | 1.609775 | 4.546108 | 0.000149 | 0.001266 | 2239 | 2711  | 1774  | 529  | 442  | 300  |
| Solyc01g068600.2.1 | 1.61034  | 2.94257  | 0.00153  | 0.009102 | 390  | 1231  | 789   | 176  | 184  | 73   |
| Solyc11g010300.1.1 | 1.61043  | 3.960137 | 0.000126 | 0.001099 | 1361 | 1830  | 1325  | 324  | 341  | 195  |
| Solyc05g053280.2.1 | 1.610636 | 4.161707 | 1.00E-04 | 0.000904 | 1002 | 2678  | 1857  | 262  | 411  | 304  |
| Solyc06g075790.2.1 | 1.61163  | 4.220358 | 5.62E-05 | 0.000552 | 1476 | 2389  | 1655  | 352  | 393  | 272  |
| Solyc03g118860.2.1 | 1.612842 | 3.11309  | 0.001027 | 0.006481 | 677  | 1076  | 793   | 213  | 159  | 98   |
| Solyc12g096760.1.1 | 1.617078 | 5.787477 | 8.93E-05 | 0.000821 | 3318 | 8170  | 5557  | 1044 | 1203 | 780  |
| Solyc02g079770.2.1 | 1.617211 | 6.537425 | 0.00017  | 0.001419 | 7896 | 10779 | 8370  | 1357 | 2480 | 1373 |
| Solyc09g074520.2.1 | 1.617351 | 5.173805 | 4.77E-05 | 0.000478 | 3097 | 4911  | 2749  | 682  | 690  | 565  |
| Solyc06g063300.2.1 | 1.621543 | 3.371012 | 0.000488 | 0.003461 | 720  | 1497  | 931   | 125  | 236  | 195  |
| Solyc07g032110.2.1 | 1.622065 | 3.492141 | 0.000194 | 0.001585 | 701  | 1701  | 1070  | 201  | 287  | 141  |
| Solyc07g055200.2.1 | 1.622699 | 5.599663 | 0.000165 | 0.001383 | 2355 | 7789  | 5189  | 608  | 1358 | 755  |
| Solyc07g016180.2.1 | 1.625533 | 4.484071 | 0.000145 | 0.001239 | 1095 | 4169  | 2014  | 483  | 480  | 266  |
| Solyc05g005860.1.1 | 1.62652  | 2.59356  | 0.001241 | 0.007612 | 435  | 865   | 526   | 122  | 119  | 83   |
| Solyc11g071460.1.1 | 1.626545 | 5.480954 | 9.48E-05 | 0.000863 | 4068 | 4532  | 4114  | 800  | 859  | 723  |
| Solyc01g094940.2.1 | 1.626883 | 4.398097 | 4.69E-05 | 0.000472 | 1760 | 2701  | 1778  | 299  | 595  | 294  |
| Solyc04g077660.2.1 | 1.628682 | 4.364739 | 0.000357 | 0.002655 | 1123 | 3210  | 2114  | 185  | 621  | 351  |
| Solyc03g025590.2.1 | 1.628864 | 3.69966  | 0.000111 | 0.000988 | 1062 | 1690  | 1103  | 210  | 291  | 203  |
| Solyc09g083330.2.1 | 1.629247 | 3.571434 | 0.000932 | 0.005988 | 1361 | 1082  | 823   | 246  | 289  | 128  |
| Solyc02g093460.2.1 | 1.629335 | 3.308327 | 0.000481 | 0.003417 | 496  | 1501  | 1091  | 165  | 229  | 146  |
| Solyc03g121480.2.1 | 1.629997 | 3.723352 | 9.73E-05 | 0.000882 | 1023 | 1634  | 1246  | 226  | 304  | 191  |
| Solyc04g064680.2.1 | 1.630223 | 3.437203 | 0.000275 | 0.002138 | 706  | 1537  | 1058  | 199  | 200  | 174  |
| Solyc04g081420.2.1 | 1.631078 | 3.240311 | 0.000994 | 0.006307 | 858  | 1156  | 741   | 230  | 207  | 86   |
| Solyc05g010610.2.1 | 1.631181 | 2.485003 | 0.001298 | 0.007911 | 375  | 847   | 495   | 88   | 139  | 80   |
| Solyc03g119110.2.1 | 1.631878 | 2.670408 | 0.001051 | 0.006602 | 513  | 745   | 597   | 121  | 136  | 87   |
| Solyc09g010300.2.1 | 1.633158 | 3.942634 | 0.00022  | 0.001765 | 1310 | 1805  | 1369  | 360  | 257  | 199  |
| Solyc02g083110.1.1 | 1.635321 | 2.862014 | 0.001686 | 0.009851 | 609  | 939   | 600   | 189  | 139  | 67   |
| Solyc10g007840.2.1 | 1.639533 | 3.680863 | 0.000321 | 0.002436 | 771  | 1927  | 1273  | 136  | 326  | 233  |
| Solyc05g009630.2.1 | 1.640545 | 3.351762 | 0.000411 | 0.002997 | 697  | 1614  | 858   | 201  | 283  | 95   |
| Solyc03g080060.1.1 | 1.641763 | 5.426889 | 0.000924 | 0.005945 | 3861 | 5620  | 3265  | 1287 | 772  | 293  |

|                    |          |          |          |          |       |       |       |      |       |      |
|--------------------|----------|----------|----------|----------|-------|-------|-------|------|-------|------|
| Solyc03g124030.2.1 | 1.641871 | 5.101831 | 0.000444 | 0.003201 | 2772  | 4640  | 2890  | 1005 | 526   | 304  |
| Solyc06g036000.2.1 | 1.644352 | 3.40453  | 0.000469 | 0.003342 | 628   | 1544  | 1092  | 116  | 286   | 178  |
| Solyc01g088460.2.1 | 1.645279 | 2.904676 | 0.000889 | 0.005746 | 651   | 821   | 685   | 128  | 135   | 127  |
| Solyc06g062900.2.1 | 1.648413 | 2.44453  | 0.001479 | 0.008846 | 427   | 754   | 452   | 86   | 107   | 92   |
| Solyc12g015970.1.1 | 1.648829 | 4.851378 | 1.75E-05 | 0.000199 | 2222  | 3791  | 2641  | 515  | 731   | 352  |
| Solyc01g087200.2.1 | 1.648891 | 3.861059 | 0.00049  | 0.003471 | 625   | 2586  | 1502  | 159  | 416   | 230  |
| Solyc12g088400.1.1 | 1.649234 | 3.81962  | 0.000919 | 0.005917 | 697   | 2934  | 1080  | 129  | 461   | 211  |
| Solyc01g087240.2.1 | 1.649788 | 4.335307 | 6.56E-05 | 0.00063  | 1113  | 3444  | 1884  | 272  | 520   | 312  |
| Solyc06g073180.2.1 | 1.650313 | 3.846184 | 0.000837 | 0.005465 | 1102  | 2889  | 679   | 312  | 365   | 128  |
| Solyc12g043020.1.1 | 1.65153  | 4.501119 | 8.14E-05 | 0.000759 | 1443  | 3110  | 2356  | 254  | 587   | 389  |
| Solyc03g097460.2.1 | 1.652425 | 5.413281 | 2.18E-05 | 0.00024  | 2911  | 6279  | 3933  | 694  | 896   | 678  |
| Solyc12g005300.1.1 | 1.653012 | 4.297642 | 0.000637 | 0.004337 | 1250  | 1630  | 2732  | 477  | 332   | 231  |
| Solyc04g008290.2.1 | 1.653779 | 5.650121 | 0.000688 | 0.00463  | 2571  | 8442  | 5042  | 378  | 1489  | 905  |
| Solyc01g103530.2.1 | 1.653853 | 4.297588 | 0.000364 | 0.002705 | 900   | 2617  | 2537  | 218  | 480   | 356  |
| Solyc09g013100.2.1 | 1.654541 | 4.32089  | 3.42E-05 | 0.00036  | 1199  | 2908  | 2069  | 347  | 469   | 270  |
| Solyc10g005330.2.1 | 1.65482  | 4.979058 | 1.75E-05 | 0.000199 | 1928  | 5118  | 2892  | 507  | 799   | 426  |
| Solyc03g118380.1.1 | 1.655413 | 3.430632 | 0.000194 | 0.001585 | 808   | 1597  | 893   | 148  | 266   | 169  |
| Solyc10g084280.1.1 | 1.655519 | 4.616279 | 9.69E-05 | 0.000879 | 1270  | 3788  | 2653  | 290  | 643   | 403  |
| Solyc01g105690.2.1 | 1.656521 | 3.107209 | 0.000389 | 0.002861 | 713   | 1130  | 722   | 150  | 220   | 104  |
| Solyc11g011230.1.1 | 1.656998 | 2.974332 | 0.000515 | 0.003606 | 613   | 1087  | 667   | 109  | 181   | 129  |
| Solyc05g016380.2.1 | 1.657361 | 3.444567 | 0.000165 | 0.001383 | 684   | 1774  | 963   | 192  | 247   | 148  |
| Solyc12g094630.1.1 | 1.657405 | 5.876011 | 0.001505 | 0.008977 | 6288  | 5706  | 4495  | 1715 | 885   | 513  |
| Solyc04g080380.2.1 | 1.658318 | 3.269688 | 0.001643 | 0.009633 | 839   | 1317  | 726   | 272  | 173   | 74   |
| Solyc01g079860.2.1 | 1.658813 | 3.247907 | 0.00042  | 0.00305  | 499   | 1488  | 999   | 163  | 250   | 112  |
| Solyc12g007310.1.1 | 1.658852 | 6.002646 | 5.28E-05 | 0.000523 | 4339  | 8836  | 6384  | 1124 | 1541  | 835  |
| Solyc06g053840.2.1 | 1.659698 | 4.346469 | 8.40E-05 | 0.000779 | 1643  | 3480  | 1256  | 276  | 506   | 319  |
| Solyc12g049390.1.1 | 1.659804 | 4.199778 | 0.000176 | 0.001458 | 926   | 2784  | 2054  | 204  | 493   | 304  |
| Solyc07g055470.2.1 | 1.660079 | 5.466155 | 0.000179 | 0.001479 | 4683  | 4998  | 3000  | 1000 | 863   | 506  |
| Solyc04g051580.2.1 | 1.660205 | 3.745281 | 0.000236 | 0.001877 | 599   | 2034  | 1589  | 210  | 319   | 195  |
| Solyc04g015180.2.1 | 1.662344 | 2.912113 | 0.001621 | 0.009526 | 367   | 1222  | 798   | 79   | 259   | 93   |
| Solyc09g011480.2.1 | 1.664723 | 4.043248 | 3.37E-05 | 0.000355 | 1155  | 2372  | 1524  | 305  | 396   | 198  |
| Solyc02g021700.2.1 | 1.666802 | 3.130719 | 0.000539 | 0.003755 | 520   | 1367  | 852   | 106  | 249   | 127  |
| Solyc06g051960.2.1 | 1.667385 | 5.24477  | 4.68E-05 | 0.000471 | 3637  | 4333  | 3025  | 750  | 731   | 521  |
| Solyc12g070270.1.1 | 1.668832 | 3.122541 | 0.001203 | 0.007422 | 798   | 1032  | 709   | 220  | 176   | 74   |
| Solyc06g007430.1.1 | 1.671549 | 5.218192 | 1.92E-05 | 0.000215 | 2827  | 5747  | 2948  | 541  | 1023  | 490  |
| Solyc06g064460.2.1 | 1.671956 | 3.771159 | 0.000385 | 0.00283  | 1284  | 1761  | 988   | 345  | 249   | 132  |
| Solyc12g096770.1.1 | 1.672537 | 4.190862 | 0.000347 | 0.002601 | 765   | 2697  | 2289  | 412  | 406   | 175  |
| Solyc03g025310.2.1 | 1.673336 | 4.685824 | 2.13E-05 | 0.000235 | 1636  | 3582  | 2680  | 362  | 630   | 392  |
| Solyc02g087140.2.1 | 1.673651 | 3.415357 | 0.000223 | 0.001785 | 778   | 1525  | 955   | 148  | 329   | 123  |
| Solyc02g091950.2.1 | 1.675732 | 3.249388 | 0.000927 | 0.005964 | 432   | 1422  | 1134  | 107  | 294   | 129  |
| Solyc10g039290.1.1 | 1.676273 | 5.004203 | 6.15E-05 | 0.000596 | 3326  | 4056  | 2018  | 565  | 831   | 368  |
| Solyc07g045210.1.1 | 1.677153 | 4.907092 | 6.10E-05 | 0.000593 | 1433  | 4978  | 3208  | 395  | 736   | 476  |
| Solyc05g052350.2.1 | 1.67727  | 2.903858 | 0.000517 | 0.003619 | 580   | 1030  | 649   | 130  | 135   | 120  |
| Solyc01g106010.2.1 | 1.677565 | 4.18525  | 0.000101 | 0.000913 | 1804  | 2172  | 1321  | 387  | 364   | 215  |
| Solyc02g067890.2.1 | 1.679064 | 4.595801 | 0.000142 | 0.001219 | 1491  | 3439  | 2533  | 228  | 600   | 452  |
| Solyc06g069390.2.1 | 1.679115 | 2.702978 | 0.000795 | 0.005236 | 511   | 757   | 645   | 88   | 164   | 97   |
| Solyc03g025510.2.1 | 1.682488 | 4.057933 | 6.64E-05 | 0.000637 | 1243  | 2238  | 1560  | 343  | 419   | 154  |
| Solyc07g018010.2.1 | 1.682972 | 3.531401 | 0.000308 | 0.002351 | 852   | 1932  | 852   | 203  | 352   | 99   |
| Solyc09g010120.2.1 | 1.683348 | 3.244009 | 0.000432 | 0.003123 | 835   | 1035  | 875   | 116  | 232   | 155  |
| Solyc07g006520.2.1 | 1.685693 | 4.842216 | 9.15E-05 | 0.000837 | 2710  | 3246  | 1684  | 684  | 524   | 304  |
| Solyc02g036350.2.1 | 1.685899 | 9.26411  | 0.00018  | 0.001487 | 53958 | 82791 | 48008 | 8777 | 16851 | 8098 |
| Solyc02g069020.2.1 | 1.687589 | 3.232082 | 0.000534 | 0.003728 | 714   | 1266  | 859   | 105  | 317   | 110  |
| Solyc11g068730.1.1 | 1.689312 | 4.756899 | 1.18E-05 | 0.00014  | 1788  | 3941  | 2636  | 409  | 650   | 386  |
| Solyc01g056690.2.1 | 1.690318 | 3.292198 | 0.000186 | 0.001531 | 723   | 1347  | 905   | 170  | 192   | 146  |
| Solyc04g017690.2.1 | 1.690561 | 7.615621 | 0.000372 | 0.002751 | 19484 | 23247 | 14540 | 4443 | 3459  | 2332 |
| Solyc09g091860.2.1 | 1.690638 | 3.295493 | 0.000208 | 0.001681 | 595   | 1434  | 1015  | 150  | 257   | 125  |
| Solyc06g062600.2.1 | 1.691648 | 4.035674 | 0.00017  | 0.001414 | 1358  | 2270  | 1334  | 400  | 345   | 137  |
| Solyc04g072690.2.1 | 1.691746 | 2.340606 | 0.001205 | 0.007429 | 336   | 811   | 436   | 82   | 130   | 61   |
| Solyc11g066660.1.1 | 1.691784 | 3.531464 | 0.000975 | 0.006204 | 1303  | 1166  | 786   | 278  | 247   | 97   |
| Solyc03g097590.2.1 | 1.69725  | 5.615719 | 0.000105 | 0.000943 | 4791  | 5907  | 3681  | 643  | 1580  | 541  |
| Solyc02g089120.2.1 | 1.698079 | 3.750164 | 6.62E-05 | 0.000636 | 1010  | 2040  | 1111  | 170  | 252   | 176  |
| Solyc07g042150.2.1 | 1.698654 | 3.119821 | 0.000437 | 0.003155 | 528   | 1207  | 939   | 276  | 261   | 103  |
| Solyc04g079940.2.1 | 1.699834 | 6.16386  | 8.97E-05 | 0.000823 | 6854  | 9282  | 5172  | 1351 | 1673  | 823  |
| Solyc08g048390.1.1 | 1.701756 | 5.189867 | 9.91E-05 | 0.000897 | 4025  | 3822  | 2542  | 697  | 903   | 379  |
| Solyc11g068820.1.1 | 1.701893 | 5.292949 | 0.001551 | 0.009202 | 4292  | 3521  | 3141  | 1198 | 475   | 328  |
| Solyc10g085680.1.1 | 1.70215  | 2.35643  | 0.001378 | 0.008328 | 326   | 680   | 549   | 87   | 93    | 80   |
| Solyc04g051190.2.1 | 1.702161 | 5.840791 | 7.36E-05 | 0.000697 | 3903  | 8649  | 5308  | 1271 | 1175  | 593  |
| Solyc08g023490.2.1 | 1.702471 | 2.41417  | 0.001431 | 0.008605 | 404   | 726   | 481   | 121  | 109   | 51   |
| Solyc11g062430.1.1 | 1.704539 | 3.804315 | 4.38E-05 | 0.000445 | 911   | 2092  | 1346  | 216  | 370   | 170  |
| Solyc06g082390.2.1 | 1.704554 | 5.19878  | 1.09E-05 | 0.000131 | 2455  | 5923  | 3215  | 545  | 867   | 531  |
| Solyc03g044160.1.1 | 1.706015 | 3.914357 | 9.24E-05 | 0.000845 | 808   | 2660  | 1415  | 192  | 406   | 213  |
| Solyc11g010280.1.1 | 1.70658  | 5.199468 | 0.000398 | 0.002914 | 2102  | 6176  | 3499  | 262  | 903   | 740  |
| Solyc11g017200.1.1 | 1.708003 | 4.763752 | 1.09E-05 | 0.000131 | 2039  | 3576  | 2615  | 514  | 548   | 354  |
| Solyc11g013750.1.1 | 1.709508 | 3.369171 | 0.000699 | 0.004696 | 989   | 1280  | 774   | 264  | 164   | 103  |
| Solyc05g051770.2.1 | 1.709595 | 2.937898 | 0.00038  | 0.002803 | 602   | 1006  | 697   | 152  | 140   | 101  |
| Solyc12g095780.1.1 | 1.710318 | 3.307127 | 0.000333 | 0.002518 | 476   | 1403  | 1212  | 163  | 222   | 134  |
| Solyc10g086240.1.1 | 1.710428 | 4.794052 | 0.000429 | 0.003111 | 1448  | 4513  | 2911  | 195  | 715   | 539  |
| Solyc06g084290.2.1 | 1.711499 | 3.106714 | 0.000394 | 0.002887 | 546   | 1146  | 939   | 113  | 254   | 104  |
| Solyc08g079880.1.1 | 1.711614 | 3.330117 | 0.001205 | 0.00743  | 483   | 895   | 1572  | 148  | 279   | 119  |
| Solyc01g079820.2.1 | 1.714078 | 4.83245  | 7.07E-05 | 0.000673 | 1585  | 4196  | 3153  | 283  | 765   | 466  |
| Solyc01g017600.2.1 | 1.716902 | 4.997281 | 0.000243 | 0.001925 | 1746  | 2688  | 4862  | 528  | 587   | 506  |
| Solyc04g081070.2.1 | 1.717292 | 5.279238 | 6.00E-05 | 0.000585 | 2246  | 6131  | 3940  | 384  | 1123  | 588  |
| Solyc03g078000.2.1 | 1.718302 | 5.925446 | 0.000267 | 0.002084 | 5104  | 7227  | 5715  | 1586 | 994   | 560  |
| Solyc12g021360.1.1 | 1.718992 | 3.687985 | 6.12E-05 | 0.000595 | 1045  | 1638  | 1181  | 254  | 249   | 162  |

|                    |          |          |          |          |       |       |       |      |       |      |
|--------------------|----------|----------|----------|----------|-------|-------|-------|------|-------|------|
| Solyc10g008790.2.1 | 1.719737 | 2.363744 | 0.001235 | 0.00758  | 326   | 682   | 559   | 101  | 94    | 67   |
| Solyc04g045470.2.1 | 1.720246 | 2.887581 | 0.000773 | 0.005114 | 397   | 1050  | 855   | 149  | 186   | 64   |
| Solyc07g006810.2.1 | 1.72057  | 3.899437 | 4.68E-05 | 0.000471 | 844   | 2493  | 1444  | 217  | 378   | 198  |
| Solyc03g120710.2.1 | 1.721006 | 5.226684 | 2.43E-05 | 0.000264 | 1909  | 6171  | 3957  | 687  | 774   | 485  |
| Solyc10g038190.1.1 | 1.721367 | 2.433715 | 0.000939 | 0.006019 | 371   | 646   | 597   | 95   | 111   | 72   |
| Solyc11g066110.1.1 | 1.721805 | 6.314461 | 0.000578 | 0.003984 | 7765  | 9278  | 6278  | 2156 | 1218  | 712  |
| Solyc01g109830.2.1 | 1.724133 | 4.204638 | 6.75E-05 | 0.000645 | 893   | 3146  | 1934  | 231  | 481   | 266  |
| Solyc03g113240.2.1 | 1.724472 | 5.136587 | 0.000212 | 0.00171  | 3422  | 4105  | 2782  | 934  | 566   | 311  |
| Solyc01g097160.2.1 | 1.726637 | 3.120942 | 0.000768 | 0.005085 | 626   | 1132  | 877   | 215  | 118   | 101  |
| Solyc08g048550.2.1 | 1.728928 | 4.061773 | 0.000213 | 0.001718 | 1538  | 1952  | 1422  | 416  | 230   | 190  |
| Solyc11g072710.1.1 | 1.729508 | 7.202943 | 0.000213 | 0.001718 | 15987 | 17407 | 9537  | 2518 | 3094  | 2010 |
| Solyc11g068950.1.1 | 1.733394 | 7.581241 | 0.000183 | 0.001511 | 10310 | 30451 | 20431 | 2260 | 5386  | 2633 |
| Solyc06g009630.1.1 | 1.737084 | 6.74895  | 0.000157 | 0.001322 | 9040  | 11587 | 10969 | 2376 | 1807  | 1273 |
| Solyc08g076310.2.1 | 1.738159 | 2.679584 | 0.001014 | 0.006413 | 280   | 1108  | 695   | 99   | 170   | 72   |
| Solyc03g116560.1.1 | 1.740636 | 3.021634 | 0.000267 | 0.002084 | 570   | 1220  | 737   | 103  | 217   | 109  |
| Solyc04g077010.2.1 | 1.7411   | 6.093898 | 3.69E-05 | 0.000385 | 5687  | 10288 | 5175  | 937  | 1717  | 938  |
| Solyc10g078920.1.1 | 1.741329 | 5.223123 | 0.000895 | 0.005779 | 4784  | 2686  | 2622  | 935  | 605   | 361  |
| Solyc01g108300.2.1 | 1.742553 | 5.830643 | 3.03E-05 | 0.000323 | 4152  | 8008  | 5400  | 797  | 1617  | 658  |
| Solyc03g005000.2.1 | 1.742571 | 4.757834 | 1.75E-05 | 0.000199 | 2284  | 3402  | 2433  | 569  | 484   | 322  |
| Solyc05g008040.2.1 | 1.742932 | 2.999986 | 0.000816 | 0.005343 | 315   | 1427  | 888   | 141  | 196   | 85   |
| Solyc09g083050.2.1 | 1.743385 | 4.024195 | 0.000728 | 0.004864 | 576   | 4033  | 1180  | 185  | 406   | 254  |
| Solyc01g107330.2.1 | 1.743438 | 3.846125 | 0.000585 | 0.004027 | 665   | 2441  | 1565  | 108  | 449   | 217  |
| Solyc01g106820.2.1 | 1.743983 | 3.359858 | 0.001007 | 0.006377 | 906   | 1667  | 627   | 272  | 132   | 105  |
| Solyc02g067660.2.1 | 1.746261 | 3.659677 | 5.57E-05 | 0.000548 | 1026  | 1840  | 1023  | 232  | 308   | 128  |
| Solyc06g068140.2.1 | 1.747866 | 6.944945 | 0.000139 | 0.001197 | 11530 | 16901 | 8860  | 2655 | 2455  | 1262 |
| Solyc09g072900.2.1 | 1.748496 | 3.509407 | 0.000173 | 0.001437 | 822   | 1671  | 1040  | 260  | 233   | 99   |
| Solyc09g063010.2.1 | 1.749304 | 3.735807 | 0.000871 | 0.005653 | 1735  | 1443  | 588   | 256  | 299   | 140  |
| Solyc08g082120.2.1 | 1.751236 | 6.78111  | 0.000264 | 0.002061 | 4176  | 20642 | 11968 | 1799 | 2241  | 1555 |
| Solyc11g072540.1.1 | 1.751449 | 5.249008 | 6.15E-05 | 0.000597 | 3996  | 4286  | 2782  | 804  | 630   | 472  |
| Solyc02g062140.2.1 | 1.751858 | 4.989677 | 0.000135 | 0.001164 | 3520  | 3630  | 2067  | 742  | 558   | 318  |
| Solyc04g008690.2.1 | 1.753234 | 3.49774  | 6.11E-05 | 0.000594 | 859   | 1543  | 1052  | 175  | 221   | 171  |
| Solyc12g014390.1.1 | 1.753272 | 5.013442 | 0.000268 | 0.002086 | 2767  | 3855  | 3004  | 912  | 436   | 270  |
| Solyc12g070280.1.1 | 1.754812 | 2.764678 | 0.000722 | 0.00483  | 599   | 867   | 566   | 154  | 131   | 63   |
| Solyc10g083490.1.1 | 1.755122 | 4.598372 | 8.53E-06 | 0.000106 | 1519  | 3535  | 2531  | 422  | 552   | 284  |
| Solyc10g005530.2.1 | 1.755715 | 5.53353  | 5.31E-05 | 0.000526 | 2413  | 8187  | 4553  | 504  | 1289  | 656  |
| Solyc07g045170.2.1 | 1.755872 | 2.363874 | 0.001394 | 0.008412 | 231   | 851   | 577   | 71   | 129   | 67   |
| Solyc06g066030.2.1 | 1.756084 | 5.418999 | 7.98E-06 | 0.0001   | 3551  | 5115  | 4125  | 758  | 944   | 510  |
| Solyc06g066340.2.1 | 1.756775 | 2.050746 | 0.001709 | 0.009971 | 203   | 694   | 435   | 66   | 99    | 49   |
| Solyc02g086090.2.1 | 1.757112 | 3.363549 | 0.000132 | 0.001142 | 967   | 1302  | 798   | 140  | 257   | 138  |
| Solyc11g068790.1.1 | 1.757265 | 3.966458 | 4.55E-05 | 0.000459 | 934   | 2365  | 1634  | 179  | 430   | 215  |
| Solyc05g007120.2.1 | 1.757703 | 4.61509  | 1.04E-05 | 0.000126 | 1790  | 3519  | 2285  | 324  | 509   | 399  |
| Solyc05g015050.2.1 | 1.759193 | 5.668887 | 0.001545 | 0.009179 | 6884  | 3999  | 2942  | 1318 | 731   | 491  |
| Solyc09g011210.2.1 | 1.763218 | 2.666188 | 0.000552 | 0.00383  | 423   | 868   | 661   | 113  | 102   | 95   |
| Solyc10g075100.1.1 | 1.765447 | 9.047357 | 0.000282 | 0.002183 | 34900 | 89125 | 46079 | 9608 | 15528 | 3809 |
| Solyc03g113030.2.1 | 1.766123 | 3.14563  | 0.000515 | 0.003611 | 451   | 1105  | 1167  | 138  | 150   | 144  |
| Solyc03g119600.1.1 | 1.766742 | 3.846904 | 0.000109 | 0.000975 | 975   | 2437  | 1199  | 149  | 293   | 268  |
| Solyc01g110020.2.1 | 1.767477 | 3.446719 | 0.000183 | 0.001506 | 661   | 1701  | 1095  | 112  | 248   | 188  |
| Solyc04g050540.2.1 | 1.76904  | 3.918303 | 3.77E-05 | 0.000391 | 856   | 2285  | 1648  | 259  | 378   | 156  |
| Solyc06g006000.2.1 | 1.77017  | 5.733177 | 5.47E-05 | 0.00054  | 4117  | 4912  | 6455  | 742  | 1183  | 777  |
| Solyc04g016360.2.1 | 1.771068 | 5.2931   | 6.37E-05 | 0.000616 | 1677  | 6476  | 4620  | 450  | 966   | 596  |
| Solyc04g079790.2.1 | 1.772008 | 5.194207 | 7.95E-06 | 0.0001   | 2585  | 4639  | 3948  | 688  | 682   | 465  |
| Solyc01g094570.2.1 | 1.772246 | 3.23996  | 0.000114 | 0.00101  | 807   | 1271  | 789   | 137  | 230   | 120  |
| Solyc12g098350.1.1 | 1.774367 | 4.033258 | 2.49E-05 | 0.000271 | 1555  | 1924  | 1362  | 301  | 335   | 194  |
| Solyc06g069450.2.1 | 1.774824 | 2.589023 | 0.000541 | 0.003768 | 509   | 855   | 475   | 75   | 132   | 94   |
| Solyc07g049230.1.1 | 1.775113 | 3.73906  | 5.82E-05 | 0.00057  | 810   | 2014  | 1392  | 274  | 226   | 162  |
| Solyc11g069470.1.1 | 1.775569 | 4.808057 | 5.92E-06 | 7.78E-05 | 1971  | 4428  | 2472  | 368  | 741   | 355  |
| Solyc06g007760.2.1 | 1.77565  | 4.27515  | 0.001033 | 0.006512 | 1867  | 1994  | 1758  | 582  | 205   | 156  |
| Solyc01g080080.2.1 | 1.776671 | 3.731124 | 3.29E-05 | 0.000348 | 900   | 2025  | 1254  | 179  | 273   | 209  |
| Solyc01g079360.2.1 | 1.778173 | 5.12124  | 2.04E-05 | 0.000228 | 2686  | 4685  | 3304  | 801  | 596   | 348  |
| Solyc10g079840.1.1 | 1.778299 | 3.040117 | 0.00035  | 0.002616 | 810   | 990   | 629   | 98   | 220   | 109  |
| Solyc08g083010.2.1 | 1.781221 | 4.484812 | 0.001412 | 0.008503 | 2878  | 1778  | 1486  | 620  | 279   | 197  |
| Solyc02g093630.2.1 | 1.781348 | 6.99212  | 4.97E-05 | 0.000496 | 8180  | 17795 | 13757 | 1663 | 3402  | 1594 |
| Solyc04g008730.2.1 | 1.781958 | 4.241006 | 4.04E-05 | 0.000415 | 1407  | 2084  | 2151  | 203  | 501   | 273  |
| Solyc04g078810.2.1 | 1.782145 | 2.314473 | 0.001635 | 0.009595 | 251   | 664   | 630   | 60   | 150   | 54   |
| Solyc04g080390.2.1 | 1.783612 | 4.341205 | 9.87E-06 | 0.000121 | 1749  | 2658  | 1739  | 379  | 390   | 246  |
| Solyc08g081830.2.1 | 1.784853 | 3.252031 | 0.000154 | 0.0013   | 626   | 1376  | 973   | 106  | 242   | 139  |
| Solyc01g105460.2.1 | 1.785311 | 4.502053 | 8.51E-06 | 0.000106 | 1452  | 3279  | 2376  | 343  | 596   | 247  |
| Solyc03g026110.2.1 | 1.786751 | 4.801519 | 4.88E-06 | 6.57E-05 | 2032  | 4151  | 2550  | 379  | 574   | 432  |
| Solyc03g117810.2.1 | 1.789227 | 5.513731 | 6.56E-06 | 8.50E-05 | 2949  | 6964  | 4560  | 667  | 1150  | 547  |
| Solyc01g103110.2.1 | 1.789518 | 3.906454 | 1.28E-05 | 0.000151 | 1210  | 2061  | 1331  | 232  | 347   | 185  |
| Solyc12g014150.1.1 | 1.79046  | 2.013182 | 0.001382 | 0.00835  | 311   | 450   | 434   | 77   | 82    | 43   |
| Solyc01g080150.2.1 | 1.791633 | 3.901309 | 0.000494 | 0.003484 | 427   | 2427  | 2054  | 206  | 372   | 189  |
| Solyc08g005860.2.1 | 1.792041 | 4.185874 | 2.53E-05 | 0.000275 | 874   | 2998  | 2040  | 289  | 399   | 231  |
| Solyc08g068590.2.1 | 1.792174 | 3.42785  | 0.000372 | 0.002752 | 866   | 1387  | 1014  | 277  | 152   | 98   |
| Solyc05g009920.2.1 | 1.794029 | 3.418982 | 0.000131 | 0.001139 | 751   | 1474  | 1083  | 223  | 156   | 137  |
| Solyc12g005280.1.1 | 1.794132 | 2.584414 | 0.00099  | 0.006286 | 254   | 903   | 760   | 93   | 154   | 63   |
| Solyc01g107430.2.1 | 1.795123 | 3.87943  | 0.000167 | 0.001395 | 1776  | 1567  | 871   | 246  | 301   | 188  |
| Solyc08g043180.2.1 | 1.795502 | 4.41636  | 0.000147 | 0.001254 | 1483  | 2788  | 2297  | 563  | 334   | 165  |
| Solyc08g081310.2.1 | 1.796716 | 5.426399 | 3.53E-06 | 4.93E-05 | 3046  | 6153  | 4226  | 725  | 953   | 504  |
| Solyc07g006340.2.1 | 1.796892 | 3.573449 | 0.000135 | 0.001166 | 1211  | 1342  | 935   | 250  | 217   | 125  |
| Solyc02g069030.2.1 | 1.798752 | 2.94655  | 0.000649 | 0.004408 | 822   | 924   | 520   | 168  | 154   | 67   |
| Solyc01g006970.2.1 | 1.798883 | 4.69779  | 5.04E-06 | 6.76E-05 | 1699  | 4308  | 2341  | 343  | 641   | 341  |
| Solyc09g092160.2.1 | 1.799748 | 3.904749 | 0.000677 | 0.004566 | 1727  | 1601  | 985   | 394  | 189   | 141  |
| Solyc09g065130.2.1 | 1.800594 | 4.219682 | 0.000193 | 0.001581 | 701   | 3498  | 2062  | 190  | 444   | 299  |

|                    |          |          |          |          |       |       |       |      |      |      |
|--------------------|----------|----------|----------|----------|-------|-------|-------|------|------|------|
| Solyc10g085100.1.1 | 1.802773 | 3.957893 | 0.000118 | 0.001041 | 847   | 2470  | 1680  | 342  | 345  | 113  |
| Solyc02g086150.2.1 | 1.803619 | 2.586587 | 0.000558 | 0.003866 | 342   | 886   | 666   | 85   | 108  | 96   |
| Solyc01g087260.2.1 | 1.804825 | 5.945264 | 0.000535 | 0.003735 | 7349  | 6295  | 3988  | 1546 | 859  | 593  |
| Solyc11g045100.1.1 | 1.804861 | 2.356287 | 0.000574 | 0.003962 | 326   | 766   | 517   | 72   | 117  | 67   |
| Solyc01g096190.2.1 | 1.807773 | 4.219127 | 7.44E-06 | 9.47E-05 | 1380  | 2709  | 1728  | 239  | 466  | 243  |
| Solyc05g052710.2.1 | 1.808494 | 4.571597 | 1.85E-05 | 0.000209 | 2201  | 2606  | 2209  | 465  | 389  | 300  |
| Solyc07g042260.2.1 | 1.809167 | 4.262818 | 2.00E-05 | 0.000223 | 1952  | 2564  | 1272  | 305  | 429  | 232  |
| Solyc12g005040.1.1 | 1.809844 | 2.997293 | 0.000574 | 0.003964 | 907   | 804   | 571   | 137  | 129  | 116  |
| Solyc03g113620.2.1 | 1.810971 | 5.214006 | 1.70E-05 | 0.000194 | 3925  | 4596  | 2517  | 658  | 715  | 460  |
| Solyc04g025040.1.1 | 1.811344 | 5.789496 | 1.08E-05 | 0.00013  | 3816  | 7803  | 5670  | 790  | 1161 | 786  |
| Solyc07g063430.2.1 | 1.811876 | 7.09991  | 0.000494 | 0.003484 | 13789 | 18379 | 9345  | 3597 | 1835 | 1221 |
| Solyc09g011830.2.1 | 1.815114 | 3.481559 | 6.06E-05 | 0.00059  | 588   | 1861  | 1180  | 174  | 232  | 146  |
| Solyc08g082670.2.1 | 1.815847 | 4.405808 | 0.000209 | 0.001695 | 2716  | 1579  | 1515  | 385  | 419  | 246  |
| Solyc11g012820.1.1 | 1.815905 | 2.972254 | 0.000147 | 0.001252 | 532   | 1187  | 755   | 98   | 188  | 107  |
| Solyc09g056160.2.1 | 1.818116 | 4.817592 | 6.42E-05 | 0.000619 | 1065  | 5124  | 3254  | 355  | 755  | 340  |
| Solyc01g079390.2.1 | 1.819033 | 5.493389 | 8.81E-06 | 0.000109 | 4292  | 5758  | 3543  | 807  | 853  | 553  |
| Solyc12g014110.1.1 | 1.821481 | 4.295621 | 0.00049  | 0.003471 | 547   | 2933  | 2910  | 226  | 435  | 305  |
| Solyc01g105410.2.1 | 1.823932 | 7.182732 | 3.43E-05 | 0.000361 | 11616 | 23816 | 10907 | 2120 | 3591 | 1680 |
| Solyc07g063610.2.1 | 1.824708 | 2.640464 | 0.000686 | 0.004621 | 338   | 814   | 787   | 120  | 144  | 52   |
| Solyc12g013890.1.1 | 1.825546 | 3.696935 | 0.000816 | 0.005346 | 1300  | 1508  | 1030  | 367  | 189  | 79   |
| Solyc04g051780.2.1 | 1.825957 | 3.104211 | 0.000118 | 0.001045 | 619   | 1293  | 793   | 107  | 228  | 103  |
| Solyc01g005330.2.1 | 1.827794 | 5.228768 | 6.40E-06 | 8.32E-05 | 2370  | 5740  | 3848  | 440  | 809  | 585  |
| Solyc04g081210.2.1 | 1.828361 | 4.927735 | 2.32E-06 | 3.42E-05 | 2233  | 4449  | 2873  | 408  | 776  | 363  |
| Solyc02g078860.2.1 | 1.830723 | 2.943316 | 0.000329 | 0.002493 | 517   | 1067  | 811   | 167  | 105  | 91   |
| Solyc11g069510.1.1 | 1.830938 | 3.88101  | 8.38E-06 | 0.000104 | 1175  | 2018  | 1355  | 231  | 325  | 176  |
| Solyc01g083380.1.1 | 1.831173 | 5.797159 | 0.000175 | 0.001451 | 5404  | 7955  | 3735  | 1214 | 1292 | 353  |
| Solyc09g091010.2.1 | 1.831591 | 3.584914 | 2.87E-05 | 0.000307 | 1017  | 1471  | 1137  | 217  | 236  | 136  |
| Solyc08g079180.2.1 | 1.831951 | 4.867705 | 7.07E-05 | 0.000673 | 1130  | 5990  | 2916  | 325  | 726  | 411  |
| Solyc01g097820.2.1 | 1.832773 | 1.862438 | 0.001466 | 0.008776 | 247   | 575   | 329   | 54   | 104  | 30   |
| Solyc02g005210.2.1 | 1.832975 | 4.765685 | 2.00E-06 | 3.03E-05 | 1983  | 3867  | 2656  | 399  | 554  | 375  |
| Solyc03g117600.2.1 | 1.833708 | 5.647424 | 6.32E-06 | 8.23E-05 | 3229  | 7009  | 5509  | 839  | 1143 | 536  |
| Solyc10g086220.1.1 | 1.834111 | 5.619292 | 1.63E-05 | 0.000187 | 2546  | 8200  | 5327  | 595  | 1109 | 718  |
| Solyc02g085030.2.1 | 1.836207 | 2.868002 | 0.000557 | 0.003857 | 324   | 1049  | 954   | 141  | 118  | 89   |
| Solyc11g065930.1.1 | 1.836765 | 7.463344 | 0.00105  | 0.0066   | 4170  | 27864 | 26348 | 2520 | 3816 | 2356 |
| Solyc09g098580.2.1 | 1.840147 | 4.493016 | 8.72E-06 | 0.000108 | 1849  | 3261  | 1908  | 464  | 396  | 234  |
| Solyc12g015640.1.1 | 1.840885 | 3.36572  | 4.19E-05 | 0.000429 | 861   | 1501  | 843   | 175  | 201  | 125  |
| Solyc12g099160.1.1 | 1.842116 | 4.252508 | 0.000112 | 0.001    | 1195  | 2731  | 2091  | 142  | 414  | 356  |
| Solyc09g082810.2.1 | 1.846838 | 5.481738 | 0.000319 | 0.002424 | 1205  | 9006  | 5252  | 522  | 957  | 686  |
| Solyc06g075360.2.1 | 1.848361 | 3.491303 | 0.000158 | 0.00133  | 520   | 1835  | 1318  | 113  | 292  | 156  |
| Solyc10g084250.1.1 | 1.851929 | 2.638663 | 0.000401 | 0.002929 | 346   | 855   | 755   | 79   | 122  | 95   |
| Solyc02g092610.2.1 | 1.851963 | 2.549759 | 0.001236 | 0.007585 | 429   | 688   | 655   | 40   | 139  | 103  |
| Solyc02g092920.2.1 | 1.854731 | 5.279274 | 7.73E-05 | 0.000725 | 1953  | 6346  | 4395  | 331  | 754  | 735  |
| Solyc06g069630.2.1 | 1.855326 | 2.881887 | 0.000946 | 0.00605  | 759   | 791   | 606   | 182  | 86   | 74   |
| Solyc01g081490.2.1 | 1.856738 | 4.289968 | 1.09E-05 | 0.000131 | 1502  | 2637  | 1923  | 404  | 311  | 215  |
| Solyc03g083090.2.1 | 1.856858 | 6.253034 | 1.04E-05 | 0.000126 | 5722  | 10286 | 7702  | 1075 | 1495 | 1087 |
| Solyc08g066140.2.1 | 1.857271 | 3.821064 | 8.07E-06 | 0.000101 | 953   | 2023  | 1475  | 215  | 306  | 170  |
| Solyc09g091240.2.1 | 1.858452 | 4.336041 | 4.54E-05 | 0.000459 | 1349  | 2535  | 2357  | 473  | 305  | 185  |
| Solyc08g005800.2.1 | 1.858541 | 6.007742 | 5.75E-05 | 0.000564 | 3162  | 7979  | 9010  | 1088 | 1425 | 672  |
| Solyc06g009790.2.1 | 1.859484 | 2.939325 | 0.000408 | 0.002974 | 484   | 1123  | 820   | 59   | 204  | 116  |
| Solyc10g083350.1.1 | 1.859511 | 2.929864 | 0.000118 | 0.00104  | 541   | 989   | 821   | 135  | 156  | 80   |
| Solyc05g051460.2.1 | 1.859535 | 4.854937 | 0.000881 | 0.005703 | 689   | 4972  | 4073  | 231  | 810  | 413  |
| Solyc05g056370.2.1 | 1.859608 | 5.644895 | 2.17E-05 | 0.000239 | 5536  | 5609  | 3571  | 851  | 1027 | 564  |
| Solyc04g071700.2.1 | 1.8609   | 2.857486 | 0.001346 | 0.008165 | 709   | 849   | 598   | 195  | 79   | 62   |
| Solyc04g049630.2.1 | 1.860901 | 3.740816 | 2.24E-05 | 0.000246 | 713   | 2045  | 1546  | 185  | 301  | 168  |
| Solyc03g112940.2.1 | 1.861435 | 3.461699 | 4.04E-05 | 0.000416 | 690   | 1927  | 991   | 200  | 231  | 109  |
| Solyc04g015850.2.1 | 1.862147 | 2.774291 | 0.000343 | 0.002578 | 613   | 833   | 614   | 145  | 126  | 60   |
| Solyc10g081310.1.1 | 1.862418 | 5.526243 | 5.00E-05 | 0.000499 | 1987  | 7951  | 5376  | 491  | 959  | 748  |
| Solyc09g074100.2.1 | 1.862966 | 4.328758 | 1.41E-05 | 0.000165 | 1941  | 2794  | 1434  | 398  | 361  | 208  |
| Solyc06g051900.2.1 | 1.864235 | 3.242796 | 6.66E-05 | 0.000638 | 767   | 1286  | 870   | 158  | 153  | 131  |
| Solyc07g061900.2.1 | 1.864863 | 5.391001 | 6.32E-06 | 8.23E-05 | 3216  | 5457  | 4290  | 870  | 699  | 435  |
| Solyc11g008540.1.1 | 1.865876 | 4.734542 | 6.93E-05 | 0.00066  | 3026  | 2626  | 2029  | 578  | 391  | 284  |
| Solyc05g052030.1.1 | 1.866916 | 6.157322 | 9.13E-06 | 0.000113 | 6180  | 9747  | 6137  | 949  | 1551 | 961  |
| Solyc03g078080.2.1 | 1.868108 | 4.440935 | 0.000722 | 0.00483  | 2219  | 2443  | 1773  | 638  | 203  | 162  |
| Solyc04g007000.1.1 | 1.868305 | 6.188177 | 0.000129 | 0.001126 | 7252  | 9938  | 5124  | 1692 | 1336 | 535  |
| Solyc11g045250.1.1 | 1.868597 | 2.84365  | 0.000745 | 0.004953 | 261   | 1329  | 829   | 73   | 168  | 106  |
| Solyc10g007320.2.1 | 1.868935 | 3.814456 | 0.000191 | 0.001564 | 480   | 2161  | 1961  | 195  | 261  | 207  |
| Solyc06g048950.2.1 | 1.869386 | 2.936828 | 0.000116 | 0.001027 | 680   | 881   | 731   | 123  | 142  | 98   |
| Solyc06g065260.2.1 | 1.871254 | 5.170264 | 2.26E-06 | 3.34E-05 | 3372  | 4952  | 2759  | 551  | 746  | 443  |
| Solyc09g065300.2.1 | 1.871406 | 3.305831 | 6.26E-05 | 0.000606 | 708   | 1332  | 1036  | 192  | 191  | 95   |
| Solyc04g080470.2.1 | 1.871794 | 3.013267 | 0.000153 | 0.001292 | 635   | 1053  | 795   | 80   | 202  | 113  |
| Solyc02g079360.1.1 | 1.873529 | 2.505521 | 0.000793 | 0.005227 | 514   | 653   | 528   | 132  | 87   | 49   |
| Solyc06g050760.1.1 | 1.875249 | 3.816459 | 0.000103 | 0.00093  | 1446  | 1540  | 1170  | 322  | 208  | 133  |
| Solyc01g099260.2.1 | 1.879366 | 4.835707 | 1.96E-06 | 2.98E-05 | 1971  | 4200  | 2892  | 336  | 641  | 400  |
| Solyc01g109100.2.1 | 1.880379 | 2.360254 | 0.001146 | 0.007128 | 449   | 576   | 507   | 103  | 124  | 30   |
| Solyc02g070390.2.1 | 1.881106 | 3.835198 | 8.30E-05 | 0.000772 | 722   | 2364  | 1597  | 122  | 382  | 200  |
| Solyc09g009940.2.1 | 1.881292 | 6.705284 | 0.001559 | 0.00924  | 12600 | 9988  | 7336  | 3017 | 1111 | 718  |
| Solyc04g077130.1.1 | 1.884374 | 3.156942 | 0.000208 | 0.001684 | 403   | 1255  | 1195  | 112  | 195  | 120  |
| Solyc03g117430.2.1 | 1.884782 | 7.607935 | 0.000367 | 0.002726 | 26305 | 16291 | 11862 | 3322 | 3837 | 2200 |
| Solyc02g092530.2.1 | 1.884897 | 4.488988 | 3.92E-06 | 5.41E-05 | 1599  | 3574  | 2042  | 412  | 348  | 282  |
| Solyc03g078610.2.1 | 1.887328 | 3.463912 | 0.000273 | 0.002126 | 1379  | 1107  | 677   | 212  | 180  | 124  |
| Solyc03g083200.2.1 | 1.887642 | 1.776866 | 0.000967 | 0.006161 | 199   | 553   | 351   | 52   | 72   | 39   |
| Solyc04g078620.2.1 | 1.889855 | 2.540231 | 0.000732 | 0.00488  | 261   | 989   | 669   | 54   | 140  | 85   |
| Solyc02g086860.2.1 | 1.891552 | 3.371585 | 0.000334 | 0.002524 | 361   | 1856  | 1269  | 109  | 225  | 156  |
| Solyc05g056520.2.1 | 1.891762 | 1.711011 | 0.001314 | 0.007989 | 252   | 516   | 267   | 32   | 88   | 40   |

|                    |          |          |          |          |      |       |       |      |      |     |
|--------------------|----------|----------|----------|----------|------|-------|-------|------|------|-----|
| Solyc06g053910.2.1 | 1.892494 | 4.889542 | 3.77E-05 | 0.000391 | 1572 | 5353  | 2974  | 237  | 866  | 382 |
| Solyc01g104580.2.1 | 1.893655 | 3.197535 | 0.00015  | 0.001277 | 449  | 1404  | 1118  | 101  | 203  | 132 |
| Solyc12g036140.1.1 | 1.89412  | 2.817787 | 0.000731 | 0.004874 | 751  | 750   | 564   | 168  | 103  | 58  |
| Solyc11g008620.1.1 | 1.896569 | 5.351001 | 9.26E-05 | 0.000846 | 4996 | 3707  | 2931  | 871  | 728  | 349 |
| Solyc12g008870.1.1 | 1.897092 | 3.171216 | 0.000498 | 0.003503 | 391  | 1574  | 1036  | 68   | 224  | 140 |
| Solyc08g080200.2.1 | 1.897731 | 5.345857 | 1.20E-06 | 1.94E-05 | 3661 | 5364  | 3491  | 592  | 844  | 503 |
| Solyc03g044150.2.1 | 1.897769 | 5.721295 | 3.16E-06 | 4.47E-05 | 4223 | 6473  | 5494  | 744  | 1120 | 658 |
| Solyc01g098990.2.1 | 1.897787 | 3.973081 | 5.70E-06 | 7.54E-05 | 1360 | 1839  | 1554  | 225  | 302  | 210 |
| Solyc04g009530.2.1 | 1.898653 | 3.198285 | 0.000249 | 0.001963 | 494  | 1428  | 1050  | 205  | 123  | 93  |
| Solyc11g008550.1.1 | 1.89911  | 3.186059 | 4.02E-05 | 0.000414 | 629  | 1515  | 806   | 137  | 184  | 110 |
| Solyc03g119920.1.1 | 1.900845 | 3.530804 | 1.13E-05 | 0.000135 | 944  | 1621  | 1042  | 165  | 256  | 134 |
| Solyc11g008150.1.1 | 1.901376 | 5.861629 | 4.28E-06 | 5.85E-05 | 4408 | 8728  | 5356  | 998  | 1164 | 617 |
| Solyc08g079750.2.1 | 1.901415 | 2.42723  | 0.001093 | 0.006834 | 189  | 1125  | 550   | 90   | 91   | 67  |
| Solyc10g011690.2.1 | 1.901944 | 3.521574 | 1.16E-05 | 0.000139 | 790  | 1780  | 1111  | 160  | 258  | 134 |
| Solyc08g082250.2.1 | 1.903409 | 3.891624 | 2.06E-05 | 0.00023  | 1468 | 1659  | 1295  | 200  | 248  | 229 |
| Solyc09g008940.2.1 | 1.904507 | 3.283183 | 0.000103 | 0.00093  | 917  | 1123  | 880   | 195  | 139  | 111 |
| Solyc06g075010.2.1 | 1.905021 | 6.230215 | 0.000242 | 0.001914 | 2143 | 13031 | 10206 | 986  | 1619 | 971 |
| Solyc03g113280.2.1 | 1.90665  | 4.064423 | 0.000166 | 0.001393 | 1466 | 1898  | 1680  | 412  | 159  | 175 |
| Solyc01g068260.2.1 | 1.907785 | 2.438689 | 0.000252 | 0.001982 | 321  | 855   | 573   | 76   | 112  | 67  |
| Solyc04g009730.2.1 | 1.908298 | 2.340461 | 0.000296 | 0.002272 | 372  | 826   | 428   | 64   | 115  | 62  |
| Solyc04g017700.2.1 | 1.910144 | 3.752391 | 0.001415 | 0.008516 | 2083 | 777   | 715   | 262  | 210  | 149 |
| Solyc02g064950.2.1 | 1.911133 | 4.88247  | 2.66E-06 | 3.85E-05 | 1913 | 4193  | 3272  | 317  | 743  | 372 |
| Solyc02g067540.2.1 | 1.911514 | 3.999267 | 6.74E-06 | 8.68E-05 | 877  | 2600  | 1757  | 238  | 291  | 212 |
| Solyc01g090740.2.1 | 1.912834 | 2.755931 | 0.000371 | 0.002744 | 290  | 1281  | 717   | 76   | 144  | 96  |
| Solyc10g007600.2.1 | 1.913371 | 5.503985 | 0.000108 | 0.000962 | 2220 | 4454  | 7212  | 743  | 620  | 667 |
| Solyc12g016220.1.1 | 1.915543 | 2.657884 | 0.000172 | 0.001428 | 359  | 1059  | 649   | 81   | 143  | 76  |
| Solyc07g005510.2.1 | 1.916388 | 4.808618 | 9.13E-05 | 0.000836 | 3692 | 2616  | 1662  | 529  | 461  | 307 |
| Solyc08g065800.1.1 | 1.919638 | 2.642216 | 0.000668 | 0.004513 | 334  | 953   | 730   | 49   | 196  | 68  |
| Solyc01g067890.2.1 | 1.919862 | 6.17739  | 0.000804 | 0.005288 | 9038 | 7830  | 4254  | 1927 | 995  | 447 |
| Solyc03g097190.2.1 | 1.920461 | 5.305819 | 1.25E-06 | 2.00E-05 | 2426 | 5857  | 4431  | 513  | 884  | 486 |
| Solyc12g095760.1.1 | 1.920894 | 5.665811 | 0.00049  | 0.003471 | 1486 | 8806  | 6888  | 360  | 1290 | 777 |
| Solyc01g094500.2.1 | 1.922466 | 2.545288 | 0.000147 | 0.00125  | 453  | 773   | 583   | 89   | 115  | 68  |
| Solyc03g116790.2.1 | 1.922725 | 3.770276 | 1.43E-05 | 0.000166 | 822  | 1751  | 1711  | 212  | 310  | 134 |
| Solyc07g005190.2.1 | 1.923198 | 2.561814 | 0.000368 | 0.00273  | 334  | 854   | 697   | 102  | 79   | 81  |
| Solyc08g005310.2.1 | 1.923315 | 3.954362 | 3.97E-06 | 5.47E-05 | 1027 | 2397  | 1570  | 190  | 325  | 210 |
| Solyc10g011660.2.1 | 1.923344 | 5.653402 | 1.05E-05 | 0.000127 | 5347 | 7126  | 3055  | 758  | 1108 | 540 |
| Solyc08g063090.2.1 | 1.924121 | 2.23057  | 0.000755 | 0.005011 | 348  | 700   | 437   | 80   | 123  | 29  |
| Solyc09g061860.2.1 | 1.924526 | 4.823578 | 0.00022  | 0.001766 | 2030 | 5590  | 1919  | 764  | 365  | 177 |
| Solyc05g013160.2.1 | 1.924792 | 4.303783 | 1.54E-06 | 2.40E-05 | 1384 | 2909  | 2004  | 314  | 357  | 242 |
| Solyc04g082040.2.1 | 1.924985 | 3.024886 | 0.000167 | 0.001387 | 800  | 710   | 846   | 127  | 187  | 80  |
| Solyc08g006530.2.1 | 1.925801 | 4.45391  | 2.67E-06 | 3.87E-05 | 1553 | 3442  | 2070  | 377  | 502  | 183 |
| Solyc09g009420.1.1 | 1.925815 | 4.166967 | 7.45E-05 | 0.000704 | 2094 | 1384  | 1593  | 283  | 449  | 149 |
| Solyc03g098630.2.1 | 1.926157 | 4.898188 | 3.37E-06 | 4.73E-05 | 2734 | 4100  | 2423  | 589  | 521  | 282 |
| Solyc09g013090.2.1 | 1.92685  | 3.338329 | 3.08E-05 | 0.000327 | 940  | 1433  | 770   | 135  | 191  | 139 |
| Solyc01g097910.2.1 | 1.927132 | 3.51861  | 0.000724 | 0.004843 | 1569 | 1029  | 630   | 257  | 154  | 109 |
| Solyc01g006930.2.1 | 1.9295   | 3.986971 | 0.001251 | 0.007666 | 491  | 3369  | 1719  | 74   | 439  | 249 |
| Solyc07g061970.2.1 | 1.930826 | 4.396136 | 2.08E-06 | 3.12E-05 | 1247 | 3208  | 2358  | 347  | 397  | 236 |
| Solyc01g091480.2.1 | 1.931094 | 3.174695 | 6.17E-05 | 0.000598 | 478  | 1504  | 992   | 124  | 210  | 97  |
| Solyc07g062740.2.1 | 1.932635 | 2.435332 | 0.000556 | 0.003854 | 622  | 597   | 368   | 84   | 126  | 49  |
| Solyc08g067210.2.1 | 1.934191 | 4.006006 | 9.58E-06 | 0.000118 | 849  | 2879  | 1651  | 190  | 405  | 180 |
| Solyc06g083690.2.1 | 1.934511 | 4.909674 | 5.98E-05 | 0.000584 | 2444 | 3275  | 3385  | 735  | 343  | 270 |
| Solyc05g009820.2.1 | 1.935041 | 2.942962 | 0.000481 | 0.003419 | 763  | 617   | 827   | 166  | 135  | 58  |
| Solyc03g032040.2.1 | 1.935433 | 1.711009 | 0.001037 | 0.006531 | 174  | 592   | 320   | 38   | 70   | 43  |
| Solyc01g107800.2.1 | 1.935442 | 2.987231 | 0.000132 | 0.001146 | 443  | 1473  | 745   | 84   | 211  | 89  |
| Solyc03g005340.2.1 | 1.937117 | 4.807491 | 1.49E-06 | 2.35E-05 | 1590 | 4141  | 3313  | 410  | 595  | 314 |
| Solyc08g082000.2.1 | 1.937199 | 2.357937 | 0.000377 | 0.002783 | 299  | 757   | 586   | 56   | 130  | 59  |
| Solyc01g087390.2.1 | 1.93818  | 2.21082  | 0.000354 | 0.002635 | 315  | 764   | 421   | 75   | 102  | 42  |
| Solyc11g065820.1.1 | 1.938319 | 2.640211 | 0.001291 | 0.007873 | 217  | 1212  | 711   | 45   | 165  | 87  |
| Solyc04g082740.2.1 | 1.938335 | 2.482777 | 0.000296 | 0.002276 | 397  | 896   | 508   | 90   | 141  | 41  |
| Solyc10g009410.1.1 | 1.940246 | 5.281487 | 4.01E-06 | 5.52E-05 | 4126 | 5149  | 2620  | 512  | 932  | 420 |
| Solyc11g020780.1.1 | 1.943862 | 5.069417 | 7.06E-06 | 9.03E-05 | 2225 | 5624  | 3171  | 279  | 937  | 416 |
| Solyc03g118510.2.1 | 1.944309 | 2.871011 | 0.001021 | 0.006454 | 313  | 1001  | 1035  | 47   | 162  | 125 |
| Solyc03g025320.2.1 | 1.945251 | 5.036513 | 1.76E-05 | 0.0002   | 3217 | 4549  | 2413  | 731  | 549  | 245 |
| Solyc12g013920.1.1 | 1.945773 | 3.510337 | 0.000227 | 0.001813 | 445  | 2304  | 1199  | 92   | 283  | 162 |
| Solyc09g082630.2.1 | 1.946731 | 3.790688 | 9.22E-06 | 0.000114 | 816  | 2411  | 1366  | 237  | 293  | 124 |
| Solyc12g019100.1.1 | 1.948032 | 1.533752 | 0.001631 | 0.009578 | 161  | 417   | 342   | 54   | 39   | 34  |
| Solyc04g011670.2.1 | 1.948844 | 3.272098 | 0.000143 | 0.001225 | 434  | 1611  | 1163  | 94   | 198  | 148 |
| Solyc01g107020.2.1 | 1.948863 | 1.902232 | 0.000742 | 0.004938 | 294  | 513   | 356   | 75   | 62   | 33  |
| Solyc09g091590.2.1 | 1.949817 | 2.093366 | 0.000808 | 0.005306 | 195  | 713   | 501   | 43   | 101  | 55  |
| Solyc05g018700.2.1 | 1.949874 | 5.782585 | 0.000235 | 0.00187  | 1674 | 9487  | 7496  | 491  | 1234 | 825 |
| Solyc02g083680.1.1 | 1.949874 | 2.679623 | 0.000198 | 0.001613 | 304  | 1054  | 756   | 92   | 128  | 75  |
| Solyc07g047950.1.1 | 1.950564 | 3.978272 | 6.86E-06 | 8.81E-05 | 1417 | 1915  | 1484  | 226  | 237  | 233 |
| Solyc07g061990.2.1 | 1.951183 | 3.823303 | 6.48E-06 | 8.40E-05 | 1405 | 1831  | 1098  | 196  | 277  | 177 |
| Solyc07g062520.2.1 | 1.951477 | 3.11353  | 0.000206 | 0.001672 | 417  | 1425  | 1019  | 76   | 238  | 103 |
| Solyc07g061780.2.1 | 1.951695 | 4.6616   | 9.24E-06 | 0.000114 | 1331 | 4134  | 2890  | 234  | 615  | 343 |
| Solyc11g069330.1.1 | 1.953575 | 5.658772 | 0.000167 | 0.001395 | 1992 | 10077 | 5450  | 461  | 1691 | 421 |
| Solyc12g089000.1.1 | 1.953936 | 3.200418 | 0.000174 | 0.001445 | 476  | 1565  | 1010  | 73   | 245  | 120 |
| Solyc08g068100.2.1 | 1.955479 | 3.550875 | 9.41E-05 | 0.000857 | 1038 | 1703  | 944   | 262  | 128  | 123 |
| Solyc02g084720.2.1 | 1.956757 | 4.453716 | 5.65E-05 | 0.000555 | 743  | 3636  | 2976  | 244  | 544  | 254 |
| Solyc05g054240.2.1 | 1.958407 | 3.287562 | 8.52E-05 | 0.000788 | 472  | 1649  | 1126  | 102  | 258  | 108 |
| Solyc07g045180.2.1 | 1.959241 | 2.448147 | 0.000971 | 0.006183 | 269  | 892   | 636   | 46   | 182  | 46  |
| Solyc03g112150.1.1 | 1.961253 | 5.11571  | 3.63E-07 | 6.75E-06 | 2369 | 5434  | 3448  | 512  | 734  | 371 |
| Solyc11g011440.1.1 | 1.962321 | 5.41931  | 0.000304 | 0.002323 | 1152 | 11205 | 3592  | 430  | 1120 | 498 |
| Solyc07g041340.1.1 | 1.96276  | 2.649256 | 0.000295 | 0.002269 | 731  | 686   | 428   | 98   | 109  | 75  |



|                    |          |          |          |          |       |        |       |       |       |      |
|--------------------|----------|----------|----------|----------|-------|--------|-------|-------|-------|------|
| Solyc04g072400.2.1 | 1.962906 | 5.129332 | 5.82E-05 | 0.00057  | 1333  | 6409   | 4206  | 286   | 770   | 545  |
| Solyc01g080090.2.1 | 1.964115 | 2.13755  | 0.000426 | 0.003091 | 352   | 564    | 443   | 50    | 119   | 42   |
| Solyc02g083970.1.1 | 1.964518 | 3.24124  | 0.000301 | 0.002305 | 675   | 1294   | 1015  | 53    | 226   | 155  |
| Solyc01g095470.2.1 | 1.965363 | 2.629247 | 0.001146 | 0.007128 | 204   | 1668   | 429   | 85    | 128   | 71   |
| Solyc03g118290.2.1 | 1.969748 | 7.147988 | 1.74E-05 | 0.000199 | 8202  | 24456  | 14623 | 1590  | 3667  | 1527 |
| Solyc08g067340.2.1 | 1.971382 | 5.302395 | 0.000694 | 0.004661 | 1621  | 9752   | 3003  | 175   | 1179  | 548  |
| Solyc08g078010.2.1 | 1.973712 | 5.23041  | 2.68E-06 | 3.87E-05 | 3042  | 4648   | 3948  | 706   | 513   | 433  |
| Solyc06g065690.2.1 | 1.974056 | 3.617396 | 2.13E-05 | 0.000236 | 591   | 1982   | 1487  | 182   | 274   | 118  |
| Solyc02g094060.2.1 | 1.97485  | 2.841301 | 7.72E-05 | 0.000725 | 513   | 1001   | 754   | 132   | 114   | 74   |
| Solyc01g104710.2.1 | 1.979062 | 4.500938 | 1.03E-06 | 1.69E-05 | 1464  | 3554   | 2361  | 332   | 366   | 302  |
| Solyc01g108530.2.1 | 1.979375 | 3.409172 | 0.0003   | 0.002297 | 1417  | 958    | 649   | 206   | 159   | 107  |
| Solyc07g064330.2.1 | 1.981014 | 5.211955 | 6.12E-07 | 1.07E-05 | 2444  | 6358   | 3476  | 598   | 749   | 362  |
| Solyc10g049210.1.1 | 1.9812   | 3.076732 | 5.75E-05 | 0.000564 | 678   | 1052   | 881   | 151   | 119   | 99   |
| Solyc06g084470.2.1 | 1.98326  | 2.077523 | 0.000651 | 0.004418 | 419   | 407    | 412   | 79    | 64    | 43   |
| Solyc01g105010.2.1 | 1.983702 | 2.675379 | 0.000739 | 0.004918 | 196   | 1089   | 871   | 91    | 155   | 55   |
| Solyc06g065390.2.1 | 1.983743 | 5.426257 | 2.66E-06 | 3.86E-05 | 4296  | 4904   | 3803  | 754   | 652   | 495  |
| Solyc01g101240.2.1 | 1.984538 | 8.054805 | 8.79E-06 | 0.000109 | 20763 | 37326  | 26338 | 4688  | 4795  | 2603 |
| Solyc06g048470.2.1 | 1.985112 | 3.16053  | 5.58E-05 | 0.000549 | 507   | 1221   | 1130  | 131   | 140   | 120  |
| Solyc05g016330.2.1 | 1.987982 | 4.656526 | 1.20E-06 | 1.94E-05 | 1962  | 3496   | 2526  | 469   | 442   | 231  |
| Solyc10g085340.1.1 | 1.99085  | 2.6399   | 0.000106 | 0.000953 | 603   | 791    | 515   | 100   | 120   | 62   |
| Solyc09g065270.2.1 | 1.992444 | 5.621888 | 5.99E-05 | 0.000585 | 5040  | 5281   | 4439  | 1150  | 542   | 444  |
| Solyc03g095490.2.1 | 1.992751 | 3.584989 | 1.05E-05 | 0.000127 | 932   | 1283   | 1441  | 152   | 231   | 154  |
| Solyc11g069170.1.1 | 1.995631 | 2.807729 | 9.17E-05 | 0.000839 | 363   | 1194   | 775   | 100   | 122   | 87   |
| Solyc02g082260.2.1 | 1.996326 | 4.100222 | 0.000137 | 0.001185 | 959   | 4295   | 961   | 361   | 207   | 174  |
| Solyc10g081100.1.1 | 1.996666 | 3.960534 | 1.49E-05 | 0.000173 | 1474  | 1642   | 1562  | 307   | 213   | 160  |
| Solyc09g008240.2.1 | 1.997311 | 5.029922 | 2.45E-06 | 3.58E-05 | 1652  | 4587   | 4354  | 503   | 690   | 311  |
| Solyc07g007670.2.1 | 1.998169 | 5.163047 | 2.11E-06 | 3.16E-05 | 3055  | 4725   | 3431  | 711   | 615   | 293  |
| Solyc11g009050.1.1 | 1.998435 | 2.468984 | 0.000144 | 0.001229 | 323   | 819    | 646   | 83    | 103   | 61   |
| Solyc07g032710.2.1 | 1.998954 | 2.345298 | 0.001619 | 0.009517 | 234   | 884    | 585   | 114   | 99    | 22   |
| Solyc11g022400.1.1 | 2.002169 | 3.235699 | 1.92E-05 | 0.000215 | 617   | 1510   | 953   | 157   | 176   | 91   |
| Solyc03g120530.2.1 | 2.002181 | 1.684933 | 0.001622 | 0.00953  | 110   | 542    | 423   | 42    | 69    | 34   |
| Solyc02g092480.2.1 | 2.002394 | 3.441278 | 3.05E-05 | 0.000325 | 613   | 1685   | 1259  | 99    | 248   | 146  |
| Solyc01g111320.2.1 | 2.002782 | 3.308438 | 0.000141 | 0.001206 | 340   | 1815   | 1241  | 119   | 220   | 113  |
| Solyc03g113630.2.1 | 2.003631 | 4.19913  | 1.93E-06 | 2.95E-05 | 1247  | 2873   | 1865  | 310   | 392   | 147  |
| Solyc05g006920.2.1 | 2.006865 | 4.343747 | 1.25E-05 | 0.000148 | 2015  | 2287   | 1843  | 159   | 498   | 274  |
| Solyc09g007280.2.1 | 2.008087 | 3.922516 | 0.000126 | 0.001103 | 483   | 2956   | 1844  | 142   | 404   | 166  |
| Solyc07g007270.2.1 | 2.008102 | 3.032065 | 0.000937 | 0.006009 | 556   | 1339   | 785   | 30    | 238   | 115  |
| Solyc03g114030.2.1 | 2.008661 | 4.08827  | 1.47E-05 | 0.000171 | 665   | 3003   | 2117  | 219   | 353   | 196  |
| Solyc10g086730.1.1 | 2.009501 | 5.128325 | 0.000301 | 0.002304 | 4933  | 3363   | 1743  | 804   | 490   | 253  |
| Solyc02g092560.2.1 | 2.009806 | 6.181742 | 1.99E-05 | 0.000223 | 7906  | 9342   | 5018  | 1362  | 1030  | 769  |
| Solyc08g082190.2.1 | 2.010087 | 9.557308 | 5.22E-05 | 0.000518 | 38230 | 139320 | 79586 | 15056 | 12302 | 6311 |
| Solyc10g080190.1.1 | 2.010235 | 3.373846 | 7.00E-06 | 8.95E-05 | 786   | 1481   | 1036  | 136   | 197   | 127  |
| Solyc03g097950.2.1 | 2.010299 | 4.210082 | 1.35E-05 | 0.000158 | 1506  | 2355   | 1918  | 408   | 237   | 160  |
| Solyc01g105180.2.1 | 2.010434 | 3.256562 | 0.001364 | 0.008258 | 337   | 1939   | 1068  | 41    | 219   | 164  |
| Solyc07g061740.2.1 | 2.014223 | 4.65528  | 0.001172 | 0.007263 | 3652  | 1952   | 1435  | 660   | 213   | 195  |
| Solyc02g088490.2.1 | 2.014248 | 4.79014  | 3.86E-07 | 7.13E-06 | 1745  | 4672   | 2772  | 365   | 485   | 362  |
| Solyc11g005080.1.1 | 2.015146 | 3.574741 | 5.30E-06 | 7.05E-05 | 993   | 1857   | 986   | 201   | 217   | 114  |
| Solyc03g051810.2.1 | 2.01524  | 4.109717 | 4.32E-06 | 5.89E-05 | 1706  | 1867   | 1629  | 311   | 297   | 160  |
| Solyc03g019880.2.1 | 2.015287 | 4.824257 | 8.92E-07 | 1.49E-05 | 2357  | 3862   | 2721  | 534   | 435   | 275  |
| Solyc02g070770.2.1 | 2.015669 | 3.929025 | 2.20E-06 | 3.27E-05 | 1019  | 1973   | 1830  | 220   | 273   | 179  |
| Solyc11g062350.1.1 | 2.015672 | 2.040401 | 0.000245 | 0.001934 | 283   | 679    | 381   | 52    | 89    | 44   |
| Solyc08g007000.2.1 | 2.015921 | 2.308324 | 0.001332 | 0.008087 | 199   | 980    | 533   | 30    | 121   | 72   |
| Solyc01g005210.2.1 | 2.017618 | 6.511198 | 2.01E-06 | 3.03E-05 | 6984  | 13960  | 8580  | 1410  | 1703  | 962  |
| Solyc08g041710.2.1 | 2.017902 | 3.177851 | 0.000111 | 0.000993 | 357   | 1734   | 1032  | 116   | 217   | 85   |
| Solyc10g044710.1.1 | 2.019745 | 2.349195 | 0.000295 | 0.002267 | 446   | 680    | 461   | 103   | 83    | 39   |
| Solyc09g014760.2.1 | 2.020448 | 5.524843 | 3.94E-06 | 5.44E-05 | 3021  | 7043   | 4956  | 926   | 781   | 353  |
| Solyc08g081210.2.1 | 2.020501 | 3.928512 | 2.16E-06 | 3.22E-05 | 990   | 2547   | 1502  | 168   | 348   | 176  |
| Solyc09g007410.2.1 | 2.021891 | 2.317064 | 0.000286 | 0.002209 | 330   | 632    | 603   | 47    | 100   | 71   |
| Solyc04g054190.2.1 | 2.022449 | 4.373042 | 1.95E-05 | 0.000219 | 2511  | 2821   | 1020  | 319   | 401   | 208  |
| Solyc01g103230.2.1 | 2.022483 | 4.130147 | 1.54E-05 | 0.000178 | 673   | 3073   | 2215  | 220   | 327   | 223  |
| Solyc07g017510.2.1 | 2.023174 | 8.012573 | 5.82E-05 | 0.00057  | 23839 | 35798  | 21704 | 5681  | 4186  | 1692 |
| Solyc01g102350.2.1 | 2.023585 | 4.543568 | 7.46E-05 | 0.000704 | 1154  | 3903   | 2760  | 187   | 797   | 173  |
| Solyc12g007230.1.1 | 2.024566 | 3.333204 | 0.000143 | 0.001225 | 528   | 1660   | 1166  | 91    | 325   | 76   |
| Solyc09g064720.2.1 | 2.028635 | 4.607966 | 5.61E-07 | 9.94E-06 | 1623  | 3624   | 2665  | 415   | 417   | 242  |
| Solyc11g005640.1.1 | 2.028939 | 1.958571 | 0.000607 | 0.004159 | 438   | 397    | 307   | 60    | 80    | 34   |
| Solyc10g006030.2.1 | 2.030072 | 5.300843 | 0.000121 | 0.001065 | 4236  | 3851   | 3599  | 979   | 369   | 317  |
| Solyc06g076270.2.1 | 2.030671 | 2.407805 | 0.000319 | 0.002424 | 219   | 1055   | 565   | 67    | 118   | 54   |
| Solyc01g106580.2.1 | 2.031108 | 2.935904 | 0.00024  | 0.001905 | 314   | 1099   | 1093  | 69    | 159   | 108  |
| Solyc03g116320.2.1 | 2.0346   | 3.314523 | 0.000503 | 0.003537 | 1206  | 1310   | 515   | 237   | 114   | 74   |
| Solyc05g009080.2.1 | 2.036314 | 1.556403 | 0.00114  | 0.007095 | 265   | 509    | 178   | 56    | 44    | 26   |
| Solyc01g087040.2.1 | 2.040622 | 4.062697 | 0.000333 | 0.002516 | 2241  | 1427   | 1104  | 382   | 155   | 158  |
| Solyc08g008630.2.1 | 2.040892 | 4.323987 | 0.000237 | 0.001883 | 2606  | 1868   | 1325  | 483   | 239   | 138  |
| Solyc10g081770.1.1 | 2.041117 | 2.458887 | 0.000655 | 0.00444  | 335   | 568    | 790   | 37    | 147   | 67   |
| Solyc07g039380.2.1 | 2.041334 | 2.829213 | 3.32E-05 | 0.00035  | 645   | 900    | 657   | 93    | 146   | 76   |
| Solyc02g071260.2.1 | 2.041397 | 4.162546 | 1.61E-06 | 2.51E-05 | 1606  | 2436   | 1593  | 327   | 304   | 156  |
| Solyc08g065220.2.1 | 2.042396 | 7.14984  | 0.001115 | 0.006963 | 23690 | 8780   | 5862  | 2355  | 2426  | 1433 |
| Solyc01g008230.2.1 | 2.042881 | 4.413574 | 4.17E-05 | 0.000427 | 936   | 3361   | 2813  | 147   | 467   | 322  |
| Solyc11g027260.1.1 | 2.043474 | 4.277776 | 0.000596 | 0.004088 | 2872  | 1386   | 1123  | 452   | 229   | 147  |
| Solyc01g067630.2.1 | 2.045988 | 2.060491 | 0.000341 | 0.002562 | 237   | 629    | 491   | 74    | 68    | 38   |
| Solyc03g097670.2.1 | 2.046488 | 4.939023 | 8.84E-07 | 1.48E-05 | 1588  | 5426   | 3388  | 376   | 708   | 307  |
| Solyc01g086810.2.1 | 2.048163 | 4.465983 | 4.74E-06 | 6.41E-05 | 1380  | 3691   | 2284  | 167   | 491   | 316  |
| Solyc05g050630.2.1 | 2.048792 | 3.728389 | 1.49E-06 | 2.34E-05 | 926   | 2035   | 1356  | 165   | 246   | 164  |
| Solyc09g090840.2.1 | 2.049765 | 3.80146  | 2.84E-06 | 4.08E-05 | 790   | 2099   | 1683  | 199   | 280   | 139  |
| Solyc09g064430.2.1 | 2.051036 | 4.810285 | 1.69E-06 | 2.61E-05 | 2991  | 3365   | 2213  | 495   | 443   | 274  |

|                     |          |          |          |          |       |       |       |      |      |      |
|---------------------|----------|----------|----------|----------|-------|-------|-------|------|------|------|
| Solyc03g081260.2.1  | 2.051351 | 3.503857 | 5.87E-05 | 0.000574 | 1360  | 1075  | 883   | 107  | 283  | 125  |
| Solyc03g112950.2.1  | 2.05139  | 4.304631 | 6.86E-07 | 1.18E-05 | 1155  | 3559  | 1976  | 270  | 351  | 234  |
| Solyc07g007800.2.1  | 2.051769 | 2.239522 | 0.000421 | 0.003056 | 377   | 959   | 267   | 77   | 96   | 37   |
| Solyc01g007890.1.1  | 2.052174 | 3.435015 | 5.39E-05 | 0.000533 | 675   | 1871  | 1071  | 71   | 250  | 156  |
| Solyc01g091780.2.1  | 2.052805 | 3.648836 | 7.51E-06 | 9.54E-05 | 1139  | 1622  | 1152  | 181  | 161  | 176  |
| Solyc10g079830.1.1  | 2.054781 | 2.822249 | 2.96E-05 | 0.000316 | 518   | 1061  | 705   | 79   | 147  | 84   |
| Solyc02g083500.2.1  | 2.056607 | 3.882377 | 5.96E-06 | 7.83E-05 | 1046  | 1993  | 1668  | 278  | 187  | 154  |
| Solyc01g080300.2.1  | 2.056695 | 2.435238 | 0.000122 | 0.001072 | 398   | 721   | 591   | 57   | 903  | 78   |
| Solyc11g067050.1.1  | 2.058168 | 4.20188  | 4.19E-06 | 5.75E-05 | 1162  | 2793  | 2070  | 148  | 450  | 228  |
| Solyc07g005870.2.1  | 2.058538 | 2.465528 | 0.000135 | 0.001166 | 338   | 867   | 606   | 100  | 95   | 45   |
| Solyc01g097860.2.1  | 2.059673 | 4.840848 | 2.39E-06 | 3.51E-05 | 2814  | 3535  | 2507  | 557  | 477  | 219  |
| Solyc08g079070.2.1  | 2.060126 | 5.688223 | 3.59E-07 | 6.70E-06 | 3533  | 7797  | 5503  | 725  | 914  | 589  |
| Solyc04g077390.2.1  | 2.06173  | 5.549405 | 1.36E-05 | 0.000159 | 2839  | 9418  | 3971  | 324  | 1187 | 599  |
| Solyc01g111930.2.1  | 2.062145 | 3.252225 | 0.000101 | 0.000915 | 950   | 1108  | 850   | 208  | 110  | 81   |
| Solyc06g066430.2.1  | 2.062755 | 1.879641 | 0.000649 | 0.004408 | 249   | 446   | 454   | 28   | 75   | 54   |
| Solyc02g071590.1.1  | 2.063327 | 2.122351 | 0.00094  | 0.00603  | 498   | 487   | 315   | 92   | 73   | 25   |
| Solyc04g008370.1.1  | 2.066946 | 2.850905 | 0.000101 | 0.00091  | 305   | 1136  | 965   | 101  | 142  | 72   |
| Solyc06g008300.2.1  | 2.068233 | 3.931729 | 0.000116 | 0.00103  | 977   | 2918  | 1320  | 73   | 458  | 177  |
| Solyc02g080990.1.1  | 2.068306 | 2.723435 | 5.83E-05 | 0.000571 | 374   | 1030  | 771   | 100  | 102  | 76   |
| Solyc09g011300.2.1  | 2.068508 | 3.601708 | 6.85E-06 | 8.80E-05 | 663   | 1927  | 1439  | 130  | 232  | 159  |
| Solyc08g005490.2.1  | 2.068623 | 5.481696 | 2.02E-06 | 3.04E-05 | 4180  | 5326  | 4308  | 387  | 1076 | 535  |
| Solyc03g005280.2.1  | 2.069309 | 3.465604 | 7.84E-05 | 0.000733 | 724   | 949   | 1672  | 199  | 145  | 117  |
| Solyc07g009150.2.1  | 2.069597 | 2.641773 | 6.82E-05 | 0.000651 | 332   | 1105  | 671   | 77   | 130  | 66   |
| Solyc04g009560.2.1  | 2.069873 | 3.997635 | 3.58E-06 | 4.99E-05 | 910   | 2477  | 1890  | 147  | 336  | 211  |
| Solyc11g067060.1.1  | 2.070984 | 4.25816  | 9.46E-06 | 0.000116 | 1489  | 2540  | 2046  | 417  | 253  | 143  |
| Solyc04g078610.2.1  | 2.071189 | 4.75351  | 3.02E-07 | 5.70E-06 | 1725  | 3635  | 3320  | 328  | 549  | 302  |
| Solyc07g056580.2.1  | 2.073164 | 2.845298 | 4.34E-05 | 0.000441 | 420   | 1320  | 699   | 74   | 163  | 80   |
| Solyc06g050370.1.1  | 2.073245 | 2.169846 | 0.000574 | 0.00396  | 197   | 748   | 564   | 79   | 91   | 29   |
| Solyc10g079070.1.1  | 2.073407 | 4.857821 | 2.75E-06 | 3.97E-05 | 1693  | 4585  | 3340  | 227  | 665  | 383  |
| Solyc06g030530.2.1  | 2.073556 | 3.56012  | 2.14E-06 | 3.19E-05 | 790   | 1891  | 1208  | 160  | 235  | 120  |
| Solyc03g113270.2.1  | 2.073705 | 7.539347 | 3.64E-06 | 5.08E-05 | 11281 | 31256 | 19817 | 2420 | 3465 | 2145 |
| Solyc08g079630.2.1  | 2.073845 | 2.670331 | 0.000205 | 0.00166  | 334   | 1099  | 709   | 46   | 132  | 94   |
| Solyc08g079310.2.1  | 2.075927 | 3.132998 | 0.000828 | 0.005414 | 958   | 1122  | 618   | 233  | 76   | 53   |
| Solyc04g078900.2.1  | 2.076139 | 2.996448 | 0.000293 | 0.002251 | 658   | 1318  | 637   | 53   | 272  | 59   |
| Solyc08g065360.2.1  | 2.076648 | 3.751013 | 1.19E-06 | 1.93E-05 | 915   | 2219  | 1328  | 181  | 290  | 125  |
| Solyc06g059800.2.1  | 2.076964 | 4.796032 | 1.31E-06 | 2.10E-05 | 2449  | 3912  | 2484  | 228  | 547  | 409  |
| Solyc01g068290.2.1  | 2.077052 | 3.749056 | 3.27E-06 | 4.62E-05 | 1042  | 2014  | 1295  | 240  | 176  | 143  |
| Solyc07g064970.2.1  | 2.077488 | 4.063072 | 1.51E-06 | 2.37E-05 | 994   | 2273  | 2135  | 185  | 343  | 198  |
| Solyc06g068210.1.1  | 2.0783   | 2.564661 | 0.00013  | 0.001133 | 520   | 846   | 512   | 45   | 136  | 77   |
| Solyc09g083350.2.1  | 2.078934 | 5.053823 | 5.44E-08 | 1.25E-06 | 2626  | 4979  | 3158  | 474  | 583  | 365  |
| Solyc03g093800.1.1  | 2.079323 | 3.64375  | 4.23E-06 | 5.79E-05 | 958   | 2395  | 885   | 171  | 269  | 113  |
| Solyc01g096450.2.1  | 2.080188 | 3.128509 | 0.000154 | 0.001299 | 678   | 737   | 1204  | 175  | 127  | 69   |
| Solyc03g119080.2.1  | 2.080868 | 7.182588 | 4.96E-05 | 0.000496 | 7229  | 18807 | 21038 | 1174 | 3683 | 1673 |
| Solyc08g077430.2.1  | 2.08096  | 4.839038 | 4.16E-07 | 7.61E-06 | 1833  | 5017  | 2791  | 276  | 594  | 368  |
| Solyc02g093080.2.1  | 2.081397 | 3.539835 | 4.52E-05 | 0.000457 | 514   | 1944  | 1471  | 99   | 211  | 177  |
| Solyc02g084020.2.1  | 2.081937 | 3.835137 | 5.45E-05 | 0.000538 | 789   | 2488  | 1549  | 81   | 393  | 172  |
| Solyc07g049320.2.1  | 2.083589 | 1.493243 | 0.000896 | 0.00578  | 213   | 318   | 333   | 45   | 53   | 35   |
| Solyc05g006970.2.1  | 2.083764 | 2.453893 | 0.000293 | 0.002251 | 340   | 841   | 613   | 36   | 150  | 61   |
| Solyc04g077670.2.1  | 2.084881 | 1.940622 | 0.000882 | 0.005709 | 151   | 633   | 505   | 64   | 80   | 25   |
| Solyc07g043160.1.1  | 2.086042 | 3.47747  | 1.68E-05 | 0.000193 | 1036  | 1422  | 1017  | 199  | 124  | 129  |
| Solyc07g056640.1.1  | 2.086376 | 1.990889 | 0.000923 | 0.005944 | 404   | 366   | 402   | 78   | 38   | 43   |
| Solyc08g061630.2.1  | 2.086961 | 2.831263 | 0.000134 | 0.001159 | 636   | 758   | 774   | 147  | 107  | 49   |
| Solyc04g080140.2.1  | 2.087247 | 2.978646 | 3.28E-05 | 0.000348 | 403   | 1399  | 875   | 100  | 171  | 75   |
| Solyc08g042050.2.1  | 2.089731 | 6.476399 | 1.28E-06 | 2.04E-05 | 5632  | 14053 | 9822  | 1110 | 1643 | 1048 |
| Solyc03g113610.2.1  | 2.089966 | 3.178115 | 0.000105 | 0.00094  | 344   | 1549  | 1191  | 84   | 185  | 118  |
| Solyc06g069280.2.1  | 2.090207 | 2.774252 | 3.71E-05 | 0.000386 | 465   | 1045  | 724   | 79   | 165  | 61   |
| Solyc01g104410.2.1  | 2.091175 | 3.150755 | 3.09E-05 | 0.000329 | 591   | 1415  | 922   | 70   | 193  | 119  |
| Solyc01g097340.2.1  | 2.09228  | 3.332552 | 0.000466 | 0.003329 | 1132  | 1001  | 862   | 256  | 107  | 56   |
| Solyc04g071140.2.1  | 2.094763 | 8.255426 | 0.000569 | 0.003931 | 41913 | 28121 | 18607 | 7411 | 3263 | 2014 |
| Solyc08g006760.2.1  | 2.095611 | 3.332245 | 0.000424 | 0.003073 | 1507  | 754   | 556   | 184  | 157  | 85   |
| Solyc01g107200.2.1  | 2.09643  | 1.792736 | 0.000646 | 0.004393 | 259   | 453   | 379   | 58   | 33   | 45   |
| Solyc06g034290.2.1  | 2.098042 | 5.192932 | 9.64E-07 | 1.59E-05 | 3908  | 4081  | 3140  | 365  | 787  | 433  |
| Solyc11g068360.1.1  | 2.098377 | 2.094601 | 0.000213 | 0.001716 | 284   | 562   | 513   | 39   | 90   | 53   |
| Solyc01g099180.2.1  | 2.099246 | 3.257799 | 2.98E-05 | 0.000318 | 615   | 978   | 1372  | 107  | 184  | 115  |
| Solyc10g074970.1.1  | 2.100724 | 3.369639 | 6.67E-05 | 0.000639 | 362   | 1895  | 1324  | 113  | 184  | 135  |
| Solyc03g019670.2.1  | 2.100973 | 3.61736  | 0.000139 | 0.001194 | 652   | 1945  | 1495  | 57   | 305  | 173  |
| Solyc09g010400.2.1  | 2.10158  | 6.105275 | 2.93E-06 | 4.19E-05 | 6860  | 7873  | 6421  | 994  | 945  | 873  |
| Solyc04g009540.1.1  | 2.101828 | 5.243357 | 1.42E-07 | 2.92E-06 | 2544  | 5360  | 4398  | 564  | 693  | 365  |
| Solyc11g007990.1.1  | 2.102073 | 5.817792 | 3.15E-05 | 0.000334 | 3968  | 8468  | 6024  | 1304 | 742  | 334  |
| Solyc11g010170.1.1  | 2.104924 | 3.659714 | 1.35E-06 | 2.15E-05 | 803   | 1951  | 1412  | 182  | 231  | 125  |
| Solyc04g074050.2.1  | 2.105842 | 3.726552 | 0.000306 | 0.002336 | 594   | 3217  | 1038  | 60   | 332  | 185  |
| Solyc03g119700.2.1  | 2.106409 | 4.343332 | 0.000219 | 0.001754 | 2991  | 1749  | 1052  | 400  | 207  | 209  |
| Solyc10g006330.2.1  | 2.107078 | 2.780893 | 0.000273 | 0.002121 | 759   | 915   | 456   | 150  | 90   | 46   |
| Solyc07g0088670.2.1 | 2.107681 | 2.472418 | 0.000138 | 0.001191 | 578   | 622   | 483   | 90   | 70   | 64   |
| Solyc02g092670.1.1  | 2.108    | 5.86088  | 0.000481 | 0.00342  | 3330  | 9183  | 6869  | 183  | 1934 | 606  |
| Solyc03g078100.2.1  | 2.108499 | 2.010042 | 0.000287 | 0.002215 | 195   | 618   | 518   | 54   | 68   | 45   |
| Solyc06g007680.1.1  | 2.108679 | 2.089168 | 0.000339 | 0.002551 | 262   | 530   | 558   | 35   | 105  | 46   |
| Solyc03g005190.2.1  | 2.110074 | 3.563972 | 4.25E-05 | 0.000434 | 1218  | 1202  | 1143  | 241  | 192  | 72   |
| Solyc06g083680.2.1  | 2.110092 | 5.894145 | 0.000248 | 0.001958 | 8121  | 4794  | 4122  | 1310 | 552  | 530  |
| Solyc02g080320.2.1  | 2.110494 | 2.550845 | 0.000287 | 0.002212 | 232   | 1205  | 630   | 50   | 147  | 61   |
| Solyc12g094380.1.1  | 2.112907 | 3.850591 | 2.83E-05 | 0.000304 | 1812  | 1253  | 1130  | 131  | 299  | 183  |
| Solyc06g083890.2.1  | 2.114805 | 3.058324 | 2.44E-05 | 0.000265 | 432   | 1427  | 959   | 89   | 167  | 97   |
| Solyc06g084460.2.1  | 2.115989 | 3.388897 | 0.00035  | 0.002618 | 360   | 1718  | 1486  | 238  | 128  | 67   |
| Solyc01g068130.2.1  | 2.116141 | 2.360436 | 0.000251 | 0.001973 | 324   | 555   | 722   | 43   | 116  | 61   |

|                    |          |          |          |          |       |       |       |      |      |      |
|--------------------|----------|----------|----------|----------|-------|-------|-------|------|------|------|
| Solyc02g070490.2.1 | 2.116929 | 3.438949 | 5.29E-06 | 7.05E-05 | 1083  | 1390  | 908   | 173  | 186  | 98   |
| Solyc08g083140.2.1 | 2.117543 | 1.56812  | 0.000762 | 0.005047 | 122   | 533   | 355   | 32   | 56   | 35   |
| Solyc08g075280.2.1 | 2.128608 | 5.067411 | 2.27E-06 | 3.36E-05 | 3242  | 5216  | 2398  | 663  | 505  | 236  |
| Solyc09g091580.2.1 | 2.12886  | 5.284106 | 0.000214 | 0.001721 | 3798  | 6093  | 2731  | 1046 | 371  | 175  |
| Solyc01g095700.2.1 | 2.128872 | 5.321049 | 1.10E-07 | 2.34E-06 | 2971  | 5374  | 4508  | 412  | 816  | 466  |
| Solyc10g076740.1.1 | 2.129365 | 2.943442 | 7.44E-05 | 0.000704 | 427   | 1467  | 759   | 54   | 189  | 90   |
| Solyc10g083360.1.1 | 2.129866 | 5.482315 | 1.50E-07 | 3.04E-06 | 3238  | 7355  | 4293  | 641  | 920  | 369  |
| Solyc01g079520.2.1 | 2.130148 | 2.314507 | 0.000166 | 0.001393 | 284   | 741   | 608   | 43   | 95   | 67   |
| Solyc01g105430.2.1 | 2.132959 | 1.887784 | 0.000906 | 0.005843 | 447   | 497   | 193   | 64   | 72   | 22   |
| Solyc12g010380.1.1 | 2.133022 | 3.736638 | 4.36E-05 | 0.000443 | 1646  | 1257  | 1025  | 264  | 174  | 107  |
| Solyc05g009310.2.1 | 2.133588 | 3.902502 | 0.000677 | 0.004564 | 2192  | 724   | 1161  | 314  | 143  | 136  |
| Solyc02g068930.2.1 | 2.133696 | 1.955064 | 0.000278 | 0.002157 | 185   | 666   | 460   | 49   | 82   | 34   |
| Solyc03g098440.2.1 | 2.13509  | 3.281706 | 1.84E-05 | 0.000208 | 911   | 1201  | 922   | 171  | 110  | 105  |
| Solyc01g105030.2.1 | 2.135331 | 4.739789 | 5.24E-05 | 0.000519 | 3672  | 2196  | 1814  | 516  | 314  | 246  |
| Solyc12g035190.1.1 | 2.139362 | 1.76547  | 0.000878 | 0.005686 | 314   | 468   | 289   | 72   | 54   | 16   |
| Solyc02g093140.2.1 | 2.140384 | 4.547907 | 3.61E-07 | 6.72E-06 | 2174  | 2829  | 2302  | 324  | 312  | 296  |
| Solyc10g080490.1.1 | 2.141108 | 2.766955 | 0.000436 | 0.003154 | 861   | 619   | 508   | 146  | 73   | 53   |
| Solyc04g057870.2.1 | 2.142168 | 4.960758 | 1.47E-07 | 3.00E-06 | 1890  | 4875  | 3611  | 495  | 495  | 295  |
| Solyc08g023440.2.1 | 2.142333 | 4.079447 | 1.43E-05 | 0.000166 | 1168  | 2640  | 1782  | 376  | 220  | 100  |
| Solyc06g050130.2.1 | 2.142492 | 2.601641 | 0.000147 | 0.00125  | 354   | 1038  | 654   | 114  | 111  | 33   |
| Solyc02g085870.2.1 | 2.142618 | 5.564256 | 2.47E-06 | 3.60E-05 | 4367  | 7674  | 3473  | 358  | 1181 | 521  |
| Solyc06g062580.2.1 | 2.144622 | 1.957437 | 0.001056 | 0.006526 | 476   | 237   | 378   | 68   | 65   | 34   |
| Solyc02g080260.2.1 | 2.145428 | 2.055993 | 0.000341 | 0.002567 | 212   | 786   | 434   | 44   | 111  | 29   |
| Solyc01g095180.2.1 | 2.146235 | 2.435207 | 8.59E-05 | 0.000794 | 277   | 992   | 586   | 55   | 106  | 63   |
| Solyc09g065030.2.1 | 2.147957 | 3.860324 | 2.48E-05 | 0.00027  | 651   | 2252  | 1979  | 104  | 364  | 161  |
| Solyc02g086050.2.1 | 2.148058 | 2.609868 | 4.97E-05 | 0.000496 | 337   | 1009  | 705   | 80   | 132  | 49   |
| Solyc01g005830.2.1 | 2.148326 | 2.574991 | 0.001707 | 0.009968 | 221   | 1061  | 772   | 20   | 123  | 99   |
| Solyc06g054010.2.1 | 2.148677 | 3.059363 | 0.000139 | 0.001195 | 285   | 1989  | 794   | 107  | 120  | 105  |
| Solyc02g077670.2.1 | 2.149101 | 3.11793  | 9.59E-06 | 0.000118 | 561   | 1398  | 931   | 85   | 176  | 101  |
| Solyc08g074390.2.1 | 2.149323 | 2.133306 | 0.000238 | 0.001894 | 219   | 770   | 502   | 37   | 84   | 58   |
| Solyc08g005010.2.1 | 2.1495   | 6.129775 | 4.06E-06 | 5.59E-05 | 7166  | 9907  | 5215  | 1285 | 982  | 592  |
| Solyc02g093930.2.1 | 2.150324 | 1.821253 | 0.00049  | 0.00347  | 235   | 613   | 334   | 72   | 50   | 22   |
| Solyc09g090410.2.1 | 2.150831 | 4.445185 | 3.60E-05 | 0.000376 | 1999  | 2389  | 2340  | 505  | 188  | 165  |
| Solyc09g005020.1.1 | 2.15127  | 1.083323 | 0.000988 | 0.006275 | 214   | 237   | 188   | 31   | 31   | 22   |
| Solyc01g005540.2.1 | 2.152779 | 3.495835 | 1.51E-05 | 0.000175 | 655   | 1749  | 1350  | 83   | 211  | 164  |
| Solyc10g044780.1.1 | 2.15291  | 2.408026 | 8.69E-05 | 0.000802 | 358   | 747   | 615   | 77   | 116  | 35   |
| Solyc07g008900.2.1 | 2.153985 | 3.609933 | 2.46E-06 | 3.60E-05 | 685   | 1985  | 1435  | 170  | 248  | 100  |
| Solyc08g005430.2.1 | 2.154049 | 2.867633 | 4.78E-05 | 0.00048  | 623   | 1018  | 695   | 49   | 169  | 90   |
| Solyc08g079790.1.1 | 2.155382 | 2.025796 | 0.000725 | 0.004846 | 194   | 668   | 507   | 23   | 79   | 62   |
| Solyc02g086830.2.1 | 2.155578 | 6.322911 | 2.21E-05 | 0.000243 | 8431  | 9395  | 6916  | 1697 | 927  | 596  |
| Solyc09g082830.2.1 | 2.157735 | 5.008334 | 1.93E-06 | 2.94E-05 | 4059  | 3399  | 2186  | 445  | 507  | 353  |
| Solyc03g119740.2.1 | 2.159343 | 3.597282 | 1.85E-06 | 2.83E-05 | 1245  | 1448  | 1055  | 140  | 243  | 123  |
| Solyc01g080700.2.1 | 2.161043 | 1.451901 | 0.001028 | 0.00649  | 155   | 358   | 364   | 54   | 33   | 21   |
| Solyc07g053600.2.1 | 2.161778 | 3.557319 | 1.55E-05 | 0.000179 | 852   | 2081  | 1043  | 77   | 314  | 122  |
| Solyc02g089950.1.1 | 2.16295  | 1.632487 | 0.000294 | 0.00226  | 191   | 480   | 348   | 45   | 43   | 34   |
| Solyc07g006230.1.1 | 2.163703 | 3.011665 | 1.34E-05 | 0.000158 | 583   | 1056  | 947   | 78   | 181  | 82   |
| Solyc10g005920.2.1 | 2.164201 | 5.198063 | 6.61E-08 | 1.49E-06 | 2908  | 5646  | 3510  | 379  | 631  | 473  |
| Solyc01g028830.2.1 | 2.164744 | 4.050197 | 7.56E-06 | 9.59E-05 | 1257  | 2172  | 1884  | 104  | 299  | 259  |
| Solyc07g053710.2.1 | 2.16483  | 4.283378 | 1.30E-07 | 2.70E-06 | 1225  | 3071  | 2201  | 256  | 362  | 189  |
| Solyc03g006600.1.1 | 2.165644 | 2.794265 | 6.34E-05 | 0.000613 | 296   | 1308  | 811   | 83   | 105  | 87   |
| Solyc05g042120.2.1 | 2.166418 | 3.432472 | 5.53E-06 | 7.33E-05 | 628   | 1706  | 1275  | 98   | 202  | 139  |
| Solyc06g048960.2.1 | 2.167308 | 3.280282 | 4.04E-06 | 5.56E-05 | 565   | 1624  | 1090  | 115  | 183  | 102  |
| Solyc02g068050.2.1 | 2.167606 | 4.689476 | 9.35E-08 | 2.01E-06 | 2561  | 3410  | 2182  | 374  | 434  | 248  |
| Solyc09g010360.2.1 | 2.169532 | 2.328061 | 6.53E-05 | 0.000628 | 320   | 795   | 550   | 79   | 77   | 46   |
| Solyc06g083660.2.1 | 2.170127 | 3.566274 | 3.23E-06 | 4.56E-05 | 1172  | 1488  | 1048  | 153  | 153  | 155  |
| Solyc09g011720.2.1 | 2.172734 | 2.131897 | 0.00087  | 0.00565  | 336   | 431   | 576   | 69   | 28   | 63   |
| Solyc02g079020.2.1 | 2.173519 | 3.825059 | 4.66E-07 | 8.41E-06 | 915   | 2566  | 1362  | 155  | 256  | 165  |
| Solyc05g005560.2.1 | 2.173538 | 3.379402 | 8.36E-06 | 0.000104 | 672   | 1332  | 1348  | 89   | 205  | 131  |
| Solyc04g015480.2.1 | 2.174649 | 5.37078  | 7.73E-06 | 9.79E-05 | 4415  | 5023  | 3420  | 868  | 563  | 252  |
| Solyc08g083350.2.1 | 2.175346 | 4.587335 | 4.06E-05 | 0.000417 | 2450  | 2544  | 2362  | 551  | 197  | 183  |
| Solyc08g066120.2.1 | 2.175415 | 4.028111 | 2.72E-07 | 5.23E-06 | 1072  | 2634  | 1753  | 172  | 354  | 160  |
| Solyc01g080460.2.1 | 2.176019 | 6.670032 | 3.92E-06 | 5.41E-05 | 6680  | 18808 | 9527  | 1016 | 2658 | 796  |
| Solyc07g005390.2.1 | 2.177556 | 6.939228 | 0.000151 | 0.001278 | 10854 | 21509 | 8751  | 3022 | 1328 | 578  |
| Solyc05g005760.2.1 | 2.177631 | 2.260589 | 0.000185 | 0.001527 | 392   | 448   | 617   | 80   | 64   | 45   |
| Solyc09g011140.2.1 | 2.17802  | 3.86197  | 3.11E-07 | 5.86E-06 | 1042  | 2463  | 1381  | 208  | 271  | 123  |
| Solyc01g094910.2.1 | 2.178095 | 6.947279 | 0.000809 | 0.005312 | 3728  | 22786 | 16975 | 408  | 2956 | 1785 |
| Solyc03g117040.2.1 | 2.178355 | 6.525173 | 5.32E-07 | 9.49E-06 | 6109  | 15434 | 9543  | 1004 | 1777 | 1010 |
| Solyc05g054340.2.1 | 2.178396 | 3.148777 | 0.000435 | 0.003144 | 385   | 1428  | 1194  | 34   | 212  | 123  |
| Solyc03g096830.2.1 | 2.178583 | 3.05423  | 6.53E-05 | 0.000628 | 980   | 867   | 651   | 152  | 128  | 58   |
| Solyc02g092310.2.1 | 2.182016 | 4.561417 | 0.00043  | 0.003116 | 3526  | 2151  | 1160  | 558  | 211  | 153  |
| Solyc09g065690.2.1 | 2.184561 | 3.132878 | 3.81E-06 | 5.28E-05 | 645   | 1466  | 821   | 115  | 140  | 95   |
| Solyc01g110820.2.1 | 2.184753 | 2.574477 | 0.000137 | 0.001185 | 364   | 1046  | 613   | 38   | 164  | 56   |
| Solyc05g014310.2.1 | 2.187579 | 4.822815 | 5.78E-06 | 7.62E-05 | 3211  | 2990  | 2395  | 567  | 363  | 200  |
| Solyc01g010190.2.1 | 2.188132 | 2.772379 | 0.000622 | 0.004246 | 292   | 1092  | 930   | 28   | 195  | 73   |
| Solyc01g079800.2.1 | 2.190241 | 1.76204  | 0.00019  | 0.001559 | 221   | 510   | 381   | 35   | 76   | 30   |
| Solyc10g086660.1.1 | 2.190697 | 3.443619 | 5.37E-06 | 7.13E-05 | 1069  | 1128  | 1133  | 117  | 250  | 93   |
| Solyc09g014770.2.1 | 2.190772 | 6.544024 | 6.69E-07 | 1.16E-05 | 5590  | 16564 | 9864  | 1062 | 1827 | 951  |
| Solyc12g055940.1.1 | 2.191704 | 3.438531 | 7.34E-06 | 9.36E-05 | 1030  | 1301  | 1059  | 199  | 142  | 88   |
| Solyc09g083260.2.1 | 2.191881 | 1.599053 | 0.001623 | 0.00953  | 153   | 441   | 403   | 13   | 84   | 32   |
| Solyc10g075020.1.1 | 2.193284 | 2.517958 | 0.001505 | 0.008977 | 484   | 771   | 574   | 156  | 39   | 25   |
| Solyc03g044090.2.1 | 2.194175 | 1.967526 | 0.000359 | 0.002668 | 245   | 607   | 442   | 23   | 96   | 44   |
| Solyc01g107690.2.1 | 2.194235 | 2.526078 | 0.000193 | 0.001581 | 245   | 823   | 847   | 62   | 144  | 41   |
| Solyc05g056270.2.1 | 2.1949   | 3.498606 | 2.96E-06 | 4.23E-05 | 633   | 1915  | 1295  | 172  | 152  | 118  |
| Solyc02g082480.2.1 | 2.196324 | 3.281417 | 9.28E-05 | 0.000847 | 306   | 1575  | 1455  | 111  | 223  | 77   |

|                    |          |          |          |          |       |       |       |      |      |      |
|--------------------|----------|----------|----------|----------|-------|-------|-------|------|------|------|
| Solyc07g008310.2.1 | 2.196428 | 3.411474 | 1.63E-06 | 2.52E-05 | 775   | 1396  | 1257  | 151  | 173  | 102  |
| Solyc03g117250.2.1 | 2.197965 | 3.879565 | 3.84E-05 | 0.000398 | 685   | 1404  | 2560  | 144  | 223  | 204  |
| Solyc04g064930.2.1 | 2.199724 | 3.282684 | 3.49E-06 | 4.89E-05 | 898   | 1325  | 885   | 150  | 168  | 77   |
| Solyc06g016770.2.1 | 2.199806 | 3.126988 | 7.77E-05 | 0.000728 | 374   | 1784  | 948   | 59   | 173  | 118  |
| Solyc03g058190.2.1 | 2.200598 | 5.838924 | 2.19E-07 | 4.31E-06 | 4041  | 9233  | 5897  | 866  | 979  | 480  |
| Solyc12g099960.1.1 | 2.200869 | 2.12417  | 0.000648 | 0.004408 | 511   | 539   | 289   | 94   | 49   | 27   |
| Solyc05g014110.2.1 | 2.201478 | 3.278176 | 3.82E-06 | 5.28E-05 | 736   | 1544  | 937   | 84   | 185  | 120  |
| Solyc11g066050.1.1 | 2.204809 | 2.477175 | 7.32E-05 | 0.000694 | 251   | 915   | 726   | 68   | 107  | 51   |
| Solyc02g078570.2.1 | 2.204817 | 0.740565 | 0.001048 | 0.006588 | 123   | 216   | 186   | 19   | 26   | 19   |
| Solyc06g007770.2.1 | 2.204921 | 3.402069 | 7.78E-06 | 9.84E-05 | 526   | 1447  | 1516  | 144  | 190  | 94   |
| Solyc01g007880.2.1 | 2.206773 | 2.964614 | 5.39E-06 | 7.17E-05 | 663   | 1117  | 745   | 115  | 121  | 73   |
| Solyc01g010520.2.1 | 2.207224 | 4.867427 | 5.10E-08 | 1.18E-06 | 2059  | 4521  | 3129  | 272  | 616  | 311  |
| Solyc01g008960.2.1 | 2.209189 | 7.690106 | 9.74E-07 | 1.61E-05 | 13870 | 34078 | 21772 | 2934 | 3769 | 1724 |
| Solyc07g063690.1.1 | 2.209656 | 2.07529  | 0.000733 | 0.004883 | 247   | 398   | 664   | 86   | 43   | 32   |
| Solyc06g053600.2.1 | 2.210355 | 3.680842 | 2.50E-06 | 3.65E-05 | 918   | 1383  | 1736  | 195  | 228  | 98   |
| Solyc06g074460.2.1 | 2.210944 | 2.813523 | 2.94E-05 | 0.000315 | 394   | 1093  | 867   | 63   | 167  | 64   |
| Solyc07g063960.2.1 | 2.211409 | 4.911087 | 5.53E-06 | 7.32E-05 | 2661  | 3617  | 3226  | 645  | 303  | 214  |
| Solyc02g070440.2.1 | 2.211491 | 4.483508 | 3.38E-07 | 6.33E-06 | 1111  | 3847  | 2732  | 237  | 395  | 258  |
| Solyc01g006830.2.1 | 2.213044 | 4.779376 | 5.00E-07 | 8.97E-06 | 2870  | 3504  | 2269  | 221  | 496  | 367  |
| Solyc07g049500.2.1 | 2.215445 | 2.383583 | 0.00015  | 0.001277 | 223   | 1012  | 598   | 45   | 119  | 51   |
| Solyc08g082180.2.1 | 2.215692 | 4.102712 | 2.00E-06 | 3.02E-05 | 886   | 2769  | 2175  | 133  | 342  | 214  |
| Solyc02g094590.2.1 | 2.215931 | 2.740165 | 7.82E-05 | 0.000732 | 266   | 1312  | 784   | 62   | 151  | 63   |
| Solyc09g008790.2.1 | 2.216292 | 3.110982 | 3.29E-06 | 4.63E-05 | 609   | 1546  | 786   | 111  | 149  | 84   |
| Solyc06g007120.2.1 | 2.219762 | 3.240113 | 4.63E-06 | 6.28E-05 | 568   | 1660  | 1004  | 115  | 203  | 73   |
| Solyc03g121180.2.1 | 2.219824 | 5.55819  | 7.42E-08 | 1.64E-06 | 4457  | 6086  | 4448  | 644  | 887  | 388  |
| Solyc02g069130.2.1 | 2.22151  | 2.0313   | 0.000363 | 0.002693 | 350   | 426   | 484   | 75   | 72   | 19   |
| Solyc01g111040.2.1 | 2.222389 | 5.261783 | 6.19E-08 | 1.40E-06 | 3147  | 5634  | 3788  | 630  | 598  | 300  |
| Solyc01g107660.2.1 | 2.224413 | 5.088819 | 0.000197 | 0.001608 | 4210  | 2968  | 2895  | 846  | 249  | 194  |
| Solyc11g072110.1.1 | 2.224696 | 1.825113 | 0.000281 | 0.002174 | 174   | 585   | 440   | 43   | 81   | 23   |
| Solyc06g065990.1.1 | 2.224785 | 3.720524 | 0.000657 | 0.004451 | 1747  | 1125  | 985   | 338  | 96   | 66   |
| Solyc09g097820.2.1 | 2.225335 | 4.015212 | 7.30E-05 | 0.000693 | 580   | 3284  | 1935  | 87   | 443  | 159  |
| Solyc02g082690.2.1 | 2.225757 | 2.960363 | 2.84E-05 | 0.000305 | 364   | 1504  | 867   | 124  | 135  | 54   |
| Solyc08g044260.2.1 | 2.225924 | 5.772087 | 2.56E-07 | 4.96E-06 | 4323  | 8835  | 5090  | 893  | 811  | 452  |
| Solyc11g072480.1.1 | 2.226128 | 4.152742 | 2.18E-07 | 4.30E-06 | 1771  | 2171  | 1646  | 225  | 369  | 138  |
| Solyc02g078160.2.1 | 2.226336 | 3.551639 | 1.04E-05 | 0.000126 | 1096  | 2247  | 648   | 202  | 169  | 90   |
| Solyc10g085670.1.1 | 2.226666 | 1.730182 | 0.000455 | 0.003267 | 354   | 275   | 350   | 36   | 79   | 23   |
| Solyc08g042140.2.1 | 2.228413 | 1.982315 | 0.0004   | 0.002924 | 299   | 622   | 382   | 85   | 47   | 21   |
| Solyc02g080980.2.1 | 2.229674 | 2.889751 | 7.90E-06 | 9.95E-05 | 425   | 1221  | 863   | 91   | 117  | 80   |
| Solyc02g089080.2.1 | 2.231832 | 3.149033 | 4.54E-06 | 6.17E-05 | 644   | 1302  | 971   | 142  | 124  | 78   |
| Solyc06g071370.1.1 | 2.232031 | 1.652968 | 0.000356 | 0.002646 | 289   | 373   | 316   | 25   | 45   | 47   |
| Solyc11g027830.1.1 | 2.233057 | 2.239404 | 0.001148 | 0.007139 | 463   | 573   | 438   | 112  | 25   | 35   |
| Solyc09g065150.1.1 | 2.233158 | 0.805239 | 0.00161  | 0.009481 | 197   | 217   | 119   | 25   | 35   | 10   |
| Solyc02g079190.2.1 | 2.233209 | 5.227026 | 2.43E-05 | 0.000265 | 4798  | 4251  | 2368  | 779  | 386  | 267  |
| Solyc03g121120.2.1 | 2.233434 | 3.580609 | 5.77E-06 | 7.61E-05 | 721   | 2161  | 1241  | 82   | 290  | 123  |
| Solyc02g086130.2.1 | 2.23521  | 4.677561 | 2.04E-07 | 4.04E-06 | 1458  | 4229  | 3027  | 225  | 458  | 319  |
| Solyc04g045580.2.1 | 2.235588 | 2.832182 | 8.04E-06 | 0.000101 | 470   | 1142  | 774   | 106  | 107  | 64   |
| Solyc05g018620.2.1 | 2.237607 | 4.106846 | 1.40E-05 | 0.000164 | 1590  | 2810  | 1305  | 376  | 202  | 92   |
| Solyc02g068040.2.1 | 2.238316 | 1.563571 | 0.000934 | 0.005995 | 361   | 365   | 178   | 55   | 45   | 16   |
| Solyc01g105020.2.1 | 2.239796 | 4.504421 | 0.000651 | 0.004418 | 3711  | 1505  | 1122  | 516  | 225  | 128  |
| Solyc10g047050.1.1 | 2.239864 | 3.555453 | 2.79E-06 | 4.01E-05 | 541   | 2294  | 1320  | 136  | 207  | 120  |
| Solyc09g005750.2.1 | 2.240446 | 3.225352 | 1.99E-06 | 3.02E-05 | 705   | 1401  | 977   | 95   | 156  | 111  |
| Solyc02g069290.2.1 | 2.241135 | 5.991957 | 1.55E-06 | 2.41E-05 | 3471  | 11825 | 6926  | 505  | 1400 | 682  |
| Solyc04g076660.2.1 | 2.24135  | 2.28075  | 0.000169 | 0.001408 | 234   | 857   | 582   | 33   | 105  | 56   |
| Solyc12g005240.1.1 | 2.241739 | 2.487701 | 0.000196 | 0.001603 | 523   | 620   | 597   | 119  | 56   | 37   |
| Solyc02g077310.2.1 | 2.241773 | 1.610009 | 0.000682 | 0.004595 | 178   | 521   | 332   | 18   | 44   | 50   |
| Solyc12g021280.1.1 | 2.241952 | 3.779476 | 1.71E-07 | 3.45E-06 | 1181  | 2006  | 1294  | 163  | 202  | 160  |
| Solyc11g071500.1.1 | 2.242574 | 0.629765 | 0.001306 | 0.00795  | 104   | 203   | 184   | 16   | 35   | 11   |
| Solyc10g011770.2.1 | 2.242745 | 4.150018 | 2.37E-05 | 0.000259 | 2097  | 1623  | 1591  | 368  | 217  | 104  |
| Solyc06g069030.2.1 | 2.243798 | 4.488451 | 1.19E-07 | 2.48E-06 | 1491  | 3500  | 2531  | 370  | 318  | 184  |
| Solyc02g068270.2.1 | 2.245765 | 3.883984 | 4.55E-07 | 8.24E-06 | 1480  | 1696  | 1429  | 210  | 264  | 115  |
| Solyc02g077090.2.1 | 2.246068 | 3.66892  | 3.95E-07 | 7.27E-06 | 887   | 2036  | 1343  | 117  | 255  | 135  |
| Solyc03g122270.2.1 | 2.246812 | 5.197136 | 2.68E-05 | 0.000289 | 1144  | 6902  | 5000  | 236  | 834  | 418  |
| Solyc07g005570.2.1 | 2.247269 | 4.490269 | 1.92E-08 | 4.95E-07 | 1643  | 3477  | 2368  | 295  | 335  | 235  |
| Solyc10g054100.1.1 | 2.248973 | 3.06394  | 0.000194 | 0.001589 | 264   | 2296  | 663   | 123  | 159  | 55   |
| Solyc03g117010.2.1 | 2.24956  | 3.813071 | 1.38E-06 | 2.19E-05 | 736   | 2590  | 1572  | 129  | 222  | 184  |
| Solyc12g014420.1.1 | 2.249735 | 1.775317 | 0.000211 | 0.001704 | 224   | 618   | 324   | 24   | 67   | 42   |
| Solyc02g079430.2.1 | 2.250208 | 4.167995 | 7.34E-07 | 1.26E-05 | 964   | 3730  | 1722  | 150  | 350  | 209  |
| Solyc02g084450.2.1 | 2.25224  | 1.937928 | 0.000456 | 0.003272 | 120   | 813   | 449   | 38   | 78   | 36   |
| Solyc10g085980.1.1 | 2.252989 | 2.72819  | 0.000456 | 0.003271 | 791   | 651   | 548   | 143  | 42   | 55   |
| Solyc03g120910.2.1 | 2.253002 | 4.251643 | 5.25E-07 | 9.40E-06 | 2149  | 2143  | 1584  | 289  | 267  | 175  |
| Solyc09g074640.2.1 | 2.254384 | 4.307001 | 2.04E-07 | 4.04E-06 | 1719  | 2566  | 2068  | 331  | 249  | 173  |
| Solyc01g097290.2.1 | 2.256078 | 4.965975 | 1.68E-06 | 2.59E-05 | 1795  | 4763  | 3964  | 235  | 848  | 243  |
| Solyc03g083560.1.1 | 2.256736 | 2.992908 | 0.000329 | 0.002492 | 900   | 780   | 726   | 29   | 149  | 125  |
| Solyc05g005080.2.1 | 2.256974 | 5.179293 | 1.65E-08 | 4.33E-07 | 2625  | 5234  | 4106  | 508  | 513  | 363  |
| Solyc02g085760.2.1 | 2.258491 | 6.211338 | 2.63E-07 | 5.08E-06 | 7245  | 10995 | 5905  | 1064 | 1170 | 651  |
| Solyc02g093210.2.1 | 2.258501 | 2.792052 | 0.000383 | 0.002819 | 247   | 1136  | 1002  | 32   | 158  | 86   |
| Solyc01g008790.2.1 | 2.260378 | 1.868657 | 9.43E-05 | 0.000859 | 206   | 595   | 430   | 41   | 64   | 36   |
| Solyc03g114150.2.1 | 2.262379 | 7.758661 | 3.46E-05 | 0.000364 | 27850 | 22550 | 15144 | 4042 | 2266 | 1800 |
| Solyc01g005520.2.1 | 2.263417 | 4.893031 | 4.59E-06 | 6.23E-05 | 4017  | 2952  | 1915  | 486  | 447  | 222  |
| Solyc09g083030.1.1 | 2.263889 | 2.16715  | 6.18E-05 | 0.000599 | 248   | 683   | 571   | 49   | 88   | 40   |
| Solyc08g078210.2.1 | 2.264526 | 3.657194 | 1.28E-05 | 0.000152 | 1587  | 1432  | 839   | 221  | 183  | 85   |
| Solyc05g012580.1.1 | 2.264601 | 7.250737 | 1.53E-05 | 0.000177 | 16371 | 21303 | 11176 | 2985 | 2080 | 862  |
| Solyc02g030210.2.1 | 2.265451 | 3.18261  | 1.93E-06 | 2.94E-05 | 585   | 1630  | 907   | 103  | 148  | 97   |
| Solyc07g056020.2.1 | 2.265983 | 5.806342 | 7.34E-08 | 1.62E-06 | 4884  | 8629  | 4992  | 791  | 843  | 518  |

|                    |          |          |          |          |       |       |       |      |      |      |
|--------------------|----------|----------|----------|----------|-------|-------|-------|------|------|------|
| Solyc01g010200.2.1 | 2.266555 | 5.869133 | 6.61E-06 | 8.54E-05 | 2408  | 10506 | 7604  | 434  | 1305 | 614  |
| Solyc05g051850.2.1 | 2.267778 | 6.24326  | 1.11E-05 | 0.000133 | 9471  | 9290  | 4747  | 554  | 1822 | 726  |
| Solyc05g015150.2.1 | 2.27003  | 3.420513 | 1.67E-06 | 2.58E-05 | 901   | 1468  | 1104  | 102  | 252  | 84   |
| Solyc11g067140.1.1 | 2.27039  | 1.639056 | 0.000339 | 0.002554 | 227   | 395   | 375   | 41   | 71   | 15   |
| Solyc01g005550.2.1 | 2.27119  | 4.197242 | 2.68E-06 | 3.87E-05 | 648   | 3620  | 2306  | 217  | 322  | 175  |
| Solyc08g066390.2.1 | 2.271803 | 1.167332 | 0.000388 | 0.002852 | 157   | 408   | 195   | 20   | 40   | 25   |
| Solyc03g119860.2.1 | 2.272627 | 2.52405  | 0.000196 | 0.001597 | 746   | 474   | 463   | 103  | 72   | 42   |
| Solyc02g068440.2.1 | 2.2733   | 2.356278 | 2.11E-05 | 0.000234 | 365   | 782   | 551   | 60   | 98   | 43   |
| Solyc06g005560.2.1 | 2.274746 | 1.848658 | 0.000467 | 0.003335 | 159   | 443   | 572   | 27   | 61   | 47   |
| Solyc01g106090.2.1 | 2.276476 | 3.779787 | 0.000115 | 0.001017 | 1658  | 1448  | 1077  | 318  | 108  | 80   |
| Solyc09g082210.2.1 | 2.279393 | 4.366356 | 3.25E-05 | 0.000344 | 876   | 3587  | 2726  | 90   | 446  | 271  |
| Solyc12g100030.1.1 | 2.279646 | 4.432029 | 1.51E-07 | 3.07E-06 | 1992  | 3211  | 1869  | 319  | 413  | 131  |
| Solyc05g014260.2.1 | 2.280698 | 6.095456 | 4.90E-05 | 0.00049  | 4609  | 15009 | 4980  | 1424 | 1010 | 255  |
| Solyc08g008670.2.1 | 2.281138 | 1.226715 | 0.000352 | 0.002627 | 162   | 329   | 268   | 33   | 28   | 24   |
| Solyc08g076480.2.1 | 2.28118  | 5.578533 | 9.60E-08 | 2.06E-06 | 2954  | 7810  | 5513  | 747  | 700  | 383  |
| Solyc01g096480.2.1 | 2.28168  | 3.394352 | 4.79E-05 | 0.000481 | 507   | 1922  | 1248  | 219  | 98   | 71   |
| Solyc03g058160.2.1 | 2.282153 | 3.958177 | 4.06E-07 | 7.45E-06 | 1692  | 1554  | 1506  | 191  | 246  | 155  |
| Solyc01g014320.2.1 | 2.282676 | 1.434851 | 0.000809 | 0.005313 | 93    | 437   | 392   | 41   | 38   | 22   |
| Solyc12g014440.1.1 | 2.285077 | 4.516745 | 3.40E-06 | 4.77E-05 | 849   | 4211  | 3037  | 224  | 314  | 303  |
| Solyc02g077880.2.1 | 2.28525  | 8.147456 | 3.14E-06 | 4.46E-05 | 31228 | 38897 | 20585 | 4560 | 3368 | 2612 |
| Solyc02g079200.1.1 | 2.287072 | 3.801447 | 4.30E-06 | 5.88E-05 | 1250  | 1500  | 1616  | 265  | 161  | 96   |
| Solyc12g099200.1.1 | 2.288509 | 4.978244 | 0.000125 | 0.001096 | 1420  | 5633  | 3988  | 88   | 798  | 383  |
| Solyc03g111120.2.1 | 2.28863  | 1.274587 | 0.000643 | 0.004376 | 156   | 258   | 345   | 20   | 36   | 32   |
| Solyc04g005060.2.1 | 2.288815 | 1.334339 | 0.000597 | 0.004097 | 240   | 405   | 178   | 45   | 38   | 13   |
| Solyc04g081890.1.1 | 2.290437 | 1.58209  | 0.001357 | 0.008224 | 205   | 781   | 121   | 26   | 79   | 18   |
| Solyc12g013840.1.1 | 2.291951 | 2.763237 | 7.37E-05 | 0.000698 | 704   | 1126  | 411   | 105  | 136  | 31   |
| Solyc10g078440.1.1 | 2.292014 | 5.378349 | 1.99E-08 | 5.12E-07 | 3695  | 7030  | 3272  | 598  | 620  | 362  |
| Solyc06g005750.2.1 | 2.292409 | 2.621739 | 0.000225 | 0.001801 | 232   | 1310  | 689   | 102  | 117  | 26   |
| Solyc03g082560.2.1 | 2.29378  | 3.849001 | 1.12E-07 | 2.37E-06 | 1101  | 2071  | 1579  | 205  | 238  | 112  |
| Solyc01g102810.2.1 | 2.293903 | 3.231847 | 2.02E-05 | 0.000225 | 517   | 1623  | 1098  | 56   | 164  | 131  |
| Solyc07g064360.1.1 | 2.294424 | 0.874615 | 0.0008   | 0.005263 | 142   | 227   | 209   | 13   | 33   | 22   |
| Solyc02g077280.2.1 | 2.294614 | 3.977546 | 3.36E-06 | 4.73E-05 | 878   | 2777  | 1803  | 99   | 255  | 228  |
| Solyc03g120230.2.1 | 2.295181 | 2.587387 | 1.63E-05 | 0.000187 | 333   | 923   | 768   | 66   | 97   | 63   |
| Solyc09g060110.2.1 | 2.297425 | 1.739874 | 0.000192 | 0.001576 | 233   | 338   | 473   | 47   | 45   | 31   |
| Solyc11g040040.1.1 | 2.299343 | 2.896085 | 9.26E-06 | 0.000114 | 562   | 901   | 925   | 69   | 104  | 98   |
| Solyc11g066300.1.1 | 2.300283 | 2.026792 | 7.41E-05 | 0.000701 | 246   | 597   | 510   | 63   | 57   | 32   |
| Solyc05g009040.2.1 | 2.300472 | 1.871497 | 0.000824 | 0.005391 | 139   | 1055  | 225   | 42   | 42   | 46   |
| Solyc06g071330.2.1 | 2.300738 | 1.984291 | 0.000371 | 0.002749 | 360   | 408   | 454   | 44   | 29   | 61   |
| Solyc08g080250.2.1 | 2.301396 | 2.774811 | 0.000242 | 0.001915 | 303   | 1179  | 891   | 27   | 149  | 88   |
| Solyc04g074860.2.1 | 2.303564 | 1.428659 | 0.000584 | 0.00402  | 129   | 412   | 362   | 17   | 49   | 34   |
| Solyc08g068200.2.1 | 2.304917 | 3.639321 | 2.00E-06 | 3.03E-05 | 865   | 1919  | 1394  | 78   | 253  | 148  |
| Solyc06g084140.2.1 | 2.30492  | 2.480493 | 0.000121 | 0.001064 | 661   | 674   | 397   | 68   | 132  | 27   |
| Solyc02g090580.2.1 | 2.305132 | 1.929963 | 0.000413 | 0.003006 | 128   | 659   | 538   | 29   | 67   | 46   |
| Solyc01g067800.2.1 | 2.305338 | 4.547182 | 3.71E-07 | 6.89E-06 | 1164  | 3645  | 3170  | 199  | 478  | 234  |
| Solyc05g054350.2.1 | 2.305604 | 5.036889 | 1.31E-05 | 0.000155 | 4601  | 3732  | 1664  | 586  | 434  | 217  |
| Solyc03g080180.2.1 | 2.307203 | 4.981322 | 9.43E-07 | 1.57E-05 | 1719  | 5210  | 3927  | 588  | 399  | 199  |
| Solyc05g050500.1.1 | 2.308019 | 4.02947  | 2.47E-06 | 3.60E-05 | 1709  | 2259  | 1284  | 304  | 223  | 92   |
| Solyc11g020670.1.1 | 2.308465 | 4.360603 | 7.07E-08 | 1.57E-06 | 1347  | 4158  | 1774  | 272  | 261  | 218  |
| Solyc07g040950.2.1 | 2.311214 | 3.965821 | 7.01E-08 | 1.56E-06 | 1580  | 1962  | 1425  | 194  | 250  | 145  |
| Solyc09g005260.2.1 | 2.311468 | 8.803702 | 6.50E-07 | 1.13E-05 | 46321 | 56341 | 39603 | 5713 | 7847 | 3653 |
| Solyc12g100160.1.1 | 2.312299 | 5.522825 | 9.86E-08 | 2.11E-06 | 4154  | 5468  | 5030  | 728  | 565  | 400  |
| Solyc03g083610.2.1 | 2.314708 | 3.854313 | 1.84E-06 | 2.83E-05 | 770   | 2070  | 2016  | 108  | 313  | 144  |
| Solyc01g005030.2.1 | 2.31473  | 4.679284 | 4.22E-06 | 5.78E-05 | 1171  | 4516  | 3281  | 142  | 563  | 292  |
| Solyc01g100190.2.1 | 2.315929 | 2.376468 | 0.000265 | 0.002072 | 209   | 996   | 636   | 26   | 119  | 57   |
| Solyc04g081370.2.1 | 2.317289 | 4.333608 | 7.86E-07 | 1.34E-05 | 1689  | 3358  | 1755  | 120  | 487  | 196  |
| Solyc12g007010.1.1 | 2.317322 | 5.391232 | 0.00022  | 0.001766 | 6362  | 3714  | 2226  | 946  | 395  | 202  |
| Solyc05g006000.2.1 | 2.317358 | 2.160857 | 4.07E-05 | 0.000418 | 313   | 523   | 595   | 49   | 72   | 45   |
| Solyc08g077880.2.1 | 2.318534 | 6.075939 | 1.05E-07 | 2.23E-06 | 4242  | 12454 | 6877  | 902  | 936  | 654  |
| Solyc07g006220.1.1 | 2.31915  | 5.381345 | 2.20E-06 | 3.28E-05 | 1506  | 8562  | 5075  | 380  | 922  | 348  |
| Solyc12g096030.1.1 | 2.320379 | 2.957473 | 4.29E-05 | 0.000437 | 294   | 1381  | 1052  | 70   | 102  | 105  |
| Solyc02g068090.2.1 | 2.322883 | 6.485062 | 7.55E-05 | 0.00071  | 10646 | 8225  | 8229  | 1922 | 620  | 633  |
| Solyc03g111600.2.1 | 2.323064 | 2.505286 | 2.05E-05 | 0.000229 | 347   | 845   | 707   | 85   | 70   | 51   |
| Solyc08g082680.2.1 | 2.323563 | 1.964508 | 0.00043  | 0.003114 | 429   | 414   | 352   | 27   | 39   | 66   |
| Solyc02g077050.2.1 | 2.323935 | 3.531379 | 7.67E-06 | 9.71E-05 | 1152  | 1870  | 812   | 106  | 306  | 64   |
| Solyc06g068480.2.1 | 2.324121 | 4.422152 | 5.59E-05 | 0.00055  | 2385  | 2301  | 1950  | 500  | 192  | 92   |
| Solyc03g083570.2.1 | 2.324622 | 3.31735  | 3.79E-07 | 7.03E-06 | 815   | 1585  | 935   | 119  | 174  | 85   |
| Solyc05g013720.2.1 | 2.324887 | 4.894589 | 1.94E-08 | 4.99E-07 | 2006  | 5598  | 2795  | 263  | 609  | 280  |
| Solyc09g007940.2.1 | 2.326163 | 1.376137 | 0.001169 | 0.007249 | 79    | 376   | 420   | 39   | 29   | 24   |
| Solyc01g088100.2.1 | 2.327006 | 6.407059 | 0.000209 | 0.001691 | 3120  | 16716 | 10761 | 281  | 2382 | 809  |
| Solyc07g056040.2.1 | 2.328239 | 3.545561 | 1.76E-07 | 3.53E-06 | 778   | 1931  | 1270  | 147  | 175  | 110  |
| Solyc03g005230.2.1 | 2.328572 | 7.406981 | 0.000368 | 0.002728 | 23917 | 16112 | 10656 | 3982 | 1315 | 826  |
| Solyc12g005030.1.1 | 2.328604 | 3.213374 | 6.58E-07 | 1.14E-05 | 779   | 1331  | 936   | 118  | 144  | 83   |
| Solyc01g111660.2.1 | 2.328915 | 2.694404 | 0.000266 | 0.002074 | 759   | 429   | 701   | 118  | 50   | 58   |
| Solyc09g065920.2.1 | 2.329493 | 2.397266 | 0.00067  | 0.004527 | 169   | 1183  | 591   | 22   | 133  | 53   |
| Solyc09g065480.1.1 | 2.330084 | 2.601229 | 1.77E-05 | 0.000201 | 433   | 1031  | 599   | 84   | 59   | 69   |
| Solyc08g081080.2.1 | 2.330882 | 3.425723 | 2.67E-05 | 0.000289 | 453   | 1918  | 1405  | 60   | 250  | 110  |
| Solyc09g018510.2.1 | 2.331394 | 4.437445 | 8.20E-07 | 1.39E-05 | 2031  | 2561  | 2296  | 402  | 223  | 158  |
| Solyc09g005230.2.1 | 2.331729 | 2.408335 | 9.19E-05 | 0.00084  | 472   | 645   | 572   | 104  | 53   | 34   |
| Solyc03g097650.2.1 | 2.331886 | 0.810193 | 0.001709 | 0.009969 | 124   | 212   | 220   | 15   | 49   | 7    |
| Solyc04g077320.1.1 | 2.333927 | 0.990755 | 0.000955 | 0.006102 | 135   | 338   | 194   | 12   | 25   | 31   |
| Solyc10g005790.2.1 | 2.334431 | 3.17723  | 5.11E-06 | 6.84E-05 | 866   | 1020  | 959   | 100  | 99   | 117  |
| Solyc11g066820.1.1 | 2.335278 | 3.821399 | 2.53E-06 | 3.69E-05 | 829   | 2342  | 1683  | 90   | 353  | 121  |
| Solyc05g051740.2.1 | 2.337595 | 1.129237 | 0.000811 | 0.00532  | 270   | 178   | 191   | 32   | 30   | 17   |
| Solyc09g092270.2.1 | 2.338447 | 4.685735 | 0.000539 | 0.003756 | 2977  | 3858  | 1517  | 682  | 153  | 83   |

|                     |          |          |          |          |       |       |       |      |      |      |
|---------------------|----------|----------|----------|----------|-------|-------|-------|------|------|------|
| Solyc09g064520.2.1  | 2.338525 | 1.117677 | 0.000274 | 0.002126 | 179   | 299   | 220   | 21   | 31   | 25   |
| Solyc01g067480.2.1  | 2.340378 | 2.797433 | 6.45E-06 | 8.38E-05 | 431   | 1173  | 777   | 91   | 80   | 75   |
| Solyc01g065750.2.1  | 2.340567 | 0.763855 | 0.001029 | 0.006493 | 97    | 264   | 203   | 29   | 22   | 10   |
| Solyc06g009400.2.1  | 2.341651 | 5.975322 | 2.60E-07 | 5.04E-06 | 3922  | 9485  | 7861  | 954  | 735  | 574  |
| Solyc06g076570.1.1  | 2.342659 | 3.124685 | 2.56E-06 | 3.73E-05 | 814   | 1053  | 909   | 127  | 108  | 79   |
| Solyc01g110340.2.1  | 2.342782 | 2.48298  | 0.000346 | 0.002591 | 804   | 470   | 360   | 89   | 101  | 25   |
| Solyc07g025510.2.1  | 2.344577 | 1.420286 | 0.000191 | 0.00157  | 155   | 397   | 339   | 33   | 48   | 19   |
| Solyc05g013460.2.1  | 2.345307 | 3.923223 | 7.34E-08 | 1.62E-06 | 904   | 2451  | 1833  | 192  | 238  | 132  |
| Solyc02g081480.2.1  | 2.346421 | 1.85286  | 7.54E-05 | 0.00071  | 282   | 593   | 337   | 37   | 82   | 22   |
| Solyc01g097520.2.1  | 2.347835 | 4.675906 | 6.65E-06 | 8.58E-05 | 700   | 4740  | 3733  | 303  | 458  | 206  |
| Solyc02g088100.2.1  | 2.347851 | 1.877769 | 0.000228 | 0.001818 | 397   | 471   | 292   | 23   | 96   | 27   |
| Solyc06g062400.1.1  | 2.348767 | 1.234062 | 0.000853 | 0.005554 | 92    | 577   | 204   | 19   | 35   | 29   |
| Solyc04g054480.2.1  | 2.349189 | 6.776309 | 2.18E-07 | 4.30E-06 | 6767  | 16699 | 13709 | 1039 | 1980 | 1090 |
| Solyc10g052490.1.1  | 2.349975 | 6.489512 | 4.59E-06 | 6.23E-05 | 3790  | 15612 | 12191 | 665  | 2003 | 824  |
| Solyc07g056240.2.1  | 2.35085  | 2.160252 | 0.000495 | 0.003489 | 651   | 541   | 170   | 66   | 501  | 41   |
| Solyc05g054760.2.1  | 2.351057 | 7.705867 | 5.29E-06 | 7.04E-05 | 8143  | 31637 | 32130 | 2559 | 3232 | 1911 |
| Solyc05g012600.2.1  | 2.351531 | 3.5274   | 1.94E-06 | 2.96E-05 | 620   | 1777  | 1529  | 91   | 179  | 145  |
| Solyc04g076740.2.1  | 2.351709 | 2.888827 | 1.57E-06 | 2.45E-05 | 544   | 1159  | 785   | 82   | 107  | 78   |
| Solyc07g005010.2.1  | 2.354758 | 2.690316 | 1.32E-05 | 0.000156 | 361   | 1028  | 812   | 51   | 134  | 60   |
| Solyc09g092670.2.1  | 2.35479  | 2.303341 | 2.59E-05 | 0.00028  | 290   | 731   | 635   | 44   | 88   | 50   |
| Solyc02g067090.2.1  | 2.355351 | 4.809105 | 1.94E-08 | 5.00E-07 | 1708  | 5164  | 2959  | 237  | 493  | 306  |
| Solyc01g088670.1.1  | 2.356273 | 1.671314 | 0.000167 | 0.001387 | 180   | 500   | 395   | 21   | 58   | 37   |
| Solyc03g005010.2.1  | 2.35662  | 3.806596 | 3.20E-08 | 7.79E-07 | 964   | 2420  | 1432  | 163  | 229  | 125  |
| Solyc05g011820.1.1  | 2.357674 | 0.531674 | 0.001403 | 0.008463 | 62    | 235   | 190   | 20   | 20   | 11   |
| Solyc09g075940.2.1  | 2.358311 | 1.622544 | 0.000512 | 0.003596 | 256   | 294   | 401   | 21   | 33   | 49   |
| Solyc09g007190.2.1  | 2.358618 | 3.741006 | 0.000445 | 0.003204 | 1940  | 1101  | 879   | 313  | 122  | 47   |
| Solyc02g089250.2.1  | 2.359499 | 4.223586 | 4.03E-05 | 0.000415 | 2561  | 1347  | 1541  | 361  | 166  | 131  |
| Solyc09g098040.2.1  | 2.35981  | 6.99317  | 8.56E-07 | 1.44E-05 | 13087 | 16541 | 11332 | 2105 | 1612 | 913  |
| Solyc07g055720.2.1  | 2.360129 | 4.26528  | 0.000489 | 0.003467 | 3448  | 750   | 987   | 315  | 248  | 136  |
| Solyc11g011210.1.1  | 2.36073  | 0.626979 | 0.000871 | 0.005653 | 150   | 161   | 159   | 17   | 19   | 17   |
| Solyc05g012620.2.1  | 2.360867 | 3.431926 | 8.24E-05 | 0.000767 | 1399  | 1124  | 764   | 225  | 88   | 66   |
| Solyc01g109930.2.1  | 2.362722 | 2.272241 | 2.08E-05 | 0.000231 | 276   | 800   | 578   | 50   | 82   | 45   |
| Solyc05g014100.1.1  | 2.364064 | 3.727366 | 4.71E-08 | 1.10E-06 | 927   | 2313  | 1326  | 161  | 222  | 108  |
| Solyc01g101100.2.1  | 2.365251 | 4.143915 | 8.58E-08 | 1.87E-06 | 1907  | 2149  | 1543  | 232  | 217  | 177  |
| Solyc07g007020.2.1  | 2.365402 | 1.159526 | 0.000385 | 0.00283  | 161   | 365   | 221   | 13   | 40   | 27   |
| Solyc11g069710.1.1  | 2.366535 | 2.334526 | 0.000301 | 0.002305 | 220   | 878   | 662   | 20   | 113  | 57   |
| Solyc09g083130.2.1  | 2.367359 | 4.492234 | 0.000123 | 0.001079 | 2844  | 2309  | 1727  | 531  | 184  | 86   |
| Solyc07g006200.2.1  | 2.368415 | 3.531992 | 2.23E-07 | 4.38E-06 | 797   | 1550  | 1473  | 113  | 204  | 110  |
| Solyc01g009670.2.1  | 2.368891 | 1.855162 | 0.001116 | 0.006971 | 578   | 257   | 190   | 61   | 44   | 24   |
| Solyc12g009440.1.1  | 2.368904 | 5.924292 | 1.03E-06 | 1.69E-05 | 7230  | 5716  | 5565  | 917  | 851  | 448  |
| Solyc02g090680.2.1  | 2.370568 | 2.83877  | 2.11E-06 | 3.16E-05 | 666   | 1122  | 587   | 89   | 105  | 64   |
| Solyc01g0066020.2.1 | 2.370775 | 6.159387 | 9.67E-05 | 0.000878 | 11309 | 5048  | 4156  | 1289 | 730  | 512  |
| Solyc07g045440.1.1  | 2.371242 | 3.476244 | 6.61E-07 | 1.15E-05 | 626   | 1656  | 1487  | 147  | 179  | 84   |
| Solyc09g074420.2.1  | 2.371265 | 3.771039 | 1.00E-06 | 1.65E-05 | 1109  | 1941  | 1461  | 192  | 109  | 159  |
| Solyc04g074870.2.1  | 2.371385 | 3.26062  | 2.30E-05 | 0.000252 | 1277  | 885   | 710   | 157  | 129  | 62   |
| Solyc06g030540.2.1  | 2.372225 | 0.527874 | 0.001068 | 0.006693 | 96    | 235   | 148   | 22   | 23   | 7    |
| Solyc02g083310.2.1  | 2.373756 | 5.273952 | 9.95E-05 | 0.000899 | 6388  | 2911  | 1804  | 697  | 375  | 287  |
| Solyc08g048240.2.1  | 2.375312 | 2.870128 | 5.28E-06 | 7.03E-05 | 367   | 1173  | 973   | 79   | 127  | 63   |
| Solyc02g080500.2.1  | 2.377897 | 3.87169  | 8.38E-07 | 1.42E-05 | 920   | 2313  | 1758  | 88   | 271  | 175  |
| Solyc11g072500.1.1  | 2.378618 | 2.54863  | 4.97E-05 | 0.000496 | 246   | 800   | 923   | 64   | 75   | 65   |
| Solyc10g006800.2.1  | 2.379174 | 7.320762 | 2.73E-07 | 5.24E-06 | 17210 | 19967 | 13857 | 1782 | 2844 | 1321 |
| Solyc01g008520.2.1  | 2.380314 | 0.748073 | 0.000701 | 0.004706 | 173   | 250   | 115   | 25   | 20   | 13   |
| Solyc03g119310.2.1  | 2.383705 | 2.500117 | 0.000958 | 0.006112 | 97    | 1277  | 746   | 31   | 109  | 66   |
| Solyc04g054270.2.1  | 2.384206 | 1.529452 | 6.82E-05 | 0.000651 | 241   | 418   | 286   | 33   | 50   | 22   |
| Solyc09g014400.2.1  | 2.38459  | 3.812462 | 0.000137 | 0.00118  | 323   | 2844  | 1986  | 67   | 309  | 152  |
| Solyc03g119200.2.1  | 2.384743 | 2.927392 | 3.53E-05 | 0.00037  | 268   | 1667  | 871   | 119  | 97   | 55   |
| Solyc01g103250.2.1  | 2.38512  | 1.714115 | 0.000152 | 0.001289 | 177   | 565   | 389   | 20   | 63   | 36   |
| Solyc06g062370.2.1  | 2.38553  | 3.944724 | 0.00085  | 0.005538 | 503   | 1504  | 3023  | 46   | 476  | 109  |
| Solyc03g117550.1.1  | 2.387431 | 1.661629 | 0.000409 | 0.00298  | 213   | 474   | 367   | 17   | 35   | 52   |
| Solyc06g072350.2.1  | 2.388037 | 6.425012 | 3.69E-06 | 5.13E-05 | 4373  | 9751  | 14135 | 681  | 1319 | 1044 |
| Solyc08g076300.2.1  | 2.388754 | 1.693972 | 0.000879 | 0.005693 | 142   | 590   | 403   | 10   | 71   | 38   |
| Solyc02g083190.1.1  | 2.389644 | 0.569463 | 0.000685 | 0.004611 | 100   | 209   | 173   | 20   | 19   | 12   |
| Solyc01g068470.2.1  | 2.392715 | 2.28841  | 0.000214 | 0.001722 | 609   | 594   | 319   | 94   | 50   | 27   |
| Solyc04g076100.2.1  | 2.39393  | 1.527262 | 0.000186 | 0.001528 | 199   | 270   | 432   | 30   | 45   | 27   |
| Solyc09g090870.2.1  | 2.395293 | 3.520529 | 3.09E-07 | 5.82E-06 | 677   | 2127  | 1237  | 106  | 228  | 94   |
| Solyc06g051250.1.1  | 2.395885 | 0.866666 | 0.000294 | 0.002263 | 162   | 270   | 160   | 20   | 31   | 14   |
| Solyc04g014680.2.1  | 2.396115 | 3.403785 | 1.47E-05 | 0.000171 | 573   | 1729  | 1351  | 48   | 199  | 134  |
| Solyc09g015770.2.1  | 2.396246 | 6.400087 | 9.60E-06 | 0.000118 | 5104  | 19152 | 6826  | 400  | 2003 | 825  |
| Solyc03g119690.1.1  | 2.396567 | 5.587158 | 1.11E-06 | 1.81E-05 | 5827  | 5402  | 3760  | 811  | 647  | 279  |
| Solyc12g015710.1.1  | 2.396907 | 2.647234 | 5.22E-06 | 6.97E-05 | 397   | 1031  | 717   | 52   | 108  | 65   |
| Solyc04g050960.2.1  | 2.397543 | 3.918163 | 1.98E-07 | 3.93E-06 | 815   | 2728  | 1777  | 121  | 260  | 163  |
| Solyc09g074650.2.1  | 2.398008 | 4.0392   | 4.38E-08 | 1.03E-06 | 1233  | 2479  | 1815  | 241  | 180  | 148  |
| Solyc12g056800.1.1  | 2.398551 | 4.912917 | 1.05E-08 | 2.89E-07 | 1674  | 4892  | 3844  | 314  | 539  | 254  |
| Solyc10g086470.1.1  | 2.399861 | 1.322309 | 0.000115 | 0.001022 | 188   | 383   | 259   | 33   | 36   | 19   |
| Solyc04g079050.1.1  | 2.400842 | 2.087048 | 9.93E-05 | 0.000899 | 384   | 692   | 345   | 74   | 62   | 18   |
| Solyc07g052670.2.1  | 2.402723 | 1.802621 | 0.000177 | 0.001463 | 124   | 668   | 453   | 42   | 59   | 25   |
| Solyc09g010450.1.1  | 2.403073 | 1.697007 | 7.63E-05 | 0.000717 | 176   | 478   | 436   | 36   | 46   | 31   |
| Solyc02g084590.2.1  | 2.404863 | 2.528821 | 2.22E-05 | 0.000244 | 348   | 922   | 701   | 36   | 126  | 53   |
| Solyc02g080570.2.1  | 2.40595  | 5.041107 | 9.77E-09 | 2.71E-07 | 1742  | 5889  | 3973  | 318  | 542  | 322  |
| Solyc08g015960.2.1  | 2.407419 | 3.650677 | 3.61E-07 | 6.72E-06 | 604   | 2188  | 1618  | 150  | 183  | 112  |
| Solyc12g094430.1.1  | 2.407529 | 3.790191 | 2.94E-07 | 5.59E-06 | 1306  | 1819  | 1367  | 222  | 142  | 112  |
| Solyc04g040160.2.1  | 2.408514 | 3.368691 | 0.001522 | 0.009067 | 1701  | 773   | 492   | 248  | 68   | 38   |
| Solyc01g096390.2.1  | 2.408697 | 4.64345  | 3.02E-08 | 7.39E-07 | 1251  | 4862  | 2853  | 239  | 413  | 244  |
| Solyc09g082980.2.1  | 2.408828 | 3.741029 | 5.81E-08 | 1.32E-06 | 1002  | 1767  | 1638  | 173  | 173  | 121  |

|                    |          |          |          |          |       |       |       |      |      |      |
|--------------------|----------|----------|----------|----------|-------|-------|-------|------|------|------|
| Solyc07g045460.2.1 | 2.408889 | 2.573413 | 0.000168 | 0.001399 | 195   | 1404  | 638   | 45   | 150  | 36   |
| Solyc05g044480.2.1 | 2.40891  | 3.52036  | 6.00E-05 | 0.000585 | 366   | 2089  | 1651  | 56   | 275  | 105  |
| Solyc04g011900.2.1 | 2.40909  | 3.914039 | 0.000143 | 0.001223 | 2162  | 1249  | 1044  | 324  | 106  | 83   |
| Solyc05g051240.1.1 | 2.409419 | 3.689791 | 4.39E-05 | 0.000445 | 703   | 2846  | 1182  | 49   | 365  | 97   |
| Solyc01g005730.2.1 | 2.413236 | 3.478591 | 2.52E-05 | 0.000274 | 983   | 1460  | 1191  | 37   | 256  | 122  |
| Solyc09g010540.2.1 | 2.413286 | 1.266592 | 0.000593 | 0.004073 | 177   | 356   | 262   | 10   | 36   | 35   |
| Solyc10g081470.1.1 | 2.414035 | 4.221863 | 2.72E-08 | 6.74E-07 | 1739  | 2302  | 1978  | 269  | 235  | 149  |
| Solyc06g066620.2.1 | 2.414448 | 4.793717 | 4.31E-07 | 7.86E-06 | 3382  | 2689  | 2427  | 440  | 317  | 208  |
| Solyc11g066900.1.1 | 2.414565 | 3.634966 | 1.15E-06 | 1.87E-05 | 921   | 1755  | 1463  | 73   | 195  | 163  |
| Solyc11g007530.1.1 | 2.415288 | 1.16978  | 0.000725 | 0.004843 | 215   | 269   | 224   | 36   | 13   | 23   |
| Solyc11g044360.1.1 | 2.415989 | 2.313559 | 7.26E-06 | 9.27E-05 | 364   | 764   | 543   | 54   | 81   | 42   |
| Solyc03g005820.2.1 | 2.416531 | 2.422074 | 2.50E-05 | 0.000271 | 259   | 974   | 656   | 71   | 92   | 32   |
| Solyc05g047590.2.1 | 2.419507 | 1.416322 | 0.001006 | 0.00637  | 87    | 443   | 398   | 16   | 69   | 17   |
| Solyc03g006870.2.1 | 2.422259 | 5.890545 | 6.08E-09 | 1.77E-07 | 4844  | 9515  | 5788  | 678  | 929  | 508  |
| Solyc04g051660.2.1 | 2.42289  | 3.88788  | 8.96E-06 | 0.000111 | 418   | 3163  | 1910  | 126  | 286  | 129  |
| Solyc01g020440.2.1 | 2.423903 | 3.4711   | 2.69E-06 | 3.89E-05 | 463   | 2108  | 1408  | 86   | 214  | 103  |
| Solyc03g082960.2.1 | 2.424453 | 4.537426 | 1.31E-07 | 2.73E-06 | 1969  | 3729  | 2165  | 401  | 292  | 128  |
| Solyc08g081140.2.1 | 2.424825 | 4.729843 | 1.59E-08 | 4.20E-07 | 1926  | 4650  | 2629  | 407  | 288  | 215  |
| Solyc11g009010.1.1 | 2.424836 | 0.895209 | 0.000494 | 0.003483 | 97    | 333   | 212   | 12   | 34   | 19   |
| Solyc05g054600.2.1 | 2.424948 | 2.766337 | 7.59E-06 | 9.63E-05 | 327   | 1231  | 844   | 57   | 111  | 71   |
| Solyc10g080360.1.1 | 2.426242 | 1.542161 | 0.000199 | 0.001621 | 305   | 234   | 336   | 38   | 33   | 27   |
| Solyc05g024020.1.1 | 2.427103 | 1.504422 | 0.001714 | 0.009994 | 433   | 257   | 141   | 56   | 28   | 13   |
| Solyc08g007530.2.1 | 2.428116 | 0.529421 | 0.000691 | 0.004642 | 83    | 242   | 162   | 14   | 19   | 15   |
| Solyc09g007260.2.1 | 2.429681 | 2.682002 | 6.87E-06 | 8.82E-05 | 504   | 806   | 782   | 80   | 121  | 35   |
| Solyc12g014220.1.1 | 2.430257 | 2.352203 | 1.17E-05 | 0.000139 | 389   | 615   | 650   | 68   | 66   | 42   |
| Solyc04g082110.2.1 | 2.435552 | 1.197134 | 0.001005 | 0.006366 | 123   | 354   | 298   | 7    | 50   | 25   |
| Solyc10g080600.1.1 | 2.435918 | 1.823362 | 0.00028  | 0.002168 | 301   | 464   | 383   | 15   | 44   | 56   |
| Solyc08g065260.2.1 | 2.436162 | 3.71912  | 2.42E-07 | 4.72E-06 | 1548  | 1452  | 1114  | 162  | 176  | 117  |
| Solyc11g020040.1.1 | 2.436989 | 3.551408 | 0.000293 | 0.002251 | 227   | 2949  | 1360  | 51   | 237  | 133  |
| Solyc04g071610.2.1 | 2.437726 | 6.030625 | 1.13E-06 | 1.83E-05 | 3701  | 14988 | 5575  | 1021 | 982  | 345  |
| Solyc05g025500.2.1 | 2.437899 | 3.290204 | 6.28E-07 | 1.10E-05 | 951   | 1337  | 906   | 145  | 129  | 67   |
| Solyc07g038160.2.1 | 2.43799  | 1.886143 | 0.000124 | 0.001082 | 473   | 286   | 333   | 35   | 60   | 34   |
| Solyc12g056220.1.1 | 2.440106 | 6.426783 | 3.03E-06 | 4.32E-05 | 10484 | 9739  | 6747  | 1485 | 839  | 599  |
| Solyc08g007430.1.1 | 2.440156 | 0.617963 | 0.001056 | 0.006627 | 99    | 266   | 155   | 7    | 24   | 20   |
| Solyc11g065680.1.1 | 2.440985 | 1.890218 | 0.000277 | 0.002147 | 531   | 313   | 247   | 33   | 43   | 46   |
| Solyc04g079080.2.1 | 2.442889 | 0.129336 | 0.001025 | 0.006477 | 85    | 158   | 109   | 13   | 14   | 9    |
| Solyc02g087060.2.1 | 2.445071 | 2.71267  | 0.000497 | 0.003502 | 177   | 1096  | 1045  | 24   | 108  | 91   |
| Solyc07g005930.2.1 | 2.44537  | 4.757668 | 2.13E-08 | 5.45E-07 | 2091  | 4174  | 2904  | 202  | 611  | 199  |
| Solyc03g113460.1.1 | 2.445428 | 2.724774 | 7.38E-05 | 0.000698 | 874   | 507   | 575   | 85   | 53   | 75   |
| Solyc06g053830.2.1 | 2.445434 | 2.951743 | 1.36E-06 | 2.16E-05 | 564   | 1625  | 565   | 90   | 124  | 59   |
| Solyc12g088650.1.1 | 2.445681 | 2.360028 | 0.000136 | 0.001179 | 242   | 836   | 701   | 24   | 74   | 73   |
| Solyc10g078160.1.1 | 2.445916 | 2.726091 | 1.33E-06 | 2.11E-05 | 538   | 917   | 732   | 68   | 112  | 54   |
| Solyc08g079100.2.1 | 2.447047 | 3.276448 | 6.09E-05 | 0.000592 | 1201  | 1287  | 604   | 157  | 172  | 28   |
| Solyc06g072710.2.1 | 2.448109 | 2.013027 | 0.000153 | 0.001291 | 331   | 596   | 414   | 77   | 48   | 15   |
| Solyc04g011580.2.1 | 2.449602 | 4.308143 | 4.40E-09 | 1.31E-07 | 1734  | 2564  | 2187  | 182  | 350  | 173  |
| Solyc09g065160.2.1 | 2.45     | 4.699157 | 4.88E-07 | 8.78E-06 | 2849  | 3514  | 2063  | 458  | 310  | 135  |
| Solyc07g043330.1.1 | 2.454108 | 3.176035 | 2.00E-06 | 3.02E-05 | 476   | 1433  | 1212  | 81   | 116  | 105  |
| Solyc01g028870.2.1 | 2.455332 | 3.79842  | 7.18E-08 | 1.59E-06 | 730   | 2449  | 1725  | 138  | 233  | 119  |
| Solyc02g070210.2.1 | 2.457185 | 1.944189 | 0.000503 | 0.003538 | 225   | 255   | 707   | 62   | 36   | 29   |
| Solyc08g007770.2.1 | 2.457481 | 2.778053 | 2.23E-06 | 3.32E-05 | 546   | 1191  | 622   | 93   | 73   | 62   |
| Solyc07g043490.1.1 | 2.460414 | 3.355023 | 0.000138 | 0.001189 | 192   | 2915  | 982   | 137  | 129  | 82   |
| Solyc04g053120.2.1 | 2.460664 | 4.126689 | 1.71E-08 | 4.47E-07 | 1272  | 2609  | 2029  | 255  | 220  | 124  |
| Solyc05g006170.2.1 | 2.462696 | 4.788203 | 2.43E-06 | 3.56E-05 | 980   | 5341  | 3726  | 159  | 550  | 278  |
| Solyc04g071800.2.1 | 2.464313 | 5.681609 | 4.55E-07 | 8.23E-06 | 5633  | 6786  | 4209  | 883  | 571  | 299  |
| Solyc05g005880.2.1 | 2.464744 | 5.425109 | 8.23E-06 | 0.000103 | 4860  | 4491  | 4100  | 878  | 367  | 201  |
| Solyc04g071930.2.1 | 2.465332 | 3.542061 | 0.001531 | 0.009107 | 2051  | 620   | 574   | 265  | 83   | 41   |
| Solyc06g082980.2.1 | 2.467571 | 5.807057 | 6.66E-06 | 8.60E-05 | 4688  | 9557  | 5032  | 1152 | 467  | 260  |
| Solyc04g074080.2.1 | 2.469721 | 3.205264 | 0.000274 | 0.002128 | 1125  | 903   | 808   | 210  | 62   | 30   |
| Solyc11g071550.1.1 | 2.471687 | 2.475215 | 7.79E-05 | 0.00073  | 600   | 392   | 677   | 53   | 125  | 28   |
| Solyc08g008380.2.1 | 2.47229  | 2.996302 | 0.000133 | 0.00115  | 1095  | 766   | 557   | 158  | 79   | 33   |
| Solyc04g009260.1.1 | 2.472405 | 1.612866 | 9.68E-05 | 0.000879 | 195   | 351   | 446   | 24   | 60   | 24   |
| Solyc11g069430.1.1 | 2.47246  | 6.602524 | 2.63E-07 | 5.08E-06 | 8613  | 14723 | 9357  | 588  | 1548 | 1168 |
| Solyc01g097510.2.1 | 2.473271 | 2.972193 | 7.36E-05 | 0.000697 | 252   | 1467  | 1114  | 46   | 193  | 54   |
| Solyc07g062300.2.1 | 2.475687 | 2.541371 | 3.78E-06 | 5.25E-05 | 401   | 890   | 684   | 45   | 105  | 53   |
| Solyc07g042500.2.1 | 2.475721 | 5.153933 | 6.16E-08 | 1.39E-06 | 1700  | 7710  | 3752  | 288  | 696  | 291  |
| Solyc02g077160.2.1 | 2.480338 | 2.505163 | 3.66E-06 | 5.09E-05 | 451   | 841   | 610   | 44   | 86   | 61   |
| Solyc01g010480.2.1 | 2.482446 | 7.244433 | 1.06E-06 | 1.74E-05 | 7608  | 24757 | 20753 | 1012 | 3013 | 1377 |
| Solyc08g065820.1.1 | 2.484826 | 0.366496 | 0.001513 | 0.009016 | 53    | 180   | 195   | 9    | 25   | 10   |
| Solyc11g007830.1.1 | 2.487779 | 4.965943 | 2.02E-10 | 7.98E-09 | 2394  | 5021  | 3298  | 327  | 453  | 281  |
| Solyc04g056580.2.1 | 2.489659 | 4.070941 | 5.23E-08 | 1.20E-06 | 1606  | 2046  | 1790  | 247  | 236  | 96   |
| Solyc03g093880.2.1 | 2.490128 | 3.071964 | 7.36E-07 | 1.26E-05 | 597   | 1622  | 761   | 75   | 105  | 95   |
| Solyc07g063770.2.1 | 2.490953 | 2.937492 | 1.70E-05 | 0.000194 | 378   | 1931  | 609   | 44   | 150  | 74   |
| Solyc08g006270.1.1 | 2.493642 | 0.721476 | 0.000256 | 0.00201  | 127   | 261   | 161   | 20   | 19   | 14   |
| Solyc05g009780.2.1 | 2.494331 | 4.140865 | 3.29E-08 | 7.98E-07 | 1096  | 2758  | 2224  | 238  | 275  | 101  |
| Solyc09g089690.2.1 | 2.495937 | 4.119184 | 2.62E-06 | 3.81E-05 | 2035  | 1824  | 1576  | 318  | 151  | 101  |
| Solyc03g119640.2.1 | 2.496064 | 3.044359 | 3.94E-07 | 7.26E-06 | 793   | 1274  | 695   | 82   | 139  | 64   |
| Solyc02g086730.1.1 | 2.496065 | 5.822815 | 3.25E-06 | 4.59E-05 | 6507  | 5882  | 5355  | 1039 | 506  | 321  |
| Solyc01g095170.2.1 | 2.497992 | 1.894005 | 0.000717 | 0.004802 | 66    | 911   | 449   | 27   | 71   | 31   |
| Solyc02g082120.2.1 | 2.498024 | 5.390696 | 2.19E-09 | 6.91E-08 | 3673  | 7022  | 3699  | 406  | 819  | 275  |
| Solyc03g113010.1.1 | 2.498161 | 3.58168  | 2.46E-08 | 6.19E-07 | 1196  | 1640  | 1093  | 124  | 175  | 105  |
| Solyc08g075120.2.1 | 2.498527 | 2.363663 | 9.24E-05 | 0.000845 | 311   | 685   | 724   | 42   | 36   | 77   |
| Solyc09g098290.2.1 | 2.499034 | 3.609398 | 6.29E-07 | 1.10E-05 | 950   | 1604  | 1491  | 202  | 112  | 84   |
| Solyc12g013810.1.1 | 2.49917  | 5.884719 | 3.69E-07 | 6.86E-06 | 7552  | 5891  | 4813  | 805  | 689  | 467  |
| Solyc01g098340.2.1 | 2.499585 | 3.603978 | 1.68E-08 | 4.39E-07 | 899   | 2127  | 1207  | 116  | 172  | 118  |

|                     |          |          |          |          |       |       |        |      |       |      |
|---------------------|----------|----------|----------|----------|-------|-------|--------|------|-------|------|
| Solyc12g008400.1.1  | 2.499732 | 2.358088 | 8.58E-06 | 0.000107 | 415   | 807   | 512    | 41   | 60    | 63   |
| Solyc08g077050.2.1  | 2.500558 | 3.897082 | 8.85E-08 | 1.92E-06 | 1241  | 2098  | 1634   | 229  | 140   | 115  |
| Solyc12g0566510.1.1 | 2.504309 | 3.545761 | 2.01E-07 | 4.00E-06 | 1066  | 1714  | 1119   | 174  | 111   | 93   |
| Solyc11g066670.1.1  | 2.505692 | 3.542668 | 1.44E-06 | 2.28E-05 | 491   | 2300  | 1450   | 149  | 112   | 112  |
| Solyc07g043600.2.1  | 2.506969 | 4.057195 | 7.97E-08 | 1.74E-06 | 1042  | 2686  | 2042   | 108  | 349   | 135  |
| Solyc10g055760.1.1  | 2.507188 | 3.386897 | 0.000314 | 0.00239  | 609   | 2758  | 651    | 20   | 244   | 109  |
| Solyc12g0066320.1.1 | 2.507255 | 6.843677 | 1.03E-07 | 2.21E-06 | 7395  | 22128 | 11633  | 1665 | 1428  | 762  |
| Solyc05g018510.2.1  | 2.512191 | 4.73805  | 5.48E-05 | 0.00054  | 3681  | 2687  | 1826   | 554  | 257   | 81   |
| Solyc04g009740.2.1  | 2.513929 | 4.858205 | 2.30E-08 | 5.82E-07 | 3458  | 3454  | 2320   | 396  | 380   | 197  |
| Solyc02g090890.2.1  | 2.514355 | 5.744902 | 1.66E-05 | 0.00019  | 7238  | 6121  | 3426   | 241  | 1390  | 367  |
| Solyc05g053570.2.1  | 2.515295 | 1.317792 | 7.98E-05 | 0.000746 | 139   | 464   | 274    | 23   | 37    | 22   |
| Solyc12g088430.1.1  | 2.515587 | 0.269992 | 0.00076  | 0.005041 | 109   | 127   | 136    | 12   | 15    | 11   |
| Solyc06g008050.2.1  | 2.518308 | 0.56061  | 0.001256 | 0.007691 | 146   | 237   | 101    | 8    | 14    | 22   |
| Solyc08g067240.2.1  | 2.519187 | 2.037812 | 8.99E-06 | 0.000111 | 316   | 669   | 416    | 32   | 69    | 37   |
| Solyc03g117860.2.1  | 2.51934  | 6.153512 | 0.000948 | 0.006062 | 13638 | 4064  | 2152   | 1306 | 855   | 253  |
| Solyc07g006630.2.1  | 2.519871 | 3.351031 | 1.40E-06 | 2.22E-05 | 1219  | 1045  | 915    | 116  | 187   | 55   |
| Solyc10g018530.1.1  | 2.520361 | 1.246117 | 0.000171 | 0.001428 | 213   | 394   | 192    | 26   | 47    | 10   |
| Solyc04g071280.1.1  | 2.522938 | 2.304902 | 3.90E-06 | 5.39E-05 | 332   | 875   | 519    | 54   | 66    | 42   |
| Solyc04g028470.1.1  | 2.522988 | 0.677859 | 0.000325 | 0.002467 | 160   | 233   | 125    | 13   | 22    | 16   |
| Solyc10g009570.2.1  | 2.524353 | 3.871572 | 0.001484 | 0.008863 | 2928  | 569   | 451    | 247  | 94    | 115  |
| Solyc03g117540.2.1  | 2.52818  | 3.793467 | 2.70E-08 | 6.71E-07 | 1195  | 1980  | 1466   | 189  | 203   | 78   |
| Solyc12g007140.1.1  | 2.528329 | 3.639185 | 6.22E-07 | 1.09E-05 | 714   | 2156  | 1520   | 68   | 197   | 145  |
| Solyc08g082570.2.1  | 2.529046 | 2.972616 | 4.30E-06 | 5.87E-05 | 690   | 1187  | 764    | 136  | 77    | 42   |
| Solyc07g053020.1.1  | 2.530549 | 4.151669 | 9.14E-06 | 0.000113 | 1028  | 3227  | 2069   | 50   | 348   | 206  |
| Solyc09g011770.2.1  | 2.532796 | 1.608574 | 0.000161 | 0.001351 | 109   | 491   | 465    | 24   | 50    | 27   |
| Solyc06g071790.2.1  | 2.535591 | 6.526883 | 3.73E-05 | 0.000388 | 9665  | 11024 | 9089   | 1980 | 577   | 378  |
| Solyc12g014250.1.1  | 2.536571 | 6.553936 | 3.30E-06 | 4.65E-05 | 3590  | 18244 | 12558  | 518  | 1818  | 893  |
| Solyc05g012100.2.1  | 2.540263 | 4.589149 | 2.79E-07 | 5.34E-06 | 1045  | 5017  | 2834   | 157  | 502   | 185  |
| Solyc02g070000.2.1  | 2.540417 | 2.75977  | 0.000303 | 0.002317 | 284   | 1220  | 920    | 14   | 149   | 71   |
| Solyc02g079870.2.1  | 2.542599 | 3.082745 | 5.84E-07 | 1.03E-05 | 632   | 1082  | 1097   | 72   | 161   | 59   |
| Solyc03g113680.2.1  | 2.543442 | 2.520696 | 0.000132 | 0.001146 | 846   | 400   | 433    | 91   | 48    | 41   |
| Solyc02g064640.2.1  | 2.544314 | 3.357199 | 9.56E-07 | 1.58E-05 | 605   | 1546  | 1377   | 103  | 209   | 50   |
| Solyc02g077260.2.1  | 2.545769 | 1.204152 | 7.28E-05 | 0.000691 | 166   | 452   | 193    | 25   | 31    | 18   |
| Solyc03g093550.1.1  | 2.548116 | 3.523241 | 3.47E-05 | 0.000365 | 308   | 3345  | 979    | 70   | 206   | 110  |
| Solyc03g006690.1.1  | 2.55059  | 3.141376 | 0.000152 | 0.00129  | 632   | 1714  | 802    | 197  | 48    | 31   |
| Solyc08g079110.2.1  | 2.551333 | 2.724754 | 8.41E-05 | 0.00078  | 626   | 743   | 753    | 115  | 27    | 55   |
| Solyc09g007550.2.1  | 2.552353 | 2.273122 | 1.29E-05 | 0.000152 | 436   | 595   | 541    | 28   | 77    | 52   |
| Solyc10g044840.1.1  | 2.553487 | 1.844977 | 0.000229 | 0.001828 | 543   | 303   | 217    | 52   | 38    | 24   |
| Solyc06g059870.1.1  | 2.555003 | 6.399983 | 5.80E-08 | 1.32E-06 | 8996  | 11591 | 7241   | 1142 | 832   | 693  |
| Solyc01g098560.2.1  | 2.555123 | 4.916205 | 2.45E-08 | 6.18E-07 | 2957  | 4716  | 2537   | 482  | 316   | 176  |
| Solyc10g085330.1.1  | 2.555155 | 1.622773 | 5.06E-05 | 0.000504 | 304   | 449   | 263    | 19   | 63    | 23   |
| Solyc03g112210.1.1  | 2.556011 | 3.288034 | 1.39E-07 | 2.87E-06 | 937   | 1300  | 979    | 126  | 135   | 61   |
| Solyc03g111700.2.1  | 2.558638 | 4.109578 | 3.46E-08 | 8.30E-07 | 1887  | 2505  | 1324   | 249  | 189   | 116  |
| Solyc07g018360.2.1  | 2.559189 | 6.997127 | 8.75E-09 | 2.45E-07 | 8667  | 20194 | 15411  | 1295 | 1853  | 1049 |
| Solyc02g082680.2.1  | 2.56027  | 4.27128  | 1.23E-09 | 4.08E-08 | 1876  | 2487  | 1976   | 169  | 302   | 166  |
| Solyc05g050220.2.1  | 2.561104 | 0.645042 | 0.001085 | 0.006788 | 57    | 428   | 117    | 19   | 22    | 9    |
| Solyc11g010960.1.1  | 2.56139  | 2.842398 | 9.29E-05 | 0.000847 | 897   | 825   | 540    | 137  | 76    | 21   |
| Solyc12g019110.1.1  | 2.562051 | 2.983259 | 1.43E-06 | 2.27E-05 | 482   | 1342  | 948    | 47   | 124   | 85   |
| Solyc01g096660.2.1  | 2.562364 | 5.284282 | 1.39E-08 | 3.75E-07 | 4790  | 4479  | 3105   | 501  | 489   | 275  |
| Solyc01g087500.2.1  | 2.563666 | 1.90416  | 0.000523 | 0.003659 | 161   | 291   | 743    | 36   | 27    | 47   |
| Solyc12g011010.1.1  | 2.566115 | 1.403268 | 4.13E-05 | 0.000423 | 265   | 330   | 255    | 22   | 40    | 23   |
| Solyc02g093720.2.1  | 2.566504 | 2.236054 | 0.000433 | 0.003131 | 702   | 308   | 360    | 82   | 29    | 32   |
| Solyc08g080000.2.1  | 2.566611 | 2.258739 | 9.94E-05 | 0.000899 | 263   | 884   | 559    | 29   | 127   | 19   |
| Solyc08g075950.1.1  | 2.567217 | 0.925196 | 0.00035  | 0.002618 | 89    | 276   | 278    | 19   | 18    | 20   |
| Solyc01g091450.2.1  | 2.568465 | 2.149529 | 2.08E-05 | 0.000231 | 317   | 713   | 494    | 21   | 83    | 43   |
| Solyc08g007380.2.1  | 2.569192 | 1.409631 | 7.61E-05 | 0.000715 | 156   | 417   | 338    | 29   | 47    | 13   |
| Solyc11g012690.1.1  | 2.56995  | 1.553669 | 0.000263 | 0.002052 | 239   | 384   | 341    | 10   | 37    | 42   |
| Solyc06g060880.2.1  | 2.570073 | 1.087817 | 0.000119 | 0.001051 | 207   | 320   | 174    | 26   | 21    | 18   |
| Solyc07g056310.2.1  | 2.570655 | 0.550784 | 0.000808 | 0.005309 | 119   | 189   | 165    | 5    | 27    | 15   |
| Solyc07g005830.2.1  | 2.571132 | 4.654517 | 1.80E-09 | 5.78E-08 | 2117  | 3462  | 2859   | 345  | 271   | 183  |
| Solyc07g062870.2.1  | 2.571519 | 5.075323 | 2.13E-09 | 6.74E-08 | 2480  | 4797  | 4168   | 469  | 336   | 255  |
| Solyc01g010130.2.1  | 2.574026 | 2.405038 | 1.42E-06 | 2.25E-05 | 400   | 807   | 595    | 51   | 77    | 43   |
| Solyc09g010140.1.1  | 2.57567  | 0.430592 | 0.001048 | 0.006588 | 157   | 162   | 100    | 22   | 12    | 7    |
| Solyc09g089540.2.1  | 2.576058 | 10.02423 | 0.000318 | 0.002416 | 16420 | 94003 | 238461 | 9709 | 15363 | 8845 |
| Solyc07g066610.2.1  | 2.577903 | 7.544322 | 5.96E-06 | 7.83E-05 | 27020 | 16218 | 13298  | 2797 | 1867  | 1232 |
| Solyc10g083300.1.1  | 2.578538 | 2.804889 | 0.000162 | 0.00136  | 845   | 868   | 524    | 146  | 51    | 22   |
| Solyc04g081320.2.1  | 2.578783 | 4.061623 | 0.00158  | 0.009337 | 3337  | 620   | 567    | 330  | 115   | 74   |
| Solyc06g076470.2.1  | 2.578834 | 4.136422 | 2.21E-07 | 4.36E-06 | 2299  | 1549  | 1533   | 229  | 215   | 120  |
| Solyc12g010870.1.1  | 2.580874 | 4.373295 | 4.14E-09 | 1.24E-07 | 1993  | 2438  | 2308   | 262  | 295   | 123  |
| Solyc11g065530.1.1  | 2.582828 | 2.972989 | 0.000148 | 0.001262 | 201   | 1577  | 1135   | 51   | 200   | 33   |
| Solyc09g064870.2.1  | 2.583374 | 0.69328  | 0.000779 | 0.005149 | 201   | 154   | 134    | 23   | 23    | 6    |
| Solyc09g007570.1.1  | 2.584415 | 0.031625 | 0.001535 | 0.009127 | 114   | 103   | 92     | 14   | 14    | 4    |
| Solyc03g118240.2.1  | 2.584523 | 4.519528 | 3.12E-10 | 1.20E-08 | 1693  | 3267  | 2830   | 250  | 299   | 184  |
| Solyc01g091800.2.1  | 2.584877 | 2.552741 | 9.86E-06 | 0.000121 | 257   | 937   | 866    | 44   | 109   | 43   |
| Solyc12g010910.1.1  | 2.585197 | 2.718593 | 9.28E-05 | 0.000847 | 549   | 692   | 880    | 127  | 66    | 18   |
| Solyc11g056650.1.1  | 2.586089 | 2.792973 | 6.33E-06 | 8.24E-05 | 475   | 1663  | 458    | 41   | 107   | 73   |
| Solyc05g052160.2.1  | 2.589817 | 3.243664 | 1.19E-06 | 1.93E-05 | 657   | 1657  | 1017   | 44   | 171   | 95   |
| Solyc04g072780.2.1  | 2.593462 | 5.064893 | 8.65E-07 | 1.45E-05 | 1233  | 6652  | 4480   | 170  | 510   | 381  |
| Solyc10g086640.1.1  | 2.596675 | 0.683241 | 0.000311 | 0.002372 | 105   | 183   | 230    | 16   | 17    | 15   |
| Solyc06g069170.2.1  | 2.596711 | 5.705314 | 1.22E-09 | 4.04E-08 | 4201  | 7416  | 6055   | 655  | 676   | 343  |
| Solyc08g065950.1.1  | 2.599956 | 3.641822 | 1.13E-07 | 2.38E-06 | 1176  | 1883  | 1155   | 145  | 94    | 130  |
| Solyc05g051450.1.1  | 2.600481 | 1.14369  | 0.000334 | 0.00252  | 254   | 346   | 128    | 12   | 50    | 13   |
| Solyc01g102300.2.1  | 2.60057  | 4.275801 | 0.000153 | 0.001297 | 332   | 5119  | 2254   | 71   | 419   | 168  |
| Solyc01g006940.2.1  | 2.6006   | 4.371691 | 6.12E-10 | 2.18E-08 | 1707  | 2812  | 2429   | 248  | 283   | 135  |



|                    |          |          |          |          |        |        |        |       |       |       |
|--------------------|----------|----------|----------|----------|--------|--------|--------|-------|-------|-------|
| Solyc01g079570.2.1 | 2.600958 | 0.543187 | 0.000623 | 0.004253 | 137    | 142    | 172    | 7     | 23    | 15    |
| Solyc06g054250.2.1 | 2.6013   | 4.370102 | 3.62E-10 | 1.35E-08 | 1805   | 2937   | 2220   | 187   | 253   | 202   |
| Solyc01g057200.2.1 | 2.602046 | 2.112735 | 4.64E-06 | 6.29E-05 | 305    | 778    | 437    | 32    | 63    | 41    |
| Solyc12g010050.1.1 | 2.60335  | 1.480269 | 0.000172 | 0.001431 | 186    | 366    | 377    | 10    | 55    | 26    |
| Solyc03g114250.2.1 | 2.603854 | 2.731265 | 7.78E-07 | 1.32E-05 | 602    | 980    | 652    | 88    | 84    | 39    |
| Solyc10g081730.1.1 | 2.604374 | 0.219256 | 0.000791 | 0.005218 | 77     | 186    | 127    | 11    | 9     | 13    |
| Solyc03g123490.1.1 | 2.605322 | 3.519574 | 9.19E-07 | 1.53E-05 | 593    | 2182   | 1378   | 57    | 171   | 131   |
| Solyc09g074880.2.1 | 2.607129 | 1.938969 | 6.30E-05 | 0.00061  | 322    | 431    | 487    | 37    | 24    | 48    |
| Solyc03g096850.2.1 | 2.609561 | 4.288467 | 0.000344 | 0.002583 | 2723   | 1635   | 1569   | 447   | 106   | 45    |
| Solyc01g005720.2.1 | 2.610063 | 3.088007 | 1.88E-06 | 2.87E-05 | 620    | 1278   | 1013   | 38    | 160   | 80    |
| Solyc03g093340.2.1 | 2.610685 | 2.762159 | 1.30E-05 | 0.000153 | 917    | 660    | 511    | 50    | 71    | 81    |
| Solyc03g078640.1.1 | 2.611621 | 3.384812 | 1.41E-05 | 0.000165 | 410    | 1913   | 1465   | 39    | 208   | 98    |
| Solyc08g065430.2.1 | 2.611965 | 2.1472   | 0.00017  | 0.001414 | 255    | 818    | 508    | 17    | 122   | 20    |
| Solyc08g065940.2.1 | 2.61445  | 5.69124  | 4.55E-09 | 1.35E-07 | 5355   | 7426   | 4490   | 693   | 565   | 351   |
| Solyc01g056780.2.1 | 2.615671 | 3.773344 | 3.58E-08 | 8.57E-07 | 1391   | 1623   | 1428   | 190   | 155   | 83    |
| Solyc06g074820.2.1 | 2.61716  | 4.748536 | 2.07E-07 | 4.10E-06 | 1185   | 3612   | 4476   | 212   | 524   | 168   |
| Solyc11g013390.1.1 | 2.617732 | 0.473018 | 0.000311 | 0.002368 | 103    | 192    | 161    | 18    | 16    | 8     |
| Solyc04g054990.2.1 | 2.6182   | 5.199842 | 2.56E-08 | 6.39E-07 | 1832   | 4768   | 5972   | 296   | 591   | 298   |
| Solyc05g006770.2.1 | 2.619211 | 0.371466 | 0.001032 | 0.006505 | 69     | 208    | 163    | 6     | 14    | 17    |
| Solyc03g096460.2.1 | 2.619353 | 3.500997 | 0.001427 | 0.008589 | 2070   | 396    | 648    | 235   | 59    | 45    |
| Solyc07g006000.2.1 | 2.621336 | 4.442572 | 1.40E-06 | 2.22E-05 | 2751   | 2091   | 1927   | 353   | 143   | 150   |
| Solyc01g111260.2.1 | 2.62325  | 4.720608 | 2.55E-08 | 6.37E-07 | 1091   | 5747   | 3078   | 287   | 392   | 169   |
| Solyc09g065760.2.1 | 2.627472 | 3.114384 | 1.10E-06 | 1.80E-05 | 381    | 2017   | 889    | 85    | 101   | 78    |
| Solyc01g108070.2.1 | 2.62781  | 2.899381 | 5.44E-07 | 9.68E-06 | 775    | 897    | 748    | 97    | 91    | 45    |
| Solyc01g100760.2.1 | 2.634584 | 3.482541 | 1.55E-06 | 2.41E-05 | 495    | 1921   | 1587   | 167   | 130   | 53    |
| Solyc05g051640.2.1 | 2.63558  | 1.185004 | 0.000112 | 0.000999 | 116    | 294    | 353    | 18    | 36    | 17    |
| Solyc12g014610.1.1 | 2.637753 | 4.390088 | 3.52E-10 | 1.32E-08 | 2178   | 3012   | 1823   | 204   | 321   | 144   |
| Solyc10g006370.2.1 | 2.639872 | 4.110534 | 2.24E-09 | 7.02E-08 | 1404   | 2361   | 2059   | 216   | 167   | 136   |
| Solyc04g071150.2.1 | 2.639969 | 2.121043 | 0.000137 | 0.00118  | 460    | 382    | 511    | 78    | 25    | 24    |
| Solyc10g084970.1.1 | 2.640139 | 2.698688 | 3.14E-07 | 5.92E-06 | 590    | 1011   | 608    | 72    | 76    | 50    |
| Solyc05g026240.1.1 | 2.645098 | 2.260072 | 1.65E-05 | 0.000189 | 304    | 696    | 640    | 71    | 60    | 19    |
| Solyc09g089730.2.1 | 2.648148 | 4.183493 | 4.78E-09 | 1.41E-07 | 1118   | 3661   | 1866   | 117   | 285   | 167   |
| Solyc06g008220.2.1 | 2.648441 | 4.150302 | 2.06E-08 | 5.29E-07 | 946    | 3018   | 2362   | 110   | 300   | 154   |
| Solyc01g106590.2.1 | 2.649827 | 1.788409 | 6.22E-06 | 8.12E-05 | 249    | 559    | 384    | 36    | 46    | 24    |
| Solyc09g008640.1.1 | 2.652173 | 1.713589 | 6.76E-05 | 0.000646 | 216    | 539    | 384    | 54    | 34    | 12    |
| Solyc01g058160.2.1 | 2.652929 | 0.020968 | 0.000738 | 0.004914 | 88     | 164    | 84     | 11    | 16    | 4     |
| Solyc09g010160.1.1 | 2.654288 | 2.914338 | 0.000453 | 0.003253 | 130    | 1524   | 1176   | 22    | 165   | 62    |
| Solyc12g008410.1.1 | 2.654985 | 3.507302 | 5.19E-07 | 9.30E-06 | 603    | 2077   | 1420   | 54    | 193   | 110   |
| Solyc10g084320.1.1 | 2.655921 | 7.690971 | 2.32E-05 | 0.000254 | 11288  | 16442  | 39252  | 3420  | 1485  | 1206  |
| Solyc09g074260.1.1 | 2.663476 | 2.768185 | 0.000292 | 0.002248 | 988    | 672    | 436    | 116   | 90    | 48    |
| Solyc03g063560.2.1 | 2.663875 | 8.027335 | 5.65E-05 | 0.000555 | 38998  | 23115  | 17446  | 4915  | 1916  | 984   |
| Solyc02g089690.2.1 | 2.665265 | 1.212996 | 0.000138 | 0.001191 | 116    | 358    | 328    | 24    | 41    | 9     |
| Solyc11g067130.1.1 | 2.666574 | 0.528324 | 0.000234 | 0.001866 | 129    | 203    | 141    | 9     | 27    | 9     |
| Solyc11g006680.1.1 | 2.667208 | 3.818001 | 2.04E-09 | 6.48E-08 | 952    | 2278   | 1708   | 155   | 197   | 87    |
| Solyc12g055720.1.1 | 2.669074 | 4.412516 | 2.49E-07 | 4.85E-06 | 1749   | 3467   | 2184   | 371   | 150   | 106   |
| Solyc03g111260.2.1 | 2.672512 | 4.521313 | 1.29E-10 | 5.29E-09 | 1594   | 3837   | 2658   | 176   | 327   | 200   |
| Solyc05g050550.2.1 | 2.673064 | 1.508719 | 0.000803 | 0.005284 | 381    | 283    | 212    | 57    | 28    | 8     |
| Solyc07g045140.2.1 | 2.675196 | 1.983843 | 0.000202 | 0.00164  | 379    | 694    | 295    | 59    | 62    | 6     |
| Solyc09g056170.2.1 | 2.677286 | 1.15306  | 0.000195 | 0.001597 | 198    | 247    | 270    | 23    | 43    | 6     |
| Solyc12g013980.1.1 | 2.678385 | 0.034521 | 0.000481 | 0.003417 | 75     | 180    | 93     | 10    | 14    | 6     |
| Solyc04g063240.2.1 | 2.681129 | 3.334211 | 0.000225 | 0.001798 | 1606   | 870    | 559    | 198   | 72    | 29    |
| Solyc07g006910.2.1 | 2.681603 | 1.278018 | 0.000493 | 0.003479 | 75     | 421    | 372    | 34    | 34    | 7     |
| Solyc03g013160.2.1 | 2.683617 | 2.118851 | 0.000729 | 0.004867 | 121    | 513    | 850    | 10    | 79    | 45    |
| Solyc03g034170.2.1 | 2.684061 | 3.87884  | 0.00036  | 0.002675 | 2497   | 970    | 822    | 295   | 61    | 63    |
| Solyc02g070040.1.1 | 2.686847 | 2.420128 | 0.000392 | 0.002876 | 150    | 1617   | 422    | 19    | 131   | 30    |
| Solyc01g057830.2.1 | 2.68686  | 6.038172 | 1.35E-06 | 2.15E-05 | 6321   | 8431   | 7107   | 1175  | 464   | 288   |
| Solyc08g016720.1.1 | 2.688952 | 3.483874 | 0.000786 | 0.005187 | 84     | 2346   | 1846   | 52    | 246   | 71    |
| Solyc06g050170.2.1 | 2.689993 | 4.140109 | 7.04E-09 | 2.02E-07 | 2198   | 1954   | 1472   | 146   | 268   | 130   |
| Solyc06g073940.2.1 | 2.690306 | 2.292162 | 1.88E-05 | 0.000212 | 175    | 1209   | 511    | 36    | 79    | 36    |
| Solyc01g111990.2.1 | 2.690692 | 4.782176 | 2.03E-11 | 9.98E-10 | 2331   | 4175   | 2951   | 260   | 415   | 179   |
| Solyc07g056330.2.1 | 2.691406 | 1.397531 | 0.00033  | 0.002498 | 65     | 566    | 357    | 17    | 50    | 16    |
| Solyc10g039270.1.1 | 2.692977 | 2.12658  | 3.90E-06 | 5.39E-05 | 286    | 654    | 564    | 54    | 45    | 29    |
| Solyc03g119590.1.1 | 2.693184 | 2.410875 | 0.000143 | 0.001227 | 236    | 1292   | 512    | 16    | 54    | 77    |
| Solyc06g083220.2.1 | 2.69375  | 2.709007 | 4.41E-07 | 8.00E-06 | 359    | 1215   | 788    | 56    | 85    | 54    |
| Solyc05g009570.2.1 | 2.694388 | 2.536643 | 1.71E-06 | 2.64E-05 | 570    | 678    | 642    | 77    | 54    | 38    |
| Solyc04g071420.2.1 | 2.695717 | 3.447078 | 3.41E-08 | 8.20E-07 | 701    | 1843   | 1317   | 67    | 161   | 101   |
| Solyc08g076970.2.1 | 2.696597 | 11.22356 | 4.01E-07 | 7.38E-06 | 107693 | 400204 | 352019 | 31085 | 26036 | 14413 |
| Solyc03g083770.1.1 | 2.701589 | 4.947916 | 2.55E-06 | 3.71E-05 | 3756   | 3456   | 2690   | 360   | 594   | 66    |
| Solyc03g114640.2.1 | 2.701611 | 2.822761 | 8.19E-06 | 0.000103 | 792    | 1039   | 533    | 109   | 85    | 22    |
| Solyc11g013270.1.1 | 2.702407 | 0.299688 | 0.000872 | 0.005659 | 100    | 165    | 136    | 7     | 8     | 17    |
| Solyc04g071470.2.1 | 2.702461 | 2.567855 | 1.90E-05 | 0.000214 | 598    | 867    | 527    | 100   | 31    | 35    |
| Solyc08g078300.2.1 | 2.703886 | 2.080868 | 0.000106 | 0.000953 | 114    | 878    | 593    | 21    | 79    | 32    |
| Solyc07g062260.2.1 | 2.70499  | 2.032456 | 0.000396 | 0.002903 | 123    | 664    | 675    | 10    | 62    | 48    |
| Solyc05g007780.2.1 | 2.706342 | 2.724882 | 0.00083  | 0.005424 | 1234   | 390    | 257    | 120   | 41    | 28    |
| Solyc01g107670.2.1 | 2.707234 | 4.69368  | 0.000463 | 0.003312 | 403    | 5553   | 3967   | 42    | 502   | 263   |
| Solyc04g007410.2.1 | 2.710627 | 3.034551 | 6.44E-08 | 1.45E-06 | 811    | 1009   | 877    | 83    | 109   | 54    |
| Solyc09g065840.2.1 | 2.710653 | 3.819274 | 5.38E-08 | 1.23E-06 | 1829   | 1434   | 1181   | 164   | 174   | 85    |
| Solyc02g090020.2.1 | 2.71228  | 2.897872 | 7.13E-05 | 0.000679 | 1079   | 707    | 508    | 123   | 33    | 49    |
| Solyc01g111110.2.1 | 2.715101 | 0.667523 | 0.000725 | 0.004843 | 62     | 271    | 226    | 6     | 19    | 19    |
| Solyc01g088600.2.1 | 2.717326 | 2.126546 | 2.75E-06 | 3.96E-05 | 251    | 735    | 559    | 40    | 65    | 27    |
| Solyc10g085390.1.1 | 2.717884 | 2.359457 | 1.07E-05 | 0.000129 | 330    | 863    | 616    | 21    | 64    | 61    |
| Solyc11g066410.1.1 | 2.717983 | 4.771427 | 7.11E-08 | 1.58E-06 | 2345   | 3383   | 3395   | 443   | 214   | 132   |
| Solyc08g081160.2.1 | 2.719837 | 3.063642 | 7.86E-06 | 9.91E-05 | 222    | 1598   | 1284   | 63    | 128   | 62    |
| Solyc07g052390.2.1 | 2.720243 | 4.121365 | 8.71E-10 | 3.00E-08 | 1193   | 2581   | 2261   | 117   | 238   | 159   |

|                    |          |          |          |          |        |        |        |       |       |      |
|--------------------|----------|----------|----------|----------|--------|--------|--------|-------|-------|------|
| Solyc02g081060.2.1 | 2.720736 | 2.306208 | 2.94E-05 | 0.000314 | 693    | 301    | 470    | 49    | 68    | 31   |
| Solyc04g082310.2.1 | 2.733503 | 4.36678  | 2.64E-08 | 6.58E-07 | 930    | 3756   | 2847   | 122   | 273   | 204  |
| Solyc11g044530.1.1 | 2.733837 | 2.43492  | 9.91E-05 | 0.000898 | 594    | 533    | 589    | 101   | 39    | 15   |
| Solyc07g063190.2.1 | 2.735341 | 6.706458 | 1.41E-08 | 3.80E-07 | 10444  | 13785  | 10707  | 1372  | 934   | 679  |
| Solyc06g051860.1.1 | 2.73788  | 2.679654 | 0.00143  | 0.008599 | 44     | 1277   | 1106   | 30    | 145   | 33   |
| Solyc11g010600.1.1 | 2.739341 | 6.721193 | 8.69E-09 | 2.44E-07 | 6620   | 18433  | 12834  | 1254  | 1366  | 543  |
| Solyc02g087400.1.1 | 2.739346 | 4.258805 | 2.64E-10 | 1.03E-08 | 2038   | 2493   | 1821   | 204   | 240   | 121  |
| Solyc01g099980.2.1 | 2.73979  | 3.236118 | 6.53E-06 | 8.47E-05 | 280    | 2186   | 1172   | 124   | 112   | 43   |
| Solyc06g007160.2.1 | 2.740297 | 0.346529 | 0.000448 | 0.003224 | 114    | 162    | 135    | 18    | 8     | 8    |
| Solyc06g082910.2.1 | 2.740417 | 3.836633 | 1.20E-05 | 0.000142 | 497    | 2463   | 2240   | 42    | 285   | 118  |
| Solyc11g072510.1.1 | 2.741216 | 2.451407 | 1.32E-06 | 2.11E-05 | 386    | 780    | 708    | 61    | 44    | 46   |
| Solyc09g076030.2.1 | 2.742408 | 2.249243 | 1.54E-05 | 0.000178 | 336    | 709    | 595    | 22    | 107   | 24   |
| Solyc08g016080.2.1 | 2.743148 | 5.101693 | 6.85E-05 | 0.000654 | 6212   | 2935   | 1092   | 553   | 298   | 141  |
| Solyc01g088610.2.1 | 2.743535 | 4.474704 | 8.95E-08 | 1.94E-06 | 925    | 3887   | 3274   | 117   | 304   | 223  |
| Solyc05g013510.2.1 | 2.744241 | 3.989263 | 3.42E-09 | 1.04E-07 | 1951   | 2091   | 1173   | 164   | 193   | 107  |
| Solyc02g071720.2.1 | 2.744253 | 0.049544 | 0.001714 | 0.009993 | 41     | 164    | 150    | 3     | 16    | 10   |
| Solyc12g010230.1.1 | 2.746448 | 0.284345 | 0.000615 | 0.004203 | 78     | 184    | 149    | 17    | 15    | 3    |
| Solyc01g057260.2.1 | 2.746716 | 2.68874  | 4.17E-07 | 7.62E-06 | 658    | 873    | 619    | 46    | 114   | 38   |
| Solyc11g044940.1.1 | 2.746924 | 1.84433  | 6.29E-06 | 2.00E-05 | 185    | 607    | 484    | 32    | 44    | 27   |
| Solyc01g104950.2.1 | 2.748743 | 7.615717 | 3.86E-05 | 0.000399 | 33791  | 14378  | 9951   | 3028  | 1580  | 974  |
| Solyc10g085600.1.1 | 2.751176 | 2.455584 | 1.31E-06 | 2.10E-05 | 311    | 909    | 726    | 35    | 89    | 40   |
| Solyc02g090900.2.1 | 2.751314 | 2.187943 | 4.29E-05 | 0.000438 | 254    | 699    | 642    | 15    | 100   | 29   |
| Solyc09g007110.2.1 | 2.7532   | 2.98407  | 5.98E-06 | 7.85E-05 | 321    | 1446   | 1126   | 32    | 114   | 82   |
| Solyc02g081980.2.1 | 2.755961 | 2.136886 | 0.001021 | 0.006453 | 589    | 244    | 469    | 88    | 13    | 17   |
| Solyc10g080390.1.1 | 2.759353 | 3.056171 | 6.31E-07 | 1.10E-05 | 825    | 1112   | 843    | 123   | 66    | 44   |
| Solyc06g005710.2.1 | 2.763764 | 4.519969 | 0.000117 | 0.001035 | 4183   | 1253   | 1149   | 391   | 144   | 102  |
| Solyc10g054110.1.1 | 2.764599 | 4.41084  | 1.62E-06 | 2.51E-05 | 671    | 6485   | 1647   | 264   | 246   | 109  |
| Solyc06g068950.2.1 | 2.765698 | 1.288491 | 1.78E-05 | 0.000203 | 183    | 364    | 286    | 27    | 25    | 16   |
| Solyc08g007240.2.1 | 2.765781 | 6.432898 | 4.24E-06 | 5.80E-05 | 11957  | 8606   | 6598   | 1393  | 488   | 481  |
| Solyc08g029090.2.1 | 2.765994 | 1.367527 | 5.85E-05 | 0.000572 | 116    | 635    | 238    | 16    | 40    | 19   |
| Solyc03g117850.2.1 | 2.766108 | 4.371509 | 0.000172 | 0.001431 | 3834   | 1511   | 720    | 360   | 158   | 69   |
| Solyc02g092810.2.1 | 2.770092 | 2.358866 | 1.13E-05 | 0.000135 | 388    | 615    | 709    | 27    | 43    | 65   |
| Solyc08g067840.2.1 | 2.774192 | 3.065438 | 3.71E-07 | 6.89E-06 | 734    | 901    | 1110   | 105   | 65    | 59   |
| Solyc06g075090.2.1 | 2.774595 | 1.671592 | 0.000125 | 0.001091 | 376    | 623    | 115    | 22    | 62    | 14   |
| Solyc02g037530.2.1 | 2.774636 | 3.417971 | 2.78E-08 | 6.86E-07 | 589    | 2112   | 1241   | 71    | 173   | 74   |
| Solyc03g097380.2.1 | 2.77514  | 2.339612 | 1.99E-06 | 3.02E-05 | 332    | 1113   | 440    | 32    | 58    | 50   |
| Solyc02g080530.2.1 | 2.775309 | 6.880355 | 9.05E-09 | 2.54E-07 | 9534   | 22215  | 10756  | 1541  | 1236  | 603  |
| Solyc03g118740.2.1 | 2.775914 | 1.595465 | 2.43E-05 | 0.000264 | 185    | 483    | 389    | 13    | 50    | 25   |
| Solyc01g094690.2.1 | 2.777671 | 2.882148 | 1.68E-06 | 2.59E-05 | 418    | 854    | 1220   | 54    | 66    | 78   |
| Solyc06g071290.2.1 | 2.782645 | 3.625126 | 3.39E-05 | 0.000358 | 1869   | 1060   | 843    | 213   | 57    | 61   |
| Solyc07g007260.2.1 | 2.784254 | 0.177786 | 0.001595 | 0.009402 | 151    | 50     | 120    | 10    | 11    | 9    |
| Solyc08g066450.1.1 | 2.785221 | 0.414296 | 0.000395 | 0.002898 | 132    | 122    | 160    | 6     | 25    | 8    |
| Solyc03g053110.2.1 | 2.787959 | 5.582862 | 6.84E-10 | 2.41E-08 | 4753   | 5815   | 5351   | 595   | 466   | 284  |
| Solyc08g082890.2.1 | 2.789327 | 3.200734 | 2.88E-05 | 0.000309 | 197    | 1370   | 1736   | 61    | 96    | 93   |
| Solyc10g008270.2.1 | 2.790493 | 3.737612 | 1.15E-06 | 1.87E-05 | 1978   | 1581   | 692    | 156   | 185   | 53   |
| Solyc01g080580.2.1 | 2.790731 | 1.986053 | 6.79E-06 | 8.75E-05 | 493    | 540    | 267    | 39    | 56    | 20   |
| Solyc12g014040.1.1 | 2.792546 | 0.44703  | 0.001284 | 0.007835 | 70     | 176    | 210    | 14    | 14    | 15   |
| Solyc04g009180.1.1 | 2.792834 | 3.172425 | 2.17E-05 | 0.000239 | 408    | 1552   | 1305   | 21    | 185   | 69   |
| Solyc03g033410.2.1 | 2.793918 | 3.027193 | 4.55E-05 | 0.000459 | 186    | 1508   | 1338   | 32    | 146   | 64   |
| Solyc09g009040.2.1 | 2.794273 | 4.848963 | 3.22E-08 | 7.82E-07 | 1010   | 5267   | 4379   | 243   | 444   | 166  |
| Solyc07g039190.2.1 | 2.795966 | 2.940262 | 1.56E-07 | 3.14E-06 | 517    | 1246   | 947    | 96    | 88    | 35   |
| Solyc09g061930.2.1 | 2.796952 | 1.560649 | 1.01E-05 | 0.000123 | 168    | 462    | 402    | 26    | 30    | 24   |
| Solyc08g062960.2.1 | 2.798364 | 2.817996 | 1.27E-05 | 0.00015  | 993    | 782    | 460    | 97    | 87    | 21   |
| Solyc10g080940.1.1 | 2.798506 | 4.789169 | 1.15E-11 | 5.90E-10 | 1943   | 4241   | 3514   | 263   | 368   | 167  |
| Solyc04g072030.1.1 | 2.800695 | 3.251021 | 4.24E-06 | 5.80E-05 | 313    | 1587   | 1559   | 45    | 128   | 93   |
| Solyc12g008420.1.1 | 2.801847 | 2.285641 | 5.38E-07 | 9.58E-06 | 328    | 850    | 559    | 36    | 61    | 39   |
| Solyc06g084320.1.1 | 2.801999 | 1.911623 | 0.000114 | 0.00101  | 355    | 752    | 240    | 66    | 19    | 15   |
| Solyc02g085750.2.1 | 2.802606 | 2.325    | 0.000927 | 0.005964 | 629    | 509    | 448    | 4     | 134   | 25   |
| Solyc11g010810.1.1 | 2.805537 | 4.97278  | 2.16E-11 | 1.06E-09 | 1936   | 5029   | 4199   | 260   | 426   | 214  |
| Solyc01g103360.2.1 | 2.807861 | 0.312856 | 0.001569 | 0.009285 | 169    | 90     | 108    | 5     | 29    | 4    |
| Solyc05g009680.1.1 | 2.808591 | 3.675914 | 1.10E-06 | 1.79E-05 | 565    | 2245   | 1849   | 46    | 163   | 141  |
| Solyc11g012360.1.1 | 2.813311 | 5.301521 | 3.61E-05 | 0.000377 | 5752   | 5868   | 1456   | 683   | 338   | 89   |
| Solyc04g079340.2.1 | 2.813653 | 2.214139 | 2.73E-06 | 3.94E-05 | 492    | 485    | 517    | 29    | 51    | 45   |
| Solyc02g086740.1.1 | 2.815061 | 4.186279 | 4.33E-05 | 0.000441 | 2665   | 1358   | 1513   | 339   | 85    | 62   |
| Solyc03g114850.2.1 | 2.815803 | 2.81242  | 1.86E-05 | 0.00021  | 229    | 1555   | 906    | 24    | 107   | 67   |
| Solyc08g076880.2.1 | 2.816245 | 5.008763 | 1.51E-06 | 2.37E-05 | 1335   | 9581   | 2302   | 125   | 613   | 228  |
| Solyc05g012680.2.1 | 2.816868 | 1.131617 | 0.001223 | 0.007518 | 42     | 402    | 360    | 5     | 35    | 21   |
| Solyc04g015490.2.1 | 2.819421 | 4.730077 | 4.10E-05 | 0.00042  | 3046   | 3360   | 2376   | 536   | 126   | 54   |
| Solyc08g006260.1.1 | 2.819482 | 0.492392 | 0.000251 | 0.001977 | 62     | 265    | 178    | 11    | 23    | 6    |
| Solyc12g044410.1.1 | 2.819711 | 2.886473 | 1.18E-07 | 2.47E-06 | 400    | 1384   | 921    | 63    | 111   | 40   |
| Solyc04g007790.2.1 | 2.819868 | 7.862704 | 2.68E-09 | 8.28E-08 | 16958  | 34697  | 29730  | 2433  | 2959  | 1256 |
| Solyc12g044840.1.1 | 2.821854 | -0.28575 | 0.001223 | 0.007517 | 38     | 162    | 90     | 5     | 15    | 3    |
| Solyc11g072610.1.1 | 2.825995 | 0.665528 | 8.26E-05 | 0.000768 | 139    | 234    | 159    | 11    | 15    | 15   |
| Solyc03g080010.2.1 | 2.826475 | 3.639481 | 2.46E-10 | 9.61E-09 | 930    | 1995   | 1463   | 107   | 143   | 93   |
| Solyc02g092590.2.1 | 2.832453 | 3.282365 | 1.39E-07 | 2.86E-06 | 1168   | 1109   | 880    | 116   | 118   | 41   |
| Solyc09g060100.2.1 | 2.835165 | 1.913986 | 3.59E-05 | 0.000375 | 258    | 654    | 428    | 62    | 27    | 12   |
| Solyc08g082170.2.1 | 2.835675 | 4.691817 | 6.82E-12 | 3.65E-10 | 1886   | 3928   | 3245   | 254   | 274   | 178  |
| Solyc03g119060.2.1 | 2.835835 | 5.867745 | 1.21E-10 | 4.97E-09 | 3698   | 11308  | 6503   | 463   | 789   | 395  |
| Solyc07g064600.2.1 | 2.838315 | 10.82231 | 3.17E-05 | 0.000337 | 113461 | 171044 | 318095 | 32261 | 11580 | 5110 |
| Solyc06g074070.2.1 | 2.839505 | 1.371243 | 5.07E-05 | 0.000505 | 243    | 288    | 311    | 37    | 24    | 9    |
| Solyc10g075070.1.1 | 2.843007 | 7.748946 | 0.000636 | 0.004336 | 1910   | 56377  | 29192  | 510   | 4544  | 1466 |
| Solyc07g064830.2.1 | 2.844287 | 2.515273 | 2.09E-05 | 0.000232 | 184    | 1184   | 794    | 23    | 106   | 38   |
| Solyc11g011980.1.1 | 2.844548 | 2.981986 | 1.51E-06 | 2.37E-05 | 973    | 1054   | 587    | 58    | 154   | 27   |
| Solyc03g113210.2.1 | 2.84693  | 3.123474 | 3.00E-07 | 5.68E-06 | 624    | 895    | 1375   | 47    | 129   | 68   |

|                    |          |          |          |          |        |         |         |        |       |       |
|--------------------|----------|----------|----------|----------|--------|---------|---------|--------|-------|-------|
| Solyc09g090510.2.1 | 2.848648 | 5.396807 | 8.38E-05 | 0.000778 | 6769   | 3452    | 2616    | 799    | 219   | 102   |
| Solyc01g104860.2.1 | 2.849061 | 1.33429  | 0.001042 | 0.006554 | 381    | 196     | 180     | 43     | 23    | 3     |
| Solyc06g054260.1.1 | 2.854727 | 8.15516  | 0.000362 | 0.002684 | 52268  | 17447   | 13574   | 5316   | 1384  | 805   |
| Solyc03g044470.2.1 | 2.855776 | 4.019003 | 1.46E-07 | 2.98E-06 | 899    | 2807    | 2172    | 53     | 281   | 130   |
| Solyc08g066940.2.1 | 2.856735 | 4.250299 | 6.72E-07 | 1.16E-05 | 557    | 3716    | 2901    | 92     | 228   | 188   |
| Solyc10g081490.1.1 | 2.860542 | 2.173251 | 0.000675 | 0.004554 | 679    | 381     | 318     | 83     | 34    | 5     |
| Solyc07g049310.2.1 | 2.861939 | 2.562673 | 2.17E-06 | 3.23E-05 | 501    | 810     | 703     | 86     | 52    | 21    |
| Solyc02g067310.2.1 | 2.864765 | 3.067178 | 1.26E-06 | 2.02E-05 | 359    | 1461    | 1240    | 40     | 90    | 88    |
| Solyc08g006540.2.1 | 2.867607 | 2.613882 | 9.02E-07 | 1.51E-05 | 552    | 811     | 706     | 69     | 34    | 50    |
| Solyc05g041430.2.1 | 2.868806 | 1.372768 | 0.000271 | 0.002113 | 400    | 173     | 194     | 35     | 27    | 8     |
| Solyc08g081940.2.1 | 2.869236 | 2.91698  | 4.32E-08 | 1.01E-06 | 753    | 983     | 798     | 80     | 62    | 54    |
| Solyc11g066510.1.1 | 2.87019  | 2.198455 | 1.26E-05 | 0.000149 | 258    | 872     | 551     | 14     | 84    | 33    |
| Solyc05g015310.2.1 | 2.870249 | 2.563891 | 2.88E-07 | 5.48E-06 | 299    | 1069    | 790     | 45     | 71    | 43    |
| Solyc01g008920.2.1 | 2.871785 | 2.408645 | 1.80E-05 | 0.000205 | 839    | 433     | 339     | 63     | 45    | 31    |
| Solyc03g020080.2.1 | 2.872835 | 5.754202 | 8.47E-05 | 0.000785 | 6147   | 5481    | 5845    | 1082   | 201   | 113   |
| Solyc11g071620.1.1 | 2.875385 | 4.453166 | 6.41E-10 | 2.27E-08 | 2037   | 2747    | 2598    | 276    | 174   | 124   |
| Solyc04g009720.1.1 | 2.875518 | 0.558095 | 9.58E-05 | 0.000871 | 95     | 298     | 138     | 10     | 14    | 13    |
| Solyc09g075960.1.1 | 2.876203 | 0.343797 | 0.000183 | 0.001508 | 93     | 126     | 188     | 10     | 15    | 8     |
| Solyc03g118410.2.1 | 2.879522 | 3.535695 | 8.34E-08 | 1.82E-06 | 1375   | 1218    | 1153    | 153    | 102   | 53    |
| Solyc02g080540.1.1 | 2.880225 | 6.008175 | 0.001552 | 0.009209 | 10290  | 4992    | 4300    | 1425   | 159   | 66    |
| Solyc02g089550.2.1 | 2.882517 | 2.374253 | 4.34E-07 | 7.91E-06 | 469    | 595     | 656     | 38     | 77    | 29    |
| Solyc02g083130.2.1 | 2.882518 | 1.730722 | 1.33E-05 | 0.000157 | 213    | 516     | 435     | 46     | 28    | 13    |
| Solyc09g007150.2.1 | 2.885229 | 4.443701 | 1.12E-09 | 3.74E-08 | 978    | 4260    | 2907    | 226    | 229   | 127   |
| Solyc06g006110.2.1 | 2.88683  | 4.978688 | 4.38E-11 | 2.00E-09 | 2701   | 3276    | 4475    | 284    | 331   | 220   |
| Solyc04g050920.2.1 | 2.888666 | 3.518634 | 1.07E-07 | 2.28E-06 | 422    | 2265    | 1626    | 89     | 172   | 60    |
| Solyc06g082810.2.1 | 2.888936 | 2.154364 | 1.90E-05 | 0.000214 | 159    | 988     | 557     | 18     | 57    | 42    |
| Solyc01g095670.2.1 | 2.889901 | 4.111153 | 1.14E-08 | 3.12E-07 | 2119   | 1915    | 1580    | 221    | 164   | 76    |
| Solyc06g054270.2.1 | 2.890826 | 4.335365 | 7.87E-08 | 1.72E-06 | 1902   | 4332    | 1224    | 286    | 183   | 71    |
| Solyc07g008540.2.1 | 2.891779 | 4.046092 | 8.38E-10 | 2.90E-08 | 1323   | 2569    | 1910    | 74     | 238   | 137   |
| Solyc07g047850.2.1 | 2.895564 | 6.416049 | 0.000457 | 0.003275 | 16054  | 6526    | 2828    | 1596   | 345   | 234   |
| Solyc12g087940.1.1 | 2.899319 | 1.601691 | 0.001056 | 0.006626 | 485    | 159     | 240     | 52     | 24    | 4     |
| Solyc09g007360.2.1 | 2.901303 | 2.351839 | 2.75E-05 | 0.000296 | 392    | 719     | 648     | 10     | 61    | 59    |
| Solyc02g065280.2.1 | 2.904174 | 4.388061 | 2.50E-05 | 0.000271 | 276    | 4638    | 3287    | 89     | 296   | 178   |
| Solyc05g007470.2.1 | 2.904267 | 5.399479 | 1.35E-05 | 0.000159 | 1168   | 10248   | 5316    | 91     | 802   | 313   |
| Solyc03g121300.2.1 | 2.905349 | 4.011196 | 6.79E-09 | 1.96E-07 | 1394   | 2181    | 1951    | 213    | 160   | 58    |
| Solyc04g081760.2.1 | 2.906144 | 1.308124 | 1.41E-05 | 0.000164 | 256    | 356     | 220     | 16     | 21    | 24    |
| Solyc04g080580.2.1 | 2.909966 | 6.460282 | 0.000639 | 0.004353 | 19321  | 2863    | 1980    | 1185   | 700   | 402   |
| Solyc04g076260.1.1 | 2.910937 | 1.034122 | 0.001469 | 0.008788 | 79     | 373     | 293     | 1      | 33    | 20    |
| Solyc06g050350.2.1 | 2.912127 | 1.614219 | 2.27E-05 | 0.00025  | 242    | 407     | 390     | 9      | 40    | 30    |
| Solyc06g005970.2.1 | 2.913469 | 3.393594 | 1.89E-07 | 3.77E-06 | 365    | 2059    | 1534    | 65     | 133   | 80    |
| Solyc11g040340.1.1 | 2.91377  | 1.075188 | 0.001211 | 0.007456 | 34     | 227     | 461     | 8      | 27    | 19    |
| Solyc09g091510.2.1 | 2.916369 | 2.147314 | 2.58E-06 | 3.75E-05 | 292    | 999     | 382     | 56     | 38    | 20    |
| Solyc05g056300.2.1 | 2.91712  | 5.316634 | 0.000249 | 0.001965 | 7559   | 2743    | 1445    | 697    | 268   | 75    |
| Solyc11g070000.1.1 | 2.918447 | 0.703208 | 4.05E-05 | 0.000417 | 119    | 286     | 167     | 11     | 15    | 14    |
| Solyc01g091050.2.1 | 2.919924 | 3.64011  | 8.61E-05 | 0.000796 | 2177   | 924     | 634     | 206    | 89    | 29    |
| Solyc08g079550.1.1 | 2.921764 | 1.902387 | 0.000161 | 0.001351 | 193    | 519     | 593     | 59     | 10    | 20    |
| Solyc04g007210.2.1 | 2.927168 | 3.509214 | 1.92E-09 | 6.12E-08 | 1297   | 1477    | 1033    | 90     | 162   | 58    |
| Solyc01g087060.2.1 | 2.936492 | 0.292686 | 0.000815 | 0.005341 | 200    | 84      | 72      | 8      | 18    | 6     |
| Solyc04g006970.2.1 | 2.93808  | 3.93325  | 3.29E-08 | 7.98E-07 | 696    | 4018    | 1390    | 164    | 180   | 63    |
| Solyc03g111050.2.1 | 2.940547 | 3.227466 | 1.22E-06 | 1.96E-05 | 315    | 1961    | 1304    | 39     | 128   | 78    |
| Solyc04g072550.1.1 | 2.94208  | -0.76789 | 0.001614 | 0.009495 | 22     | 91      | 84      | 4      | 7     | 3     |
| Solyc10g080840.1.1 | 2.943725 | 3.038035 | 1.42E-07 | 2.92E-06 | 800    | 1272    | 779     | 109    | 54    | 41    |
| Solyc10g055240.1.1 | 2.944654 | 2.837403 | 1.06E-06 | 1.74E-05 | 652    | 1364    | 566     | 98     | 35    | 40    |
| Solyc05g006050.2.1 | 2.945106 | 4.5561   | 7.85E-08 | 1.72E-06 | 921    | 4675    | 3304    | 88     | 309   | 212   |
| Solyc03g115980.1.1 | 2.948304 | 5.063232 | 0.001292 | 0.007877 | 6426   | 2187    | 1204    | 683    | 92    | 47    |
| Solyc10g008510.1.1 | 2.952902 | 1.57165  | 5.92E-05 | 0.000578 | 482    | 227     | 184     | 23     | 27    | 23    |
| Solyc02g066930.2.1 | 2.954042 | 2.857944 | 1.13E-08 | 3.08E-07 | 477    | 1267    | 879     | 50     | 80    | 54    |
| Solyc05g005540.2.1 | 2.956117 | 2.585954 | 3.07E-05 | 0.000327 | 235    | 570     | 1229    | 68     | 30    | 44    |
| Solyc08g079840.1.1 | 2.957013 | 3.106994 | 6.93E-08 | 1.55E-06 | 861    | 1208    | 874     | 104    | 52    | 53    |
| Solyc04g008500.2.1 | 2.959294 | 3.486292 | 7.26E-10 | 2.55E-08 | 729    | 2155    | 1256    | 72     | 160   | 66    |
| Solyc06g006040.1.1 | 2.959487 | 3.571338 | 3.62E-10 | 1.35E-08 | 1280   | 1917    | 940     | 81     | 135   | 87    |
| Solyc01g090680.2.1 | 2.961894 | 5.531499 | 8.05E-09 | 2.29E-07 | 6510   | 5356    | 3153    | 519    | 465   | 209   |
| Solyc02g065220.2.1 | 2.971391 | 4.588887 | 2.80E-11 | 1.33E-09 | 1474   | 4564    | 2877    | 133    | 323   | 170   |
| Solyc12g009540.1.1 | 2.97684  | 1.331561 | 0.000196 | 0.001603 | 81     | 278     | 504     | 28     | 30    | 7     |
| Solyc06g061230.2.1 | 2.97951  | 4.804745 | 5.51E-06 | 7.31E-05 | 465    | 3661    | 5939    | 175    | 343   | 197   |
| Solyc07g018070.2.1 | 2.980253 | 2.935233 | 0.000279 | 0.002162 | 143    | 1311    | 1395    | 16     | 55    | 102   |
| Solyc02g077270.2.1 | 2.98087  | 3.258492 | 1.90E-08 | 4.92E-07 | 514    | 1950    | 1139    | 48     | 133   | 67    |
| Solyc08g079680.2.1 | 2.98144  | 2.089651 | 5.99E-07 | 1.05E-05 | 412    | 510     | 499     | 42     | 49    | 18    |
| Solyc03g096890.1.1 | 2.983739 | 0.071402 | 0.000513 | 0.003598 | 98     | 61      | 158     | 9      | 10    | 6     |
| Solyc06g054320.1.1 | 2.985299 | 0.449925 | 6.61E-05 | 0.000635 | 76     | 248     | 164     | 11     | 14    | 8     |
| Solyc05g054680.1.1 | 2.986923 | 1.796302 | 1.98E-06 | 3.01E-05 | 311    | 529     | 364     | 16     | 57    | 19    |
| Solyc09g082580.2.1 | 2.987214 | 3.007004 | 6.11E-09 | 1.77E-07 | 622    | 1282    | 946     | 48     | 82    | 67    |
| Solyc07g020790.2.1 | 2.987272 | 1.840066 | 4.19E-06 | 5.75E-05 | 184    | 630     | 490     | 35     | 46    | 12    |
| Solyc03g013290.1.1 | 2.991447 | -0.20102 | 0.000543 | 0.003779 | 105    | 107     | 63      | 5      | 14    | 3     |
| Solyc08g008270.2.1 | 2.991736 | 1.766035 | 2.69E-05 | 0.00029  | 113    | 593     | 545     | 24     | 55    | 12    |
| Solyc04g007110.2.1 | 2.992035 | 2.304393 | 6.49E-07 | 1.13E-05 | 478    | 652     | 544     | 60     | 39    | 22    |
| Solyc07g063860.2.1 | 2.996582 | 2.855827 | 5.33E-07 | 9.49E-06 | 340    | 1317    | 1022    | 30     | 121   | 42    |
| Solyc06g060830.2.1 | 2.996783 | 2.051342 | 5.86E-06 | 7.72E-05 | 135    | 930     | 538     | 26     | 43    | 32    |
| Solyc12g010020.1.1 | 3.002132 | 13.41832 | 5.18E-06 | 6.92E-05 | 463445 | 1381480 | 2023930 | 160790 | 77194 | 32680 |
| Solyc12g008430.1.1 | 3.005254 | -0.0666  | 0.000722 | 0.00483  | 28     | 213     | 115     | 9      | 8     | 5     |
| Solyc05g048830.2.1 | 3.00711  | 1.417575 | 3.80E-05 | 0.000394 | 125    | 636     | 271     | 8      | 41    | 19    |
| Solyc01g095430.2.1 | 3.008733 | 6.506504 | 0.000375 | 0.002767 | 18599  | 3678    | 3485    | 1469   | 400   | 294   |
| Solyc05g005920.2.1 | 3.008836 | 3.785933 | 6.62E-08 | 1.49E-06 | 414    | 2961    | 1967    | 93     | 136   | 106   |
| Solyc01g005100.2.1 | 3.009307 | 3.231234 | 1.24E-09 | 4.08E-08 | 687    | 1654    | 1062    | 75     | 78    | 71    |

|                    |          |          |          |          |       |        |        |       |      |      |
|--------------------|----------|----------|----------|----------|-------|--------|--------|-------|------|------|
| Solyc12g019450.1.1 | 3.012247 | -0.52262 | 0.001546 | 0.009182 | 87    | 91     | 40     | 3     | 5    | 7    |
| Solyc06g036310.2.1 | 3.012722 | 2.652048 | 3.26E-07 | 6.13E-06 | 375   | 1623   | 482    | 31    | 85   | 43   |
| Solyc12g010030.1.1 | 3.018401 | 9.913585 | 3.50E-06 | 4.90E-05 | 39056 | 108127 | 189514 | 13140 | 7274 | 3256 |
| Solyc01g088250.2.1 | 3.019729 | 2.603756 | 3.01E-06 | 4.29E-05 | 202   | 980    | 1042   | 29    | 87   | 39   |
| Solyc11g012640.1.1 | 3.020436 | 1.923425 | 1.57E-05 | 0.000181 | 111   | 636    | 646    | 24    | 36   | 30   |
| Solyc02g086180.2.1 | 3.023941 | 5.342485 | 0.000712 | 0.004772 | 4877  | 9392   | 869    | 791   | 87   | 66   |
| Solyc02g089700.2.1 | 3.026133 | 1.455384 | 1.24E-05 | 0.000147 | 243   | 433    | 280    | 9     | 49   | 14   |
| Solyc09g065780.2.1 | 3.027758 | 3.164366 | 0.000338 | 0.002544 | 1596  | 766    | 373    | 158   | 40   | 15   |
| Solyc04g014650.2.1 | 3.028949 | 1.182743 | 0.000153 | 0.001292 | 131   | 460    | 250    | 3     | 39   | 16   |
| Solyc04g071620.2.1 | 3.030715 | 6.945004 | 8.18E-06 | 0.000102 | 15521 | 23333  | 5117   | 1782  | 1059 | 238  |
| Solyc01g094370.2.1 | 3.032922 | 4.470106 | 2.69E-12 | 1.53E-10 | 1752  | 4054   | 2289   | 182   | 293  | 94   |
| Solyc01g111630.2.1 | 3.033942 | 7.234296 | 0.000676 | 0.004562 | 27749 | 10203  | 7039   | 2854  | 442  | 228  |
| Solyc06g075500.2.1 | 3.034445 | 2.994479 | 2.49E-07 | 4.85E-06 | 511   | 1387   | 1005   | 25    | 134  | 49   |
| Solyc12g006630.1.1 | 3.036292 | 1.861728 | 2.90E-05 | 0.00031  | 94    | 688    | 585    | 16    | 49   | 25   |
| Solyc10g055780.1.1 | 3.038149 | 1.239954 | 6.38E-05 | 0.000617 | 350   | 218    | 165    | 27    | 22   | 8    |
| Solyc05g006550.2.1 | 3.038497 | 3.882844 | 0.000724 | 0.004843 | 3320  | 450    | 284    | 198   | 104  | 52   |
| Solyc04g040220.2.1 | 3.041628 | 1.387876 | 0.000144 | 0.001228 | 64    | 484    | 429    | 15    | 46   | 8    |
| Solyc10g009190.1.1 | 3.043274 | 3.039615 | 1.30E-06 | 2.08E-05 | 298   | 2050   | 928    | 34    | 140  | 42   |
| Solyc09g007850.2.1 | 3.043432 | 7.437721 | 3.46E-08 | 8.29E-07 | 24611 | 15555  | 14822  | 1807  | 1436 | 912  |
| Solyc07g055740.1.1 | 3.04351  | 2.90542  | 6.40E-08 | 1.45E-06 | 963   | 1015   | 532    | 37    | 96   | 52   |
| Solyc10g006970.2.1 | 3.044042 | 4.96305  | 2.49E-05 | 0.00027  | 6082  | 1609   | 1362   | 407   | 183  | 140  |
| Solyc07g055050.2.1 | 3.045077 | 4.94136  | 1.04E-10 | 4.36E-09 | 3645  | 2605   | 3601   | 237   | 366  | 163  |
| Solyc08g015830.1.1 | 3.04552  | 0.053987 | 0.000349 | 0.002611 | 139   | 125    | 64     | 4     | 15   | 6    |
| Solyc12g044260.1.1 | 3.04562  | 1.85786  | 2.62E-06 | 3.81E-05 | 228   | 639    | 449    | 13    | 57   | 22   |
| Solyc02g077850.2.1 | 3.048336 | 3.867702 | 7.82E-11 | 3.37E-09 | 896   | 2598   | 1871   | 82    | 156  | 112  |
| Solyc08g081220.1.1 | 3.053704 | 1.166883 | 0.000288 | 0.002218 | 292   | 263    | 171    | 37    | 9    | 5    |
| Solyc03g071590.2.1 | 3.056247 | 3.042535 | 8.77E-05 | 0.000807 | 594   | 1344   | 1019   | 149   | 33   | 10   |
| Solyc01g014270.2.1 | 3.056771 | 2.132741 | 3.04E-05 | 0.000324 | 409   | 643    | 466    | 70    | 25   | 8    |
| Solyc03g031940.2.1 | 3.059965 | 2.842062 | 5.35E-05 | 0.00053  | 944   | 772    | 611    | 108   | 61   | 7    |
| Solyc04g078740.2.1 | 3.061129 | 2.195366 | 7.31E-07 | 1.25E-05 | 274   | 645    | 695    | 34    | 65   | 17   |
| Solyc03g121970.1.1 | 3.061501 | 3.756465 | 1.63E-11 | 8.19E-10 | 1303  | 1748   | 1569   | 98    | 165  | 71   |
| Solyc12g070120.1.1 | 3.061867 | 0.168598 | 0.00027  | 0.002103 | 49    | 223    | 138    | 4     | 11   | 10   |
| Solyc06g051940.2.1 | 3.062327 | 3.290734 | 1.44E-06 | 2.29E-05 | 242   | 1526   | 1834   | 83    | 113  | 45   |
| Solyc02g090260.1.1 | 3.063903 | 3.211226 | 3.60E-09 | 1.09E-07 | 1007  | 1346   | 833    | 68    | 67   | 75   |
| Solyc11g021360.1.1 | 3.064225 | 0.814608 | 0.001513 | 0.009016 | 224   | 134    | 184    | 1     | 41   | 6    |
| Solyc09g091100.2.1 | 3.065249 | 3.473723 | 6.85E-10 | 2.41E-08 | 1359  | 1458   | 917    | 98    | 101  | 64   |
| Solyc05g050090.2.1 | 3.065941 | 2.800252 | 4.46E-07 | 8.09E-06 | 421   | 880    | 1124   | 25    | 78   | 61   |
| Solyc04g051470.1.1 | 3.070105 | 0.281814 | 0.000578 | 0.003984 | 24    | 252    | 180    | 8     | 16   | 5    |
| Solyc01g109790.2.1 | 3.070282 | 4.215485 | 5.83E-11 | 2.58E-09 | 920   | 4168   | 2120   | 152   | 195  | 101  |
| Solyc06g061090.2.1 | 3.070526 | 1.020024 | 2.92E-05 | 0.000312 | 131   | 310    | 271    | 6     | 29   | 14   |
| Solyc07g065500.1.1 | 3.072849 | 4.169132 | 0.000354 | 0.002635 | 3535  | 919    | 764    | 295   | 39   | 64   |
| Solyc09g072690.1.1 | 3.073354 | 3.149136 | 1.88E-06 | 2.88E-05 | 583   | 874    | 1537   | 24    | 92   | 88   |
| Solyc02g078950.2.1 | 3.075063 | 2.162057 | 3.38E-06 | 4.75E-05 | 156   | 718    | 761    | 40    | 36   | 27   |
| Solyc05g053550.2.1 | 3.076086 | 2.79181  | 1.81E-05 | 0.000205 | 327   | 1778   | 657    | 75    | 95   | 8    |
| Solyc01g090790.2.1 | 3.077745 | 5.099919 | 8.80E-12 | 4.61E-10 | 3831  | 5104   | 2944   | 254   | 480  | 136  |
| Solyc01g009570.2.1 | 3.077915 | 1.887155 | 6.55E-07 | 1.14E-05 | 251   | 452    | 566    | 30    | 34   | 22   |
| Solyc03g025430.1.1 | 3.078878 | 0.0116   | 0.000412 | 0.002999 | 105   | 195    | 51     | 12    | 6    | 4    |
| Solyc06g083580.2.1 | 3.079816 | 1.796829 | 0.000748 | 0.004972 | 356   | 444    | 370    | 65    | 12   | 2    |
| Solyc01g094700.2.1 | 3.080682 | 3.008114 | 5.23E-05 | 0.000519 | 977   | 1185   | 589    | 139   | 32   | 13   |
| Solyc11g069190.1.1 | 3.080815 | 3.923996 | 1.39E-09 | 4.55E-08 | 744   | 2348   | 2415   | 92    | 134  | 122  |
| Solyc06g074110.2.1 | 3.082118 | 3.089048 | 1.49E-07 | 3.03E-06 | 284   | 1771   | 1222   | 60    | 105  | 43   |
| Solyc01g094720.2.1 | 3.085717 | 2.808449 | 9.09E-09 | 2.55E-07 | 521   | 1257   | 775    | 64    | 48   | 46   |
| Solyc03g116160.1.1 | 3.08894  | 2.174997 | 4.51E-07 | 8.16E-06 | 535   | 669    | 338    | 23    | 43   | 37   |
| Solyc10g077040.1.1 | 3.089954 | 5.892483 | 4.21E-08 | 9.90E-07 | 8252  | 6166   | 4825   | 737   | 379  | 250  |
| Solyc10g009080.2.1 | 3.090113 | 2.652586 | 1.11E-06 | 1.81E-05 | 638   | 648    | 790    | 59    | 24   | 51   |
| Solyc10g055390.1.1 | 3.092948 | 1.372196 | 0.001381 | 0.008348 | 130   | 451    | 362    | 0     | 37   | 24   |
| Solyc05g007130.2.1 | 3.094808 | 1.900996 | 6.71E-06 | 8.66E-05 | 110   | 771    | 549    | 32    | 36   | 19   |
| Solyc04g014730.2.1 | 3.096961 | 4.019049 | 2.77E-05 | 0.000298 | 303   | 2566   | 3161   | 47    | 321  | 65   |
| Solyc05g007790.2.1 | 3.098528 | -0.25841 | 0.001261 | 0.007709 | 131   | 80     | 40     | 5     | 13   | 2    |
| Solyc03g120850.2.1 | 3.099545 | 5.684385 | 4.04E-10 | 1.50E-08 | 2549  | 8763   | 7699   | 263   | 500  | 417  |
| Solyc12g095810.1.1 | 3.103041 | -0.22413 | 0.00168  | 0.009818 | 24    | 186    | 108    | 1     | 14   | 5    |
| Solyc01g099750.2.1 | 3.104034 | 4.135565 | 2.55E-11 | 1.22E-09 | 1529  | 2694   | 1999   | 73    | 220  | 126  |
| Solyc12g014490.1.1 | 3.105176 | 2.276383 | 7.55E-05 | 0.00071  | 67    | 1175   | 700    | 28    | 36   | 42   |
| Solyc06g071500.2.1 | 3.107377 | 4.160305 | 3.43E-07 | 6.41E-06 | 382   | 4643   | 2277   | 101   | 247  | 92   |
| Solyc01g006400.2.1 | 3.108557 | 10.20386 | 3.54E-06 | 4.94E-05 | 29093 | 146785 | 248145 | 12871 | 8682 | 5503 |
| Solyc08g081770.2.1 | 3.109401 | 3.134789 | 9.27E-09 | 2.59E-07 | 1052  | 928    | 903    | 57    | 118  | 40   |
| Solyc01g109150.2.1 | 3.109643 | 1.488802 | 0.000175 | 0.001454 | 100   | 353    | 533    | 37    | 25   | 4    |
| Solyc07g041920.2.1 | 3.110167 | 6.860241 | 0.001557 | 0.009231 | 19039 | 3844   | 11142  | 2150  | 103  | 256  |
| Solyc01g105050.2.1 | 3.110227 | 4.167598 | 1.41E-08 | 3.80E-07 | 2383  | 1715   | 1694   | 213   | 147  | 60   |
| Solyc12g096780.1.1 | 3.112399 | 3.386552 | 4.85E-06 | 6.55E-05 | 494   | 1407   | 1826   | 51    | 211  | 20   |
| Solyc06g074190.2.1 | 3.113561 | 2.990602 | 5.68E-07 | 1.00E-05 | 245   | 1899   | 1015   | 40    | 114  | 41   |
| Solyc02g085250.2.1 | 3.113744 | 2.091834 | 1.48E-07 | 3.02E-06 | 252   | 812    | 518    | 27    | 41   | 29   |
| Solyc06g073910.2.1 | 3.11432  | 0.182469 | 0.000119 | 0.001049 | 51    | 215    | 146    | 7     | 14   | 5    |
| Solyc07g007250.2.1 | 3.114379 | 10.62975 | 1.90E-05 | 0.000214 | 65697 | 186770 | 307213 | 23473 | 4852 | 6196 |
| Solyc02g068600.2.1 | 3.115282 | 2.060425 | 2.25E-06 | 3.34E-05 | 211   | 775    | 564    | 14    | 64   | 24   |
| Solyc02g080310.2.1 | 3.11563  | 0.852345 | 0.000209 | 0.001691 | 55    | 233    | 344    | 9     | 12   | 17   |
| Solyc04g072850.2.1 | 3.116064 | 3.024584 | 7.63E-08 | 1.68E-06 | 310   | 1456   | 1278   | 68    | 84   | 39   |
| Solyc03g005030.2.1 | 3.119333 | 3.099299 | 4.14E-08 | 9.76E-07 | 617   | 1372   | 1090   | 28    | 90   | 76   |
| Solyc01g073760.2.1 | 3.120253 | 1.793218 | 4.98E-07 | 8.96E-06 | 199   | 681    | 413    | 24    | 42   | 19   |
| Solyc12g008980.1.1 | 3.12034  | 3.188511 | 4.54E-06 | 6.17E-05 | 928   | 998    | 1119   | 128   | 23   | 43   |
| Solyc01g073750.2.1 | 3.123067 | 5.800468 | 7.42E-12 | 3.95E-10 | 3566  | 11354  | 6198   | 319   | 569  | 394  |
| Solyc10g009170.1.1 | 3.12438  | 0.255063 | 0.000114 | 0.001012 | 134   | 188    | 81     | 9     | 16   | 3    |
| Solyc11g065220.1.1 | 3.12654  | -0.44108 | 0.001174 | 0.002769 | 58    | 126    | 68     | 2     | 15   | 1    |
| Solyc06g008740.2.1 | 3.12705  | 2.652085 | 8.27E-06 | 0.000103 | 314   | 1127   | 892    | 13    | 123  | 27   |

|                     |          |          |          |          |       |       |       |      |     |     |
|---------------------|----------|----------|----------|----------|-------|-------|-------|------|-----|-----|
| Solyc09g010600.1.1  | 3.129405 | -0.63077 | 0.000619 | 0.00423  | 42    | 71    | 94    | 5    | 7   | 2   |
| Solyc08g078760.1.1  | 3.129633 | 2.262865 | 0.000336 | 0.002537 | 36    | 1576  | 471   | 39   | 59  | 17  |
| Solyc02g092970.2.1  | 3.132235 | 1.301187 | 4.02E-05 | 0.000414 | 164   | 292   | 384   | 31   | 9   | 12  |
| Solyc08g076650.2.1  | 3.137619 | 5.57912  | 1.51E-06 | 2.37E-05 | 883   | 11060 | 7186  | 173  | 669 | 307 |
| Solyc03g112580.2.1  | 3.139716 | 2.426623 | 1.54E-07 | 3.12E-06 | 462   | 720   | 677   | 20   | 55  | 45  |
| Solyc04g078470.2.1  | 3.140212 | 1.534802 | 4.95E-06 | 6.66E-05 | 158   | 404   | 459   | 27   | 17  | 18  |
| Solyc05g015510.2.1  | 3.140407 | 5.059746 | 2.16E-14 | 1.74E-12 | 3134  | 5076  | 3571  | 187  | 375 | 212 |
| Solyc05g008270.2.1  | 3.143763 | 2.613627 | 1.38E-07 | 2.85E-06 | 264   | 1112  | 912   | 48   | 71  | 25  |
| Solyc02g090100.1.1  | 3.144281 | 4.08687  | 6.29E-10 | 2.23E-08 | 1634  | 2486  | 1831  | 190  | 162 | 46  |
| Solyc07g045540.2.1  | 3.145452 | 2.952698 | 0.00031  | 0.002361 | 1268  | 487   | 589   | 130  | 36  | 7   |
| Solyc11g071800.1.1  | 3.148329 | 3.360592 | 6.85E-08 | 1.54E-06 | 348   | 2105  | 1509  | 51   | 139 | 55  |
| Solyc07g054210.2.1  | 3.148791 | 5.116909 | 7.63E-11 | 3.29E-09 | 4792  | 3378  | 3037  | 301  | 319 | 172 |
| Solyc04g078520.2.1  | 3.149535 | 0.903116 | 3.16E-05 | 0.000336 | 271   | 166   | 144   | 12   | 20  | 10  |
| Solyc03g118370.2.1  | 3.152109 | 2.007519 | 8.73E-05 | 0.000805 | 629   | 352   | 273   | 53   | 35  | 5   |
| Solyc02g068140.2.1  | 3.152851 | 2.970536 | 7.72E-08 | 1.70E-06 | 752   | 959   | 959   | 91   | 68  | 21  |
| Solyc07g041910.2.1  | 3.156344 | 6.08621  | 0.000754 | 0.00501  | 11156 | 2187  | 6592  | 1201 | 93  | 142 |
| Solyc05g0088350.2.1 | 3.157373 | 6.050193 | 1.22E-11 | 6.27E-10 | 4413  | 10554 | 9086  | 603  | 584 | 315 |
| Solyc05g013380.2.1  | 3.161848 | 6.675891 | 0.000105 | 0.000947 | 20233 | 6321  | 3742  | 1505 | 405 | 301 |
| Solyc05g013150.2.1  | 3.163115 | 1.640933 | 4.03E-07 | 7.41E-06 | 197   | 602   | 357   | 20   | 30  | 19  |
| Solyc11g069990.1.1  | 3.168575 | 2.203669 | 5.17E-06 | 6.90E-05 | 233   | 946   | 573   | 12   | 82  | 20  |
| Solyc01g007130.2.1  | 3.175113 | 2.68451  | 2.01E-05 | 0.000225 | 206   | 1215  | 1021  | 10   | 89  | 49  |
| Solyc01g067460.1.1  | 3.176174 | 1.284808 | 3.10E-05 | 0.000329 | 313   | 283   | 200   | 31   | 16  | 6   |
| Solyc07g062040.2.1  | 3.182476 | 0.096557 | 0.000736 | 0.004905 | 99    | 175   | 94    | 1    | 22  | 3   |
| Solyc09g010220.2.1  | 3.184208 | 0.920476 | 9.37E-05 | 0.000855 | 276   | 167   | 146   | 21   | 17  | 4   |
| Solyc10g045240.1.1  | 3.185213 | 2.416877 | 5.94E-06 | 7.81E-05 | 388   | 860   | 674   | 63   | 55  | 6   |
| Solyc02g081600.2.1  | 3.186149 | 1.707044 | 0.001294 | 0.007889 | 102   | 677   | 476   | 2    | 81  | 5   |
| Solyc03g119150.2.1  | 3.186495 | 3.77711  | 9.15E-06 | 0.000113 | 2426  | 1071  | 710   | 186  | 78  | 35  |
| Solyc05g005950.2.1  | 3.187918 | 4.815294 | 7.40E-06 | 9.43E-05 | 2460  | 4990  | 2822  | 467  | 95  | 41  |
| Solyc12g088840.1.1  | 3.192087 | 4.880487 | 5.32E-15 | 4.58E-13 | 2440  | 4871  | 3344  | 227  | 253 | 166 |
| Solyc01g090330.1.1  | 3.192573 | 2.313475 | 0.00014  | 0.001204 | 49    | 996   | 887   | 19   | 46  | 41  |
| Solyc01g097000.2.1  | 3.193502 | 0.75758  | 7.34E-05 | 0.000696 | 102   | 235   | 251   | 20   | 6   | 8   |
| Solyc09g015080.2.1  | 3.195983 | 1.677711 | 1.95E-06 | 2.96E-05 | 154   | 460   | 529   | 19   | 27  | 22  |
| Solyc08g082660.2.1  | 3.197371 | 1.317313 | 0.000491 | 0.003472 | 494   | 114   | 104   | 29   | 13  | 10  |
| Solyc06g008030.2.1  | 3.199547 | 6.007559 | 3.05E-10 | 1.18E-08 | 8521  | 8343  | 4842  | 617  | 507 | 286 |
| Solyc01g005870.1.1  | 3.200158 | 5.541988 | 6.04E-10 | 2.16E-08 | 4520  | 5757  | 5732  | 162  | 750 | 216 |
| Solyc09g014520.2.1  | 3.202628 | 7.748634 | 0.001078 | 0.006748 | 48880 | 5961  | 4931  | 3280 | 777 | 483 |
| Solyc04g009420.2.1  | 3.211271 | 0.767962 | 1.84E-05 | 0.000209 | 117   | 296   | 199   | 11   | 24  | 4   |
| Solyc06g054240.2.1  | 3.211702 | 0.116009 | 0.000276 | 0.002141 | 60    | 164   | 154   | 10   | 13  | 1   |
| Solyc12g042100.1.1  | 3.21354  | -0.97653 | 0.001348 | 0.008177 | 61    | 69    | 29    | 5    | 4   | 1   |
| Solyc07g007150.1.1  | 3.213803 | 2.892045 | 5.35E-10 | 1.93E-08 | 789   | 1028  | 745   | 50   | 66  | 44  |
| Solyc11g069270.1.1  | 3.214677 | 5.076497 | 5.82E-14 | 4.30E-12 | 2720  | 5079  | 4261  | 270  | 227 | 211 |
| Solyc05g053190.2.1  | 3.217453 | 2.104471 | 1.39E-06 | 2.21E-05 | 161   | 850   | 629   | 20   | 60  | 19  |
| Solyc10g008740.2.1  | 3.217894 | 5.63952  | 2.80E-10 | 1.09E-08 | 5221  | 6123  | 5697  | 558  | 277 | 214 |
| Solyc11g065320.1.1  | 3.218637 | 4.185434 | 5.80E-10 | 2.08E-08 | 744   | 3200  | 2894  | 93   | 227 | 94  |
| Solyc11g073020.1.1  | 3.218943 | 3.884526 | 6.19E-09 | 1.79E-07 | 2179  | 1708  | 962   | 139  | 140 | 50  |
| Solyc06g083040.2.1  | 3.219331 | 6.152717 | 1.81E-09 | 5.79E-08 | 4824  | 7803  | 11994 | 714  | 605 | 250 |
| Solyc03g115200.2.1  | 3.220288 | 2.358999 | 0.00069  | 0.004637 | 68    | 755   | 1072  | 4    | 52  | 51  |
| Solyc01g091530.2.1  | 3.220332 | 2.618021 | 2.41E-07 | 4.72E-06 | 402   | 742   | 992   | 46   | 28  | 48  |
| Solyc02g079980.2.1  | 3.224798 | 2.259078 | 0.000138 | 0.001191 | 827   | 280   | 327   | 69   | 16  | 13  |
| Solyc08g045780.2.1  | 3.227198 | 2.46407  | 2.47E-08 | 6.21E-07 | 358   | 929   | 728   | 25   | 52  | 40  |
| Solyc03g093330.2.1  | 3.228109 | 0.630225 | 4.43E-05 | 0.000449 | 71    | 200   | 267   | 8    | 14  | 10  |
| Solyc01g010970.2.1  | 3.228227 | 0.268863 | 0.001442 | 0.008662 | 49    | 241   | 157   | 0    | 20  | 7   |
| Solyc03g078150.2.1  | 3.22903  | 2.500176 | 0.000309 | 0.002354 | 47    | 1951  | 505   | 20   | 37  | 55  |
| Solyc09g083290.2.1  | 3.231808 | 4.179045 | 1.01E-10 | 4.28E-09 | 1619  | 3479  | 1613  | 111  | 268 | 51  |
| Solyc06g036390.1.1  | 3.238216 | 1.601947 | 0.001413 | 0.008505 | 644   | 119   | 93    | 44   | 14  | 5   |
| Solyc09g063130.2.1  | 3.239466 | 7.405717 | 0.000212 | 0.001713 | 31026 | 10582 | 9576  | 2768 | 464 | 260 |
| Solyc01g094020.2.1  | 3.247262 | 3.394021 | 8.76E-05 | 0.000807 | 2072  | 493   | 502   | 141  | 62  | 20  |
| Solyc02g070540.2.1  | 3.251683 | 3.158429 | 3.62E-06 | 5.04E-05 | 206   | 1432  | 1702  | 27   | 106 | 61  |
| Solyc07g006870.2.1  | 3.255465 | 2.053392 | 1.11E-06 | 1.81E-05 | 139   | 937   | 555   | 32   | 40  | 17  |
| Solyc05g005480.2.1  | 3.256713 | 4.60891  | 1.10E-13 | 7.77E-12 | 2193  | 4645  | 2200  | 215  | 182 | 115 |
| Solyc09g091880.2.1  | 3.257853 | 1.118398 | 0.000228 | 0.001818 | 31    | 508   | 321   | 7    | 20  | 17  |
| Solyc03g114450.2.1  | 3.258064 | 4.913965 | 4.61E-11 | 2.09E-09 | 1179  | 6615  | 4062  | 231  | 278 | 139 |
| Solyc10g076790.1.1  | 3.25841  | 1.198738 | 0.00112  | 0.00699  | 268   | 293   | 207   | 0    | 15  | 28  |
| Solyc02g090430.2.1  | 3.258489 | 6.142085 | 3.81E-05 | 0.000395 | 11779 | 4677  | 5254  | 1023 | 400 | 80  |
| Solyc09g007380.2.1  | 3.259395 | -0.72221 | 0.000666 | 0.004507 | 76    | 55    | 52    | 4    | 6   | 2   |
| Solyc05g010710.1.1  | 3.262012 | 1.016166 | 2.07E-05 | 0.00023  | 192   | 244   | 245   | 4    | 28  | 12  |
| Solyc11g042640.1.1  | 3.264628 | 5.030541 | 3.86E-07 | 7.13E-06 | 5449  | 2633  | 2132  | 403  | 166 | 103 |
| Solyc11g010690.1.1  | 3.269843 | 3.510424 | 3.46E-11 | 1.61E-09 | 640   | 2170  | 1497  | 76   | 118 | 52  |
| Solyc04g008060.2.1  | 3.276849 | 1.795351 | 7.51E-06 | 9.54E-05 | 237   | 542   | 468   | 5    | 44  | 25  |
| Solyc03g118630.2.1  | 3.278501 | -0.07498 | 0.00034  | 0.002556 | 84    | 142   | 96    | 1    | 8   | 9   |
| Solyc02g080600.1.1  | 3.287526 | 2.170363 | 5.61E-08 | 1.28E-06 | 532   | 657   | 364   | 25   | 34  | 31  |
| Solyc07g018140.2.1  | 3.288072 | 1.955634 | 4.10E-05 | 0.00042  | 562   | 422   | 276   | 54   | 12  | 10  |
| Solyc06g053140.2.1  | 3.288824 | 4.230278 | 1.67E-10 | 6.71E-09 | 2117  | 2243  | 2016  | 193  | 149 | 54  |
| Solyc06g071320.2.1  | 3.292116 | -0.20246 | 0.000158 | 0.001327 | 68    | 180   | 65    | 7    | 4   | 5   |
| Solyc06g073090.2.1  | 3.292147 | 7.438991 | 0.000565 | 0.003905 | 36915 | 7943  | 5427  | 2710 | 420 | 305 |
| Solyc06g051200.2.1  | 3.296708 | 4.259642 | 1.25E-12 | 7.53E-11 | 1755  | 2949  | 2143  | 174  | 168 | 63  |
| Solyc04g077780.2.1  | 3.29739  | 6.511209 | 5.53E-07 | 9.82E-06 | 15129 | 8249  | 5563  | 1080 | 533 | 255 |
| Solyc05g009170.1.1  | 3.298216 | 1.244913 | 0.001305 | 0.007946 | 60    | 569   | 313   | 0    | 35  | 16  |
| Solyc07g042190.2.1  | 3.302077 | 5.75809  | 9.50E-07 | 1.58E-05 | 1296  | 10398 | 9315  | 131  | 771 | 300 |
| Solyc02g092220.1.1  | 3.303841 | 0.118631 | 0.001136 | 0.007076 | 54    | 176   | 156   | 0    | 17  | 6   |
| Solyc03g006360.2.1  | 3.308309 | 2.913534 | 2.54E-05 | 0.000276 | 260   | 2738  | 360   | 66   | 90  | 11  |
| Solyc05g009470.2.1  | 3.3087   | 5.492813 | 2.77E-13 | 1.86E-11 | 4336  | 5676  | 5612  | 288  | 526 | 167 |
| Solyc09g074630.2.1  | 3.312534 | -0.24917 | 0.000201 | 0.001632 | 38    | 116   | 135   | 7    | 6   | 3   |
| Solyc11g009020.1.1  | 3.31303  | 2.44237  | 0.000131 | 0.001139 | 968   | 358   | 322   | 78   | 22  | 8   |

|                    |          |          |          |          |       |       |      |      |     |     |
|--------------------|----------|----------|----------|----------|-------|-------|------|------|-----|-----|
| Solyc11g009060.1.1 | 3.313046 | 3.870581 | 5.44E-07 | 9.68E-06 | 2737  | 1150  | 609  | 128  | 109 | 61  |
| Solyc11g007850.1.1 | 3.315115 | 4.613192 | 3.80E-07 | 7.05E-06 | 845   | 6075  | 3013 | 40   | 310 | 170 |
| Solyc08g005560.2.1 | 3.317237 | 4.34774  | 3.14E-13 | 2.08E-11 | 1983  | 3463  | 1932 | 185  | 148 | 81  |
| Solyc08g067970.2.1 | 3.317431 | 1.05589  | 8.02E-05 | 0.000749 | 57    | 323   | 380  | 10   | 10  | 18  |
| Solyc08g078840.2.1 | 3.317859 | 0.03548  | 6.63E-05 | 0.000636 | 70    | 170   | 121  | 7    | 12  | 2   |
| Solyc08g080780.2.1 | 3.318849 | 3.400184 | 9.95E-08 | 2.13E-06 | 1234  | 1148  | 1152 | 130  | 57  | 25  |
| Solyc09g091060.2.1 | 3.31912  | 0.128688 | 0.000349 | 0.002611 | 27    | 201   | 175  | 4    | 7   | 9   |
| Solyc02g067120.2.1 | 3.325626 | 3.043171 | 2.31E-10 | 9.08E-09 | 634   | 1671  | 810  | 68   | 57  | 39  |
| Solyc03g083100.2.1 | 3.329167 | 4.463819 | 4.65E-15 | 4.04E-13 | 2096  | 3104  | 2580 | 159  | 178 | 109 |
| Solyc04g064720.2.1 | 3.332063 | 3.739147 | 6.96E-11 | 3.03E-09 | 741   | 2203  | 2001 | 117  | 86  | 61  |
| Solyc07g064160.2.1 | 3.333022 | 5.450157 | 1.50E-09 | 4.87E-08 | 2807  | 12422 | 2805 | 444  | 299 | 141 |
| Solyc02g076980.2.1 | 3.335818 | 2.69734  | 2.06E-05 | 0.00023  | 591   | 1529  | 386  | 12   | 132 | 12  |
| Solyc09g097780.2.1 | 3.339629 | 5.951618 | 2.81E-10 | 1.09E-08 | 5945  | 12254 | 4939 | 645  | 445 | 170 |
| Solyc09g082760.2.1 | 3.344714 | 5.451984 | 4.22E-11 | 1.94E-09 | 2595  | 5467  | 7525 | 173  | 418 | 289 |
| Solyc08g083130.2.1 | 3.344742 | 1.504028 | 2.69E-05 | 0.00029  | 133   | 902   | 164  | 25   | 29  | 5   |
| Solyc12g040790.1.1 | 3.346787 | 1.883087 | 0.000117 | 0.001035 | 52    | 890   | 550  | 8    | 58  | 15  |
| Solyc04g077510.2.1 | 3.349615 | 2.664569 | 0.001112 | 0.006946 | 89    | 1023  | 1283 | 1    | 85  | 46  |
| Solyc03g013240.2.1 | 3.350707 | 2.007935 | 1.31E-06 | 2.10E-05 | 461   | 624   | 324  | 38   | 40  | 6   |
| Solyc01g067290.2.1 | 3.353989 | 2.528445 | 9.43E-09 | 2.63E-07 | 463   | 745   | 812  | 50   | 34  | 27  |
| Solyc07g063230.2.1 | 3.354234 | 3.539045 | 5.35E-09 | 1.57E-07 | 769   | 2011  | 1533 | 26   | 157 | 64  |
| Solyc03g120640.2.1 | 3.355311 | 6.772407 | 0.000161 | 0.001351 | 20909 | 6436  | 5553 | 1654 | 262 | 169 |
| Solyc06g072700.2.1 | 3.356742 | 1.108221 | 0.00016  | 0.001345 | 193   | 408   | 185  | 32   | 5   | 3   |
| Solyc07g061800.2.1 | 3.358378 | -0.4171  | 0.000541 | 0.003768 | 70    | 170   | 31   | 6    | 3   | 4   |
| Solyc06g076220.2.1 | 3.358899 | 1.672261 | 1.95E-06 | 2.96E-05 | 121   | 481   | 563  | 17   | 24  | 20  |
| Solyc03g033610.1.1 | 3.360554 | -0.03348 | 0.000921 | 0.005932 | 88    | 135   | 107  | 0    | 18  | 3   |
| Solyc09g031750.2.1 | 3.361233 | 4.995668 | 2.69E-15 | 2.44E-13 | 2697  | 5923  | 3259 | 220  | 327 | 115 |
| Solyc02g080510.1.1 | 3.362182 | 4.691063 | 2.82E-05 | 0.000302 | 278   | 6561  | 3872 | 47   | 404 | 119 |
| Solyc08g076820.2.1 | 3.36501  | -0.70416 | 0.00158  | 0.009337 | 83    | 71    | 36   | 2    | 2   | 6   |
| Solyc01g100530.2.1 | 3.366108 | 2.079751 | 4.30E-08 | 1.01E-06 | 254   | 754   | 564  | 35   | 32  | 16  |
| Solyc09g074850.2.1 | 3.366689 | -0.05835 | 0.000859 | 0.005586 | 116   | 73    | 107  | 13   | 2   | 2   |
| Solyc11g068680.1.1 | 3.367378 | 1.510614 | 1.07E-05 | 0.000129 | 244   | 377   | 368  | 4    | 23  | 26  |
| Solyc02g071210.2.1 | 3.367867 | 6.008803 | 4.62E-11 | 2.09E-09 | 2709  | 14631 | 8287 | 381  | 654 | 285 |
| Solyc10g009270.2.1 | 3.370574 | 2.392516 | 3.77E-06 | 5.23E-05 | 126   | 1169  | 792  | 22   | 74  | 17  |
| Solyc01g109040.2.1 | 3.370651 | 3.557104 | 0.001333 | 0.008095 | 2644  | 345   | 324  | 182  | 24  | 15  |
| Solyc07g062550.2.1 | 3.371966 | -0.06675 | 8.78E-05 | 0.000808 | 81    | 155   | 95   | 2    | 10  | 6   |
| Solyc02g077910.2.1 | 3.372543 | 1.073398 | 1.41E-05 | 0.000164 | 110   | 406   | 273  | 4    | 28  | 11  |
| Solyc10g083440.1.1 | 3.377003 | 1.320642 | 0.000759 | 0.005034 | 30    | 799   | 248  | 2    | 39  | 12  |
| Solyc01g086920.2.1 | 3.379381 | 2.514718 | 1.04E-06 | 1.71E-05 | 741   | 574   | 563  | 67   | 30  | 13  |
| Solyc02g084640.2.1 | 3.380213 | 2.879556 | 8.04E-06 | 0.000101 | 130   | 1877  | 1024 | 20   | 105 | 32  |
| Solyc02g091140.2.1 | 3.384714 | 3.710026 | 1.04E-05 | 0.000126 | 128   | 2745  | 2342 | 44   | 130 | 84  |
| Solyc11g007540.1.1 | 3.386357 | 0.883934 | 0.000208 | 0.001686 | 341   | 124   | 86   | 16   | 18  | 3   |
| Solyc01g111310.2.1 | 3.390152 | 1.66361  | 0.000122 | 0.001071 | 168   | 463   | 513  | 1    | 47  | 18  |
| Solyc02g091990.2.1 | 3.396737 | 1.580031 | 2.38E-07 | 4.66E-06 | 227   | 469   | 379  | 18   | 35  | 8   |
| Solyc05g009330.2.1 | 3.397832 | 1.786892 | 6.54E-06 | 8.48E-05 | 85    | 606   | 616  | 15   | 28  | 22  |
| Solyc10g009320.2.1 | 3.400766 | -0.57394 | 0.001594 | 0.009402 | 87    | 97    | 34   | 0    | 10  | 3   |
| Solyc07g062530.2.1 | 3.402506 | -0.20713 | 0.000126 | 0.001101 | 36    | 196   | 95   | 5    | 8   | 3   |
| Solyc11g007160.1.1 | 3.403213 | 0.94151  | 0.000343 | 0.002578 | 118   | 330   | 253  | 0    | 28  | 11  |
| Solyc02g089880.2.1 | 3.404206 | -0.20251 | 0.000136 | 0.001173 | 81    | 137   | 79   | 9    | 3   | 3   |
| Solyc12g099650.1.1 | 3.406    | 5.642509 | 0.001616 | 0.009502 | 11482 | 1291  | 1241 | 775  | 94  | 52  |
| Solyc07g061790.2.1 | 3.406128 | 4.55525  | 8.16E-10 | 2.84E-08 | 964   | 4891  | 3349 | 232  | 124 | 86  |
| Solyc01g049880.2.1 | 3.409926 | 2.965359 | 9.35E-10 | 3.19E-08 | 902   | 950   | 812  | 61   | 71  | 23  |
| Solyc01g096370.2.1 | 3.414775 | 3.772257 | 1.13E-09 | 3.78E-08 | 446   | 2966  | 2004 | 67   | 140 | 64  |
| Solyc10g054840.1.1 | 3.417673 | 3.388434 | 0.000328 | 0.002488 | 2121  | 617   | 385  | 154  | 30  | 10  |
| Solyc11g020960.1.1 | 3.418081 | 1.883033 | 0.000168 | 0.001402 | 45    | 471   | 832  | 13   | 57  | 9   |
| Solyc04g057980.2.1 | 3.42163  | 1.456972 | 7.25E-05 | 0.000688 | 482   | 205   | 154  | 31   | 9   | 9   |
| Solyc01g090560.2.1 | 3.42183  | 2.664241 | 2.01E-06 | 3.03E-05 | 138   | 1124  | 1167 | 27   | 80  | 23  |
| Solyc03g120520.1.1 | 3.422081 | 0.099699 | 0.000384 | 0.002827 | 22    | 245   | 148  | 2    | 12  | 6   |
| Solyc03g119930.1.1 | 3.425582 | 4.615237 | 1.09E-07 | 2.31E-06 | 2908  | 2905  | 2542 | 275  | 184 | 26  |
| Solyc02g070220.2.1 | 3.42576  | 1.270139 | 1.95E-05 | 0.000219 | 112   | 409   | 370  | 6    | 12  | 23  |
| Solyc09g008320.2.1 | 3.426746 | 1.335037 | 5.40E-06 | 7.17E-05 | 240   | 342   | 293  | 25   | 21  | 3   |
| Solyc03g026210.2.1 | 3.429537 | 2.731658 | 4.83E-10 | 1.76E-08 | 534   | 984   | 865  | 45   | 39  | 37  |
| Solyc09g008860.2.1 | 3.430234 | -0.04254 | 0.000411 | 0.002997 | 48    | 103   | 175  | 9    | 2   | 5   |
| Solyc11g007900.1.1 | 3.432734 | 5.16383  | 1.51E-12 | 8.97E-11 | 2327  | 5937  | 5043 | 119  | 426 | 176 |
| Solyc05g024160.2.1 | 3.433951 | 1.228507 | 0.000648 | 0.004407 | 71    | 531   | 321  | 0    | 26  | 18  |
| Solyc04g015750.2.1 | 3.435978 | 5.508019 | 1.54E-05 | 0.000178 | 8039  | 4476  | 2055 | 600  | 208 | 50  |
| Solyc01g096220.2.1 | 3.436339 | 0.114422 | 0.001254 | 0.00768  | 43    | 172   | 173  | 0    | 7   | 11  |
| Solyc06g084250.2.1 | 3.438451 | 1.964529 | 3.12E-08 | 7.61E-07 | 217   | 832   | 459  | 22   | 29  | 21  |
| Solyc07g056250.2.1 | 3.440622 | 0.508193 | 8.18E-05 | 0.000762 | 57    | 343   | 158  | 4    | 22  | 3   |
| Solyc07g006600.1.1 | 3.446673 | -0.03415 | 6.47E-05 | 0.000623 | 67    | 177   | 106  | 2    | 8   | 7   |
| Solyc04g082050.2.1 | 3.450023 | 2.567908 | 6.41E-06 | 8.33E-05 | 399   | 1248  | 634  | 4    | 84  | 32  |
| Solyc09g065910.1.1 | 3.455369 | 6.055583 | 3.01E-06 | 4.29E-05 | 11529 | 5182  | 4175 | 821  | 265 | 130 |
| Solyc03g098060.1.1 | 3.457635 | 0.747173 | 9.16E-06 | 0.000113 | 116   | 343   | 170  | 4    | 23  | 6   |
| Solyc12g008900.1.1 | 3.460776 | 4.048253 | 1.19E-05 | 0.000142 | 1560  | 1916  | 2249 | 231  | 64  | 10  |
| Solyc12g049510.1.1 | 3.464037 | 2.188583 | 2.93E-07 | 5.57E-06 | 317   | 698   | 637  | 31   | 13  | 32  |
| Solyc01g066640.2.1 | 3.470488 | -0.44674 | 0.000111 | 0.000991 | 81    | 99    | 61   | 4    | 7   | 2   |
| Solyc09g091050.2.1 | 3.479797 | 4.394301 | 6.77E-15 | 5.76E-13 | 1415  | 3558  | 2860 | 123  | 202 | 78  |
| Solyc02g078040.2.1 | 3.480157 | 1.585397 | 0.000147 | 0.001254 | 42    | 410   | 652  | 7    | 19  | 25  |
| Solyc04g082000.2.1 | 3.480295 | 4.580704 | 0.001031 | 0.006505 | 5778  | 438   | 392  | 310  | 66  | 46  |
| Solyc03g112390.2.1 | 3.480993 | -0.54416 | 0.001069 | 0.006697 | 51    | 84    | 92   | 0    | 11  | 2   |
| Solyc02g071700.2.1 | 3.485379 | 4.340884 | 6.64E-10 | 2.34E-08 | 704   | 3620  | 3453 | 104  | 234 | 63  |
| Solyc04g005250.2.1 | 3.485856 | 2.284973 | 9.13E-07 | 1.52E-05 | 154   | 1358  | 524  | 18   | 61  | 17  |
| Solyc06g050900.2.1 | 3.486637 | 0.964084 | 0.00115  | 0.007146 | 123   | 391   | 221  | 0    | 41  | 2   |
| Solyc12g014030.1.1 | 3.486902 | 0.154596 | 3.96E-05 | 0.000409 | 108   | 102   | 150  | 9    | 6   | 4   |
| Solyc12g007070.1.1 | 3.491798 | 3.577189 | 1.72E-12 | 1.01E-10 | 1064  | 1828  | 1416 | 98   | 70  | 46  |

|                     |          |          |          |          |       |       |       |      |      |     |
|---------------------|----------|----------|----------|----------|-------|-------|-------|------|------|-----|
| Solyc08g083320.2.1  | 3.49229  | 7.551895 | 3.43E-10 | 1.30E-08 | 13098 | 44943 | 16716 | 1770 | 1098 | 548 |
| Solyc07g056140.2.1  | 3.493166 | 5.976972 | 1.25E-06 | 2.01E-05 | 7693  | 9608  | 5001  | 831  | 206  | 84  |
| Solyc10g079750.1.1  | 3.497637 | 0.65605  | 0.000121 | 0.001064 | 58    | 226   | 284   | 12   | 17   | 1   |
| Solyc08g083320.1.1  | 3.500458 | 2.592509 | 5.04E-09 | 1.49E-07 | 272   | 1198  | 862   | 34   | 57   | 22  |
| Solyc09g083150.2.1  | 3.502323 | 4.57146  | 5.30E-06 | 7.05E-05 | 3769  | 2073  | 1799  | 312  | 48   | 48  |
| Solyc08g006690.1.1  | 3.505787 | 2.802049 | 4.71E-07 | 8.50E-06 | 1028  | 668   | 576   | 54   | 73   | 9   |
| Solyc02g093420.2.1  | 3.51063  | 1.03731  | 6.03E-05 | 0.000588 | 314   | 209   | 136   | 2    | 19   | 15  |
| Solyc10g084150.1.1  | 3.510913 | 1.89921  | 1.16E-05 | 0.000138 | 155   | 715   | 560   | 4    | 55   | 15  |
| Solyc10g009290.1.1  | 3.510981 | 4.526061 | 4.24E-09 | 1.27E-07 | 653   | 3943  | 4231  | 79   | 242  | 113 |
| Solyc05g013560.2.1  | 3.511088 | 3.601062 | 1.84E-08 | 4.77E-07 | 1841  | 1102  | 987   | 118  | 72   | 29  |
| Solyc06g083070.2.1  | 3.513377 | 3.869806 | 1.23E-06 | 1.98E-05 | 2546  | 1075  | 948   | 147  | 107  | 19  |
| Solyc06g065670.2.1  | 3.514973 | 2.584978 | 2.28E-08 | 5.79E-07 | 838   | 713   | 462   | 50   | 30   | 24  |
| Solyc04g054370.1.1  | 3.518848 | 1.745479 | 3.62E-08 | 8.66E-07 | 281   | 497   | 419   | 23   | 17   | 17  |
| Solyc02g064770.2.1  | 3.521236 | 5.148543 | 1.62E-16 | 1.73E-14 | 2983  | 7168  | 3381  | 210  | 321  | 129 |
| Solyc07g018240.1.1  | 3.522543 | 1.518638 | 0.000345 | 0.002587 | 382   | 261   | 286   | 42   | 4    | 2   |
| Solyc05g010240.2.1  | 3.522638 | 2.497269 | 1.95E-06 | 2.96E-05 | 919   | 396   | 450   | 47   | 50   | 9   |
| Solyc07g0066300.2.1 | 3.526299 | 2.865007 | 1.41E-07 | 2.90E-06 | 499   | 1591  | 746   | 10   | 97   | 34  |
| Solyc05g025600.1.1  | 3.526481 | 4.854068 | 2.37E-06 | 3.49E-05 | 5091  | 2225  | 1766  | 350  | 85   | 61  |
| Solyc09g009190.2.1  | 3.527261 | 5.409191 | 2.88E-14 | 2.25E-12 | 2635  | 7701  | 5786  | 159  | 423  | 206 |
| Solyc06g006080.2.1  | 3.5308   | 6.05519  | 2.80E-14 | 2.21E-12 | 5577  | 9248  | 9050  | 303  | 509  | 366 |
| Solyc08g075490.2.1  | 3.530959 | 4.515222 | 1.06E-11 | 5.49E-10 | 2758  | 3601  | 1792  | 210  | 130  | 65  |
| Solyc10g008520.2.1  | 3.537919 | 6.605004 | 7.29E-11 | 3.16E-09 | 9189  | 13639 | 11936 | 884  | 667  | 216 |
| Solyc03g115900.2.1  | 3.53852  | 4.431198 | 0.000226 | 0.001805 | 4883  | 609   | 643   | 263  | 90   | 26  |
| Solyc05g008950.2.1  | 3.53948  | 2.85851  | 1.05E-05 | 0.000127 | 314   | 1736  | 873   | 4    | 100  | 36  |
| Solyc05g005980.2.1  | 3.541151 | 1.950804 | 1.77E-06 | 2.73E-05 | 255   | 861   | 389   | 43   | 18   | 6   |
| Solyc06g062460.2.1  | 3.543936 | 3.565464 | 1.31E-10 | 5.37E-09 | 456   | 2426  | 1768  | 64   | 107  | 45  |
| Solyc11g072120.1.1  | 3.544542 | 1.487915 | 5.31E-07 | 9.48E-06 | 112   | 659   | 345   | 13   | 20   | 15  |
| Solyc12g055840.1.1  | 3.551023 | 4.468355 | 8.80E-14 | 6.39E-12 | 2995  | 2561  | 1929  | 122  | 183  | 92  |
| Solyc09g074840.2.1  | 3.551677 | 0.283259 | 0.00036  | 0.002677 | 43    | 276   | 153   | 10   | 12   | 0   |
| Solyc11g012130.1.1  | 3.552873 | 2.745131 | 3.75E-06 | 5.21E-05 | 98    | 1911  | 849   | 53   | 45   | 20  |
| Solyc07g044860.2.1  | 3.553004 | 8.421067 | 0.000326 | 0.002474 | 69841 | 16943 | 15480 | 4841 | 620  | 312 |
| Solyc01g080910.2.1  | 3.56357  | 4.728182 | 4.14E-14 | 3.14E-12 | 1529  | 4117  | 4199  | 147  | 244  | 92  |
| Solyc12g038160.1.1  | 3.563819 | 2.325907 | 3.98E-07 | 7.31E-06 | 148   | 1123  | 734   | 15   | 48   | 26  |
| Solyc07g006570.2.1  | 3.564864 | 5.955842 | 1.60E-10 | 6.49E-09 | 2212  | 10080 | 11274 | 392  | 410  | 272 |
| Solyc06g074090.2.1  | 3.564994 | 3.524862 | 7.56E-05 | 0.000711 | 54    | 3780  | 1298  | 27   | 117  | 63  |
| Solyc01g096320.2.1  | 3.569408 | 3.255776 | 0.000394 | 0.002892 | 88    | 4249  | 312   | 37   | 146  | 11  |
| Solyc03g114160.1.1  | 3.57185  | 1.782945 | 7.82E-05 | 0.000732 | 82    | 1213  | 240   | 6    | 54   | 8   |
| Solyc12g088320.1.1  | 3.577766 | 0.850567 | 6.38E-06 | 8.30E-05 | 264   | 163   | 148   | 12   | 14   | 5   |
| Solyc09g048980.2.1  | 3.583148 | -0.40691 | 0.000121 | 0.001066 | 39    | 99    | 120   | 2    | 6    | 4   |
| Solyc02g055440.2.1  | 3.583885 | 3.413294 | 8.76E-06 | 0.000109 | 1766  | 958   | 699   | 132  | 35   | 12  |
| Solyc09g075360.2.1  | 3.585657 | 2.206092 | 1.35E-05 | 0.000158 | 543   | 642   | 423   | 59   | 12   | 5   |
| Solyc03g031840.2.1  | 3.590919 | 3.163463 | 3.95E-10 | 1.47E-08 | 478   | 1832  | 1178  | 26   | 74   | 53  |
| Solyc01g109370.2.1  | 3.594628 | 1.318203 | 6.09E-06 | 7.97E-05 | 103   | 486   | 367   | 24   | 14   | 4   |
| Solyc09g008380.2.1  | 3.594785 | 0.572441 | 0.001435 | 0.008625 | 45    | 99    | 354   | 1    | 4    | 16  |
| Solyc05g007510.2.1  | 3.594795 | 6.083453 | 4.29E-14 | 3.25E-12 | 4582  | 13901 | 7832  | 272  | 660  | 284 |
| Solyc06g054570.1.1  | 3.599559 | 1.744772 | 0.000127 | 0.001111 | 566   | 395   | 137   | 42   | 5    | 6   |
| Solyc03g123410.1.1  | 3.59973  | 0.912825 | 1.17E-05 | 0.00014  | 270   | 170   | 163   | 16   | 13   | 3   |
| Solyc10g005690.2.1  | 3.599799 | 0.454972 | 0.00018  | 0.001485 | 152   | 166   | 142   | 0    | 17   | 7   |
| Solyc04g072310.2.1  | 3.600935 | 1.292384 | 2.65E-07 | 5.11E-06 | 176   | 485   | 264   | 9    | 28   | 7   |
| Solyc10g078610.1.1  | 3.601985 | -0.97797 | 0.000973 | 0.006191 | 80    | 39    | 29    | 1    | 5    | 2   |
| Solyc06g073540.2.1  | 3.604393 | 5.183945 | 6.25E-11 | 2.74E-09 | 4566  | 5647  | 2730  | 347  | 161  | 97  |
| Solyc02g069460.2.1  | 3.607008 | 6.800041 | 9.87E-06 | 0.000121 | 19637 | 7427  | 7711  | 1357 | 270  | 187 |
| Solyc05g024260.2.1  | 3.609226 | 5.034914 | 2.11E-06 | 3.16E-05 | 1419  | 11088 | 1989  | 390  | 92   | 54  |
| Solyc12g006520.1.1  | 3.618637 | 2.323643 | 1.25E-06 | 2.01E-05 | 150   | 1311  | 614   | 10   | 59   | 21  |
| Solyc01g106910.2.1  | 3.620282 | 3.983803 | 6.16E-14 | 4.54E-12 | 1285  | 3331  | 1498  | 81   | 161  | 43  |
| Solyc07g049440.2.1  | 3.622841 | 3.133952 | 6.62E-10 | 2.34E-08 | 783   | 2226  | 495   | 58   | 70   | 24  |
| Solyc02g083810.2.1  | 3.631081 | 7.31999  | 1.18E-07 | 2.47E-06 | 27716 | 12210 | 10684 | 1506 | 729  | 397 |
| Solyc03g062660.2.1  | 3.637323 | 0.102922 | 7.30E-05 | 0.000693 | 42    | 171   | 176   | 2    | 9    | 6   |
| Solyc04g071650.2.1  | 3.641633 | 5.589257 | 1.70E-11 | 8.46E-10 | 1624  | 10220 | 7389  | 206  | 419  | 201 |
| Solyc02g069110.2.1  | 3.644242 | 4.186942 | 3.70E-08 | 8.83E-07 | 461   | 2293  | 3977  | 54   | 180  | 82  |
| Solyc04g005380.2.1  | 3.650058 | 1.224048 | 6.40E-06 | 8.32E-05 | 101   | 767   | 139   | 17   | 15   | 6   |
| Solyc11g008530.1.1  | 3.652042 | 4.848195 | 1.91E-09 | 6.12E-08 | 5174  | 2748  | 1354  | 150  | 151  | 154 |
| Solyc01g105680.2.1  | 3.652659 | 4.412239 | 4.67E-16 | 4.61E-14 | 1779  | 3910  | 2337  | 95   | 212  | 67  |
| Solyc08g065970.2.1  | 3.655887 | 3.448728 | 8.81E-14 | 6.39E-12 | 1068  | 1645  | 1227  | 56   | 96   | 35  |
| Solyc10g054900.1.1  | 3.664818 | -0.79449 | 0.001207 | 0.007439 | 12    | 103   | 92    | 1    | 3    | 4   |
| Solyc08g069230.2.1  | 3.667972 | -0.06464 | 0.001454 | 0.008719 | 154   | 48    | 80    | 8    | 0    | 5   |
| Solyc10g055770.1.1  | 3.67351  | 1.51152  | 1.94E-07 | 3.87E-06 | 140   | 571   | 388   | 10   | 17   | 17  |
| Solyc02g005180.2.1  | 3.679412 | 2.257816 | 4.32E-08 | 1.01E-06 | 505   | 782   | 445   | 28   | 50   | 6   |
| Solyc01g009080.2.1  | 3.681257 | 2.516205 | 4.04E-05 | 0.000416 | 1185  | 309   | 216   | 58   | 24   | 9   |
| Solyc07g019650.2.1  | 3.681615 | 3.076983 | 1.27E-09 | 4.17E-08 | 426   | 1736  | 1145  | 19   | 78   | 43  |
| Solyc01g094790.2.1  | 3.687658 | 5.413444 | 3.34E-07 | 6.26E-06 | 1573  | 9216  | 6297  | 35   | 497  | 209 |
| Solyc08g067330.1.1  | 3.689778 | 1.686749 | 0.000444 | 0.003201 | 752   | 54    | 87    | 18   | 13   | 17  |
| Solyc01g058320.2.1  | 3.691055 | 2.54578  | 9.77E-09 | 2.71E-07 | 420   | 1059  | 725   | 18   | 75   | 12  |
| Solyc12g008830.1.1  | 3.69433  | 1.402304 | 0.000101 | 0.000913 | 141   | 580   | 314   | 0    | 35   | 11  |
| Solyc07g065860.2.1  | 3.697834 | -0.1396  | 0.000609 | 0.004168 | 26    | 167   | 144   | 0    | 9    | 5   |
| Solyc03g044480.2.1  | 3.697972 | 2.497554 | 7.42E-11 | 3.21E-09 | 491   | 1099  | 547   | 34   | 39   | 18  |
| Solyc06g068440.2.1  | 3.698796 | 3.984888 | 3.48E-10 | 1.32E-08 | 461   | 3713  | 2298  | 53   | 128  | 76  |
| Solyc02g068760.2.1  | 3.701114 | 3.578812 | 1.75E-05 | 0.000199 | 2307  | 663   | 668   | 130  | 51   | 10  |
| Solyc12g098370.1.1  | 3.701514 | 2.37747  | 7.42E-07 | 1.27E-05 | 190   | 1106  | 766   | 8    | 65   | 18  |
| Solyc07g019430.1.1  | 3.710909 | 0.743082 | 1.20E-06 | 1.94E-05 | 198   | 246   | 137   | 8    | 15   | 4   |
| Solyc06g050840.2.1  | 3.71392  | 1.138555 | 0.000158 | 0.001327 | 149   | 386   | 283   | 0    | 35   | 5   |
| Solyc03g083050.2.1  | 3.720598 | -0.98354 | 0.000691 | 0.004646 | 44    | 93    | 37    | 5    | 2    | 0   |
| Solyc08g061980.2.1  | 3.725947 | 3.598146 | 0.000128 | 0.001114 | 209   | 2354  | 2246  | 2    | 125  | 71  |
| Solyc01g006690.2.1  | 3.727107 | 2.713965 | 8.77E-08 | 1.90E-06 | 705   | 1019  | 639   | 66   | 15   | 16  |

|                    |          |          |          |          |       |       |       |      |     |     |
|--------------------|----------|----------|----------|----------|-------|-------|-------|------|-----|-----|
| Solyc09g097890.2.1 | 3.732064 | -0.89663 | 0.000384 | 0.002829 | 44    | 70    | 63    | 3    | 5   | 0   |
| Solyc03g005900.2.1 | 3.733525 | 1.454006 | 1.65E-07 | 3.33E-06 | 392   | 294   | 221   | 15   | 17  | 10  |
| Solyc10g078770.1.1 | 3.736547 | 1.846932 | 2.79E-05 | 0.0003   | 191   | 1301  | 110   | 27   | 29  | 3   |
| Solyc04g016290.2.1 | 3.738842 | 1.616266 | 6.89E-08 | 1.54E-06 | 369   | 422   | 276   | 7    | 26  | 15  |
| Solyc11g012040.1.1 | 3.741064 | 0.622066 | 0.000255 | 0.002004 | 24    | 306   | 268   | 1    | 18  | 6   |
| Solyc09g075900.2.1 | 3.742363 | 1.129561 | 4.50E-07 | 8.15E-06 | 169   | 374   | 261   | 5    | 13  | 14  |
| Solyc02g071610.2.1 | 3.746251 | 3.380765 | 4.29E-11 | 1.97E-09 | 1497  | 1362  | 725   | 62   | 78  | 27  |
| Solyc07g052980.2.1 | 3.752437 | 4.809809 | 5.23E-17 | 5.90E-15 | 2321  | 3504  | 4204  | 129  | 184 | 120 |
| Solyc02g079950.2.1 | 3.760131 | 7.717123 | 0.000173 | 0.001435 | 43237 | 9346  | 10455 | 2600 | 281 | 199 |
| Solyc05g014560.2.1 | 3.761378 | -1.0978  | 0.000604 | 0.004139 | 51    | 49    | 45    | 4    | 1   | 1   |
| Solyc01g098640.2.1 | 3.763105 | 4.287354 | 1.15E-11 | 5.91E-10 | 2239  | 2607  | 2046  | 170  | 82  | 43  |
| Solyc07g041720.1.1 | 3.7771   | 2.115552 | 1.73E-06 | 2.67E-05 | 805   | 250   | 271   | 30   | 23  | 12  |
| Solyc01g005990.2.1 | 3.784606 | 2.139683 | 3.83E-07 | 7.08E-06 | 543   | 578   | 410   | 42   | 19  | 5   |
| Solyc09g059550.1.1 | 3.795095 | -0.90849 | 0.00052  | 0.003634 | 63    | 33    | 63    | 4    | 2   | 1   |
| Solyc02g030200.1.1 | 3.799002 | -0.42498 | 0.000253 | 0.001985 | 52    | 156   | 66    | 0    | 5   | 5   |
| Solyc10g006230.2.1 | 3.802613 | 7.563578 | 0.000555 | 0.003849 | 40225 | 6981  | 8751  | 2397 | 168 | 119 |
| Solyc07g007280.2.1 | 3.802664 | -0.04691 | 5.26E-05 | 0.000521 | 146   | 79    | 76    | 2    | 8   | 4   |
| Solyc02g068060.2.1 | 3.811522 | 2.239373 | 2.70E-10 | 1.05E-08 | 504   | 665   | 509   | 17   | 30  | 22  |
| Solyc02g070950.1.1 | 3.820842 | 2.248872 | 0.000507 | 0.003561 | 1137  | 136   | 76    | 47   | 12  | 8   |
| Solyc03g031760.2.1 | 3.826362 | 2.798551 | 2.51E-11 | 1.21E-09 | 542   | 1329  | 787   | 34   | 61  | 14  |
| Solyc10g007120.2.1 | 3.832585 | 2.217774 | 2.96E-10 | 1.15E-08 | 346   | 703   | 659   | 22   | 35  | 13  |
| Solyc02g083120.1.1 | 3.833179 | 2.328569 | 2.14E-09 | 6.76E-08 | 236   | 1087  | 673   | 15   | 37  | 22  |
| Solyc11g008040.1.1 | 3.834441 | -0.77244 | 0.000754 | 0.00501  | 44    | 58    | 87    | 5    | 0   | 2   |
| Solyc07g043660.2.1 | 3.8349   | 0.623606 | 0.000107 | 0.000954 | 40    | 334   | 232   | 1    | 7   | 12  |
| Solyc08g062370.2.1 | 3.843334 | -0.89048 | 0.000115 | 0.001017 | 38    | 89    | 59    | 3    | 3   | 1   |
| Solyc12g006460.1.1 | 3.849667 | 4.455414 | 1.35E-09 | 4.43E-08 | 506   | 6374  | 2625  | 60   | 163 | 100 |
| Solyc07g066150.1.1 | 3.850289 | 7.007177 | 0.000404 | 0.002948 | 28124 | 4509  | 5235  | 1550 | 173 | 67  |
| Solyc01g096360.2.1 | 3.858269 | 3.720019 | 1.71E-12 | 1.00E-10 | 750   | 2524  | 1850  | 30   | 116 | 53  |
| Solyc04g081810.2.1 | 3.85928  | 0.030002 | 0.00053  | 0.003706 | 182   | 92    | 42    | 0    | 11  | 4   |
| Solyc06g082950.2.1 | 3.870273 | 6.255172 | 0.000181 | 0.001492 | 16870 | 2977  | 2723  | 873  | 122 | 56  |
| Solyc01g095530.2.1 | 3.870876 | 1.101042 | 1.25E-06 | 2.01E-05 | 306   | 301   | 130   | 14   | 14  | 3   |
| Solyc04g008330.1.1 | 3.872194 | 2.984676 | 8.02E-07 | 1.36E-05 | 260   | 1456  | 1379  | 75   | 29  | 8   |
| Solyc07g055930.2.1 | 3.874478 | 2.629534 | 1.59E-05 | 0.000183 | 155   | 1680  | 788   | 2    | 64  | 28  |
| Solyc12g098600.1.1 | 3.881159 | 2.566473 | 1.47E-07 | 3.01E-06 | 639   | 737   | 703   | 57   | 13  | 10  |
| Solyc05g026100.1.1 | 3.887505 | -0.83916 | 0.00059  | 0.004058 | 22    | 118   | 66    | 0    | 4   | 3   |
| Solyc10g018300.1.1 | 3.902273 | 6.543035 | 5.18E-08 | 1.20E-06 | 14273 | 11451 | 6232  | 860  | 332 | 109 |
| Solyc06g074970.1.1 | 3.914171 | 2.308084 | 2.94E-08 | 7.22E-07 | 216   | 1091  | 677   | 8    | 34  | 26  |
| Solyc01g091230.2.1 | 3.918976 | 0.774463 | 2.63E-07 | 5.07E-06 | 114   | 285   | 232   | 5    | 11  | 7   |
| Solyc11g008480.1.1 | 3.927107 | -0.35833 | 0.000272 | 0.002117 | 109   | 90    | 53    | 7    | 3   | 0   |
| Solyc04g009980.2.1 | 3.93005  | -0.47502 | 0.000396 | 0.002901 | 24    | 104   | 127   | 0    | 5   | 4   |
| Solyc03g093540.1.1 | 3.931579 | 1.950198 | 3.84E-07 | 7.10E-06 | 161   | 1114  | 366   | 5    | 26  | 21  |
| Solyc03g005770.1.1 | 3.934152 | 5.451283 | 2.17E-06 | 3.24E-05 | 8820  | 1776  | 2594  | 394  | 116 | 72  |
| Solyc06g053210.2.1 | 3.934682 | -1.11084 | 0.000567 | 0.003922 | 58    | 59    | 30    | 0    | 5   | 1   |
| Solyc07g014590.2.1 | 3.93676  | 2.938281 | 3.36E-08 | 8.09E-07 | 160   | 1727  | 1253  | 20   | 56  | 31  |
| Solyc02g071380.2.1 | 3.94832  | 2.016581 | 0.000172 | 0.001428 | 716   | 560   | 98    | 19   | 44  | 0   |
| Solyc03g025390.2.1 | 3.951468 | 4.545091 | 1.12E-12 | 6.80E-11 | 988   | 5056  | 3372  | 155  | 92  | 63  |
| Solyc12g062250.1.1 | 3.957561 | 2.561601 | 1.59E-09 | 5.15E-08 | 611   | 917   | 623   | 45   | 27  | 8   |
| Solyc06g068620.2.1 | 3.966737 | 2.344341 | 2.15E-08 | 5.49E-07 | 316   | 747   | 820   | 6    | 44  | 21  |
| Solyc08g079240.2.1 | 3.967435 | 3.605328 | 6.93E-11 | 3.02E-09 | 1539  | 1593  | 1147  | 85   | 26  | 41  |
| Solyc01g100770.2.1 | 3.977281 | 4.67403  | 1.93E-11 | 9.54E-10 | 1984  | 3650  | 3777  | 186  | 141 | 27  |
| Solyc08g066840.2.1 | 3.978708 | 5.427164 | 2.42E-06 | 3.55E-05 | 662   | 10351 | 7028  | 28   | 422 | 172 |
| Solyc07g008570.2.1 | 3.981666 | 4.13036  | 8.74E-09 | 2.45E-07 | 270   | 4754  | 2504  | 63   | 137 | 47  |
| Solyc05g043330.2.1 | 3.993673 | -0.27072 | 0.000458 | 0.00328  | 136   | 83    | 41    | 5    | 0   | 4   |
| Solyc01g008930.2.1 | 3.995355 | 1.226089 | 1.35E-07 | 2.80E-06 | 103   | 554   | 286   | 6    | 14  | 10  |
| Solyc10g009580.2.1 | 3.998795 | 1.458729 | 8.15E-06 | 0.000102 | 411   | 408   | 138   | 25   | 8   | 2   |
| Solyc08g080050.2.1 | 4.003847 | 5.182766 | 8.82E-07 | 1.48E-05 | 6227  | 3094  | 2512  | 350  | 91  | 27  |
| Solyc08g075100.2.1 | 4.012093 | 3.317347 | 9.20E-14 | 6.66E-12 | 754   | 1781  | 1265  | 34   | 40  | 49  |
| Solyc03g005960.2.1 | 4.036369 | 1.865218 | 6.89E-06 | 8.84E-05 | 40    | 672   | 730   | 8    | 30  | 11  |
| Solyc05g006440.2.1 | 4.036609 | 4.169053 | 8.13E-13 | 5.03E-11 | 1865  | 2415  | 2192  | 129  | 78  | 26  |
| Solyc02g070800.2.1 | 4.042215 | 6.390985 | 8.67E-11 | 3.70E-09 | 12793 | 7605  | 7555  | 574  | 358 | 148 |
| Solyc07g043480.1.1 | 4.043158 | 1.536537 | 2.06E-06 | 3.09E-05 | 74    | 919   | 279   | 20   | 11  | 5   |
| Solyc06g051460.2.1 | 4.046695 | 1.951846 | 9.84E-06 | 0.00012  | 258   | 645   | 554   | 0    | 28  | 21  |
| Solyc01g099560.2.1 | 4.050677 | -0.09135 | 5.59E-06 | 7.39E-05 | 55    | 184   | 112   | 2    | 5   | 4   |
| Solyc07g043390.2.1 | 4.056443 | 6.044005 | 3.86E-12 | 2.14E-10 | 3663  | 20161 | 4845  | 400  | 261 | 164 |
| Solyc04g079560.2.1 | 4.056645 | 1.159312 | 0.000173 | 0.001435 | 65    | 361   | 424   | 0    | 30  | 3   |
| Solyc03g117800.2.1 | 4.063265 | 3.97003  | 3.18E-09 | 9.70E-08 | 349   | 5528  | 1310  | 43   | 105 | 55  |
| Solyc07g043400.1.1 | 4.068589 | 3.087766 | 1.07E-09 | 3.58E-08 | 482   | 2441  | 696   | 46   | 59  | 9   |
| Solyc03g115540.1.1 | 4.070578 | 3.045503 | 1.20E-13 | 8.46E-12 | 997   | 1349  | 672   | 33   | 48  | 24  |
| Solyc11g006230.1.1 | 4.071025 | -0.38967 | 0.000517 | 0.003619 | 64    | 214   | 23    | 0    | 9   | 1   |
| Solyc05g011890.1.1 | 4.072839 | 2.607122 | 7.14E-08 | 1.58E-06 | 178   | 2011  | 533   | 11   | 51  | 19  |
| Solyc03g005760.1.1 | 4.072887 | 7.055359 | 1.02E-10 | 4.32E-09 | 22014 | 9696  | 11383 | 727  | 733 | 262 |
| Solyc01g095930.2.1 | 4.074268 | -0.18025 | 0.000578 | 0.003984 | 22    | 215   | 113   | 0    | 2   | 7   |
| Solyc06g005220.2.1 | 4.076027 | -0.97422 | 0.000319 | 0.002424 | 22    | 113   | 54    | 0    | 5   | 1   |
| Solyc01g009260.1.1 | 4.077162 | -0.84089 | 0.000866 | 0.005625 | 10    | 96    | 96    | 0    | 3   | 3   |
| Solyc04g054740.2.1 | 4.090399 | 5.162076 | 6.29E-06 | 8.20E-05 | 6385  | 3366  | 2010  | 356  | 43  | 25  |
| Solyc11g071240.1.1 | 4.097948 | -0.56522 | 0.000239 | 0.001897 | 111   | 53    | 41    | 3    | 1   | 3   |
| Solyc01g058170.2.1 | 4.106283 | -0.09936 | 2.99E-06 | 4.27E-05 | 66    | 133   | 131   | 3    | 6   | 2   |
| Solyc01g098500.2.1 | 4.107301 | 4.110766 | 5.61E-14 | 4.15E-12 | 679   | 3406  | 2806  | 63   | 114 | 44  |
| Solyc04g082010.1.1 | 4.107777 | 6.80284  | 0.001078 | 0.006751 | 27814 | 1982  | 1951  | 1156 | 101 | 49  |
| Solyc10g078260.1.1 | 4.108454 | 2.599757 | 9.54E-12 | 4.98E-10 | 335   | 1468  | 677   | 26   | 28  | 19  |
| Solyc03g119960.2.1 | 4.109292 | 1.690627 | 4.09E-06 | 5.61E-05 | 121   | 630   | 519   | 1    | 19  | 18  |
| Solyc08g074650.2.1 | 4.111847 | 3.091458 | 3.96E-08 | 9.37E-07 | 406   | 954   | 1750  | 65   | 28  | 10  |
| Solyc10g078250.1.1 | 4.114974 | 0.798922 | 7.89E-07 | 1.34E-05 | 76    | 360   | 245   | 10   | 9   | 2   |
| Solyc07g053200.2.1 | 4.11637  | 2.94033  | 1.66E-11 | 8.32E-10 | 327   | 1685  | 1096  | 30   | 52  | 16  |



|                    |          |          |          |          |        |        |         |       |      |      |
|--------------------|----------|----------|----------|----------|--------|--------|---------|-------|------|------|
| Solyc01g079470.2.1 | 4.117295 | 3.233969 | 9.93E-10 | 3.37E-08 | 1181   | 780    | 1203    | 17    | 94   | 18   |
| Solyc01g090730.2.1 | 4.124022 | -0.18563 | 0.000122 | 0.001074 | 29     | 145    | 150     | 0     | 6    | 4    |
| Solyc03g020070.2.1 | 4.138379 | 3.739299 | 0.000455 | 0.003267 | 3167   | 377    | 335     | 135   | 13   | 5    |
| Solyc09g008670.2.1 | 4.143219 | 12.14973 | 6.11E-07 | 1.07E-05 | 166195 | 442270 | 1049170 | 37666 | 8923 | 5891 |
| Solyc01g079620.2.1 | 4.147631 | -0.07074 | 6.14E-05 | 0.000596 | 75     | 210    | 76      | 0     | 4    | 6    |
| Solyc02g065780.1.1 | 4.149943 | 0.234878 | 7.53E-05 | 0.000709 | 23     | 207    | 219     | 2     | 12   | 1    |
| Solyc06g082940.2.1 | 4.165186 | 7.314979 | 3.26E-05 | 0.000346 | 29546  | 9208   | 11388   | 1555  | 139  | 94   |
| Solyc08g081890.2.1 | 4.167646 | 1.781889 | 4.59E-07 | 8.29E-06 | 319    | 509    | 427     | 1     | 33   | 10   |
| Solyc01g087770.2.1 | 4.170899 | 1.371105 | 7.70E-05 | 0.000723 | 603    | 75     | 66      | 5     | 15   | 10   |
| Solyc03g093180.1.1 | 4.172824 | -2.1603  | 0.00158  | 0.009337 | 18     | 35     | 15      | 0     | 2    | 0    |
| Solyc04g077570.1.1 | 4.194787 | -0.39125 | 2.65E-05 | 0.000286 | 104    | 54     | 79      | 3     | 3    | 2    |
| Solyc10g009380.2.1 | 4.195264 | 1.368904 | 1.41E-05 | 0.000165 | 41     | 660    | 384     | 9     | 23   | 1    |
| Solyc10g006900.2.1 | 4.196941 | 4.401009 | 2.85E-08 | 7.01E-07 | 4304   | 1264   | 1003    | 135   | 67   | 38   |
| Solyc03g112760.2.1 | 4.205957 | 3.919618 | 1.11E-14 | 9.24E-13 | 1076   | 2297   | 2316    | 29    | 118  | 40   |
| Solyc06g068040.2.1 | 4.220516 | 2.499443 | 7.32E-11 | 3.17E-09 | 531    | 555    | 889     | 12    | 39   | 16   |
| Solyc10g076710.1.1 | 4.225869 | 3.809206 | 5.41E-11 | 2.42E-09 | 398    | 2964   | 2355    | 27    | 100  | 41   |
| Solyc05g056050.2.1 | 4.228751 | 3.994865 | 0.000109 | 0.000976 | 3996   | 172    | 331     | 112   | 46   | 20   |
| Solyc12g008580.1.1 | 4.247702 | 0.501621 | 6.21E-06 | 8.11E-05 | 59     | 307    | 193     | 1     | 14   | 2    |
| Solyc02g019790.2.1 | 4.250823 | 1.272365 | 9.98E-09 | 2.77E-07 | 249    | 388    | 246     | 14    | 8    | 4    |
| Solyc04g016220.2.1 | 4.251095 | 1.700357 | 7.26E-09 | 2.08E-07 | 326    | 521    | 350     | 16    | 20   | 2    |
| Solyc08g076980.2.1 | 4.259777 | 3.651878 | 6.01E-09 | 1.75E-07 | 258    | 1366   | 3060    | 41    | 62   | 37   |
| Solyc07g053630.2.1 | 4.267946 | 4.543895 | 8.63E-18 | 1.06E-15 | 1143   | 5097   | 3242    | 72    | 116  | 71   |
| Solyc07g052950.2.1 | 4.273882 | -0.61935 | 0.000985 | 0.006265 | 24     | 155    | 73      | 6     | 0    | 0    |
| Solyc10g012050.2.1 | 4.275822 | 3.617643 | 1.14E-10 | 4.73E-09 | 305    | 2112   | 2429    | 43    | 73   | 25   |
| Solyc01g096280.1.1 | 4.276743 | 0.574194 | 1.05E-05 | 0.000127 | 70     | 331    | 189     | 0     | 13   | 4    |
| Solyc02g077720.2.1 | 4.281936 | 1.388013 | 3.23E-09 | 9.82E-08 | 142    | 655    | 276     | 9     | 12   | 7    |
| Solyc08g005770.2.1 | 4.301096 | -0.48458 | 0.000626 | 0.004271 | 14     | 53     | 174     | 0     | 4    | 3    |
| Solyc10g055520.1.1 | 4.306525 | -0.91831 | 8.03E-05 | 0.00075  | 45     | 75     | 59      | 0     | 3    | 2    |
| Solyc01g006330.2.1 | 4.308536 | 1.431532 | 0.000454 | 0.00326  | 616    | 96     | 78      | 24    | 2    | 1    |
| Solyc03g113060.2.1 | 4.325773 | 3.753059 | 8.52E-17 | 9.38E-15 | 844    | 2248   | 2091    | 43    | 48   | 47   |
| Solyc03g044590.2.1 | 4.327254 | -0.33313 | 0.000158 | 0.001334 | 28     | 184    | 98      | 0     | 2    | 5    |
| Solyc10g080340.1.1 | 4.366076 | -0.59803 | 5.16E-05 | 0.000513 | 44     | 104    | 86      | 0     | 3    | 3    |
| Solyc02g071020.2.1 | 4.376267 | 6.186242 | 9.16E-06 | 0.000113 | 14252  | 5334   | 3745    | 609   | 71   | 36   |
| Solyc06g019170.2.1 | 4.381516 | 2.93632  | 2.37E-06 | 3.49E-05 | 42     | 2754   | 782     | 30    | 36   | 14   |
| Solyc07g051820.2.1 | 4.385191 | 4.043399 | 1.63E-07 | 3.29E-06 | 213    | 4540   | 2448    | 15    | 136  | 37   |
| Solyc09g014740.2.1 | 4.387049 | 2.828853 | 2.97E-14 | 2.32E-12 | 550    | 1595   | 707     | 19    | 43   | 14   |
| Solyc09g074450.1.1 | 4.420977 | 0.185008 | 0.00021  | 0.001696 | 73     | 265    | 109     | 10    | 0    | 0    |
| Solyc08g005960.1.1 | 4.425087 | 3.427516 | 4.45E-08 | 1.04E-06 | 976    | 1295   | 1619    | 6     | 20   | 66   |
| Solyc02g077430.2.1 | 4.431682 | 5.324008 | 3.88E-15 | 3.43E-13 | 4144   | 6224   | 4564    | 174   | 221  | 33   |
| Solyc02g081920.2.1 | 4.433707 | 3.392092 | 2.80E-09 | 8.65E-08 | 302    | 2375   | 1680    | 13    | 89   | 16   |
| Solyc06g008500.2.1 | 4.43816  | 0.195172 | 0.000203 | 0.001651 | 100    | 129    | 167     | 10    | 0    | 0    |
| Solyc08g077060.2.1 | 4.44547  | 1.521877 | 2.34E-07 | 4.58E-06 | 280    | 472    | 316     | 10    | 21   | 0    |
| Solyc02g077420.2.1 | 4.485108 | 5.168356 | 2.07E-18 | 2.70E-16 | 3674   | 4317   | 4982    | 110   | 213  | 49   |
| Solyc10g086250.1.1 | 4.491632 | 2.445215 | 0.000783 | 0.005167 | 7      | 1586   | 823     | 0     | 43   | 14   |
| Solyc04g015620.2.1 | 4.492437 | 2.814376 | 6.00E-05 | 0.000585 | 1779   | 133    | 102     | 39    | 14   | 11   |
| Solyc02g076690.2.1 | 4.500927 | 6.112398 | 1.60E-08 | 4.22E-07 | 14684  | 3950   | 2942    | 351   | 165  | 120  |
| Solyc07g005680.2.1 | 4.511724 | 0.165004 | 4.51E-05 | 0.000456 | 25     | 181    | 218     | 0     | 6    | 4    |
| Solyc01g107730.2.1 | 4.514322 | -0.10843 | 1.02E-05 | 0.000125 | 37     | 110    | 183     | 1     | 4    | 3    |
| Solyc10g086580.1.1 | 4.518061 | 8.715515 | 3.14E-05 | 0.000334 | 100761 | 14782  | 9588    | 2982  | 555  | 264  |
| Solyc05g012510.2.1 | 4.521104 | 5.230971 | 2.48E-14 | 1.97E-12 | 1040   | 7969   | 6477    | 111   | 150  | 91   |
| Solyc12g013710.1.1 | 4.547998 | 2.800039 | 1.43E-06 | 2.26E-05 | 1394   | 450    | 356     | 47    | 9    | 5    |
| Solyc06g048620.2.1 | 4.549141 | 0.769264 | 6.05E-06 | 7.93E-05 | 72     | 333    | 263     | 11    | 4    | 0    |
| Solyc02g030170.2.1 | 4.553415 | 6.653019 | 2.45E-20 | 4.20E-18 | 9270   | 17425  | 11889   | 209   | 470  | 262  |
| Solyc12g011450.1.1 | 4.564176 | 6.484641 | 0.000115 | 0.00102  | 22764  | 2133   | 1108    | 606   | 155  | 39   |
| Solyc06g049030.2.1 | 4.565543 | 2.073684 | 2.94E-06 | 4.21E-05 | 182    | 1074   | 514     | 0     | 38   | 6    |
| Solyc04g005070.2.1 | 4.573834 | 2.865543 | 2.01E-07 | 4.00E-06 | 84     | 2274   | 926     | 9     | 50   | 13   |
| Solyc10g084950.1.1 | 4.580315 | 2.033282 | 1.89E-12 | 1.11E-10 | 382    | 625    | 513     | 13    | 11   | 11   |
| Solyc10g018780.1.1 | 4.585288 | -0.22553 | 2.47E-05 | 0.000269 | 31     | 170    | 127     | 0     | 4    | 3    |
| Solyc09g065620.2.1 | 4.599663 | 6.470767 | 1.95E-07 | 3.89E-06 | 537    | 15162  | 20101   | 179   | 487  | 174  |
| Solyc10g047110.1.1 | 4.602582 | 0.414076 | 0.001    | 0.006336 | 328    | 17     | 26      | 6     | 6    | 0    |
| Solyc12g062500.1.1 | 4.602996 | 0.244054 | 0.000254 | 0.001997 | 257    | 38     | 49      | 7     | 3    | 0    |
| Solyc09g011080.2.1 | 4.623361 | 0.388778 | 7.92E-06 | 9.97E-05 | 250    | 136    | 37      | 4     | 5    | 2    |
| Solyc02g070990.1.1 | 4.627307 | 1.776102 | 0.000316 | 0.002403 | 893    | 61     | 16      | 14    | 7    | 7    |
| Solyc02g064690.2.1 | 4.631031 | 2.489809 | 4.06E-09 | 1.22E-07 | 464    | 1177   | 587     | 6     | 48   | 3    |
| Solyc02g068170.1.1 | 4.635161 | -0.04544 | 0.000144 | 0.001233 | 202    | 57     | 31      | 0     | 5    | 3    |
| Solyc02g064720.2.1 | 4.638804 | 0.404525 | 3.26E-05 | 0.000345 | 36     | 461    | 95      | 0     | 10   | 2    |
| Solyc02g037550.2.1 | 4.642648 | 0.879478 | 0.000191 | 0.001567 | 8      | 531    | 262     | 0     | 8    | 7    |
| Solyc06g068160.2.1 | 4.650846 | 0.033875 | 0.00024  | 0.001905 | 199    | 126    | 9       | 3     | 6    | 0    |
| Solyc05g056070.2.1 | 4.662335 | 6.367437 | 7.08E-07 | 1.22E-05 | 16405  | 4377   | 5242    | 519   | 141  | 33   |
| Solyc03g117690.2.1 | 4.665365 | 2.396914 | 4.13E-12 | 2.27E-10 | 297    | 1211   | 652     | 16    | 26   | 5    |
| Solyc02g090030.2.1 | 4.671316 | 6.763163 | 6.05E-11 | 2.66E-09 | 17641  | 11554  | 8106    | 577   | 209  | 112  |
| Solyc12g006470.1.1 | 4.679528 | 6.170547 | 4.85E-10 | 1.76E-08 | 5728   | 18174  | 6082    | 431   | 118  | 44   |
| Solyc05g015800.2.1 | 4.682449 | 3.563679 | 6.38E-06 | 8.30E-05 | 51     | 1813   | 2830    | 13    | 92   | 11   |
| Solyc02g070380.1.1 | 4.70073  | -1.01797 | 0.001439 | 0.008642 | 93     | 30     | 20      | 0     | 0    | 3    |
| Solyc11g069980.1.1 | 4.704918 | -0.82736 | 6.14E-05 | 0.000596 | 55     | 53     | 75      | 3     | 1    | 0    |
| Solyc05g050370.1.1 | 4.705002 | -1.58972 | 0.000514 | 0.003606 | 16     | 66     | 34      | 2     | 0    | 0    |
| Solyc03g093700.1.1 | 4.706091 | -1.51479 | 0.000867 | 0.005632 | 17     | 55     | 46      | 0     | 0    | 2    |
| Solyc06g005070.1.1 | 4.71997  | 0.872107 | 1.70E-06 | 2.63E-05 | 231    | 340    | 108     | 9     | 0    | 4    |
| Solyc10g006530.2.1 | 4.720528 | 0.673474 | 0.000338 | 0.002548 | 341    | 46     | 82      | 11    | 1    | 0    |
| Solyc02g077140.2.1 | 4.73613  | -0.46516 | 2.10E-05 | 0.000232 | 67     | 110    | 79      | 0     | 6    | 0    |
| Solyc03g046580.1.1 | 4.739099 | -0.36201 | 0.000245 | 0.001936 | 157    | 17     | 48      | 3     | 3    | 0    |
| Solyc04g050930.2.1 | 4.746286 | 2.010424 | 3.01E-08 | 7.36E-07 | 199    | 792    | 617     | 22    | 9    | 1    |
| Solyc07g063910.2.1 | 4.749588 | 2.537837 | 0.000197 | 0.001606 | 611    | 1705   | 137     | 42    | 0    | 1    |
| Solyc01g021730.2.1 | 4.753984 | -2.3308  | 0.001467 | 0.008781 | 9      | 45     | 11      | 0     | 1    | 0    |

|                    |          |          |          |          |       |        |        |      |      |      |
|--------------------|----------|----------|----------|----------|-------|--------|--------|------|------|------|
| Solyc02g080200.2.1 | 4.76339  | 0.687872 | 3.10E-06 | 4.40E-05 | 260   | 135    | 130    | 0    | 6    | 6    |
| Solyc11g008630.1.1 | 4.76434  | 3.081568 | 2.41E-11 | 1.17E-09 | 1138  | 1010   | 848    | 18   | 54   | 4    |
| Solyc12g094720.1.1 | 4.775088 | 1.560752 | 3.38E-10 | 1.28E-08 | 355   | 385    | 313    | 3    | 9    | 10   |
| Solyc03g114310.2.1 | 4.776484 | 0.431342 | 1.52E-06 | 2.39E-05 | 64    | 255    | 204    | 0    | 9    | 2    |
| Solyc07g045080.2.1 | 4.785121 | 0.993577 | 0.000344 | 0.00258  | 449   | 47     | 85     | 13   | 0    | 1    |
| Solyc02g067360.2.1 | 4.794994 | 1.722171 | 5.37E-09 | 1.57E-07 | 305   | 581    | 369    | 6    | 2    | 14   |
| Solyc09g083440.2.1 | 4.803825 | 10.55987 | 3.74E-08 | 8.89E-07 | 21867 | 156851 | 393792 | 5743 | 2276 | 2951 |
| Solyc12g010550.1.1 | 4.810781 | 2.24507  | 1.56E-06 | 2.43E-05 | 54    | 1540   | 565    | 2    | 14   | 18   |
| Solyc01g097770.2.1 | 4.811937 | 5.107389 | 6.80E-15 | 5.76E-13 | 1609  | 9373   | 3913   | 137  | 110  | 27   |
| Solyc03g043740.2.1 | 4.812077 | 0.792992 | 7.31E-07 | 1.25E-05 | 318   | 136    | 101    | 7    | 5    | 1    |
| Solyc10g055730.1.1 | 4.817547 | 1.189657 | 1.19E-10 | 4.94E-09 | 201   | 344    | 300    | 4    | 8    | 5    |
| Solyc12g042180.1.1 | 4.823783 | -0.4254  | 7.30E-05 | 0.000693 | 149   | 56     | 21     | 1    | 2    | 2    |
| Solyc06g054130.1.1 | 4.845318 | -1.49385 | 0.000462 | 0.003307 | 48    | 33     | 26     | 2    | 0    | 0    |
| Solyc03g119540.2.1 | 4.848743 | 4.663975 | 1.44E-24 | 4.01E-22 | 2045  | 5192   | 2894   | 42   | 87   | 61   |
| Solyc04g014530.1.1 | 4.864668 | 2.987002 | 3.07E-13 | 2.04E-11 | 331   | 1511   | 1345   | 21   | 14   | 20   |
| Solyc01g087780.2.1 | 4.876759 | 4.850983 | 3.16E-09 | 9.66E-08 | 5662  | 2102   | 1599   | 144  | 35   | 25   |
| Solyc07g042630.2.1 | 4.882776 | 3.176566 | 7.00E-12 | 3.74E-10 | 345   | 3050   | 734    | 25   | 37   | 8    |
| Solyc12g008800.1.1 | 4.892231 | 2.667166 | 5.42E-13 | 3.46E-11 | 736   | 828    | 738    | 26   | 15   | 5    |
| Solyc03g083510.2.1 | 4.898792 | -1.12576 | 4.84E-05 | 0.000484 | 25    | 73     | 63     | 0    | 3    | 0    |
| Solyc10g008720.2.1 | 4.902065 | 1.887767 | 8.29E-09 | 2.35E-07 | 209   | 627    | 601    | 19   | 3    | 3    |
| Solyc02g077980.1.1 | 4.909808 | 0.580979 | 8.39E-07 | 1.42E-05 | 69    | 412    | 148    | 0    | 5    | 5    |
| Solyc05g009270.2.1 | 4.921149 | -1.5485  | 8.86E-05 | 0.000814 | 26    | 47     | 39     | 0    | 2    | 0    |
| Solyc03g122360.2.1 | 4.940298 | 2.06114  | 1.28E-05 | 0.000151 | 42    | 1030   | 714    | 0    | 11   | 16   |
| Solyc02g064940.1.1 | 4.940814 | 4.970985 | 9.17E-18 | 1.11E-15 | 2735  | 5918   | 3677   | 22   | 148  | 65   |
| Solyc02g071010.1.1 | 4.94487  | 5.482231 | 0.000841 | 0.005484 | 12089 | 181    | 354    | 266  | 19   | 13   |
| Solyc02g066920.2.1 | 4.950008 | 0.590728 | 0.000354 | 0.002635 | 367   | 46     | 22     | 6    | 0    | 3    |
| Solyc02g020940.2.1 | 4.957067 | 5.172257 | 6.87E-21 | 1.30E-18 | 4635  | 4663   | 3752   | 96   | 137  | 34   |
| Solyc01g110180.2.1 | 4.972991 | -0.06982 | 4.21E-05 | 0.00043  | 23    | 193    | 159    | 0    | 7    | 0    |
| Solyc02g065530.2.1 | 4.989519 | -0.249   | 2.12E-05 | 0.000235 | 127   | 71     | 73     | 0    | 6    | 0    |
| Solyc03g005780.1.1 | 4.996771 | 5.399715 | 0.000439 | 0.003164 | 11498 | 272    | 185    | 224  | 38   | 15   |
| Solyc05g008300.1.1 | 4.999934 | -0.38993 | 4.39E-05 | 0.000445 | 85    | 86     | 86     | 0    | 0    | 4    |
| Solyc02g081340.2.1 | 5.002807 | 1.726745 | 3.82E-05 | 0.000396 | 4     | 1298   | 292    | 8    | 12   | 3    |
| Solyc10g007690.2.1 | 5.012367 | 7.137348 | 2.41E-08 | 6.09E-07 | 31820 | 6667   | 5087   | 558  | 224  | 141  |
| Solyc11g045530.1.1 | 5.013548 | -1.25217 | 0.000537 | 0.003745 | 16    | 49     | 76     | 0    | 0    | 2    |
| Solyc06g083900.2.1 | 5.017023 | 0.973334 | 9.87E-07 | 1.63E-05 | 31    | 251    | 462    | 5    | 3    | 4    |
| Solyc11g010340.1.1 | 5.018216 | -2.02611 | 0.00096  | 0.006123 | 17    | 24     | 32     | 0    | 0    | 1    |
| Solyc08g083360.2.1 | 5.023526 | 3.969666 | 4.87E-08 | 1.13E-06 | 3310  | 665    | 889    | 69   | 30   | 6    |
| Solyc08g066630.2.1 | 5.049473 | -2.12312 | 0.000337 | 0.002538 | 22    | 27     | 19     | 0    | 1    | 0    |
| Solyc08g006830.2.1 | 5.064251 | 1.334052 | 2.38E-11 | 1.15E-09 | 281   | 392    | 258    | 3    | 8    | 5    |
| Solyc02g063150.2.1 | 5.105696 | 7.824537 | 0.00028  | 0.002169 | 58368 | 4666   | 3369   | 1262 | 67   | 30   |
| Solyc05g009500.2.1 | 5.116688 | 0.864655 | 8.24E-06 | 0.000103 | 146   | 337    | 216    | 0    | 0    | 9    |
| Solyc02g085020.2.1 | 5.131268 | 1.578014 | 0.000466 | 0.003329 | 0     | 1210   | 243    | 9    | 9    | 1    |
| Solyc01g102720.2.1 | 5.140013 | 1.045825 | 1.41E-07 | 2.90E-06 | 237   | 258    | 241    | 10   | 2    | 0    |
| Solyc05g026490.2.1 | 5.151976 | 0.812448 | 0.000109 | 0.000974 | 431   | 44     | 34     | 2    | 10   | 0    |
| Solyc05g010060.2.1 | 5.153127 | -1.91214 | 0.000495 | 0.003489 | 16    | 39     | 30     | 0    | 0    | 1    |
| Solyc08g075880.2.1 | 5.158398 | 1.585603 | 2.84E-12 | 1.61E-10 | 232   | 551    | 386    | 5    | 12   | 2    |
| Solyc11g072310.1.1 | 5.1794   | 0.165517 | 0.001242 | 0.007619 | 0     | 236    | 219    | 0    | 6    | 1    |
| Solyc07g043460.2.1 | 5.179936 | 4.323027 | 3.21E-05 | 0.000341 | 391   | 6526   | 2298   | 107  | 1    | 4    |
| Solyc01g090760.2.1 | 5.182954 | -0.8322  | 3.48E-05 | 0.000365 | 93    | 58     | 27     | 1    | 2    | 0    |
| Solyc12g005020.1.1 | 5.197839 | -0.33514 | 0.000856 | 0.005567 | 184   | 28     | 15     | 4    | 0    | 0    |
| Solyc10g083860.1.1 | 5.198277 | -0.69249 | 9.63E-06 | 0.000118 | 72    | 100    | 44     | 0    | 1    | 2    |
| Solyc09g065800.2.1 | 5.212244 | -1.3568  | 0.00137  | 0.00829  | 77    | 35     | 3      | 0    | 2    | 0    |
| Solyc10g055790.1.1 | 5.212674 | -0.86048 | 1.88E-05 | 0.000212 | 62    | 43     | 71     | 0    | 3    | 0    |
| Solyc07g006650.2.1 | 5.21421  | -1.16029 | 0.000121 | 0.001064 | 44    | 101    | 18     | 2    | 0    | 0    |
| Solyc09g075240.1.1 | 5.21827  | -1.86612 | 0.00038  | 0.002802 | 22    | 33     | 30     | 0    | 0    | 1    |
| Solyc04g009880.1.1 | 5.232361 | -1.98006 | 0.000212 | 0.001712 | 26    | 25     | 24     | 0    | 1    | 0    |
| Solyc12g096490.1.1 | 5.261434 | -0.06695 | 4.39E-06 | 5.97E-05 | 168   | 89     | 51     | 0    | 3    | 2    |
| Solyc03g116730.2.1 | 5.323196 | 3.377047 | 0.000825 | 0.005396 | 2879  | 18     | 27     | 42   | 5    | 6    |
| Solyc08g061560.2.1 | 5.335251 | 2.421645 | 4.57E-12 | 2.50E-10 | 297   | 1020   | 831    | 15   | 14   | 1    |
| Solyc06g009190.2.1 | 5.372842 | 3.79766  | 7.70E-08 | 1.69E-06 | 186   | 2803   | 2817   | 23   | 61   | 1    |
| Solyc08g075150.2.1 | 5.388533 | 0.398148 | 1.45E-06 | 2.29E-05 | 34    | 438    | 117    | 0    | 6    | 1    |
| Solyc01g014380.2.1 | 5.395105 | -0.0179  | 1.20E-05 | 0.000142 | 36    | 247    | 121    | 0    | 0    | 4    |
| Solyc12g098900.1.1 | 5.403511 | 1.883053 | 4.14E-05 | 0.000424 | 588   | 816    | 20     | 16   | 2    | 0    |
| Solyc09g007480.2.1 | 5.414448 | 1.639315 | 5.64E-12 | 3.05E-10 | 221   | 651    | 380    | 2    | 13   | 2    |
| Solyc12g009650.1.1 | 5.43947  | 5.971179 | 1.49E-05 | 0.000172 | 16900 | 543    | 600    | 192  | 65   | 48   |
| Solyc02g092050.2.1 | 5.445245 | -0.35685 | 0.001612 | 0.009488 | 0     | 150    | 157    | 0    | 4    | 0    |
| Solyc07g006620.2.1 | 5.453056 | 1.687646 | 1.45E-08 | 3.87E-07 | 492   | 319    | 296    | 0    | 16   | 2    |
| Solyc12g009930.1.1 | 5.463362 | 6.731125 | 3.18E-08 | 7.74E-07 | 396   | 26970  | 19440  | 91   | 349  | 127  |
| Solyc02g088190.2.1 | 5.470391 | 1.114679 | 3.51E-10 | 1.32E-08 | 236   | 291    | 260    | 7    | 2    | 1    |
| Solyc02g070230.1.1 | 5.556175 | 0.110236 | 1.15E-06 | 1.86E-05 | 78    | 200    | 133    | 0    | 0    | 4    |
| Solyc10g085610.1.1 | 5.559962 | 1.485265 | 2.81E-10 | 1.09E-08 | 213   | 563    | 338    | 0    | 12   | 2    |
| Solyc08g013670.2.1 | 5.566246 | 6.744107 | 1.78E-06 | 2.74E-05 | 26971 | 2866   | 2236   | 364  | 47   | 56   |
| Solyc09g061730.1.1 | 5.569092 | 0.369324 | 1.71E-05 | 0.000195 | 8     | 419    | 153    | 0    | 5    | 1    |
| Solyc08g067320.1.1 | 5.569914 | 1.020687 | 4.74E-05 | 0.000476 | 490   | 24     | 72     | 5    | 0    | 3    |
| Solyc05g007090.2.1 | 5.586518 | 0.378993 | 2.56E-08 | 6.39E-07 | 114   | 207    | 162    | 2    | 0    | 3    |
| Solyc06g074760.1.1 | 5.623219 | -0.93107 | 2.31E-06 | 3.41E-05 | 51    | 72     | 57     | 0    | 2    | 0    |
| Solyc11g012880.1.1 | 5.635031 | -1.65646 | 0.000104 | 0.000938 | 45    | 23     | 25     | 0    | 1    | 0    |
| Solyc08g082650.2.1 | 5.654237 | -1.50722 | 0.000344 | 0.00258  | 59    | 27     | 17     | 0    | 0    | 1    |
| Solyc11g066270.1.1 | 5.659126 | 1.243348 | 5.26E-07 | 9.40E-06 | 25    | 610    | 388    | 0    | 6    | 4    |
| Solyc10g084340.1.1 | 5.672331 | -0.0766  | 9.24E-08 | 1.99E-06 | 89    | 152    | 107    | 0    | 4    | 0    |
| Solyc09g018890.2.1 | 5.693193 | 3.35983  | 7.20E-07 | 1.24E-05 | 2585  | 327    | 171    | 28   | 14   | 2    |
| Solyc08g074480.1.1 | 5.704967 | 6.141108 | 1.76E-13 | 1.22E-11 | 9112  | 8215   | 8200   | 14   | 154  | 127  |
| Solyc04g024830.1.1 | 5.705691 | -1.56799 | 2.07E-05 | 0.00023  | 25    | 57     | 33     | 0    | 1    | 0    |
| Solyc04g076190.1.1 | 5.711203 | -1.63355 | 0.001665 | 0.009748 | 70    | 14     | 3      | 0    | 1    | 0    |

|                    |          |          |          |          |       |       |       |     |     |    |
|--------------------|----------|----------|----------|----------|-------|-------|-------|-----|-----|----|
| Solyc02g069390.1.1 | 5.74342  | -0.6245  | 9.46E-06 | 0.000116 | 31    | 107   | 101   | 0   | 0   | 2  |
| Solyc02g071030.1.1 | 5.772695 | 4.135817 | 1.03E-06 | 1.70E-05 | 3936  | 921   | 688   | 0   | 73  | 11 |
| Solyc12g056920.1.1 | 5.784049 | -1.39139 | 0.000185 | 0.001525 | 60    | 45    | 14    | 0   | 0   | 1  |
| Solyc05g005960.2.1 | 5.794958 | 3.035224 | 5.36E-19 | 7.67E-17 | 408   | 1717  | 1258  | 11  | 16  | 6  |
| Solyc11g066010.1.1 | 5.813323 | -1.47896 | 1.43E-05 | 0.000166 | 25    | 49    | 46    | 0   | 1   | 0  |
| Solyc02g071000.1.1 | 5.909601 | 2.799439 | 0.001305 | 0.007946 | 1952  | 12    | 5     | 20  | 5   | 0  |
| Solyc01g073990.2.1 | 5.913468 | -0.11584 | 3.34E-08 | 8.05E-07 | 64    | 138   | 138   | 0   | 2   | 1  |
| Solyc12g014140.1.1 | 5.921123 | 3.71747  | 1.42E-22 | 3.14E-20 | 1251  | 1523  | 2083  | 18  | 11  | 16 |
| Solyc10g008710.2.1 | 5.938306 | 0.378441 | 2.63E-08 | 6.55E-07 | 143   | 138   | 173   | 0   | 1   | 3  |
| Solyc03g031870.1.1 | 6.105439 | 1.423358 | 0.000457 | 0.003272 | 727   | 42    | 2     | 7   | 1   | 0  |
| Solyc07g032490.2.1 | 6.204579 | -1.14148 | 3.07E-06 | 4.36E-05 | 39    | 44    | 66    | 0   | 1   | 0  |
| Solyc01g073640.2.1 | 6.208499 | 5.842606 | 4.13E-10 | 1.52E-08 | 643   | 14706 | 10053 | 35  | 160 | 9  |
| Solyc12g017270.1.1 | 6.257837 | -2.85696 | 0.001495 | 0.008918 | 7     | 21    | 10    | 0   | 0   | 0  |
| Solyc06g064550.2.1 | 6.272815 | 1.001332 | 5.81E-10 | 2.08E-08 | 245   | 217   | 247   | 0   | 6   | 0  |
| Solyc06g054370.1.1 | 6.301578 | -2.83153 | 0.001441 | 0.008658 | 7     | 18    | 13    | 0   | 0   | 0  |
| Solyc07g043420.2.1 | 6.312472 | 8.132366 | 4.88E-13 | 3.13E-11 | 28828 | 82316 | 10863 | 539 | 129 | 84 |
| Solyc08g007330.2.1 | 6.345558 | 1.245141 | 7.50E-10 | 2.62E-08 | 65    | 539   | 391   | 0   | 3   | 3  |
| Solyc02g084850.2.1 | 6.355112 | 5.950264 | 4.42E-05 | 0.000448 | 112   | 32788 | 792   | 42  | 159 | 1  |
| Solyc09g082660.2.1 | 6.384328 | 1.677827 | 0.000352 | 0.002627 | 0     | 1339  | 253   | 0   | 10  | 0  |
| Solyc04g080250.2.1 | 6.395447 | -2.78595 | 0.001671 | 0.009777 | 16    | 14    | 7     | 0   | 0   | 0  |
| Solyc06g009710.2.1 | 6.454875 | -2.74248 | 0.001205 | 0.007429 | 12    | 10    | 16    | 0   | 0   | 0  |
| Solyc07g045570.1.1 | 6.483293 | -2.69582 | 0.001203 | 0.00742  | 5     | 21    | 18    | 0   | 0   | 0  |
| Solyc06g068170.1.1 | 6.506238 | -2.66297 | 0.001336 | 0.008109 | 7     | 35    | 7     | 0   | 0   | 0  |
| Solyc04g072700.2.1 | 6.522194 | 1.128402 | 2.68E-08 | 6.66E-07 | 223   | 694   | 33    | 3   | 2   | 0  |
| Solyc03g114940.2.1 | 6.544842 | 1.667596 | 7.22E-13 | 4.48E-11 | 179   | 528   | 544   | 0   | 3   | 4  |
| Solyc04g078200.2.1 | 6.589086 | -4.2354  | 1.14E-07 | 2.40E-06 | 78    | 4933  | 3402  | 0   | 34  | 13 |
| Solyc08g008050.2.1 | 6.595442 | -2.63988 | 0.000763 | 0.005055 | 16    | 13    | 13    | 0   | 0   | 0  |
| Solyc09g042670.2.1 | 6.633641 | -2.61452 | 0.001108 | 0.006924 | 13    | 8     | 21    | 0   | 0   | 0  |
| Solyc01g014560.2.1 | 6.639872 | -2.58536 | 0.001006 | 0.006368 | 15    | 29    | 5     | 0   | 0   | 0  |
| Solyc04g014970.1.1 | 6.651395 | -2.58758 | 0.000489 | 0.003467 | 13    | 18    | 15    | 0   | 0   | 0  |
| Solyc01g013900.2.1 | 6.684231 | -2.55491 | 0.000418 | 0.003041 | 10    | 22    | 17    | 0   | 0   | 0  |
| Solyc03g062710.2.1 | 6.706306 | 0.184703 | 7.32E-08 | 1.62E-06 | 188   | 71    | 107   | 2   | 0   | 0  |
| Solyc03g078810.2.1 | 6.74068  | -2.5254  | 0.000476 | 0.003389 | 18    | 19    | 11    | 0   | 0   | 0  |
| Solyc11g066580.1.1 | 6.749255 | 0.533966 | 0.000108 | 0.000967 | 0     | 514   | 162   | 0   | 3   | 0  |
| Solyc04g072320.1.1 | 6.776359 | -2.51849 | 0.001462 | 0.008762 | 27    | 13    | 5     | 0   | 0   | 0  |
| Solyc08g008480.2.1 | 6.790311 | -2.48842 | 0.000353 | 0.002632 | 16    | 16    | 17    | 0   | 0   | 0  |
| Solyc06g065450.2.1 | 6.790964 | -2.47477 | 0.000512 | 0.003597 | 7     | 19    | 26    | 0   | 0   | 0  |
| Solyc03g045070.1.1 | 6.840061 | -0.49757 | 2.42E-05 | 0.000263 | 156   | 36    | 19    | 1   | 0   | 0  |
| Solyc05g007010.1.1 | 6.871244 | 0.79289  | 1.11E-11 | 5.74E-10 | 213   | 214   | 195   | 0   | 2   | 1  |
| Solyc01g108060.1.1 | 6.879985 | -2.41875 | 0.000351 | 0.002623 | 21    | 22    | 10    | 0   | 0   | 0  |
| Solyc06g006090.1.1 | 6.88556  | -0.51768 | 1.44E-07 | 2.95E-06 | 70    | 75    | 95    | 0   | 1   | 0  |
| Solyc01g060350.1.1 | 6.909108 | -2.3947  | 0.000231 | 0.001842 | 18    | 20    | 16    | 0   | 0   | 0  |
| Solyc04g005210.1.1 | 6.929268 | -2.3528  | 0.000307 | 0.002347 | 7     | 37    | 19    | 0   | 0   | 0  |
| Solyc12g056200.1.1 | 6.982901 | -2.3548  | 0.001221 | 0.007505 | 18    | 4     | 29    | 0   | 0   | 0  |
| Solyc05g008240.2.1 | 7.014897 | -2.30455 | 0.000731 | 0.004873 | 5     | 15    | 39    | 0   | 0   | 0  |
| Solyc02g083520.2.1 | 7.041671 | -2.27504 | 0.00013  | 0.001131 | 14    | 35    | 16    | 0   | 0   | 0  |
| Solyc08g068190.2.1 | 7.044675 | -2.28678 | 0.000145 | 0.001242 | 20    | 24    | 16    | 0   | 0   | 0  |
| Solyc07g007420.2.1 | 7.063068 | -2.25382 | 0.000453 | 0.003256 | 4     | 29    | 33    | 0   | 0   | 0  |
| Solyc01g094360.2.1 | 7.066974 | -2.2545  | 0.000297 | 0.002279 | 6     | 27    | 32    | 0   | 0   | 0  |
| Solyc05g014710.2.1 | 7.07927  | -0.3358  | 1.38E-07 | 2.85E-06 | 20    | 152   | 139   | 0   | 1   | 0  |
| Solyc01g073780.2.1 | 7.081179 | -2.29233 | 0.00141  | 0.008494 | 38    | 9     | 5     | 0   | 0   | 0  |
| Solyc04g077380.2.1 | 7.084543 | -2.25471 | 0.000456 | 0.003271 | 26    | 32    | 5     | 0   | 0   | 0  |
| Solyc03g098490.1.1 | 7.094253 | -2.2272  | 0.000191 | 0.001564 | 7     | 36    | 26    | 0   | 0   | 0  |
| Solyc02g022890.1.1 | 7.122644 | -2.21484 | 8.68E-05 | 0.000801 | 15    | 32    | 20    | 0   | 0   | 0  |
| Solyc10g074680.1.1 | 7.130052 | -2.20754 | 8.71E-05 | 0.000803 | 15    | 34    | 19    | 0   | 0   | 0  |
| Solyc08g077070.2.1 | 7.188014 | -2.15303 | 0.000101 | 0.000909 | 10    | 41    | 23    | 0   | 0   | 0  |
| Solyc06g068130.2.1 | 7.282249 | 4.104108 | 8.39E-05 | 0.000779 | 0     | 5540  | 2556  | 0   | 28  | 2  |
| Solyc07g045580.1.1 | 7.330384 | -2.04611 | 8.77E-05 | 0.000807 | 10    | 31    | 36    | 0   | 0   | 0  |
| Solyc12g036370.1.1 | 7.33351  | -2.04334 | 4.95E-05 | 0.000495 | 14    | 36    | 28    | 0   | 0   | 0  |
| Solyc01g008390.1.1 | 7.333593 | -2.09009 | 0.001388 | 0.008386 | 48    | 10    | 3     | 0   | 0   | 0  |
| Solyc05g005170.2.1 | 7.339495 | -2.09006 | 0.001683 | 0.009834 | 47    | 3     | 9     | 0   | 0   | 0  |
| Solyc03g113260.1.1 | 7.344111 | -2.04924 | 0.000353 | 0.002634 | 34    | 36    | 4     | 0   | 0   | 0  |
| Solyc07g043500.1.1 | 7.359935 | 4.965299 | 3.23E-08 | 7.84E-07 | 31    | 8999  | 5304  | 9   | 4   | 23 |
| Solyc12g044320.1.1 | 7.36061  | -2.0141  | 6.47E-05 | 0.000623 | 10    | 44    | 29    | 0   | 0   | 0  |
| Solyc12g040870.1.1 | 7.371649 | -1.96678 | 0.001009 | 0.006383 | 3     | 94    | 6     | 0   | 0   | 0  |
| Solyc03g078800.2.1 | 7.381763 | -1.99941 | 4.58E-05 | 0.000463 | 18    | 49    | 17    | 0   | 0   | 0  |
| Solyc02g085590.2.1 | 7.428552 | -1.92143 | 0.001304 | 0.007943 | 6     | 99    | 2     | 0   | 0   | 0  |
| Solyc11g071290.1.1 | 7.438188 | 2.928158 | 5.85E-24 | 1.50E-21 | 789   | 1037  | 1045  | 4   | 1   | 4  |
| Solyc02g072550.1.1 | 7.445111 | -1.9251  | 0.000404 | 0.002949 | 2     | 69    | 27    | 0   | 0   | 0  |
| Solyc06g008390.2.1 | 7.446479 | -1.9571  | 3.63E-05 | 0.000378 | 26    | 39    | 17    | 0   | 0   | 0  |
| Solyc07g049430.2.1 | 7.453747 | -1.97918 | 0.000343 | 0.002577 | 46    | 17    | 7     | 0   | 0   | 0  |
| Solyc06g066710.1.1 | 7.464416 | -1.9138  | 0.00012  | 0.001058 | 6     | 69    | 23    | 0   | 0   | 0  |
| Solyc09g065350.1.1 | 7.47942  | -1.95763 | 0.000268 | 0.00209  | 46    | 16    | 9     | 0   | 0   | 0  |
| Solyc11g020860.1.1 | 7.509589 | -1.90569 | 2.29E-05 | 0.000251 | 21    | 32    | 31    | 0   | 0   | 0  |
| NCRNA_5_310        | 7.539814 | -1.88593 | 3.58E-05 | 0.000374 | 33    | 35    | 16    | 0   | 0   | 0  |
| Solyc01g090800.2.1 | 7.555526 | -1.851   | 6.45E-05 | 0.000622 | 7     | 50    | 39    | 0   | 0   | 0  |
| Solyc12g038350.1.1 | 7.574725 | -1.84742 | 1.64E-05 | 0.000188 | 23    | 43    | 25    | 0   | 0   | 0  |
| Solyc01g091180.2.1 | 7.646232 | -1.77339 | 2.37E-05 | 0.000259 | 12    | 64    | 29    | 0   | 0   | 0  |
| Solyc10g021280.1.1 | 7.687097 | -1.74957 | 1.24E-05 | 0.000147 | 17    | 46    | 37    | 0   | 0   | 0  |
| Solyc06g068550.2.1 | 7.687739 | -1.74587 | 1.80E-05 | 0.000204 | 13    | 49    | 40    | 0   | 0   | 0  |
| Solyc05g009950.2.1 | 7.700017 | 1.032002 | 1.00E-10 | 4.25E-09 | 47    | 492   | 334   | 0   | 2   | 0  |
| Solyc10g054820.1.1 | 7.707515 | 0.26603  | 7.98E-11 | 3.43E-09 | 89    | 205   | 167   | 0   | 1   | 0  |
| Solyc01g095940.2.1 | 7.710902 | -1.72313 | 2.13E-05 | 0.000236 | 11    | 55    | 40    | 0   | 0   | 0  |
| Solyc09g090090.1.1 | 7.736936 | -1.70179 | 1.35E-05 | 0.000158 | 14    | 58    | 36    | 0   | 0   | 0  |

|                    |          |          |          |          |      |      |     |   |   |   |
|--------------------|----------|----------|----------|----------|------|------|-----|---|---|---|
| Solyc01g011230.2.1 | 7.810098 | -1.65922 | 1.07E-05 | 0.000129 | 39   | 35   | 25  | 0 | 0 | 0 |
| Solyc07g009450.1.1 | 7.87011  | -1.58554 | 0.001067 | 0.006689 | 0    | 49   | 68  | 0 | 0 | 0 |
| Solyc01g091870.2.1 | 7.883314 | -1.60657 | 5.01E-05 | 0.0005   | 57   | 30   | 11  | 0 | 0 | 0 |
| Solyc12g035400.1.1 | 7.953944 | -1.51455 | 4.53E-06 | 6.16E-05 | 21   | 80   | 28  | 0 | 0 | 0 |
| Solyc04g011870.1.1 | 7.961936 | -1.53586 | 0.000973 | 0.006191 | 62   | 46   | 0   | 0 | 0 | 0 |
| Solyc09g015030.1.1 | 8.015045 | -1.47822 | 3.73E-06 | 5.18E-05 | 43   | 50   | 25  | 0 | 0 | 0 |
| Solyc04g064610.2.1 | 8.072331 | 0.677786 | 1.85E-05 | 0.000209 | 430  | 12   | 14  | 1 | 0 | 0 |
| Solyc04g050730.2.1 | 8.15669  | 0.752381 | 4.04E-08 | 9.54E-07 | 387  | 60   | 66  | 1 | 0 | 0 |
| Solyc12g055970.1.1 | 8.165748 | -1.35717 | 6.81E-06 | 8.76E-05 | 62   | 31   | 26  | 0 | 0 | 0 |
| Solyc03g123580.2.1 | 8.202093 | -1.29479 | 7.34E-06 | 9.36E-05 | 9    | 92   | 55  | 0 | 0 | 0 |
| Solyc07g053900.2.1 | 8.266443 | -1.26524 | 2.77E-06 | 3.98E-05 | 62   | 37   | 31  | 0 | 0 | 0 |
| Solyc03g006880.2.1 | 8.271728 | -1.2258  | 0.000394 | 0.002887 | 0    | 110  | 61  | 0 | 0 | 0 |
| Solyc01g100910.2.1 | 8.282956 | -1.27307 | 0.001406 | 0.008482 | 101  | 12   | 0   | 0 | 0 | 0 |
| Solyc10g085280.1.1 | 8.317019 | -1.19534 | 3.40E-05 | 0.000359 | 3    | 81   | 80  | 0 | 0 | 0 |
| Solyc01g007800.2.1 | 8.34426  | -1.19675 | 2.86E-06 | 4.11E-05 | 56   | 24   | 54  | 0 | 0 | 0 |
| Solyc12g098590.1.1 | 8.349987 | 1.605981 | 5.03E-06 | 6.75E-05 | 0    | 1256 | 260 | 0 | 2 | 0 |
| Solyc01g007810.1.1 | 8.381475 | -1.17341 | 2.05E-05 | 0.000229 | 91   | 23   | 15  | 0 | 0 | 0 |
| Solyc12g088700.1.1 | 8.419512 | -1.11388 | 4.15E-07 | 7.61E-06 | 26   | 68   | 70  | 0 | 0 | 0 |
| Solyc02g032410.2.1 | 8.442988 | -1.08882 | 2.46E-07 | 4.80E-06 | 29   | 97   | 50  | 0 | 0 | 0 |
| Solyc01g079100.2.1 | 8.445287 | -1.09943 | 2.11E-06 | 3.16E-05 | 32   | 28   | 91  | 0 | 0 | 0 |
| Solyc08g067500.1.1 | 8.542333 | -0.97689 | 0.000281 | 0.002177 | 0    | 187  | 39  | 0 | 0 | 0 |
| Solyc08g078420.1.1 | 8.628384 | -0.92114 | 8.27E-06 | 0.000103 | 5    | 80   | 111 | 0 | 0 | 0 |
| Solyc05g005870.2.1 | 8.648469 | -0.94333 | 0.001522 | 0.009065 | 136  | 4    | 0   | 0 | 0 | 0 |
| Solyc06g082410.1.1 | 8.724208 | -0.83266 | 1.36E-07 | 2.80E-06 | 22   | 126  | 72  | 0 | 0 | 0 |
| Solyc01g108330.2.1 | 8.813801 | -0.75843 | 3.94E-08 | 9.35E-07 | 36   | 83   | 94  | 0 | 0 | 0 |
| Solyc02g079600.2.1 | 8.861966 | -0.71981 | 8.45E-07 | 1.42E-05 | 95   | 106  | 13  | 0 | 0 | 0 |
| Solyc03g026050.2.1 | 8.868397 | -0.70748 | 1.08E-07 | 2.29E-06 | 59   | 122  | 48  | 0 | 0 | 0 |
| Solyc02g077970.2.1 | 8.978379 | -0.57748 | 0.000329 | 0.002493 | 0    | 319  | 11  | 0 | 0 | 0 |
| Solyc11g007250.1.1 | 9.007438 | -0.58314 | 3.40E-08 | 8.19E-07 | 67   | 93   | 77  | 0 | 0 | 0 |
| Solyc07g014620.1.1 | 9.185455 | -0.40947 | 1.01E-07 | 2.16E-06 | 14   | 151  | 134 | 0 | 0 | 0 |
| Solyc08g078410.1.1 | 9.252813 | -0.35346 | 5.05E-06 | 6.77E-05 | 5    | 48   | 223 | 0 | 0 | 0 |
| Solyc12g009920.1.1 | 9.255529 | -0.3395  | 6.24E-07 | 1.09E-05 | 6    | 214  | 116 | 0 | 0 | 0 |
| Solyc03g025190.2.1 | 9.344746 | -0.25078 | 7.42E-07 | 1.27E-05 | 7    | 321  | 63  | 0 | 0 | 0 |
| Solyc08g069130.1.1 | 9.452605 | -0.18872 | 0.001444 | 0.00867  | 241  | 0    | 0   | 0 | 0 | 0 |
| Solyc09g091960.2.1 | 9.746763 | 0.119954 | 9.28E-09 | 2.59E-07 | 15   | 298  | 157 | 0 | 0 | 0 |
| Solyc06g072130.2.1 | 9.777692 | 0.162277 | 0.000149 | 0.001265 | 0    | 577  | 6   | 0 | 0 | 0 |
| Solyc12g044200.1.1 | 9.923299 | 0.281977 | 5.37E-10 | 1.93E-08 | 47   | 181  | 240 | 0 | 0 | 0 |
| Solyc01g090340.2.1 | 10.07776 | 0.438575 | 9.63E-08 | 2.07E-06 | 5    | 494  | 139 | 0 | 0 | 0 |
| Solyc01g107460.2.1 | 10.74814 | 1.08268  | 1.68E-10 | 6.73E-09 | 32   | 800  | 183 | 0 | 0 | 0 |
| Solyc12g088170.1.1 | 11.12209 | 1.448076 | 5.62E-07 | 9.94E-06 | 0    | 1069 | 269 | 0 | 0 | 0 |
| Solyc02g070970.1.1 | 12.15088 | 2.451585 | 1.04E-06 | 1.71E-05 | 1553 | 5    | 11  | 0 | 0 | 0 |

DE genes identified with pairwise correlation of *O. neolycopersici*- and mock-infected tomato leaf tissue.

| GeneID             | logFC    | logCPM   | PValue   | FDR      | ONm1  | ONm2  | ONm3 | ON1  | ON2  | ON3  |         |    |
|--------------------|----------|----------|----------|----------|-------|-------|------|------|------|------|---------|----|
| Solyc10g085800.1.1 | -7.73092 | -1.754   | 6.17E-06 | 0.007916 | 0     | 0     | 0    | 15   | 37   | 36   | ON up   | 1  |
| Solyc12g010170.1.1 | 1.429663 | 3.799572 | 8.25E-06 | 0.009689 | 976   | 1244  | 748  | 241  | 642  | 424  | ON down | 22 |
| Solyc12g005850.1.1 | 1.612131 | 6.924314 | 8.14E-09 | 2.74E-05 | 10244 | 9856  | 6463 | 2471 | 4154 | 3325 |         |    |
| Solyc06g053550.2.1 | 1.615667 | 7.433248 | 3.22E-06 | 0.004565 | 13413 | 16860 | 8085 | 2612 | 8710 | 3626 |         |    |
| Solyc01g095740.2.1 | 1.65864  | 5.507719 | 1.28E-10 | 6.91E-07 | 3567  | 3903  | 2583 | 918  | 1447 | 1257 |         |    |
| Solyc05g054660.1.1 | 1.683046 | 6.472682 | 7.77E-07 | 0.001308 | 8375  | 7250  | 4037 | 1900 | 3282 | 1724 |         |    |
| Solyc11g018740.1.1 | 1.773582 | 6.359719 | 1.09E-09 | 4.88E-06 | 6139  | 8657  | 3981 | 1160 | 2778 | 2528 |         |    |
| Solyc04g079430.2.1 | 1.897093 | 2.392105 | 6.00E-06 | 0.007916 | 290   | 607   | 325  | 73   | 158  | 149  |         |    |
| Solyc04g015970.2.1 | 1.979665 | 4.357257 | 3.46E-08 | 7.78E-05 | 1179  | 2731  | 1006 | 301  | 716  | 396  |         |    |
| Solyc04g074680.1.1 | 2.22707  | 3.036699 | 2.64E-07 | 0.000508 | 477   | 1175  | 385  | 92   | 172  | 232  |         |    |
| Solyc12g019980.1.1 | 2.233276 | 3.512992 | 1.73E-08 | 4.67E-05 | 968   | 1288  | 522  | 116  | 216  | 364  |         |    |
| Solyc02g037540.1.1 | 2.378996 | 3.01061  | 5.49E-09 | 2.11E-05 | 605   | 880   | 497  | 73   | 135  | 244  |         |    |
| Solyc01g095570.2.1 | 2.828918 | 7.259117 | 3.47E-08 | 7.78E-05 | 16831 | 20665 | 2742 | 1575 | 2814 | 1890 |         |    |
| Solyc03g112340.1.1 | 3.073511 | 2.690231 | 1.92E-06 | 0.002875 | 524   | 1103  | 130  | 86   | 63   | 55   |         |    |
| Solyc02g079950.2.1 | 3.309369 | 3.008074 | 2.23E-11 | 2.00E-07 | 893   | 1004  | 260  | 65   | 98   | 78   |         |    |
| Solyc09g005930.2.1 | 3.388209 | 1.59012  | 1.64E-08 | 4.67E-05 | 233   | 288   | 267  | 5    | 52   | 40   |         |    |
| Solyc06g011290.1.1 | 3.946297 | 1.639174 | 8.27E-06 | 0.009689 | 147   | 688   | 74   | 2    | 53   | 17   |         |    |
| Solyc12g005300.1.1 | 3.989107 | 2.102704 | 6.33E-07 | 0.001136 | 159   | 885   | 202  | 4    | 19   | 71   |         |    |
| NCRNA_9_267        | 4.683345 | 3.399859 | 1.69E-07 | 0.000351 | 1237  | 1725  | 104  | 46   | 69   | 7    |         |    |
| Solyc09g066490.2.1 | 4.868461 | 4.220067 | 2.41E-12 | 3.24E-08 | 1913  | 3387  | 204  | 56   | 65   | 79   |         |    |
| Solyc03g123740.2.1 | 5.227832 | 1.841789 | 7.53E-16 | 2.03E-11 | 320   | 562   | 157  | 9    | 15   | 6    |         |    |
| Solyc07g065640.2.1 | 8.723894 | 1.756516 | 2.96E-11 | 2.00E-07 | 341   | 668   | 18   | 2    | 0    | 0    |         |    |
| Solyc02g070770.2.1 | 9.632533 | -0.0238  | 1.02E-06 | 0.001615 | 97    | 194   | 1    | 0    | 0    | 0    |         |    |

DE genes identified with pairwise correlation of *P. infestans* - and mock-infected tomato leaf tissue.

| Gene ID            | logFC    | logCPM   | PValue   | FDR      | Pim1 | Pim2 | Pim3 | Pi1   | Pi2   | Pi3  |    |         |     |
|--------------------|----------|----------|----------|----------|------|------|------|-------|-------|------|----|---------|-----|
| Solyc07g062370.1.1 | -9.89317 | 0.441344 | 7.88E-09 | 1.53E-06 | 0    | 0    | 0    | 0     | 212   | 207  | 4  | Pi Up   | 661 |
| Solyc02g085800.1.1 | -9.86693 | 0.409334 | 1.92E-10 | 6.72E-08 | 0    | 0    | 0    | 0     | 257   | 115  | 16 | Pi Down | 49  |
| Solyc02g036240.1.1 | -9.40284 | -0.03971 | 8.02E-10 | 2.08E-07 | 0    | 0    | 0    | 0     | 176   | 27   | 57 |         |     |
| NCRNA_6_224        | -9.09401 | -0.33203 | 8.14E-05 | 0.003759 | 0    | 0    | 0    | 0     | 198   | 0    | 9  |         |     |
| Solyc07g052130.1.1 | -8.93315 | -0.44697 | 2.00E-08 | 3.54E-06 | 0    | 0    | 0    | 0     | 62    | 152  | 15 |         |     |
| Solyc07g052450.1.1 | -8.89471 | -0.48559 | 5.98E-09 | 1.19E-06 | 0    | 0    | 0    | 0     | 76    | 130  | 12 |         |     |
| Solyc09g066400.1.1 | -8.80407 | 1.506435 | 5.69E-09 | 1.15E-06 | 1    | 0    | 0    | 0     | 644   | 176  | 12 |         |     |
| Solyc08g080660.1.1 | -8.57545 | 3.598801 | 6.02E-09 | 1.19E-06 | 4    | 0    | 1    | 1     | 197   | 4455 | 60 |         |     |
| Solyc11g006240.1.1 | -8.43962 | -0.89771 | 6.51E-07 | 6.85E-05 | 0    | 0    | 0    | 0     | 65    | 87   | 5  |         |     |
| Solyc12g056180.1.1 | -8.36988 | -1.00463 | 8.32E-06 | 0.00059  | 0    | 0    | 0    | 0     | 79    | 4    | 40 |         |     |
| Solyc01g073860.2.1 | -8.23484 | -1.08203 | 3.40E-07 | 3.89E-05 | 0    | 0    | 0    | 0     | 54    | 73   | 8  |         |     |
| Solyc05g055270.1.1 | -8.05869 | -1.25418 | 7.74E-08 | 1.08E-05 | 0    | 0    | 0    | 0     | 34    | 47   | 31 |         |     |
| Solyc07g052370.2.1 | -7.95619 | 2.710651 | 2.82E-09 | 6.09E-07 | 4    | 0    | 0    | 0     | 421   | 1933 | 34 |         |     |
| Solyc03g096180.2.1 | -7.68816 | -1.55906 | 1.53E-06 | 0.000142 | 0    | 0    | 0    | 0     | 11    | 56   | 25 |         |     |
| Solyc04g083140.1.1 | -7.66002 | 0.427715 | 2.56E-07 | 3.09E-05 | 1    | 0    | 0    | 0     | 69    | 389  | 9  |         |     |
| Solyc01g094160.1.1 | -7.64665 | -1.5674  | 1.18E-05 | 0.000787 | 0    | 0    | 0    | 0     | 11    | 76   | 10 |         |     |
| Solyc03g031450.2.1 | -7.54358 | -1.66769 | 2.07E-05 | 0.00126  | 0    | 0    | 0    | 0     | 28    | 54   | 4  |         |     |
| Solyc02g090470.2.1 | -7.53213 | -1.67652 | 5.15E-06 | 0.00039  | 0    | 0    | 0    | 0     | 19    | 58   | 9  |         |     |
| Solyc01g097060.2.1 | -7.44254 | -1.7779  | 3.68E-06 | 0.00029  | 0    | 0    | 0    | 0     | 33    | 31   | 10 |         |     |
| Solyc05g014300.1.1 | -7.36235 | -1.83892 | 3.75E-05 | 0.002037 | 0    | 0    | 0    | 0     | 36    | 31   | 4  |         |     |
| Solyc02g086850.1.1 | -7.33505 | -1.86682 | 1.82E-06 | 0.000164 | 0    | 0    | 0    | 0     | 22    | 32   | 15 |         |     |
| Solyc03g098560.1.1 | -7.26424 | -1.90303 | 2.02E-05 | 0.001236 | 0    | 0    | 0    | 0     | 21    | 43   | 6  |         |     |
| Solyc09g014720.1.1 | -7.23025 | 0.572335 | 1.52E-10 | 5.38E-08 | 0    | 0    | 2    | 207   | 238   | 20   |    |         |     |
| Solyc07g061710.1.1 | -7.17636 | -1.99115 | 6.30E-06 | 0.000461 | 0    | 0    | 0    | 0     | 13    | 34   | 16 |         |     |
| Solyc02g080830.1.1 | -7.13765 | -2.00164 | 2.67E-05 | 0.001574 | 0    | 0    | 0    | 0     | 12    | 44   | 9  |         |     |
| Solyc07g049670.1.1 | -7.12866 | -2.03895 | 1.13E-05 | 0.000758 | 0    | 0    | 0    | 0     | 25    | 24   | 10 |         |     |
| Solyc03g005500.2.1 | -7.01867 | 1.746596 | 4.95E-23 | 7.84E-19 | 0    | 5    | 1    | 401   | 451   | 185  |    |         |     |
| Solyc04g011480.2.1 | -6.98186 | 2.069511 | 1.02E-17 | 1.64E-14 | 0    | 6    | 2    | 485   | 791   | 105  |    |         |     |
| Solyc11g008950.1.1 | -6.92061 | -2.16581 | 0.000129 | 0.005581 | 0    | 0    | 0    | 7     | 42    | 8    |    |         |     |
| Solyc08g080310.1.1 | -6.85872 | 0.710279 | 8.29E-13 | 4.96E-10 | 0    | 0    | 3    | 156   | 327   | 46   |    |         |     |
| Solyc05g055370.1.1 | -6.83121 | -2.2536  | 7.47E-05 | 0.003492 | 0    | 0    | 0    | 15    | 30    | 6    |    |         |     |
| NCRNA_6_5          | -6.82425 | -2.25815 | 0.000135 | 0.005812 | 0    | 0    | 0    | 5     | 33    | 13   |    |         |     |
| Solyc01g008610.2.1 | -6.81863 | -0.56347 | 7.75E-08 | 1.08E-05 | 0    | 1    | 0    | 100   | 82    | 12   |    |         |     |
| Solyc12g015700.1.1 | -6.7492  | -2.32719 | 5.43E-05 | 0.002693 | 0    | 0    | 0    | 10    | 26    | 11   |    |         |     |
| Solyc08g013920.2.1 | -6.72307 | -2.33942 | 0.000104 | 0.004677 | 0    | 0    | 0    | 14    | 27    | 6    |    |         |     |
| Solyc06g075100.2.1 | -6.62565 | 1.35053  | 1.83E-16 | 2.38E-13 | 0    | 6    | 0    | 344   | 318   | 115  |    |         |     |
| Solyc09g014460.1.1 | -6.58449 | -2.45951 | 0.000115 | 0.0051   | 0    | 0    | 0    | 15    | 19    | 7    |    |         |     |
| Solyc03g044180.1.1 | -6.55944 | 3.096492 | 1.70E-20 | 5.78E-17 | 8    | 5    | 5    | 1028  | 1469  | 280  |    |         |     |
| Solyc03g118000.1.1 | -6.4786  | 3.087065 | 2.78E-19 | 7.58E-16 | 8    | 8    | 3    | 1133  | 1323  | 263  |    |         |     |
| Solyc01g087960.1.1 | -6.43716 | -0.18287 | 3.84E-08 | 6.08E-06 | 0    | 2    | 0    | 132   | 113   | 14   |    |         |     |
| Solyc10g054350.1.1 | -6.30946 | -0.32562 | 2.35E-06 | 0.0002   | 0    | 1    | 1    | 173   | 18    | 19   |    |         |     |
| Solyc06g061210.2.1 | -6.29896 | 1.364497 | 3.62E-09 | 7.70E-07 | 0    | 8    | 0    | 260   | 577   | 28   |    |         |     |
| Solyc07g056100.1.1 | -5.99646 | -0.57595 | 6.23E-09 | 1.22E-06 | 0    | 2    | 0    | 73    | 93    | 27   |    |         |     |
| Solyc02g067600.1.1 | -5.95822 | -0.32801 | 7.30E-07 | 7.53E-05 | 2    | 0    | 0    | 61    | 162   | 22   |    |         |     |
| Solyc04g012100.1.1 | -5.78685 | -1.46717 | 3.07E-06 | 0.00025  | 0    | 0    | 1    | 38    | 46    | 12   |    |         |     |
| Solyc01g087280.1.1 | -5.60097 | 0.223055 | 7.36E-08 | 1.05E-05 | 1    | 4    | 0    | 219   | 56    | 43   |    |         |     |
| Solyc11g065910.1.1 | -5.5454  | -1.66109 | 1.54E-05 | 0.000973 | 0    | 1    | 0    | 20    | 54    | 11   |    |         |     |
| Solyc11g069560.1.1 | -5.47644 | 2.13741  | 3.51E-07 | 3.97E-05 | 0    | 27   | 0    | 581   | 748   | 82   |    |         |     |
| Solyc02g081370.2.1 | -5.45028 | 0.574576 | 3.72E-10 | 1.11E-07 | 2    | 0    | 5    | 150   | 82    | 169  |    |         |     |
| Solyc02g077570.1.1 | -5.42169 | -0.07764 | 9.09E-07 | 8.97E-05 | 2    | 2    | 0    | 167   | 66    | 27   |    |         |     |
| Solyc08g023510.1.1 | -5.3722  | 4.48723  | 2.48E-10 | 7.94E-08 | 23   | 96   | 4    | 2003  | 5050  | 570  |    |         |     |
| Solyc11g072920.1.1 | -5.30264 | -0.16893 | 1.30E-05 | 0.000852 | 0    | 5    | 0    | 118   | 142   | 7    |    |         |     |
| Solyc02g089920.1.1 | -5.28205 | -0.77709 | 4.81E-07 | 5.28E-05 | 0    | 1    | 2    | 86    | 34    | 32   |    |         |     |
| Solyc02g036220.1.1 | -5.27245 | 0.203607 | 2.21E-06 | 0.00019  | 0    | 7    | 0    | 226   | 65    | 26   |    |         |     |
| Solyc02g068460.1.1 | -5.26455 | -0.21988 | 9.56E-06 | 0.000659 | 0    | 5    | 0    | 169   | 34    | 25   |    |         |     |
| Solyc04g011750.2.1 | -5.26338 | -0.3406  | 2.79E-05 | 0.001619 | 3    | 0    | 0    | 79    | 141   | 16   |    |         |     |
| Solyc08g029000.2.1 | -5.25931 | 7.739473 | 2.19E-08 | 3.78E-06 | 262  | 910  | 50   | 15455 | 57017 | 3172 |    |         |     |
| Solyc09g066350.1.1 | -5.25142 | -1.23327 | 5.28E-05 | 0.002643 | 0    | 0    | 2    | 45    | 69    | 5    |    |         |     |
| Solyc04g079260.2.1 | -5.2332  | 4.46999  | 2.39E-11 | 1.12E-08 | 26   | 102  | 4    | 1925  | 4482  | 922  |    |         |     |
| Solyc07g056610.1.1 | -5.10268 | -1.36305 | 4.14E-05 | 0.002179 | 0    | 2    | 0    | 9     | 73    | 26   |    |         |     |
| Solyc07g040710.2.1 | -5.05871 | 3.755863 | 2.75E-12 | 1.56E-09 | 7    | 91   | 8    | 1630  | 2067  | 555  |    |         |     |
| Solyc10g050880.1.1 | -5.02984 | 3.816082 | 6.44E-22 | 3.51E-18 | 20   | 26   | 49   | 1775  | 2122  | 526  |    |         |     |
| Solyc08g007090.1.1 | -4.9973  | -0.70711 | 2.63E-05 | 0.001556 | 0    | 4    | 0    | 89    | 73    | 9    |    |         |     |
| Solyc10g079320.1.1 | -4.96652 | 1.192701 | 1.96E-06 | 0.000174 | 6    | 4    | 3    | 334   | 22    | 235  |    |         |     |
| Solyc04g025530.2.1 | -4.93945 | 5.445416 | 2.21E-21 | 1.00E-17 | 29   | 257  | 83   | 4584  | 7523  | 1873 |    |         |     |
| Solyc03g005520.1.1 | -4.93008 | -0.17556 | 1.01E-06 | 9.88E-05 | 3    | 0    | 2    | 99    | 126   | 31   |    |         |     |
| Solyc01g107400.2.1 | -4.92972 | -0.49495 | 6.14E-06 | 0.000454 | 0    | 3    | 2    | 110   | 79    | 10   |    |         |     |
| Solyc10g018340.1.1 | -4.88057 | 2.590114 | 1.80E-09 | 4.21E-07 | 2    | 49   | 3    | 696   | 987   | 217  |    |         |     |
| Solyc02g062300.2.1 | -4.83545 | 3.278303 | 1.28E-06 | 0.000121 | 19   | 28   | 21   | 462   | 3035  | 31   |    |         |     |
| Solyc10g076240.1.1 | -4.82207 | 2.431197 | 2.77E-06 | 0.00023  | 18   | 0    | 10   | 677   | 966   | 85   |    |         |     |
| Solyc09g013150.2.1 | -4.79992 | 4.112897 | 1.01E-22 | 9.17E-19 | 21   | 55   | 70   | 2267  | 2559  | 584  |    |         |     |
| Solyc10g076370.1.1 | -4.79831 | -0.24453 | 5.05E-05 | 0.002556 | 0    | 7    | 0    | 167   | 39    | 18   |    |         |     |
| Solyc01g095080.2.1 | -4.76606 | 4.123513 | 4.01E-07 | 4.48E-05 | 1    | 173  | 12   | 2081  | 2657  | 720  |    |         |     |
| Solyc07g052140.2.1 | -4.75209 | 4.237827 | 0.000192 | 0.007755 | 42   | 9    | 82   | 683   | 6310  | 12   |    |         |     |
| Solyc05g050350.1.1 | -4.73323 | 5.521222 | 5.76E-23 | 7.84E-19 | 79   | 210  | 88   | 4868  | 8131  | 1752 |    |         |     |
| Solyc02g087070.2.1 | -4.72693 | 4.827691 | 5.28E-20 | 1.60E-16 | 35   | 122  | 98   | 3233  | 5269  | 721  |    |         |     |
| Solyc09g098010.2.1 | -4.70936 | -1.13333 | 2.92E-05 | 0.001675 | 1    | 0    | 2    | 18    | 81    | 28   |    |         |     |
| Solyc11g072930.1.1 | -4.70897 | 1.321983 | 5.37E-09 | 1.09E-06 | 6    | 10   | 3    | 410   | 257   | 63   |    |         |     |
| Solyc06g068900.2.1 | -4.67419 | 0.499115 | 9.10E-05 | 0.004159 | 0    | 14   | 0    | 295   | 66    | 24   |    |         |     |

|                    |          |          |          |          |     |      |     |       |       |      |
|--------------------|----------|----------|----------|----------|-----|------|-----|-------|-------|------|
| Solyc01g106510.2.1 | -4.66775 | -0.03166 | 3.77E-05 | 0.00204  | 0   | 0    | 9   | 182   | 63    | 21   |
| Solyc09g009980.1.1 | -4.65471 | 0.243849 | 2.02E-07 | 2.50E-05 | 0   | 2    | 9   | 162   | 150   | 33   |
| Solyc02g094270.1.1 | -4.64589 | -1.31045 | 5.29E-05 | 0.002643 | 0   | 3    | 0   | 22    | 77    | 14   |
| Solyc02g068470.1.1 | -4.64104 | 1.433482 | 5.40E-08 | 8.11E-06 | 8   | 8    | 4   | 451   | 294   | 50   |
| Solyc07g052120.2.1 | -4.64079 | 2.301432 | 3.27E-08 | 5.24E-06 | 4   | 40   | 5   | 506   | 1042  | 74   |
| Solyc04g064880.2.1 | -4.61835 | 7.034537 | 5.57E-05 | 0.002756 | 179 | 1094 | 2   | 15169 | 22702 | 4124 |
| Solyc03g005040.1.1 | -4.57603 | 1.229278 | 6.05E-10 | 1.65E-07 | 1   | 19   | 4   | 322   | 282   | 89   |
| Solyc05g012660.1.1 | -4.57007 | 2.433987 | 2.78E-14 | 2.61E-11 | 9   | 32   | 10  | 697   | 748   | 203  |
| Solyc02g080090.1.1 | -4.54591 | 0.176251 | 6.63E-08 | 9.66E-06 | 2   | 7    | 1   | 123   | 176   | 36   |
| Solyc08g078650.2.1 | -4.53467 | 5.247909 | 1.18E-11 | 5.97E-09 | 95  | 196  | 30  | 5867  | 4019  | 1452 |
| Solyc01g073800.2.1 | -4.48614 | -0.66593 | 5.21E-05 | 0.00262  | 0   | 6    | 0   | 35    | 141   | 15   |
| Solyc02g068670.1.1 | -4.4328  | 2.330804 | 7.93E-18 | 1.54E-14 | 6   | 31   | 18  | 425   | 872   | 275  |
| Solyc09g011540.2.1 | -4.4225  | 1.687635 | 2.81E-09 | 6.09E-07 | 2   | 9    | 26  | 503   | 378   | 76   |
| Solyc07g039570.2.1 | -4.41394 | 2.274891 | 2.03E-08 | 3.57E-06 | 10  | 37   | 2   | 405   | 1016  | 151  |
| Solyc11g005840.1.1 | -4.40249 | 2.794592 | 1.01E-17 | 1.64E-14 | 16  | 29   | 25  | 372   | 1305  | 510  |
| Solyc04g040130.1.1 | -4.3915  | 4.985111 | 1.41E-20 | 5.49E-17 | 50  | 220  | 85  | 2288  | 6558  | 1493 |
| Solyc07g056210.2.1 | -4.36304 | 5.028728 | 1.02E-17 | 1.64E-14 | 62  | 217  | 79  | 4134  | 4955  | 1070 |
| Solyc07g051950.2.1 | -4.32732 | 0.932409 | 3.51E-07 | 3.97E-05 | 2   | 18   | 2   | 158   | 409   | 43   |
| Solyc03g096190.1.1 | -4.32092 | 1.791438 | 1.49E-09 | 3.68E-07 | 6   | 29   | 4   | 461   | 467   | 112  |
| Solyc03g121190.2.1 | -4.31873 | 1.353355 | 1.51E-09 | 3.71E-07 | 6   | 19   | 2   | 295   | 359   | 109  |
| Solyc04g054950.2.1 | -4.29643 | 2.857955 | 1.97E-08 | 3.50E-06 | 26  | 9    | 30  | 566   | 1680  | 164  |
| Solyc02g020030.1.1 | -4.27562 | -0.00752 | 0.000157 | 0.00651  | 0   | 3    | 9   | 53    | 263   | 7    |
| Solyc11g007470.1.1 | -4.25876 | 1.777585 | 2.05E-07 | 2.51E-05 | 13  | 19   | 0   | 446   | 375   | 173  |
| Solyc02g071820.2.1 | -4.24837 | 6.543774 | 4.60E-13 | 3.13E-10 | 326 | 342  | 200 | 7517  | 19691 | 3386 |
| Solyc03g019690.1.1 | -4.19098 | -1.38124 | 0.000116 | 0.00514  | 0   | 4    | 0   | 22    | 63    | 18   |
| Solyc01g080570.2.1 | -4.18508 | 4.225948 | 5.89E-10 | 1.62E-07 | 68  | 105  | 12  | 1547  | 3185  | 1100 |
| Solyc03g115060.2.1 | -4.14322 | 5.575075 | 8.26E-17 | 1.12E-13 | 75  | 430  | 149 | 4650  | 8925  | 1670 |
| Solyc04g072070.2.1 | -4.12554 | 5.017745 | 5.47E-11 | 2.33E-08 | 50  | 362  | 41  | 3526  | 5229  | 1323 |
| Solyc11g072140.1.1 | -4.12482 | 0.036797 | 6.84E-07 | 7.16E-05 | 1   | 12   | 0   | 76    | 141   | 74   |
| Solyc08g078170.1.1 | -4.12467 | -1.1767  | 9.41E-06 | 0.00065  | 0   | 2    | 3   | 42    | 53    | 21   |
| Solyc11g007390.1.1 | -4.11468 | 2.846812 | 4.41E-09 | 9.16E-07 | 33  | 28   | 7   | 904   | 724   | 443  |
| Solyc08g068660.1.1 | -4.10883 | -1.09292 | 5.74E-05 | 0.002827 | 1   | 1    | 3   | 59    | 52    | 12   |
| Solyc08g068630.2.1 | -4.08421 | -0.26148 | 5.87E-07 | 6.32E-05 | 0   | 6    | 5   | 86    | 121   | 31   |
| Solyc02g077520.2.1 | -4.07426 | -0.72474 | 0.000229 | 0.008968 | 1   | 6    | 0   | 24    | 142   | 16   |
| Solyc06g068890.1.1 | -4.04977 | -0.58617 | 0.000199 | 0.007986 | 0   | 9    | 0   | 89    | 77    | 16   |
| Solyc10g078220.1.1 | -4.04842 | 4.804745 | 0.000174 | 0.007133 | 8   | 463  | 7   | 1362  | 7192  | 935  |
| Solyc11g007500.1.1 | -4.03672 | 3.370752 | 4.89E-13 | 3.25E-10 | 16  | 112  | 24  | 1287  | 1244  | 527  |
| Solyc07g056080.1.1 | -3.98664 | 3.249347 | 1.88E-17 | 2.70E-14 | 17  | 93   | 31  | 880   | 1349  | 622  |
| Solyc11g067000.1.1 | -3.97896 | -0.30451 | 0.000147 | 0.006168 | 0   | 12   | 0   | 122   | 63    | 30   |
| Solyc12g045020.1.1 | -3.97467 | 3.240793 | 6.01E-09 | 1.19E-06 | 16  | 117  | 11  | 1039  | 1505  | 363  |
| Solyc12g009110.1.1 | -3.96165 | 1.511825 | 5.41E-07 | 5.88E-05 | 4   | 5    | 34  | 255   | 98    | 380  |
| Solyc01g098370.1.1 | -3.94925 | 0.53543  | 1.39E-08 | 2.59E-06 | 2   | 15   | 4   | 176   | 146   | 81   |
| Solyc05g015850.2.1 | -3.93252 | 4.980049 | 1.34E-09 | 3.34E-07 | 77  | 357  | 30  | 3045  | 5334  | 1429 |
| Solyc02g092890.1.1 | -3.92893 | 3.334328 | 2.25E-18 | 5.10E-15 | 31  | 53   | 55  | 1139  | 1375  | 500  |
| Solyc09g098080.2.1 | -3.90607 | 5.270326 | 9.21E-06 | 0.00064  | 11  | 675  | 41  | 5103  | 4252  | 1938 |
| Solyc07g062480.1.1 | -3.90578 | 0.559433 | 2.18E-05 | 0.001315 | 8   | 3    | 5   | 138   | 287   | 26   |
| Solyc02g079890.1.1 | -3.9054  | 5.172334 | 3.56E-06 | 0.000283 | 195 | 33   | 125 | 2404  | 1238  | 5684 |
| Solyc06g034370.1.1 | -3.87708 | -0.37035 | 9.20E-07 | 9.05E-05 | 1   | 7    | 3   | 56    | 128   | 37   |
| Solyc07g005110.2.1 | -3.87178 | 3.36809  | 2.44E-07 | 2.95E-05 | 23  | 132  | 7   | 1272  | 1480  | 367  |
| Solyc01g073830.1.1 | -3.86564 | -0.73484 | 4.57E-05 | 0.002365 | 3   | 2    | 2   | 35    | 107   | 27   |
| Solyc01g109140.2.1 | -3.85883 | 4.180731 | 1.72E-05 | 0.001075 | 59  | 183  | 15  | 1372  | 4611  | 156  |
| Solyc08g068710.1.1 | -3.85157 | 4.718161 | 1.56E-13 | 1.21E-10 | 45  | 202  | 195 | 2722  | 5068  | 609  |
| Solyc07g063730.1.1 | -3.84424 | 3.889629 | 5.25E-11 | 2.27E-08 | 28  | 184  | 34  | 1501  | 2550  | 555  |
| Solyc03g120260.2.1 | -3.82775 | 5.671714 | 6.23E-22 | 3.51E-18 | 183 | 281  | 253 | 4375  | 8927  | 2552 |
| Solyc08g078180.1.1 | -3.82599 | 2.208523 | 5.66E-08 | 8.43E-06 | 8   | 63   | 6   | 421   | 823   | 184  |
| Solyc08g006740.2.1 | -3.82232 | 4.72071  | 3.96E-14 | 3.60E-11 | 55  | 272  | 111 | 3314  | 3961  | 779  |
| Solyc04g079240.2.1 | -3.82122 | 0.999378 | 1.21E-05 | 0.0008   | 5   | 13   | 12  | 27    | 552   | 82   |
| Solyc06g066590.2.1 | -3.81429 | 3.539183 | 6.12E-07 | 6.49E-05 | 15  | 182  | 12  | 1256  | 1977  | 371  |
| Solyc03g098670.1.1 | -3.79332 | 0.844225 | 6.99E-05 | 0.003307 | 1   | 31   | 0   | 174   | 302   | 62   |
| Solyc05g009120.2.1 | -3.78513 | 3.625855 | 3.26E-18 | 6.82E-15 | 34  | 94   | 69  | 1163  | 2077  | 558  |
| Solyc02g077290.1.1 | -3.7772  | 3.449558 | 5.24E-09 | 1.07E-06 | 26  | 139  | 17  | 1436  | 1393  | 407  |
| Solyc07g008120.2.1 | -3.76446 | -0.03193 | 4.78E-06 | 0.000365 | 1   | 14   | 1   | 106   | 103   | 57   |
| Solyc02g067700.1.1 | -3.75765 | 0.625203 | 5.46E-06 | 0.000406 | 7   | 6    | 8   | 241   | 156   | 33   |
| Solyc05g010020.2.1 | -3.73452 | 4.431066 | 1.60E-09 | 3.84E-07 | 64  | 262  | 27  | 2115  | 3503  | 984  |
| Solyc06g069650.2.1 | -3.72862 | 0.511391 | 2.42E-06 | 0.000206 | 1   | 6    | 18  | 106   | 295   | 38   |
| Solyc07g018200.1.1 | -3.71116 | 3.22912  | 8.88E-11 | 3.56E-08 | 31  | 98   | 22  | 1116  | 1305  | 374  |
| Solyc08g068680.2.1 | -3.70642 | 6.0651   | 1.02E-12 | 5.93E-10 | 119 | 950  | 193 | 7317  | 9347  | 3366 |
| Solyc01g009320.1.1 | -3.70517 | -0.41491 | 5.22E-05 | 0.002621 | 1   | 0    | 11  | 53    | 126   | 34   |
| Solyc03g115610.2.1 | -3.68474 | 5.052435 | 7.69E-19 | 1.90E-15 | 89  | 332  | 160 | 3822  | 4760  | 1391 |
| Solyc12g088000.1.1 | -3.68297 | -1.44037 | 0.000252 | 0.009666 | 1   | 0    | 4   | 20    | 52    | 22   |
| Solyc09g075820.2.1 | -3.68217 | 7.090041 | 1.39E-15 | 1.58E-12 | 413 | 1425 | 478 | 15309 | 20376 | 5583 |
| Solyc02g070090.1.1 | -3.65745 | 2.259051 | 1.93E-07 | 2.41E-05 | 5   | 64   | 26  | 677   | 658   | 89   |
| Solyc11g007450.1.1 | -3.6543  | 0.637143 | 1.71E-08 | 3.08E-06 | 2   | 11   | 15  | 199   | 145   | 82   |
| Solyc12g049030.1.1 | -3.62328 | 5.853654 | 7.97E-07 | 8.01E-05 | 113 | 980  | 52  | 5258  | 10493 | 2269 |
| Solyc03g093890.2.1 | -3.61677 | 4.326778 | 2.97E-13 | 2.25E-10 | 81  | 189  | 57  | 2248  | 2805  | 918  |
| Solyc09g011330.1.1 | -3.60239 | 4.379799 | 4.82E-10 | 1.35E-07 | 58  | 285  | 43  | 1687  | 3919  | 895  |
| Solyc02g092120.2.1 | -3.59468 | 2.484837 | 4.57E-10 | 1.31E-07 | 14  | 78   | 13  | 541   | 779   | 323  |
| Solyc10g083290.1.1 | -3.57851 | 6.189465 | 1.44E-13 | 1.15E-10 | 256 | 806  | 230 | 7908  | 11248 | 2941 |
| Solyc12g096960.1.1 | -3.55744 | 3.401767 | 5.60E-10 | 1.56E-07 | 39  | 123  | 25  | 928   | 1882  | 441  |
| Solyc01g009480.2.1 | -3.55419 | 0.01198  | 4.11E-06 | 0.00032  | 0   | 11   | 9   | 125   | 106   | 43   |
| Solyc12g006840.1.1 | -3.54059 | 4.727635 | 5.55E-16 | 6.57E-13 | 74  | 315  | 126 | 2396  | 4619  | 1133 |
| Solyc05g046110.2.1 | -3.53707 | -0.44879 | 0.000238 | 0.009242 | 4   | 7    | 0   | 97    | 54    | 36   |
| Solyc03g043900.1.1 | -3.47692 | 1.679531 | 7.76E-07 | 7.89E-05 | 7   | 52   | 7   | 359   | 483   | 104  |

|                    |          |          |          |          |     |      |      |       |       |      |
|--------------------|----------|----------|----------|----------|-----|------|------|-------|-------|------|
| Solyc07g066550.2.1 | -3.47562 | 3.056167 | 9.01E-12 | 4.63E-09 | 26  | 91   | 47   | 669   | 1604  | 312  |
| Solyc05g055030.1.1 | -3.47209 | 1.165584 | 2.69E-07 | 3.22E-05 | 4   | 9    | 33   | 203   | 392   | 77   |
| Solyc05g008220.2.1 | -3.46702 | 3.442557 | 8.09E-11 | 3.29E-08 | 50  | 87   | 55   | 1437  | 1398  | 346  |
| Solyc01g103650.2.1 | -3.44908 | 6.238386 | 2.75E-16 | 3.40E-13 | 289 | 657  | 499  | 5458  | 15254 | 3081 |
| Solyc07g048070.2.1 | -3.43712 | 5.456882 | 1.19E-10 | 4.37E-08 | 58  | 804  | 180  | 4298  | 5932  | 2635 |
| Solyc01g005160.2.1 | -3.42852 | 0.084369 | 2.99E-05 | 0.001701 | 1   | 3    | 18   | 44    | 197   | 67   |
| Solyc03g034360.2.1 | -3.42617 | 3.97173  | 5.58E-13 | 3.62E-10 | 34  | 248  | 66   | 1218  | 2376  | 1052 |
| Solyc02g064830.2.1 | -3.42141 | 4.247167 | 2.96E-15 | 3.22E-12 | 43  | 278  | 99   | 2156  | 2053  | 1182 |
| Solyc12g017700.1.1 | -3.41198 | 0.923271 | 4.58E-05 | 0.002365 | 5   | 24   | 10   | 367   | 93    | 38   |
| Solyc02g091070.2.1 | -3.40814 | 2.974638 | 2.23E-08 | 3.82E-06 | 22  | 87   | 58   | 1032  | 1187  | 135  |
| Solyc09g011870.1.1 | -3.40028 | 7.163588 | 1.14E-08 | 2.16E-06 | 943 | 376  | 836  | 14308 | 23214 | 5855 |
| Solyc01g006950.2.1 | -3.39727 | 5.751446 | 1.55E-11 | 7.55E-09 | 189 | 775  | 147  | 5693  | 7667  | 2571 |
| Solyc06g062920.2.1 | -3.39626 | 3.694802 | 8.18E-08 | 1.14E-05 | 18  | 259  | 34   | 1069  | 2082  | 725  |
| Solyc08g074680.2.1 | -3.39406 | 4.794609 | 3.28E-06 | 0.000265 | 209 | 62   | 106  | 4066  | 3178  | 776  |
| Solyc11g044840.1.1 | -3.39285 | 5.256059 | 5.22E-08 | 7.90E-06 | 173 | 493  | 57   | 4413  | 5476  | 1452 |
| Solyc01g008690.2.1 | -3.38752 | 1.884926 | 1.61E-07 | 2.06E-05 | 19  | 37   | 11   | 497   | 413   | 133  |
| Solyc04g072620.1.1 | -3.35446 | 1.218661 | 2.38E-05 | 0.001424 | 1   | 25   | 31   | 411   | 157   | 57   |
| Solyc02g079530.2.1 | -3.34301 | 2.948855 | 1.97E-09 | 4.44E-07 | 14  | 127  | 43   | 939   | 1009  | 295  |
| Solyc10g086710.1.1 | -3.33253 | 2.592404 | 1.13E-10 | 4.22E-08 | 24  | 59   | 42   | 808   | 681   | 224  |
| Solyc05g007110.2.1 | -3.32834 | 0.683755 | 1.09E-05 | 0.000735 | 12  | 5    | 9    | 140   | 251   | 69   |
| Solyc10g076510.1.1 | -3.32656 | 6.600315 | 5.48E-12 | 2.87E-09 | 484 | 902  | 477  | 11543 | 14225 | 3113 |
| Solyc05g054380.1.1 | -3.32015 | 4.97216  | 2.62E-09 | 5.79E-07 | 205 | 146  | 172  | 3301  | 5193  | 1004 |
| Solyc10g055820.1.1 | -3.31965 | 1.93381  | 6.47E-08 | 9.48E-06 | 8   | 64   | 17   | 312   | 696   | 148  |
| Solyc07g008620.1.1 | -3.31375 | 4.956735 | 1.37E-17 | 2.08E-14 | 151 | 290  | 173  | 2889  | 4597  | 1675 |
| Solyc02g065090.2.1 | -3.3126  | 0.50025  | 0.000202 | 0.008066 | 4   | 21   | 5    | 43    | 374   | 33   |
| Solyc12g008670.1.1 | -3.30601 | -0.76058 | 0.000167 | 0.006891 | 0   | 8    | 5    | 80    | 35    | 30   |
| Solyc03g112030.1.1 | -3.30558 | 0.84551  | 1.75E-07 | 2.22E-05 | 7   | 16   | 14   | 159   | 304   | 63   |
| Solyc05g014590.2.1 | -3.29734 | 2.181347 | 6.75E-05 | 0.003232 | 40  | 14   | 8    | 554   | 609   | 147  |
| Solyc03g116700.2.1 | -3.29335 | 7.278339 | 1.42E-08 | 2.63E-06 | 318 | 3085 | 490  | 16440 | 23252 | 6447 |
| Solyc03g007200.1.1 | -3.29246 | 0.732638 | 1.40E-06 | 0.000132 | 9   | 10   | 13   | 163   | 88    | 168  |
| Solyc05g052680.1.1 | -3.28498 | 3.005845 | 0.000159 | 0.006584 | 46  | 1    | 101  | 684   | 1210  | 461  |
| Solyc03g043700.2.1 | -3.27778 | 3.22367  | 4.58E-14 | 3.90E-11 | 27  | 76   | 114  | 776   | 1554  | 464  |
| Solyc08g021880.1.1 | -3.27771 | 0.49976  | 3.47E-05 | 0.001913 | 4   | 22   | 5    | 167   | 207   | 29   |
| Solyc02g092860.2.1 | -3.26295 | 4.524064 | 1.17E-14 | 1.18E-11 | 106 | 245  | 134  | 2622  | 3130  | 959  |
| Solyc05g052670.1.1 | -3.26219 | 5.964935 | 4.30E-06 | 0.000334 | 264 | 57   | 1020 | 4530  | 11854 | 2853 |
| Solyc05g008210.2.1 | -3.25438 | 2.707591 | 8.32E-09 | 1.60E-06 | 30  | 64   | 44   | 751   | 1028  | 163  |
| Solyc03g113120.2.1 | -3.25283 | -1.5184  | 0.000259 | 0.009953 | 0   | 5    | 2    | 24    | 37    | 23   |
| Solyc12g100270.1.1 | -3.24948 | 3.40418  | 1.51E-08 | 2.76E-06 | 38  | 155  | 49   | 715   | 2293  | 332  |
| Solyc05g053150.1.1 | -3.23429 | 5.115489 | 4.06E-11 | 1.81E-08 | 176 | 336  | 207  | 5411  | 2170  | 1737 |
| Solyc10g083690.2.1 | -3.23411 | 5.485248 | 5.43E-07 | 5.88E-05 | 245 | 472  | 180  | 5389  | 7709  | 585  |
| Solyc02g092870.1.1 | -3.22881 | 1.285715 | 0.000154 | 0.006448 | 18  | 16   | 8    | 410   | 219   | 37   |
| Solyc04g072000.2.1 | -3.22745 | 4.954733 | 7.09E-10 | 1.88E-07 | 42  | 557  | 245  | 2528  | 5683  | 1270 |
| Solyc01g007960.2.1 | -3.21299 | 3.834394 | 2.07E-09 | 4.63E-07 | 53  | 230  | 51   | 1399  | 2314  | 546  |
| Solyc06g076910.1.1 | -3.20741 | 0.047233 | 2.91E-05 | 0.001675 | 0   | 14   | 12   | 90    | 162   | 39   |
| Solyc12g100260.1.1 | -3.20502 | 3.459261 | 3.95E-06 | 0.000309 | 22  | 239  | 29   | 511   | 2460  | 500  |
| Solyc04g058170.1.1 | -3.18817 | 2.519798 | 3.40E-07 | 3.89E-05 | 17  | 107  | 18   | 689   | 759   | 202  |
| Solyc01g108360.2.1 | -3.18601 | 0.804791 | 2.62E-07 | 3.14E-05 | 6   | 9    | 25   | 132   | 280   | 89   |
| Solyc11g006030.1.1 | -3.18562 | 3.508588 | 7.05E-13 | 4.36E-10 | 37  | 153  | 89   | 914   | 2019  | 501  |
| Solyc11g007490.1.1 | -3.1815  | 3.032311 | 2.36E-10 | 7.75E-08 | 35  | 97   | 56   | 1024  | 1043  | 281  |
| Solyc12g088390.1.1 | -3.17847 | 3.350542 | 7.63E-07 | 7.79E-05 | 60  | 94   | 54   | 1017  | 1963  | 166  |
| Solyc01g096720.2.1 | -3.16708 | 2.94808  | 5.23E-06 | 0.000393 | 46  | 68   | 44   | 1447  | 431   | 179  |
| Solyc01g105630.2.1 | -3.16281 | 2.359647 | 6.22E-11 | 2.61E-08 | 10  | 78   | 47   | 350   | 796   | 346  |
| Solyc03g119660.1.1 | -3.15047 | 1.913835 | 3.05E-07 | 3.56E-05 | 20  | 18   | 44   | 462   | 501   | 113  |
| Solyc07g042430.1.1 | -3.14532 | 1.514305 | 3.47E-05 | 0.001913 | 0   | 44   | 39   | 227   | 508   | 113  |
| Solyc05g008640.1.1 | -3.14481 | 2.586451 | 2.66E-06 | 0.000222 | 40  | 31   | 48   | 1031  | 392   | 183  |
| Solyc08g067610.2.1 | -3.13668 | 5.073129 | 8.38E-13 | 4.96E-10 | 92  | 572  | 231  | 2523  | 6167  | 1532 |
| Solyc01g009810.2.1 | -3.13439 | 3.682975 | 3.94E-05 | 0.002108 | 22  | 322  | 20   | 561   | 2576  | 794  |
| Solyc02g031990.1.1 | -3.12845 | 3.382327 | 2.30E-10 | 7.63E-08 | 21  | 133  | 132  | 1121  | 1588  | 360  |
| Solyc05g010000.1.1 | -3.12782 | 0.962421 | 3.38E-05 | 0.001875 | 5   | 4    | 40   | 256   | 180   | 87   |
| Solyc10g076480.1.1 | -3.12683 | 5.722384 | 3.13E-10 | 9.58E-08 | 331 | 560  | 203  | 6466  | 6388  | 2212 |
| Solyc06g036420.1.1 | -3.12667 | 0.680551 | 1.67E-06 | 0.000153 | 2   | 19   | 21   | 170   | 224   | 57   |
| Solyc04g024780.1.1 | -3.12454 | 0.691754 | 3.25E-05 | 0.001814 | 2   | 33   | 8    | 146   | 278   | 46   |
| Solyc03g098740.1.1 | -3.11922 | 6.117079 | 3.26E-05 | 0.001818 | 111 | 1822 | 94   | 7878  | 8945  | 3128 |
| Solyc07g062490.1.1 | -3.10664 | 5.856534 | 3.70E-06 | 0.000291 | 449 | 317  | 300  | 4517  | 12913 | 997  |
| Solyc12g007050.1.1 | -3.09278 | 5.029553 | 3.16E-13 | 2.33E-10 | 168 | 428  | 168  | 3397  | 4564  | 1500 |
| Solyc09g014820.2.1 | -3.08116 | 0.280651 | 5.77E-05 | 0.002836 | 1   | 26   | 6    | 105   | 193   | 45   |
| Solyc08g006750.2.1 | -3.06884 | 4.313362 | 3.94E-12 | 2.15E-09 | 71  | 291  | 163  | 2277  | 2868  | 654  |
| Solyc11g073080.1.1 | -3.06472 | 1.296969 | 3.10E-06 | 0.000252 | 9   | 23   | 30   | 305   | 347   | 49   |
| Solyc12g005940.1.1 | -3.05023 | 3.725685 | 4.08E-07 | 4.54E-05 | 90  | 129  | 64   | 2081  | 1162  | 385  |
| Solyc08g062490.2.1 | -3.04884 | 5.034167 | 3.83E-10 | 1.13E-07 | 91  | 657  | 180  | 3768  | 4317  | 1326 |
| Solyc12g005720.1.1 | -3.03881 | 5.060315 | 6.86E-13 | 4.35E-10 | 100 | 575  | 262  | 2975  | 5608  | 1355 |
| Solyc03g114890.2.1 | -3.03121 | 3.589484 | 1.89E-09 | 4.29E-07 | 42  | 222  | 64   | 1382  | 1557  | 493  |
| Solyc11g068940.1.1 | -3.02095 | 2.324652 | 1.54E-09 | 3.75E-07 | 18  | 60   | 56   | 375   | 924   | 199  |
| Solyc12g044950.1.1 | -3.01816 | 2.879624 | 2.19E-10 | 7.35E-08 | 20  | 85   | 103  | 570   | 1316  | 311  |
| Solyc03g020060.2.1 | -3.01065 | 1.411019 | 8.82E-06 | 0.006618 | 23  | 19   | 11   | 144   | 258   | 295  |
| Solyc04g078660.1.1 | -3.01042 | 4.878217 | 7.93E-14 | 6.54E-11 | 93  | 400  | 339  | 3332  | 4124  | 1056 |
| Solyc10g085010.1.1 | -3.0044  | 7.52461  | 3.99E-10 | 1.16E-07 | 740 | 3531 | 740  | 19176 | 23863 | 9441 |
| Solyc08g068610.2.1 | -2.99418 | 3.993274 | 2.30E-08 | 3.86E-06 | 114 | 154  | 82   | 1825  | 2267  | 514  |
| Solyc08g007460.2.1 | -2.99192 | 7.608505 | 7.46E-15 | 7.82E-12 | 968 | 2762 | 1295 | 18739 | 28004 | 9675 |
| Solyc08g068720.1.1 | -2.98179 | 0.319037 | 1.83E-05 | 0.001127 | 4   | 18   | 11   | 175   | 98    | 49   |
| Solyc03g114230.1.1 | -2.97023 | 3.175073 | 7.05E-06 | 0.000508 | 64  | 22   | 116  | 699   | 1754  | 286  |
| Solyc06g074140.1.1 | -2.96873 | 3.854686 | 0.000155 | 0.006481 | 87  | 11   | 250  | 1457  | 2426  | 410  |
| Solyc07g063710.1.1 | -2.94892 | 1.384623 | 7.57E-05 | 0.003529 | 18  | 12   | 30   | 186   | 558   | 50   |



|                    |          |          |          |          |      |      |      |       |       |       |
|--------------------|----------|----------|----------|----------|------|------|------|-------|-------|-------|
| Solyc02g077370.1.1 | -2.93429 | 4.696575 | 3.94E-12 | 2.15E-09 | 86   | 513  | 172  | 2163  | 4002  | 1363  |
| Solyc10g008080.1.1 | -2.92593 | -0.09118 | 1.73E-05 | 0.001075 | 2    | 10   | 14   | 108   | 87    | 46    |
| Solyc01g010060.2.1 | -2.91574 | 3.513248 | 1.70E-07 | 2.16E-05 | 48   | 237  | 41   | 1289  | 1431  | 492   |
| Solyc07g006420.1.1 | -2.91227 | 3.761383 | 1.11E-07 | 1.47E-05 | 33   | 305  | 90   | 1612  | 1792  | 456   |
| Solyc09g082230.1.1 | -2.9097  | 3.998628 | 9.72E-11 | 3.78E-08 | 104  | 153  | 141  | 1710  | 2296  | 589   |
| Solyc10g008730.2.1 | -2.90138 | 2.790255 | 2.41E-08 | 3.96E-06 | 41   | 98   | 41   | 824   | 837   | 268   |
| Solyc11g069220.1.1 | -2.90065 | 1.612142 | 3.78E-09 | 7.91E-07 | 16   | 37   | 29   | 263   | 412   | 174   |
| Solyc02g082950.2.1 | -2.89797 | 2.669872 | 4.91E-08 | 7.48E-06 | 42   | 54   | 63   | 707   | 908   | 202   |
| Solyc07g049550.2.1 | -2.89077 | 5.915388 | 3.56E-06 | 0.000283 | 451  | 316  | 644  | 5515  | 12071 | 955   |
| Solyc07g062630.1.1 | -2.88912 | 0.714613 | 4.68E-07 | 5.16E-05 | 9    | 14   | 20   | 137   | 216   | 93    |
| Solyc08g068600.2.1 | -2.88387 | 5.893974 | 4.80E-11 | 2.11E-08 | 191  | 1160 | 501  | 6799  | 8009  | 2169  |
| Solyc08g075550.2.1 | -2.87963 | 4.80916  | 3.82E-13 | 2.74E-10 | 138  | 471  | 183  | 3111  | 3198  | 1462  |
| Solyc09g091670.2.1 | -2.87415 | 5.57515  | 5.97E-05 | 0.002896 | 96   | 1424 | 84   | 4126  | 7766  | 2071  |
| Solyc01g107390.2.1 | -2.87122 | 2.974612 | 2.93E-07 | 3.44E-05 | 65   | 55   | 60   | 1001  | 842   | 312   |
| Solyc11g010210.1.1 | -2.85613 | 1.117774 | 4.31E-06 | 0.000334 | 5    | 30   | 32   | 196   | 367   | 62    |
| Solyc08g066020.1.1 | -2.84512 | 3.942338 | 6.45E-06 | 0.000471 | 139  | 92   | 105  | 1750  | 2399  | 331   |
| Solyc12g056600.2.1 | -2.84189 | 4.828691 | 4.35E-06 | 0.000336 | 275  | 104  | 210  | 3737  | 1619  | 1963  |
| Solyc01g005800.2.1 | -2.8403  | 0.446336 | 0.000107 | 0.004751 | 7    | 12   | 18   | 205   | 109   | 37    |
| Solyc06g073760.2.1 | -2.83741 | 3.575476 | 3.85E-06 | 0.000302 | 86   | 170  | 45   | 1482  | 1605  | 301   |
| Solyc12g009520.1.1 | -2.83263 | 3.963049 | 1.85E-09 | 4.23E-07 | 104  | 209  | 98   | 1503  | 2410  | 594   |
| Solyc02g069800.1.1 | -2.83112 | 7.17188  | 6.17E-10 | 1.65E-07 | 1061 | 1704 | 848  | 15717 | 19295 | 5907  |
| Solyc05g005700.2.1 | -2.82357 | 4.124513 | 7.64E-08 | 1.08E-05 | 46   | 417  | 118  | 1553  | 2926  | 638   |
| Solyc05g056080.2.1 | -2.82353 | 2.294991 | 1.49E-08 | 2.74E-06 | 18   | 71   | 62   | 487   | 748   | 170   |
| Solyc02g092820.2.1 | -2.80541 | 3.962645 | 6.79E-08 | 9.79E-06 | 54   | 367  | 83   | 1732  | 2003  | 641   |
| Solyc02g082910.2.1 | -2.80128 | 5.522192 | 3.72E-05 | 0.002025 | 497  | 306  | 100  | 5208  | 5657  | 1976  |
| Solyc10g079810.1.1 | -2.80032 | 2.96565  | 4.79E-10 | 1.35E-07 | 51   | 99   | 64   | 731   | 1083  | 382   |
| Solyc04g016230.2.1 | -2.78962 | 3.360734 | 1.19E-06 | 0.000114 | 77   | 74   | 114  | 1429  | 1153  | 256   |
| Solyc03g116900.2.1 | -2.78872 | 8.270929 | 4.35E-14 | 3.83E-11 | 1374 | 5009 | 3250 | 35311 | 37247 | 13536 |
| Solyc01g096420.2.1 | -2.78308 | 5.276477 | 1.34E-07 | 1.75E-05 | 199  | 828  | 142  | 2935  | 6816  | 1672  |
| Solyc03g094120.2.1 | -2.77127 | 3.876162 | 3.94E-05 | 0.002108 | 24   | 460  | 50   | 1730  | 1492  | 755   |
| Solyc07g055400.1.1 | -2.77125 | 2.420199 | 3.11E-07 | 3.61E-05 | 28   | 65   | 66   | 243   | 1149  | 228   |
| Solyc09g057960.1.1 | -2.77036 | 1.117927 | 0.000114 | 0.005077 | 18   | 23   | 13   | 156   | 430   | 52    |
| Solyc04g076730.1.1 | -2.76875 | 1.654952 | 1.97E-06 | 0.000174 | 26   | 17   | 37   | 312   | 377   | 164   |
| Solyc12g006380.1.1 | -2.75388 | 3.31116  | 2.22E-06 | 0.00019  | 87   | 73   | 84   | 1429  | 900   | 332   |
| Solyc06g066630.1.1 | -2.75226 | 1.920505 | 1.16E-06 | 0.000112 | 28   | 39   | 35   | 257   | 705   | 145   |
| Solyc03g080190.2.1 | -2.7425  | 5.423284 | 2.10E-06 | 0.000182 | 376  | 498  | 186  | 3218  | 8483  | 1249  |
| Solyc01g079140.2.1 | -2.74183 | 3.040245 | 1.82E-07 | 2.28E-05 | 54   | 121  | 60   | 1112  | 824   | 287   |
| Solyc02g093250.2.1 | -2.73761 | 3.84234  | 8.23E-10 | 2.12E-07 | 60   | 241  | 166  | 1813  | 1653  | 491   |
| Solyc05g012180.2.1 | -2.73488 | 3.646578 | 6.15E-10 | 1.65E-07 | 61   | 184  | 149  | 1454  | 1636  | 419   |
| Solyc02g072070.2.1 | -2.73175 | 1.449915 | 5.31E-05 | 0.002648 | 10   | 66   | 13   | 391   | 207   | 109   |
| Solyc01g086680.2.1 | -2.7312  | 2.185286 | 1.45E-05 | 0.000931 | 15   | 114  | 24   | 546   | 580   | 135   |
| Solyc03g005480.2.1 | -2.72828 | 1.206297 | 4.03E-05 | 0.002138 | 20   | 26   | 13   | 257   | 302   | 72    |
| Solyc08g080130.2.1 | -2.72695 | 7.585964 | 1.24E-11 | 6.14E-09 | 1316 | 2305 | 1834 | 19930 | 27216 | 7444  |
| Solyc03g119370.1.1 | -2.72115 | 3.519858 | 2.31E-08 | 3.86E-06 | 43   | 191  | 151  | 1373  | 1541  | 316   |
| Solyc07g017880.2.1 | -2.71852 | 2.629724 | 3.87E-05 | 0.002086 | 52   | 17   | 91   | 844   | 550   | 247   |
| Solyc06g035810.1.1 | -2.70806 | 0.595418 | 2.26E-05 | 0.001355 | 9    | 19   | 16   | 86    | 277   | 65    |
| Solyc10g007280.2.1 | -2.70617 | 7.251182 | 2.00E-07 | 2.49E-05 | 1418 | 1585 | 740  | 16113 | 20161 | 6453  |
| Solyc09g075920.1.1 | -2.70314 | 4.400869 | 2.71E-14 | 2.61E-11 | 94   | 377  | 227  | 1679  | 3185  | 1136  |
| Solyc11g007890.1.1 | -2.67325 | 2.301251 | 5.40E-06 | 0.000403 | 35   | 21   | 87   | 396   | 810   | 201   |
| Solyc09g090970.2.1 | -2.66301 | 2.127901 | 1.13E-05 | 0.000757 | 19   | 111  | 17   | 250   | 718   | 269   |
| Solyc08g006470.2.1 | -2.66294 | 4.213532 | 4.96E-05 | 0.002521 | 204  | 96   | 122  | 2573  | 2005  | 486   |
| Solyc08g068770.1.1 | -2.6622  | 6.584746 | 2.28E-08 | 3.86E-06 | 350  | 2439 | 645  | 8955  | 14524 | 3904  |
| Solyc09g005560.2.1 | -2.66016 | 1.97956  | 1.17E-05 | 0.00078  | 8    | 99   | 39   | 538   | 325   | 166   |
| Solyc05g053600.2.1 | -2.65688 | 6.33829  | 6.79E-08 | 9.79E-06 | 633  | 735  | 927  | 9376  | 11636 | 2006  |
| Solyc06g069130.2.1 | -2.65602 | 3.725551 | 2.06E-07 | 2.52E-05 | 33   | 339  | 123  | 1475  | 1640  | 536   |
| Solyc08g062360.2.1 | -2.6458  | 5.908911 | 2.13E-10 | 7.27E-08 | 229  | 1473 | 451  | 5328  | 8130  | 3280  |
| Solyc02g085360.2.1 | -2.64268 | 5.038412 | 1.10E-10 | 4.17E-08 | 251  | 276  | 430  | 3481  | 4257  | 1386  |
| Solyc04g058160.1.1 | -2.64186 | 3.121852 | 1.82E-09 | 4.21E-07 | 52   | 136  | 90   | 1021  | 934   | 389   |
| Solyc01g073820.2.1 | -2.63486 | 1.898942 | 3.58E-07 | 4.03E-05 | 14   | 84   | 32   | 254   | 578   | 211   |
| Solyc04g016000.2.1 | -2.63442 | 3.367943 | 1.60E-08 | 2.91E-06 | 42   | 154  | 166  | 912   | 1755  | 323   |
| Solyc01g073840.1.1 | -2.62193 | 0.2839   | 0.000101 | 0.004547 | 4    | 20   | 17   | 141   | 144   | 35    |
| Solyc09g011630.2.1 | -2.60343 | 3.91553  | 2.38E-11 | 1.12E-08 | 85   | 195  | 225  | 1279  | 2370  | 641   |
| Solyc05g044490.2.1 | -2.60285 | 1.471086 | 9.31E-05 | 0.004228 | 23   | 39   | 18   | 246   | 481   | 64    |
| Solyc02g062550.2.1 | -2.60159 | 3.453567 | 2.81E-09 | 6.09E-07 | 54   | 235  | 91   | 1202  | 1154  | 575   |
| Solyc03g123680.1.1 | -2.60075 | 4.567501 | 6.63E-05 | 0.00319  | 279  | 176  | 90   | 2769  | 3068  | 744   |
| Solyc09g007730.2.1 | -2.60038 | 2.345277 | 1.07E-07 | 1.42E-05 | 24   | 60   | 91   | 412   | 845   | 192   |
| Solyc09g091540.1.1 | -2.5984  | 2.180844 | 6.18E-06 | 0.000455 | 27   | 37   | 84   | 224   | 284   | 601   |
| Solyc02g036480.1.1 | -2.5917  | 6.056116 | 4.39E-08 | 6.80E-06 | 244  | 1844 | 410  | 6571  | 8365  | 3355  |
| Solyc02g090110.2.1 | -2.58841 | 5.911885 | 2.93E-11 | 1.35E-08 | 395  | 914  | 643  | 6194  | 8553  | 2176  |
| Solyc07g045530.1.1 | -2.58339 | 3.605047 | 3.69E-08 | 5.88E-06 | 64   | 279  | 79   | 892   | 1907  | 638   |
| Solyc06g009290.2.1 | -2.53834 | 6.194849 | 3.02E-11 | 1.37E-08 | 429  | 1052 | 1077 | 8568  | 8956  | 2560  |
| Solyc01g079940.2.1 | -2.52414 | 2.71802  | 1.52E-07 | 1.95E-05 | 41   | 99   | 86   | 558   | 1096  | 218   |
| Solyc09g011550.2.1 | -2.52275 | 3.938398 | 1.62E-06 | 0.00015  | 44   | 448  | 127  | 1072  | 2677  | 662   |
| Solyc09g011260.1.1 | -2.51156 | 2.142012 | 2.23E-05 | 0.001341 | 41   | 67   | 24   | 497   | 525   | 162   |
| Solyc04g054690.2.1 | -2.50634 | 3.622421 | 6.30E-06 | 0.000461 | 77   | 295  | 60   | 1258  | 1776  | 401   |
| Solyc02g031790.1.1 | -2.49357 | 4.178495 | 3.34E-10 | 1.01E-07 | 120  | 297  | 213  | 1978  | 2262  | 697   |
| Solyc08g028780.1.1 | -2.4903  | 3.404115 | 1.73E-08 | 3.09E-06 | 54   | 202  | 138  | 713   | 1911  | 428   |
| Solyc04g064870.2.1 | -2.48544 | 6.625528 | 3.99E-10 | 1.16E-07 | 388  | 2409 | 1139 | 7781  | 15544 | 4548  |
| Solyc12g036390.1.1 | -2.48138 | 5.458755 | 3.56E-09 | 7.64E-07 | 301  | 808  | 422  | 5402  | 4990  | 1485  |
| Solyc01g095960.2.1 | -2.47885 | 3.834353 | 1.30E-05 | 0.000852 | 111  | 86   | 273  | 762   | 3032  | 466   |
| Solyc06g008620.1.1 | -2.47679 | 1.383214 | 2.26E-05 | 0.001355 | 12   | 59   | 26   | 198   | 448   | 87    |
| Solyc12g056360.1.1 | -2.4694  | 3.667091 | 1.37E-08 | 1.05E-05 | 99   | 236  | 91   | 1289  | 1580  | 570   |
| Solyc08g068730.1.1 | -2.46922 | 6.121016 | 2.41E-08 | 3.96E-06 | 246  | 1743 | 863  | 8349  | 8044  | 2433  |

|                    |          |          |          |          |      |       |      |       |       |       |
|--------------------|----------|----------|----------|----------|------|-------|------|-------|-------|-------|
| Solyc02g080080.2.1 | -2.46142 | 6.191701 | 4.67E-07 | 5.16E-05 | 553  | 1505  | 438  | 8039  | 9724  | 2388  |
| Solyc12g045030.1.1 | -2.45414 | 7.157621 | 1.26E-08 | 2.37E-06 | 1047 | 2729  | 1183 | 10610 | 24877 | 5532  |
| Solyc12g006280.1.1 | -2.43915 | 0.250593 | 0.000141 | 0.005973 | 4    | 18    | 23   | 125   | 141   | 41    |
| Solyc11g005350.1.1 | -2.43398 | 3.252309 | 4.79E-05 | 0.002452 | 112  | 82    | 70   | 1198  | 995   | 327   |
| Solyc04g071070.2.1 | -2.43023 | 1.424426 | 0.000193 | 0.007785 | 21   | 56    | 14   | 193   | 478   | 85    |
| Solyc08g077330.2.1 | -2.42638 | 5.726923 | 3.96E-05 | 0.002114 | 476  | 1059  | 193  | 7478  | 4458  | 1830  |
| Solyc04g077300.2.1 | -2.42625 | 2.879429 | 5.44E-07 | 5.88E-05 | 46   | 120   | 106  | 848   | 930   | 216   |
| Solyc04g005050.1.1 | -2.42623 | 5.823508 | 9.39E-11 | 3.71E-08 | 314  | 1226  | 647  | 5479  | 7937  | 2224  |
| Solyc04g079250.2.1 | -2.42587 | 4.373534 | 2.27E-08 | 3.86E-06 | 55   | 495   | 348  | 1202  | 3444  | 1192  |
| Solyc09g007520.2.1 | -2.4249  | 4.51396  | 7.21E-06 | 0.000517 | 192  | 425   | 152  | 2847  | 2840  | 539   |
| Solyc10g076780.1.1 | -2.42478 | 3.030769 | 1.84E-06 | 0.000165 | 79   | 82    | 97   | 863   | 1060  | 293   |
| Solyc04g074780.2.1 | -2.40154 | 1.471262 | 2.78E-05 | 0.001619 | 20   | 49    | 30   | 368   | 222   | 109   |
| Solyc10g084960.1.1 | -2.39748 | 3.220532 | 8.95E-05 | 0.004106 | 22   | 330   | 63   | 759   | 1482  | 365   |
| Solyc02g091700.2.1 | -2.39743 | 3.944219 | 2.08E-06 | 0.000181 | 82   | 370   | 158  | 1591  | 2345  | 371   |
| Solyc03g119240.2.1 | -2.39352 | 3.498767 | 1.82E-07 | 2.28E-05 | 42   | 274   | 161  | 1148  | 1539  | 404   |
| Solyc02g062790.2.1 | -2.38681 | 1.68725  | 0.000172 | 0.007044 | 20   | 58    | 43   | 482   | 279   | 65    |
| Solyc05g056380.2.1 | -2.38496 | 1.057139 | 3.64E-06 | 0.000288 | 9    | 39    | 34   | 144   | 293   | 117   |
| Solyc09g098160.2.1 | -2.3838  | 2.880017 | 8.44E-08 | 1.17E-05 | 24   | 174   | 117  | 709   | 879   | 371   |
| Solyc02g085300.2.1 | -2.37701 | 3.227817 | 2.44E-06 | 0.000207 | 52   | 247   | 73   | 1097  | 1000  | 371   |
| Solyc07g008600.1.1 | -2.36849 | 1.699268 | 1.66E-06 | 0.000153 | 20   | 61    | 43   | 310   | 418   | 136   |
| Solyc09g008740.1.1 | -2.36351 | 0.601279 | 0.000162 | 0.006713 | 13   | 25    | 14   | 120   | 224   | 59    |
| Solyc11g008200.1.1 | -2.35767 | 1.790585 | 1.43E-05 | 0.000925 | 32   | 49    | 37   | 367   | 416   | 129   |
| Solyc02g061770.2.1 | -2.35576 | 4.931059 | 0.00016  | 0.00663  | 248  | 775   | 81   | 3492  | 3782  | 963   |
| Solyc09g007890.1.1 | -2.34402 | 2.096636 | 0.000185 | 0.007532 | 12   | 144   | 34   | 333   | 723   | 140   |
| Solyc09g082240.2.1 | -2.33788 | 1.86615  | 3.16E-05 | 0.001777 | 16   | 72    | 64   | 468   | 385   | 98    |
| Solyc08g065210.1.1 | -2.33575 | 1.415578 | 7.83E-05 | 0.003641 | 15   | 65    | 26   | 356   | 180   | 121   |
| Solyc11g066800.1.1 | -2.33516 | 4.320024 | 6.81E-05 | 0.00325  | 220  | 256   | 156  | 2955  | 1728  | 484   |
| Solyc06g069740.1.1 | -2.33476 | 1.562358 | 0.000195 | 0.00784  | 20   | 81    | 12   | 298   | 322   | 143   |
| Solyc09g011590.2.1 | -2.3316  | 7.350452 | 1.26E-10 | 4.53E-08 | 726  | 4075  | 2273 | 13547 | 22958 | 8046  |
| Solyc11g017280.1.1 | -2.32716 | 4.996328 | 3.00E-10 | 9.30E-08 | 231  | 675   | 324  | 3053  | 4062  | 1462  |
| Solyc01g096430.2.1 | -2.32303 | 4.432991 | 8.49E-08 | 1.17E-05 | 144  | 388   | 321  | 1813  | 3717  | 596   |
| Solyc12g011090.1.1 | -2.32141 | 0.720779 | 5.32E-05 | 0.002648 | 9    | 41    | 15   | 137   | 197   | 89    |
| Solyc08g021870.1.1 | -2.31973 | 0.211205 | 7.32E-05 | 0.003428 | 4    | 20    | 23   | 85    | 145   | 65    |
| Solyc01g009930.1.1 | -2.31732 | 2.873284 | 0.000193 | 0.007769 | 30   | 261   | 30   | 505   | 1148  | 363   |
| Solyc12g010710.1.1 | -2.3148  | 3.55012  | 1.37E-07 | 1.77E-05 | 104  | 171   | 147  | 910   | 1873  | 468   |
| Solyc10g079930.1.1 | -2.31447 | 6.68767  | 4.91E-12 | 2.62E-09 | 695  | 2317  | 1092 | 7369  | 11542 | 7985  |
| Solyc04g078290.2.1 | -2.31367 | 7.370713 | 8.58E-10 | 2.18E-07 | 988  | 4291  | 1548 | 13925 | 21354 | 9140  |
| Solyc03g020010.1.1 | -2.31338 | 2.228783 | 5.12E-05 | 0.002583 | 41   | 90    | 38   | 296   | 878   | 157   |
| Solyc01g073890.2.1 | -2.31247 | 3.964608 | 1.58E-05 | 0.000997 | 85   | 486   | 85   | 1766  | 1679  | 652   |
| Solyc09g075910.1.1 | -2.30184 | 4.048274 | 2.34E-08 | 3.89E-06 | 99   | 386   | 198  | 1274  | 2686  | 651   |
| Solyc01g007050.1.1 | -2.3014  | 1.981541 | 1.36E-05 | 0.000889 | 11   | 122   | 46   | 348   | 450   | 228   |
| Solyc01g086660.2.1 | -2.3006  | 1.94751  | 4.95E-05 | 0.002521 | 17   | 68    | 80   | 518   | 372   | 103   |
| Solyc10g055200.1.1 | -2.29705 | 6.542601 | 1.82E-09 | 4.21E-07 | 708  | 1914  | 996  | 8041  | 13774 | 3813  |
| Solyc11g018800.1.1 | -2.29208 | 2.153229 | 1.93E-05 | 0.001187 | 25   | 90    | 69   | 388   | 735   | 113   |
| Solyc10g017570.2.1 | -2.28276 | 3.275173 | 8.97E-08 | 1.22E-05 | 59   | 194   | 148  | 683   | 1627  | 391   |
| Solyc02g092110.2.1 | -2.27861 | 4.854965 | 2.45E-10 | 7.94E-08 | 257  | 483   | 335  | 2171  | 4191  | 1504  |
| Solyc03g026230.1.1 | -2.27852 | 3.629619 | 4.56E-06 | 0.000351 | 60   | 255   | 226  | 1787  | 982   | 376   |
| Solyc12g097000.1.1 | -2.27059 | 2.093893 | 4.04E-06 | 0.000315 | 42   | 65    | 46   | 378   | 531   | 210   |
| Solyc09g091550.2.1 | -2.26918 | 6.246193 | 7.01E-05 | 0.003312 | 1052 | 463   | 645  | 5178  | 5739  | 7766  |
| Solyc05g009230.1.1 | -2.2649  | 3.411048 | 5.35E-06 | 0.0004   | 122  | 144   | 87   | 872   | 1502  | 495   |
| Solyc09g090470.2.1 | -2.26045 | 3.443191 | 1.39E-06 | 0.000131 | 82   | 221   | 130  | 873   | 1827  | 339   |
| Solyc09g011990.1.1 | -2.24952 | 2.229277 | 4.71E-06 | 0.00036  | 39   | 69    | 73   | 376   | 735   | 169   |
| Solyc06g062330.1.1 | -2.24398 | 2.878622 | 2.44E-05 | 0.00145  | 58   | 91    | 141  | 423   | 1477  | 218   |
| Solyc05g010030.2.1 | -2.24047 | 1.759372 | 6.08E-06 | 0.000451 | 17   | 80    | 50   | 233   | 527   | 156   |
| Solyc04g072800.2.1 | -2.23851 | 3.131108 | 1.22E-07 | 1.60E-05 | 62   | 137   | 161  | 959   | 971   | 353   |
| Solyc06g071070.1.1 | -2.2378  | 5.07561  | 9.34E-08 | 1.26E-05 | 295  | 447   | 555  | 3174  | 5092  | 1007  |
| Solyc02g068680.1.1 | -2.23324 | 4.216433 | 3.11E-07 | 3.61E-05 | 71   | 609   | 196  | 1277  | 2449  | 1206  |
| Solyc07g056200.2.1 | -2.2316  | 6.524314 | 2.92E-07 | 3.44E-05 | 768  | 2269  | 604  | 8934  | 10356 | 4773  |
| Solyc07g040890.1.1 | -2.22493 | 3.031104 | 5.22E-06 | 0.000393 | 60   | 221   | 56   | 649   | 1093  | 429   |
| Solyc01g107780.2.1 | -2.21883 | 6.14702  | 3.66E-09 | 7.72E-07 | 710  | 1082  | 823  | 6646  | 8751  | 3360  |
| Solyc05g051530.2.1 | -2.2125  | 4.791967 | 2.05E-06 | 0.000179 | 201  | 781   | 182  | 2537  | 3771  | 1134  |
| Solyc04g079820.2.1 | -2.20823 | 1.828605 | 1.90E-06 | 0.000169 | 18   | 54    | 85   | 288   | 446   | 191   |
| Solyc03g114500.2.1 | -2.20427 | 5.382302 | 1.07E-10 | 4.12E-08 | 291  | 848   | 640  | 3886  | 5637  | 1672  |
| Solyc08g014570.2.1 | -2.20094 | 6.671688 | 2.02E-06 | 0.000178 | 1208 | 920   | 1349 | 10043 | 13022 | 4085  |
| Solyc04g071890.2.1 | -2.199   | 6.486671 | 5.42E-08 | 8.11E-06 | 822  | 1579  | 1097 | 5340  | 15994 | 3868  |
| Solyc11g011240.1.1 | -2.19118 | 6.03074  | 1.09E-05 | 0.000737 | 808  | 680   | 706  | 5861  | 9965  | 2096  |
| Solyc02g077040.2.1 | -2.1911  | 8.686555 | 1.07E-07 | 1.42E-05 | 3175 | 11001 | 3116 | 36308 | 47803 | 23403 |
| Solyc08g067340.2.1 | -2.18343 | 6.793446 | 0.000152 | 0.006363 | 1605 | 1189  | 543  | 11460 | 11487 | 5618  |
| Solyc04g051690.2.1 | -2.18254 | 4.935277 | 8.80E-10 | 2.22E-07 | 249  | 607   | 409  | 3342  | 3085  | 1426  |
| Solyc05g041540.2.1 | -2.17949 | 4.711167 | 5.92E-07 | 6.33E-05 | 237  | 520   | 287  | 2686  | 3561  | 790   |
| Solyc03g007380.1.1 | -2.17786 | 2.382521 | 2.94E-05 | 0.001681 | 36   | 54    | 133  | 196   | 858   | 357   |
| Solyc08g021820.2.1 | -2.17619 | 0.90395  | 0.000204 | 0.00815  | 17   | 34    | 22   | 171   | 244   | 68    |
| Solyc02g083850.2.1 | -2.1734  | 2.767195 | 0.000104 | 0.004662 | 82   | 101   | 55   | 609   | 1001  | 224   |
| Solyc09g014990.2.1 | -2.1727  | 6.580421 | 2.92E-10 | 9.13E-08 | 533  | 2315  | 1571 | 8998  | 12179 | 4186  |
| Solyc03g097840.2.1 | -2.16972 | 6.578902 | 1.61E-09 | 3.84E-07 | 832  | 1679  | 1383 | 9413  | 12008 | 3885  |
| Solyc07g065250.2.1 | -2.16797 | 4.000105 | 7.25E-08 | 1.04E-05 | 132  | 269   | 263  | 1555  | 2166  | 555   |
| Solyc08g074970.1.1 | -2.16691 | 3.693598 | 2.85E-07 | 3.38E-05 | 105  | 235   | 200  | 1365  | 1604  | 442   |
| Solyc05g053330.2.1 | -2.15579 | 4.773637 | 1.72E-05 | 0.001074 | 300  | 164   | 549  | 3110  | 2736  | 1157  |
| Solyc03g115930.1.1 | -2.15451 | 5.74896  | 1.65E-06 | 0.000152 | 470  | 1387  | 363  | 5765  | 5745  | 2374  |
| Solyc04g074680.1.1 | -2.14726 | 4.750478 | 5.88E-05 | 0.002877 | 81   | 1085  | 221  | 2591  | 3173  | 1256  |
| Solyc01g067020.2.1 | -2.14539 | 5.900382 | 1.47E-06 | 0.000137 | 642  | 1071  | 554  | 5862  | 8043  | 2056  |
| Solyc03g122350.2.1 | -2.14491 | 7.636597 | 1.20E-10 | 4.37E-08 | 1615 | 3961  | 2898 | 18424 | 24348 | 9447  |
| Solyc10g085860.1.1 | -2.14116 | 2.476448 | 0.00013  | 0.005618 | 13   | 206   | 68   | 356   | 799   | 320   |

|                    |          |          |          |          |      |       |      |       |       |       |
|--------------------|----------|----------|----------|----------|------|-------|------|-------|-------|-------|
| Solyc03g119970.2.1 | -2.13548 | 5.358401 | 7.61E-10 | 1.99E-07 | 307  | 793   | 702  | 4708  | 3997  | 1751  |
| Solyc03g113080.2.1 | -2.1333  | 3.121455 | 2.71E-06 | 0.000225 | 52   | 228   | 122  | 757   | 1283  | 302   |
| Solyc01g060020.2.1 | -2.13308 | 8.877529 | 2.17E-06 | 0.000187 | 4038 | 11425 | 4394 | 37420 | 77106 | 15333 |
| Solyc01g080800.2.1 | -2.12605 | 4.302382 | 6.92E-05 | 0.003296 | 66   | 779   | 171  | 1070  | 3212  | 1093  |
| Solyc06g035960.2.1 | -2.11791 | 8.104329 | 1.81E-09 | 4.21E-07 | 1938 | 5768  | 4772 | 29611 | 30735 | 10998 |
| Solyc08g066270.1.1 | -2.11788 | 1.672928 | 3.16E-05 | 0.001777 | 26   | 74    | 36   | 279   | 406   | 139   |
| Solyc01g099910.2.1 | -2.11603 | 3.86057  | 1.42E-05 | 0.000924 | 91   | 343   | 241  | 1412  | 2238  | 311   |
| Solyc09g007900.2.1 | -2.11076 | 7.763018 | 4.37E-13 | 3.05E-10 | 1497 | 4529  | 3929 | 18600 | 24193 | 12999 |
| Solyc07g043320.2.1 | -2.10622 | 7.564384 | 8.13E-09 | 1.57E-06 | 1490 | 3707  | 3177 | 18627 | 24772 | 6767  |
| Solyc03g116890.2.1 | -2.1012  | 5.711483 | 4.59E-09 | 9.47E-07 | 446  | 810   | 1008 | 4714  | 7385  | 1919  |
| Solyc04g025650.2.1 | -2.09913 | 4.185065 | 0.000102 | 0.004595 | 214  | 202   | 267  | 1250  | 3456  | 436   |
| Solyc03g116690.2.1 | -2.09618 | 2.481363 | 5.02E-06 | 0.000381 | 30   | 165   | 73   | 358   | 813   | 306   |
| Solyc03g119250.2.1 | -2.08854 | 6.006091 | 1.76E-06 | 0.000161 | 353  | 2178  | 629  | 6904  | 6726  | 2805  |
| Solyc01g088400.2.1 | -2.08239 | 3.825859 | 8.64E-08 | 1.18E-05 | 137  | 215   | 242  | 1486  | 1106  | 877   |
| Solyc01g106620.2.1 | -2.07909 | 7.627824 | 0.000186 | 0.007552 | 2285 | 4524  | 854  | 16775 | 29081 | 7331  |
| Solyc09g014280.1.1 | -2.0771  | 6.329902 | 2.05E-07 | 2.51E-05 | 910  | 741   | 1488 | 5555  | 10635 | 4869  |
| Solyc01g067120.2.1 | -2.06868 | 2.683668 | 4.60E-06 | 0.000353 | 24   | 192   | 115  | 442   | 867   | 367   |
| Solyc08g068870.2.1 | -2.067   | 8.892377 | 0.000216 | 0.008525 | 7037 | 6179  | 2582 | 46740 | 55121 | 21011 |
| Solyc08g062320.2.1 | -2.06371 | 3.321667 | 4.45E-08 | 6.80E-06 | 78   | 206   | 171  | 902   | 1182  | 486   |
| Solyc06g082570.1.1 | -2.06355 | 5.938766 | 7.15E-05 | 0.00336  | 852  | 601   | 692  | 6782  | 7155  | 1988  |
| Solyc03g044900.2.1 | -2.06141 | 6.217918 | 4.21E-05 | 0.002195 | 547  | 2338  | 599  | 6621  | 11635 | 1996  |
| Solyc01g106500.2.1 | -2.04516 | 5.639387 | 7.36E-07 | 7.56E-05 | 578  | 827   | 576  | 4950  | 6155  | 1877  |
| Solyc02g080890.2.1 | -2.04348 | 5.171058 | 8.44E-07 | 8.39E-05 | 245  | 1059  | 434  | 3889  | 4192  | 1236  |
| Solyc12g056960.1.1 | -2.02993 | 4.112274 | 7.80E-07 | 7.90E-05 | 154  | 335   | 287  | 1227  | 2892  | 597   |
| Solyc09g011270.2.1 | -2.02456 | 2.924449 | 1.53E-05 | 0.000971 | 74   | 173   | 84   | 740   | 922   | 291   |
| Solyc08g016210.2.1 | -2.0217  | 7.477079 | 9.40E-05 | 0.004253 | 1689 | 5110  | 1109 | 18401 | 22790 | 5502  |
| Solyc02g079590.2.1 | -2.00321 | 6.397926 | 7.33E-11 | 3.02E-08 | 772  | 1536  | 1521 | 5818  | 11293 | 4845  |
| Solyc01g009690.1.1 | -1.99909 | 4.559132 | 6.62E-06 | 0.000482 | 191  | 715   | 213  | 2489  | 2611  | 908   |
| Solyc01g014840.2.1 | -1.98672 | 4.43196  | 2.70E-08 | 4.41E-06 | 179  | 494   | 351  | 2171  | 2428  | 896   |
| Solyc03g113070.2.1 | -1.98039 | 2.787978 | 7.10E-07 | 7.38E-05 | 52   | 156   | 127  | 652   | 741   | 338   |
| Solyc05g050800.2.1 | -1.9758  | 7.0618   | 2.68E-10 | 8.47E-08 | 1101 | 3094  | 2219 | 10572 | 17324 | 6719  |
| Solyc12g057140.1.1 | -1.97214 | 4.613221 | 2.03E-06 | 0.000178 | 119  | 853   | 348  | 2425  | 2771  | 1033  |
| Solyc01g096510.2.1 | -1.97022 | 5.687493 | 1.05E-05 | 0.000712 | 255  | 2027  | 508  | 4585  | 6264  | 2384  |
| Solyc10g007880.2.1 | -1.96953 | 4.032245 | 2.68E-05 | 0.001575 | 189  | 299   | 206  | 2081  | 961   | 832   |
| Solyc05g008820.2.1 | -1.95764 | 3.104052 | 2.92E-05 | 0.001675 | 57   | 256   | 125  | 876   | 1060  | 273   |
| Solyc09g005090.1.1 | -1.95333 | 3.60316  | 1.22E-06 | 0.000116 | 102  | 348   | 138  | 986   | 1420  | 667   |
| Solyc12g036330.1.1 | -1.95001 | 2.957361 | 7.41E-07 | 7.59E-05 | 60   | 189   | 134  | 696   | 883   | 377   |
| Solyc03g11720.2.1  | -1.94623 | 6.667869 | 1.19E-05 | 0.000791 | 1223 | 918   | 2145 | 11278 | 9042  | 4726  |
| Solyc02g093950.2.1 | -1.93829 | 1.964133 | 8.67E-05 | 0.003983 | 31   | 119   | 41   | 291   | 499   | 199   |
| Solyc05g056170.2.1 | -1.93796 | 6.811916 | 2.06E-10 | 7.12E-08 | 868  | 2545  | 2226 | 10207 | 12644 | 5557  |
| Solyc04g009440.2.1 | -1.92275 | 6.497037 | 1.65E-06 | 0.000152 | 944  | 1310  | 1885 | 7554  | 13413 | 2949  |
| Solyc01g086730.2.1 | -1.92106 | 4.494004 | 3.47E-07 | 3.96E-05 | 258  | 420   | 321  | 1917  | 2830  | 1019  |
| Solyc03g118970.2.1 | -1.91313 | 6.706916 | 9.79E-07 | 9.60E-05 | 1210 | 1077  | 2322 | 9403  | 11033 | 5625  |
| Solyc09g047910.2.1 | -1.91233 | 3.139269 | 1.03E-05 | 0.000705 | 72   | 163   | 204  | 857   | 1109  | 290   |
| Solyc12g044940.1.1 | -1.90939 | 5.847019 | 2.09E-08 | 3.65E-06 | 454  | 1561  | 918  | 4204  | 8321  | 2549  |
| Solyc07g052790.1.1 | -1.90891 | 5.431432 | 3.08E-05 | 0.001742 | 518  | 938   | 432  | 4460  | 5313  | 1308  |
| Solyc01g086670.2.1 | -1.9089  | 3.593795 | 1.04E-05 | 0.000709 | 143  | 164   | 224  | 803   | 1809  | 551   |
| Solyc03g095770.2.1 | -1.90766 | 6.635032 | 2.56E-06 | 0.000215 | 969  | 2862  | 924  | 8517  | 12152 | 4674  |
| Solyc05g014390.2.1 | -1.90683 | 5.922307 | 2.79E-05 | 0.001619 | 536  | 1716  | 175  | 5921  | 8513  | 1492  |
| Solyc06g005480.2.1 | -1.90182 | 3.893877 | 4.01E-07 | 4.48E-05 | 128  | 312   | 299  | 1174  | 2107  | 590   |
| Solyc09g011560.2.1 | -1.90047 | 5.45123  | 2.33E-07 | 2.83E-05 | 410  | 1186  | 535  | 3903  | 5423  | 1853  |
| Solyc12g010410.1.1 | -1.88906 | 2.842934 | 4.14E-05 | 0.002179 | 38   | 244   | 115  | 634   | 905   | 287   |
| Solyc05g041910.2.1 | -1.88614 | 7.490516 | 3.02E-08 | 4.87E-06 | 1281 | 4907  | 3372 | 16647 | 21632 | 7464  |
| Solyc04g074000.2.1 | -1.88555 | 9.067914 | 8.80E-08 | 1.20E-05 | 5501 | 13641 | 6455 | 40604 | 63650 | 31078 |
| Solyc02g079570.2.1 | -1.88393 | 5.857193 | 4.44E-08 | 6.80E-06 | 592  | 1066  | 1107 | 5799  | 6276  | 2440  |
| Solyc01g091840.2.1 | -1.88184 | 4.956407 | 2.10E-06 | 0.000182 | 310  | 820   | 369  | 3019  | 3673  | 1179  |
| Solyc06g062420.2.1 | -1.86332 | 3.495405 | 2.08E-05 | 0.001265 | 64   | 418   | 150  | 975   | 1307  | 543   |
| Solyc08g076390.2.1 | -1.86041 | 5.206335 | 5.43E-07 | 5.88E-05 | 313  | 927   | 665  | 4017  | 3940  | 1268  |
| Solyc10g080010.1.1 | -1.85584 | 4.697455 | 1.11E-06 | 0.000107 | 215  | 800   | 338  | 2416  | 3046  | 1076  |
| Solyc03g033840.2.1 | -1.84971 | 5.694322 | 6.24E-07 | 6.59E-05 | 580  | 1305  | 566  | 3948  | 6580  | 2621  |
| Solyc03g006700.2.1 | -1.84561 | 3.578677 | 2.73E-05 | 0.001598 | 75   | 407   | 183  | 898   | 1765  | 449   |
| Solyc04g008100.1.1 | -1.83001 | 4.712113 | 1.53E-05 | 0.000973 | 198  | 988   | 241  | 1579  | 3168  | 1790  |
| Solyc12g042480.1.1 | -1.82667 | 6.456892 | 1.61E-05 | 0.001012 | 1066 | 1570  | 1438 | 7512  | 12871 | 2576  |
| Solyc06g061170.2.1 | -1.82182 | 3.503222 | 6.78E-05 | 0.003242 | 131  | 255   | 154  | 1066  | 1452  | 363   |
| Solyc12g088040.1.1 | -1.82015 | 2.926494 | 0.000124 | 0.005402 | 60   | 252   | 96   | 524   | 1164  | 291   |
| Solyc11g005630.1.1 | -1.81628 | 6.513553 | 3.56E-06 | 0.000283 | 828  | 3015  | 943  | 5900  | 12177 | 5153  |
| Solyc05g056500.1.1 | -1.80939 | 2.994984 | 1.99E-05 | 0.001217 | 69   | 178   | 173  | 665   | 1097  | 277   |
| Solyc03g112970.1.1 | -1.80872 | 2.44893  | 5.59E-05 | 0.002758 | 62   | 114   | 88   | 508   | 594   | 237   |
| Solyc10g007900.2.1 | -1.80609 | 4.801888 | 4.95E-06 | 0.000377 | 228  | 907   | 376  | 2600  | 3433  | 1013  |
| Solyc01g104690.2.1 | -1.80314 | 5.305295 | 4.52E-05 | 0.002342 | 410  | 770   | 809  | 1962  | 7682  | 1208  |
| Solyc02g093050.2.1 | -1.79925 | 6.754901 | 6.24E-08 | 9.19E-06 | 1090 | 2343  | 2077 | 10103 | 12159 | 4623  |
| Solyc09g082890.1.1 | -1.79485 | 1.533228 | 0.000107 | 0.004767 | 22   | 79    | 55   | 251   | 289   | 153   |
| Solyc09g011740.2.1 | -1.7908  | 6.315601 | 1.02E-06 | 9.89E-05 | 824  | 2013  | 1221 | 6937  | 10378 | 2954  |
| Solyc01g097270.2.1 | -1.79031 | 8.132059 | 7.08E-05 | 0.003331 | 3986 | 4681  | 3689 | 20804 | 42662 | 9847  |
| Solyc03g119590.1.1 | -1.78972 | 4.423028 | 4.22E-05 | 0.002199 | 254  | 600   | 185  | 1846  | 2483  | 1002  |
| Solyc05g050380.2.1 | -1.7801  | 7.603615 | 6.85E-06 | 0.000498 | 2392 | 4634  | 2292 | 16384 | 24210 | 8393  |
| Solyc09g010780.2.1 | -1.77937 | 3.287837 | 1.39E-05 | 0.000906 | 89   | 277   | 154  | 973   | 974   | 426   |
| Solyc02g081360.2.1 | -1.77635 | 4.325984 | 8.06E-06 | 0.000575 | 272  | 380   | 269  | 1512  | 1560  | 1604  |
| Solyc02g093310.2.1 | -1.77597 | 3.210784 | 9.96E-06 | 0.000683 | 61   | 260   | 210  | 716   | 1257  | 378   |
| Solyc03g119810.1.1 | -1.76582 | 3.392078 | 3.67E-05 | 0.002001 | 98   | 217   | 244  | 1122  | 1123  | 337   |
| Solyc09g072810.2.1 | -1.76225 | 4.431567 | 2.89E-05 | 0.001669 | 237  | 211   | 643  | 1398  | 2972  | 1104  |
| Solyc07g055710.2.1 | -1.75956 | 5.103815 | 1.78E-05 | 0.001101 | 428  | 618   | 616  | 2441  | 5416  | 1139  |
| Solyc02g032950.2.1 | -1.75574 | 5.776611 | 2.94E-05 | 0.001681 | 643  | 1398  | 691  | 6129  | 5394  | 1853  |

|                     |          |          |          |          |       |       |       |       |       |       |
|---------------------|----------|----------|----------|----------|-------|-------|-------|-------|-------|-------|
| Solyc05g016310.1.1  | -1.75475 | 4.822566 | 5.28E-06 | 0.000397 | 214   | 943   | 459   | 2982  | 2861  | 1067  |
| Solyc10g011810.2.1  | -1.74739 | 6.174108 | 4.01E-08 | 6.31E-06 | 559   | 2107  | 1459  | 5448  | 9455  | 3314  |
| Solyc01g100010.2.1  | -1.74581 | 4.545067 | 2.08E-05 | 0.001263 | 237   | 732   | 268   | 2052  | 2886  | 905   |
| Solyc08g080640.1.1  | -1.74534 | 6.949763 | 0.000123 | 0.005384 | 1736  | 2930  | 1039  | 12212 | 11325 | 6146  |
| Solyc02g080070.2.1  | -1.74478 | 7.726405 | 2.79E-07 | 3.32E-05 | 2161  | 5517  | 3531  | 17084 | 26847 | 9283  |
| Solyc05g014380.2.1  | -1.74146 | 6.802273 | 3.99E-05 | 0.002127 | 1262  | 2981  | 1463  | 10554 | 14368 | 3330  |
| Solyc02g014030.1.1  | -1.73817 | 4.585571 | 9.94E-08 | 1.33E-05 | 207   | 674   | 459   | 1742  | 3160  | 1138  |
| Solyc01g098140.2.1  | -1.738   | 3.457717 | 4.20E-05 | 0.002195 | 51    | 421   | 212   | 816   | 1317  | 581   |
| Solyc06g076560.1.1  | -1.73328 | 2.816242 | 5.16E-05 | 0.002596 | 78    | 143   | 142   | 375   | 1057  | 362   |
| Solyc04g048900.2.1  | -1.73108 | 7.276449 | 3.56E-06 | 0.000283 | 2013  | 3129  | 2374  | 12734 | 19258 | 6768  |
| Solyc01g11350.2.1   | -1.73091 | 4.605593 | 0.00023  | 0.008983 | 106   | 870   | 570   | 3006  | 2047  | 764   |
| Solyc08g078050.1.1  | -1.72258 | 5.331661 | 4.39E-08 | 6.80E-06 | 415   | 805   | 933   | 3668  | 4336  | 1833  |
| Solyc04g011770.2.1  | -1.7216  | 2.928843 | 1.31E-05 | 0.00086  | 68    | 167   | 187   | 689   | 833   | 332   |
| Solyc11g005700.1.1  | -1.72051 | 3.587721 | 7.22E-06 | 0.000517 | 102   | 326   | 251   | 1209  | 1188  | 503   |
| Solyc02g081350.2.1  | -1.71996 | 2.102044 | 0.000136 | 0.005812 | 52    | 82    | 82    | 302   | 346   | 338   |
| Solyc01g109710.2.1  | -1.71803 | 6.459878 | 3.36E-05 | 0.001867 | 1259  | 1401  | 1442  | 7819  | 10941 | 3262  |
| Solyc02g082450.2.1  | -1.71718 | 4.738978 | 1.08E-05 | 0.000731 | 248   | 612   | 619   | 3025  | 2633  | 825   |
| Solyc01g089890.2.1  | -1.71211 | 4.444158 | 6.98E-06 | 0.000505 | 203   | 727   | 282   | 1644  | 2778  | 1009  |
| Solyc02g090490.2.1  | -1.70784 | 5.822385 | 2.95E-06 | 0.000242 | 575   | 1343  | 4725  | 7876  | 7876  | 1812  |
| Solyc02g079170.2.1  | -1.70549 | 7.078416 | 4.14E-05 | 0.002179 | 1916  | 2320  | 2157  | 14499 | 12610 | 5365  |
| Solyc04g074710.2.1  | -1.69789 | 2.371459 | 0.000247 | 0.009513 | 51    | 93    | 138   | 412   | 707   | 178   |
| Solyc02g086590.2.1  | -1.69626 | 5.108961 | 1.09E-06 | 0.000105 | 404   | 723   | 670   | 3011  | 4148  | 1384  |
| Solyc07g008140.2.1  | -1.69308 | 5.25997  | 3.23E-07 | 3.73E-05 | 208   | 1234  | 975   | 3237  | 3126  | 2579  |
| Solyc08g081490.2.1  | -1.69181 | 4.564312 | 8.65E-06 | 0.000609 | 253   | 672   | 354   | 2306  | 2545  | 913   |
| Solyc12g008500.1.1  | -1.68778 | 6.285641 | 2.99E-05 | 0.001701 | 1058  | 978   | 1785  | 7129  | 8924  | 3124  |
| Solyc03g112980.1.1  | -1.68321 | 2.24838  | 0.000182 | 0.007411 | 60    | 111   | 71    | 309   | 571   | 272   |
| Solyc09g009130.2.1  | -1.67796 | 5.046746 | 3.45E-06 | 0.000277 | 359   | 787   | 647   | 3655  | 2755  | 1383  |
| Solyc11g007420.1.1  | -1.67069 | 2.511389 | 3.77E-05 | 0.00204  | 55    | 155   | 110   | 501   | 548   | 298   |
| Solyc09g064780.2.1  | -1.66305 | 5.130757 | 2.51E-06 | 0.000212 | 431   | 840   | 564   | 2946  | 4150  | 1507  |
| Solyc01g112220.2.1  | -1.66254 | 4.405464 | 1.42E-06 | 0.000133 | 210   | 533   | 453   | 1781  | 2631  | 831   |
| Solyc02g079750.2.1  | -1.65998 | 5.716427 | 6.70E-05 | 0.003221 | 401   | 1675  | 1114  | 3024  | 9349  | 1551  |
| Solyc04g056340.2.1  | -1.65828 | 4.081188 | 4.18E-05 | 0.002193 | 205   | 391   | 298   | 1316  | 2384  | 574   |
| Solyc12g008960.1.1  | -1.65775 | 4.892014 | 2.40E-05 | 0.00143  | 223   | 1168  | 420   | 2566  | 3472  | 1240  |
| Solyc04g0077310.2.1 | -1.65604 | 4.051723 | 0.000143 | 0.006046 | 188   | 418   | 293   | 1749  | 1856  | 451   |
| Solyc07g043250.1.1  | -1.65286 | 5.507337 | 2.16E-08 | 3.75E-06 | 406   | 1312  | 949   | 3626  | 5315  | 2176  |
| Solyc04g074480.2.1  | -1.65224 | 9.158566 | 8.33E-07 | 8.31E-05 | 6762  | 10729 | 13069 | 49287 | 63610 | 26110 |
| Solyc02g093230.2.1  | -1.65109 | 3.929276 | 0.000107 | 0.004751 | 140   | 534   | 212   | 1289  | 1965  | 534   |
| Solyc03g111980.2.1  | -1.64949 | 7.291422 | 4.82E-05 | 0.002465 | 1801  | 4287  | 2422  | 15892 | 17665 | 4832  |
| Solyc02g085830.2.1  | -1.63466 | 3.684399 | 0.000136 | 0.005812 | 161   | 220   | 299   | 1344  | 1261  | 461   |
| Solyc03g078490.2.1  | -1.63289 | 9.415741 | 2.59E-06 | 0.000216 | 7645  | 19113 | 11164 | 64250 | 67217 | 31529 |
| Solyc08g014150.2.1  | -1.62819 | 5.330675 | 8.99E-06 | 0.000628 | 509   | 892   | 735   | 3126  | 5460  | 1481  |
| Solyc02g088090.1.1  | -1.62798 | 7.043239 | 6.09E-06 | 0.000451 | 1067  | 4786  | 2228  | 12091 | 14138 | 5610  |
| Solyc05g016060.2.1  | -1.62696 | 5.30508  | 4.48E-05 | 0.002326 | 346   | 1568  | 463   | 3253  | 4651  | 1745  |
| Solyc05g052750.2.1  | -1.61987 | 4.614855 | 6.22E-08 | 9.19E-06 | 225   | 698   | 532   | 1916  | 2669  | 1297  |
| Solyc02g067530.2.1  | -1.61069 | 5.063088 | 4.27E-08 | 6.68E-06 | 292   | 900   | 831   | 2765  | 3645  | 1626  |
| Solyc06g074530.1.1  | -1.61009 | 5.845606 | 6.93E-07 | 7.24E-05 | 576   | 1764  | 1023  | 4404  | 7083  | 2605  |
| Solyc02g093860.2.1  | -1.60153 | 7.301753 | 8.05E-07 | 8.07E-05 | 1305  | 4559  | 3896  | 14788 | 16321 | 6658  |
| Solyc07g049660.2.1  | -1.59977 | 7.174604 | 1.43E-05 | 0.000925 | 1786  | 4010  | 2117  | 12163 | 16998 | 6026  |
| Solyc10g012370.2.1  | -1.59869 | 7.494071 | 3.40E-05 | 0.001883 | 2236  | 3541  | 4064  | 14863 | 24425 | 5762  |
| Solyc05g015840.2.1  | -1.58901 | 4.121274 | 3.59E-05 | 0.001971 | 209   | 502   | 260   | 1250  | 2289  | 748   |
| Solyc09g075120.2.1  | -1.58825 | 7.007959 | 0.000117 | 0.005146 | 1990  | 2156  | 2239  | 11827 | 14293 | 4960  |
| Solyc08g077740.1.1  | -1.58623 | 1.97615  | 0.000199 | 0.007986 | 42    | 98    | 86    | 323   | 362   | 222   |
| Solyc02g093270.2.1  | -1.58537 | 7.899808 | 7.83E-07 | 7.90E-05 | 2455  | 6192  | 5432  | 23324 | 20571 | 11727 |
| Solyc04g009900.2.1  | -1.57889 | 5.341595 | 9.28E-05 | 0.004226 | 349   | 1138  | 1029  | 4822  | 3596  | 1127  |
| Solyc04g006940.2.1  | -1.57309 | 5.317788 | 9.09E-06 | 0.000633 | 435   | 1235  | 659   | 4003  | 3622  | 1715  |
| Solyc11g015900.1.1  | -1.57027 | 3.661002 | 0.000104 | 0.004674 | 114   | 480   | 185   | 1102  | 1268  | 611   |
| Solyc03g083440.2.1  | -1.56724 | 6.244264 | 1.27E-05 | 0.000836 | 929   | 1864  | 1467  | 7065  | 8467  | 2742  |
| Solyc09g075020.2.1  | -1.56666 | 9.929299 | 1.20E-06 | 0.000114 | 11668 | 23140 | 20483 | 88755 | 88934 | 50018 |
| Solyc02g091650.2.1  | -1.56451 | 4.44461  | 1.51E-05 | 0.000965 | 230   | 657   | 403   | 2076  | 2250  | 850   |
| Solyc07g008590.1.1  | -1.56407 | 3.864714 | 3.63E-05 | 0.001987 | 186   | 377   | 245   | 1150  | 1692  | 660   |
| Solyc01g005920.2.1  | -1.56186 | 3.488472 | 4.92E-05 | 0.002511 | 91    | 278   | 339   | 886   | 1422  | 432   |
| Solyc09g083060.2.1  | -1.5524  | 5.308148 | 1.23E-07 | 1.61E-05 | 395   | 1121  | 892   | 3397  | 4034  | 1924  |
| Solyc02g087740.2.1  | -1.5498  | 2.574052 | 0.000123 | 0.005384 | 67    | 156   | 124   | 476   | 444   | 413   |
| Solyc09g091660.2.1  | -1.53826 | 9.373885 | 2.43E-06 | 0.000206 | 7573  | 17984 | 13509 | 53083 | 78243 | 28763 |
| Solyc05g050360.2.1  | -1.53718 | 5.992009 | 1.97E-05 | 0.001211 | 743   | 1983  | 999   | 4807  | 8167  | 2582  |
| Solyc12g087920.1.1  | -1.52481 | 4.744781 | 5.90E-07 | 6.33E-05 | 313   | 574   | 691   | 2017  | 2914  | 1409  |
| Solyc09g090730.1.1  | -1.5236  | 6.565731 | 9.90E-06 | 0.000681 | 1121  | 2751  | 1695  | 7712  | 11262 | 3869  |
| Solyc12g040570.1.1  | -1.51485 | 3.431398 | 1.89E-05 | 0.001164 | 104   | 339   | 232   | 646   | 1220  | 677   |
| Solyc10g006710.2.1  | -1.51063 | 4.521889 | 0.000145 | 0.006099 | 194   | 972   | 332   | 1666  | 2915  | 988   |
| Solyc11g056620.1.1  | -1.50991 | 4.788202 | 8.73E-06 | 0.000613 | 359   | 677   | 546   | 2518  | 2637  | 1273  |
| Solyc02g062800.2.1  | -1.50762 | 5.437121 | 3.18E-05 | 0.001781 | 554   | 1348  | 602   | 3913  | 3982  | 2131  |
| Solyc01g006150.2.1  | -1.50751 | 6.544912 | 8.64E-07 | 8.56E-05 | 774   | 3135  | 2221  | 7583  | 9907  | 4541  |
| Solyc07g054830.2.1  | -1.50454 | 5.866552 | 7.39E-06 | 0.000528 | 720   | 1543  | 1157  | 5095  | 6399  | 2368  |
| Solyc06g082590.1.1  | -1.50164 | 6.385495 | 0.000208 | 0.008253 | 1221  | 2118  | 1239  | 7370  | 9888  | 2872  |
| Solyc06g050810.2.1  | -1.50153 | 4.680721 | 5.97E-07 | 6.36E-05 | 240   | 785   | 612   | 1968  | 2830  | 1268  |
| Solyc03g113040.2.1  | -1.4983  | 3.764723 | 3.93E-05 | 0.002108 | 160   | 359   | 293   | 1155  | 1474  | 578   |
| Solyc04g049090.2.1  | -1.4955  | 8.178793 | 1.39E-05 | 0.000906 | 3591  | 7973  | 5508  | 22977 | 34933 | 11837 |
| Solyc12g094650.1.1  | -1.49279 | 6.536843 | 4.02E-05 | 0.002138 | 1204  | 2863  | 1326  | 6965  | 10892 | 4325  |
| Solyc02g083460.2.1  | -1.47936 | 6.709729 | 1.45E-05 | 0.000931 | 1378  | 2655  | 2058  | 9950  | 8816  | 5128  |
| Solyc08g069060.2.1  | -1.47356 | 6.508902 | 0.000164 | 0.006758 | 1321  | 1851  | 1927  | 9316  | 8639  | 3230  |
| Solyc04g074030.2.1  | -1.46825 | 6.462984 | 6.97E-05 | 0.003307 | 995   | 3337  | 1151  | 5383  | 10312 | 5176  |
| Solyc03g098730.1.1  | -1.4658  | 6.308583 | 5.95E-05 | 0.002891 | 670   | 3428  | 1233  | 4753  | 9570  | 4527  |
| Solyc01g110960.2.1  | -1.46193 | 2.49071  | 0.000175 | 0.007163 | 62    | 162   | 125   | 370   | 595   | 332   |

|                    |          |          |          |          |      |       |       |       |        |       |
|--------------------|----------|----------|----------|----------|------|-------|-------|-------|--------|-------|
| Solyc04g005160.1.1 | -1.45941 | 8.113535 | 1.49E-05 | 0.00095  | 3201 | 8825  | 5130  | 22380 | 31295  | 11918 |
| Solyc02g087580.2.1 | -1.45816 | 2.925939 | 0.000164 | 0.006777 | 74   | 178   | 237   | 479   | 969    | 367   |
| Solyc05g052210.2.1 | -1.45601 | 4.721486 | 2.99E-06 | 0.000245 | 299  | 715   | 630   | 2084  | 2943   | 1187  |
| Solyc02g089060.2.1 | -1.4527  | 4.554902 | 2.74E-05 | 0.0016   | 147  | 903   | 623   | 1606  | 2808   | 1167  |
| Solyc05g007150.2.1 | -1.44494 | 5.708623 | 1.51E-07 | 1.94E-05 | 504  | 1424  | 1509  | 3028  | 6130   | 3159  |
| Solyc06g063210.2.1 | -1.4449  | 4.977386 | 2.68E-05 | 0.001575 | 410  | 943   | 536   | 2711  | 3095   | 1472  |
| Solyc03g005470.2.1 | -1.44485 | 6.95094  | 2.07E-06 | 0.000181 | 1276 | 3872  | 2856  | 9445  | 14113  | 5670  |
| Solyc06g063180.1.1 | -1.44479 | 5.349003 | 2.56E-06 | 0.000215 | 354  | 1329  | 1065  | 2940  | 5034   | 1772  |
| Solyc10g038080.1.1 | -1.44291 | 4.205227 | 3.63E-05 | 0.001987 | 113  | 602   | 605   | 1362  | 2074   | 898   |
| Solyc03g111800.2.1 | -1.44153 | 6.316887 | 3.14E-06 | 0.000254 | 974  | 2041  | 1881  | 5159  | 10120  | 3825  |
| Solyc08g061250.2.1 | -1.44091 | 3.462353 | 3.55E-05 | 0.001953 | 114  | 338   | 258   | 813   | 891    | 752   |
| Solyc05g051570.2.1 | -1.42831 | 4.88234  | 1.78E-05 | 0.001101 | 367  | 846   | 604   | 2391  | 3314   | 1229  |
| Solyc09g011580.2.1 | -1.42632 | 7.281525 | 3.15E-05 | 0.001777 | 1972 | 2561  | 4969  | 8496  | 16887  | 10638 |
| Solyc08g078040.2.1 | -1.42579 | 6.964782 | 2.89E-06 | 0.000238 | 1538 | 2563  | 3620  | 9582  | 12228  | 6881  |
| Solyc02g086270.2.1 | -1.40911 | 3.87264  | 0.000224 | 0.008798 | 110  | 603   | 323   | 1225  | 1549   | 625   |
| Solyc08g078310.2.1 | -1.40484 | 4.551565 | 6.35E-05 | 0.003068 | 310  | 601   | 524   | 1638  | 3061   | 922   |
| Solyc03g118720.2.1 | -1.4035  | 4.9374   | 8.43E-06 | 0.000596 | 320  | 801   | 901   | 2210  | 3801   | 1273  |
| Solyc04g064530.1.1 | -1.39854 | 6.277798 | 8.17E-05 | 0.003766 | 1079 | 2337  | 1267  | 5702  | 9216   | 3391  |
| Solyc08g082820.2.1 | -1.39632 | 8.878587 | 8.00E-05 | 0.003715 | 3582 | 14173 | 15884 | 18257 | 56479  | 35035 |
| Solyc03g006080.2.1 | -1.39458 | 4.419786 | 5.06E-05 | 0.002556 | 250  | 640   | 486   | 1522  | 2747   | 839   |
| Solyc07g047800.2.1 | -1.39258 | 8.634498 | 2.56E-05 | 0.001516 | 5565 | 9488  | 8917  | 29701 | 44957  | 18324 |
| Solyc06g053710.2.1 | -1.39248 | 7.135715 | 0.000212 | 0.008392 | 2207 | 2768  | 3081  | 13664 | 10593  | 6993  |
| Solyc04g007580.1.1 | -1.3887  | 5.631885 | 1.82E-06 | 0.000164 | 564  | 1666  | 1004  | 3592  | 5103   | 2693  |
| Solyc08g065480.2.1 | -1.38739 | 6.612251 | 1.60E-05 | 0.001005 | 1202 | 2687  | 2333  | 8570  | 9887   | 4093  |
| Solyc07g043560.2.1 | -1.37818 | 7.012666 | 6.94E-06 | 0.000503 | 1128 | 3877  | 4062  | 6359  | 13331  | 9673  |
| Solyc10g055680.1.1 | -1.37717 | 5.978098 | 0.000234 | 0.009106 | 463  | 2777  | 1354  | 5672  | 6464   | 2418  |
| Solyc10g074570.1.1 | -1.37238 | 5.746751 | 2.48E-05 | 0.00147  | 721  | 1532  | 1091  | 4594  | 5436   | 2304  |
| Solyc10g012170.2.1 | -1.37068 | 4.077359 | 5.95E-05 | 0.002891 | 183  | 500   | 442   | 1279  | 2013   | 672   |
| Solyc05g052280.2.1 | -1.35962 | 3.519045 | 0.000144 | 0.006099 | 124  | 380   | 265   | 848   | 1274   | 526   |
| Solyc06g082080.2.1 | -1.34988 | 3.544356 | 0.000137 | 0.005858 | 116  | 383   | 305   | 766   | 1411   | 547   |
| Solyc06g050930.2.1 | -1.34842 | 5.315798 | 2.86E-06 | 0.000236 | 461  | 1308  | 882   | 2982  | 3913   | 2134  |
| Solyc10g045420.1.1 | -1.34806 | 4.600789 | 5.36E-05 | 0.002663 | 276  | 805   | 541   | 2040  | 2571   | 974   |
| Solyc01g087870.1.1 | -1.34402 | 4.863069 | 1.80E-06 | 0.000163 | 281  | 886   | 867   | 1733  | 2992   | 1873  |
| Solyc06g065560.1.1 | -1.34376 | 5.95162  | 4.70E-05 | 0.002415 | 685  | 2050  | 1452  | 4941  | 7248   | 2293  |
| Solyc09g090040.2.1 | -1.33774 | 5.524651 | 0.000113 | 0.005002 | 604  | 1019  | 1330  | 3779  | 5421   | 1578  |
| Solyc12g009550.1.1 | -1.3283  | 3.622793 | 0.000164 | 0.006758 | 121  | 354   | 387   | 745   | 1552   | 587   |
| Solyc06g007930.2.1 | -1.32743 | 6.066642 | 1.11E-05 | 0.000744 | 682  | 2208  | 1795  | 5258  | 7368   | 2836  |
| Solyc04g081510.2.1 | -1.32306 | 5.455167 | 7.67E-05 | 0.003572 | 539  | 1194  | 1176  | 3942  | 4617   | 1521  |
| Solyc09g009840.1.1 | -1.32077 | 5.628444 | 6.98E-05 | 0.003307 | 600  | 1671  | 1034  | 4070  | 5520   | 1853  |
| Solyc12g009220.1.1 | -1.3157  | 7.310873 | 6.26E-05 | 0.003028 | 1895 | 5011  | 3790  | 11794 | 19254  | 6121  |
| Solyc06g071280.2.1 | -1.31469 | 6.423564 | 2.79E-05 | 0.001619 | 1110 | 2771  | 1757  | 6272  | 9307   | 4093  |
| Solyc01g007990.2.1 | -1.30139 | 5.277687 | 1.88E-06 | 0.000169 | 453  | 1139  | 1059  | 2584  | 4110   | 2112  |
| Solyc01g079610.2.1 | -1.29213 | 7.063138 | 1.01E-05 | 0.000694 | 1169 | 4388  | 4334  | 7376  | 14600  | 8383  |
| Solyc04g081570.2.1 | -1.29103 | 9.854057 | 3.65E-05 | 0.001992 | 8722 | 32168 | 26592 | 43373 | 99375  | 66035 |
| Solyc05g013750.2.1 | -1.2803  | 7.227686 | 8.99E-05 | 0.004118 | 1876 | 4229  | 4061  | 12248 | 16547  | 5608  |
| Solyc09g089640.2.1 | -1.27601 | 5.531298 | 6.94E-05 | 0.0033   | 627  | 1454  | 983   | 3929  | 4466   | 1984  |
| Solyc02g077470.2.1 | -1.27361 | 4.715043 | 4.11E-05 | 0.002176 | 311  | 730   | 776   | 2065  | 2792   | 1108  |
| Solyc06g009140.2.1 | -1.27138 | 8.943606 | 4.67E-05 | 0.002405 | 6796 | 12917 | 12754 | 40197 | 46230  | 23484 |
| Solyc09g090070.1.1 | -1.26817 | 7.2606   | 0.00013  | 0.005626 | 1964 | 5111  | 3344  | 12155 | 16753  | 6121  |
| Solyc12g094660.1.1 | -1.26662 | 6.625375 | 5.95E-05 | 0.002891 | 1341 | 2679  | 2550  | 7993  | 10042  | 4251  |
| Solyc03g114600.2.1 | -1.2597  | 4.852495 | 9.40E-05 | 0.004253 | 356  | 816   | 821   | 2501  | 2859   | 1132  |
| Solyc02g067660.2.1 | -1.25619 | 4.570479 | 0.000215 | 0.008488 | 291  | 826   | 531   | 1550  | 2999   | 973   |
| Solyc02g080010.2.1 | -1.2471  | 6.751567 | 0.00013  | 0.005626 | 822  | 4315  | 3268  | 7038  | 12679  | 5003  |
| Solyc01g067070.2.1 | -1.2451  | 5.088298 | 0.000144 | 0.006099 | 343  | 1058  | 1100  | 2635  | 3992   | 1202  |
| Solyc08g081230.1.1 | -1.23942 | 5.897153 | 6.74E-05 | 0.003231 | 572  | 2164  | 1721  | 3581  | 7579   | 2667  |
| Solyc03g082920.2.1 | -1.23363 | 9.259365 | 4.12E-05 | 0.002179 | 5847 | 20096 | 20141 | 30689 | 68049  | 39221 |
| Solyc04g005550.1.1 | -1.22178 | 4.579466 | 0.000116 | 0.00514  | 203  | 898   | 746   | 1798  | 2479   | 1079  |
| Solyc03g034250.2.1 | -1.21931 | 4.487929 | 0.000206 | 0.008192 | 268  | 620   | 713   | 1904  | 2215   | 882   |
| Solyc04g011520.2.1 | -1.21813 | 5.720622 | 5.44E-05 | 0.002697 | 708  | 1527  | 1403  | 4166  | 5463   | 2200  |
| Solyc05g014980.2.1 | -1.2154  | 6.098961 | 2.11E-05 | 0.001277 | 817  | 2145  | 1957  | 5266  | 6774   | 3201  |
| Solyc08g066210.2.1 | -1.20525 | 5.646234 | 7.05E-05 | 0.003324 | 619  | 1687  | 1274  | 3606  | 5746   | 2029  |
| Solyc05g006510.1.1 | -1.20459 | 4.690075 | 0.000231 | 0.009018 | 244  | 1026  | 704   | 1526  | 3246   | 1162  |
| Solyc05g008310.2.1 | -1.19526 | 4.276382 | 0.000141 | 0.005973 | 206  | 686   | 556   | 1437  | 2013   | 868   |
| Solyc10g084400.1.1 | -1.19508 | 7.161639 | 8.04E-05 | 0.003719 | 1502 | 4519  | 4745  | 9631  | 16858  | 6111  |
| Solyc03g118040.2.1 | -1.19346 | 9.88685  | 4.78E-05 | 0.002451 | 9197 | 30681 | 32724 | 51434 | 101827 | 57627 |
| Solyc10g080770.1.1 | -1.18355 | 7.099958 | 0.000127 | 0.005512 | 1806 | 4169  | 3769  | 10950 | 13842  | 5701  |
| Solyc09g075450.2.1 | -1.18351 | 6.742211 | 0.000123 | 0.005384 | 1405 | 3072  | 3131  | 7303  | 12461  | 4517  |
| Solyc09g007910.2.1 | -1.17979 | 6.960264 | 5.88E-05 | 0.002877 | 1145 | 3758  | 4822  | 8935  | 11696  | 6621  |
| Solyc02g064680.2.1 | -1.17411 | 7.400055 | 0.000118 | 0.005181 | 1867 | 5805  | 5032  | 14786 | 13007  | 8346  |
| Solyc02g087330.2.1 | -1.15924 | 5.564918 | 6.60E-05 | 0.003181 | 505  | 1674  | 1441  | 3257  | 5392   | 1999  |
| Solyc01g104050.2.1 | -1.15744 | 5.384127 | 0.000228 | 0.008921 | 605  | 1160  | 1152  | 3330  | 4212   | 1689  |
| Solyc05g053930.2.1 | -1.15673 | 5.774164 | 5.93E-05 | 0.002891 | 676  | 1570  | 1781  | 3674  | 6157   | 2437  |
| Solyc11g017270.1.1 | -1.14924 | 6.765545 | 0.000182 | 0.007411 | 1467 | 3369  | 3001  | 8699  | 10582  | 4616  |
| Solyc08g079420.2.1 | -1.14797 | 6.325459 | 0.000232 | 0.009018 | 1080 | 2014  | 2680  | 5694  | 8926   | 3330  |
| Solyc01g100200.2.1 | -1.14491 | 6.314436 | 9.29E-05 | 0.004226 | 1038 | 2743  | 2033  | 5709  | 8116   | 3714  |
| Solyc06g009110.2.1 | -1.13672 | 5.129771 | 0.000206 | 0.008194 | 497  | 1091  | 910   | 2661  | 3487   | 1533  |
| Solyc06g073990.1.1 | -1.12462 | 5.021323 | 5.04E-05 | 0.002556 | 395  | 955   | 1096  | 2214  | 2716   | 1968  |
| Solyc04g079760.2.1 | -1.12031 | 7.857918 | 8.27E-05 | 0.003807 | 2539 | 7004  | 8501  | 16416 | 21096  | 12465 |
| Solyc10g051020.1.1 | -1.1147  | 7.730382 | 0.000146 | 0.006153 | 2248 | 8397  | 6097  | 16031 | 17518  | 11594 |
| Solyc03g115070.1.1 | -1.08009 | 4.700482 | 0.00017  | 0.006991 | 322  | 845   | 835   | 1817  | 2556   | 1246  |
| Solyc08g080680.2.1 | -1.07571 | 5.035458 | 0.000219 | 0.008629 | 396  | 1152  | 1004  | 2131  | 3606   | 1472  |
| Solyc12g099100.1.1 | -1.05953 | 6.380858 | 0.000133 | 0.00573  | 972  | 2968  | 2675  | 6055  | 7628   | 4101  |
| Solyc01g090430.2.1 | -1.05497 | 5.220277 | 0.000214 | 0.008481 | 529  | 1167  | 1104  | 2606  | 3585   | 1803  |

|                    |          |          |          |          |       |       |       |       |       |       |
|--------------------|----------|----------|----------|----------|-------|-------|-------|-------|-------|-------|
| Solyc03g007170.2.1 | -1.03205 | 5.799557 | 0.000127 | 0.005513 | 711   | 1785  | 1885  | 3739  | 5304  | 2825  |
| Solyc06g054010.2.1 | 1.00571  | 5.541305 | 0.000246 | 0.009508 | 1122  | 3382  | 3100  | 1373  | 1748  | 1614  |
| Solyc11g069190.1.1 | 1.007456 | 5.896831 | 0.000201 | 0.008028 | 1331  | 4248  | 4338  | 1907  | 2696  | 1633  |
| Solyc03g007370.2.1 | 1.048528 | 5.596316 | 0.000171 | 0.006999 | 1372  | 2797  | 3456  | 1330  | 1948  | 1598  |
| Solyc04g077340.2.1 | 1.11929  | 4.540935 | 0.000131 | 0.005666 | 485   | 1795  | 1773  | 740   | 961   | 599   |
| Solyc09g082980.2.1 | 1.12179  | 5.656813 | 2.21E-05 | 0.00133  | 1184  | 3809  | 3575  | 1382  | 2102  | 1484  |
| Solyc06g073180.2.1 | 1.126168 | 7.367213 | 0.000106 | 0.004733 | 3907  | 11075 | 13024 | 4776  | 5787  | 5297  |
| Solyc07g056240.2.1 | 1.144069 | 4.447126 | 0.000157 | 0.00651  | 540   | 1443  | 1687  | 581   | 791   | 712   |
| Solyc02g082760.2.1 | 1.167022 | 8.419747 | 0.000146 | 0.006126 | 9373  | 18847 | 28211 | 9022  | 12316 | 11057 |
| Solyc09g011010.2.1 | 1.17246  | 5.283084 | 0.000224 | 0.008798 | 763   | 2696  | 3499  | 782   | 1774  | 1231  |
| Solyc06g075660.2.1 | 1.183053 | 4.882182 | 0.000251 | 0.00966  | 487   | 2613  | 2349  | 839   | 1042  | 889   |
| Solyc03g082960.2.1 | 1.198063 | 6.040137 | 0.000187 | 0.007595 | 1615  | 4238  | 5415  | 1352  | 2315  | 2425  |
| Solyc08g005560.2.1 | 1.233751 | 5.415953 | 8.03E-05 | 0.003719 | 1174  | 2450  | 3528  | 803   | 2048  | 1235  |
| Solyc02g087060.2.1 | 1.237451 | 3.99613  | 0.000226 | 0.008876 | 388   | 1025  | 1348  | 494   | 461   | 477   |
| Solyc07g032380.2.1 | 1.288015 | 5.470253 | 7.32E-05 | 0.003428 | 819   | 3820  | 3612  | 872   | 1622  | 1481  |
| Solyc10g007110.2.1 | 1.329553 | 3.697684 | 0.000127 | 0.005512 | 399   | 972   | 786   | 269   | 512   | 376   |
| Solyc05g013380.2.1 | 1.33709  | 8.172046 | 4.19E-05 | 0.002193 | 8050  | 15480 | 25884 | 6060  | 10042 | 9101  |
| Solyc08g075120.2.1 | 1.33742  | 3.76131  | 0.000137 | 0.005861 | 261   | 973   | 1290  | 317   | 563   | 339   |
| Solyc03g098320.2.1 | 1.369254 | 5.833457 | 1.71E-05 | 0.001073 | 1089  | 4750  | 4913  | 1058  | 2423  | 1581  |
| Solyc12g040790.1.1 | 1.418508 | 6.588936 | 3.92E-05 | 0.002108 | 1499  | 9234  | 8243  | 1956  | 3551  | 2691  |
| Solyc11g012850.1.1 | 1.442782 | 6.16101  | 1.06E-06 | 0.000103 | 1667  | 5898  | 5626  | 1526  | 2300  | 2090  |
| Solyc05g011890.1.1 | 1.443192 | 7.823038 | 1.44E-05 | 0.000928 | 4382  | 17199 | 21724 | 7451  | 6272  | 4878  |
| Solyc08g075490.2.1 | 1.451398 | 5.537502 | 3.16E-05 | 0.001777 | 1659  | 2786  | 3108  | 680   | 1763  | 1451  |
| Solyc05g055840.2.1 | 1.469618 | 3.511831 | 0.00025  | 0.009624 | 243   | 716   | 1184  | 225   | 310   | 374   |
| Solyc03g120420.2.1 | 1.504012 | 4.296646 | 0.000148 | 0.006211 | 764   | 1022  | 1342  | 523   | 380   | 598   |
| Solyc05g005960.2.1 | 1.504922 | 6.06359  | 3.24E-05 | 0.001814 | 1327  | 5183  | 6388  | 1041  | 1982  | 2265  |
| Solyc01g107460.2.1 | 1.552098 | 7.050857 | 0.000105 | 0.004721 | 1926  | 8948  | 16168 | 3349  | 3039  | 3680  |
| Solyc05g009080.2.1 | 1.571707 | 4.384785 | 8.13E-06 | 0.000579 | 478   | 1402  | 2084  | 340   | 660   | 620   |
| Solyc11g072110.1.1 | 1.59079  | 3.906978 | 0.00014  | 0.005973 | 329   | 861   | 1687  | 266   | 346   | 497   |
| Solyc12g099930.1.1 | 1.594774 | 8.580382 | 5.78E-05 | 0.002836 | 8956  | 25559 | 38273 | 5717  | 8713  | 13695 |
| Solyc06g072710.2.1 | 1.608997 | 5.789111 | 0.000242 | 0.009349 | 1061  | 3704  | 6180  | 594   | 1481  | 2020  |
| Solyc08g065220.2.1 | 1.61024  | 8.887752 | 3.07E-05 | 0.001742 | 13114 | 27844 | 45771 | 7145  | 11199 | 16376 |
| Solyc02g087840.2.1 | 1.630282 | 2.100895 | 0.00014  | 0.005965 | 127   | 314   | 330   | 121   | 96    | 97    |
| Solyc03g112760.2.1 | 1.663908 | 5.843272 | 0.00012  | 0.005289 | 1016  | 4066  | 6559  | 546   | 2060  | 1726  |
| Solyc04g054740.2.1 | 1.688605 | 9.516011 | 2.82E-05 | 0.001633 | 27568 | 41235 | 54653 | 17124 | 11110 | 21877 |
| Solyc08g082590.2.1 | 1.707097 | 5.496629 | 1.96E-06 | 0.000174 | 737   | 3370  | 5230  | 888   | 1173  | 1164  |
| Solyc02g037550.2.1 | 1.734469 | 5.653429 | 0.000188 | 0.00762  | 1468  | 3360  | 4502  | 2186  | 851   | 461   |
| Solyc09g011080.2.1 | 1.757379 | 4.882802 | 0.000226 | 0.008877 | 776   | 932   | 3911  | 839   | 474   | 665   |
| Solyc02g072540.2.1 | 1.796279 | 5.201799 | 8.54E-06 | 0.000602 | 911   | 2707  | 3574  | 441   | 755   | 1230  |
| Solyc10g083940.1.1 | 1.921586 | 1.84771  | 9.19E-05 | 0.004192 | 98    | 319   | 283   | 93    | 122   | 29    |
| Solyc03g123580.2.1 | 1.979813 | 1.266283 | 0.0002   | 0.008015 | 76    | 220   | 158   | 29    | 47    | 68    |
| Solyc02g063030.2.1 | 2.013739 | 3.624256 | 3.38E-06 | 0.000272 | 183   | 924   | 1601  | 191   | 329   | 244   |
| Solyc03g025710.2.1 | 2.13995  | 4.212043 | 0.000239 | 0.009242 | 218   | 1543  | 2494  | 222   | 169   | 569   |
| Solyc01g102610.2.1 | 2.141276 | 6.227184 | 2.80E-08 | 4.54E-06 | 1357  | 5313  | 9731  | 1103  | 1467  | 1618  |
| Solyc04g080040.2.1 | 2.306184 | 4.695605 | 9.06E-09 | 1.72E-06 | 783   | 1876  | 2595  | 366   | 292   | 601   |
| Solyc10g084430.1.1 | 3.06431  | 0.961693 | 7.14E-07 | 7.40E-05 | 34    | 144   | 285   | 16    | 22    | 24    |
| Solyc02g078150.2.1 | 3.63357  | 2.683671 | 9.23E-06 | 0.00064  | 559   | 183   | 131   | 26    | 101   | 36    |
| Solyc05g007080.2.1 | 4.529816 | -1.54383 | 1.13E-05 | 0.000758 | 14    | 23    | 35    | 0     | 3     | 1     |
| RRNA_11_20         | 7.863301 | 6.037138 | 1.59E-05 | 0.001    | 7248  | 56    | 43    | 58    | 7     | 15    |
| Solyc11g027710.1.1 | 13.70892 | 4.158088 | 4.43E-05 | 0.0023   | 2002  | 0     | 0     | 0     | 0     | 0     |



**Supplementary Table S5:** GO enrichment analysis. *S. lycopersicum* leaf tissue during *P. infestans* invasion at 24 hpi. Gene to GO BP Conditional test for over-representation

| GOBPID     | Pvalue | OddsRatio | ExpCount | Count | Size | Term                                                                                    |
|------------|--------|-----------|----------|-------|------|-----------------------------------------------------------------------------------------|
| GO:0019605 | 0.000  | 804.489   | 0        | 2     | 7    | <a href="#">butyrate metabolic process</a>                                              |
| GO:0046916 | 0.002  | 35.384    | 0        | 2     | 115  | <a href="#">cellular transition metal ion homeostasis</a>                               |
| GO:0051707 | 0.002  | 9.532     | 1        | 4     | 1028 | <a href="#">response to other organism</a>                                              |
| GO:0071395 | 0.003  | 31.711    | 0        | 2     | 128  | <a href="#">cellular response to jasmonic acid stimulus</a>                             |
| GO:0009607 | 0.003  | 8.609     | 1        | 4     | 1131 | <a href="#">response to biotic stimulus</a>                                             |
| GO:0007568 | 0.004  | 25.799    | 0        | 2     | 175  | <a href="#">aging</a>                                                                   |
| GO:0030003 | 0.005  | 23.035    | 0        | 2     | 175  | <a href="#">cellular cation homeostasis</a>                                             |
| GO:0080187 | 0.005  | 258.557   | 0        | 1     | 8    | <a href="#">floral organ senescence</a>                                                 |
| GO:0055065 | 0.006  | 19.795    | 0        | 2     | 203  | <a href="#">metal ion homeostasis</a>                                                   |
| GO:0006955 | 0.007  | 9.881     | 0        | 3     | 665  | <a href="#">immune response</a>                                                         |
| GO:1990169 | 0.007  | 180.960   | 0        | 1     | 11   | <a href="#">stress response to copper ion</a>                                           |
| GO:0050832 | 0.007  | 19.742    | 0        | 2     | 228  | <a href="#">defense response to fungus</a>                                              |
| GO:0009751 | 0.007  | 18.847    | 0        | 2     | 213  | <a href="#">response to salicylic acid</a>                                              |
| GO:1900056 | 0.008  | 150.783   | 0        | 1     | 13   | <a href="#">negative regulation of leaf senescence</a>                                  |
| GO:0009605 | 0.009  | 6.569     | 1        | 4     | 1453 | <a href="#">response to external stimulus</a>                                           |
| GO:0055082 | 0.009  | 16.613    | 0        | 2     | 241  | <a href="#">cellular chemical homeostasis</a>                                           |
| GO:0010623 | 0.009  | 129.229   | 0        | 1     | 15   | <a href="#">developmental programmed cell death</a>                                     |
| GO:0071407 | 0.009  | 16.134    | 0        | 2     | 248  | <a href="#">cellular response to organic cyclic compound</a>                            |
| GO:0030001 | 0.010  | 15.808    | 0        | 2     | 253  | <a href="#">metal ion transport</a>                                                     |
| GO:0009750 | 0.012  | 95.195    | 0        | 1     | 20   | <a href="#">response to fructose</a>                                                    |
| GO:0009626 | 0.012  | 14.096    | 0        | 2     | 283  | <a href="#">plant-type hypersensitive response</a>                                      |
| GO:0050801 | 0.014  | 13.057    | 0        | 2     | 305  | <a href="#">ion homeostasis</a>                                                         |
| GO:0009862 | 0.014  | 78.622    | 0        | 1     | 24   | <a href="#">systemic acquired resistance, salicylic acid mediated signaling pathway</a> |
| GO:0009864 | 0.016  | 69.538    | 0        | 1     | 27   | <a href="#">induced systemic resistance, jasmonic acid mediated signaling pathway</a>   |
| GO:0006952 | 0.017  | 5.248     | 1        | 4     | 1782 | <a href="#">defense response</a>                                                        |
| GO:0009749 | 0.020  | 54.767    | 0        | 1     | 34   | <a href="#">response to glucose</a>                                                     |
| GO:0009817 | 0.020  | 54.767    | 0        | 1     | 34   | <a href="#">defense response to fungus, incompatible interaction</a>                    |
| GO:0044700 | 0.022  | 4.854     | 1        | 4     | 1911 | <a href="#">single organism signaling</a>                                               |
| GO:0006631 | 0.023  | 10.016    | 0        | 2     | 395  | <a href="#">fatty acid metabolic process</a>                                            |
| GO:0009411 | 0.025  | 45.424    | 0        | 1     | 45   | <a href="#">response to UV</a>                                                          |
| GO:0002237 | 0.028  | 39.261    | 0        | 1     | 47   | <a href="#">response to molecule of bacterial origin</a>                                |
| GO:0009863 | 0.029  | 38.528    | 0        | 1     | 53   | <a href="#">salicylic acid mediated signaling pathway</a>                               |
| GO:0051716 | 0.029  | 3.955     | 2        | 5     | 3156 | <a href="#">cellular response to stimulus</a>                                           |
| GO:0034284 | 0.029  | 37.621    | 0        | 1     | 49   | <a href="#">response to monosaccharide</a>                                              |
| GO:2000024 | 0.034  | 32.232    | 0        | 1     | 57   | <a href="#">regulation of leaf development</a>                                          |



|            |       |        |   |   |      |                                      |
|------------|-------|--------|---|---|------|--------------------------------------|
| GO:0008219 | 0.035 | 7.939  | 0 | 2 | 495  | <a href="#">cell death</a>           |
| GO:0007154 | 0.036 | 4.123  | 1 | 4 | 2208 | <a href="#">cell communication</a>   |
| GO:0048827 | 0.038 | 7.515  | 0 | 2 | 522  | <a href="#">phyllome development</a> |
| GO:0009744 | 0.039 | 28.191 | 0 | 1 | 65   | <a href="#">response to sucrose</a>  |
| GO:0010224 | 0.045 | 24.368 | 0 | 1 | 75   | <a href="#">response to UV-B</a>     |
| GO:0009835 | 0.048 | 22.532 | 0 | 1 | 81   | <a href="#">fruit ripening</a>       |

Gene to GO CC Conditional test for over-representation

| GOCCID     | Pvalue | OddsRatio | ExpCount | Count | Size | Term                                          |
|------------|--------|-----------|----------|-------|------|-----------------------------------------------|
| GO:0010282 | 0.006  | 198.587   | 0        | 1     | 9    | <a href="#">senescence-associated vacuole</a> |
| GO:0005777 | 0.011  | 14.063    | 0        | 2     | 244  | <a href="#">peroxisome</a>                    |
| GO:0005741 | 0.044  | 24.374    | 0        | 1     | 66   | <a href="#">mitochondrial outer membrane</a>  |

Gene to GO MF Conditional test for over-representation

| GOMFID     | Pvalue | OddsRatio | ExpCount | Count | Size | Term                                                         |
|------------|--------|-----------|----------|-------|------|--------------------------------------------------------------|
| GO:0047760 | 0.000  | 747.000   | 0        | 2     | 6    | <a href="#">butyrate-CoA ligase activity</a>                 |
| GO:0016877 | 0.001  | 63.434    | 0        | 2     | 49   | <a href="#">ligase activity, forming carbon-sulfur bonds</a> |
| GO:0005509 | 0.020  | 10.482    | 0        | 2     | 283  | <a href="#">calcium ion binding</a>                          |
| GO:0004197 | 0.036  | 30.093    | 0        | 1     | 47   | <a href="#">cysteine-type endopeptidase activity</a>         |

**Supplementary Table S6: GO enrichment analysis. *S. lycopersicum* leaf tissue during *B. cinerea* invasion at 24 hpi. Gene to GO BP Conditional test for over-representation**

| GOBPID     | Pvalue | OddsRatio | ExpCount | Count | Size | Term                                                                   |
|------------|--------|-----------|----------|-------|------|------------------------------------------------------------------------|
| GO:0015783 | 0.002  | 754.250   | 0        | 1     | 3    | <a href="#">GDP-fucose transport</a>                                   |
| GO:0015786 | 0.004  | 377.083   | 0        | 1     | 5    | <a href="#">UDP-glucose transport</a>                                  |
| GO:0072334 | 0.004  | 377.083   | 0        | 1     | 5    | <a href="#">UDP-galactose transmembrane transport</a>                  |
| GO:0009833 | 0.004  | 301.650   | 0        | 1     | 6    | <a href="#">plant-type primary cell wall biogenesis</a>                |
| GO:1901679 | 0.004  | 301.650   | 0        | 1     | 6    | <a href="#">nucleotide transmembrane transport</a>                     |
| GO:0015931 | 0.006  | 20.918    | 0        | 2     | 158  | <a href="#">nucleobase-containing compound transport</a>               |
| GO:0072531 | 0.006  | 215.440   | 0        | 1     | 8    | <a href="#">pyrimidine-containing compound transmembrane transport</a> |
| GO:0010274 | 0.011  | 100.494   | 0        | 1     | 16   | <a href="#">hydrotropism</a>                                           |
| GO:0015780 | 0.016  | 71.758    | 0        | 1     | 22   | <a href="#">nucleotide-sugar transport</a>                             |
| GO:0071669 | 0.016  | 12.009    | 0        | 2     | 272  | <a href="#">plant-type cell wall organization or biogenesis</a>        |
| GO:1901000 | 0.018  | 62.778    | 0        | 1     | 25   | <a href="#">regulation of response to salt stress</a>                  |
| GO:2000070 | 0.019  | 60.263    | 0        | 1     | 26   | <a href="#">regulation of response to water deprivation</a>            |
| GO:0033609 | 0.021  | 53.798    | 0        | 1     | 29   | <a href="#">oxalate metabolic process</a>                              |
| GO:0006383 | 0.021  | 53.798    | 0        | 1     | 29   | <a href="#">transcription from RNA polymerase III promoter</a>         |
| GO:0006284 | 0.028  | 38.600    | 0        | 1     | 40   | <a href="#">base-excision repair</a>                                   |
| GO:0009827 | 0.029  | 37.633    | 0        | 1     | 41   | <a href="#">plant-type cell wall modification</a>                      |
| GO:0015748 | 0.033  | 32.714    | 0        | 1     | 47   | <a href="#">organophosphate ester transport</a>                        |
| GO:0048653 | 0.034  | 32.016    | 0        | 1     | 48   | <a href="#">anther development</a>                                     |
| GO:0031408 | 0.041  | 26.385    | 0        | 1     | 58   | <a href="#">oxylipin biosynthetic process</a>                          |
| GO:0045489 | 0.042  | 25.928    | 0        | 1     | 59   | <a href="#">pectin biosynthetic process</a>                            |
| GO:0030244 | 0.048  | 22.434    | 0        | 1     | 68   | <a href="#">cellulose biosynthetic process</a>                         |

Gene to GO BP Conditional test for under-representation

| GOBPID     | Pvalue | OddsRatio | ExpCount | Count | Size | Term                                           |
|------------|--------|-----------|----------|-------|------|------------------------------------------------|
| GO:0050794 | 0.017  | 0.000     | 4        | 0     | 4892 | <a href="#">regulation of cellular process</a> |
| GO:0065007 | 0.037  | 0.165     | 4        | 1     | 6083 | <a href="#">biological regulation</a>          |

Gene to GO CC Conditional test for over-representation

| GOCCID     | Pvalue | OddsRatio | ExpCount | Count | Size | Term                                                                 |
|------------|--------|-----------|----------|-------|------|----------------------------------------------------------------------|
| GO:0032541 | 0.010  | 113.445   | 0        | 1     | 15   | <a href="#">cortical endoplasmic reticulum</a>                       |
| GO:0005793 | 0.012  | 93.412    | 0        | 1     | 18   | <a href="#">endoplasmic reticulum-Golgi intermediate compartment</a> |
| GO:0005666 | 0.016  | 69.023    | 0        | 1     | 24   | <a href="#">DNA-directed RNA polymerase III complex</a>              |
| GO:0098827 | 0.017  | 63.495    | 0        | 1     | 26   | <a href="#">endoplasmic reticulum subcompartment</a>                 |
| GO:0044425 | 0.028  | 3.228     | 5        | 9     | 7406 | <a href="#">membrane part</a>                                        |
| GO:0016021 | 0.048  | 2.800     | 5        | 8     | 6673 | <a href="#">integral component of membrane</a>                       |

Gene to GO MF Conditional test for over-representation

| GOMFID | Pvalue | OddsRatio | ExpCount | Count | Size | Term |
|--------|--------|-----------|----------|-------|------|------|
|--------|--------|-----------|----------|-------|------|------|

|            |       |         |   |   |      |                                                                                                                                               |
|------------|-------|---------|---|---|------|-----------------------------------------------------------------------------------------------------------------------------------------------|
| GO:0015605 | 0.000 | 78.805  | 0 | 2 | 43   | <a href="#">organophosphate ester transmembrane transporter activity</a>                                                                      |
| GO:0052821 | 0.002 | 747.115 | 0 | 1 | 3    | <a href="#">DNA-7-methyladenine glycosylase activity</a>                                                                                      |
| GO:0052822 | 0.002 | 747.115 | 0 | 1 | 3    | <a href="#">DNA-3-methylguanine glycosylase activity</a>                                                                                      |
| GO:0043916 | 0.002 | 747.115 | 0 | 1 | 3    | <a href="#">DNA-7-methylguanine glycosylase activity</a>                                                                                      |
| GO:0005457 | 0.002 | 747.115 | 0 | 1 | 3    | <a href="#">GDP-fucose transmembrane transporter activity</a>                                                                                 |
| GO:0005460 | 0.004 | 373.519 | 0 | 1 | 5    | <a href="#">UDP-glucose transmembrane transporter activity</a>                                                                                |
| GO:0005459 | 0.004 | 373.519 | 0 | 1 | 5    | <a href="#">UDP-galactose transmembrane transporter activity</a>                                                                              |
| GO:0016207 | 0.004 | 298.800 | 0 | 1 | 6    | <a href="#">4-coumarate-CoA ligase activity</a>                                                                                               |
| GO:0008725 | 0.008 | 149.362 | 0 | 1 | 11   | <a href="#">DNA-3-methyladenine glycosylase activity</a>                                                                                      |
| GO:0005347 | 0.010 | 114.876 | 0 | 1 | 14   | <a href="#">ATP transmembrane transporter activity</a>                                                                                        |
| GO:0015932 | 0.013 | 89.727  | 0 | 1 | 19   | <a href="#">nucleobase-containing compound transmembrane transporter activity</a>                                                             |
| GO:0015216 | 0.013 | 87.828  | 0 | 1 | 18   | <a href="#">purine nucleotide transmembrane transporter activity</a>                                                                          |
| GO:0005338 | 0.013 | 87.828  | 0 | 1 | 18   | <a href="#">nucleotide-sugar transmembrane transporter activity</a>                                                                           |
| GO:0008509 | 0.016 | 11.960  | 0 | 2 | 269  | <a href="#">anion transmembrane transporter activity</a>                                                                                      |
| GO:0019104 | 0.019 | 57.399  | 0 | 1 | 27   | <a href="#">DNA N-glycosylase activity</a>                                                                                                    |
| GO:0046564 | 0.019 | 57.399  | 0 | 1 | 27   | <a href="#">oxalate decarboxylase activity</a>                                                                                                |
| GO:0005337 | 0.021 | 53.294  | 0 | 1 | 29   | <a href="#">nucleoside transmembrane transporter activity</a>                                                                                 |
| GO:0016877 | 0.035 | 31.056  | 0 | 1 | 49   | <a href="#">ligase activity, forming carbon-sulfur bonds</a>                                                                                  |
| GO:0030145 | 0.039 | 27.597  | 0 | 1 | 55   | <a href="#">manganese ion binding</a>                                                                                                         |
| GO:0022892 | 0.041 | 4.570   | 1 | 3 | 1097 | <a href="#">substrate-specific transporter activity</a>                                                                                       |
| GO:0016702 | 0.042 | 25.252  | 0 | 1 | 60   | <a href="#">oxidoreductase activity, acting on single donors with incorporation of molecular oxygen, incorporation of two atoms of oxygen</a> |

**Supplementary Table S7:** GO enrichment analysis. *S. lycopersicum* leaf tissue during *B. cinerea* invasion at 24 hpi. Down regulated genes. Gene to GO BP Conditional test for over-representation

| GOBPID     | Pvalue | OddsRatio | ExpCount | Count | Size | Term                                                                    |
|------------|--------|-----------|----------|-------|------|-------------------------------------------------------------------------|
| GO:0009733 | 0.000  | 20.764    | 0        | 5     | 534  | <a href="#">response to auxin</a>                                       |
| GO:0009734 | 0.001  | 18.582    | 0        | 3     | 322  | <a href="#">auxin-activated signaling pathway</a>                       |
| GO:0006811 | 0.002  | 10.356    | 1        | 4     | 749  | <a href="#">ion transport</a>                                           |
| GO:0006865 | 0.002  | 39.960    | 0        | 2     | 84   | <a href="#">amino acid transport</a>                                    |
| GO:0010930 | 0.002  | 754.250   | 0        | 1     | 3    | <a href="#">negative regulation of auxin mediated signaling pathway</a> |
| GO:0080143 | 0.003  | 502.806   | 0        | 1     | 4    | <a href="#">regulation of amino acid export</a>                         |
| GO:0032890 | 0.005  | 251.361   | 0        | 1     | 7    | <a href="#">regulation of organic acid transport</a>                    |
| GO:0051952 | 0.005  | 251.361   | 0        | 1     | 7    | <a href="#">regulation of amine transport</a>                           |
| GO:0015711 | 0.006  | 20.137    | 0        | 2     | 164  | <a href="#">organic anion transport</a>                                 |
| GO:0032870 | 0.006  | 6.951     | 1        | 4     | 1092 | <a href="#">cellular response to hormone stimulus</a>                   |
| GO:0009719 | 0.006  | 5.665     | 1        | 5     | 1804 | <a href="#">response to endogenous stimulus</a>                         |
| GO:0001736 | 0.006  | 188.500   | 0        | 1     | 9    | <a href="#">establishment of planar polarity</a>                        |
| GO:0007165 | 0.008  | 5.397     | 1        | 5     | 1884 | <a href="#">signal transduction</a>                                     |
| GO:0023052 | 0.008  | 5.305     | 1        | 5     | 1913 | <a href="#">signaling</a>                                               |
| GO:0065007 | 0.009  | 4.456     | 4        | 9     | 6083 | <a href="#">biological regulation</a>                                   |
| GO:0048829 | 0.010  | 115.968   | 0        | 1     | 14   | <a href="#">root cap development</a>                                    |
| GO:0010492 | 0.011  | 100.494   | 0        | 1     | 16   | <a href="#">maintenance of shoot apical meristem identity</a>           |
| GO:0009635 | 0.013  | 88.662    | 0        | 1     | 18   | <a href="#">response to herbicide</a>                                   |
| GO:0010033 | 0.014  | 4.597     | 2        | 5     | 2172 | <a href="#">response to organic substance</a>                           |
| GO:0002009 | 0.016  | 68.492    | 0        | 1     | 23   | <a href="#">morphogenesis of an epithelium</a>                          |
| GO:0010167 | 0.016  | 68.492    | 0        | 1     | 23   | <a href="#">response to nitrate</a>                                     |
| GO:0009641 | 0.017  | 65.511    | 0        | 1     | 24   | <a href="#">shade avoidance</a>                                         |
| GO:0070887 | 0.018  | 4.989     | 1        | 4     | 1485 | <a href="#">cellular response to chemical stimulus</a>                  |
| GO:0009958 | 0.022  | 50.206    | 0        | 1     | 31   | <a href="#">positive gravitropism</a>                                   |
| GO:0044070 | 0.027  | 40.691    | 0        | 1     | 38   | <a href="#">regulation of anion transport</a>                           |
| GO:0010311 | 0.028  | 38.600    | 0        | 1     | 40   | <a href="#">lateral root formation</a>                                  |
| GO:0006857 | 0.029  | 37.633    | 0        | 1     | 41   | <a href="#">oligopeptide transport</a>                                  |
| GO:0015706 | 0.030  | 35.837    | 0        | 1     | 43   | <a href="#">nitrate transport</a>                                       |
| GO:0042128 | 0.035  | 30.706    | 0        | 1     | 50   | <a href="#">nitrate assimilation</a>                                    |
| GO:0022622 | 0.036  | 7.655     | 0        | 2     | 422  | <a href="#">root system development</a>                                 |
| GO:0019827 | 0.039  | 27.855    | 0        | 1     | 55   | <a href="#">stem cell population maintenance</a>                        |
| GO:0010286 | 0.039  | 27.347    | 0        | 1     | 56   | <a href="#">heat acclimation</a>                                        |
| GO:0042886 | 0.040  | 26.857    | 0        | 1     | 57   | <a href="#">amide transport</a>                                         |
| GO:0010218 | 0.042  | 25.928    | 0        | 1     | 59   | <a href="#">response to far red light</a>                               |
| GO:2001057 | 0.043  | 25.061    | 0        | 1     | 61   | <a href="#">reactive nitrogen species metabolic process</a>             |
| GO:0009629 | 0.043  | 25.061    | 0        | 1     | 61   | <a href="#">response to gravity</a>                                     |

|            |       |        |   |   |      |                                                           |
|------------|-------|--------|---|---|------|-----------------------------------------------------------|
| GO:0048513 | 0.044 | 4.489  | 1 | 3 | 1137 | <a href="#">organ development</a>                         |
| GO:0048519 | 0.048 | 4.342  | 1 | 3 | 1173 | <a href="#">negative regulation of biological process</a> |
| GO:0010101 | 0.048 | 22.434 | 0 | 1 | 68   | <a href="#">post-embryonic root morphogenesis</a>         |
| GO:0048765 | 0.049 | 21.781 | 0 | 1 | 70   | <a href="#">root hair cell differentiation</a>            |
| GO:1902578 | 0.049 | 3.517  | 1 | 4 | 2035 | <a href="#">single-organism localization</a>              |
| GO:0010054 | 0.050 | 21.469 | 0 | 1 | 71   | <a href="#">trichoblast differentiation</a>               |

Gene to GO CC Conditional test for over-representation

| GOCCID     | Pvalue | OddsRatio | ExpCount | Count | Size | Term                         |
|------------|--------|-----------|----------|-------|------|------------------------------|
| GO:0009986 | 0.022  | 50.559    | 0        | 1     | 35   | <a href="#">cell surface</a> |

Gene to GO MF Conditional test for over-representation

| GOMFID     | Pvalue | OddsRatio | ExpCount | Count | Size | Term                                                                                                      |
|------------|--------|-----------|----------|-------|------|-----------------------------------------------------------------------------------------------------------|
| GO:0008251 | 0.002  | 747.115   | 0        | 1     | 3    | <a href="#">tRNA-specific adenosine deaminase activity</a>                                                |
| GO:0015293 | 0.005  | 21.135    | 0        | 2     | 154  | <a href="#">symporter activity</a>                                                                        |
| GO:0010328 | 0.006  | 213.407   | 0        | 1     | 8    | <a href="#">auxin influx transmembrane transporter activity</a>                                           |
| GO:0010011 | 0.011  | 106.665   | 0        | 1     | 15   | <a href="#">auxin binding</a>                                                                             |
| GO:0019239 | 0.012  | 93.322    | 0        | 1     | 17   | <a href="#">deaminase activity</a>                                                                        |
| GO:0016814 | 0.016  | 67.850    | 0        | 1     | 23   | <a href="#">hydrolase activity, acting on carbon-nitrogen (but not peptide) bonds, in cyclic amidines</a> |
| GO:0015112 | 0.031  | 34.676    | 0        | 1     | 44   | <a href="#">nitrate transmembrane transporter activity</a>                                                |
| GO:0016799 | 0.042  | 25.688    | 0        | 1     | 59   | <a href="#">hydrolase activity, hydrolyzing N-glycosyl compounds</a>                                      |
| GO:0016597 | 0.043  | 24.829    | 0        | 1     | 61   | <a href="#">amino acid binding</a>                                                                        |
| GO:0018024 | 0.046  | 23.273    | 0        | 1     | 65   | <a href="#">histone-lysine N-methyltransferase activity</a>                                               |

Gene to GO MF Conditional test for under-representation

| GOMFID     | Pvalue | OddsRatio | ExpCount | Count | Size  | Term                                                       |
|------------|--------|-----------|----------|-------|-------|------------------------------------------------------------|
| GO:0003824 | 0.022  | 0.281     | 8        | 4     | 11423 | <a href="#">catalytic activity</a>                         |
| GO:0000166 | 0.023  | 0.000     | 3        | 0     | 4596  | <a href="#">nucleotide binding</a>                         |
| GO:0001882 | 0.045  | 0.000     | 3        | 0     | 3862  | <a href="#">nucleoside binding</a>                         |
| GO:0032555 | 0.045  | 0.000     | 3        | 0     | 3861  | <a href="#">purine ribonucleotide binding</a>              |
| GO:0032550 | 0.046  | 0.000     | 3        | 0     | 3839  | <a href="#">purine ribonucleoside binding</a>              |
| GO:0035639 | 0.047  | 0.000     | 3        | 0     | 3818  | <a href="#">purine ribonucleoside triphosphate binding</a> |
