# Supplementary material for: Pathogen recognition in compatible plant-microbe interactions
Source: PubMed Central journal article supplement (PMC5526865; doi:10.1038/s41598-017-04792-5), 2017-07-25
Supplement: 41598_2017_4792_MOESM2_ESM.pdf [file 41598_2017_4792_MOESM2_ESM.pdf]

# Supplementary Data 1

## Pathogen recognition in compatible plant-microbe interactions

---

Fabio Rezzonico<sup>1</sup>, Oliver Rupp<sup>2</sup>, Johannes Fahrenttrapp<sup>3\*</sup>

<sup>1</sup> Research group Environmental Genomics and Systems Biology, Zurich University of Applied Sciences, Wädenswil, Switzerland

<sup>2</sup> Bioinformatics and Systems Biology, University of Giessen, Giessen, Germany

<sup>3</sup> Research Group for Viticulture, Zurich University of Applied Sciences, Wädenswil, Switzerland

\* Corresponding author: johannes.fahrenttrapp@zhaw.ch

### **Abstract**

Microbial infections in plant leaves remain a major challenge in agriculture. Hence an understanding of disease mechanisms at the molecular level is of paramount importance for identifying possible intervention points for their control. Whole-transcriptome changes during early disease stages in susceptible plant species are less well-documented than those of resistant ones. This study focuses on the differential transcriptional changes at 24 hours post inoculation (hpi) in tomato leaflets affected by three pathogens: (1) *Phytophthora infestans*, (2) *Botrytis cinerea*, and (3) *Oidium neolycopersici*. Grey mould (*B. cinerea*) was the disease that had progressed the most by 24 hpi, both in terms of visible symptoms as well as differential gene expression. By means of RNA-seq, we identified 50 differentially expressed tomato genes induced by *B. cinerea* infection and 18 by *P. infestans* infection at 24 hpi. Additionally, a set of 63 genes were differentially expressed during all three diseases when compared by a Bayesian approach to their respective mock infections. And Gene expression patterns were found to also depend on the inoculation technique. These findings suggest a specific and distinct transcriptional response in plant leaf tissue in reaction to *B. cinerea* and *P. infestans* invasion at 24 hpi, indicating that plants may recognize the attacking pathogen.

### Color Key

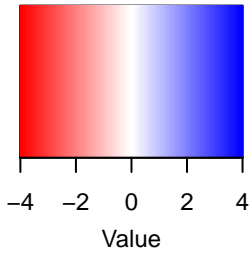

### Pattern32 2 genes

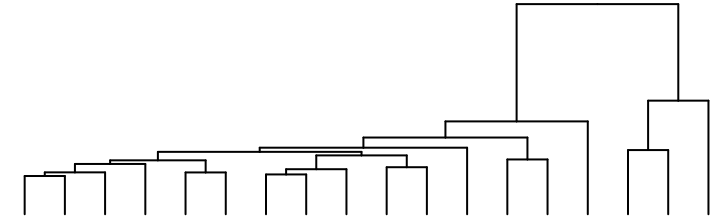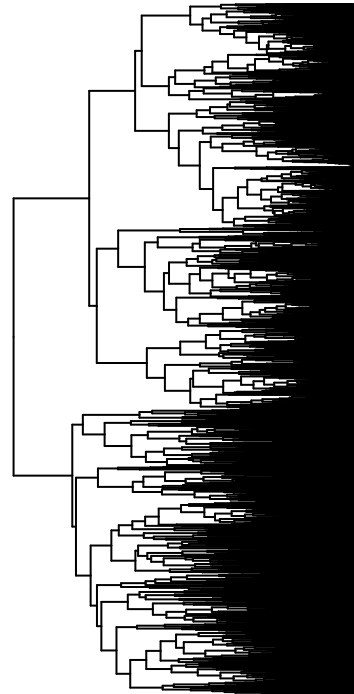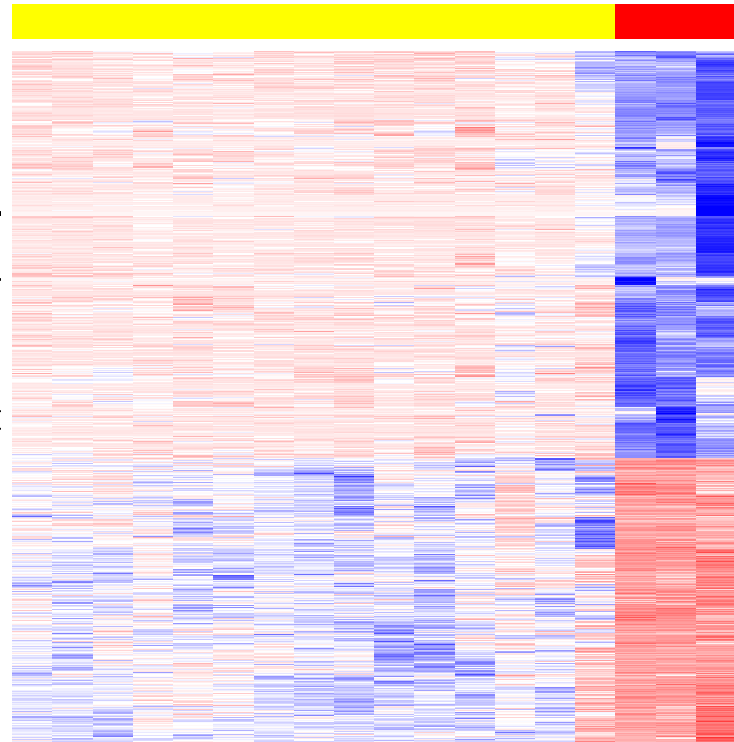

ON2  
BCm3  
BCm2  
Pi2  
ON3  
ONm3  
Pi3  
Pim2  
Pim3  
ON1  
ONm1  
ONm2  
Pi1  
Pim1  
BCm1  
BC2  
BC3  
BC1

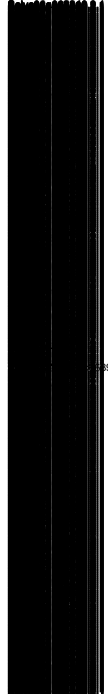

96\_1

### Color Key

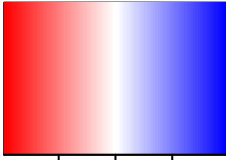

-2 0 2

Value

### Pattern119 2 genes

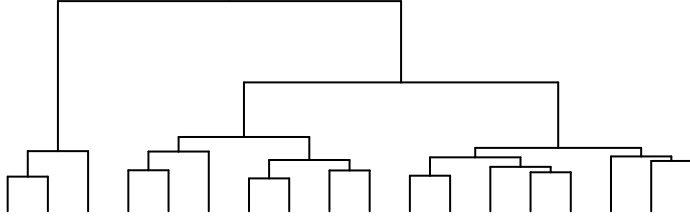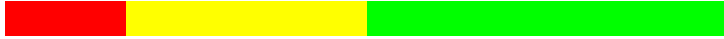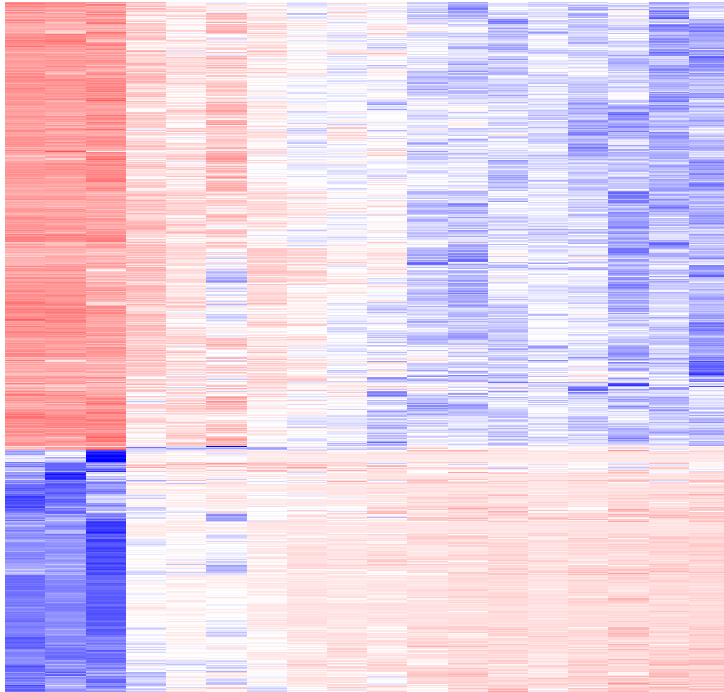

BC2 BC3 BC1 Pi1 Pi2 BCm1 BCm2 BCm3 Pi3 Pim1 ONm3 ON3 Pim2 ON2 ON1 ONm2 ONm1 Pim3

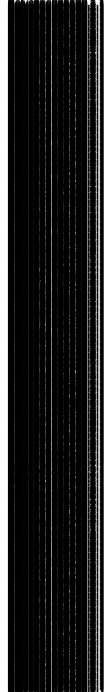

### Color Key

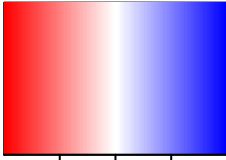

-2 0 2

Value

### Pattern85 2 genes

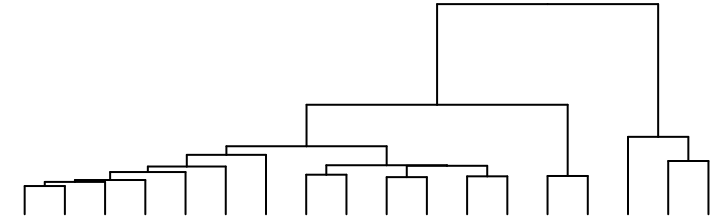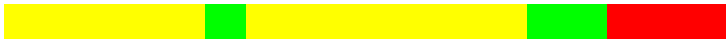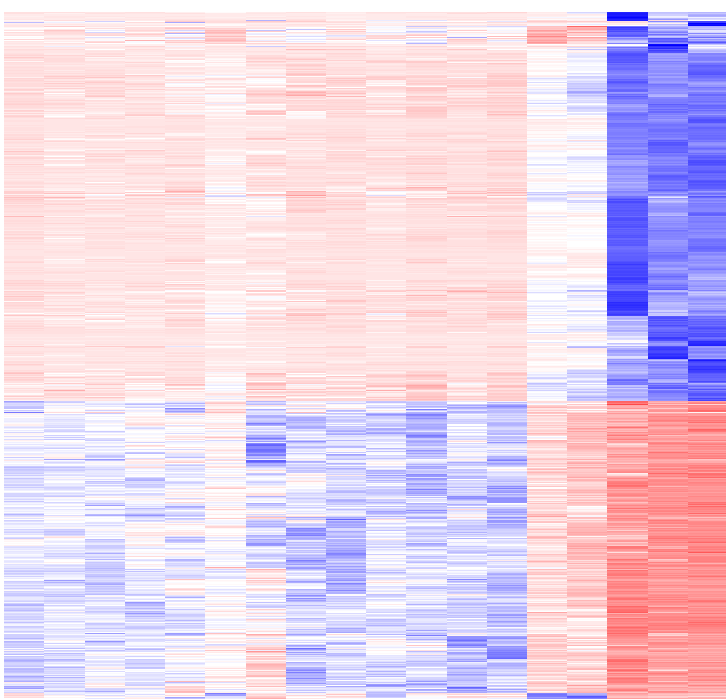

BCm3  
ON2  
Pim2  
BCm2  
Pim1  
Pi3  
BCm1  
ONm2  
Pim3  
ONm3  
ON3  
ON1  
ONm1  
Pi2  
Pi1  
BC1  
BC3  
BC2

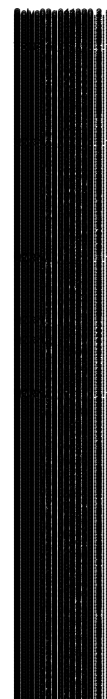

### Color Key

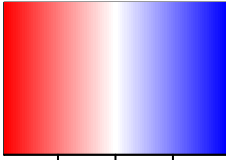

-2 0 2

Value

### Pattern83 2 genes

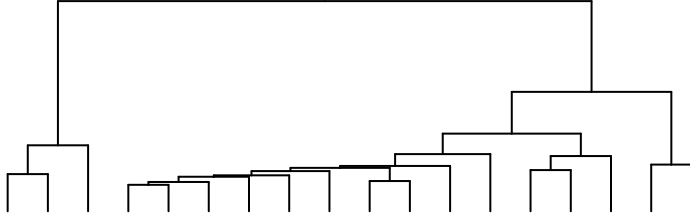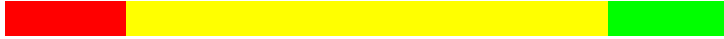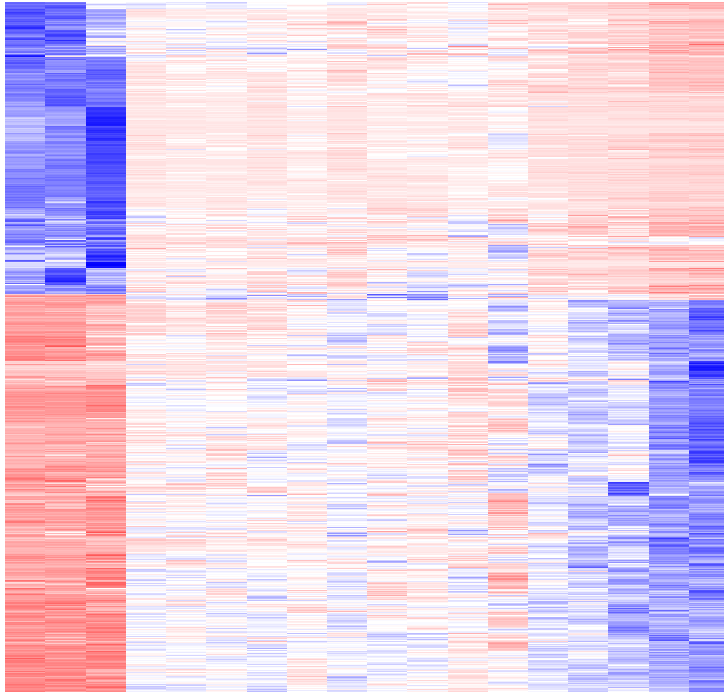

BC2 BC3 BC1 BCm3 ON2 BCm2 ON1 Pi2 ONm2 ON3 ONm3 Pi1 BCm1 ONm1 Pi3 Pim1 Pim2 Pim3

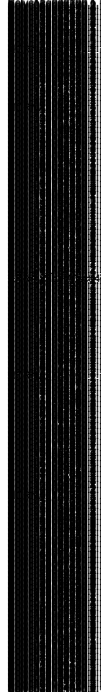

9970\_1

### Color Key

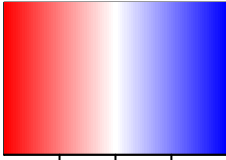

-2 0 2

Value

### Pattern86 2 genes

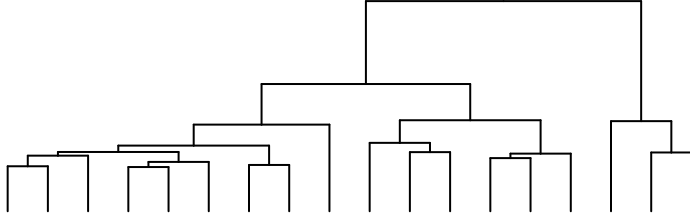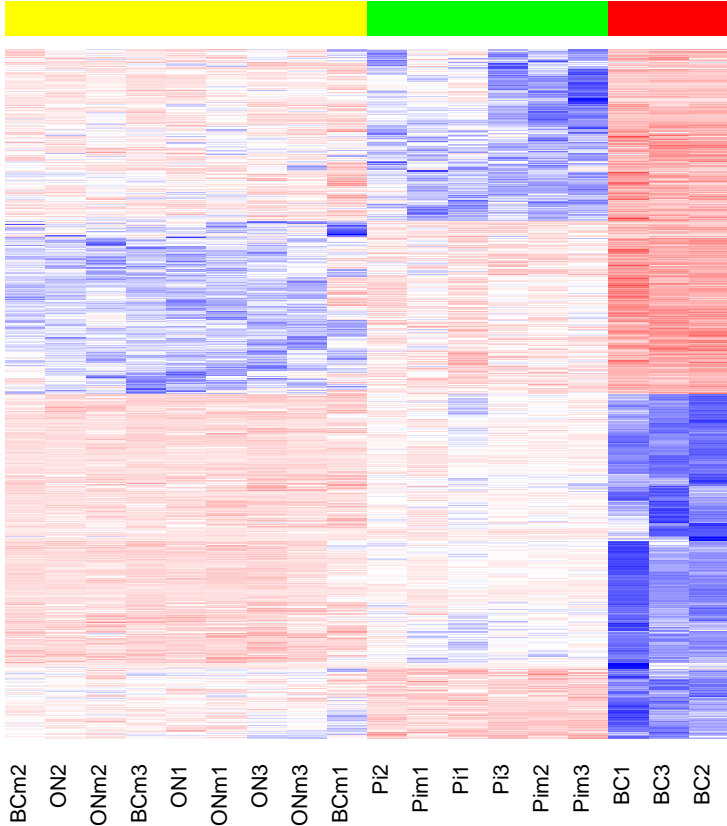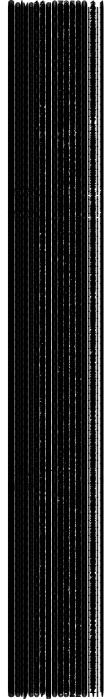

### Color Key

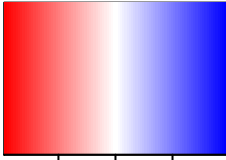

-2 0 2

Value

### Pattern29 2 genes

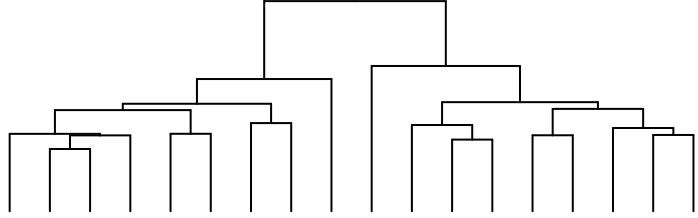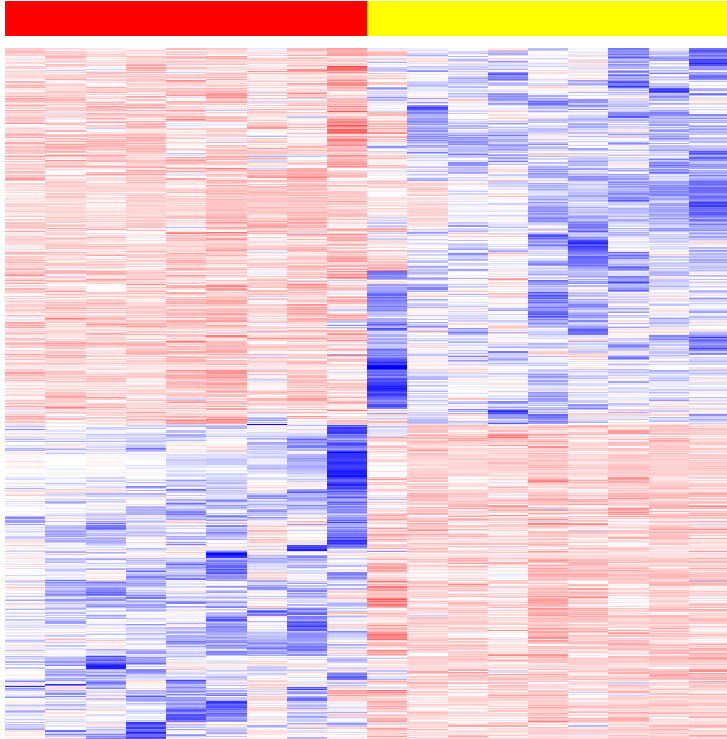

Pi2 Pi3 Pim3 Pim2 BC3 BC2 Pim1 Pi1 BC1 BCm1 BCm2 ON2 ONm2 ON3 ONm3 ONm1 BCm3 ON1

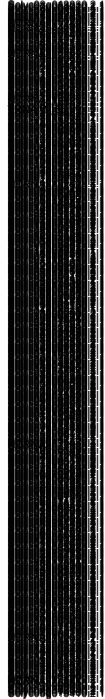

### Color Key

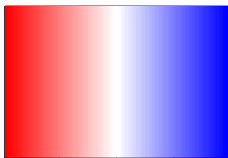

-2 0 2  
Value

### Pattern30 2 genes

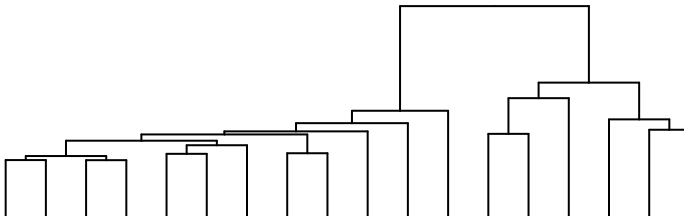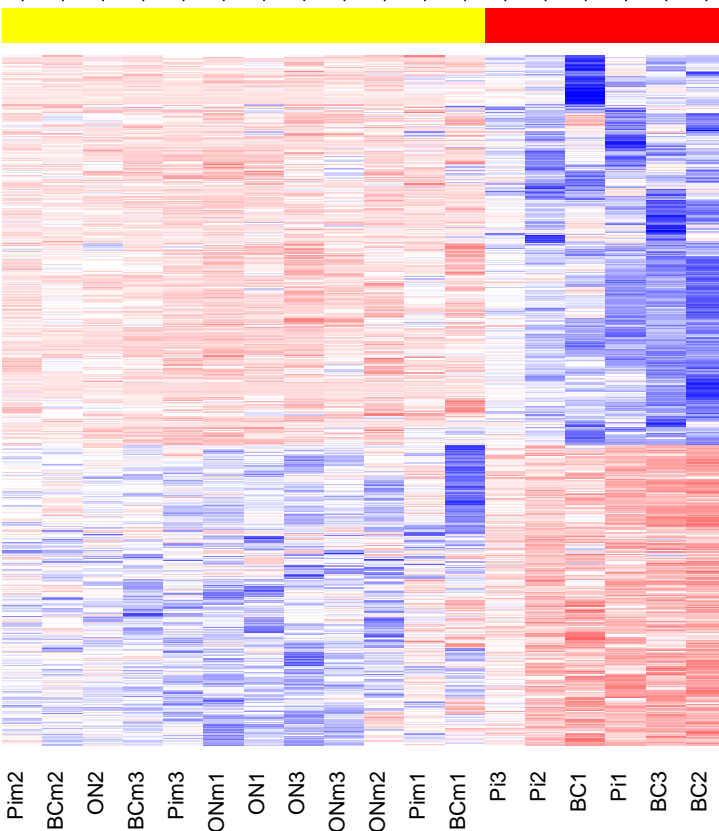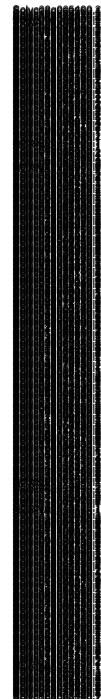



### Color Key

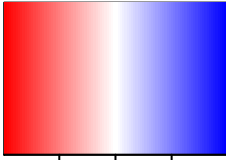

-2 0 2

Value

### Pattern16 2 genes

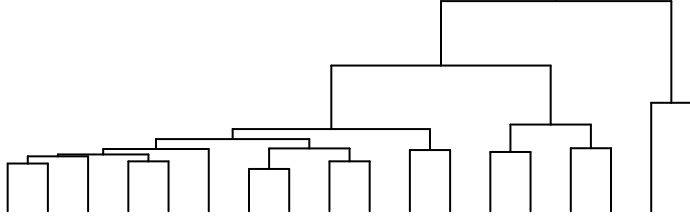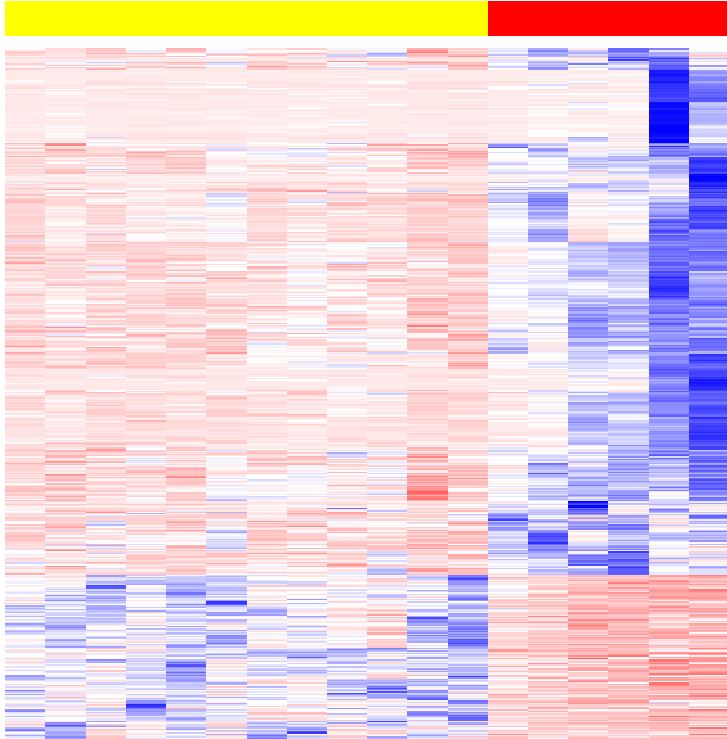

ON2 P12 ON1 P13 P1m2 ONm1 ONm3 ON3 P1m1 P11 ONm2 P1m3 BCm3 BCm2 BC3 BC2 BCm1 BC1

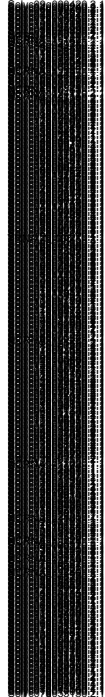

### Color Key

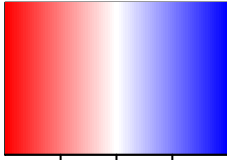

-2 0 2

Value

### Pattern92 2 genes

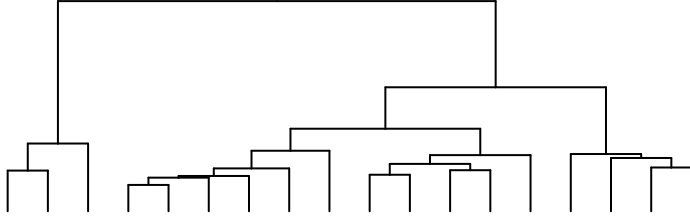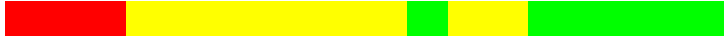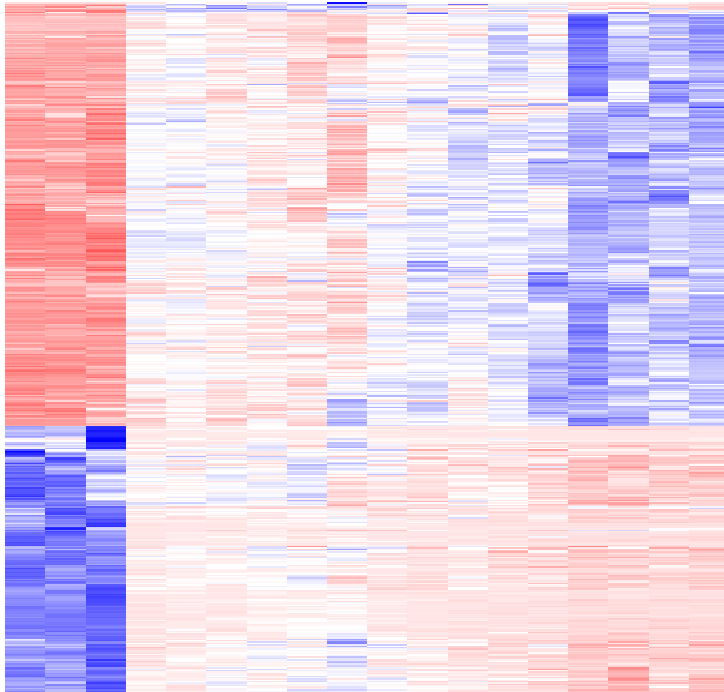

BC2 BC3 BC1 BCm3 ON2 BCm2 Pi2 Pi1 BCm1 ON3 ONm3 ON1 Pi3 Pim1 Pim3 ONm2 ONm1 Pim2

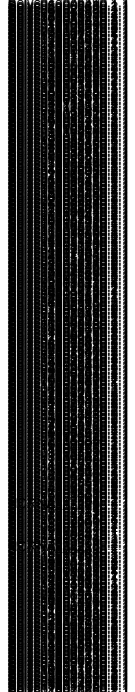

### Color Key

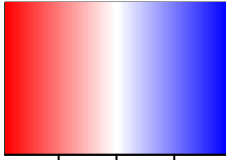

-2 0 2  
Value

### Pattern4 2 genes

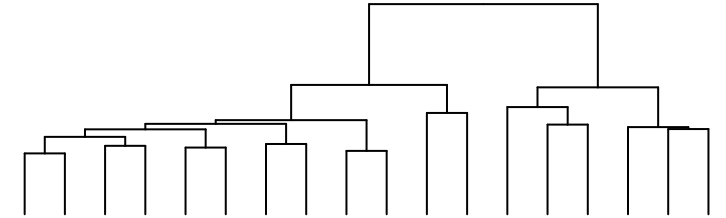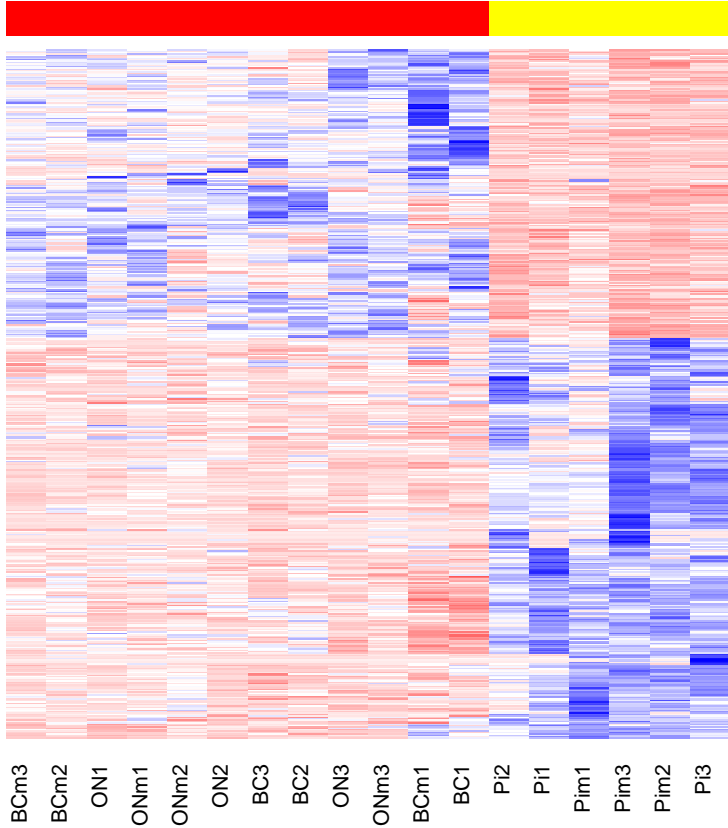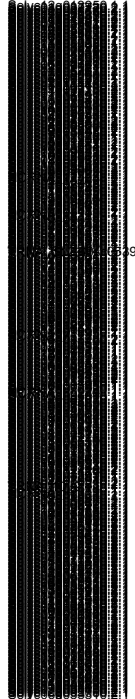

96\_1

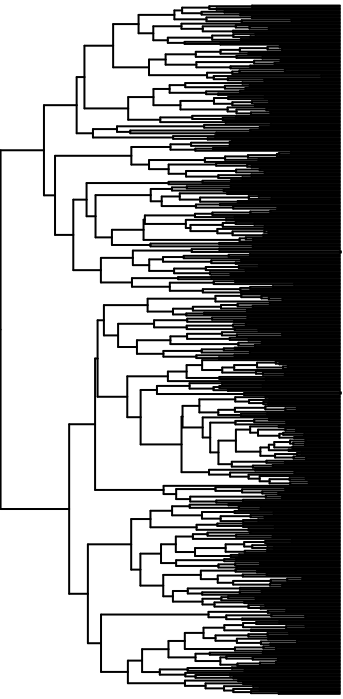

### Color Key

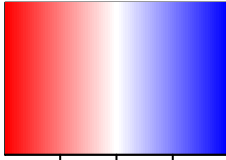

-2 0 2

Value

### Pattern118 2 genes

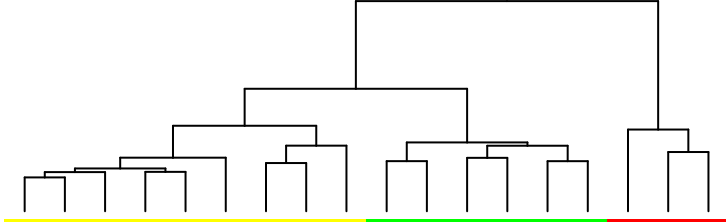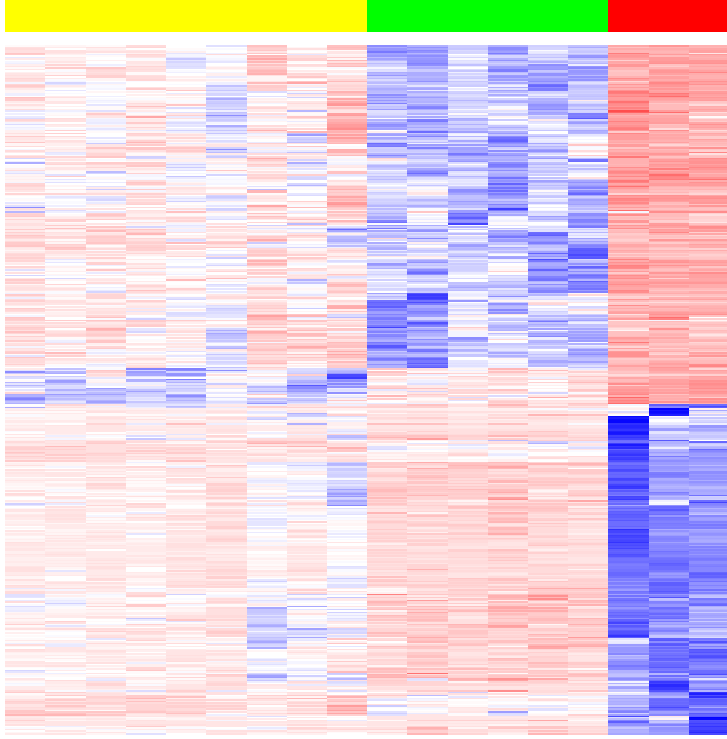

Pi3  
Pim2  
BCm2  
Pi2  
Pim3  
BCm3  
Pi1  
Pim1  
BCm1  
ON1  
ONm1  
ON2  
ONm2  
ON3  
ONm3  
BC1  
BC2  
BC3

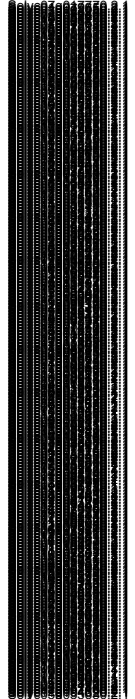

### Color Key

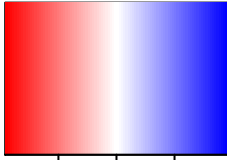

-2 0 2

Value

### Pattern13 2 genes

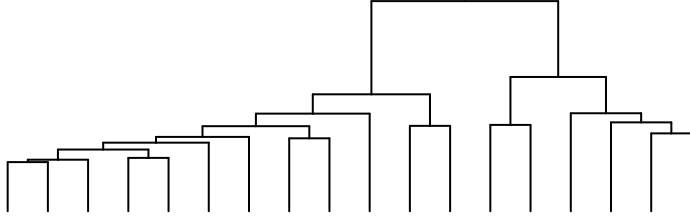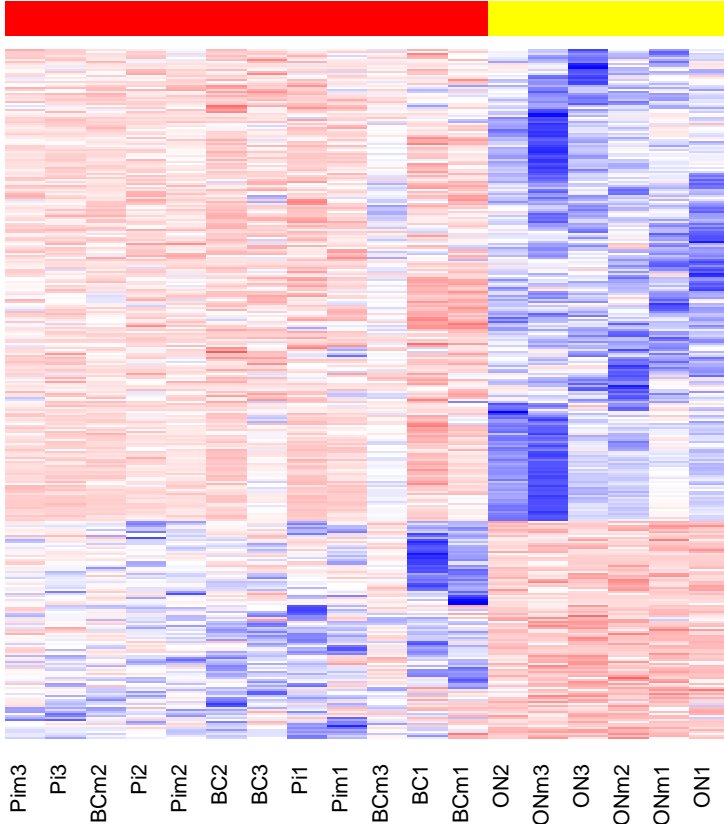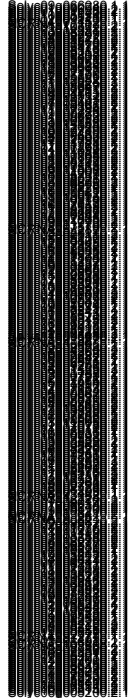

### Color Key

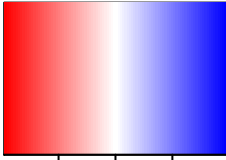

-2 0 2  
Value

### Pattern14 2 genes

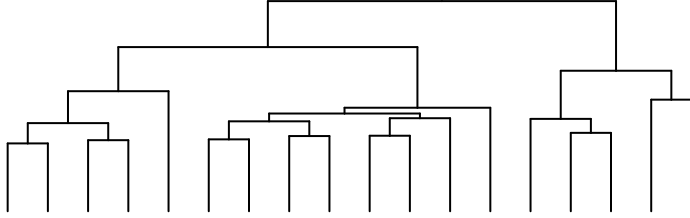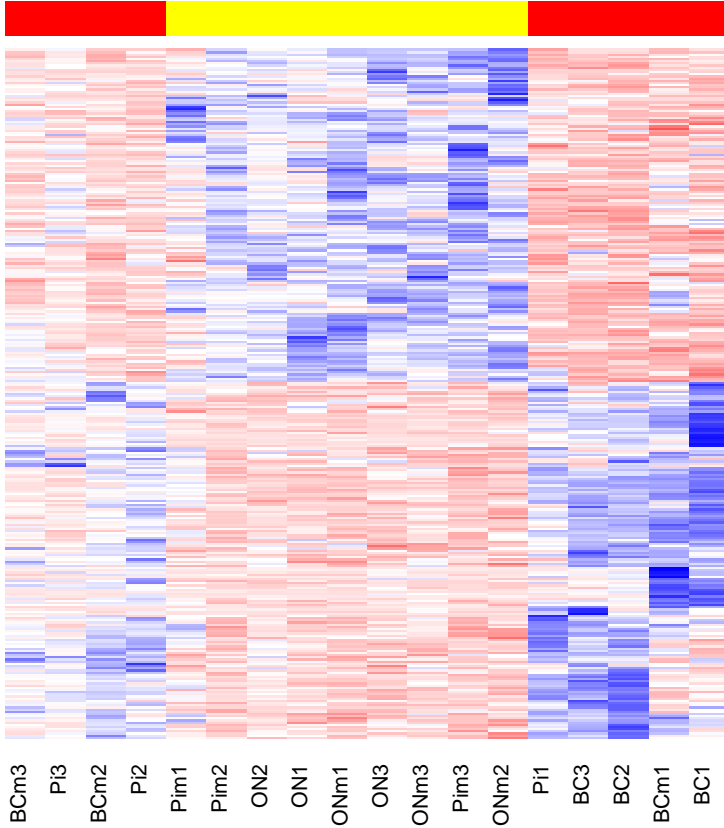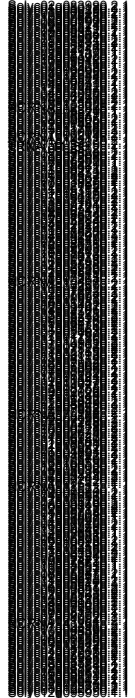

BCm3 Pi3 BCm2 Pi2 Pim1 Pim2 ON2 ON1 ONm1 ON3 ONm3 Pim3 ONm2 Pi1 BC3 BC2 BCm1 BC1

### Color Key

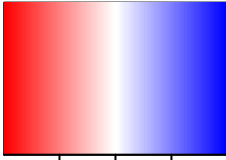

-2 0 2

Value

### Pattern122 2 genes

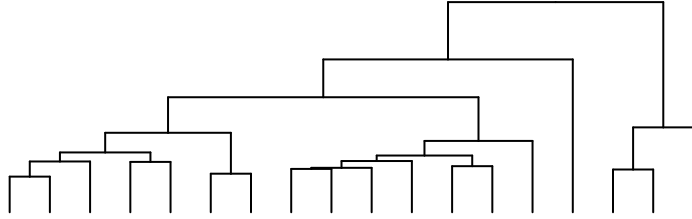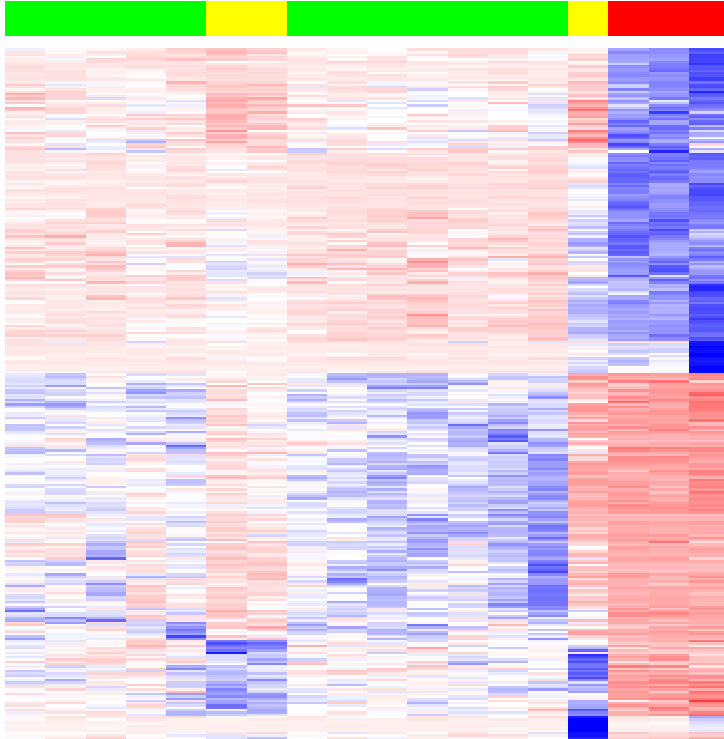

ON3  
ONm3  
Pi2  
Pi1  
Pim1  
BCm2  
BCm3  
ON2  
Pi3  
Pim2  
ONm2  
ON1  
ONm1  
Pim3  
BCm1  
BC3  
BC2  
BC1

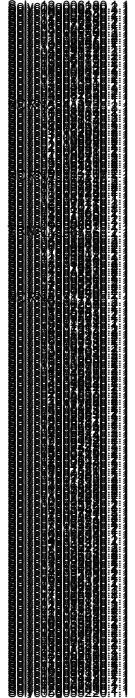

# Color Key

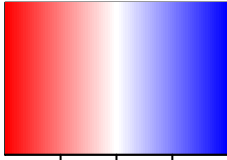

-2 0 2

Value

# Pattern95 2 genes

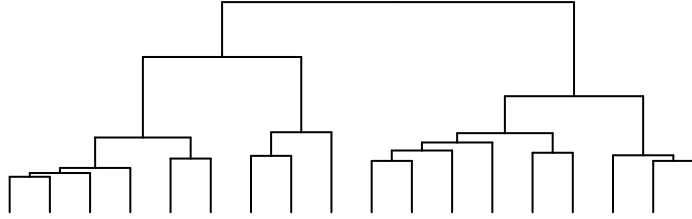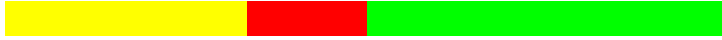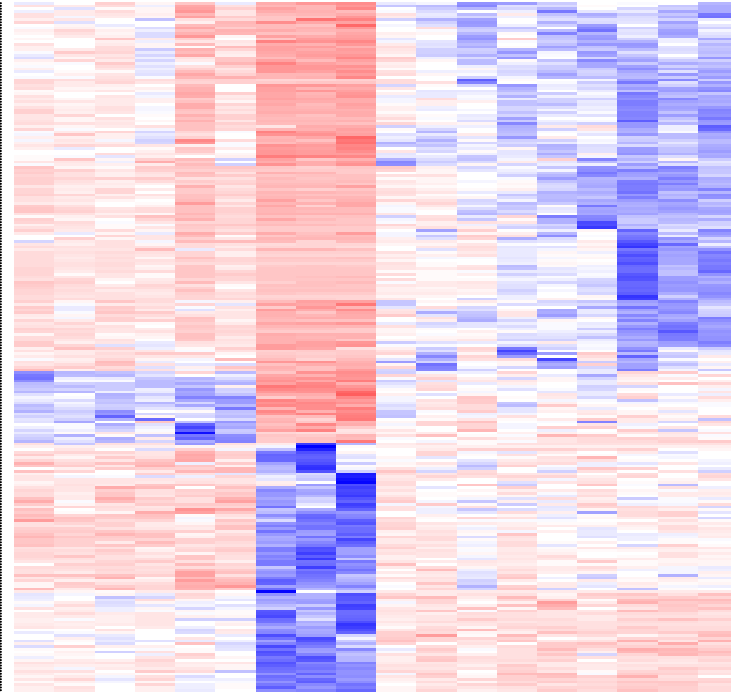

BCm3  
ON2  
BCm2  
ON1  
BCm1  
ON3  
BC3  
BC2  
BC1  
ONm3  
Pi2  
Pi1  
ONm1  
ONm2  
Pim1  
Pim3  
Pi3  
Pim2

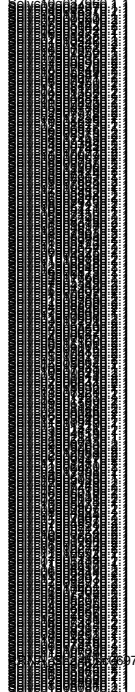

g01  
g02  
g03  
g04  
g05  
g06  
g07  
g08  
g09  
g10  
g11  
g12  
g13  
g14  
g15  
g16  
g17  
g18  
g19  
g20  
g21  
g22  
g23  
g24  
g25  
g26  
g27  
g28  
g29  
g30  
g31  
g32  
g33  
g34  
g35  
g36  
g37  
g38  
g39  
g40  
g41  
g42  
g43  
g44  
g45  
g46  
g47  
g48  
g49  
g50  
g51  
g52  
g53  
g54  
g55  
g56  
g57  
g58  
g59  
g60  
g61  
g62  
g63  
g64  
g65  
g66  
g67  
g68  
g69  
g70  
g71  
g72  
g73  
g74  
g75  
g76  
g77\_3







### Color Key

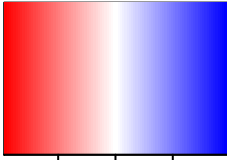

-2 0 2

Value

### Pattern20 2 genes

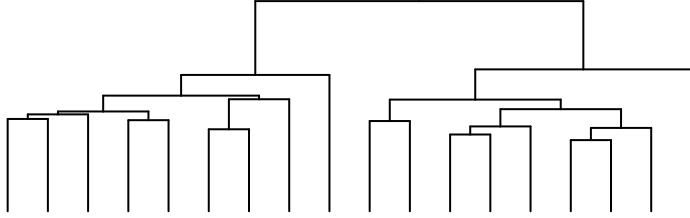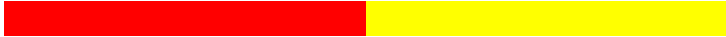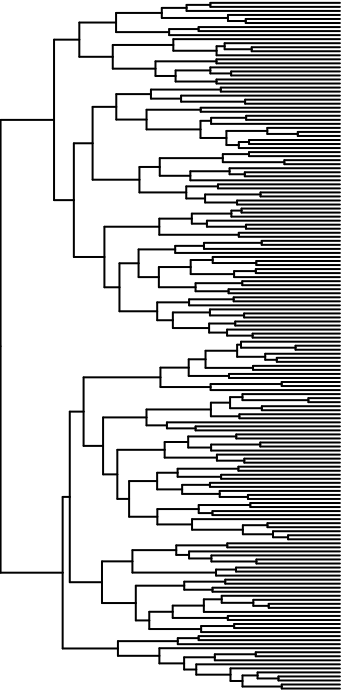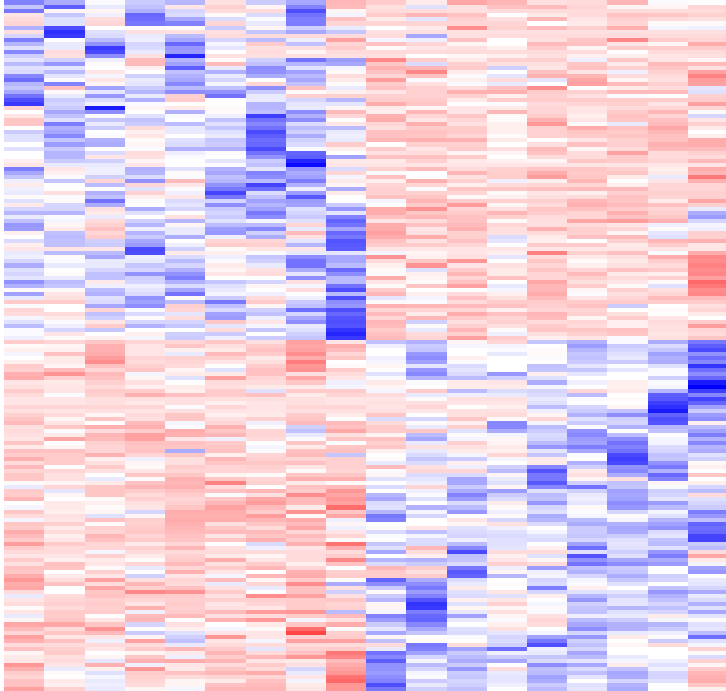

ONm2 ON2 BC2 ONm1 ON1 ON3 ONm3 BC3 BC1 Pi1 Pim1 BCm2 BCm3 Pi2 Pim2 Pi3 Pim3 BCm1

Gene1  
Gene2  
Gene3  
Gene4  
Gene5  
Gene6  
Gene7  
Gene8  
Gene9  
Gene10  
Gene11  
Gene12  
Gene13  
Gene14  
Gene15  
Gene16  
Gene17  
Gene18  
Gene19  
Gene20  
Gene21  
Gene22  
Gene23  
Gene24  
Gene25  
Gene26  
Gene27  
Gene28  
Gene29  
Gene30  
Gene31  
Gene32  
Gene33  
Gene34  
Gene35  
Gene36  
Gene37  
Gene38  
Gene39  
Gene40  
Gene41  
Gene42  
Gene43  
Gene44  
Gene45  
Gene46  
Gene47  
Gene48  
Gene49  
Gene50  
Gene51  
Gene52  
Gene53  
Gene54  
Gene55  
Gene56  
Gene57  
Gene58  
Gene59  
Gene60  
Gene61  
Gene62  
Gene63  
Gene64  
Gene65  
Gene66  
Gene67  
Gene68  
Gene69  
Gene70  
Gene71  
Gene72  
Gene73  
Gene74  
Gene75  
Gene76  
Gene77  
Gene78  
Gene79  
Gene80  
Gene81  
Gene82  
Gene83  
Gene84  
Gene85  
Gene86  
Gene87  
Gene88  
Gene89  
Gene90  
Gene91  
Gene92  
Gene93  
Gene94  
Gene95  
Gene96  
Gene97  
Gene98  
Gene99  
Gene100

### Color Key

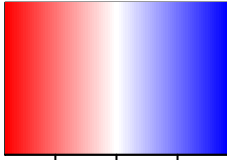

-2 0 2

Value

### Pattern6 2 genes

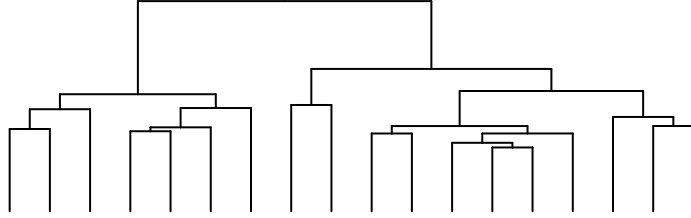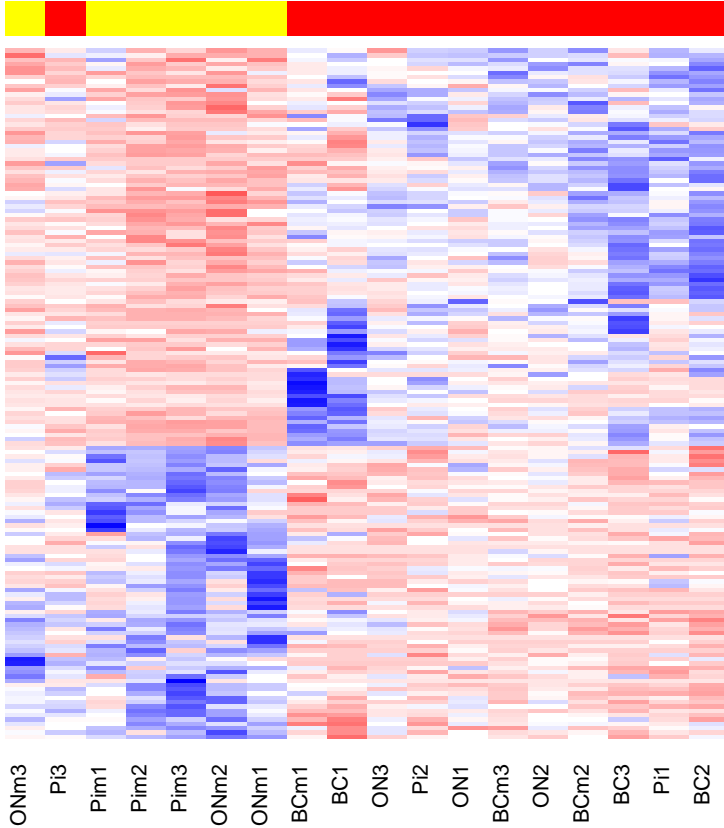

ONm3

Pi3

Pim1

Pim2

Pim3

ONm2

ONm1

BCm1

BC1

ON3

Pi2

ON1

BCm3

ON2

BCm2

BC3

Pi1

BC2

CG18001  
CG18002  
CG18003  
CG18004  
CG18005  
CG18006  
CG18007  
CG18008  
CG18009  
CG18010  
CG18011  
CG18012  
CG18013  
CG18014  
CG18015  
CG18016  
CG18017  
CG18018  
CG18019  
CG18020  
CG18021  
CG18022  
CG18023  
CG18024  
CG18025  
CG18026  
CG18027  
CG18028  
CG18029  
CG18030  
CG18031  
CG18032  
CG18033  
CG18034  
CG18035  
CG18036  
CG18037  
CG18038  
CG18039  
CG18040  
CG18041  
CG18042  
CG18043  
CG18044  
CG18045  
CG18046  
CG18047  
CG18048  
CG18049  
CG18050  
CG18051  
CG18052  
CG18053  
CG18054  
CG18055  
CG18056  
CG18057  
CG18058  
CG18059  
CG18060  
CG18061  
CG18062  
CG18063  
CG18064  
CG18065  
CG18066  
CG18067  
CG18068  
CG18069  
CG18070  
CG18071  
CG18072  
CG18073  
CG18074  
CG18075  
CG18076  
CG18077  
CG18078  
CG18079  
CG18080  
CG18081  
CG18082  
CG18083  
CG18084  
CG18085  
CG18086  
CG18087  
CG18088  
CG18089  
CG18090  
CG18091  
CG18092  
CG18093  
CG18094  
CG18095  
CG18096  
CG18097  
CG18098  
CG18099  
CG18100  
CG18101  
CG18102  
CG18103  
CG18104  
CG18105  
CG18106  
CG18107  
CG18108  
CG18109  
CG18110  
CG18111  
CG18112  
CG18113  
CG18114  
CG18115  
CG18116  
CG18117  
CG18118  
CG18119  
CG18120  
CG18121  
CG18122  
CG18123  
CG18124  
CG18125  
CG18126  
CG18127  
CG18128  
CG18129  
CG18130  
CG18131  
CG18132  
CG18133  
CG18134  
CG18135  
CG18136  
CG18137  
CG18138  
CG18139  
CG18140  
CG18141  
CG18142  
CG18143  
CG18144  
CG18145  
CG18146  
CG18147  
CG18148  
CG18149  
CG18150  
CG18151  
CG18152  
CG18153  
CG18154  
CG18155  
CG18156  
CG18157  
CG18158  
CG18159  
CG18160  
CG18161  
CG18162  
CG18163  
CG18164  
CG18165  
CG18166  
CG18167  
CG18168  
CG18169  
CG18170  
CG18171  
CG18172  
CG18173  
CG18174  
CG18175  
CG18176  
CG18177  
CG18178  
CG18179  
CG18180  
CG18181  
CG18182  
CG18183  
CG18184  
CG18185  
CG18186  
CG18187  
CG18188  
CG18189  
CG18190  
CG18191  
CG18192  
CG18193  
CG18194  
CG18195  
CG18196  
CG18197  
CG18198  
CG18199  
CG18200  
CG18201  
CG18202  
CG18203  
CG18204  
CG18205  
CG18206  
CG18207  
CG18208  
CG18209  
CG18210  
CG18211  
CG18212  
CG18213  
CG18214  
CG18215  
CG18216  
CG18217  
CG18218  
CG18219  
CG18220  
CG18221  
CG18222  
CG18223  
CG18224  
CG18225  
CG18226  
CG18227  
CG18228  
CG18229  
CG18230  
CG18231  
CG18232  
CG18233  
CG18234  
CG18235  
CG18236  
CG18237  
CG18238  
CG18239  
CG18240  
CG18241  
CG18242  
CG18243  
CG18244  
CG18245  
CG18246  
CG18247  
CG18248  
CG18249  
CG18250  
CG18251  
CG18252  
CG18253  
CG18254  
CG18255  
CG18256  
CG18257  
CG18258  
CG18259  
CG18260  
CG18261  
CG18262  
CG18263  
CG18264  
CG18265  
CG18266  
CG18267  
CG18268  
CG18269  
CG18270  
CG18271  
CG18272  
CG18273  
CG18274  
CG18275  
CG18276  
CG18277  
CG18278  
CG18279  
CG18280  
CG18281  
CG18282  
CG18283  
CG18284  
CG18285  
CG18286  
CG18287  
CG18288  
CG18289  
CG18290  
CG18291  
CG18292  
CG18293  
CG18294  
CG18295  
CG18296  
CG18297  
CG18298  
CG18299  
CG18300  
CG18301  
CG18302  
CG18303  
CG18304  
CG18305  
CG18306  
CG18307  
CG18308  
CG18309  
CG18310  
CG18311  
CG18312  
CG18313  
CG18314  
CG18315  
CG18316  
CG18317  
CG18318  
CG18319  
CG18320  
CG18321  
CG18322  
CG18323  
CG18324  
CG18325  
CG18326  
CG18327  
CG18328  
CG18329  
CG18330  
CG18331  
CG18332  
CG18333  
CG18334  
CG18335  
CG18336  
CG18337  
CG18338  
CG18339  
CG18340  
CG18341  
CG18342  
CG18343  
CG18344  
CG18345  
CG18346  
CG18347  
CG18348  
CG18349  
CG18350  
CG18351  
CG18352  
CG18353  
CG18354  
CG18355  
CG18356  
CG18357  
CG18358  
CG18359  
CG18360  
CG18361  
CG18362  
CG18363  
CG18364  
CG18365  
CG18366  
CG18367  
CG18368  
CG18369  
CG18370  
CG18371  
CG18372  
CG18373  
CG18374  
CG18375  
CG18376  
CG18377  
CG18378  
CG18379  
CG18380  
CG18381  
CG18382  
CG18383  
CG18384  
CG18385  
CG18386  
CG18387  
CG18388  
CG18389  
CG18390  
CG18391  
CG18392  
CG18393  
CG18394  
CG18395  
CG18396  
CG18397  
CG18398  
CG18399  
CG18400  
CG18401  
CG18402  
CG18403  
CG18404  
CG18405  
CG18406  
CG18407  
CG18408  
CG18409  
CG18410  
CG18411  
CG18412  
CG18413  
CG18414  
CG18415  
CG18416  
CG18417  
CG18418  
CG18419  
CG18420  
CG18421  
CG18422  
CG18423  
CG18424  
CG18425  
CG18426  
CG18427  
CG18428  
CG18429  
CG18430  
CG18431  
CG18432  
CG18433  
CG18434  
CG18435  
CG18436  
CG18437  
CG18438  
CG18439  
CG18440  
CG18441  
CG18442  
CG18443  
CG18444  
CG18445  
CG18446  
CG18447  
CG18448  
CG18449  
CG18450  
CG18451  
CG18452  
CG18453  
CG18454  
CG18455  
CG18456  
CG18457  
CG18458  
CG18459  
CG18460  
CG18461  
CG18462  
CG18463  
CG18464  
CG18465  
CG18466  
CG18467  
CG18468  
CG18469  
CG18470  
CG18471  
CG18472  
CG18473  
CG18474  
CG18475  
CG18476  
CG18477  
CG18478  
CG18479  
CG18480  
CG18481  
CG18482  
CG18483  
CG18484  
CG18485  
CG18486  
CG18487  
CG18488  
CG18489  
CG18490  
CG18491  
CG18492  
CG18493  
CG18494  
CG18495  
CG18496  
CG18497  
CG18498  
CG18499  
CG18500  
CG18501  
CG18502  
CG18503  
CG18504  
CG18505  
CG18506  
CG18507  
CG18508  
CG18509  
CG18510  
CG18511  
CG18512  
CG18513  
CG18514  
CG18515  
CG18516  
CG18517  
CG18518  
CG18519  
CG18520  
CG18521  
CG18522  
CG18523  
CG18524  
CG18525  
CG18526  
CG18527  
CG18528  
CG18529  
CG18530  
CG18531  
CG18532  
CG18533  
CG18534  
CG18535  
CG18536  
CG18537  
CG18538  
CG18539  
CG18540  
CG18541  
CG18542  
CG18543  
CG18544  
CG18545  
CG18546  
CG18547  
CG18548  
CG18549  
CG18550  
CG18551  
CG18552  
CG18553  
CG18554  
CG18555  
CG18556  
CG18557  
CG18558  
CG18559  
CG18560  
CG18561  
CG18562  
CG18563  
CG18564  
CG18565  
CG18566  
CG18567  
CG18568  
CG18569  
CG18570  
CG18571  
CG18572  
CG18573  
CG18574  
CG18575  
CG18576  
CG18577  
CG18578  
CG18579  
CG18580  
CG18581  
CG18582  
CG18583  
CG18584  
CG18585  
CG18586  
CG18587  
CG18588  
CG18589  
CG18590  
CG18591  
CG18592  
CG18593  
CG18594  
CG18595  
CG18596  
CG18597  
CG18598  
CG18599  
CG18600  
CG18601  
CG18602  
CG18603  
CG18604  
CG18605  
CG18606  
CG18607  
CG18608  
CG18609  
CG18610  
CG18611  
CG18612  
CG18613  
CG18614  
CG18615  
CG18616  
CG18617  
CG18618  
CG18619  
CG18620  
CG18621  
CG18622  
CG18623  
CG18624  
CG18625  
CG18626  
CG18627  
CG18628  
CG18629  
CG18630  
CG18631  
CG18632  
CG18633  
CG18634  
CG18635  
CG18636  
CG18637  
CG18638  
CG18639  
CG18640  
CG18641  
CG18642  
CG18643  
CG18644  
CG18645  
CG18646  
CG18647  
CG18648  
CG18649  
CG18650  
CG18651  
CG18652  
CG18653  
CG18654  
CG18655  
CG18656  
CG18657  
CG18658  
CG18659  
CG18660  
CG18661  
CG18662  
CG18663  
CG18664  
CG18665  
CG18666  
CG18667  
CG18668  
CG18669  
CG18670  
CG18671  
CG18672  
CG18673  
CG18674  
CG18675  
CG18676  
CG18677  
CG18678  
CG18679  
CG18680  
CG18681  
CG18682  
CG18683  
CG18684  
CG18685  
CG18686  
CG18687  
CG18688  
CG18689  
CG18690  
CG18691  
CG18692  
CG18693  
CG18694  
CG18695  
CG18696  
CG18697  
CG18698  
CG18699  
CG18700  
CG18701  
CG18702  
CG18703  
CG18704  
CG18705  
CG18706  
CG18707  
CG18708  
CG18709  
CG18710  
CG18711  
CG18712  
CG18713  
CG18714  
CG18715  
CG18716  
CG18717  
CG18718  
CG18719  
CG18720  
CG18721  
CG18722  
CG18723  
CG18724  
CG18725  
CG18726  
CG18727  
CG18728  
CG18729  
CG18730  
CG18731  
CG18732  
CG18733  
CG18734  
CG18735  
CG18736  
CG18737  
CG18738  
CG18739  
CG18740  
CG18741  
CG18742  
CG18743  
CG18744  
CG18745  
CG18746  
CG18747  
CG18748  
CG18749  
CG18750  
CG18751  
CG18752  
CG18753  
CG18754  
CG18755  
CG18756  
CG18757  
CG18758  
CG18759  
CG18760  
CG18761  
CG18762  
CG18763  
CG18764  
CG18765  
CG18766  
CG18767  
CG18768  
CG18769  
CG18770  
CG18771  
CG18772  
CG18773  
CG18774  
CG18775  
CG18776  
CG18777  
CG18778  
CG18779  
CG18780  
CG18781  
CG18782  
CG18783  
CG18784  
CG18785  
CG18786  
CG18787  
CG18788  
CG18789  
CG18790  
CG18791  
CG18792  
CG18793  
CG18794  
CG18795  
CG18796  
CG18797  
CG18798  
CG18799  
CG18800  
CG18801  
CG18802  
CG18803  
CG18804  
CG18805  
CG18806  
CG18807  
CG18808  
CG18809  
CG18810  
CG18811  
CG18812  
CG18813  
CG18814  
CG18815  
CG18816  
CG18817  
CG18818  
CG18819  
CG18820  
CG18821  
CG18822  
CG18823  
CG18824  
CG18825  
CG18826  
CG18827  
CG18828  
CG18829  
CG18830  
CG18831  
CG18832  
CG18833  
CG18834  
CG18835  
CG18836  
CG18837  
CG18838  
CG18839  
CG18840  
CG18841  
CG18842  
CG18843  
CG18844  
CG18845  
CG18846  
CG18847  
CG18848  
CG18849  
CG18850  
CG18851  
CG18852  
CG18853  
CG18854  
CG18855  
CG18856  
CG18857  
CG18858  
CG18859  
CG18860  
CG18861  
CG18862  
CG18863  
CG18864  
CG18865  
CG18866  
CG18867  
CG18868  
CG18869  
CG18870  
CG18871  
CG18872  
CG18873  
CG18874  
CG18875  
CG18876  
CG18877  
CG18878  
CG18879  
CG18880  
CG18881  
CG18882  
CG18883  
CG18884  
CG18885  
CG18886  
CG18887  
CG18888  
CG18889  
CG18890  
CG18891  
CG18892  
CG18893  
CG18894  
CG18895  
CG18896  
CG18897  
CG18898  
CG18899  
CG18900  
CG18901  
CG18902  
CG18903  
CG18904  
CG18905  
CG18906  
CG18907  
CG18908  
CG18909  
CG18910  
CG18911  
CG18912  
CG18913  
CG18914  
CG18915  
CG18916  
CG18917  
CG18918  
CG18919  
CG18920  
CG18921  
CG18922  
CG18923  
CG18924  
CG18925  
CG18926  
CG18927  
CG18928  
CG18929  
CG18930  
CG18931  
CG18932  
CG18933  
CG18934  
CG18935  
CG18936  
CG18937  
CG18938  
CG18939  
CG18940  
CG18941  
CG18942  
CG18943  
CG18944  
CG18945  
CG18946  
CG18947  
CG18948  
CG18949  
CG18950  
CG18951  
CG18952  
CG18953  
CG18954  
CG18955  
CG18956  
CG18957  
CG18958  
CG18959  
CG18960  
CG18961  
CG18962  
CG18963  
CG18964  
CG18965  
CG18966  
CG18967  
CG18968  
CG18969  
CG18970  
CG18971  
CG18972  
CG18973  
CG18974  
CG18975  
CG18976  
CG18977  
CG18978  
CG18979  
CG18980  
CG18981  
CG18982  
CG18983  
CG18984  
CG18985  
CG18986  
CG18987  
CG18988  
CG18989  
CG18990  
CG18991  
CG18992  
CG18993  
CG18994  
CG18995  
CG18996  
CG18997  
CG18998  
CG18999  
CG19000











### Color Key

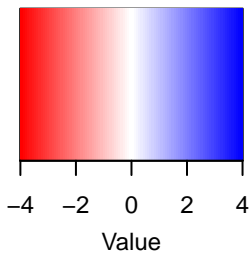

### Pattern17 2 genes

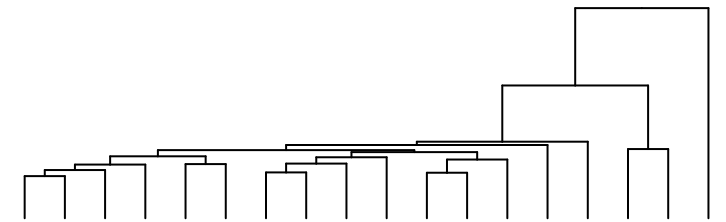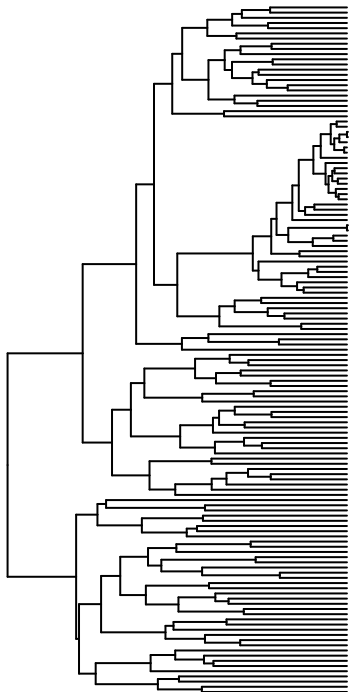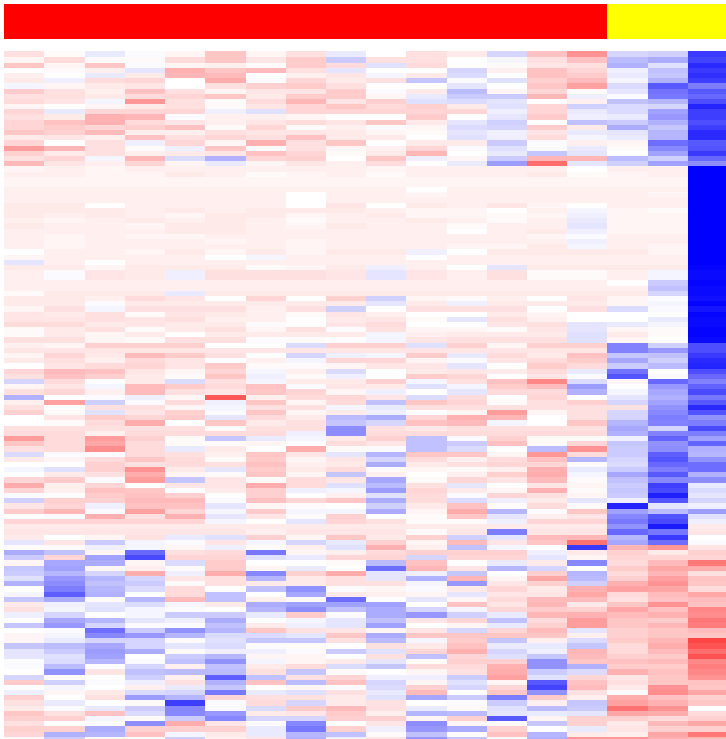

Pi3  
Pim2  
Pim3  
ONm2  
Pi1  
BC2  
ON2  
Pi2  
ON1  
ONm1  
ONm3  
ON3  
Pim1  
BC3  
BC1  
BCm3  
BCm2  
BCm1

CG16666  
CG16667  
CG16668  
CG16669  
CG16670  
CG16671  
CG16672  
CG16673  
CG16674  
CG16675  
CG16676  
CG16677  
CG16678  
CG16679  
CG16680  
CG16681  
CG16682  
CG16683  
CG16684  
CG16685  
CG16686  
CG16687  
CG16688  
CG16689  
CG16690  
CG16691  
CG16692  
CG16693  
CG16694  
CG16695  
CG16696  
CG16697  
CG16698  
CG16699  
CG16700  
CG16701  
CG16702  
CG16703  
CG16704  
CG16705  
CG16706  
CG16707  
CG16708  
CG16709  
CG16710  
CG16711  
CG16712  
CG16713  
CG16714  
CG16715  
CG16716  
CG16717  
CG16718  
CG16719  
CG16720  
CG16721  
CG16722  
CG16723  
CG16724  
CG16725  
CG16726  
CG16727  
CG16728  
CG16729  
CG16730  
CG16731  
CG16732  
CG16733  
CG16734  
CG16735  
CG16736  
CG16737  
CG16738  
CG16739  
CG16740  
CG16741  
CG16742  
CG16743  
CG16744  
CG16745  
CG16746  
CG16747  
CG16748  
CG16749  
CG16750  
CG16751  
CG16752  
CG16753  
CG16754  
CG16755  
CG16756  
CG16757  
CG16758  
CG16759  
CG16760  
CG16761  
CG16762  
CG16763  
CG16764  
CG16765  
CG16766  
CG16767  
CG16768  
CG16769  
CG16770  
CG16771  
CG16772  
CG16773  
CG16774  
CG16775  
CG16776  
CG16777  
CG16778  
CG16779  
CG16780  
CG16781  
CG16782  
CG16783  
CG16784  
CG16785  
CG16786  
CG16787  
CG16788  
CG16789  
CG16790  
CG16791  
CG16792  
CG16793  
CG16794  
CG16795  
CG16796  
CG16797  
CG16798  
CG16799  
CG16800  
CG16801  
CG16802  
CG16803  
CG16804  
CG16805  
CG16806  
CG16807  
CG16808  
CG16809  
CG16810  
CG16811  
CG16812  
CG16813  
CG16814  
CG16815  
CG16816  
CG16817  
CG16818  
CG16819  
CG16820  
CG16821  
CG16822  
CG16823  
CG16824  
CG16825  
CG16826  
CG16827  
CG16828  
CG16829  
CG16830  
CG16831  
CG16832  
CG16833  
CG16834  
CG16835  
CG16836  
CG16837  
CG16838  
CG16839  
CG16840  
CG16841  
CG16842  
CG16843  
CG16844  
CG16845  
CG16846  
CG16847  
CG16848  
CG16849  
CG16850  
CG16851  
CG16852  
CG16853  
CG16854  
CG16855  
CG16856  
CG16857  
CG16858  
CG16859  
CG16860  
CG16861  
CG16862  
CG16863  
CG16864  
CG16865  
CG16866  
CG16867  
CG16868  
CG16869  
CG16870  
CG16871  
CG16872  
CG16873  
CG16874  
CG16875  
CG16876  
CG16877  
CG16878  
CG16879  
CG16880  
CG16881  
CG16882  
CG16883  
CG16884  
CG16885  
CG16886  
CG16887  
CG16888  
CG16889  
CG16890  
CG16891  
CG16892  
CG16893  
CG16894  
CG16895  
CG16896  
CG16897  
CG16898  
CG16899  
CG16900  
CG16901  
CG16902  
CG16903  
CG16904  
CG16905  
CG16906  
CG16907  
CG16908  
CG16909  
CG16910  
CG16911  
CG16912  
CG16913  
CG16914  
CG16915  
CG16916  
CG16917  
CG16918  
CG16919  
CG16920  
CG16921  
CG16922  
CG16923  
CG16924  
CG16925  
CG16926  
CG16927  
CG16928  
CG16929  
CG16930  
CG16931  
CG16932  
CG16933  
CG16934  
CG16935  
CG16936  
CG16937  
CG16938  
CG16939  
CG16940  
CG16941  
CG16942  
CG16943  
CG16944  
CG16945  
CG16946  
CG16947  
CG16948  
CG16949  
CG16950  
CG16951  
CG16952  
CG16953  
CG16954  
CG16955  
CG16956  
CG16957  
CG16958  
CG16959  
CG16960  
CG16961  
CG16962  
CG16963  
CG16964  
CG16965  
CG16966  
CG16967  
CG16968  
CG16969  
CG16970  
CG16971  
CG16972  
CG16973  
CG16974  
CG16975  
CG16976  
CG16977  
CG16978  
CG16979  
CG16980  
CG16981  
CG16982  
CG16983  
CG16984  
CG16985  
CG16986  
CG16987  
CG16988  
CG16989  
CG16990  
CG16991  
CG16992  
CG16993  
CG16994  
CG16995  
CG16996  
CG16997  
CG16998  
CG16999  
CG17000











### Color Key

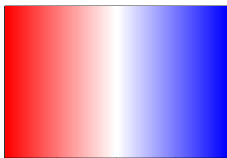

-2 0 2  
Value

### Pattern121 2 genes

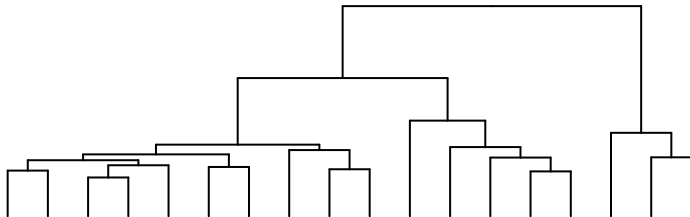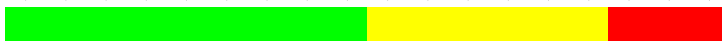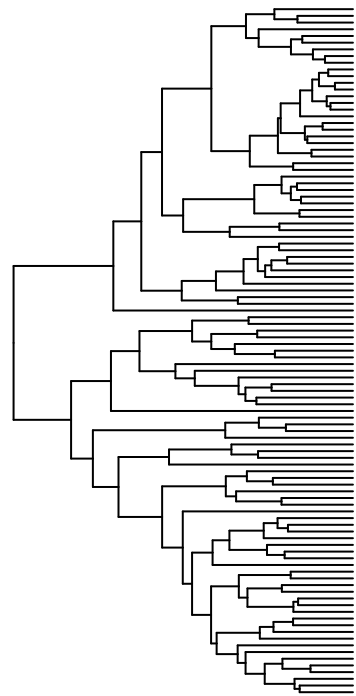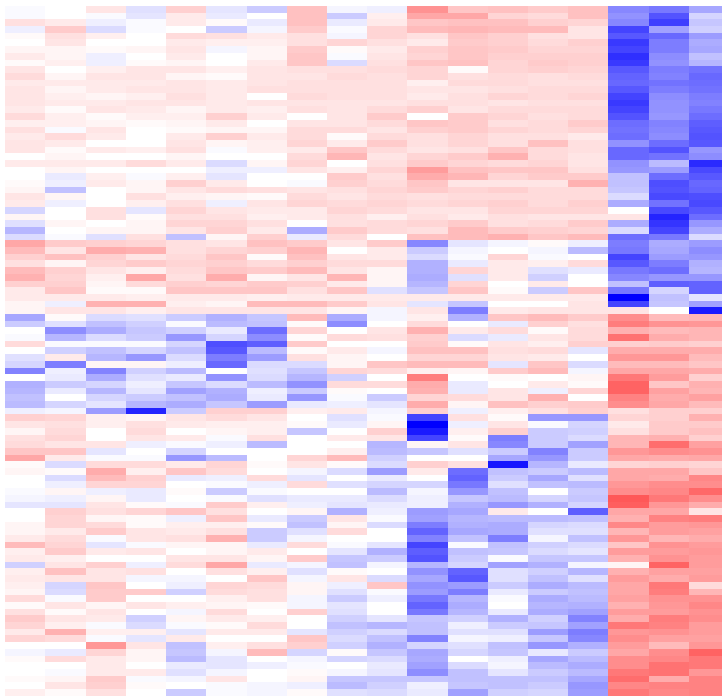

ONm3  
Pi1  
Pi2  
ON2  
ONm1  
ON1  
ONm2  
ON3  
Pi3  
BCm3  
BCm1  
Pim1  
BCm2  
Pim2  
Pim3  
BC1  
BC3  
BC2

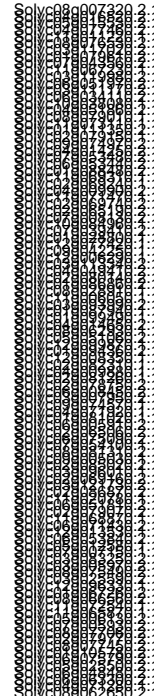





### Color Key

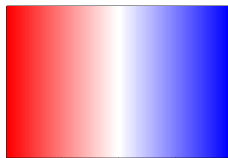

-2 0 2  
Value

### Pattern166 2 genes

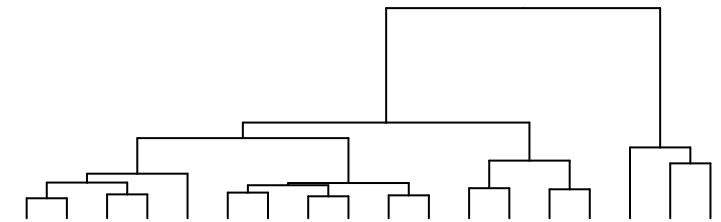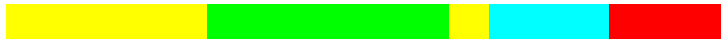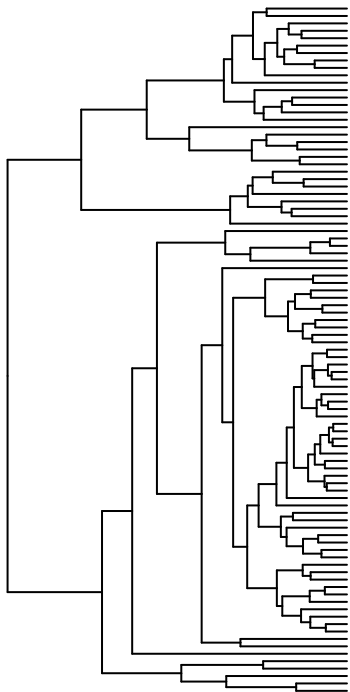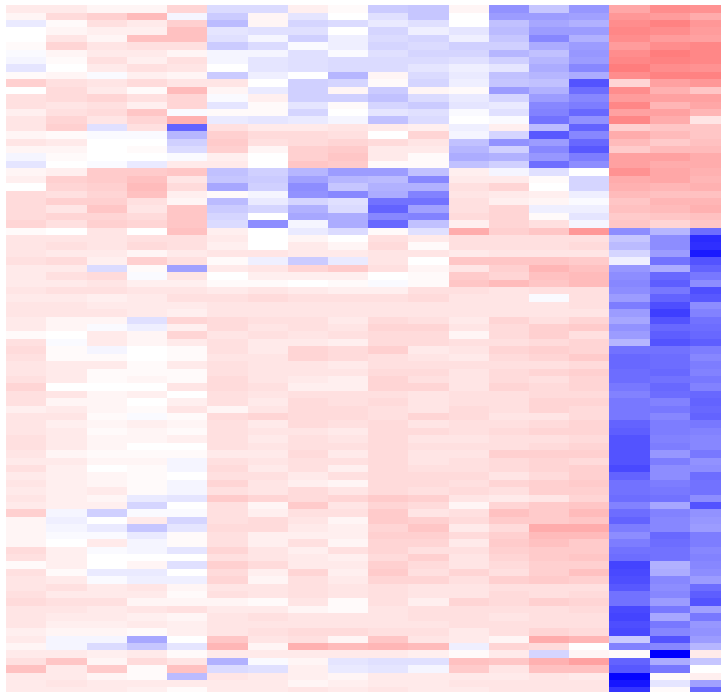

BCm3  
BCm2  
Pi2  
Pi1  
BCm1  
ON1  
ON2  
ON3  
ONm3  
ONm1  
ONm2  
Pi3  
Pim1  
Pim2  
Pim3  
BC1  
BC2  
BC3

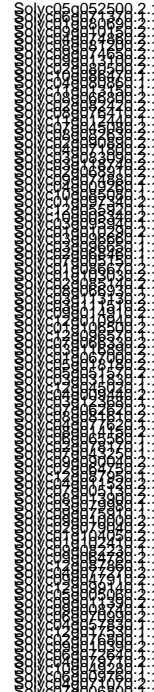

### Color Key

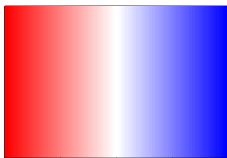

-2 0 2  
Value

### Pattern112 2 genes

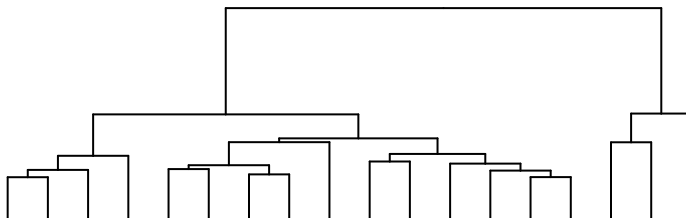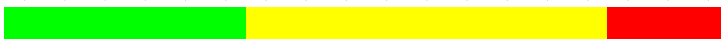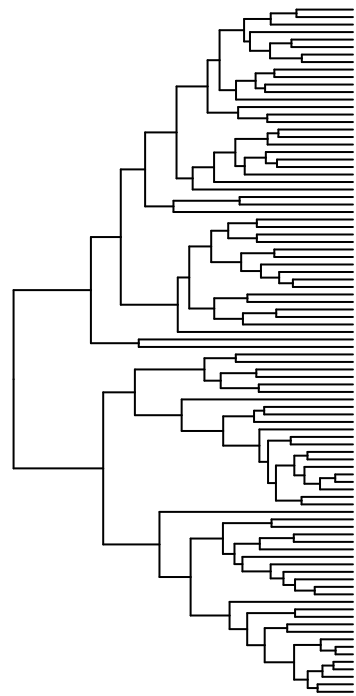

ON2  
Pi2  
ON3  
Pi1  
ON1  
Pi3  
ONm3  
BCm3  
BCm1  
ONm2  
Pim1  
BCm2  
ONm1  
Pim2  
Pim3  
BC2  
BC3  
BC1

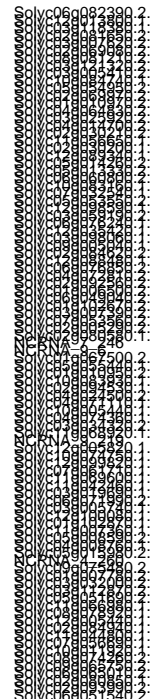

### Color Key

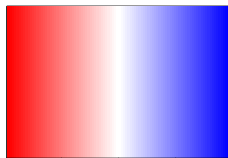

-2 0 2  
Value

### Pattern19 2 genes

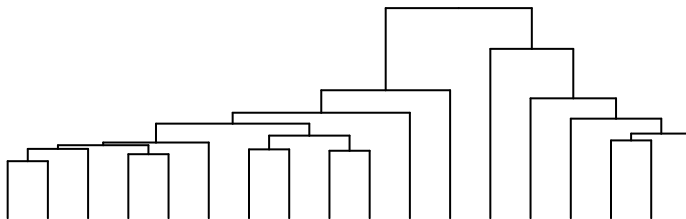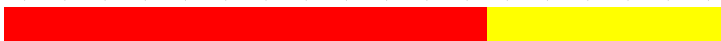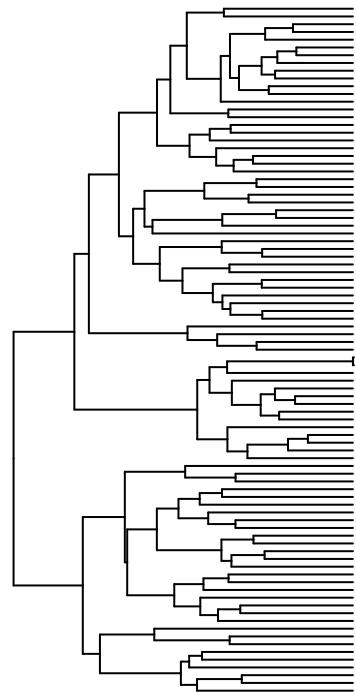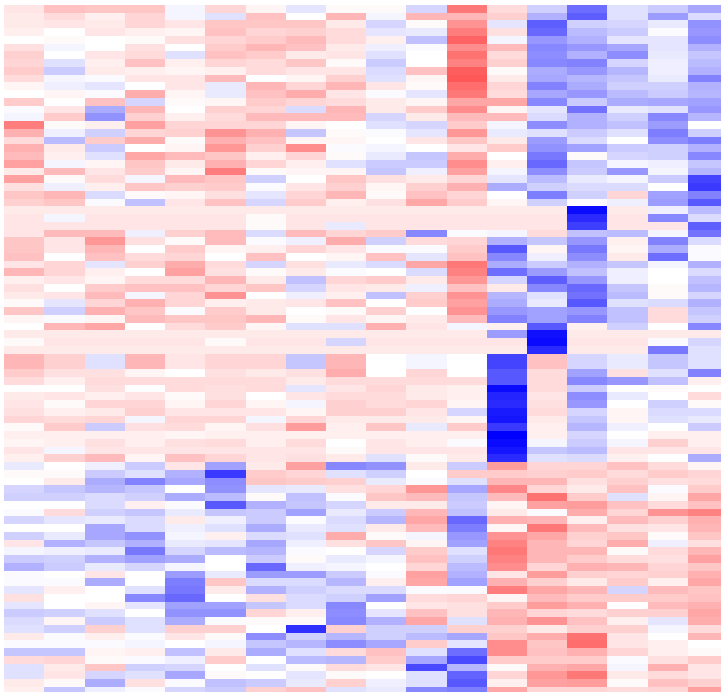

Pim2  
ON2  
ON1  
ONm1  
Pim3  
ONm2  
ON3  
ONm3  
BC3  
BC2  
Pim1  
BC1  
BCm1  
Pi1  
Pi2  
Pi3  
BCm3  
BCm2

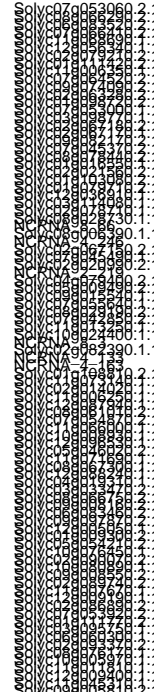

ONm1  
ONm2  
ONm3  
ONm4  
ONm5  
ONm6  
ONm7  
ONm8  
ONm9  
ONm10  
ONm11  
ONm12  
ONm13  
ONm14  
ONm15  
ONm16  
ONm17  
ONm18  
ONm19  
ONm20  
ONm21  
ONm22  
ONm23  
ONm24  
ONm25  
ONm26  
ONm27  
ONm28  
ONm29  
ONm30  
ONm31  
ONm32  
ONm33  
ONm34  
ONm35  
ONm36  
ONm37  
ONm38  
ONm39  
ONm40  
ONm41  
ONm42  
ONm43  
ONm44  
ONm45  
ONm46  
ONm47  
ONm48  
ONm49  
ONm50  
ONm51  
ONm52  
ONm53  
ONm54  
ONm55  
ONm56  
ONm57  
ONm58  
ONm59  
ONm60  
ONm61  
ONm62  
ONm63  
ONm64  
ONm65  
ONm66  
ONm67  
ONm68  
ONm69  
ONm70  
ONm71  
ONm72  
ONm73  
ONm74  
ONm75  
ONm76  
ONm77  
ONm78  
ONm79  
ONm80  
ONm81  
ONm82  
ONm83  
ONm84  
ONm85  
ONm86  
ONm87  
ONm88  
ONm89  
ONm90  
ONm91  
ONm92  
ONm93  
ONm94  
ONm95  
ONm96  
ONm97  
ONm98  
ONm99  
ONm100  
ONm101  
ONm102  
ONm103  
ONm104  
ONm105  
ONm106  
ONm107  
ONm108  
ONm109  
ONm110  
ONm111  
ONm112  
ONm113  
ONm114  
ONm115  
ONm116  
ONm117  
ONm118  
ONm119  
ONm120  
ONm121  
ONm122  
ONm123  
ONm124  
ONm125  
ONm126  
ONm127  
ONm128  
ONm129  
ONm130  
ONm131  
ONm132  
ONm133  
ONm134  
ONm135  
ONm136  
ONm137  
ONm138  
ONm139  
ONm140  
ONm141  
ONm142  
ONm143  
ONm144  
ONm145  
ONm146  
ONm147  
ONm148  
ONm149  
ONm150  
ONm151  
ONm152  
ONm153  
ONm154  
ONm155  
ONm156  
ONm157  
ONm158  
ONm159  
ONm160  
ONm161  
ONm162  
ONm163  
ONm164  
ONm165  
ONm166  
ONm167  
ONm168  
ONm169  
ONm170  
ONm171  
ONm172  
ONm173  
ONm174  
ONm175  
ONm176  
ONm177  
ONm178  
ONm179  
ONm180  
ONm181  
ONm182  
ONm183  
ONm184  
ONm185  
ONm186  
ONm187  
ONm188  
ONm189  
ONm190  
ONm191  
ONm192  
ONm193  
ONm194  
ONm195  
ONm196  
ONm197  
ONm198  
ONm199  
ONm200  
ONm201  
ONm202  
ONm203  
ONm204  
ONm205  
ONm206  
ONm207  
ONm208  
ONm209  
ONm210  
ONm211  
ONm212  
ONm213  
ONm214  
ONm215  
ONm216  
ONm217  
ONm218  
ONm219  
ONm220  
ONm221  
ONm222  
ONm223  
ONm224  
ONm225  
ONm226  
ONm227  
ONm228  
ONm229  
ONm230  
ONm231  
ONm232  
ONm233  
ONm234  
ONm235  
ONm236  
ONm237  
ONm238  
ONm239  
ONm240  
ONm241  
ONm242  
ONm243  
ONm244  
ONm245  
ONm246  
ONm247  
ONm248  
ONm249  
ONm250  
ONm251  
ONm252  
ONm253  
ONm254  
ONm255  
ONm256  
ONm257  
ONm258  
ONm259  
ONm260  
ONm261  
ONm262  
ONm263  
ONm264  
ONm265  
ONm266  
ONm267  
ONm268  
ONm269  
ONm270  
ONm271  
ONm272  
ONm273  
ONm274  
ONm275  
ONm276  
ONm277  
ONm278  
ONm279  
ONm280  
ONm281  
ONm282  
ONm283  
ONm284  
ONm285  
ONm286  
ONm287  
ONm288  
ONm289  
ONm290  
ONm291  
ONm292  
ONm293  
ONm294  
ONm295  
ONm296  
ONm297  
ONm298  
ONm299  
ONm300  
ONm301  
ONm302  
ONm303  
ONm304  
ONm305  
ONm306  
ONm307  
ONm308  
ONm309  
ONm310  
ONm311  
ONm312  
ONm313  
ONm314  
ONm315  
ONm316  
ONm317  
ONm318  
ONm319  
ONm320  
ONm321  
ONm322  
ONm323  
ONm324  
ONm325  
ONm326  
ONm327  
ONm328  
ONm329  
ONm330  
ONm331  
ONm332  
ONm333  
ONm334  
ONm335  
ONm336  
ONm337  
ONm338  
ONm339  
ONm340  
ONm341  
ONm342  
ONm343  
ONm344  
ONm345  
ONm346  
ONm347  
ONm348  
ONm349  
ONm350  
ONm351  
ONm352  
ONm353  
ONm354  
ONm355  
ONm356  
ONm357  
ONm358  
ONm359  
ONm360  
ONm361  
ONm362  
ONm363  
ONm364  
ONm365  
ONm366  
ONm367  
ONm368  
ONm369  
ONm370  
ONm371  
ONm372  
ONm373  
ONm374  
ONm375  
ONm376  
ONm377  
ONm378  
ONm379  
ONm380  
ONm381  
ONm382  
ONm383  
ONm384  
ONm385  
ONm386  
ONm387  
ONm388  
ONm389  
ONm390  
ONm391  
ONm392  
ONm393  
ONm394  
ONm395  
ONm396  
ONm397  
ONm398  
ONm399  
ONm400  
ONm401  
ONm402  
ONm403  
ONm404  
ONm405  
ONm406  
ONm407  
ONm408  
ONm409  
ONm410  
ONm411  
ONm412  
ONm413  
ONm414  
ONm415  
ONm416  
ONm417  
ONm418  
ONm419  
ONm420  
ONm421  
ONm422  
ONm423  
ONm424  
ONm425  
ONm426  
ONm427  
ONm428  
ONm429  
ONm430  
ONm431  
ONm432  
ONm433  
ONm434  
ONm435  
ONm436  
ONm437  
ONm438  
ONm439  
ONm440  
ONm441  
ONm442  
ONm443  
ONm444  
ONm445  
ONm446  
ONm447  
ONm448  
ONm449  
ONm450  
ONm451  
ONm452  
ONm453  
ONm454  
ONm455  
ONm456  
ONm457  
ONm458  
ONm459  
ONm460  
ONm461  
ONm462  
ONm463  
ONm464  
ONm465  
ONm466  
ONm467  
ONm468  
ONm469  
ONm470  
ONm471  
ONm472  
ONm473  
ONm474  
ONm475  
ONm476  
ONm477  
ONm478  
ONm479  
ONm480  
ONm481  
ONm482  
ONm483  
ONm484  
ONm485  
ONm486  
ONm487  
ONm488  
ONm489  
ONm490  
ONm491  
ONm492  
ONm493  
ONm494  
ONm495  
ONm496  
ONm497  
ONm498  
ONm499  
ONm500  
ONm501  
ONm502  
ONm503  
ONm504  
ONm505  
ONm506  
ONm507  
ONm508  
ONm509  
ONm510  
ONm511  
ONm512  
ONm513  
ONm514  
ONm515  
ONm516  
ONm517  
ONm518  
ONm519  
ONm520  
ONm521  
ONm522  
ONm523  
ONm524  
ONm525  
ONm526  
ONm527  
ONm528  
ONm529  
ONm530  
ONm531  
ONm532  
ONm533  
ONm534  
ONm535  
ONm536  
ONm537  
ONm538  
ONm539  
ONm540  
ONm541  
ONm542  
ONm543  
ONm544  
ONm545  
ONm546  
ONm547  
ONm548  
ONm549  
ONm550  
ONm551  
ONm552  
ONm553  
ONm554  
ONm555  
ONm556  
ONm557  
ONm558  
ONm559  
ONm560  
ONm561  
ONm562  
ONm563  
ONm564  
ONm565  
ONm566  
ONm567  
ONm568  
ONm569  
ONm570  
ONm571  
ONm572  
ONm573  
ONm574  
ONm575  
ONm576  
ONm577  
ONm578  
ONm579  
ONm580  
ONm581  
ONm582  
ONm583  
ONm584  
ONm585  
ONm586  
ONm587  
ONm588  
ONm589  
ONm590  
ONm591  
ONm592  
ONm593  
ONm594  
ONm595  
ONm596  
ONm597  
ONm598  
ONm599  
ONm600  
ONm601  
ONm602  
ONm603  
ONm604  
ONm605  
ONm606  
ONm607  
ONm608  
ONm609  
ONm610  
ONm611  
ONm612  
ONm613  
ONm614  
ONm615  
ONm616  
ONm617  
ONm618  
ONm619  
ONm620  
ONm621  
ONm622  
ONm623  
ONm624  
ONm625  
ONm626  
ONm627  
ONm628  
ONm629  
ONm630  
ONm631  
ONm632  
ONm633  
ONm634  
ONm635  
ONm636  
ONm637  
ONm638  
ONm639  
ONm640  
ONm641  
ONm642  
ONm643  
ONm644  
ONm645  
ONm646  
ONm647  
ONm648  
ONm649  
ONm650  
ONm651  
ONm652  
ONm653  
ONm654  
ONm655  
ONm656  
ONm657  
ONm658  
ONm659  
ONm660  
ONm661  
ONm662  
ONm663  
ONm664  
ONm665  
ONm666  
ONm667  
ONm668  
ONm669  
ONm670  
ONm671  
ONm672  
ONm673  
ONm674  
ONm675  
ONm676  
ONm677  
ONm678  
ONm679  
ONm680  
ONm681  
ONm682  
ONm683  
ONm684  
ONm685  
ONm686  
ONm687  
ONm688  
ONm689  
ONm690  
ONm691  
ONm692  
ONm693  
ONm694  
ONm695  
ONm696  
ONm697  
ONm698  
ONm699  
ONm700  
ONm701  
ONm702  
ONm703  
ONm704  
ONm705  
ONm706  
ONm707  
ONm708  
ONm709  
ONm710  
ONm711  
ONm712  
ONm713  
ONm714  
ONm715  
ONm716  
ONm717  
ONm718  
ONm719  
ONm720  
ONm721  
ONm722  
ONm723  
ONm724  
ONm725  
ONm726  
ONm727  
ONm728  
ONm729  
ONm730  
ONm731  
ONm732  
ONm733  
ONm734  
ONm735  
ONm736  
ONm737  
ONm738  
ONm739  
ONm740  
ONm741  
ONm742  
ONm743  
ONm744  
ONm745  
ONm746  
ONm747  
ONm748  
ONm749  
ONm750  
ONm751  
ONm752  
ONm753  
ONm754  
ONm755  
ONm756  
ONm757  
ONm758  
ONm759  
ONm760  
ONm761  
ONm762  
ONm763  
ONm764  
ONm765  
ONm766  
ONm767  
ONm768  
ONm769  
ONm770  
ONm771  
ONm772  
ONm773  
ONm774  
ONm775  
ONm776  
ONm777  
ONm778  
ONm779  
ONm780  
ONm781  
ONm782  
ONm783  
ONm784  
ONm785  
ONm786  
ONm787  
ONm788  
ONm789  
ONm790  
ONm791  
ONm792  
ONm793  
ONm794  
ONm795  
ONm796  
ONm797  
ONm798  
ONm799  
ONm800  
ONm801  
ONm802  
ONm803  
ONm804  
ONm805  
ONm806  
ONm807  
ONm808  
ONm809  
ONm810  
ONm811  
ONm812  
ONm813  
ONm814  
ONm815  
ONm816  
ONm817  
ONm818  
ONm819  
ONm820  
ONm821  
ONm822  
ONm823  
ONm824  
ONm825  
ONm826  
ONm827  
ONm828  
ONm829  
ONm830  
ONm831  
ONm832  
ONm833  
ONm834  
ONm835  
ONm836  
ONm837  
ONm838  
ONm839  
ONm840  
ONm841  
ONm842  
ONm843  
ONm844  
ONm845  
ONm846  
ONm847  
ONm848  
ONm849  
ONm850  
ONm851  
ONm852  
ONm853  
ONm854  
ONm855  
ONm856  
ONm857  
ONm858  
ONm859  
ONm860  
ONm861  
ONm862  
ONm863  
ONm864  
ONm865  
ONm866  
ONm867  
ONm868  
ONm869  
ONm870  
ONm871  
ONm872  
ONm873  
ONm874  
ONm875  
ONm876  
ONm877  
ONm878  
ONm879  
ONm880  
ONm881  
ONm882  
ONm883  
ONm884  
ONm885  
ONm886  
ONm887  
ONm888  
ONm889  
ONm890  
ONm891  
ONm892  
ONm893  
ONm894  
ONm895  
ONm896  
ONm897  
ONm898  
ONm899  
ONm900  
ONm901  
ONm902  
ONm903  
ONm904  
ONm905  
ONm906  
ONm907  
ONm908  
ONm909  
ONm910  
ONm911  
ONm912  
ONm913  
ONm914  
ONm915  
ONm916  
ONm917  
ONm918  
ONm919  
ONm920  
ONm921  
ONm922  
ONm923  
ONm924  
ONm925  
ONm926  
ONm927  
ONm928  
ONm929  
ONm930  
ONm931  
ONm932  
ONm933  
ONm934  
ONm935  
ONm936  
ONm937  
ONm938  
ONm939  
ONm940  
ONm941  
ONm942  
ONm943  
ONm944  
ONm945  
ONm946  
ONm947  
ONm948  
ONm949  
ONm950  
ONm951  
ONm952  
ONm953  
ONm954  
ONm955  
ONm956  
ONm957  
ONm958  
ONm959  
ONm960  
ONm961  
ONm962  
ONm963  
ONm964  
ONm965  
ONm966  
ONm967  
ONm968  
ONm969  
ONm970  
ONm971  
ONm972  
ONm973  
ONm974  
ONm975  
ONm976  
ONm977  
ONm978  
ONm979  
ONm980  
ONm981  
ONm982  
ONm983  
ONm984  
ONm985  
ONm986  
ONm987  
ONm988  
ONm989  
ONm990  
ONm991  
ONm992  
ONm993  
ONm994  
ONm995  
ONm996  
ONm997  
ONm998  
ONm999  
ONm1000

### Color Key

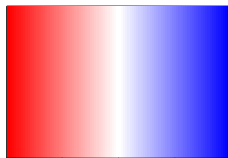

-2 0 2  
Value

### Pattern109 2 genes

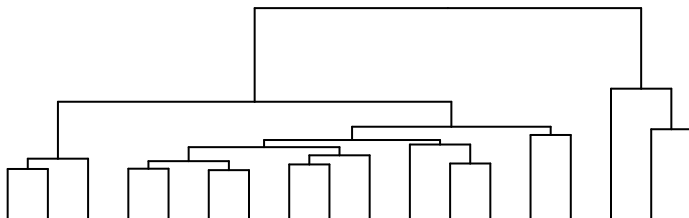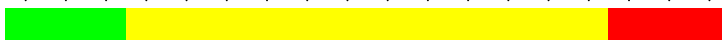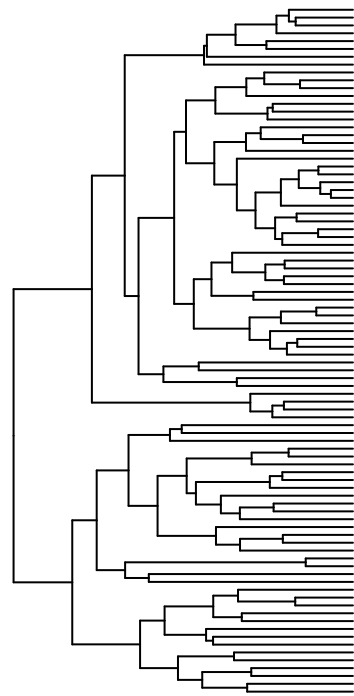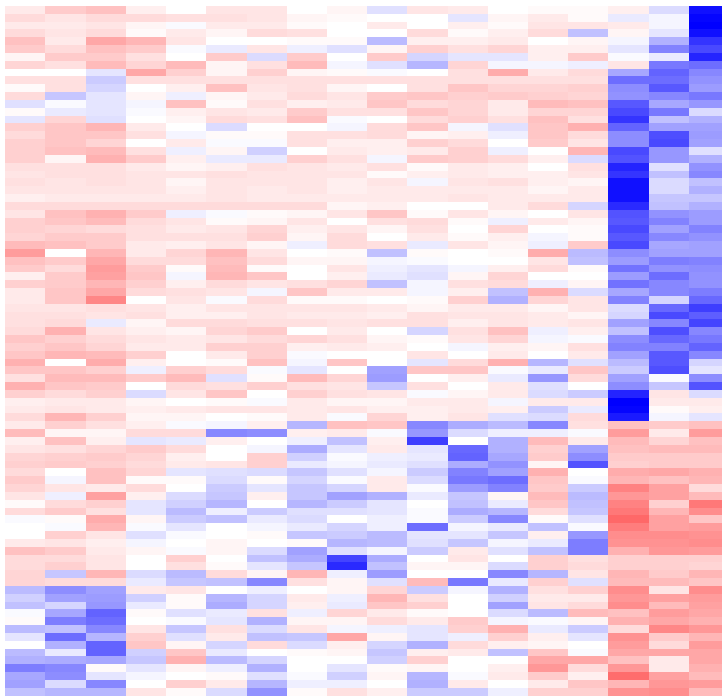

ON2  
ON1  
ON3  
ONm3  
Pi2  
ONm1  
BCm3  
Pim2  
BCm2  
Pi1  
ONm2  
Pi3  
Pim3  
BCm1  
Pim1  
BC1  
BC3  
BC2

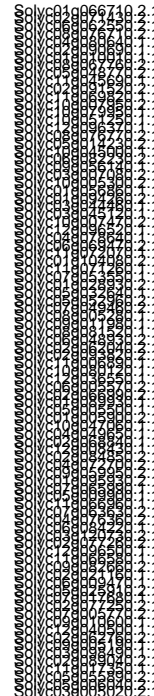

### Color Key

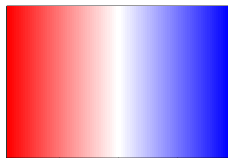

-2 0 2  
Value

### Pattern110 2 genes

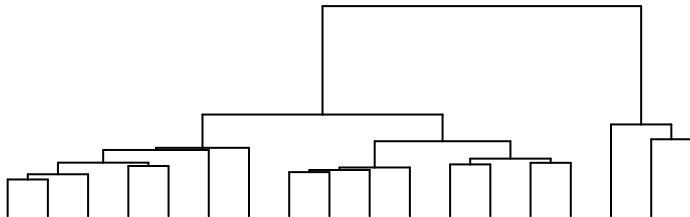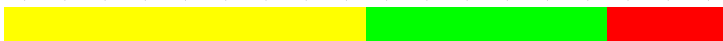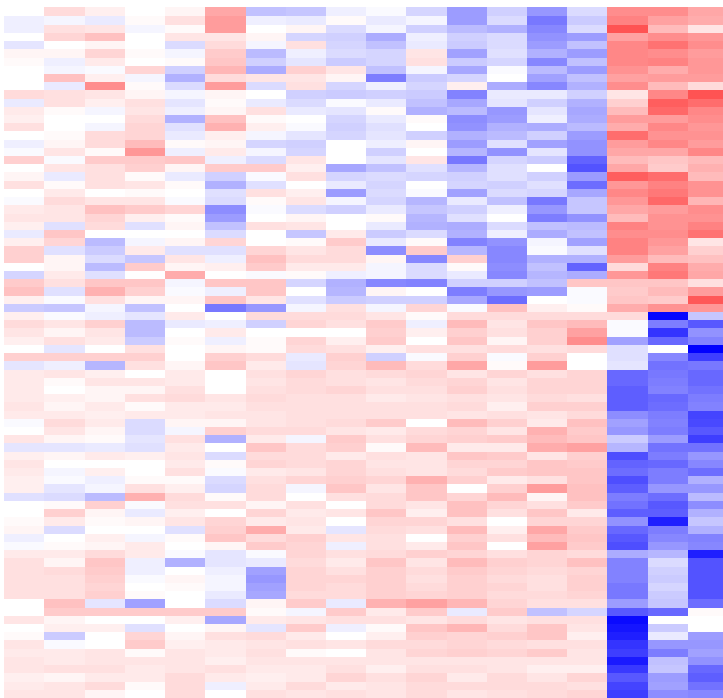

BCm2  
Pi2  
ONm2  
Pi1  
BCm3  
BCm1  
ONm3  
Pi3  
ONm1  
ON2  
Pim1  
Pim2  
ON1  
ON3  
Pim3  
BC1  
BC2  
BC3

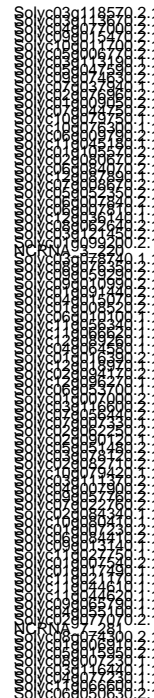

Gene1  
Gene2  
Gene3  
Gene4  
Gene5  
Gene6  
Gene7  
Gene8  
Gene9  
Gene10  
Gene11  
Gene12  
Gene13  
Gene14  
Gene15  
Gene16  
Gene17  
Gene18  
Gene19  
Gene20  
Gene21  
Gene22  
Gene23  
Gene24  
Gene25  
Gene26  
Gene27  
Gene28  
Gene29  
Gene30  
Gene31  
Gene32  
Gene33  
Gene34  
Gene35  
Gene36  
Gene37  
Gene38  
Gene39  
Gene40  
Gene41  
Gene42  
Gene43  
Gene44  
Gene45  
Gene46  
Gene47  
Gene48  
Gene49  
Gene50  
Gene51  
Gene52  
Gene53  
Gene54  
Gene55  
Gene56  
Gene57  
Gene58  
Gene59  
Gene60  
Gene61  
Gene62  
Gene63  
Gene64  
Gene65  
Gene66  
Gene67  
Gene68  
Gene69  
Gene70  
Gene71  
Gene72  
Gene73  
Gene74  
Gene75  
Gene76  
Gene77  
Gene78  
Gene79  
Gene80  
Gene81  
Gene82  
Gene83  
Gene84  
Gene85  
Gene86  
Gene87  
Gene88  
Gene89  
Gene90  
Gene91  
Gene92  
Gene93  
Gene94  
Gene95  
Gene96  
Gene97  
Gene98  
Gene99  
Gene100



### Color Key

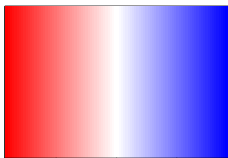

-2 0 2  
Value

### Pattern35 2 genes

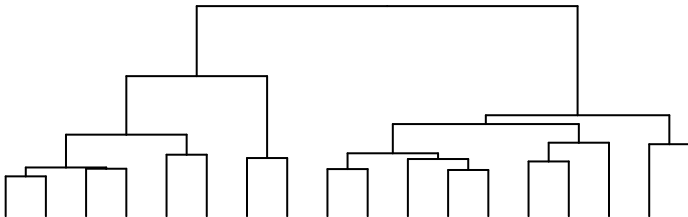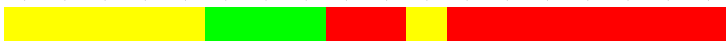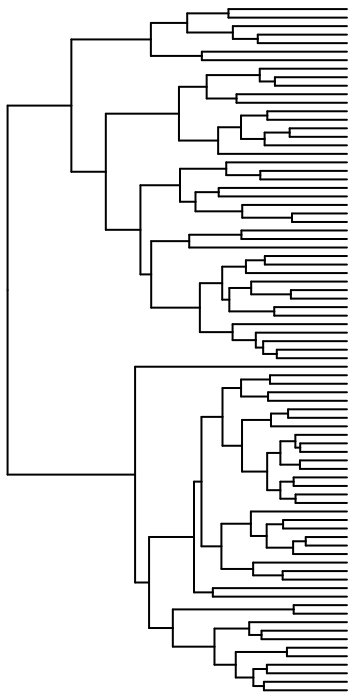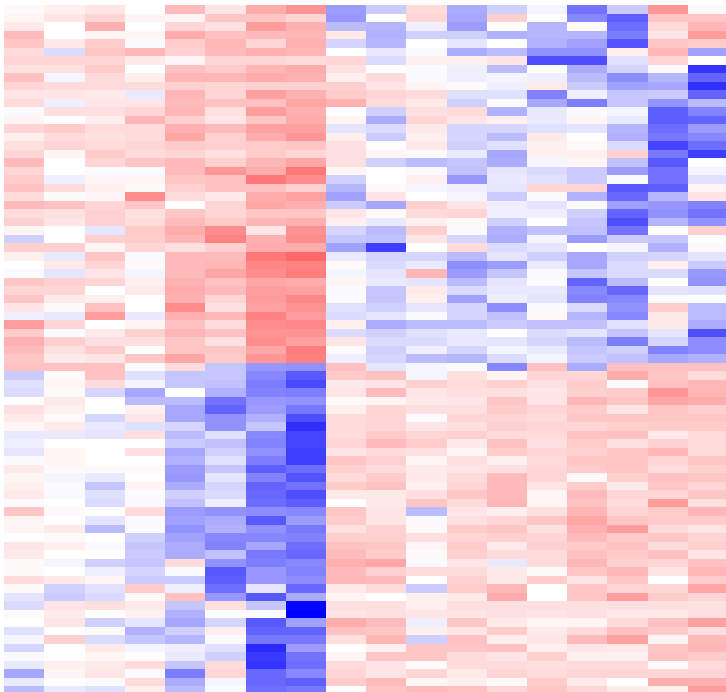

ONm1 P12 ONm2 P11 P13 Pim1 Pim2 Pim3 ON1 BCm3 ONm3 BCm2 ON3 ON2 BC2 BC3 BCm1 BC1

Gene names and values listed vertically on the right side of the heatmap, including ONm1, P12, ONm2, P11, P13, Pim1, Pim2, Pim3, ON1, BCm3, ONm3, BCm2, ON3, ON2, BC2, BC3, BCm1, BC1, and many others.

### Color Key

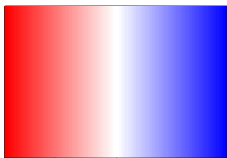

-2 0 2  
Value

### Pattern82 2 genes

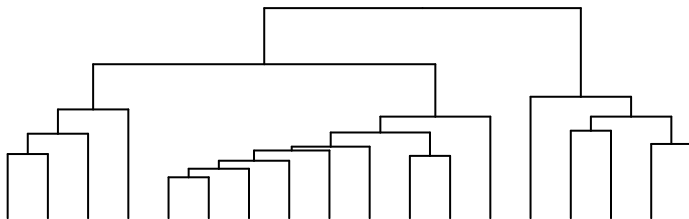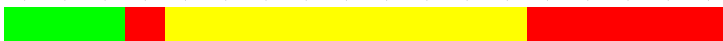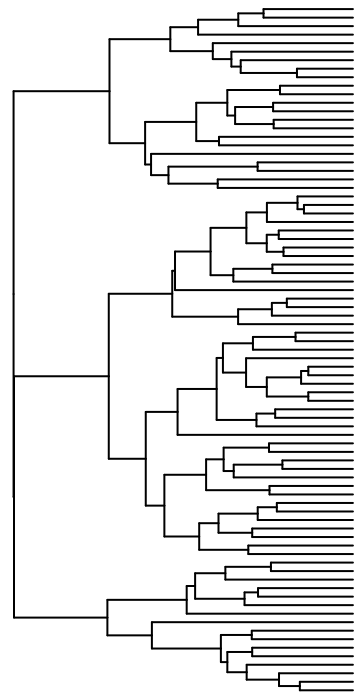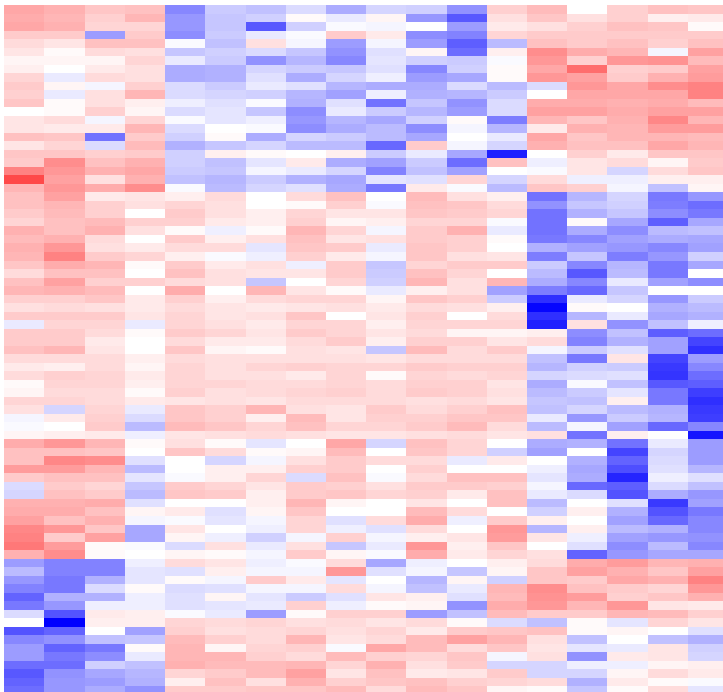

Pim2 Pim3 Pim1 Pi3 BCm3 ON2 BCm2 ON3 ONm2 ONm3 ONm1 ON1 BCm1 BC1 Pi1 Pi2 BC3 BC2

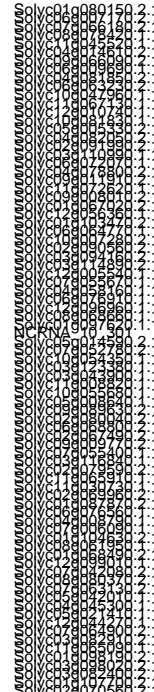









### Color Key

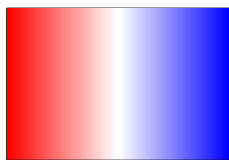

-3   -1   1   3  
Value

### Pattern115 2 genes

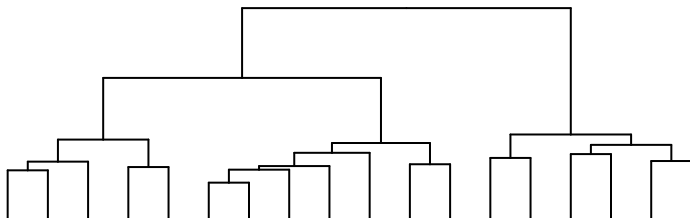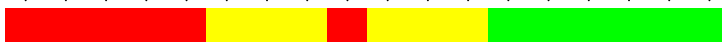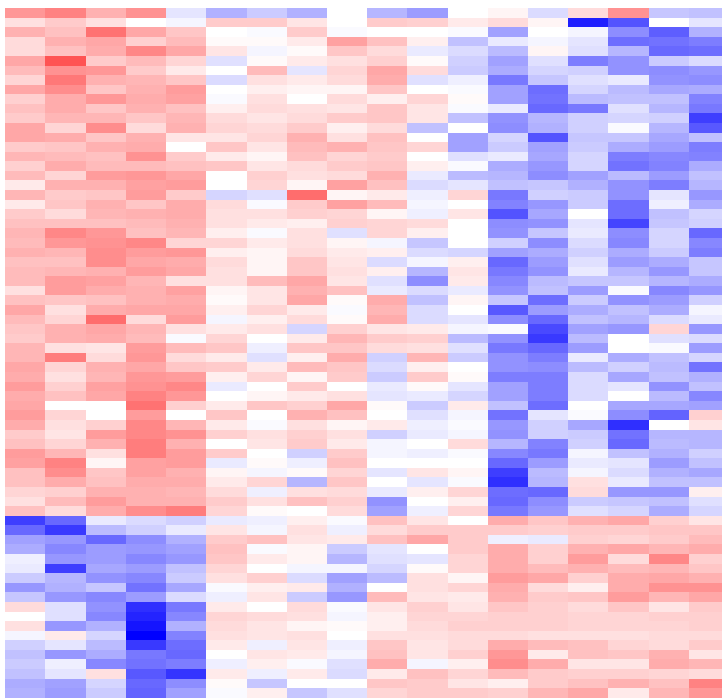

Pi2 BC1 Pi1 BC2 BC3 BCm2 Pim2 Pim1 Pi3 BCm1 Pim3 BCm3 ON3 ONm3 ON2 ONm2 ONm1 ON1

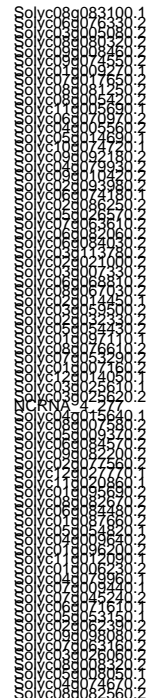

Gene labels corresponding to the rows of the heatmap, including Pi2, BC1, Pi1, BC2, BC3, BCm2, Pim2, Pim1, Pi3, BCm1, Pim3, BCm3, ON3, ONm3, ON2, ONm2, ONm1, ON1.



### Color Key

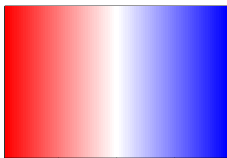

-2 0 2  
Value

### Pattern28 2 genes

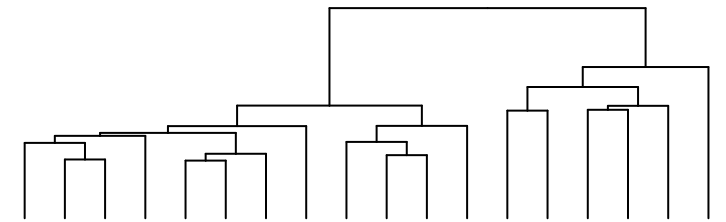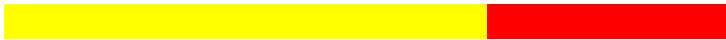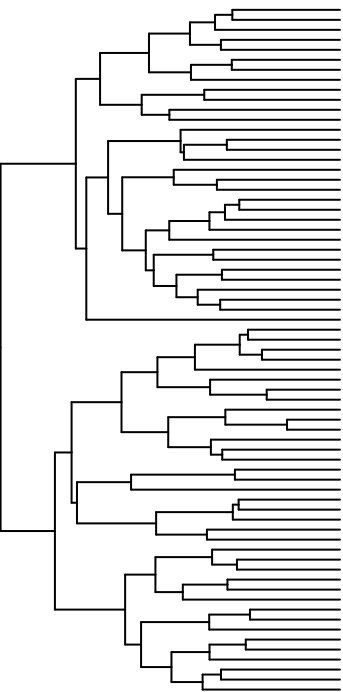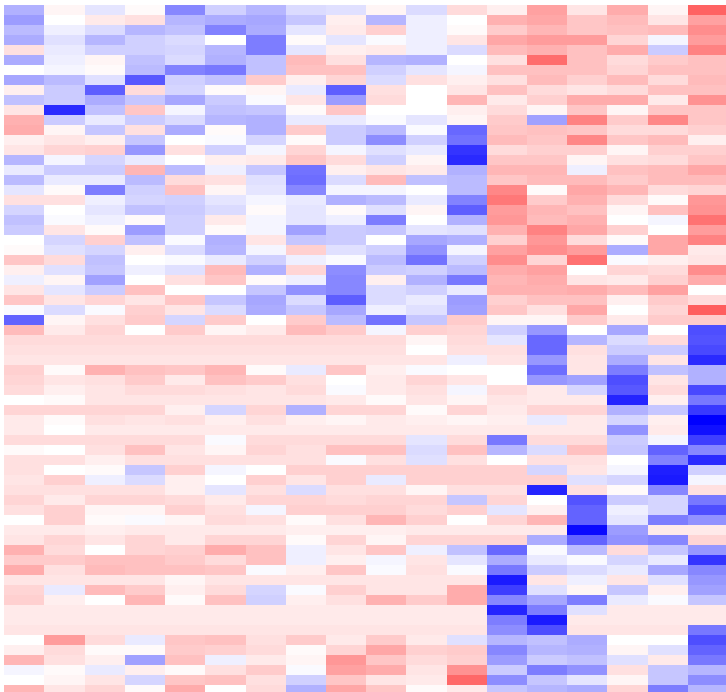

P11 ON2 BCm3 Pim1 BCm2 P13 Pim3 ON1 P12 ON3 Pim2 BCm1 ONm2 BC3 BC2 ONm3 ONm1 BC1

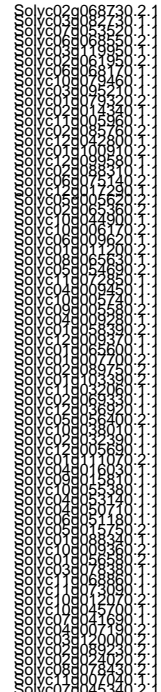











### Color Key

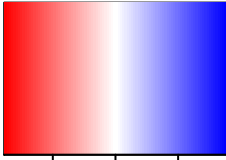

-2 0 2

Value

### Pattern27 2 genes

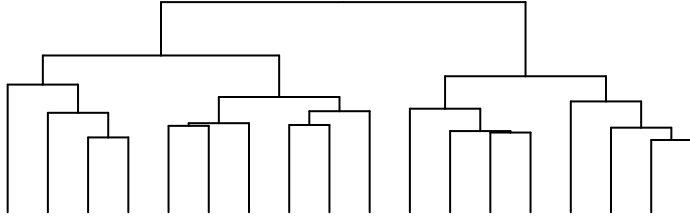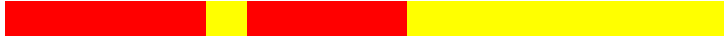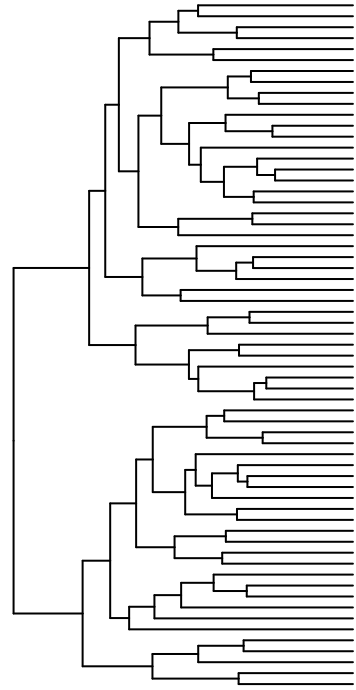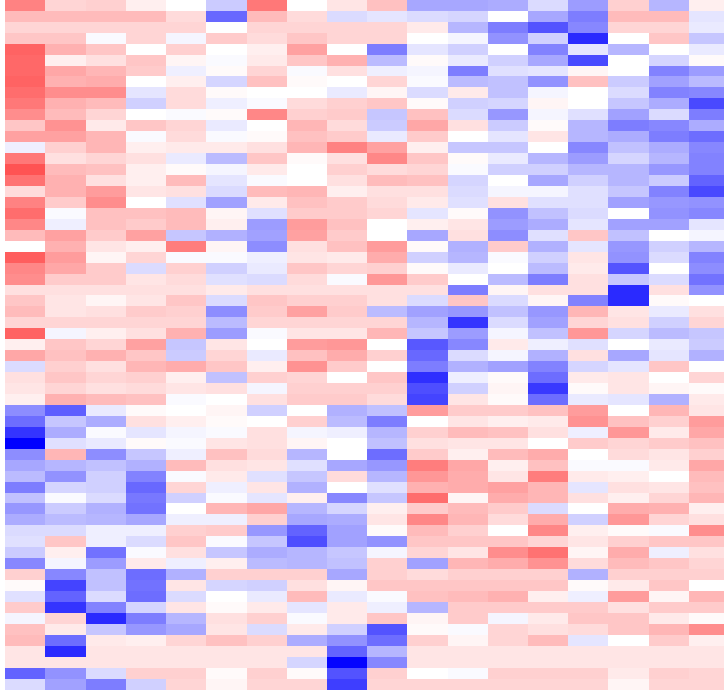

BC1  
ONm2  
Pim2  
BC2  
ONm3  
Pi3  
Pim1  
ONm1  
Pim3  
BC3  
BCm1  
ON3  
ON2  
Pi2  
ON1  
Pi1  
BCm3  
BCm2

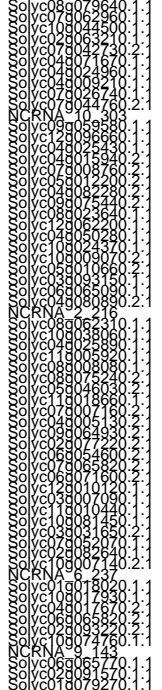

BC1  
ONm2  
Pim2  
BC2  
ONm3  
Pi3  
Pim1  
ONm1  
Pim3  
BC3  
BCm1  
ON3  
ON2  
Pi2  
ON1  
Pi1  
BCm3  
BCm2





### Color Key

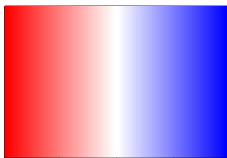

-2 0 2  
Value

### Pattern21 2 genes

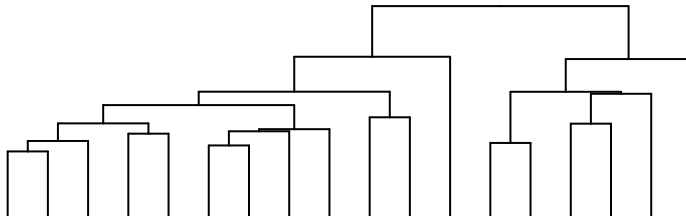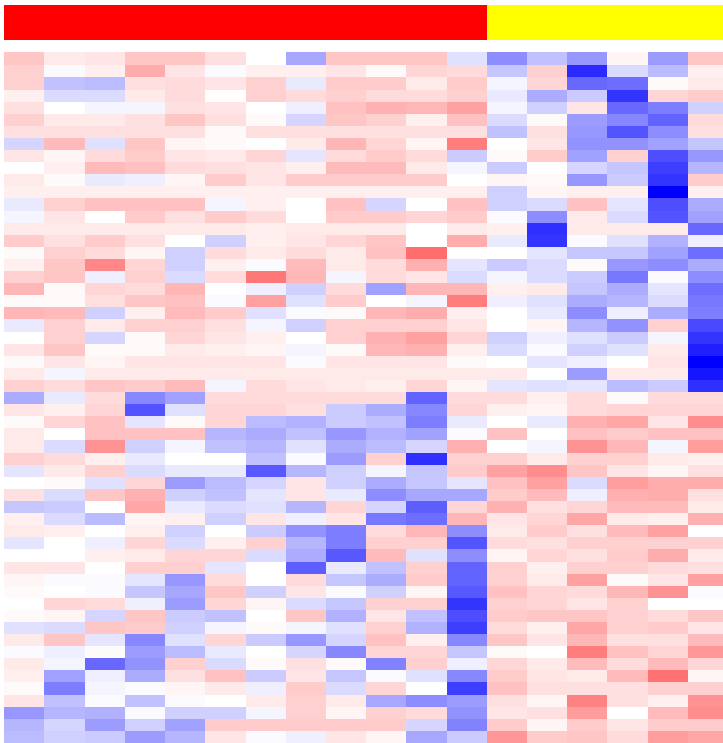

PI3  
PI1  
Pim1  
ON3  
Pim3  
ON2  
Pim2  
ON1  
PI2  
BC3  
BC2  
BC1  
BCm3  
ONm3  
ONm2  
BCm2  
ONm1  
BCm1

Solv\_c04g071680.1.1  
vC0100016284  
vC0100062400.1.1  
vC0100073080.2.1  
vC010109510.2.1  
vC01079014680.2.1  
vC0108007570.2.1  
vC0108007760.2.1  
vC0109089500.2.1  
vC0109089840.2.1  
vC0109091290.2.1  
vC0109093680.1.1  
vC0110066810.1.1  
vC01110156  
vC01030112250.1.1  
vC01030141020.2.1  
vC011006080.1.1  
vC0109042960.1.1  
vC0109007710.2.1  
vC01090062860.2.1  
vC0109005600.2.1  
vC0109123460.2.1  
vC0109017690.1.1  
vC0109050010.2.1  
vC0109096120.1.1  
vC0109086280.1.1  
vC010909910.1.1  
vC0109065290.1.1  
vC010907580.2.1  
vC010900980.1.1  
vC01090317  
vC0109009450.1.1  
vC0109053370.1.1  
vC010906570.2.1  
vC010111360.2.1  
vC0109065570.2.1  
vC0109060280.2.1  
vC0109071190.2.1  
vC12007290.1.1  
vC0109012650.1.1  
vC0109083500.2.1  
vC12010040.1.1  
vC0109083930.1.1  
vC0109054360.2.1  
vC0108006120.1.1  
vC010909980.1.1  
vC0109005810.2.1  
vC0109054360.2.1  
vC0109060190.1.1  
vC0109062950.1.1  
vC010901060.1.1

### Color Key

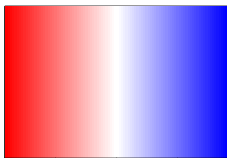

-2 0 2  
Value

### Pattern33 2 genes

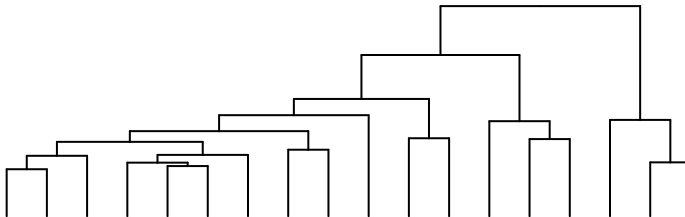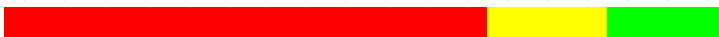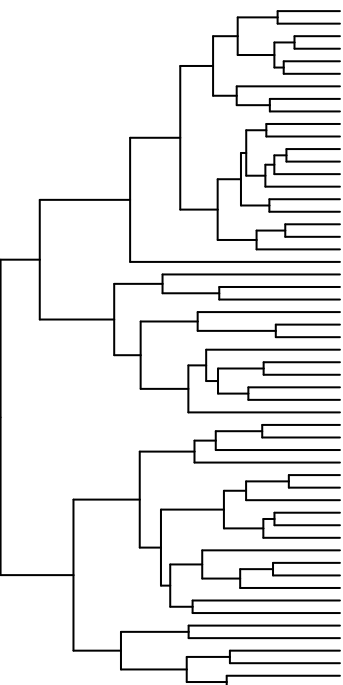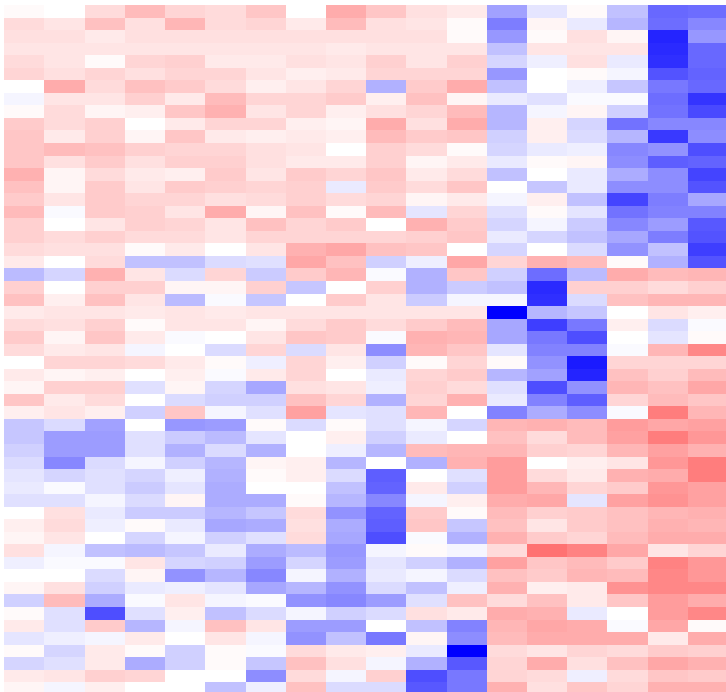

ON1  
ONm2  
BCm3  
BCm2  
ON2  
BC2  
ONm3  
ONm1  
ON3  
BC3  
BCm1  
BC1  
Pi3  
Pi2  
Pi1  
Pim1  
Pim2  
Pim3

Solyc11g044560.1.1  
Solyc02g093910.2.1  
Solyc08g066690.2.1  
Solyc09g063770.1.1  
Solyc02g091690.2.1  
Solyc03g114700.1.1  
Solyc08g069270.1.1  
Solyc06g051950.2.1  
Solyc01g108110.2.1  
Solyc10g084650.1.1  
Solyc02g067350.2.1  
Solyc06g009120.2.1  
Solyc11g012850.1.1  
Solyc08g006160.2.1  
Solyc01g0996630.2.1  
Solyc10g079620.1.1  
Solyc03g116570.2.1  
Solyc01g107470.2.1  
Solyc02g084420.2.1  
Solyc12g094600.1.1  
Solyc05g056390.2.1  
Solyc11g064780.1.1  
Solyc06g0035910.1.1  
Solyc10g078760.1.1  
Solyc02g080010.2.1  
Solyc02g080020.2.1  
Solyc02g071640.1.1  
Solyc01g0008610.2.1  
Solyc01g098370.1.1  
Solyc02g014030.1.1  
Solyc02g085360.2.1  
Solyc10g006760.2.1  
Solyc04g078880.2.1  
Solyc03g112220.1.1  
Solyc09g04360.2.1  
cCRNA\_12\_379  
Solyc05g052800.2.1  
Solyc02g079580.2.1  
Solyc02g067810.1.1  
Solyc02g076410.2.1  
Solyc09g008750.1.1  
Solyc01g087840.2.1  
Solyc02g094630.2.1  
Solyc08g016280.1.1  
Solyc04g05210.2.1  
Solyc08g077690.2.1  
Solyc02g076850.1.1  
Solyc08g065580.1.1  
Solyc01g066040.2.1  
Solyc01g049420.1.1  
Solyc01g066040.2.1  
Solyc02g093280.2.1

### Color Key

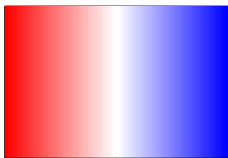

-2 0 2  
Value

### Pattern15 2 genes

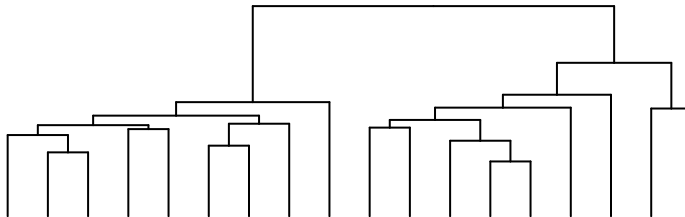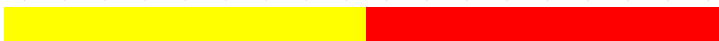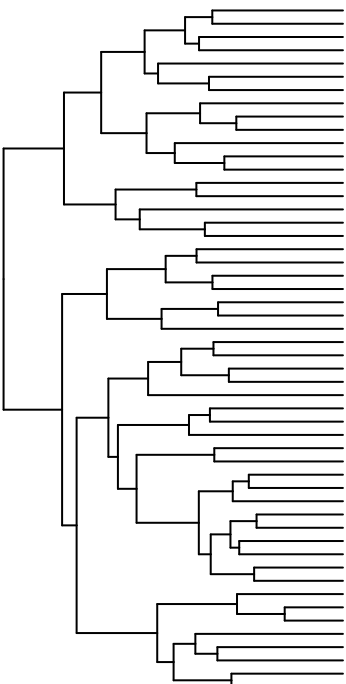

Pl2  
ONm1  
ON3  
Pl3  
Pl1  
ON2  
ONm2  
ON1  
ONm3  
BCm3  
Plm3  
BC3  
Plm2  
BCm2  
Plm1  
BC2  
BCm1  
BC1

Solyc05g041470.2.1  
Solyc04g039990.2.1  
Solyc10g011760.2.1  
Solyc09g011970.2.1  
Solyc01g0005740.2.1  
Solyc12g019180.1.1  
Solyc06g065630.2.1  
Solyc03g093930.2.1  
Solyc06g048910.1.1  
Solyc11g062150.1.1  
Solyc02g063440.2.1  
Solyc05g056150.2.1  
Solyc09g011060.2.1  
Solyc04g010330.2.1  
Solyc02g072040.2.1  
Solyc06g051910.1.1  
Solyc05g051760.2.1  
Solyc01g097090.1.1  
Solyc01g100300.2.1  
Solyc11g012500.1.1  
Solyc07g042670.1.1  
Solyc12g062670.1.1  
Solyc03g005380.2.1  
Solyc06g072290.2.1  
Solyc01g099530.1.1  
Solyc04g078320.2.1  
Solyc03g025290.2.1  
Solyc06g008380.1.1  
Solyc07g063420.2.1  
Solyc11g006740.1.1  
Solyc03g119530.2.1  
Solyc03g122130.2.1  
Solyc03g051650.1.1  
Solyc07g063800.1.1  
Solyc03g063100.1.1  
Solyc01g106900.2.1  
Solyc05g023740.2.1  
Solyc05g008060.2.1  
Solyc06g063260.2.1  
Solyc11g065350.1.1  
Solyc11g070180.1.1  
Solyc09g050010.1.1  
Solyc02g092360.2.1  
Solyc08g065160.2.1  
Solyc09g031730.1.1  
Solyc01g066910.2.1  
Solyc04g015530.1.1  
Solyc01g088120.1.1  
Solyc06g066700.1.1  
Solyc06g067650.2.1  
Solyc04g083360.2.1  
Solyc08g061260.2.1



### Color Key

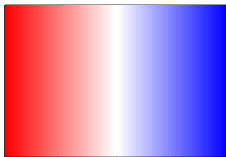

-2 0 2  
Value

### Pattern114 2 genes

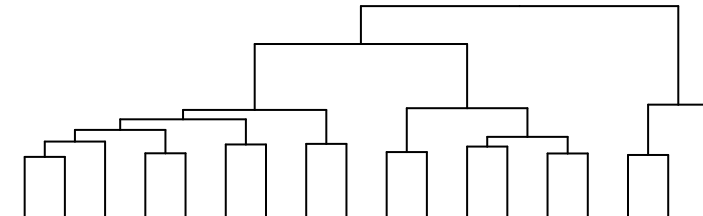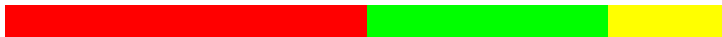

Solyc04g074490.2.1  
Solyc01g099190.2.1  
Solyc03g121420.2.1  
Solyc02g091040.2.1  
Solyc06g068720.2.1  
Solyc08g078090.1.1  
Solyc09g007450.2.1  
Solyc11g070170.1.1  
Solyc02g087000.2.1  
Solyc02g066800.1.1  
Solyc09g082960.1.1  
NCRNA\_12\_113  
NCRNA\_12\_175  
Solyc11g007950.1.1  
Solyc09g011700.1.1  
Solyc03g025260.1.1  
Solyc05g007750.2.1  
Solyc02g087980.2.1  
Solyc08g023280.2.1  
Solyc03g093250.1.1  
Solyc04g015710.2.1  
Solyc02g093400.1.1  
Solyc07g041770.1.1  
Solyc02g065350.2.1  
Solyc12g006240.1.1  
Solyc06g084090.2.1  
Solyc06g008980.2.1  
Solyc08g080720.2.1  
Solyc06g048920.2.1  
Solyc08g014000.2.1  
Solyc08g082650.2.1  
Solyc06g030560.1.1  
Solyc02g033040.2.1  
Solyc10g079090.1.1  
Solyc04g012020.1.1  
Solyc01g079850.2.1  
Solyc03g098450.2.1  
Solyc02g068170.1.1  
Solyc06g036390.1.1  
Solyc12g098610.1.1  
Solyc12g019140.1.1  
Solyc12g009500.1.1  
Solyc01g014700.2.1  
Solyc05g051290.2.1  
Solyc09g061830.1.1  
Solyc03g083490.2.1  
Solyc06g050760.1.1  
Solyc01g079360.2.1  
Solyc08g062180.1.1

Pim3 P13 Pim2 P11 BC2 BC3 P12 BC1 Pim1 ON1 ONm1 ON3 ONm3 ON2 ONm2 BCm2 BCm3 BCm1

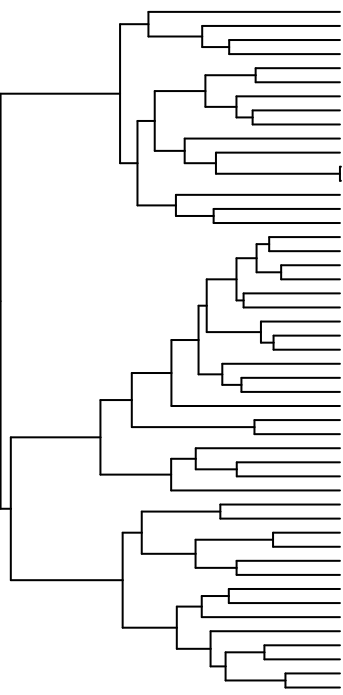

### Color Key

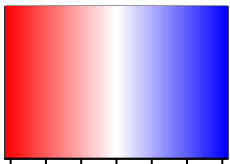

-3 -1 1 2 3  
Value

### Pattern171 2 genes

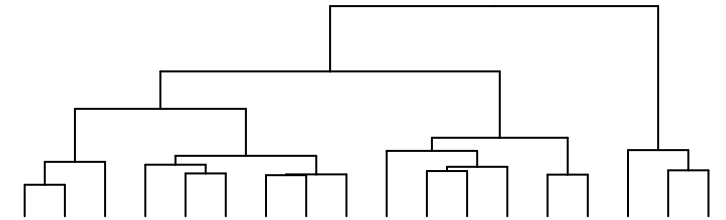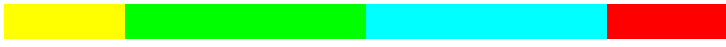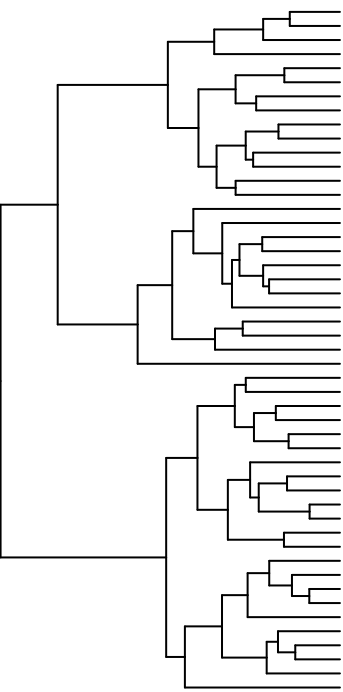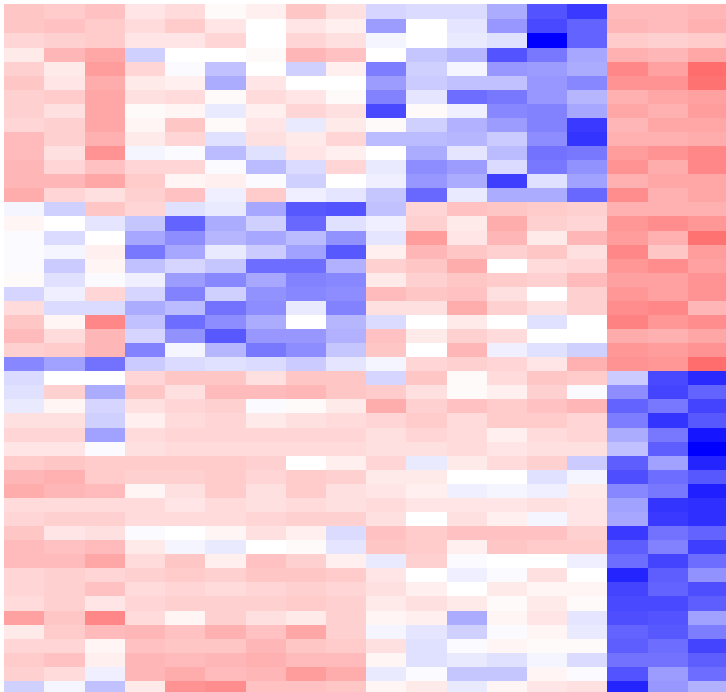

BCm2 BCm3 BCm1 ON2 ON1 ONm2 ONm1 ON3 ONm3 Pim1 Pi2 Pi1 Pi3 Pim3 Pim2 BC2 BC3 BC1

Solyc06g005330.2.1  
Solyc05g013440.2.1  
Solyc04g072790.1.1  
Solyc04g080650.2.1  
Solyc09g015490.2.1  
Solyc06g072800.2.1  
Solyc06g060620.2.1  
Solyc01g108570.2.1  
Solyc11g042820.1.1  
Solyc03g120290.2.1  
Solyc04g078650.2.1  
Solyc03g058910.2.1  
Solyc01g104780.2.1  
Solyc01g105320.2.1  
Solyc07g014620.1.1  
Solyc02g077430.2.1  
Solyc08g082320.2.1  
Solyc11g008670.1.1  
Solyc02g044030.1.1  
Solyc01g095700.2.1  
Solyc11g066790.1.1  
Solyc03g111380.2.1  
Solyc06g083030.2.1  
Solyc11g010130.1.1  
Solyc09g018490.2.1  
Solyc03g121260.2.1  
Solyc07g006610.2.1  
Solyc09g090300.2.1  
Solyc04g016410.2.1  
Solyc04g009780.1.1  
Solyc03g006470.2.1  
Solyc09g098000.2.1  
Solyc07g065160.2.1  
Solyc03g112060.2.1  
Solyc04g008620.2.1  
Solyc08g067640.1.1  
Solyc09g074350.1.1  
Solyc01g073970.2.1  
Solyc05g009420.1.1  
Solyc08g065880.2.1  
Solyc06g084370.1.1  
Solyc04g051500.2.1  
Solyc09g007860.2.1  
Solyc04g076960.2.1  
Solyc02g069310.2.1  
Solyc05g013780.2.1  
Solyc01g068000.2.1  
Solyc07g006130.1.1  
Solyc12g088450.1.1

### Color Key

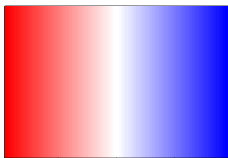

-2 0 2  
Value

### Pattern26 2 genes

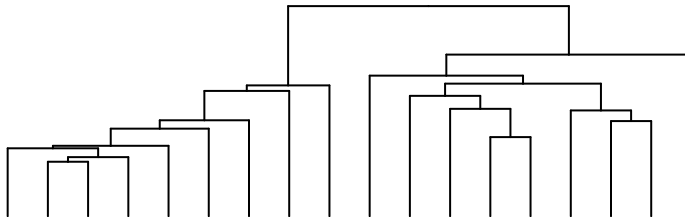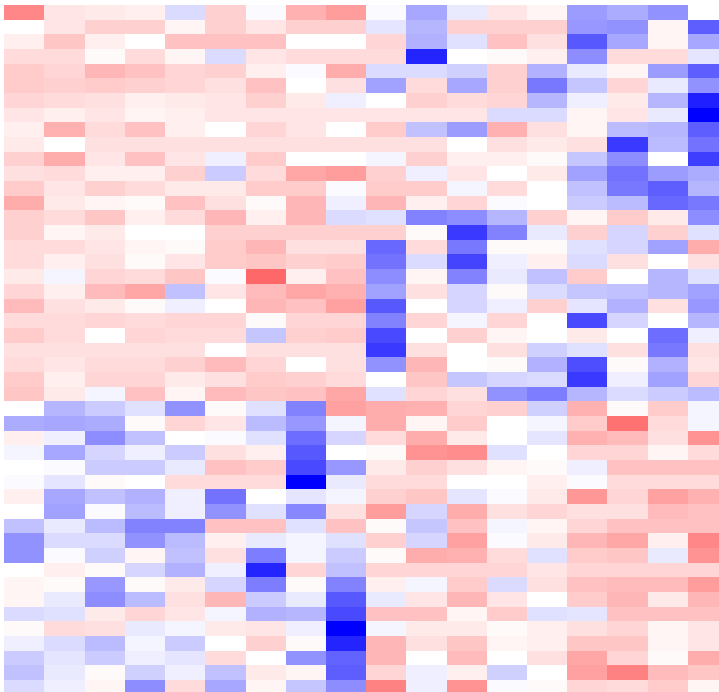

Solyc05g021110.2.1  
Solyc04g081250.1.1  
Solyc05g045730.1.1  
Solyc10g018370.1.1  
Solyc10g005600.2.1  
Solyc04g015220.2.1  
Solyc02g081180.1.1  
Solyc09g082310.1.1  
Solyc06g075130.2.1  
NCRNA\_2\_242  
Solyc01g060450.2.1  
Solyc04g082690.1.1  
Solyc09g011500.2.1  
Solyc04g078270.2.1  
NCRNA\_2\_6  
Solyc04g054450.1.1  
Solyc05g012820.1.1  
Solyc02g081990.2.1  
Solyc07g005420.1.1  
Solyc08g014290.1.1  
Solyc09g090890.1.1  
Solyc06g074150.2.1  
Solyc02g077550.2.1  
Solyc11g030940.1.1  
Solyc12g005550.1.1  
Solyc04g051690.2.1  
Solyc05g056570.2.1  
Solyc11g045390.1.1  
Solyc01g021720.1.1  
Solyc03g044800.1.1  
NCRNA\_7\_269  
NCRNA\_5\_235  
Solyc02g087790.1.1  
Solyc01g107440.2.1  
Solyc01g087170.2.1  
Solyc10g012310.1.1  
Solyc09g097880.2.1  
Solyc02g088150.1.1  
Solyc10g008440.2.1  
NCRNA\_9\_287  
TRNA\_4\_14  
Solyc04g050300.1.1  
Solyc05g006700.2.1  
Solyc03g031940.2.1  
Solyc09g009100.2.1  
Solyc02g088440.1.1  
Solyc06g073670.2.1

Pim3  
BCm2  
BCm3  
Pim2  
ON2  
Pim1  
ON1  
ON3  
BCm1  
BC3  
ONm1  
BC2  
Pi3  
ONm3  
Pi1  
ONm2  
Pi2  
BC1

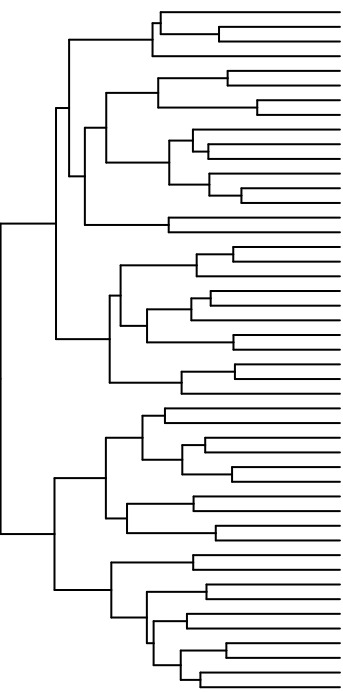

### Color Key

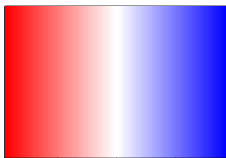

-2 0 2  
Value

### Pattern54 2 genes

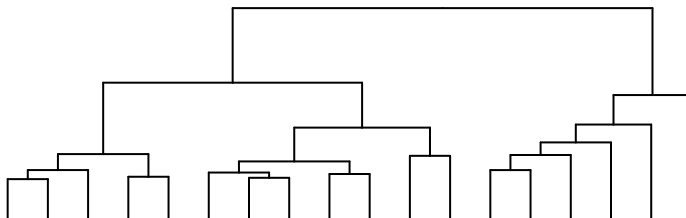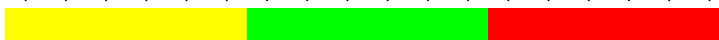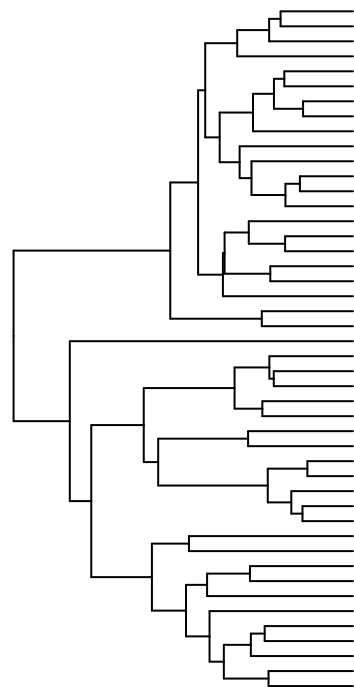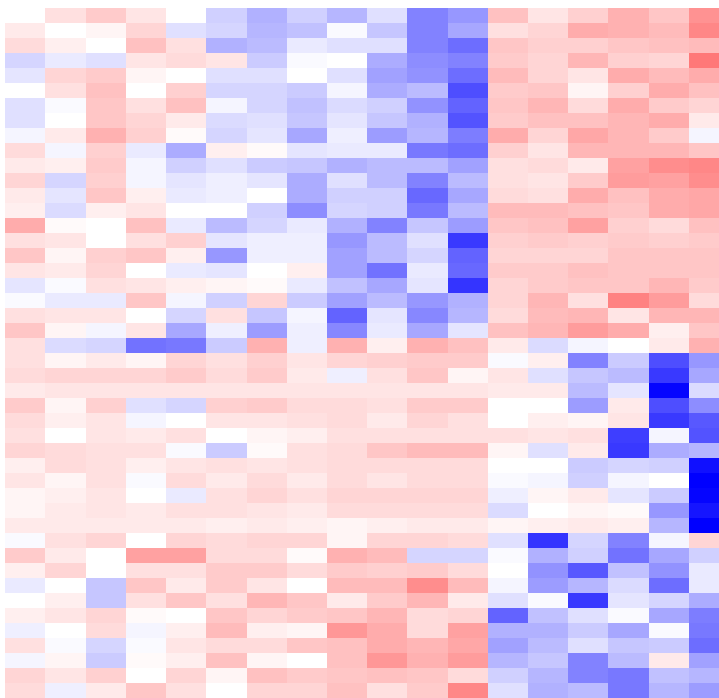

ON3 ON2 P11 P12 ON1 P13 Pim1 ONm3 ONm1 Pim2 ONm2 Pim3 BCm2 BCm3 BC3 BC2 BC1 BCm1

Solyc03g121630.2.1  
Solyc09g042750.2.1  
Solyc01g103920.2.1  
Solyc05g008000.2.1  
Solyc11g013010.1.1  
Solyc02g071100.2.1  
Solyc12g006810.1.1  
Solyc02g086370.2.1  
Solyc08g075940.1.1  
Solyc08g005890.2.1  
Solyc11g071420.1.1  
Solyc03g094010.2.1  
Solyc02g067480.2.1  
Solyc01g008010.2.1  
Solyc01g111100.2.1  
Solyc04g079700.2.1  
Solyc06g036470.1.1  
Solyc01g098570.2.1  
Solyc09g007710.2.1  
Solyc10g081050.1.1  
Solyc10g084590.2.1  
Solyc07g045320.2.1  
NCRNA\_4\_14  
Solyc02g093950.2.1  
Solyc05g020010.1.1  
Solyc08g080630.2.1  
Solyc02g068330.1.1  
Solyc06g064510.2.1  
Solyc06g083020.1.1  
Solyc06g073140.1.1  
Solyc06g068260.1.1  
Solyc06g068250.1.1  
Solyc12g006600.1.1  
Solyc04g074400.1.1  
Solyc05g046150.2.1  
Solyc07g064380.2.1  
Solyc02g011780.1.1  
Solyc11g056320.1.1  
Solyc12g049430.1.1  
Solyc03g118190.2.1  
Solyc06g074420.1.1  
Solyc08g076830.1.1  
Solyc07g047670.2.1  
Solyc04g079410.2.1  
Solyc08g006770.2.1  
Solyc12g099600.1.1

### Color Key

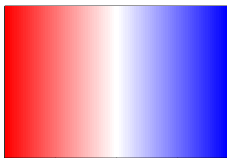

-2 0 2  
Value

### Pattern10 2 genes

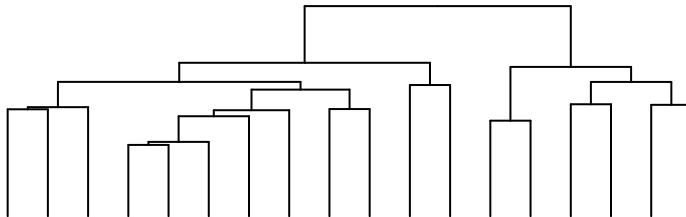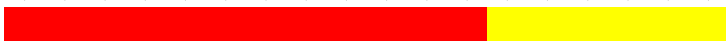

Solyc03g025170.1.1  
Solyc03g122100.1.1  
Solyc02g092900.1.1  
Solyc03g095660.1.1  
Solyc01g080990.2.1  
Solyc01g081410.2.1  
Solyc04g014440.2.1  
Solyc04g008130.1.1  
Solyc12g009260.1.1  
Solyc08g044300.1.1  
Solyc12g044360.1.1  
Solyc07g051890.1.1  
Solyc01g087320.2.1  
Solyc01g005280.2.1  
Solyc10g018640.1.1  
Solyc09g059990.1.1  
Solyc01g091240.2.1  
Solyc05g015740.1.1  
NCRNA\_10\_226  
Solyc12g098870.1.1  
Solyc08g078640.1.1  
Solyc01g065510.2.1  
Solyc07g062120.2.1  
Solyc03g063650.1.1  
Solyc07g052800.1.1  
Solyc07g045260.1.1  
NCRNA\_6\_224  
Solyc01g108990.2.1  
NCRNA\_10\_302  
Solyc09g059350.1.1  
Solyc02g069270.2.1  
Solyc09g075170.1.1  
Solyc08g066690.2.1  
NCRNA\_4\_256  
Solyc08g006850.2.1  
NCRNA\_10\_53  
Solyc04g005580.1.1  
Solyc12g088770.1.1  
Solyc12g062600.1.1  
Solyc07g016050.2.1  
Solyc10g044560.1.1  
Solyc11g021160.1.1  
Solyc08g022180.1.1  
Solyc09g059640.1.1  
Solyc05g012040.2.1

BC2 Pi1 BC3 BCm2 ONm3 BCm3 Pi3 ONm1 ONm2 Pi2 BC1 BCm1 Pim1 ON2 ON1 ON3 Pim3 Pim2

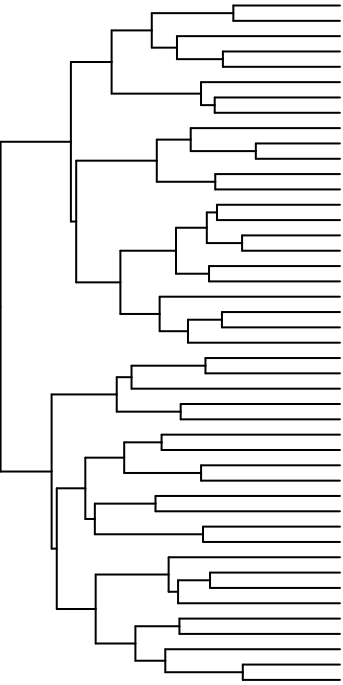

### Color Key

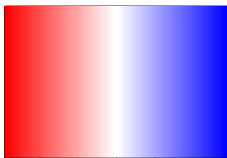

-2 0 1 2  
Value

### Pattern193 2 genes

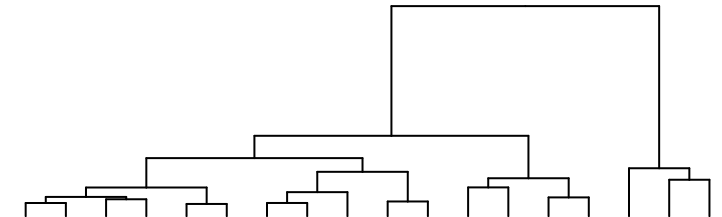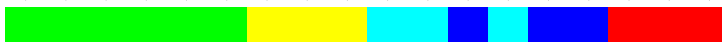

- Solyc12g088700.1.1
- Solyc11g073120.1.1
- Solyc05g026100.1.1
- Solyc05g055460.1.1
- Solyc02g078810.2.1
- Solyc07g051940.2.1
- Solyc12g014350.1.1
- Solyc07g054830.2.1
- Solyc12g007050.1.1
- Solyc02g090110.2.1
- Solyc10g076480.1.1
- Solyc03g044180.1.1
- Solyc01g086730.2.1
- Solyc10g079810.1.1
- Solyc10g083290.1.1
- Solyc09g005560.2.1
- Solyc04g081510.2.1
- Solyc12g011160.1.1
- Solyc12g100250.1.1
- Solyc04g016000.2.1
- Solyc05g008220.2.1
- Solyc05g054650.1.1
- Solyc04g054260.2.1
- Solyc03g082520.1.1
- Solyc08g067610.2.1
- Solyc02g031990.1.1
- Solyc05g007110.2.1
- Solyc07g008620.2.1
- Solyc02g082910.2.1
- Solyc03g119660.1.1
- Solyc06g051090.1.1
- Solyc11g073080.1.1
- Solyc05g008820.2.1
- Solyc04g071600.2.1
- Solyc04g071590.1.1
- Solyc11g007390.1.1
- Solyc08g074960.2.1
- Solyc01g073880.2.1
- Solyc05g055660.1.1
- Solyc06g076350.2.1
- Solyc02g094090.2.1

ONm1 ONm2 ONm3 ON3 ON1 ON2 BCm3 BCm2 BCm1 Pi2 Pi1 Pim1 Pi3 Pim3 Pim2 BC1 BC2 BC3

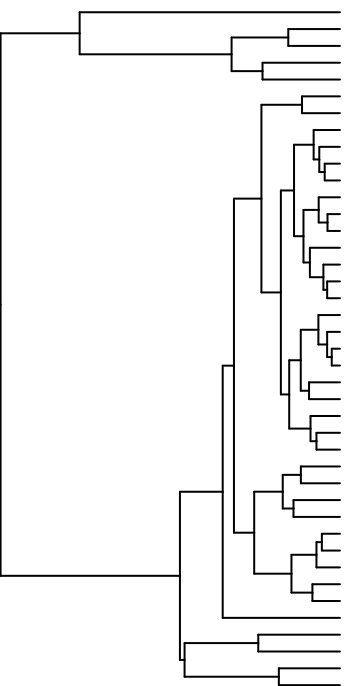

### Color Key

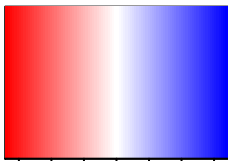

-3    -1    1    3  
Value

### Pattern145 2 genes

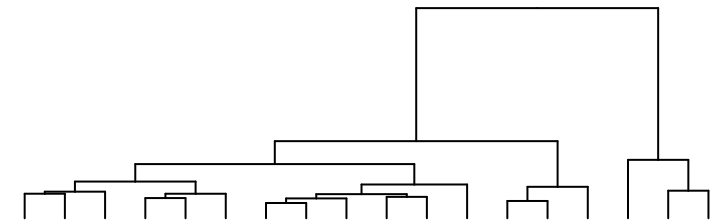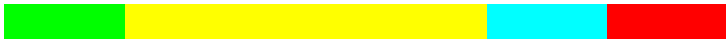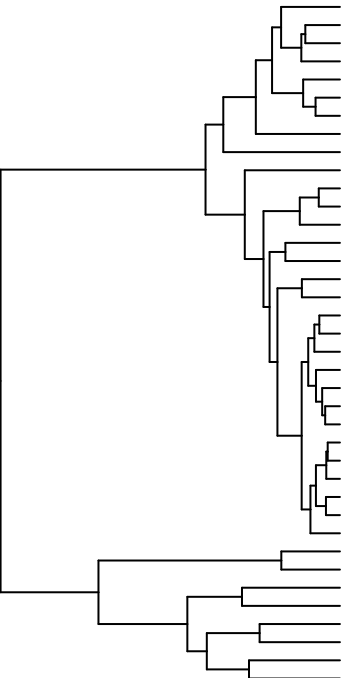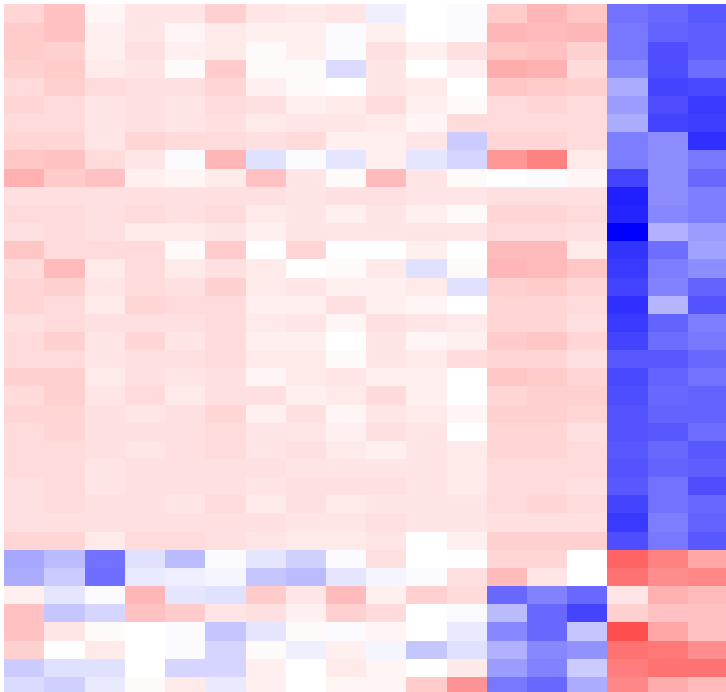

ONm2  
ONm1  
ONm3  
ON1  
BCm3  
Pi3  
BCm2  
ON2  
Pi1  
ON3  
Pi2  
BCm1  
Pim2  
Pim3  
Pim1  
BC1  
BC2  
BC3

Solyc05g014120.1.1  
Solyc03g034430.1.1  
Solyc05g054640.2.1  
Solyc03g063600.2.1  
Solyc02g085830.2.1  
Solyc05g044490.2.1  
Solyc07g063710.1.1  
Solyc08g006470.2.1  
Solyc09g091250.2.1  
Solyc02g081610.1.1  
Solyc12g099730.1.1  
Solyc08g066020.1.1  
Solyc05g052660.1.1  
Solyc04g015140.1.1  
Solyc01g057460.2.1  
Solyc06g071060.1.1  
Solyc02g079180.1.1  
Solyc01g010430.2.1  
Solyc06g076100.2.1  
Solyc01g104770.2.1  
Solyc05g012890.1.1  
Solyc08g080680.2.1  
Solyc11g062400.1.1  
Solyc12g007030.1.1  
Solyc01g105620.2.1  
Solyc06g005520.2.1  
Solyc08g067390.2.1  
Solyc03g117980.2.1  
Solyc10g083690.2.1  
Solyc01g103650.2.1  
Solyc12g099160.1.1  
Solyc03g044160.1.1  
Solyc09g005320.2.1  
Solyc03g044840.1.1  
Solyc03g098460.2.1  
Solyc04g064790.2.1  
Solyc04g015330.2.1  
Solyc01g108340.2.1

### Color Key

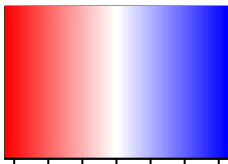

-3 -1 1 2 3  
Value

### Pattern148 2 genes

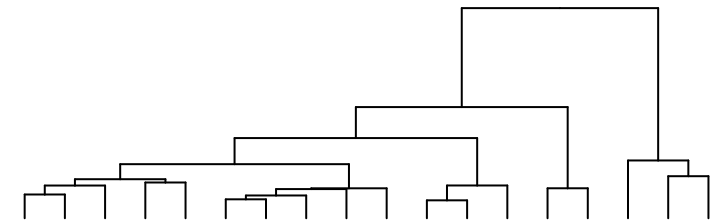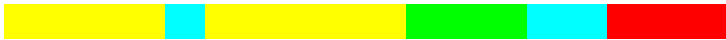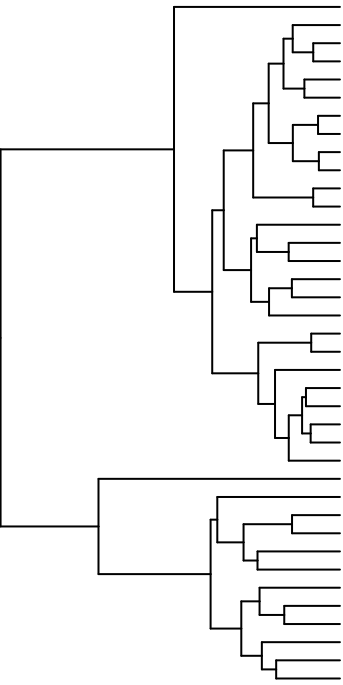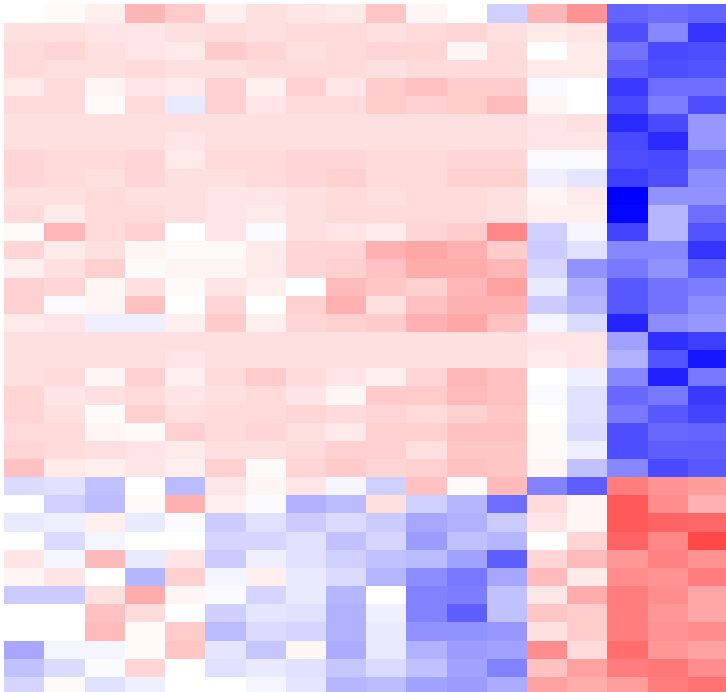

Pim3 Pim2 BCm1 Pim1 Pi3 BCm2 ON2 BCm3 ON1 ON3 ONm3 ONm1 ONm2 Pi2 Pi1 BC1 BC3 BC2

Solyc12g006670.1.1  
Solyc08g013960.1.1  
Solyc11g069640.1.1  
Solyc03g119240.2.1  
Solyc02g065650.1.1  
Solyc03g118670.2.1  
Solyc03g111300.1.1  
Solyc07g008120.2.1  
Solyc03g116700.2.1  
Solyc08g021880.1.1  
Solyc01g108350.2.1  
Solyc06g068530.1.1  
Solyc02g087720.1.1  
Solyc03g115140.2.1  
Solyc03g118690.2.1  
Solyc07g056070.1.1  
Solyc05g044620.1.1  
Solyc10g054570.1.1  
Solyc03g098670.1.1  
Solyc05g053610.2.1  
Solyc03g033990.1.1  
Solyc11g007080.1.1  
Solyc04g016270.1.1  
Solyc02g090740.2.1  
Solyc03g097680.2.1  
Solyc04g054150.1.1  
Solyc05g010770.2.1  
Solyc01g091790.2.1  
Solyc12g017410.1.1  
Solyc11g072460.1.1  
Solyc09g074840.2.1  
Solyc06g074120.2.1  
Solyc01g108040.1.1  
Solyc07g018340.2.1  
Solyc06g082810.2.1  
Solyc07g017250.2.1  
Solyc11g062430.1.1  
Solyc12g100200.1.1



### Color Key

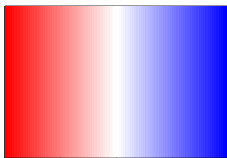

-2 0 2  
Value

### Pattern116 2 genes

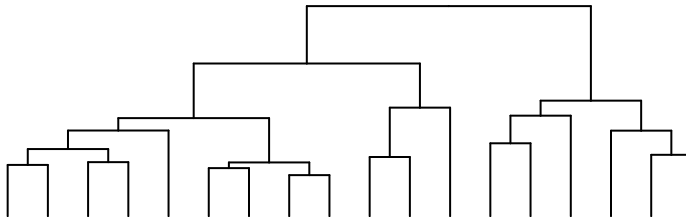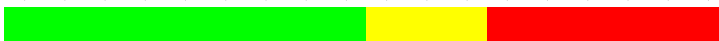

- Solyc02g070400.2.1
- Solyc06g005150.2.1
- Solyc10g006480.1.1
- Solyc11g010390.1.1
- Solyc01g091690.2.1
- Solyc09g074490.2.1
- Solyc06g048870.1.1
- Solyc08g075400.2.1
- Solyc10g047300.1.1
- Solyc05g050380.2.1
- Solyc01g010060.2.1
- Solyc10g079430.1.1
- Solyc10g079930.1.1
- Solyc08g061250.2.1
- Solyc04g080840.1.1
- Solyc03g025490.2.1
- Solyc02g080050.1.1
- Solyc10g083970.1.1
- Solyc06g008950.1.1
- Solyc10g081320.1.1
- Solyc10g079100.1.1
- Solyc08g068480.1.1
- Solyc07g064280.2.1
- Solyc06g084260.2.1
- Solyc07g007400.2.1
- Solyc09g075600.1.1
- Solyc08g068080.2.1
- Solyc08g005720.2.1
- Solyc09g089700.2.1
- Solyc02g081720.2.1
- Solyc11g008300.1.1
- Solyc01g005790.1.1
- Solyc04g050310.2.1
- Solyc03g114790.2.1
- Solyc07g063310.2.1

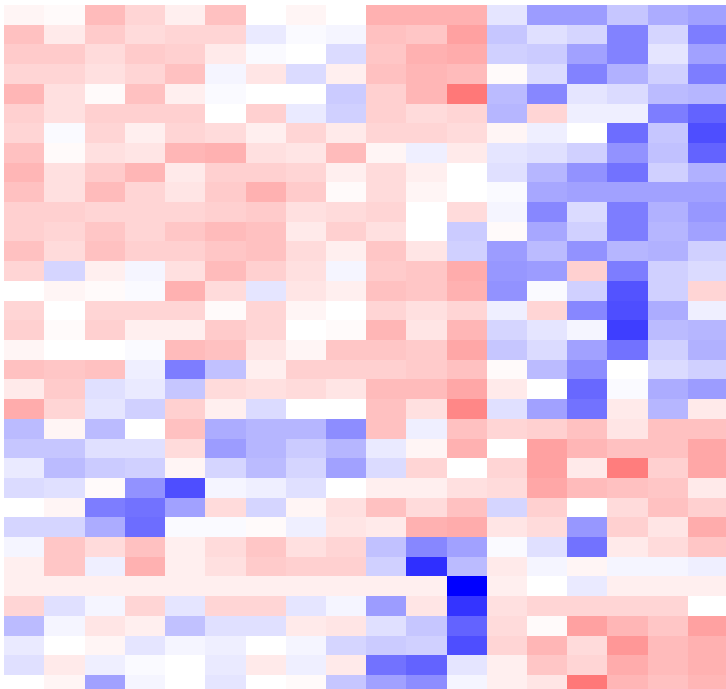

- ONm1
- ON2
- ON1
- ONm2
- Pim1
- ON3
- Pim3
- Pim2
- ONm3
- BCm3
- BCm2
- BCm1
- Pi3
- Pi1
- BC1
- BC2
- Pi2
- BC3

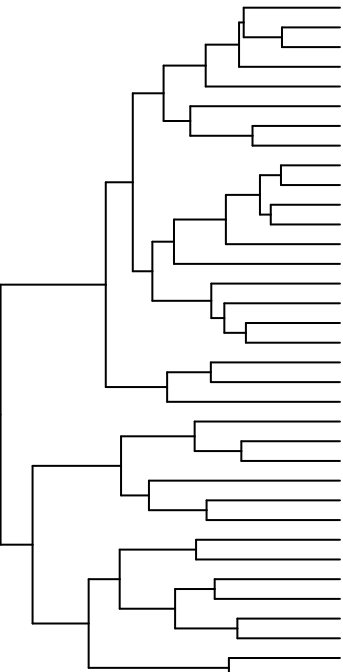

### Color Key

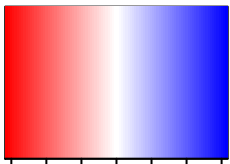

-3 -1 1 2 3  
Value

### Pattern67 2 genes

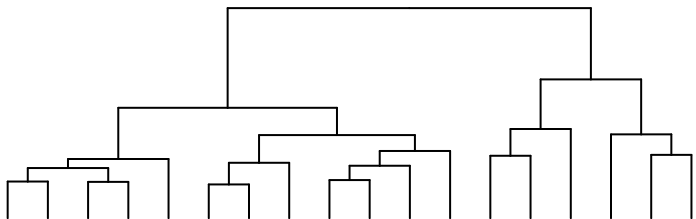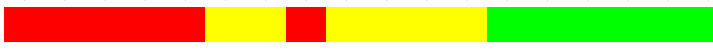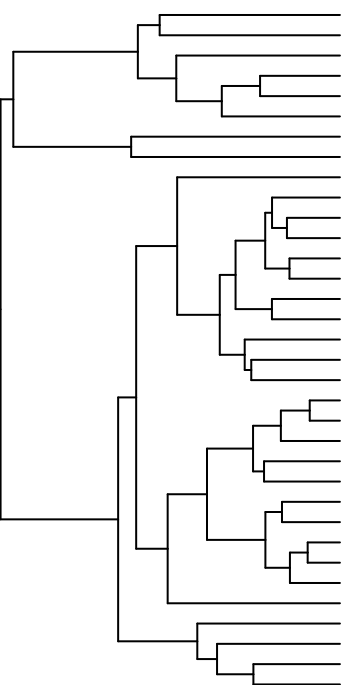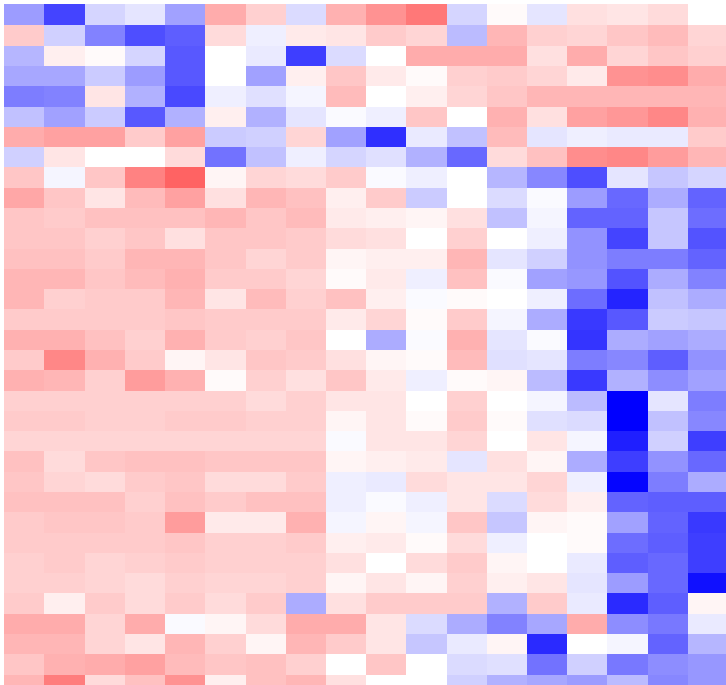

- Solyc07g055650.1.1
- Solyc05g007000.2.1
- Solyc07g006930.1.1
- Solyc09g098030.2.1
- Solyc01g060010.1.1
- Solyc03g115840.2.1
- Solyc09g082190.1.1
- Solyc01g098930.2.1
- Solyc02g091320.2.1
- Solyc05g006010.2.1
- Solyc12g010820.1.1
- Solyc07g052620.1.1
- Solyc05g012210.2.1
- Solyc06g060910.1.1
- Solyc01g105750.1.1
- Solyc10g078770.1.1
- Solyc06g061100.2.1
- Solyc11g008020.1.1
- Solyc02g078940.2.1
- Solyc01g112230.2.1
- Solyc03g116390.2.1
- Solyc07g008390.1.1
- Solyc07g053360.2.1
- Solyc07g053750.1.1
- Solyc10g081800.1.1
- Solyc06g050710.2.1
- Solyc04g081890.1.1
- Solyc09g005610.2.1
- Solyc03g097580.2.1
- Solyc12g039100.1.1
- Solyc04g051720.2.1
- Solyc07g032730.2.1
- Solyc10g082050.1.1
- Solyc05g007570.2.1

ON3 BC1 ON2 BC2 BC3 BCm3 ONm3 ON1 ONm1 BCm2 ONm2 BCm1 Pi2 Pi1 Pim1 Pi3 Pim2 Pim3

### Color Key

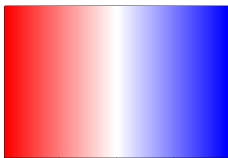

-2 0 2  
Value

### Pattern64 2 genes

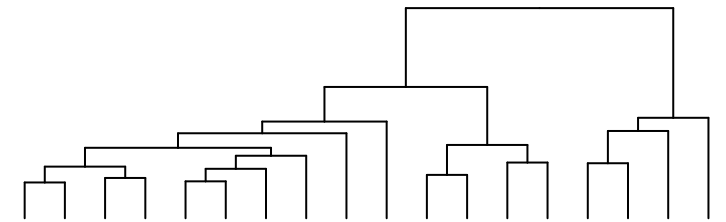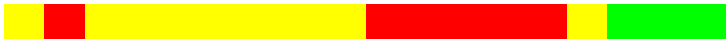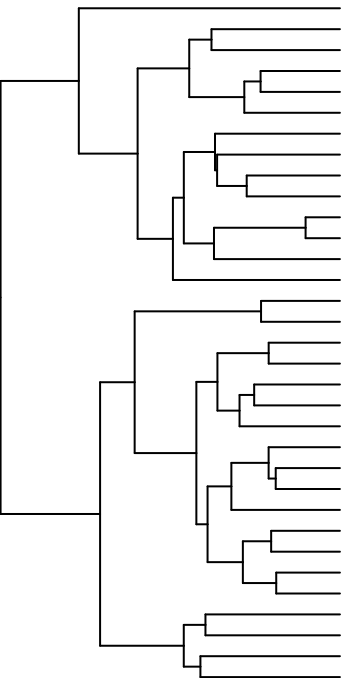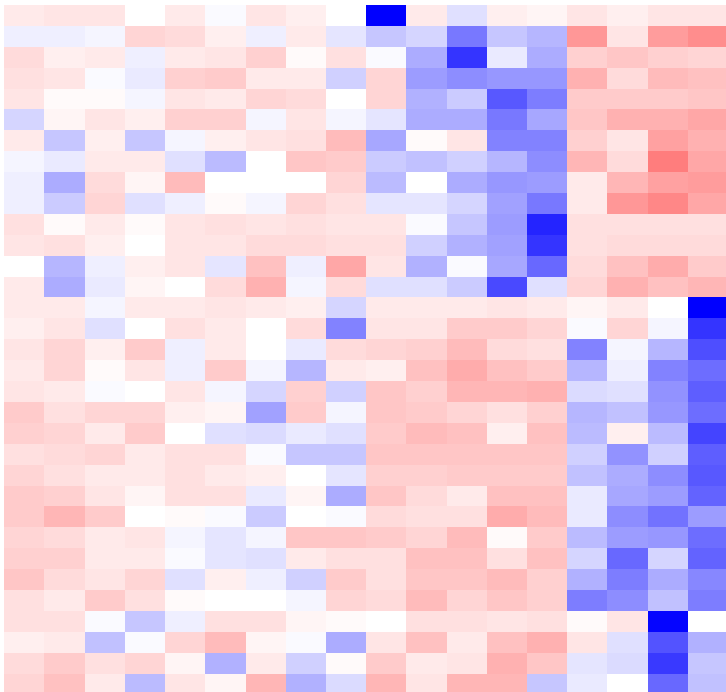

BCm3 ON2 Pi2 ONm3 BCm2 Pi1 ONm2 ONm1 BCm1 ON1 ON3 BC1 BC2 BC3 Pi3 Pim1 Pim2 Pim3

NCRNA\_10\_332  
Solyc08g074660.1.1  
Solyc04g015820.1.1  
Solyc03g096770.1.1  
Solyc10g083700.2.1  
Solyc03g120930.1.1  
Solyc01g091340.2.1  
Solyc05g052850.2.1  
Solyc06g052050.2.1  
Solyc11g066650.1.1  
Solyc07g052140.2.1  
Solyc10g055820.1.1  
Solyc04g055050.1.1  
NCRNA\_4\_282  
Solyc06g069730.2.1  
Solyc03g097760.2.1  
Solyc09g074910.1.1  
Solyc10g007100.2.1  
Solyc07g008200.2.1  
Solyc01g094140.2.1  
Solyc01g104750.2.1  
Solyc01g095450.2.1  
Solyc01g091870.2.1  
Solyc02g072540.2.1  
Solyc04g072440.2.1  
Solyc06g084170.2.1  
Solyc06g066510.1.1  
Solyc08g081740.2.1  
Solyc06g084330.2.1  
Solyc04g015610.2.1  
Solyc02g063380.1.1  
Solyc04g079780.2.1  
Solyc02g064970.2.1

### Color Key



-2 0 2  
Value

### Pattern7 2 genes

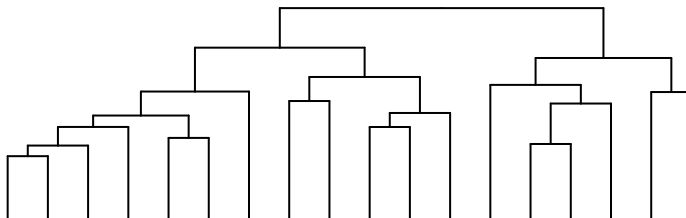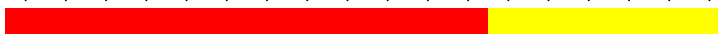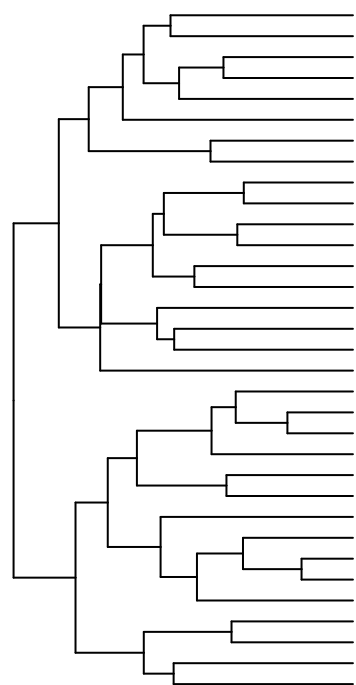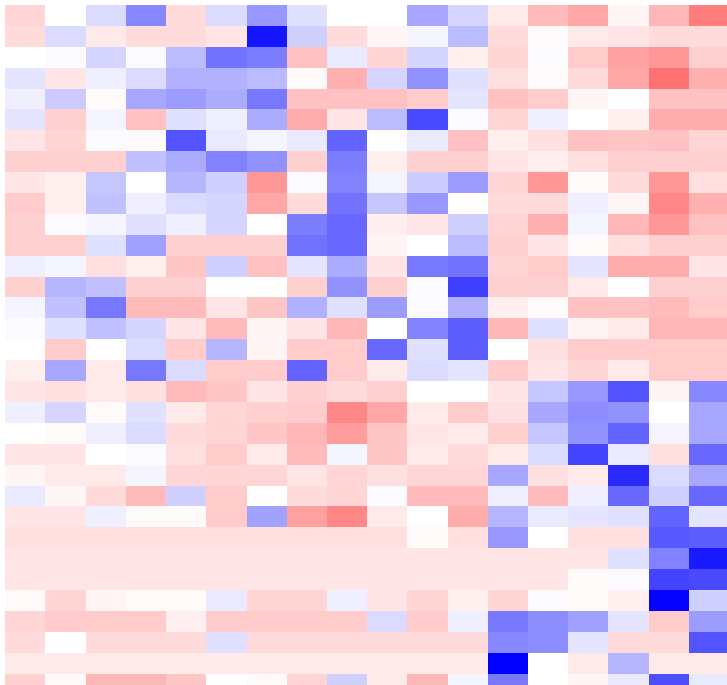

Solyc08g007170.1.1  
Solyc12g016120.1.1  
Solyc04g082870.1.1  
Solyc02g062630.1.1  
Solyc09g082290.2.1  
Solyc11g012490.1.1  
Solyc05g011900.1.1  
Solyc06g051700.1.1  
Solyc04g057850.1.1  
Solyc08g022090.1.1  
Solyc12g036710.1.1  
Solyc10g052430.1.1  
Solyc10g074530.1.1  
Solyc12g017820.1.1  
Solyc06g008590.2.1  
Solyc01g010630.1.1  
Solyc04g014580.1.1  
Solyc05g014910.1.1  
Solyc09g083060.2.1  
Solyc12g005610.1.1  
Solyc10g076550.1.1  
Solyc02g037540.1.1  
Solyc04g005400.1.1  
Solyc04g015890.1.1  
Solyc02g089160.2.1  
Solyc06g051710.1.1  
Solyc12g094530.1.1  
Solyc04g053000.1.1  
Solyc02g083930.1.1  
Solyc06g083910.2.1  
Solyc09g061660.1.1  
Solyc03g098260.1.1  
Solyc11g071410.1.1

ON2 Pim2 BCm2 Pim1 ON1 BCm3 BC3 BCm1 BC1 Pim3 BC2 ON3 ONm1 Pi3 ONm3 Pi1 ONm2 Pi2

### Color Key

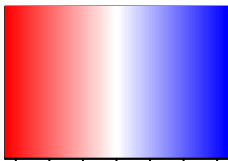

-3 -1 1 2 3  
Value

### Pattern84 2 genes

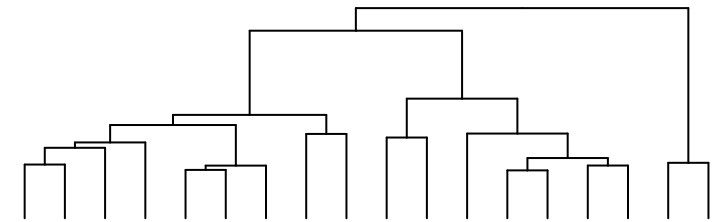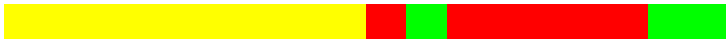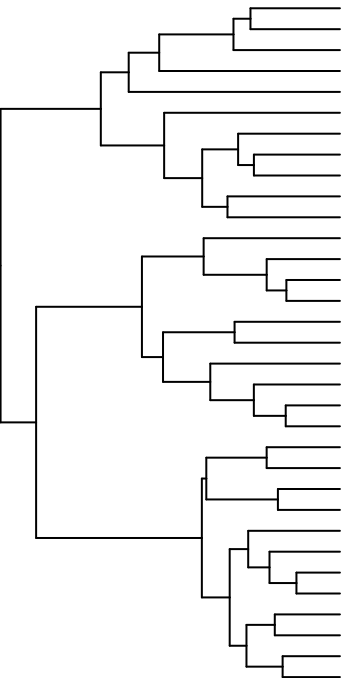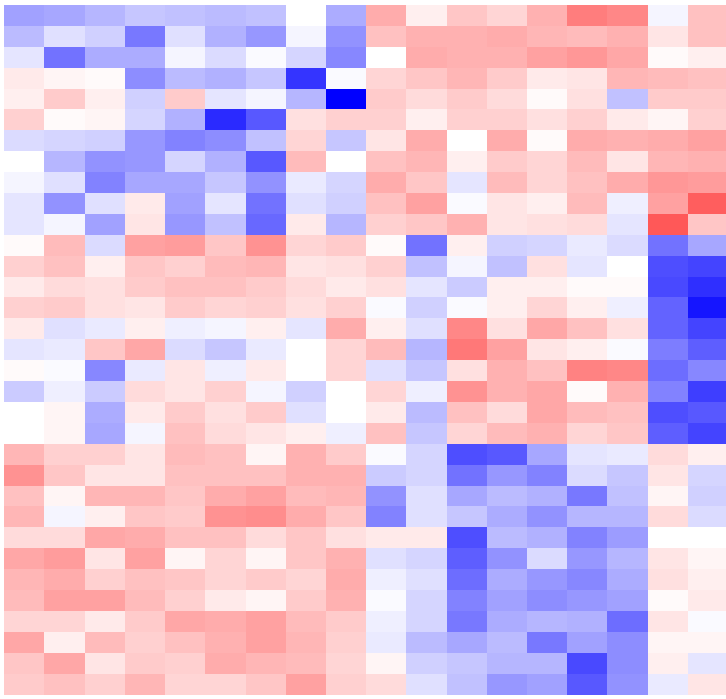

ON2 BCm1 ONm3 ON3 ONm1 BCm3 ON1 BCm2 ONm2 Pim1 Pi3 BC1 Pim2 Pim3 BC2 BC3 Pi2 Pi1

Solyc07g052340.2.1  
Solyc02g079870.2.1  
Solyc06g059870.1.1  
Solyc05g051880.2.1  
Solyc09g091630.1.1  
Solyc12g040860.1.1  
Solyc09g090320.1.1  
Solyc01g106540.2.1  
Solyc01g068280.2.1  
Solyc02g082840.2.1  
Solyc02g070300.2.1  
Solyc03g044010.2.1  
Solyc11g010670.1.1  
Solyc03g033800.1.1  
Solyc09g011260.1.1  
Solyc01g098710.2.1  
NCRNA\_3\_221  
Solyc01g109570.2.1  
Solyc11g017270.1.1  
Solyc06g071280.2.1  
Solyc08g062330.2.1  
Solyc07g052910.2.1  
Solyc02g076870.2.1  
Solyc12g006930.1.1  
Solyc09g065900.2.1  
Solyc07g066100.2.1  
Solyc08g014420.2.1  
Solyc07g065080.2.1  
Solyc12g056440.1.1  
Solyc06g071920.2.1  
Solyc09g065020.2.1  
Solyc07g043590.2.1  
Solyc06g071380.2.1

### Color Key

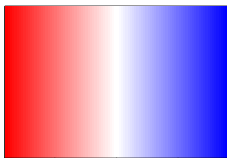

-2 0 2  
Value

### Pattern38 2 genes

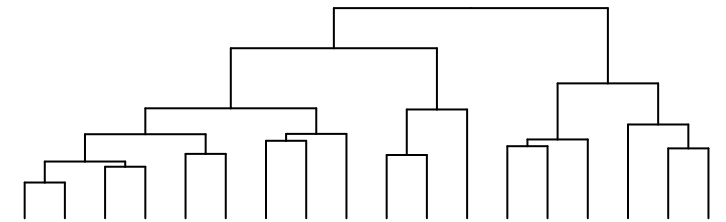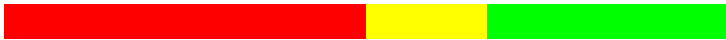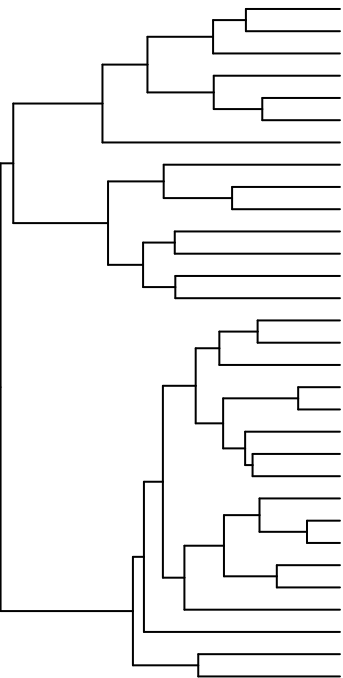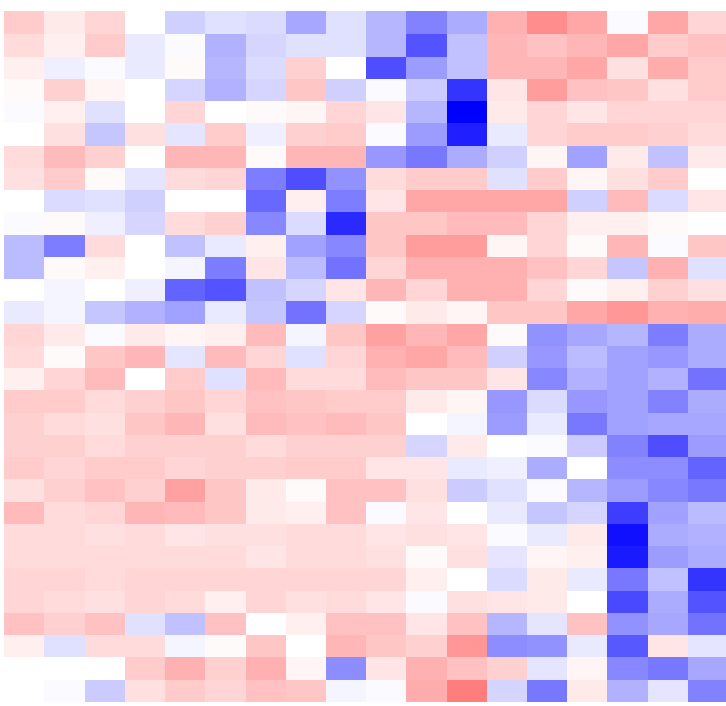

BC2 ON2 BCm2 BCm3 BC1 ON1 ON3 BCm1 BC3 ONm3 ONm1 ONm2 Pim1 Pi2 Pi1 Pim3 Pim2 Pi3

Solyc03g007140.2.1  
Solyc11g071850.1.1  
Solyc04g051490.2.1  
Solyc03g115260.1.1  
Solyc02g030660.1.1  
Solyc02g062590.2.1  
Solyc04g073980.2.1  
Solyc10g039220.1.1  
NCRNA\_2\_184  
Solyc12g099220.1.1  
NCRNA\_4\_267  
Solyc09g050030.1.1  
Solyc02g084180.1.1  
Solyc02g090390.2.1  
Solyc01g100420.2.1  
Solyc03g115560.2.1  
Solyc12g007320.1.1  
Solyc01g094250.2.1  
Solyc07g056570.1.1  
Solyc07g009260.2.1  
Solyc08g067510.1.1  
Solyc01g079170.2.1  
Solyc04g008950.2.1  
Solyc10g008040.2.1  
Solyc02g086650.2.1  
Solyc03g116400.2.1  
Solyc02g091130.2.1  
Solyc11g021020.1.1  
Solyc08g036630.1.1  
Solyc03g119260.2.1  
Solyc03g116430.1.1

### Color Key

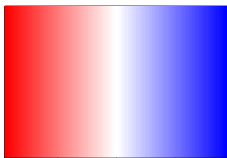

-2 0 2  
Value

### Pattern44 2 genes

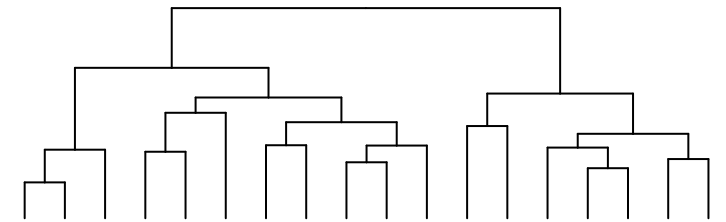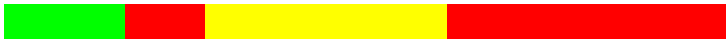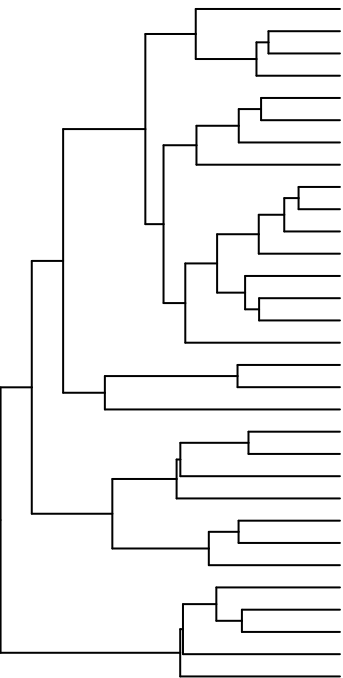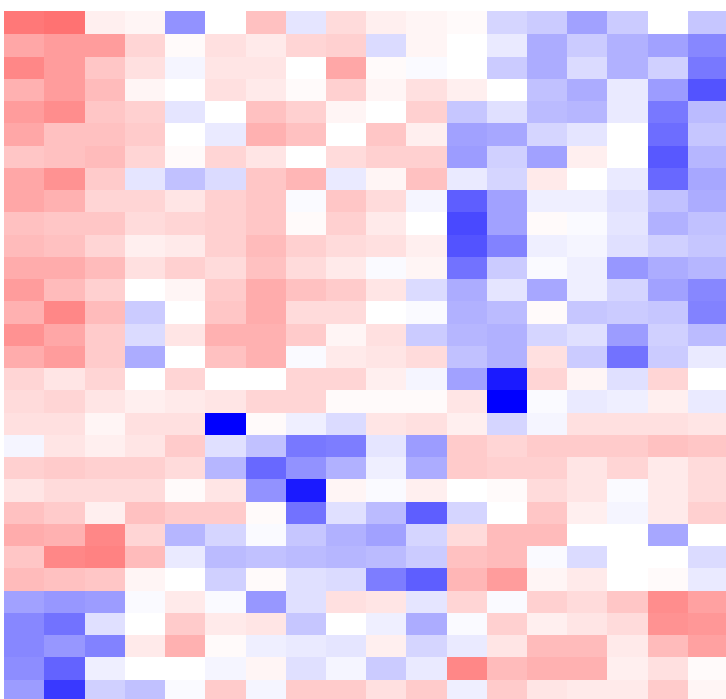

Pim3 Pim2 Pim1 Pi3 BCm3 ON1 ONm1 ON3 ONm2 ON2 ONm3 BC1 BCm1 Pi1 BCm2 Pi2 BC3 BC2

Solyc09g007080.2.1  
Solyc04g074570.1.1  
Solyc12g013750.1.1  
Solyc09g005760.2.1  
Solyc04g076560.2.1  
Solyc02g070690.1.1  
Solyc01g086660.2.1  
Solyc06g066020.2.1  
Solyc08g078220.2.1  
Solyc12g045030.1.1  
Solyc05g009230.1.1  
Solyc06g066630.1.1  
Solyc06g063210.2.1  
Solyc09g011580.2.1  
Solyc03g112980.1.1  
Solyc01g056350.1.1  
Solyc10g047790.1.1  
Solyc10g008260.1.1  
Solyc09g059140.1.1  
Solyc02g069620.2.1  
Solyc05g053850.2.1  
Solyc06g054100.1.1  
Solyc07g061870.1.1  
Solyc04g039620.2.1  
Solyc07g052430.2.1  
Solyc01g110960.2.1  
Solyc07g017430.2.1  
Solyc06g073350.2.1  
Solyc04g005120.2.1  
Solyc03g031990.2.1  
Solyc04g056380.2.1

### Color Key

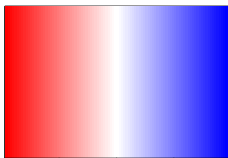

-2 0 2  
Value

### Pattern58 2 genes

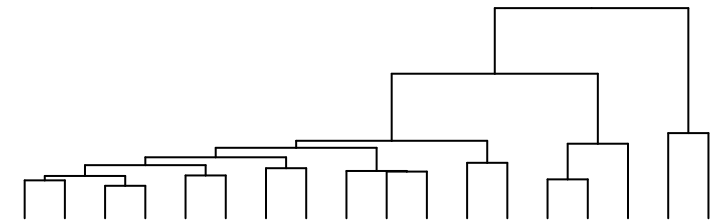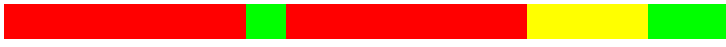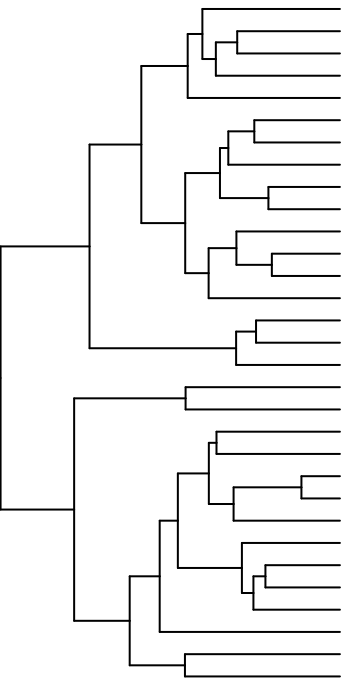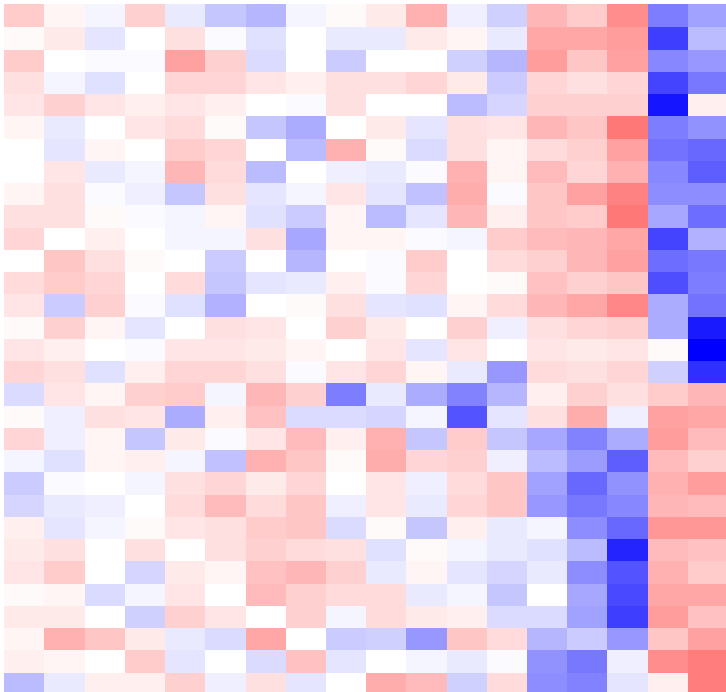

ON2 BC3 ONm3 P12 ON1 ONm1 P1m1 P13 P11 ONm2 BC2 BC1 ON3 BCm3 BCm2 BCm1 P1m3 P1m2

Solyc03g096950.2.1  
Solyc10g079200.1.1  
Solyc05g007880.2.1  
Solyc02g078110.1.1  
Solyc05g008880.1.1  
Solyc11g013180.1.1  
Solyc03g113510.1.1  
Solyc10g085830.1.1  
Solyc11g012410.1.1  
Solyc01g081450.2.1  
Solyc02g082100.2.1  
Solyc11g040330.1.1  
Solyc03g123400.1.1  
Solyc12g009570.1.1  
Solyc12g014590.1.1  
Solyc01g106460.2.1  
Solyc09g097760.2.1  
Solyc09g074780.2.1  
Solyc01g081620.2.1  
Solyc10g050520.1.1  
Solyc10g047260.1.1  
Solyc04g007150.2.1  
Solyc04g007160.1.1  
Solyc07g063270.2.1  
Solyc12g006590.1.1  
Solyc11g013330.1.1  
Solyc03g120880.2.1  
Solyc02g085580.2.1  
Solyc09g065710.1.1  
Solyc01g086870.2.1  
Solyc07g042740.2.1



### Color Key

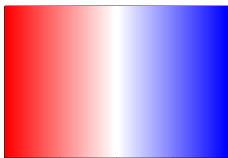

-2 0 2  
Value

### Pattern62 2 genes

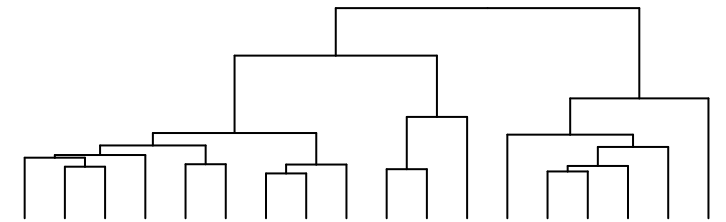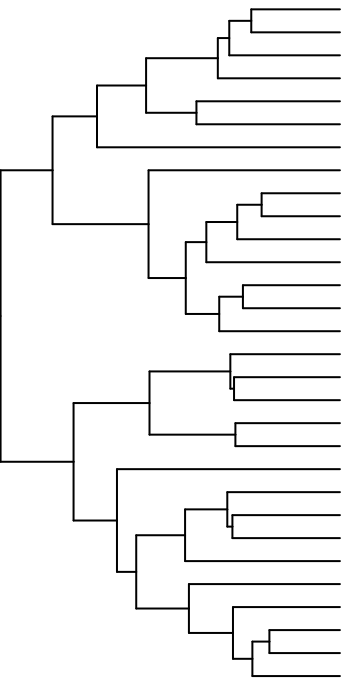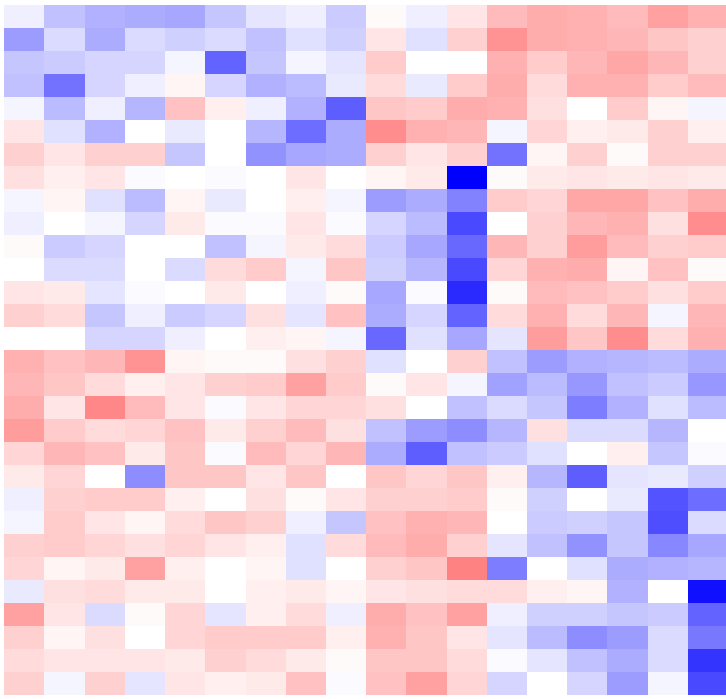

BC3  
ONm3  
ON3  
BC1  
ONm1  
ON1  
ON2  
BC2  
ONm2  
BCm2  
BCm3  
BCm1  
Pim1  
Pi2  
Pim2  
Pi3  
Pi1  
Pim3

Solyc05g020020.2.1  
Solyc10g008460.2.1  
Solyc03g116500.2.1  
Solyc09g090340.1.1  
Solyc03g078700.2.1  
Solyc05g054480.2.1  
Solyc07g053100.2.1  
Solyc01g066270.2.1  
Solyc02g082060.1.1  
Solyc02g080410.2.1  
Solyc04g049160.2.1  
Solyc12g010250.1.1  
Solyc02g082110.2.1  
NCRNA\_12\_319  
Solyc06g070980.2.1  
Solyc01g107580.2.1  
Solyc09g031790.2.1  
Solyc03g007400.1.1  
Solyc04g016400.2.1  
Solyc02g068250.2.1  
Solyc06g064620.2.1  
Solyc08g067620.2.1  
Solyc11g072890.1.1  
Solyc02g079760.2.1  
Solyc04g077100.2.1  
Solyc08g062450.1.1  
Solyc04g074820.1.1  
Solyc02g032940.2.1  
Solyc09g090570.2.1  
Solyc04g008940.2.1

### Color Key

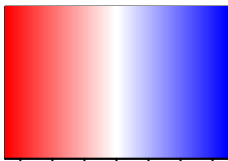

-3   -1   1   3  
Value

### Pattern88 2 genes

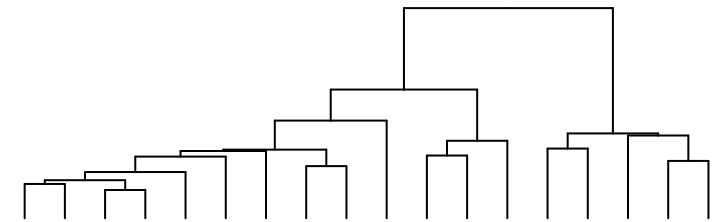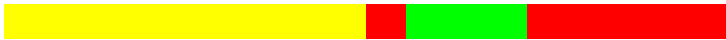

- Solyc10g055610.1.1
- Solyc03g116940.1.1
- Solyc06g062310.2.1
- Solyc06g062880.1.1
- Solyc12g008990.1.1
- Solyc01g094650.2.1
- Solyc01g105520.2.1
- Solyc01g102860.2.1
- Solyc09g014530.2.1
- Solyc06g082220.2.1
- Solyc10g082020.1.1
- Solyc07g054200.2.1
- Solyc03g097020.2.1
- Solyc02g062700.2.1
- Solyc05g013170.2.1
- Solyc08g068630.2.1
- Solyc08g007150.1.1
- Solyc10g005280.1.1
- Solyc11g072740.1.1
- Solyc07g064350.1.1
- Solyc08g077540.1.1
- Solyc12g005530.1.1
- Solyc01g079380.1.1
- Solyc10g055710.1.1
- Solyc12g096230.1.1
- Solyc11g008130.1.1
- Solyc01g087630.1.1
- Solyc03g111860.1.1
- Solyc04g011950.1.1
- Solyc04g080340.2.1

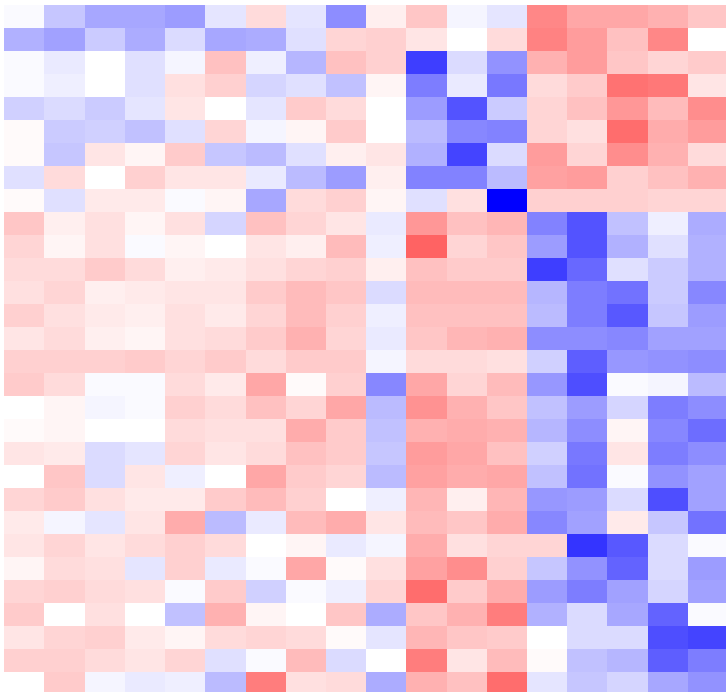

Pim3 BCm3 ON2 BCm2 Pim2 Pim1 ON1 ON3 BCm1 Pi3 ONm2 ONm3 ONm1 BC3 BC2 BC1 Pi2 Pi1

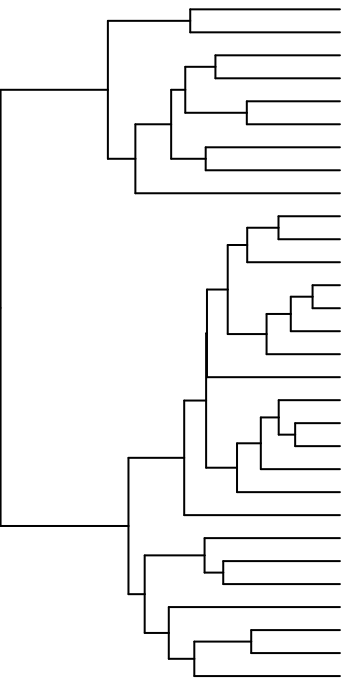

### Color Key

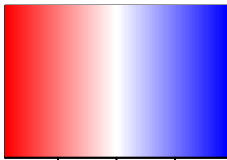

-2 0 2  
Value

### Pattern11 2 genes

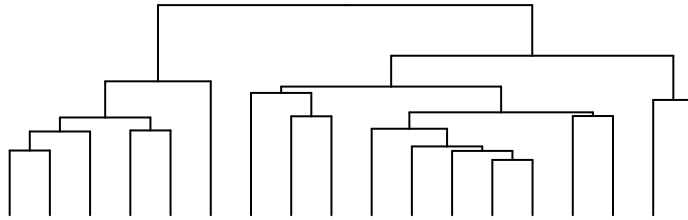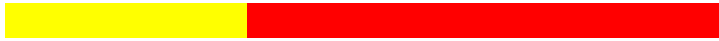

Solyc05g013260.1.1  
Solyc07g032460.1.1  
NCRNA\_11\_149  
Solyc10g008250.1.1  
NCRNA\_4\_275  
Solyc03g019750.2.1  
Solyc03g083220.1.1  
Solyc12g056040.1.1  
Solyc08g005150.2.1  
Solyc02g091930.2.1  
Solyc05g015420.2.1  
Solyc11g065200.1.1  
Solyc08g005640.2.1  
Solyc01g015060.1.1  
Solyc07g054080.1.1  
Solyc11g063630.1.1  
Solyc10g007990.2.1  
Solyc03g063260.2.1  
Solyc11g071610.1.1  
Solyc08g045650.1.1  
Solyc07g063920.2.1  
Solyc06g060950.1.1  
Solyc11g062200.1.1  
NCRNA\_5\_278  
Solyc06g051050.1.1  
Solyc04g039760.1.1  
Solyc07g032420.1.1  
Solyc01g095950.1.1  
Solyc12g011420.1.1

ON2 ON3 P11 P13 ON1 P12 BC3 Pim1 ONm2 ONm3 Pim3 ONm1 Pim2 BCm2 BC2 BCm3 BC1 BCm1

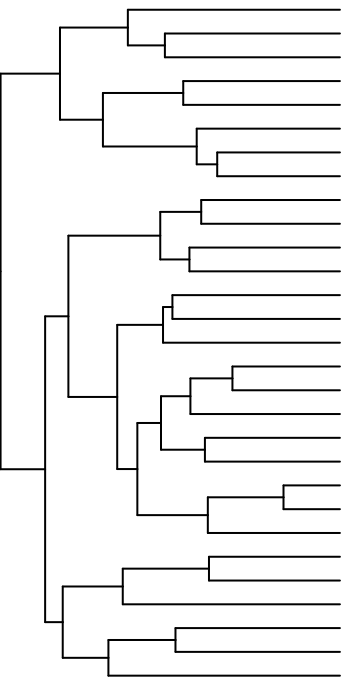

### Color Key

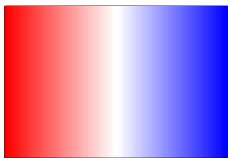

-2 0 2  
Value

### Pattern57 2 genes

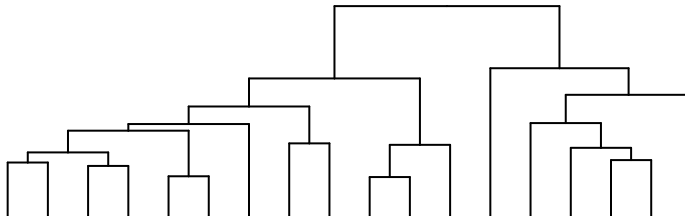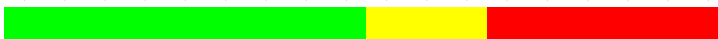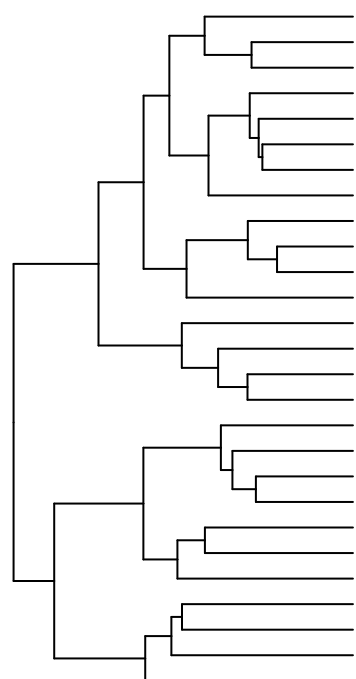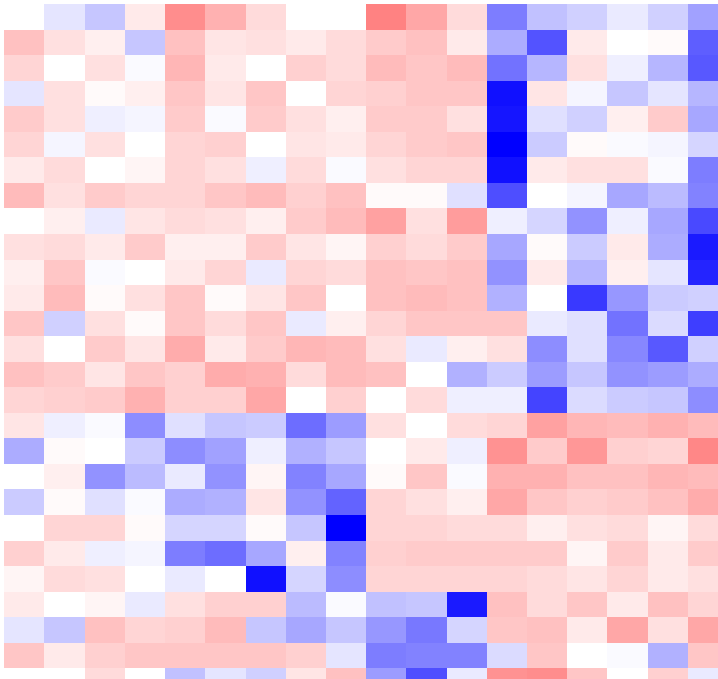

- Solyc05g025610.1.1
- Solyc03g115180.1.1
- Solyc10g047410.1.1
- Solyc02g094040.2.1
- Solyc05g015660.1.1
- Solyc12g033070.1.1
- Solyc01g112130.2.1
- Solyc11g056490.1.1
- Solyc02g062400.2.1
- Solyc11g056670.1.1
- Solyc02g082870.2.1
- Solyc04g054220.2.1
- Solyc01g087480.1.1
- Solyc11g056330.1.1
- Solyc01g007600.2.1
- Solyc08g082240.1.1
- Solyc02g081330.2.1
- Solyc05g016180.2.1
- Solyc01g067620.2.1
- Solyc01g091850.2.1
- Solyc02g086310.1.1
- Solyc06g034040.1.1
- Solyc07g006860.2.1
- Solyc05g052290.1.1
- Solyc10g011990.1.1
- Solyc02g084100.1.1
- Solyc11g012200.1.1

Pl2  
ONm3  
ONm1  
Pl1  
ONm2  
Pim2  
Pim1  
Pim3  
Pl3  
ON2  
ON3  
ON1  
BCm1  
BC3  
BCm2  
BCm3  
BC2  
BC1

### Color Key

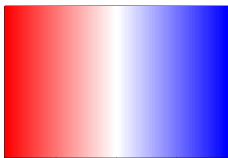

-2 0 2  
Value

### Pattern23 2 genes

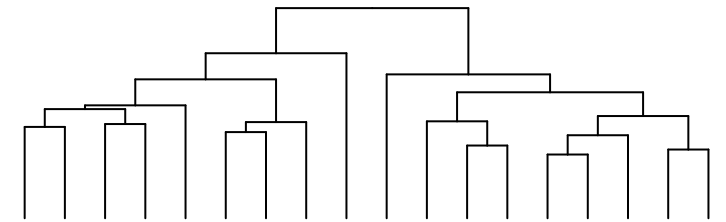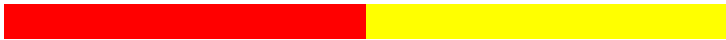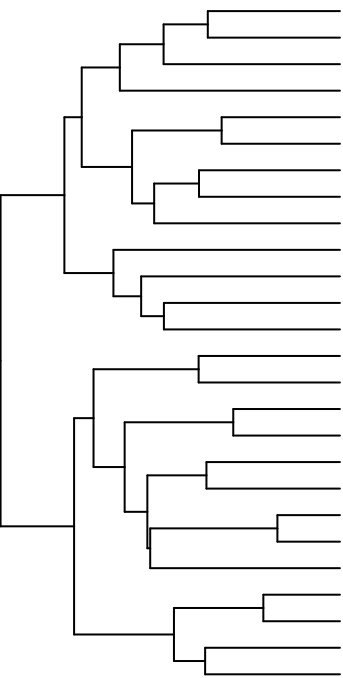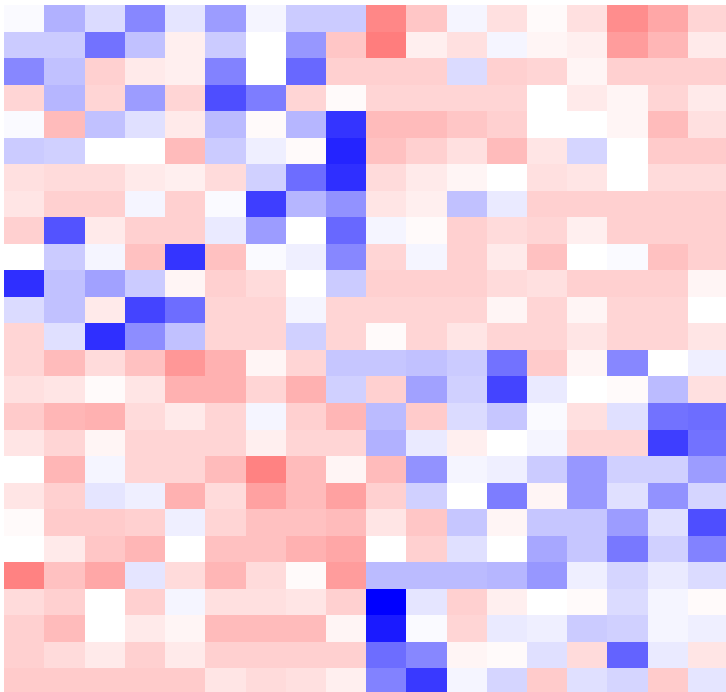

- Solyc11g007120.1.1
- Solyc06g082180.1.1
- Solyc07g006850.1.1
- Solyc05g018190.1.1
- Solyc03g120580.2.1
- Solyc10g054850.1.1
- Solyc03g062670.1.1
- Solyc01g091150.2.1
- TRNA\_11\_35
- Solyc01g066030.1.1
- Solyc06g072090.1.1
- Solyc03g019970.2.1
- Solyc05g055950.1.1
- Solyc06g068390.1.1
- Solyc04g082240.1.1
- Solyc03g079870.1.1
- Solyc07g032390.1.1
- Solyc04g076430.2.1
- Solyc12g088500.1.1
- Solyc08g067340.2.1
- Solyc09g015770.2.1
- Solyc10g024310.1.1
- Solyc10g008780.1.1
- Solyc09g018050.1.1
- Solyc05g015240.1.1
- Solyc03g117830.1.1

ON2 Pim2 ON1 BC3 Pim1 BC2 ON3 Pim3 BC1 BCm1 ONm1 Pi3 BCm3 BCm2 ONm3 Pi2 ONm2 Pi1

### Color Key

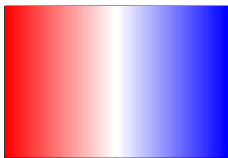

-2 0 2  
Value

### Pattern59 2 genes

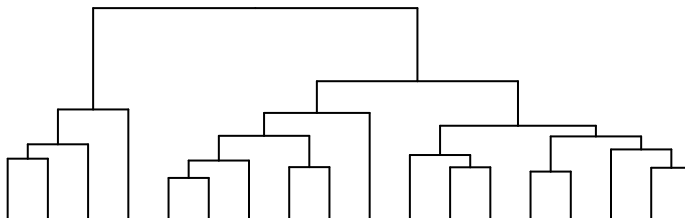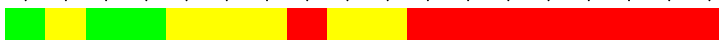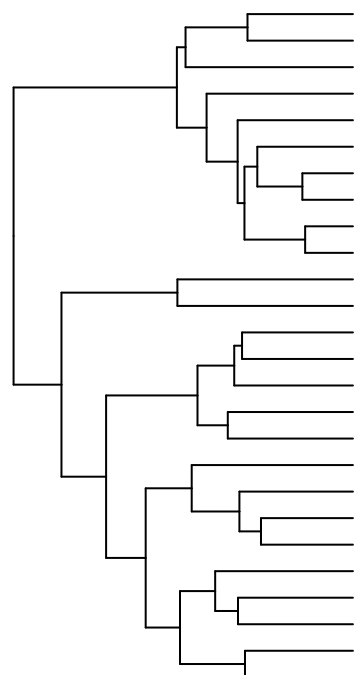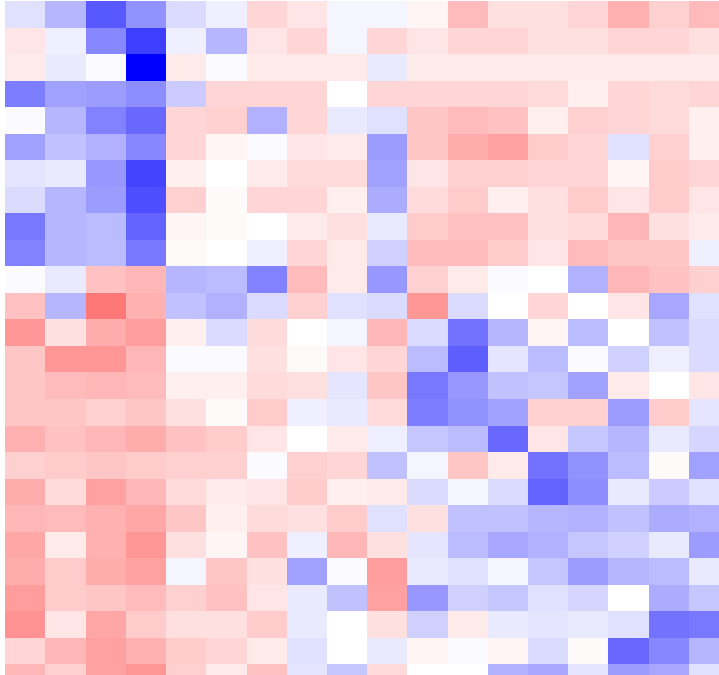

Pim1 Pi3 Pim2 Pim3 BCm2 Pi2 Pi1 ONm1 BCm3 BCm1 ON3 BC3 BC2 ON2 ONm3 BC1 ON1 ONm2

Solyc07g007620.2.1  
Solyc07g053450.2.1  
Solyc02g071000.1.1  
NCRNA\_4\_12  
Solyc01g109470.2.1  
Solyc08g076090.2.1  
Solyc06g060310.2.1  
Solyc07g006700.1.1  
Solyc10g086060.1.1  
Solyc05g013480.2.1  
Solyc05g009480.1.1  
NCRNA\_12\_286  
Solyc10g005520.2.1  
Solyc03g093610.1.1  
Solyc09g008760.1.1  
Solyc11g063600.1.1  
Solyc04g082440.2.1  
Solyc08g067520.1.1  
Solyc10g005360.2.1  
Solyc04g007690.2.1  
Solyc03g031420.1.1  
Solyc08g043170.2.1  
Solyc06g007530.2.1  
Solyc06g051040.2.1  
Solyc01g091360.2.1  
NCRNA\_4\_252

# Color Key

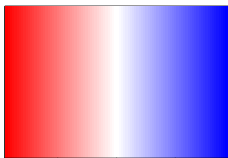

-2 0 2  
Value

# Pattern47 2 genes

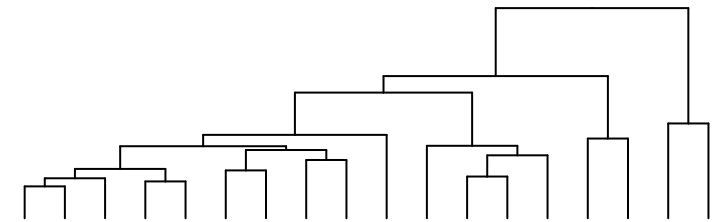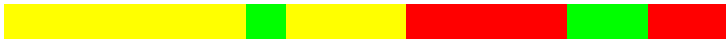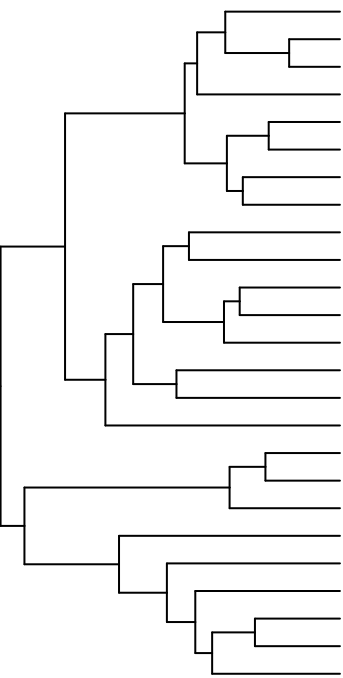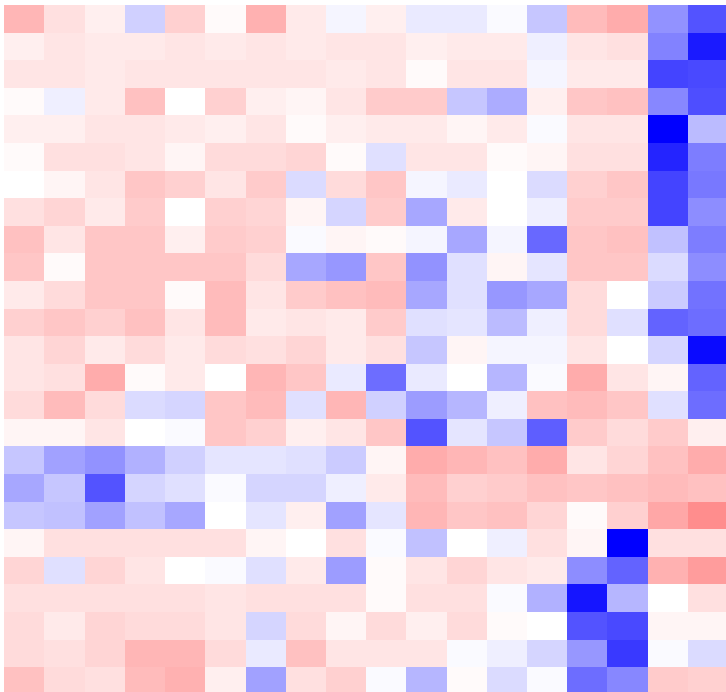

ONm1 Pim2 Pim3 ONm2 ON3 ON2 Pi3 ON1 ONm3 Pim1 BC2 BCm3 BCm2 BC3 Pi1 Pi2 BCm1 BC1

Solyc06g068030.2.1  
Solyc06g071830.2.1  
Solyc02g090540.2.1  
Solyc10g084730.1.1  
Solyc09g010250.1.1  
Solyc10g050510.1.1  
NCRNA\_10\_102  
NCRNA\_6\_6  
Solyc01g011410.1.1  
Solyc10g076630.1.1  
Solyc05g052830.2.1  
Solyc09g098610.1.1  
Solyc04g007300.2.1  
Solyc03g115830.1.1  
Solyc02g011760.1.1  
Solyc07g006980.1.1  
Solyc03g118130.2.1  
Solyc03g097320.2.1  
Solyc07g048080.2.1  
Solyc03g079990.1.1  
Solyc12g005620.1.1  
Solyc11g063520.1.1  
Solyc04g072070.2.1  
Solyc08g082500.1.1  
Solyc04g081580.2.1

### Color Key

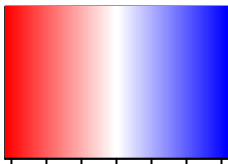

-3 -1 1 2 3  
Value

### Pattern77 2 genes

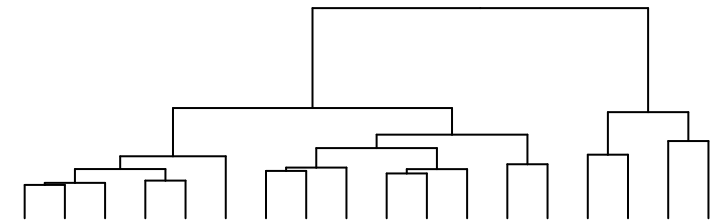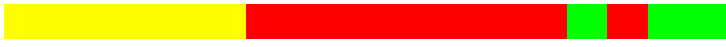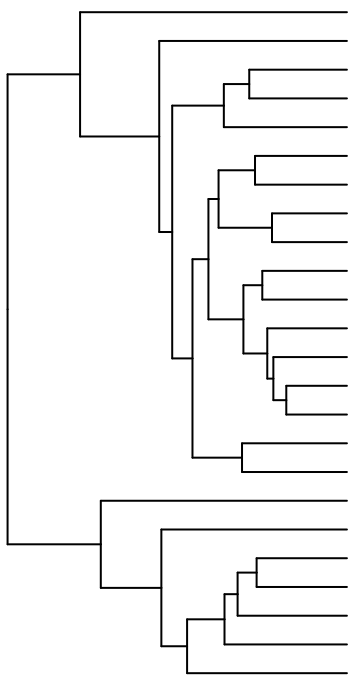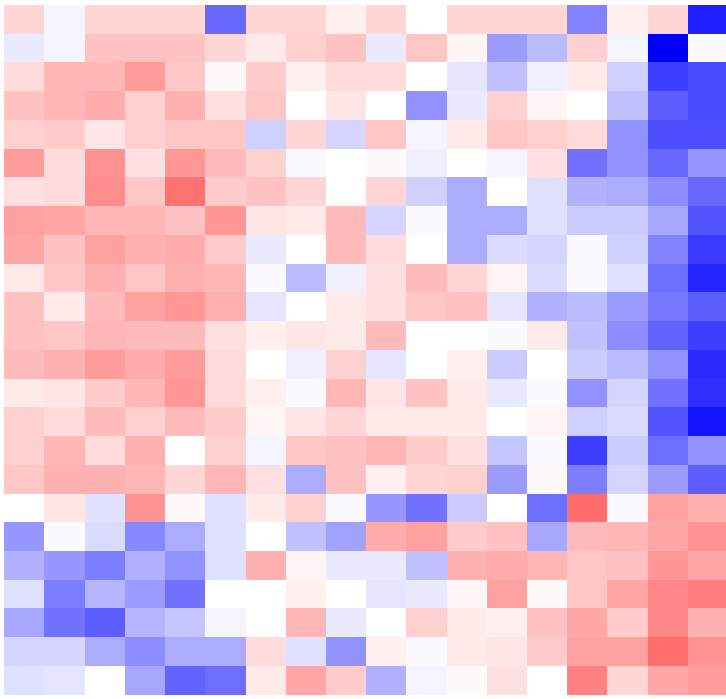

Solyc09g090310.1.1  
Solyc03g093110.2.1  
Solyc04g081460.2.1  
Solyc01g103140.2.1  
Solyc09g008220.2.1  
Solyc04g078840.2.1  
Solyc02g071040.2.1  
Solyc02g084210.1.1  
Solyc05g053210.2.1  
Solyc09g092490.2.1  
Solyc03g118710.2.1  
Solyc05g056480.2.1  
Solyc09g089650.1.1  
Solyc01g111080.2.1  
Solyc08g083190.2.1  
Solyc04g016430.2.1  
Solyc04g009370.2.1  
NCRNA\_10\_278  
Solyc11g005510.1.1  
Solyc03g025440.2.1  
Solyc06g054220.2.1  
Solyc01g005250.2.1  
Solyc07g052570.2.1  
Solyc07g009370.1.1

ON2 BCm2 BCm3 ON3 BCm1 ON1 BC3 Pi1 ONm3 Pi2 BC1 ONm1 ONm2 BC2 Pim1 Pi3 Pim2 Pim3



### Color Key

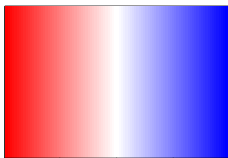

-2 0 2  
Value

### Pattern106 2 genes

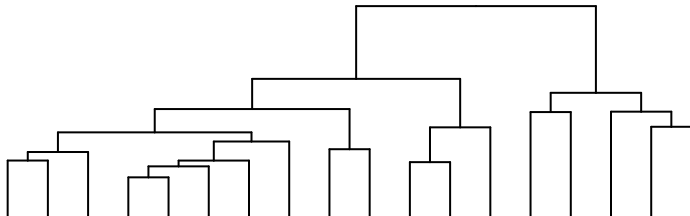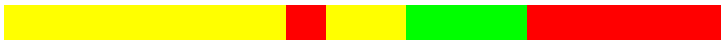

Solyc07g055170.1.1  
Solyc06g084280.1.1  
Solyc01g098520.2.1  
Solyc01g109270.2.1  
Solyc07g017660.1.1  
Solyc04g071550.2.1  
Solyc10g084090.1.1  
Solyc10g079800.1.1  
Solyc02g076910.2.1  
Solyc01g095660.1.1  
Solyc06g067900.1.1  
Solyc05g015130.1.1  
Solyc01g067120.2.1  
Solyc06g063200.1.1  
Solyc08g062360.2.1  
Solyc10g008080.1.1  
Solyc08g066380.1.1  
Solyc08g016610.1.1  
Solyc10g006950.1.1  
Solyc02g069700.1.1  
Solyc02g063250.2.1  
Solyc02g091770.1.1  
Solyc11g019920.1.1

ONm2 Pim1 BCm1 Pim3 BCm2 Pim2 ONm3 Pi3 ONm1 BCm3 ON3 ON2 ON1 BC2 Pi1 BC1 Pi2 BC3

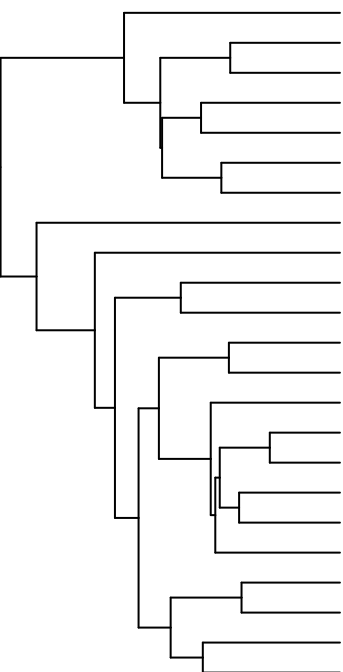

### Color Key

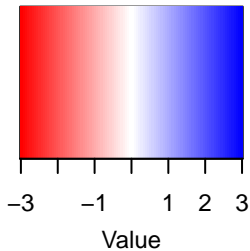

### Pattern120 2 genes

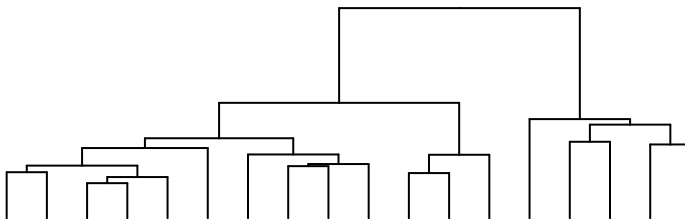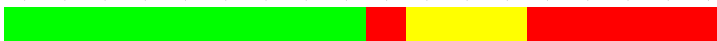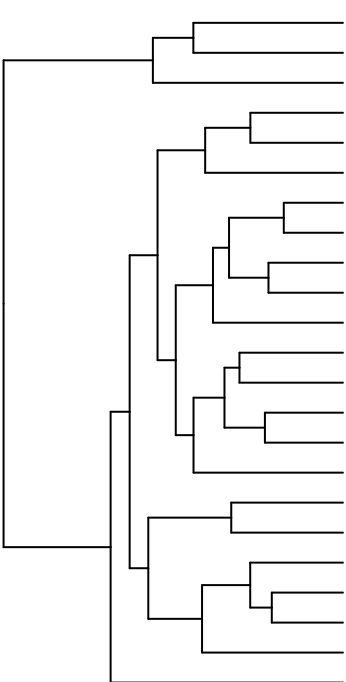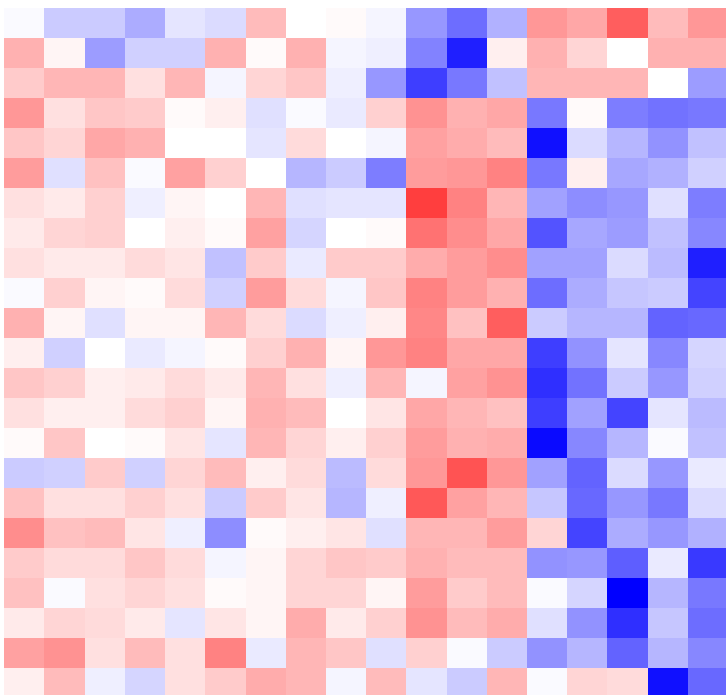

ON1  
ONm3  
ONm2  
ON2  
Pi2  
ONm1  
ON3  
Pi1  
Pi3  
Pim1  
BCm1  
BCm2  
BCm3  
BC1  
Pim3  
BC3  
Pim2  
BC2

Solyc05g009630.2.1  
Solyc12g006100.1.1  
Solyc12g056720.1.1  
Solyc02g086220.2.1  
Solyc01g079410.2.1  
Solyc10g005460.2.1  
Solyc10g081510.1.1  
Solyc02g071120.2.1  
Solyc07g008820.2.1  
Solyc09g008280.1.1  
Solyc01g105290.2.1  
Solyc07g006330.1.1  
Solyc05g053890.1.1  
Solyc01g091330.2.1  
Solyc09g064470.2.1  
Solyc10g006400.2.1  
Solyc08g080170.2.1  
Solyc10g011940.1.1  
Solyc07g006670.1.1  
Solyc02g071090.2.1  
Solyc01g098410.2.1  
Solyc11g071860.1.1  
Solyc08g077630.2.1

### Color Key

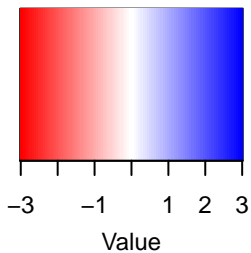

### Pattern190 2 genes

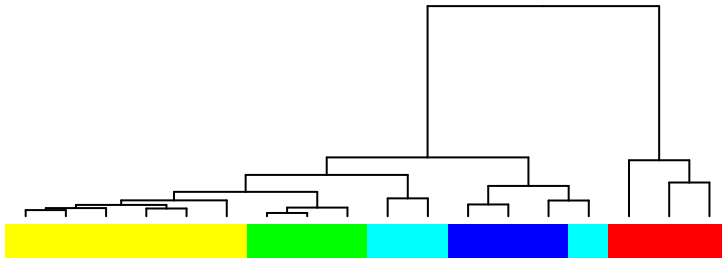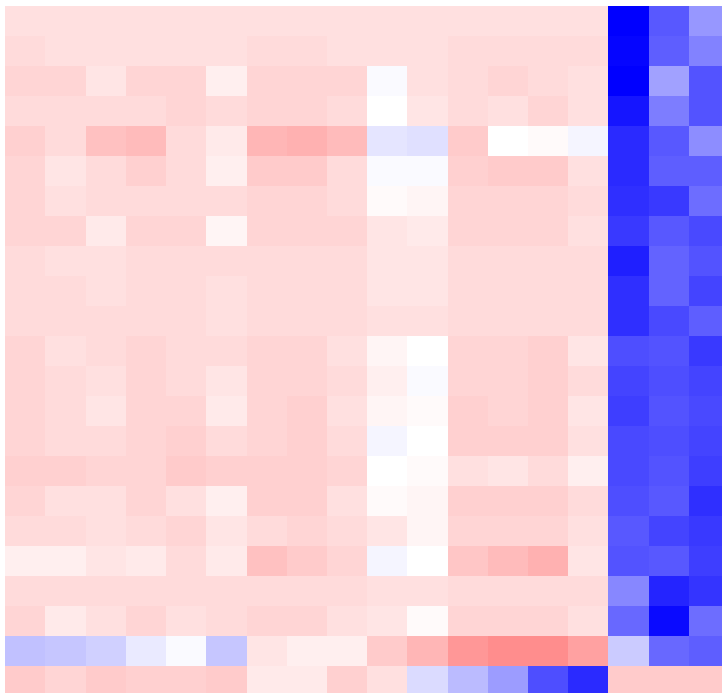

Solyc06g061210.2.1  
Solyc07g052370.2.1  
Solyc10g076680.1.1  
Solyc02g078930.1.1  
Solyc03g098650.2.1  
Solyc08g080130.2.1  
Solyc09g014720.1.1  
Solyc01g080570.2.1  
Solyc05g056080.2.1  
Solyc05g054380.1.1  
Solyc08g059710.2.1  
Solyc12g006840.1.1  
Solyc08g023510.1.1  
Solyc05g015850.2.1  
Solyc05g012180.2.1  
Solyc01g107860.2.1  
Solyc07g043320.2.1  
Solyc10g017570.2.1  
Solyc10g007390.2.1  
Solyc06g065060.1.1  
Solyc04g040130.1.1  
Solyc04g007170.2.1  
Solyc02g085590.2.1

BCm3  
BCm2  
ON2  
ON1  
ON3  
BCm1  
ONm2  
ONm1  
ONm3  
Pi1  
Pi2  
Pim1  
Pim2  
Pim3  
Pi3  
BC1  
BC3  
BC2

# Color Key

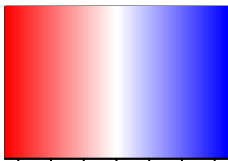

-3   -1   1   3  
Value

# Pattern43 2 genes

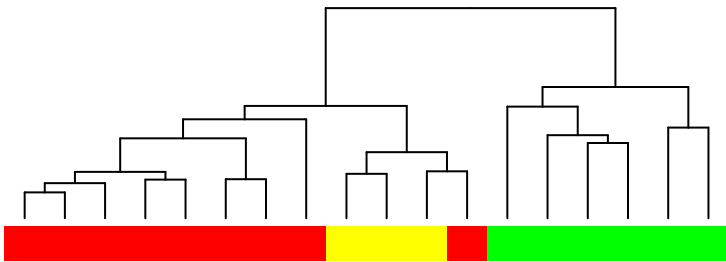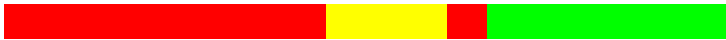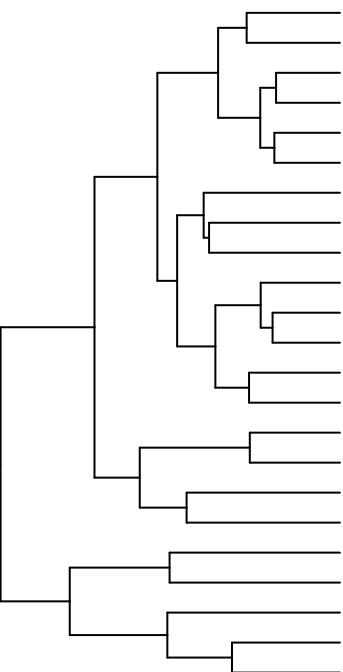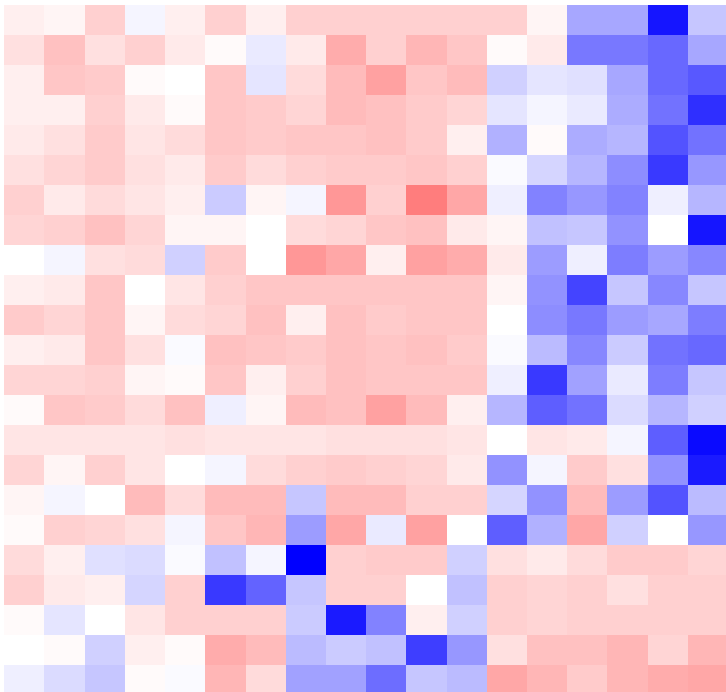

Solyc01g009470.1.1  
Solyc04g082860.1.1  
Solyc09g075270.1.1  
Solyc05g005280.2.1  
Solyc03g007340.2.1  
Solyc06g067980.2.1  
Solyc07g065180.2.1  
Solyc06g064610.1.1  
Solyc05g032680.2.1  
Solyc06g036240.1.1  
Solyc07g055560.2.1  
Solyc02g087890.2.1  
Solyc06g034410.2.1  
Solyc03g095310.2.1  
Solyc09g011160.2.1  
Solyc01g105650.2.1  
Solyc01g097400.1.1  
Solyc10g047900.1.1  
RRNA\_9\_1  
Solyc12g042840.1.1  
Solyc05g051180.1.1  
Solyc01g111590.2.1  
Solyc02g043830.2.1

BCm2   ONm1   BCm3   BC2   ONm2   BCm1   BC1   BC3   ON3   ON1   ON2   ONm3   Pi2   Pi1   Pim1   Pim2   Pi3   Pim3

### Color Key

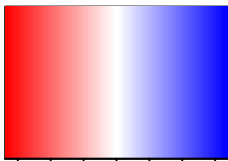

-3    -1    1    3  
Value

### Pattern81 2 genes

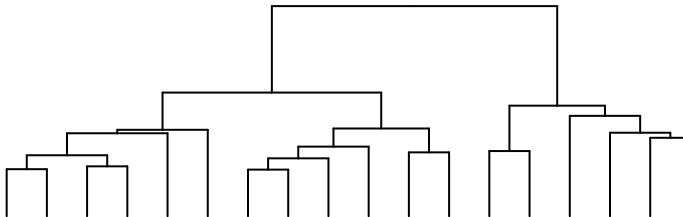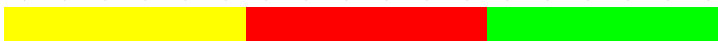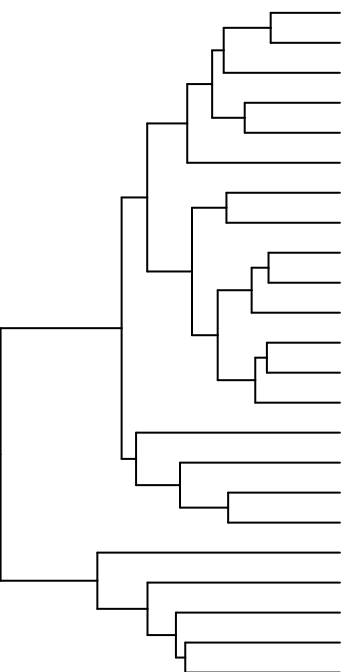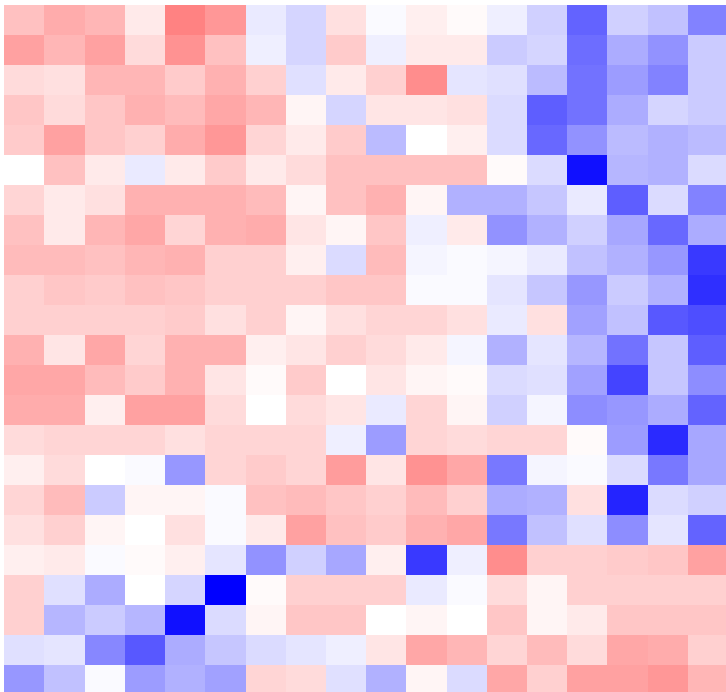

BCm2    ON1    ON2    ON3    BCm3    BCm1    ONm3    BC2    ONm1    BC3    BC1    ONm2    Pi2    Pim1    Pi1    Pim2    Pi3    Pim3

Solyc02g085000.2.1  
Solyc04g080790.2.1  
Solyc04g077220.2.1  
Solyc01g095510.2.1  
Solyc01g060070.2.1  
Solyc07g066110.1.1  
Solyc11g011590.1.1  
Solyc10g085140.1.1  
Solyc02g090620.2.1  
Solyc12g005750.1.1  
Solyc03g095700.1.1  
Solyc01g096640.2.1  
Solyc05g013680.2.1  
Solyc09g010920.1.1  
NCRNA\_7\_139  
Solyc03g113910.2.1  
Solyc01g080100.2.1  
Solyc05g013390.1.1  
Solyc07g066660.2.1  
Solyc03g095480.1.1  
Solyc12g096640.1.1  
Solyc04g074900.2.1  
Solyc06g033850.2.1

### Color Key

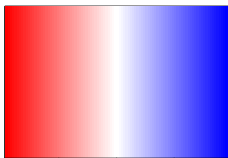

-2 0 2  
Value

### Pattern178 2 genes

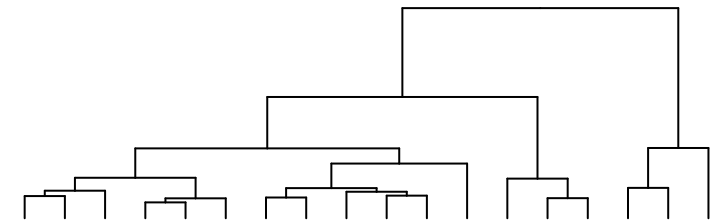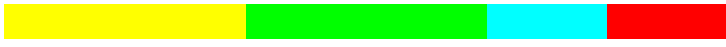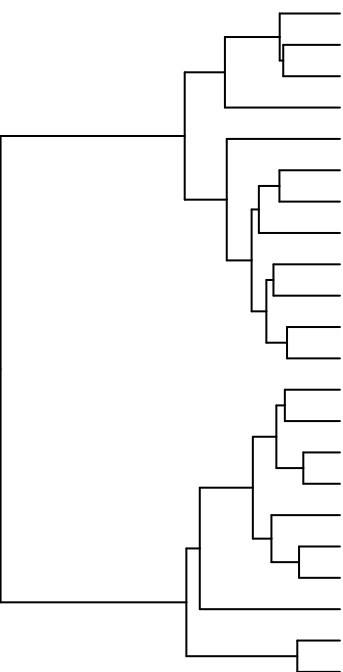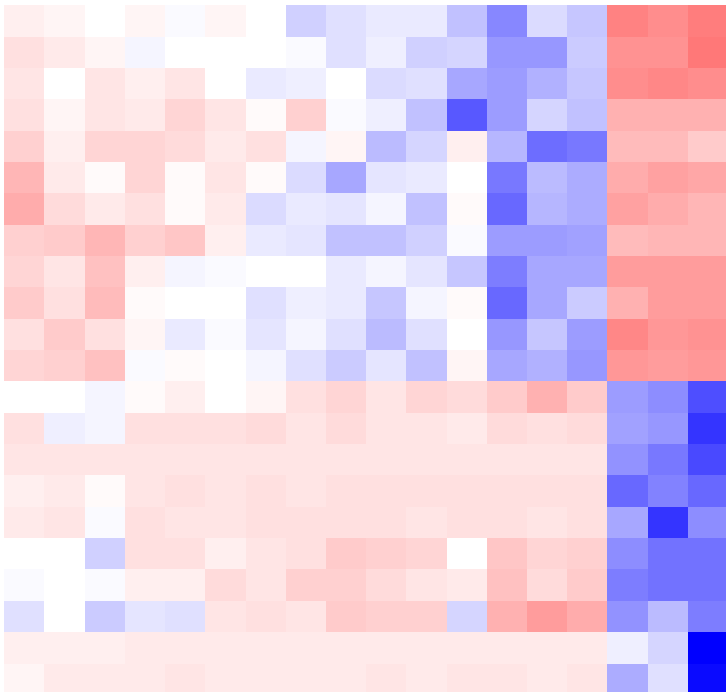

- Solyc02g077160.2.1
- Solyc05g049900.2.1
- Solyc10g083360.1.1
- Solyc03g026050.2.1
- Solyc11g019910.1.1
- Solyc08g006070.2.1
- Solyc07g047840.2.1
- Solyc12g036380.1.1
- Solyc04g014530.1.1
- Solyc02g081600.2.1
- Solyc08g007950.2.1
- Solyc10g047050.1.1
- Solyc10g085450.1.1
- Solyc07g040880.2.1
- Solyc01g107080.2.1
- Solyc02g082450.2.1
- Solyc01g107400.2.1
- Solyc08g008140.2.1
- Solyc01g006430.2.1
- Solyc11g072340.1.1
- Solyc04g025520.1.1
- Solyc11g067000.1.1

Pi1 Pi2 BCm1 BCm2 BCm3 Pi3 Pim2 ON2 ON1 Pim3 ON3 Pim1 ONm2 ONm3 ONm1 BC2 BC3 BC1

### Color Key

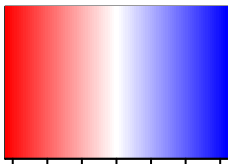

-3 -1 1 2 3  
Value

### Pattern164 2 genes

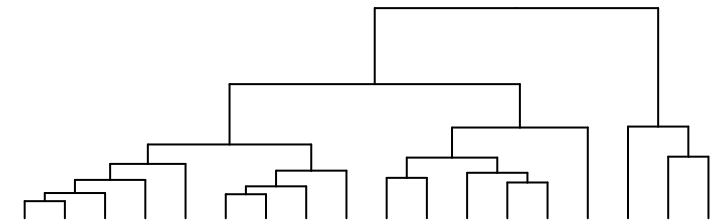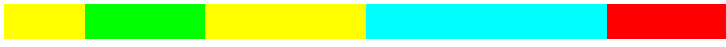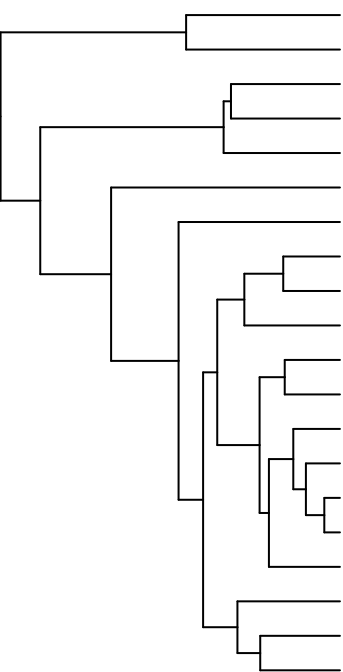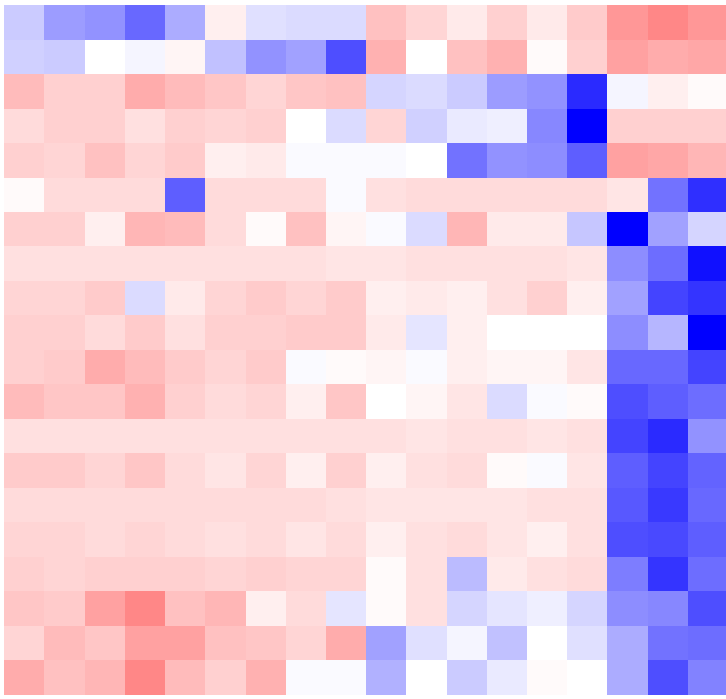

- Solyc06g072040.1.1
- Solyc01g066640.2.1
- Solyc03g120020.2.1
- Solyc06g060630.1.1
- Solyc08g075280.2.1
- Solyc02g067640.2.1
- Solyc01g100390.2.1
- Solyc12g019630.1.1
- Solyc02g077350.1.1
- Solyc08g068240.1.1
- Solyc03g070380.2.1
- Solyc02g072210.1.1
- Solyc02g021350.2.1
- Solyc10g081980.1.1
- Solyc08g007160.2.1
- Solyc10g081970.1.1
- Solyc04g078450.2.1
- Solyc06g053560.2.1
- Solyc12g013620.1.1
- Solyc09g009590.1.1

ONm3 BCm3 ON1 ON3 ON2 BCm2 ONm1 ONm2 BCm1 Pi1 Pi2 Pim1 Pi3 Pim2 Pim3 BC3 BC2 BC1

### Color Key



-2 0 2  
Value

### Pattern53 2 genes

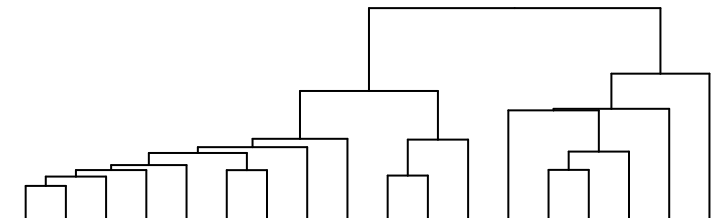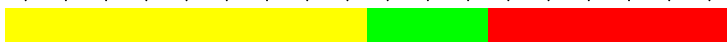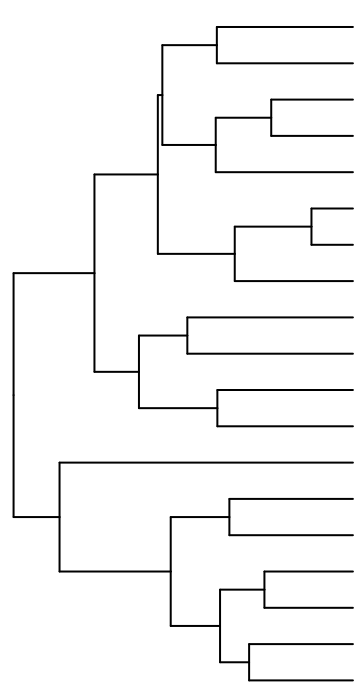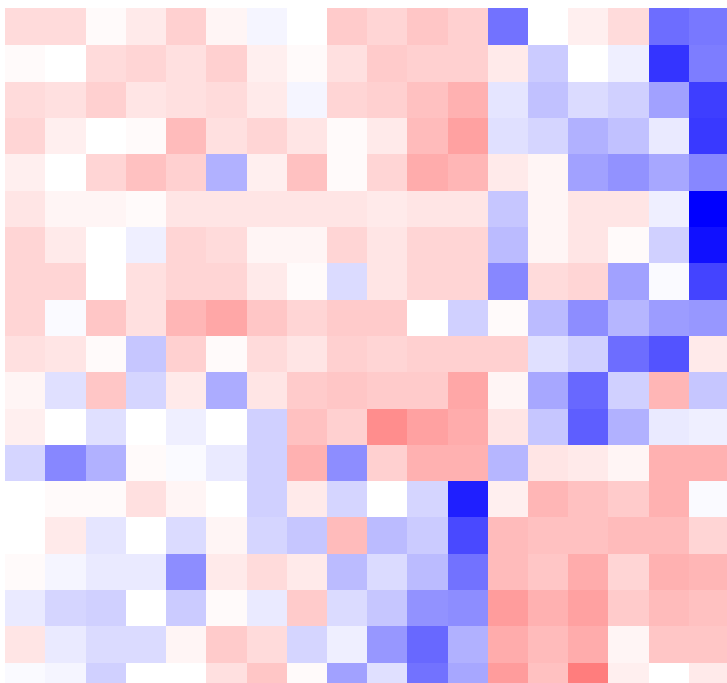

- Solyc03g111760.2.1
- Solyc08g006560.2.1
- Solyc09g010510.2.1
- Solyc01g007590.2.1
- Solyc10g017940.1.1
- Solyc08g079780.1.1
- Solyc01g098940.2.1
- Solyc04g080690.1.1
- Solyc04g011910.2.1
- Solyc10g031560.1.1
- Solyc11g011870.1.1
- Solyc03g111360.2.1
- Solyc01g110810.2.1
- Solyc10g086390.1.1
- Solyc03g120920.1.1
- Solyc04g079190.2.1
- Solyc02g071860.2.1
- Solyc02g085220.2.1
- Solyc12g088070.1.1

Pim2 Pim3 Pim3 ON2 Pim1 Pim1 ON3 Pim2 ON1 ONm3 ONm1 ONm2 BC3 BCm2 BC2 BCm3 BC1 BCm1





### Color Key

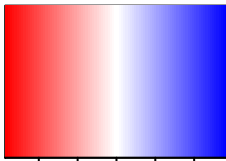

-2 0 1 2  
Value

### Pattern150 2 genes

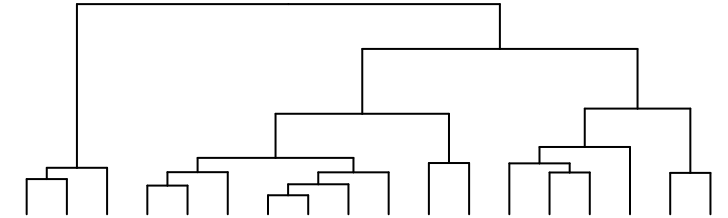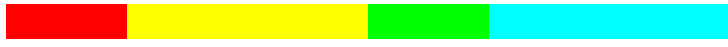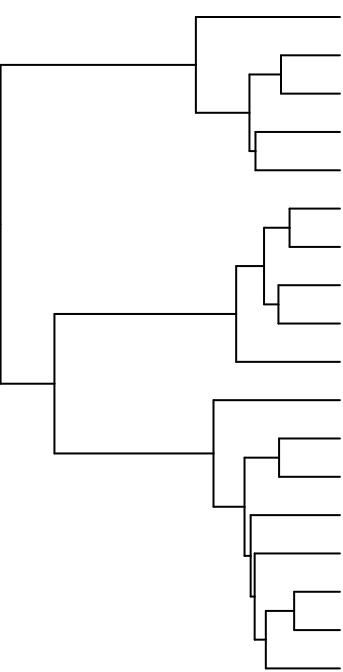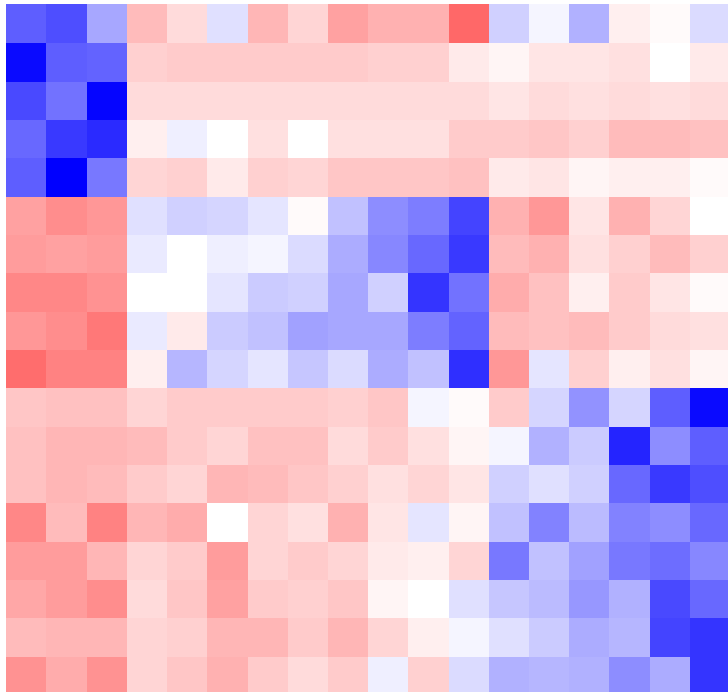

Solyc03g113000.2.1  
Solyc02g069060.2.1  
Solyc06g050140.1.1  
Solyc12g042570.1.1  
Solyc08g078960.2.1  
Solyc02g032870.2.1  
Solyc04g079080.2.1  
Solyc02g078570.2.1  
Solyc09g056170.2.1  
Solyc03g063060.2.1  
Solyc03g121170.2.1  
Solyc01g087180.2.1  
Solyc12g042890.1.1  
Solyc03g115890.2.1  
Solyc02g087010.2.1  
Solyc05g006830.2.1  
Solyc08g013740.2.1  
Solyc02g079740.1.1

BC2 BC1 BC3 ON2 BCm2 BCm1 BCm3 ON3 ON1 ONm3 ONm1 ONm2 Pi1 Pim1 Pi2 Pi3 Pim2 Pim3

### Color Key

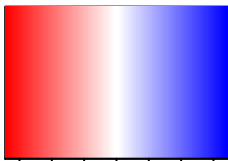

-3    -1    1    3  
Value

### Pattern159 2 genes

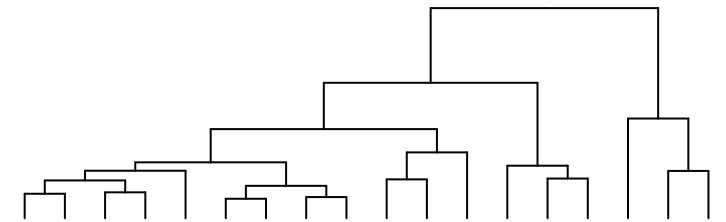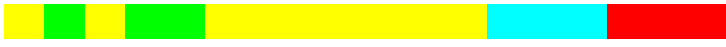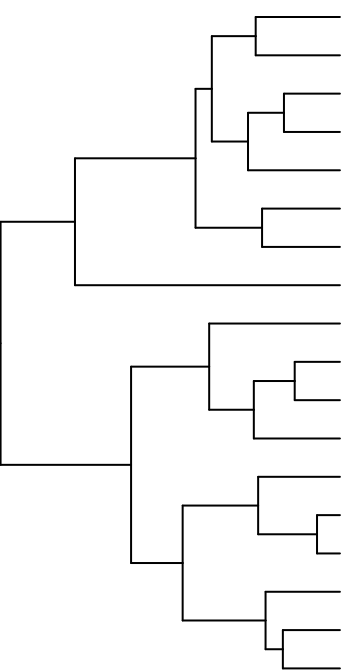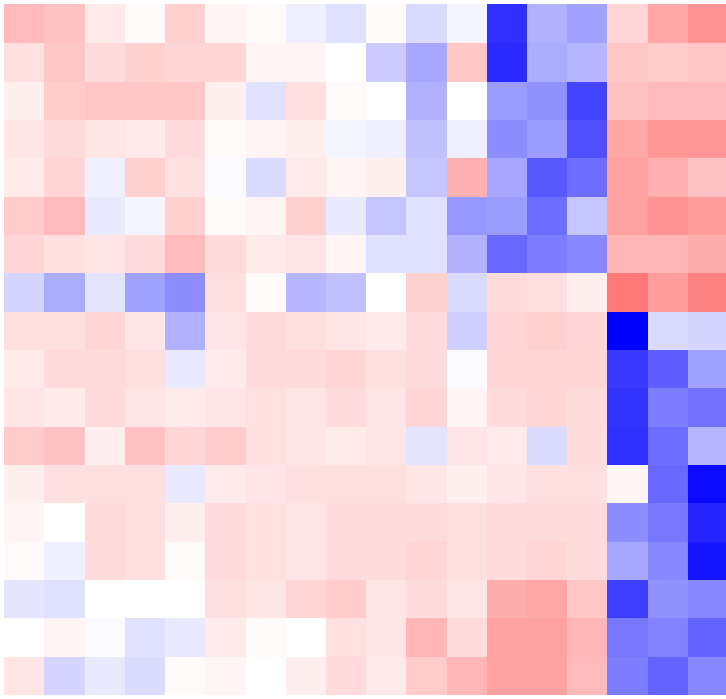

- Solyc07g039310.1.1
- Solyc08g077410.2.1
- Solyc07g063910.2.1
- Solyc01g098560.2.1
- Solyc02g080520.2.1
- Solyc09g005020.1.1
- Solyc07g062740.2.1
- Solyc03g033610.1.1
- Solyc03g083660.1.1
- Solyc12g005940.1.1
- Solyc02g079460.1.1
- Solyc03g123670.2.1
- Solyc08g074710.1.1
- Solyc07g008690.2.1
- Solyc07g052150.2.1
- Solyc01g107160.2.1
- Solyc11g007030.1.1
- Solyc11g028080.1.1

ONm3    ON3    BCm3    ON1    ON2    Pi1    BCm2    Pi2    ONm1    ONm2    Pi3    BCm1    Pim3    Pim2    Pim1    BC1    BC2    BC3

### Color Key

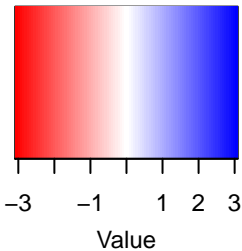

### Pattern160 2 genes

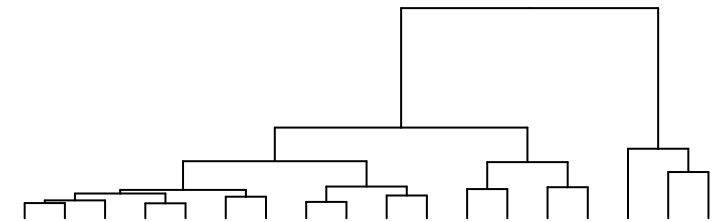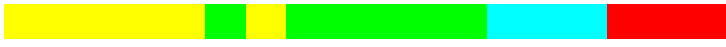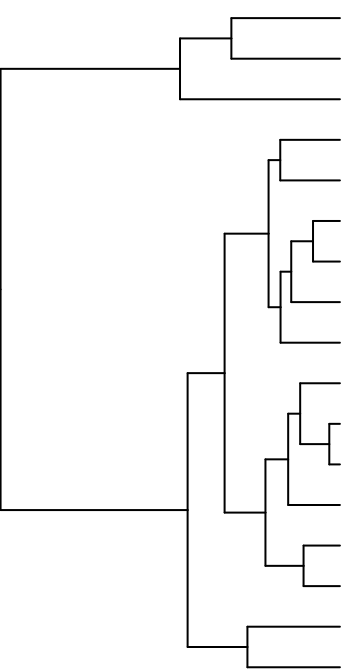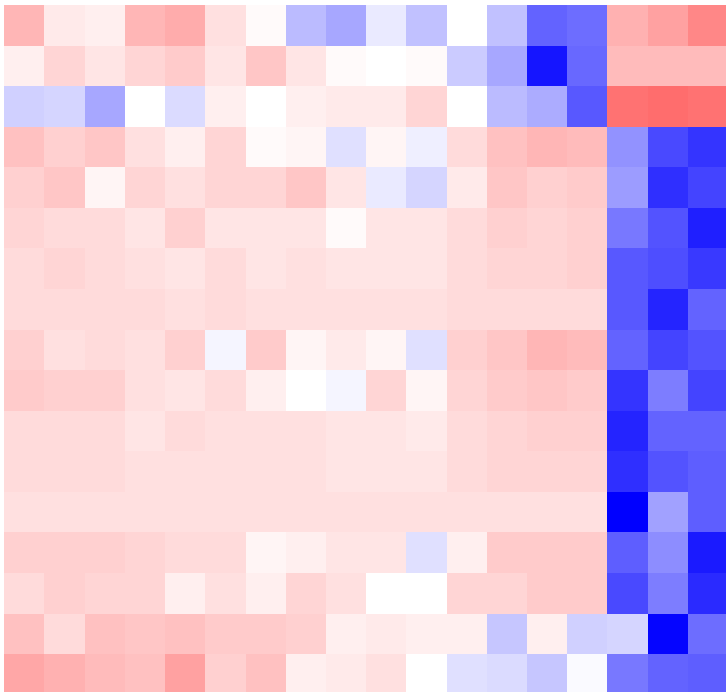

Solyc10g005750.2.1  
Solyc01g099560.2.1  
Solyc10g084950.1.1  
Solyc12g009520.1.1  
Solyc04g005240.1.1  
Solyc06g069650.2.1  
Solyc08g079420.2.1  
Solyc07g052130.1.1  
Solyc09g072930.1.1  
Solyc09g090470.2.1  
Solyc10g076780.1.1  
Solyc02g082950.2.1  
Solyc02g062300.2.1  
Solyc02g089920.1.1  
Solyc02g092880.2.1  
Solyc11g063530.1.1  
Solyc10g006050.2.1

ONm2 BCm3 ONm1 BCm2 BCm1 ON1 ONm3 ON3 Pi2 ON2 Pi1 Pi3 Pim1 Pim3 Pim2 BC1 BC2 BC3

### Color Key

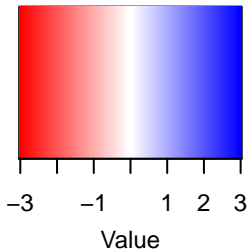

### Pattern162 2 genes

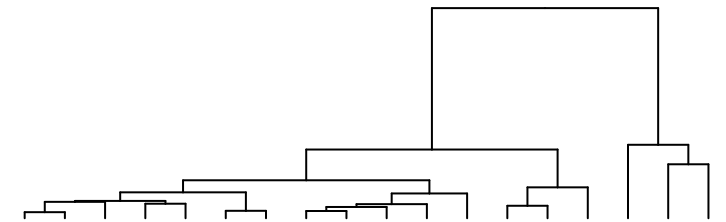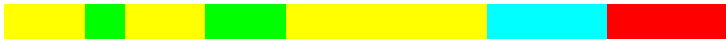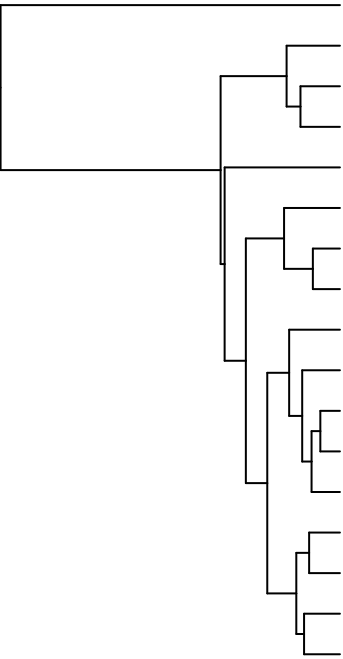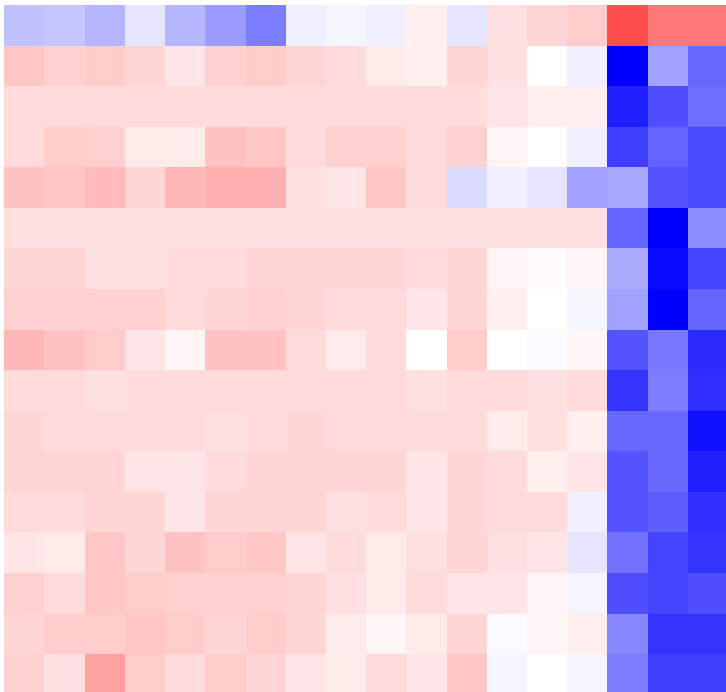

- Solyc04g080470.2.1
- Solyc08g068790.1.1
- Solyc08g068680.2.1
- Solyc01g079810.2.1
- Solyc06g009390.2.1
- Solyc05g051350.1.1
- Solyc11g072140.1.1
- Solyc04g074680.1.1
- Solyc09g082570.2.1
- Solyc07g054720.1.1
- Solyc01g009870.2.1
- Solyc10g008150.1.1
- Solyc12g005680.1.1
- Solyc10g074730.1.1
- Solyc01g097450.2.1
- Solyc05g055080.1.1
- Solyc04g010020.2.1

### Color Key

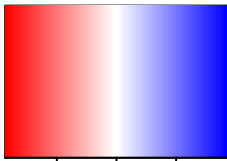

-2 0 2  
Value

### Pattern46 2 genes

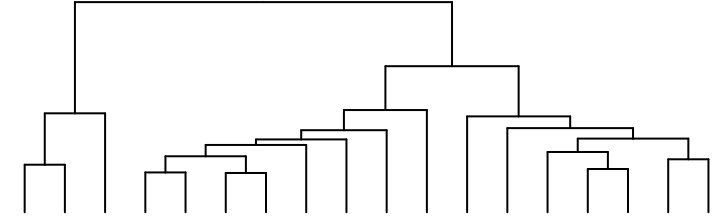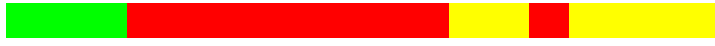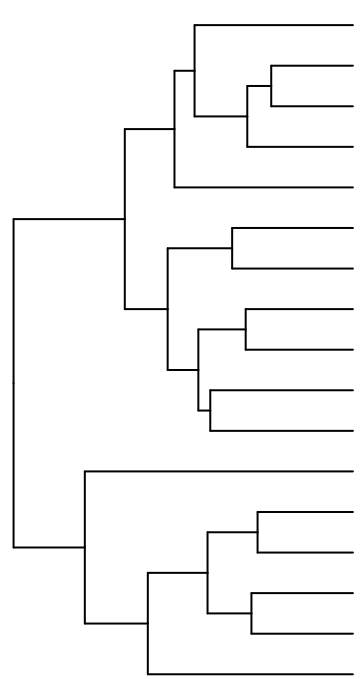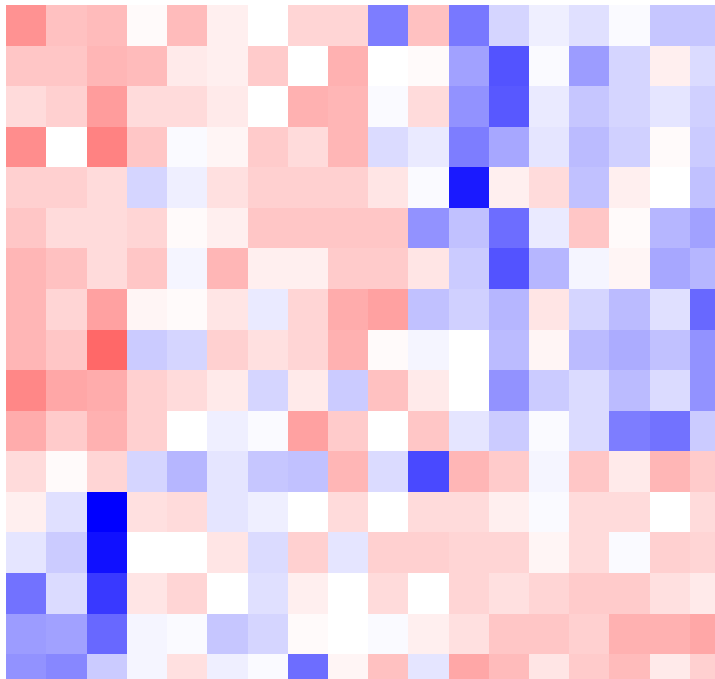

- Solyc12g006250.1.1
- Solyc12g056540.1.1
- Solyc03g114520.2.1
- Solyc12g056110.1.1
- Solyc07g040760.1.1
- Solyc05g055500.1.1
- Solyc12g005260.1.1
- Solyc10g076280.1.1
- Solyc05g047540.2.1
- Solyc01g068340.2.1
- Solyc01g066740.2.1
- Solyc01g110070.1.1
- Solyc09g098320.1.1
- Solyc02g085630.2.1
- Solyc07g045430.2.1
- Solyc03g078360.1.1
- Solyc02g085610.2.1

Pl2 Pl3 Pl1 BCm2 Plm3 Plm2 BC2 BCm1 Plm1 BC3 BC1 ONm2 ONm3 BCm3 ON2 ONm1 ON1 ON3

### Color Key

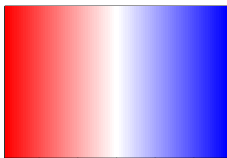

-2 0 1 2  
Value

### Pattern117 2 genes

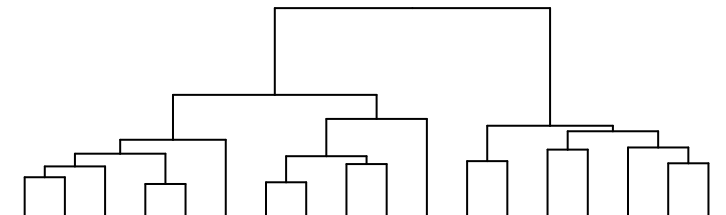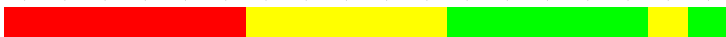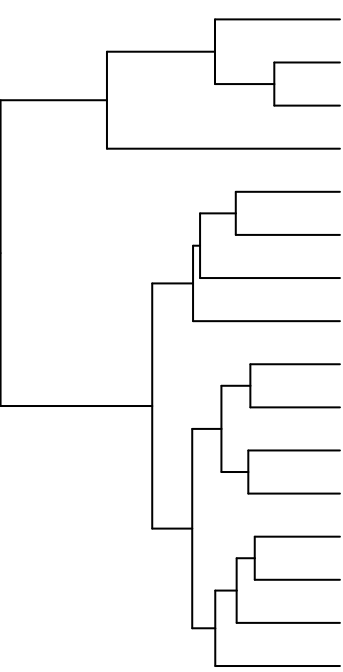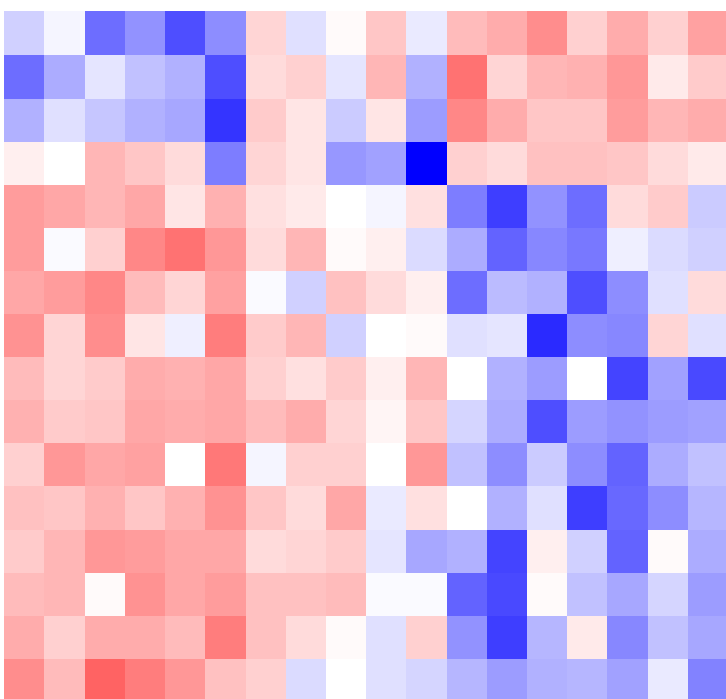

Solyc12g089180.1.1  
Solyc10g078560.1.1  
Solyc06g062790.2.1  
Solyc02g080330.2.1  
Solyc02g093480.2.1  
Solyc11g070140.1.1  
Solyc10g011960.1.1  
Solyc05g018890.1.1  
Solyc01g060410.2.1  
Solyc08g083270.1.1  
Solyc12g076320.1.1  
Solyc02g086140.1.1  
Solyc05g014400.2.1  
Solyc06g075850.1.1  
Solyc04g071660.2.1  
Solyc08g006640.2.1

Pim2 Pim3 BC3 BC2 Pim1 BC1 BCm2 Pi1 Pi3 Pi2 BCm1 ON2 ONm3 ONm1 ONm2 ON1 BCm3 ON3

### Color Key

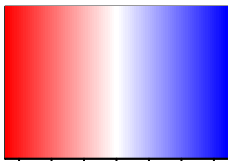

-3    -1    1    3  
Value

### Pattern105 2 genes

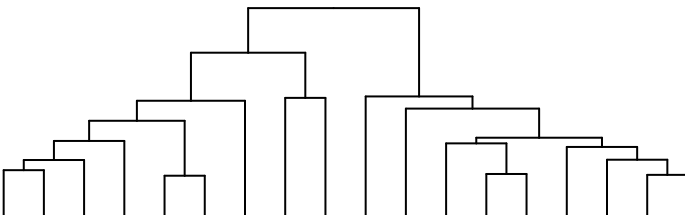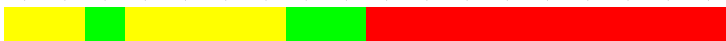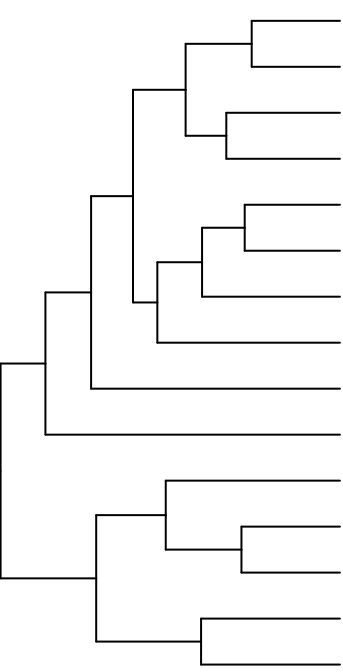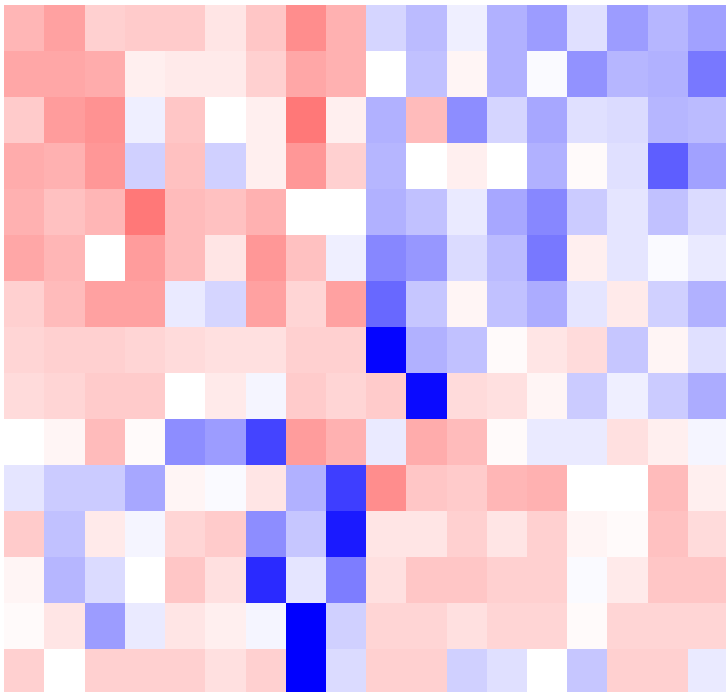

Solyc08g076100.2.1  
Solyc03g123600.2.1  
Solyc10g054670.1.1  
Solyc03g046380.1.1  
Solyc03g034080.2.1  
Solyc03g118080.2.1  
Solyc09g075650.2.1  
Solyc08g075320.2.1  
Solyc09g014750.1.1  
Solyc03g095320.1.1  
Solyc06g082350.2.1  
Solyc09g098420.1.1  
Solyc02g082990.2.1  
Solyc04g064920.2.1  
Solyc02g077510.2.1

BCm3    ONm3    ON1    ONm2    ONm1    BCm2    BCm1    ON3    ON2    BC2    BC1    BC3    Pim3    Pim2    Pim1    Pim2    Pim3



### Color Key

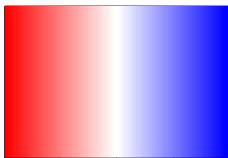

-2 0 2  
Value

### Pattern107 2 genes

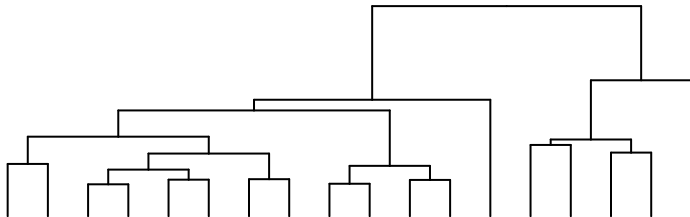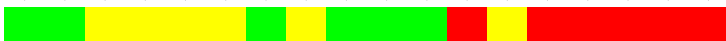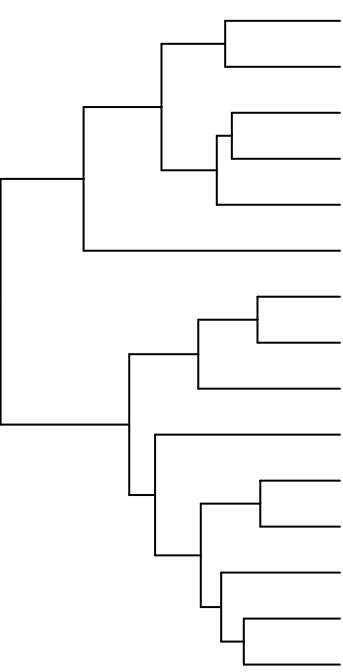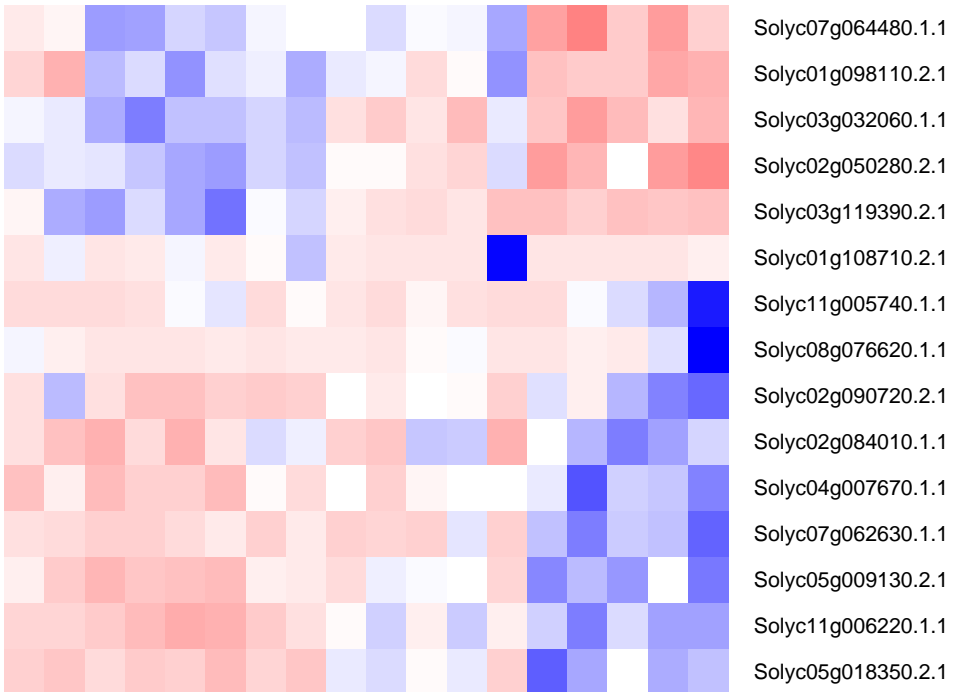

ON1 Pim1 ONm2 BCm3 ONm1 BCm2 ON3 ONm3 ON2 Pim3 Pim2 Pi3 BCm1 BC3 BC2 Pi1 Pi2 BC1

### Color Key

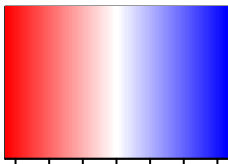

-3 -1 1 2 3  
Value

### Pattern163 2 genes

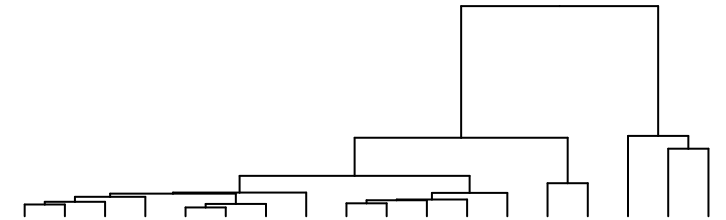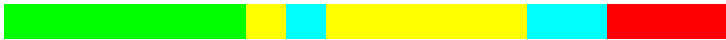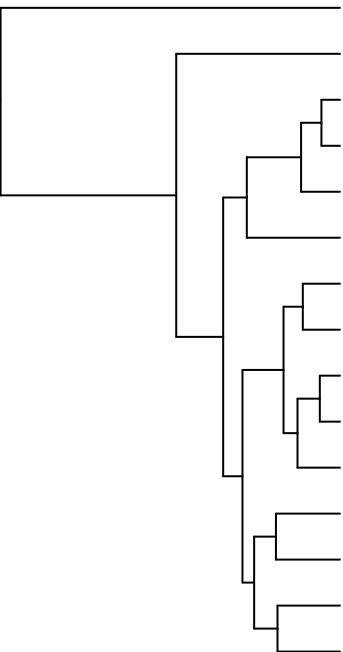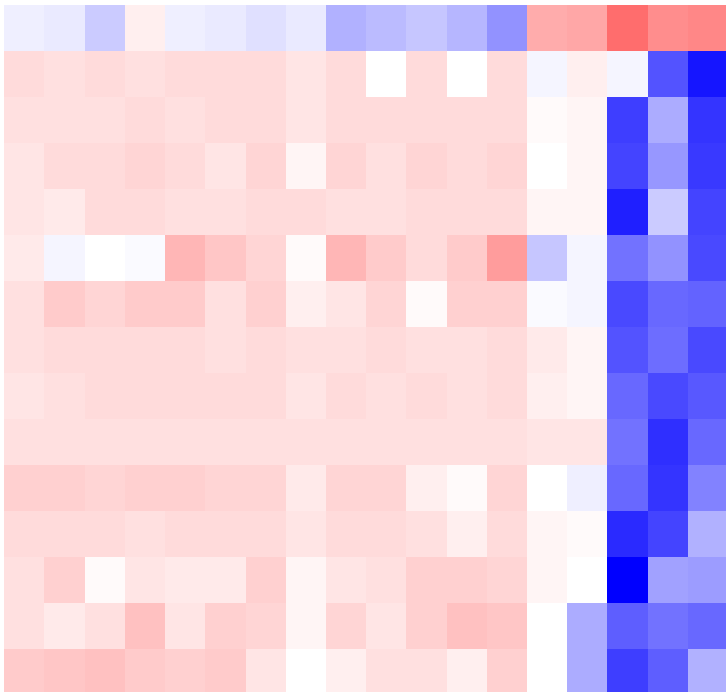

Pim2 ON3 ON1 Pim1 Pim3 ON2 BCm3 Pi3 BCm2 ONm3 ONm2 BCm1 ONm1 Pi2 Pi1 BC3 BC1 BC2

Solyc07g042910.2.1  
Solyc10g008360.2.1  
Solyc09g014820.2.1  
Solyc10g085860.1.1  
Solyc06g082430.1.1  
Solyc10g006060.2.1  
Solyc01g096510.2.1  
Solyc02g080890.2.1  
Solyc02g071130.2.1  
Solyc10g011930.1.1  
Solyc04g011770.2.1  
Solyc03g005480.2.1  
Solyc01g099210.2.1  
Solyc08g082460.2.1  
Solyc09g061330.1.1

### Color Key

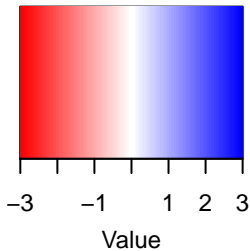

### Pattern179 2 genes

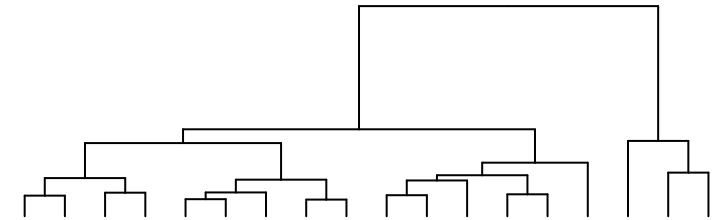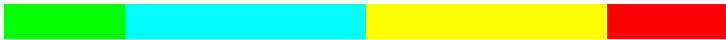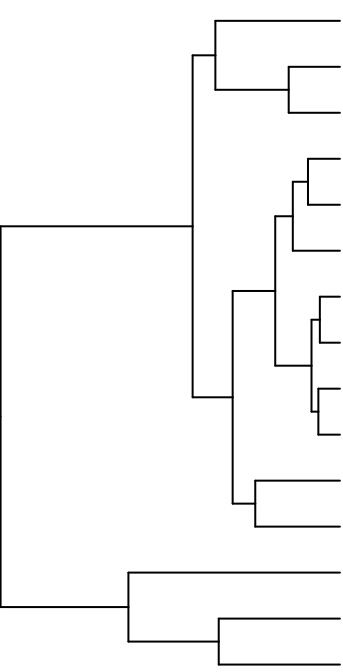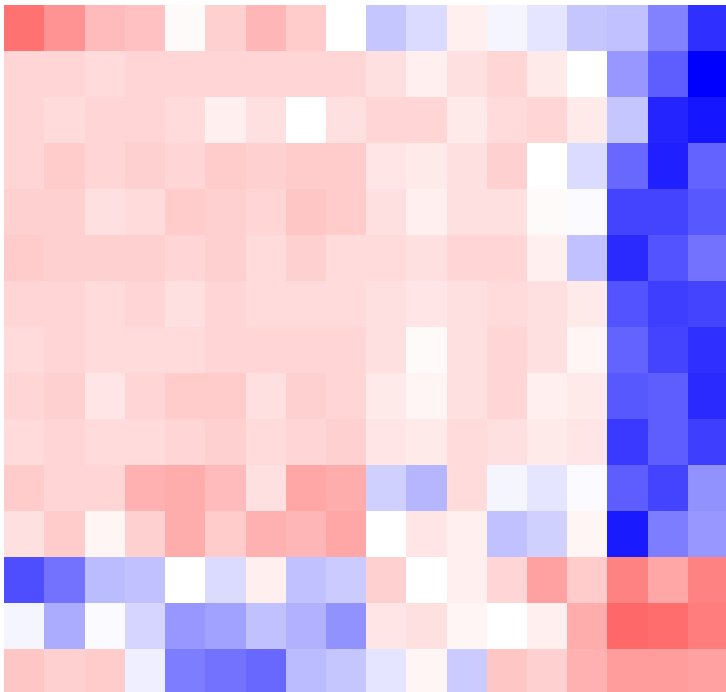

Solyc05g052190.2.1  
Solyc11g007500.1.1  
Solyc05g053620.2.1  
Solyc01g096420.2.1  
Solyc09g075450.2.1  
Solyc04g007250.1.1  
Solyc07g056500.2.1  
Solyc02g072070.2.1  
Solyc06g076450.2.1  
Solyc08g076160.2.1  
Solyc02g090980.1.1  
Solyc09g009620.1.1  
Solyc07g014600.1.1  
Solyc06g008740.2.1  
Solyc02g064720.2.1

ON3 ON1 ON2 ONm3 Pim2 Pim3 Pim1 ONm1 ONm2 BCm2 Pi1 Pi3 BCm3 Pi2 BCm1 BC1 BC3 BC2

### Color Key

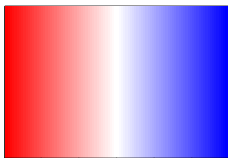

-2 0 1 2  
Value

### Pattern201 2 genes

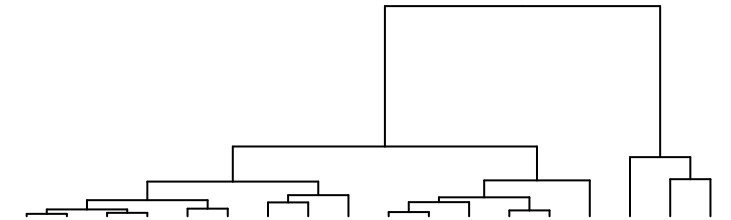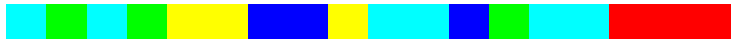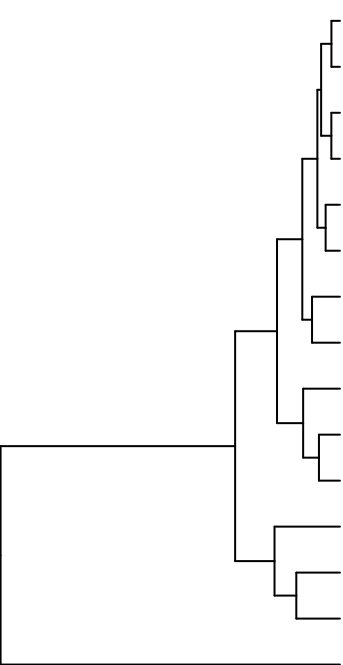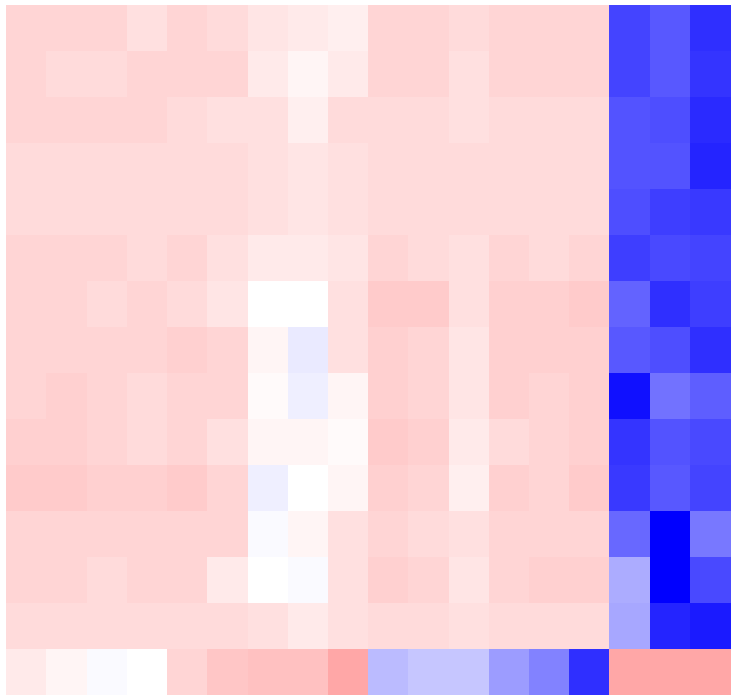

Solyc11g007490.1.1  
Solyc02g079530.2.1  
Solyc04g007620.1.1  
Solyc02g077290.1.1  
Solyc12g056590.1.1  
Solyc10g080010.1.1  
Solyc02g086590.2.1  
Solyc08g078650.2.1  
Solyc01g008690.2.1  
Solyc05g052750.2.1  
Solyc06g062920.2.1  
Solyc07g051950.2.1  
Solyc01g107770.1.1  
Solyc02g077570.1.1  
Solyc10g085280.1.1

Pim1 ON3 ONm3 ON2 BCm3 BCm2 Pi2 Pi1 BCm1 ONm1 Pim2 Pi3 ON1 ONm2 Pim3 BC1 BC3 BC2

### Color Key

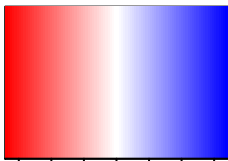

-3   -1   1   3  
Value

### Pattern36 2 genes

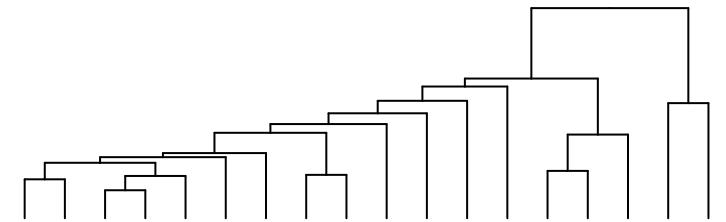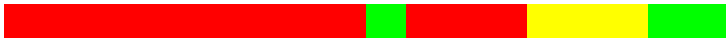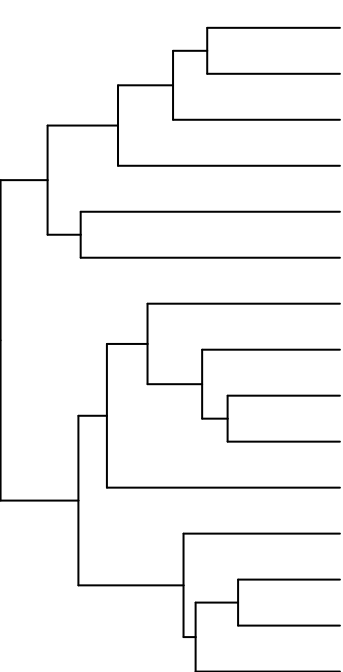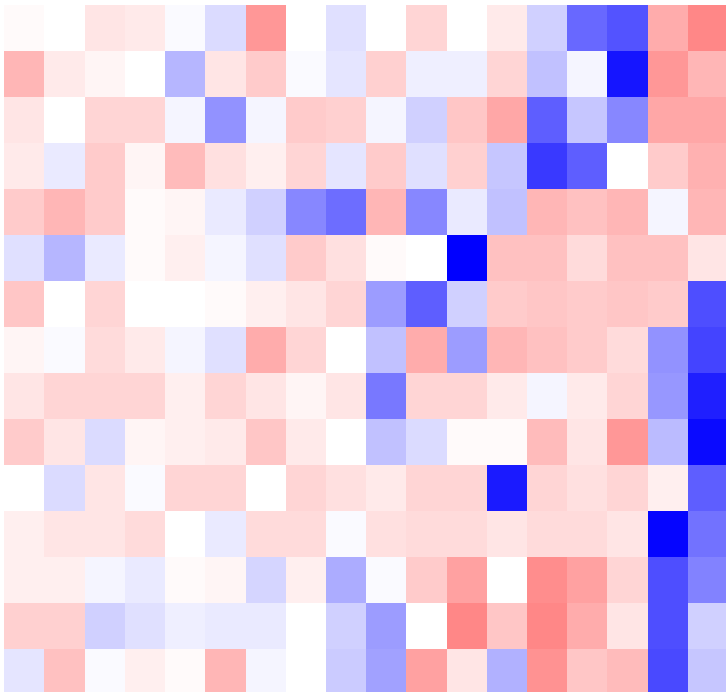

BCm2   ON3   Pim2   BCm3   Pim3   ON1   BC3   ON2   BC2   Pi3   BCm1   BC1   Pim1   ONm2   ONm3   ONm1   Pi1   Pi2

Solyc08g075810.2.1  
Solyc03g026120.2.1  
Solyc03g118220.1.1  
Solyc12g006260.1.1  
Solyc08g077610.1.1  
Solyc04g025730.1.1  
Solyc07g052180.1.1  
Solyc11g012750.1.1  
Solyc12g088800.1.1  
Solyc04g080070.1.1  
Solyc03g025580.1.1  
Solyc07g056180.1.1  
Solyc04g039720.1.1  
Solyc07g048000.2.1  
Solyc03g121710.2.1



### Color Key

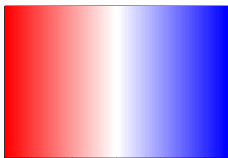

-2      0      1      2  
Value

### Pattern87 2 genes

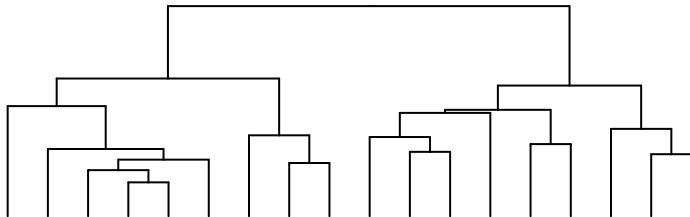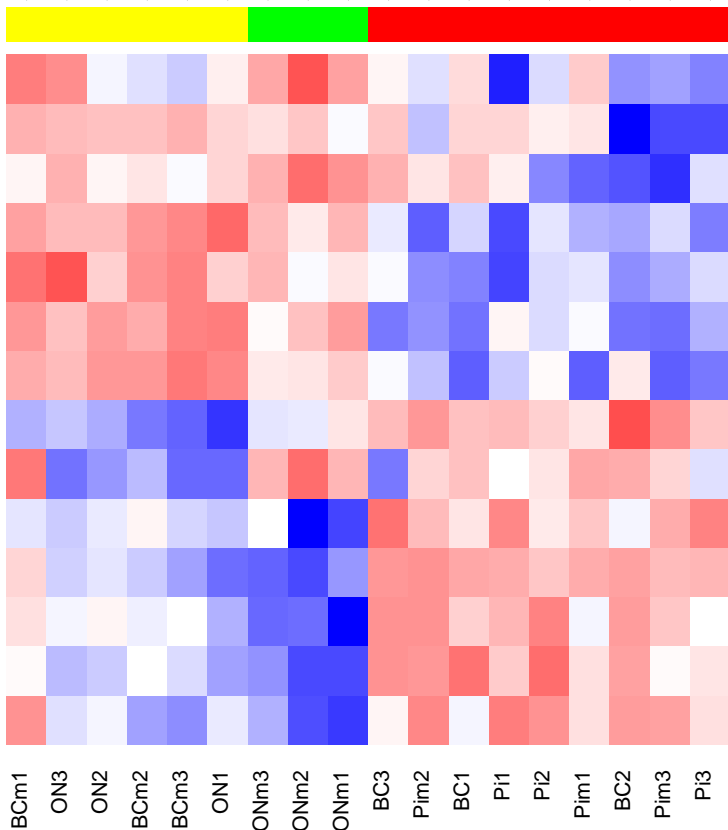

Solyc11g072760.1.1  
Solyc09g066410.1.1  
Solyc12g098130.1.1  
Solyc07g064720.2.1  
Solyc02g087480.2.1  
Solyc07g045160.2.1  
Solyc08g081030.1.1  
Solyc05g050920.2.1  
Solyc05g006460.1.1  
Solyc11g006930.1.1  
Solyc12g076350.1.1  
Solyc01g060170.2.1  
Solyc09g075060.2.1  
Solyc02g021760.2.1

BCm1    ON3    ON2    BCm2    BCm3    ON1    ONm3    ONm2    ONm1    BC3    Pim2    BC1    Pi1    Pi2    Pim1    BC2    Pim3    Pi3

### Color Key

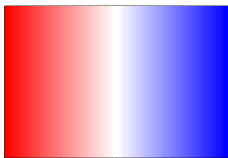

-2 0 2

Value

### Pattern192

### 2 genes

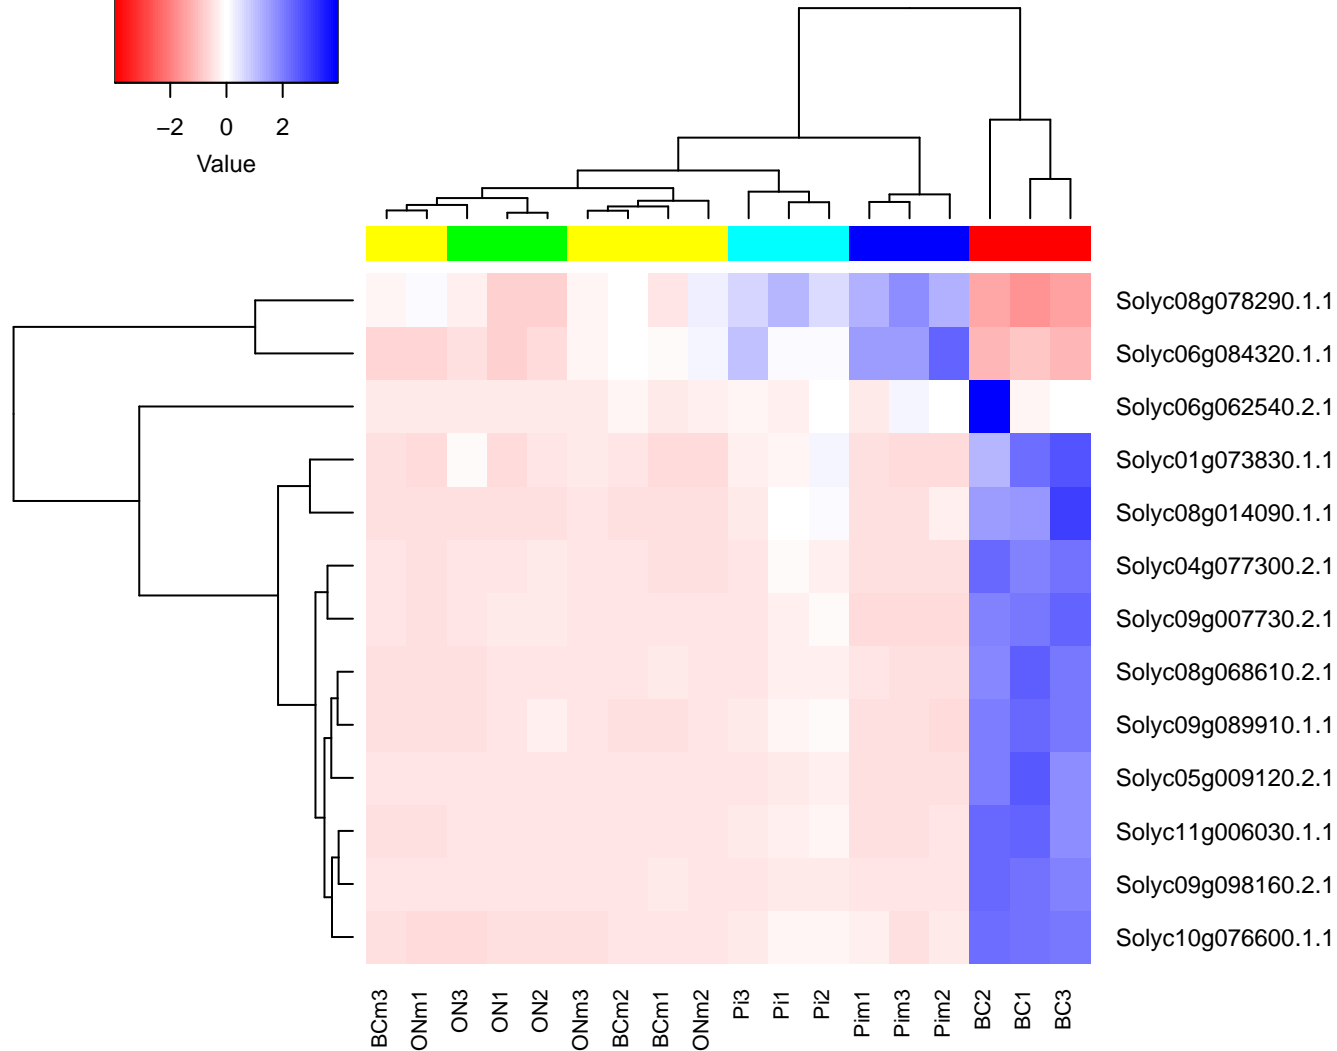



### Color Key

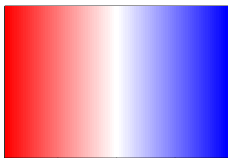

-2 0 2  
Value

### Pattern56 2 genes

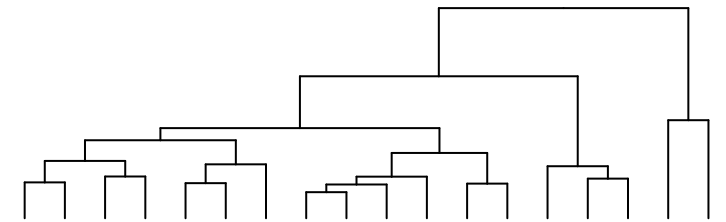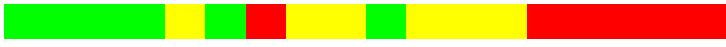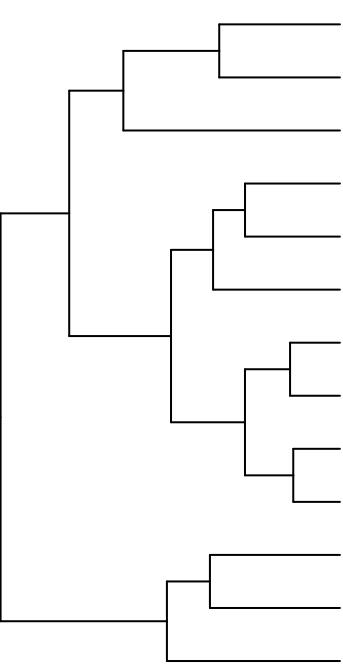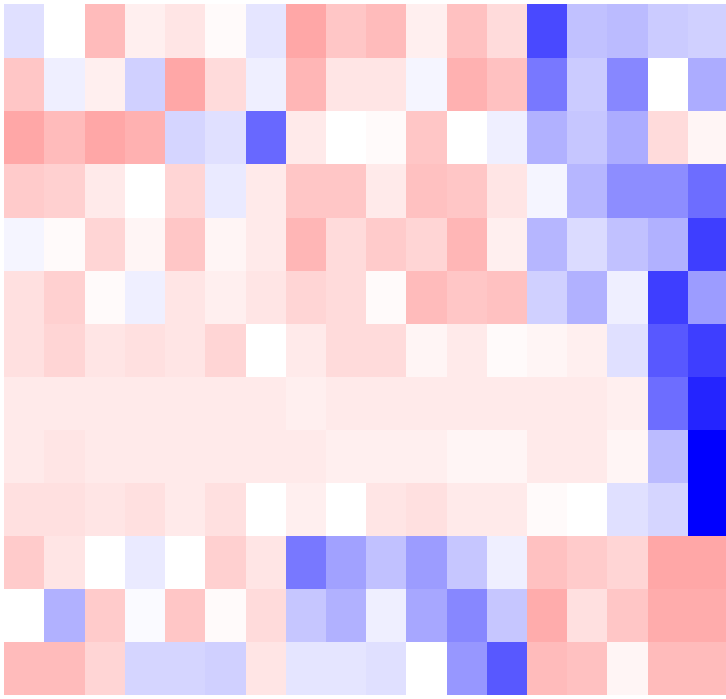

Solyc10g078170.1.1  
Solyc07g026910.1.1  
Solyc11g045020.1.1  
Solyc12g033060.1.1  
TRNA\_10\_70  
Solyc12g033040.1.1  
Solyc03g121140.2.1  
Solyc10g083880.1.1  
Solyc08g080560.1.1  
Solyc08g006410.2.1  
NCRNA\_7\_243  
Solyc09g005220.1.1  
Solyc03g033270.2.1

Pl2  
ONm2  
ONm1  
Pl1  
Pim1  
ONm3  
BCm2  
ON2  
Pim3  
Pl3  
ON1  
Pim2  
ON3  
BC3  
BCm3  
BC2  
BC1  
BCm1

### Color Key

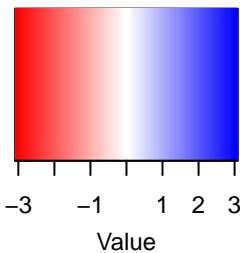

### Pattern61 2 genes

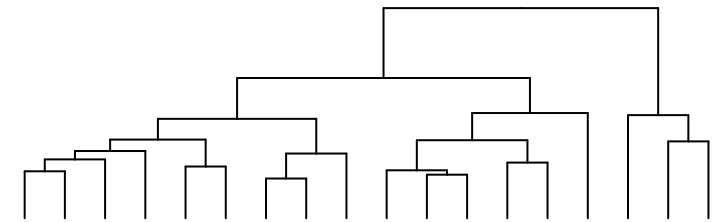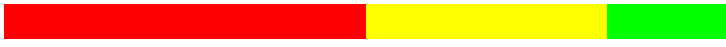

- Solyc05g015380.2.1
- Solyc06g034370.1.1
- Solyc01g105450.2.1
- Solyc10g083430.1.1
- Solyc10g009210.2.1
- Solyc09g091530.1.1
- Solyc02g081360.2.1
- Solyc02g081350.2.1
- Solyc12g088220.1.1
- Solyc02g032000.1.1
- Solyc10g074520.1.1
- Solyc02g088070.2.1
- Solyc03g093310.2.1

- BC3
- BC2
- ONm2
- ON1
- ONm1
- ON3
- ON2
- ONm3
- BC1
- BCm2
- Pim3
- Pim2
- BCm3
- Pim1
- BCm1
- Pi3
- Pi2
- Pi1

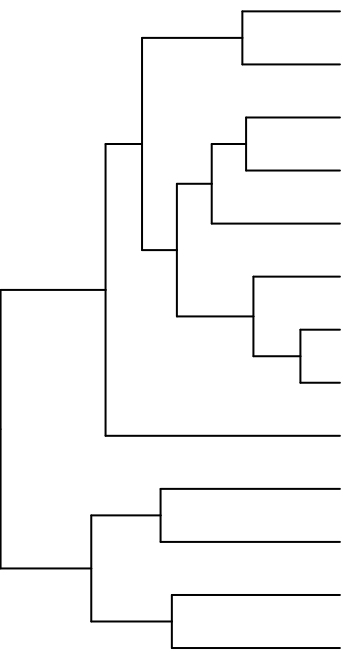

### Color Key

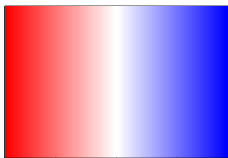

-2 0 2  
Value

### Pattern39 2 genes

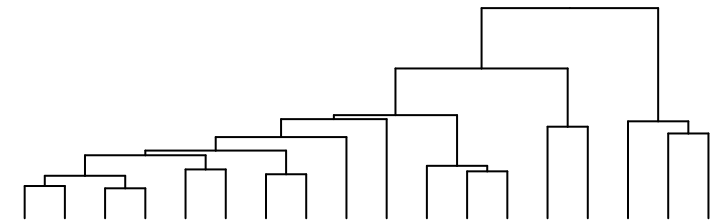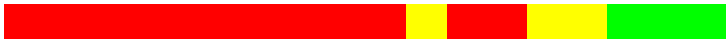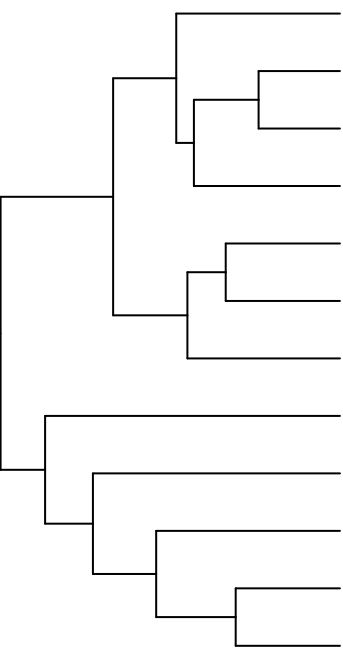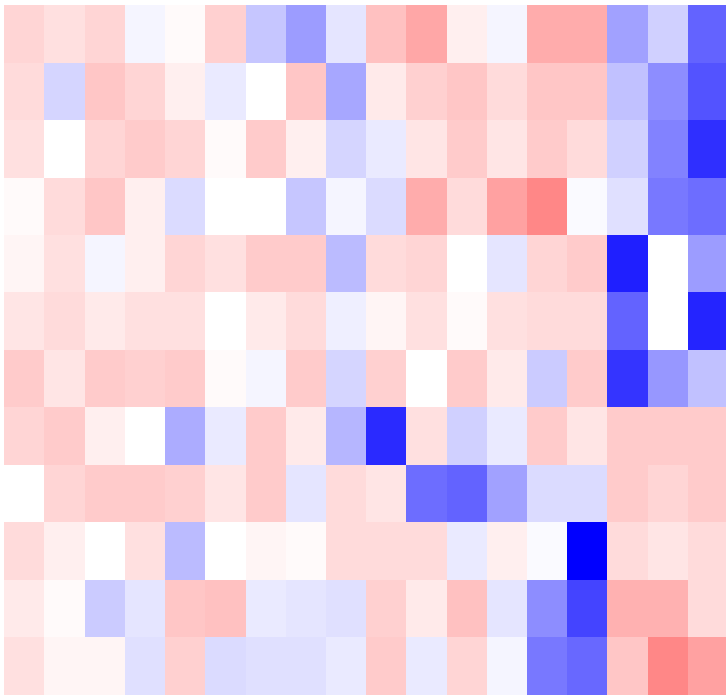

Solyc01g088070.2.1  
Solyc04g007630.1.1  
Solyc09g015450.2.1  
Solyc07g063410.2.1  
Solyc03g116290.1.1  
Solyc10g085870.1.1  
Solyc02g005070.1.1  
Solyc11g065580.1.1  
Solyc08g074400.1.1  
NCRNA\_3\_288  
Solyc03g096170.1.1  
Solyc06g068200.1.1

Pl2 BCm2 BC3 BCm3 Pl1 BC2 ONm1 BC1 Pl3 ONm2 ON2 BCm1 ONm3 ON3 ON1 Pim2 Pim1 Pim3

### Color Key

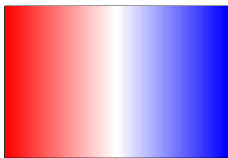

-2 0 2  
Value

### Pattern60 2 genes

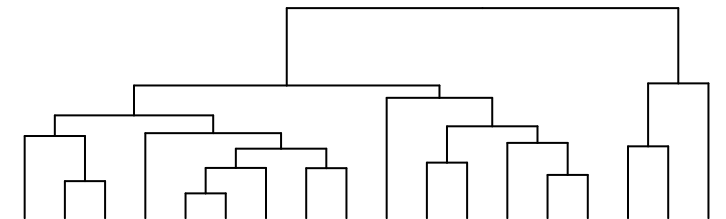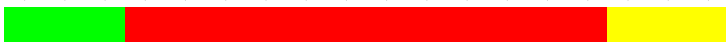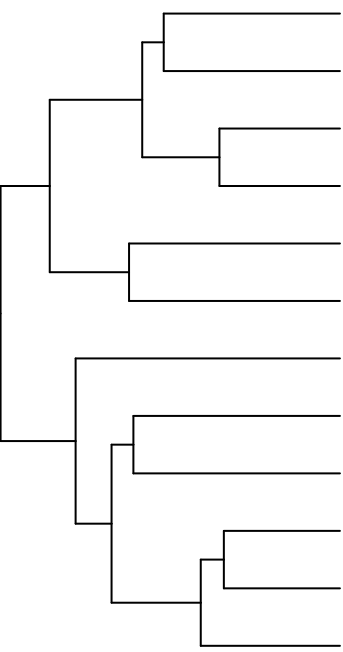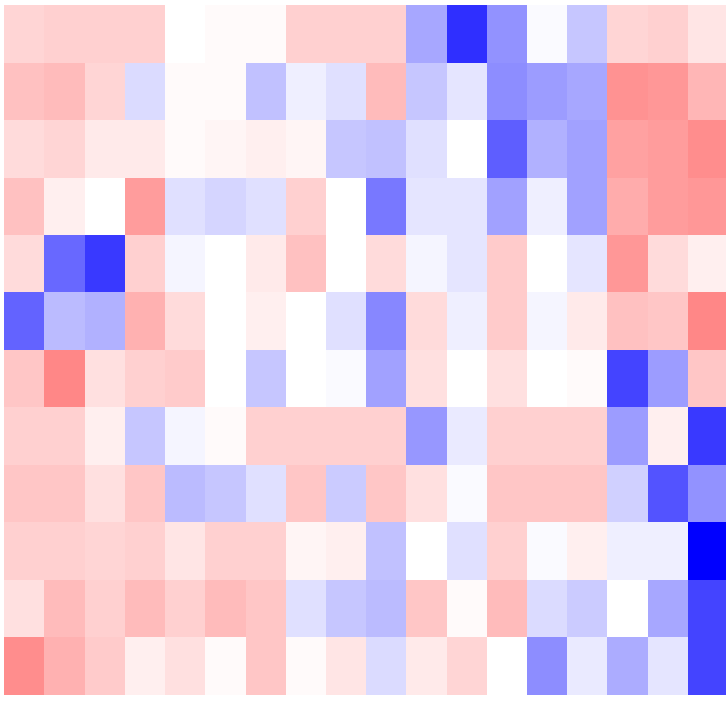

Solyc07g064410.1.1  
Solyc11g013890.1.1  
Solyc09g075080.2.1  
Solyc12g008530.1.1  
Solyc02g062650.2.1  
Solyc06g051630.2.1  
Solyc09g008090.2.1  
Solyc12g036360.1.1  
Solyc04g008930.1.1  
Solyc06g035530.2.1  
Solyc01g080680.2.1  
Solyc12g014290.1.1

### Color Key

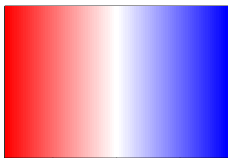

-2 0 2  
Value

### Pattern200 2 genes

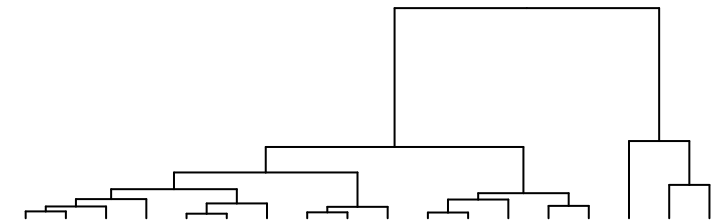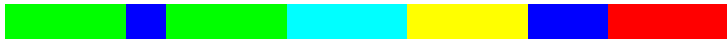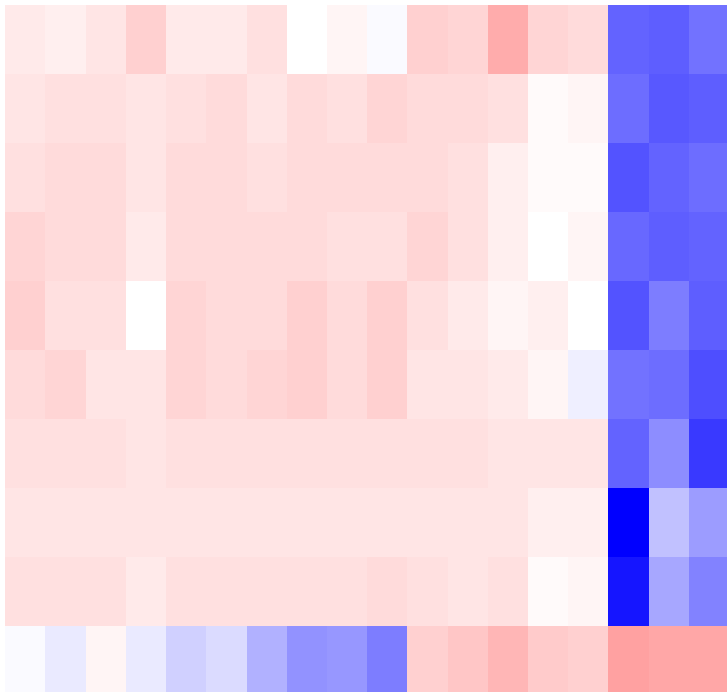

Solyc11g013120.1.  
Solyc02g078530.2.  
Solyc06g066590.2.  
Solyc02g077370.1.  
Solyc02g087740.2.  
Solyc05g007220.2.  
Solyc01g095080.2.  
Solyc11g069560.1.  
Solyc01g108360.2.  
Solyc10g055390.1.

ON3 ON1 Pim1 Pim3 ON2 Pim2 ONm1 ONm3 ONm2 BCm3 BCm2 BCm1 Pi2 Pi1 BC1 BC3 BC2

### Color Key

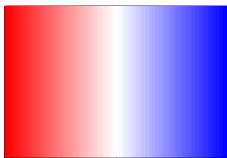

-2 0 2  
Value

### Pattern49 2 genes

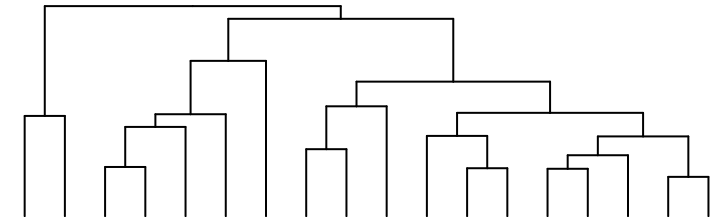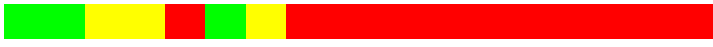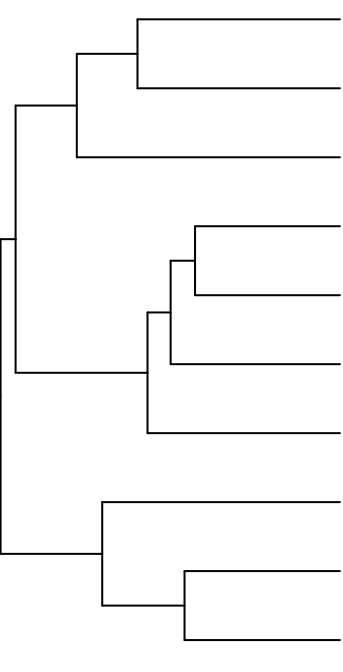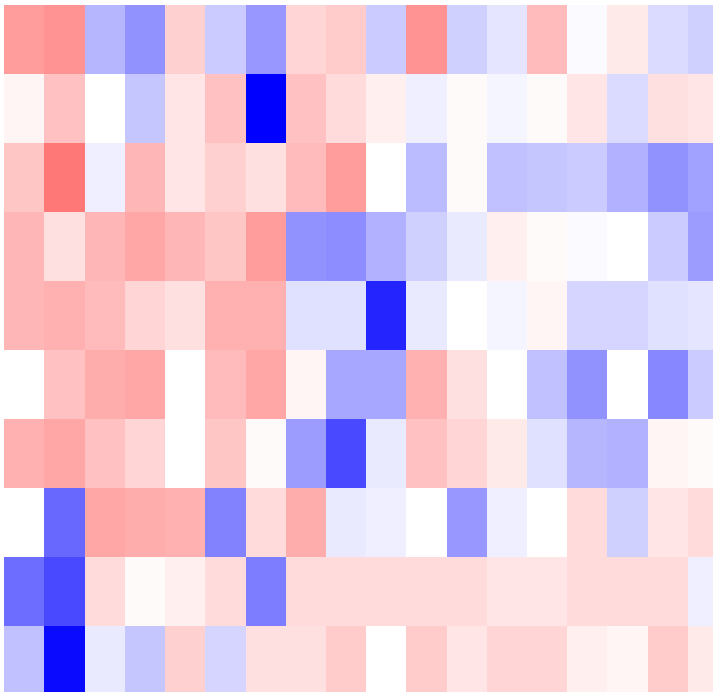

ONm1 ONm2 ON3 ON2 BCm3 ONm3 ON1 Pim1 BC1 BCm1 BC3 Pim3 BCm2 Pi3 Pim2 Pi2 BC2 Pi1

Solyc01g107850.2  
Solyc09g015710.1  
Solyc07g019600.1  
Solyc03g116630.2  
Solyc12g005660.1  
Solyc05g005680.2  
Solyc03g118900.1  
Solyc07g005220.1  
Solyc03g006910.2  
Solyc06g066530.1

### Color Key

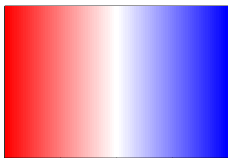

-2 0 2  
Value

### Pattern76 2 genes

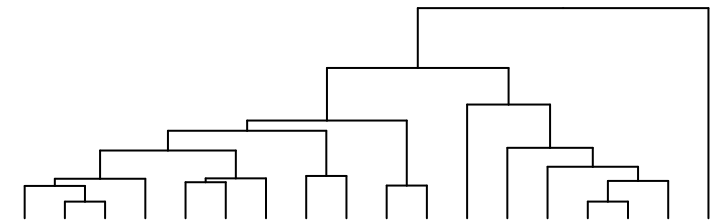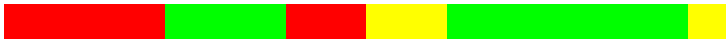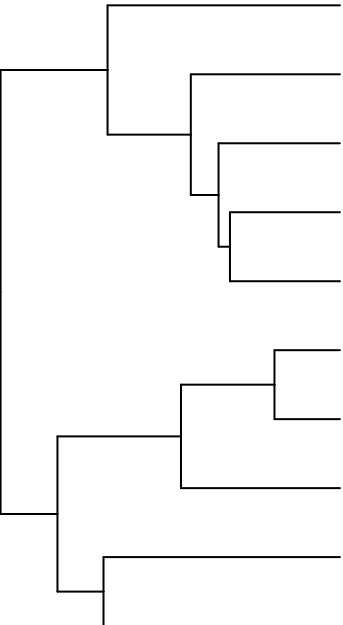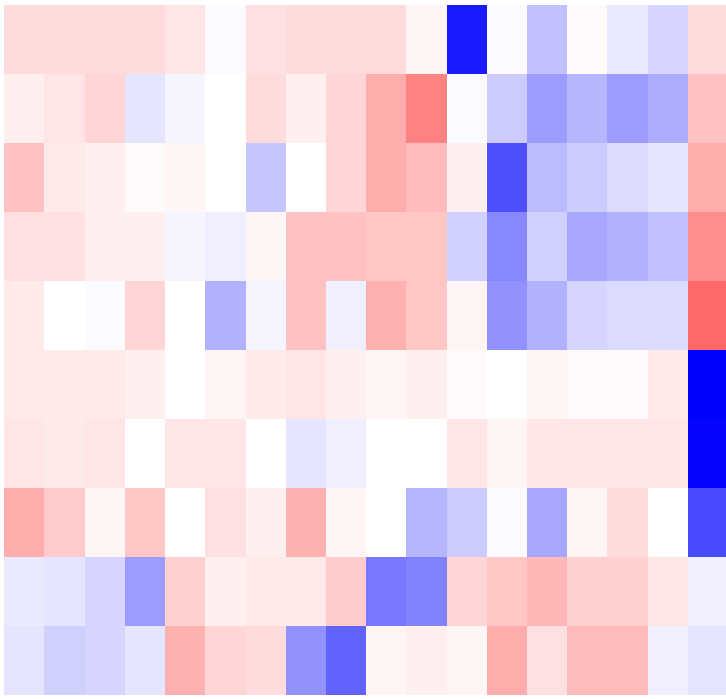

BC3 BC2 ON2 ON1 Pi2 ONm2 ONm3 ON3 BC1 BCm3 BCm2 Pim1 Pim3 ONm1 Pim2 Pi3 Pi1 BCm1

Solyc07g007710.2.  
Solyc05g013860.2.  
Solyc12g006000.1.  
Solyc03g006860.2.  
Solyc03g097690.2.  
Solyc04g015620.2.  
Solyc08g061020.1.  
Solyc01g110750.2.  
Solyc02g077650.1.  
Solyc02g032360.2.

### Color Key

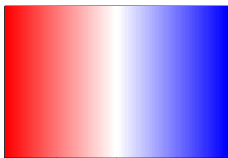

-2 0 2  
Value

### Pattern78 2 genes

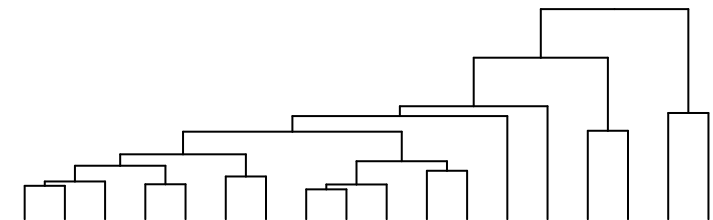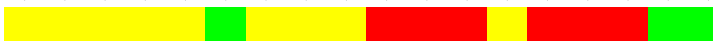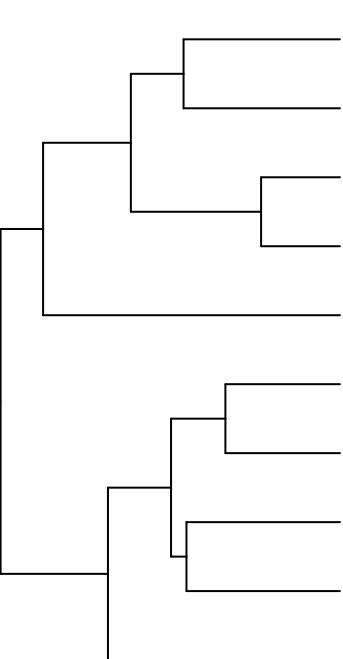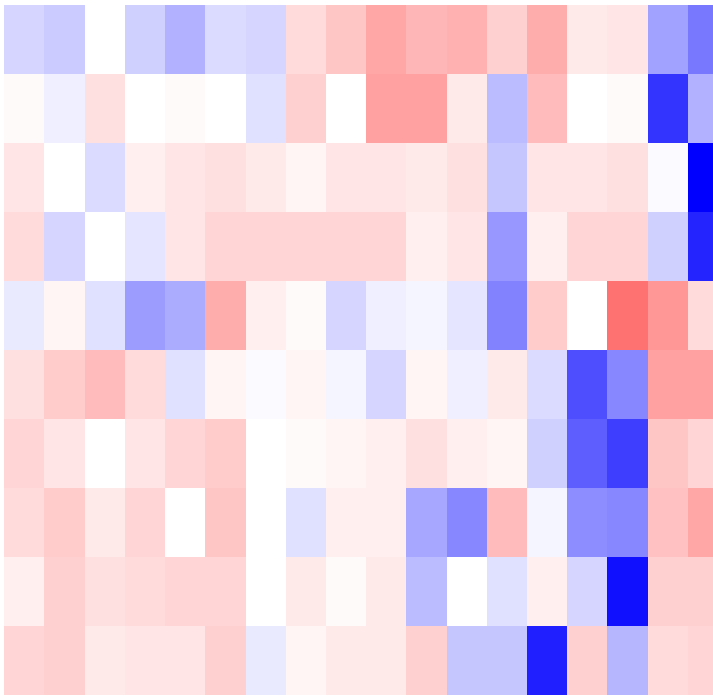

Solyc07g018400.2  
Solyc09g072730.1  
Solyc03g005790.2  
Solyc03g097770.2  
NCRNA\_4\_251  
Solyc04g007030.2  
Solyc02g067710.1  
Solyc05g009610.1  
Solyc01g066680.2  
Solyc11g008750.1

BCm3 Pi3 Pi2 ON3 BCm2 Pim1 ON1 ON2 Pi1 ONm1 BC3 BC2 BCm1 ONm3 ONm2 BC1 Pim2 Pim3



### Color Key

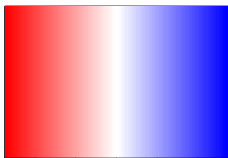

-2      0      1      2  
Value

### Pattern96 2 genes

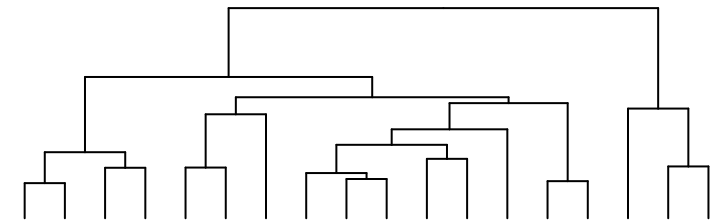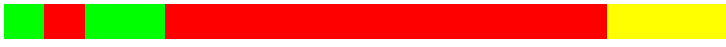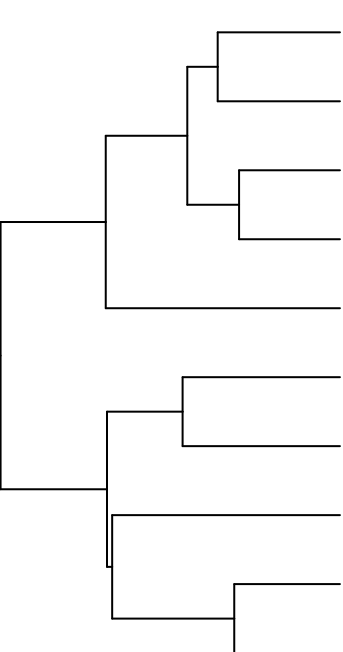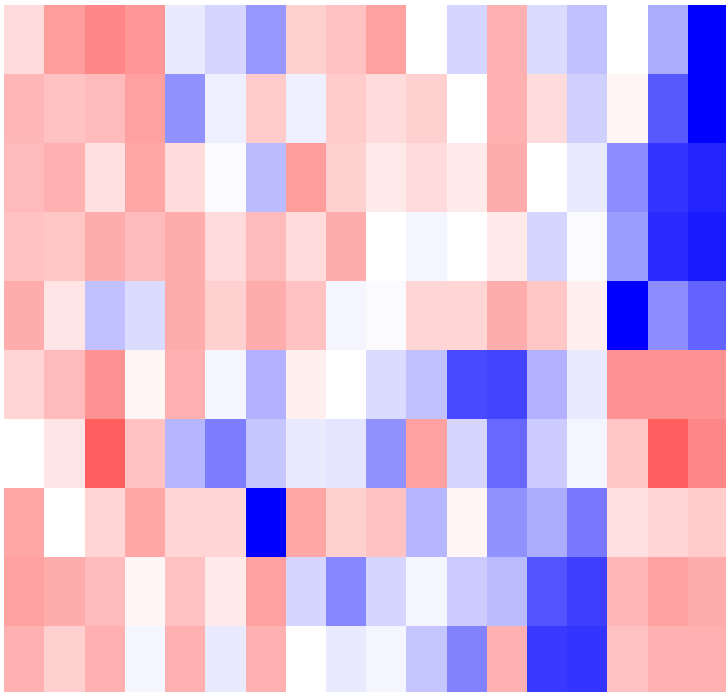

Solyc11g020640.1.  
Solyc10g018390.1.  
Solyc05g012350.2.  
Solyc10g049310.1.  
Solyc11g044600.1.  
Solyc08g082790.2.  
Solyc08g007200.2.  
Solyc05g046360.2.  
Solyc12g042670.1.  
Solyc05g045670.2.

ON3  
ONm3  
ON1  
ON2  
Pim1  
Pi3  
BC1  
Pi1  
Pim3  
BC3  
Pi2  
BC2  
ONm2  
Pim2  
ONm1  
BCm3  
BCm1  
BCm2

### Color Key

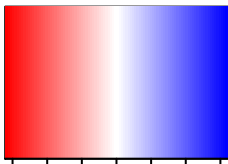

-3 -1 1 2 3  
Value

### Pattern125 2 genes

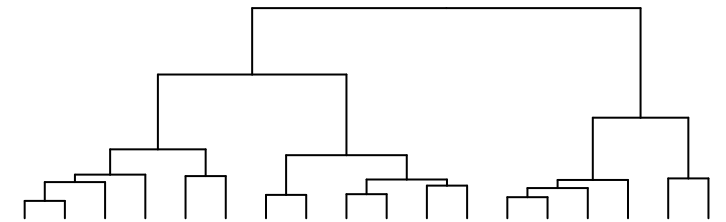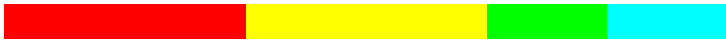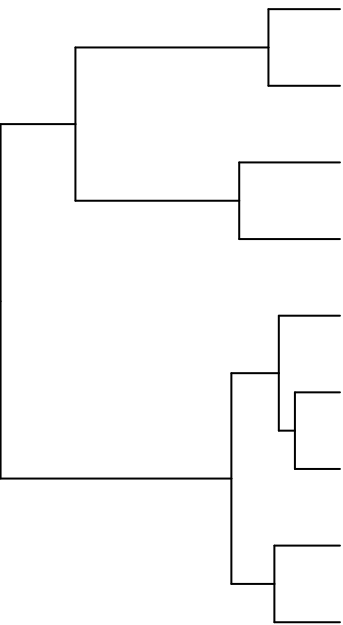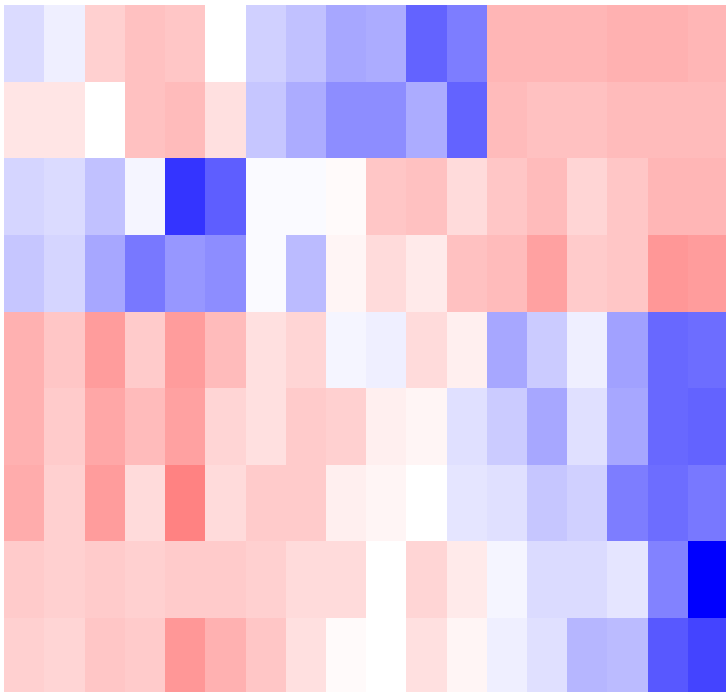

Solyc06g005680.2  
Solyc06g051680.1  
Solyc04g080720.2  
Solyc06g063060.2  
Solyc02g087410.2  
Solyc05g015640.2  
Solyc01g100950.2  
Solyc09g010530.2  
Solyc10g005960.1

BC2 BCm3 BCm1 BCm2 BC1 BC3 ONm3 ON3 ON2 ONm1 ON1 ONm2 Pi1 Pi3 Pi2 Pim1 Pim3 Pim2

### Color Key

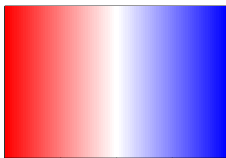

-2 0 2  
Value

### Pattern182 2 genes

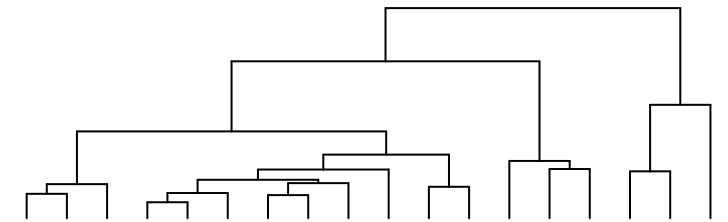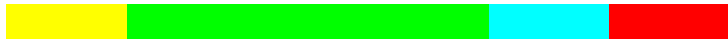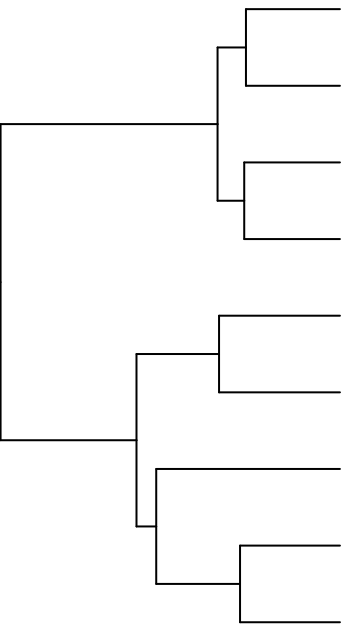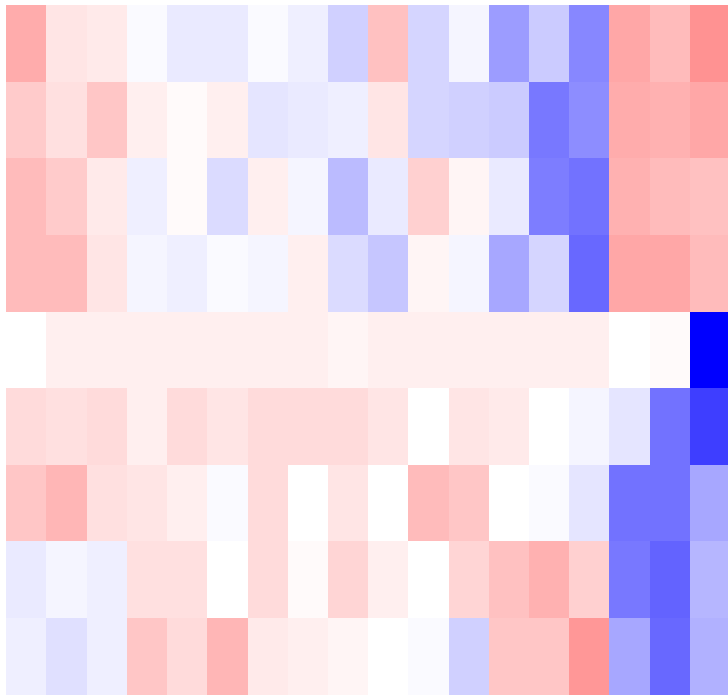

BCm1 BCm2 BCm3 Pim2 Pi3 ON2 ON3 Pi2 Pim3 ON1 Pi1 Pim1 ONm3 ONm1 ONm2 BC2 BC3 BC1

Solyc03g117340.1.  
Solyc03g080100.2.  
Solyc08g065420.2.  
Solyc03g093380.1.  
Solyc01g079930.1.  
Solyc12g010990.1.  
Solyc12g006310.1.  
Solyc04g011530.2.  
Solyc01g008190.2.



### Color Key

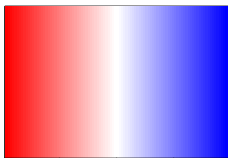

-2 0 2  
Value

### Pattern68 2 genes

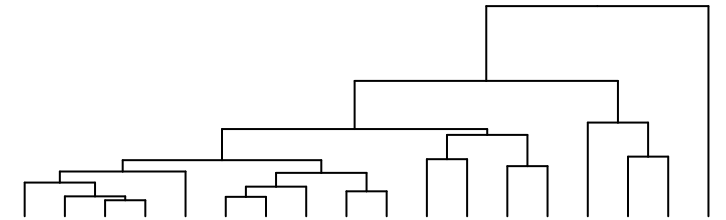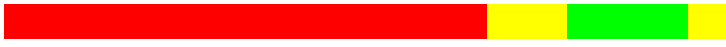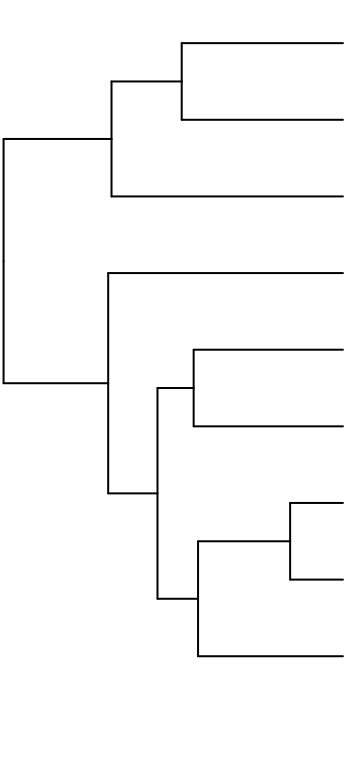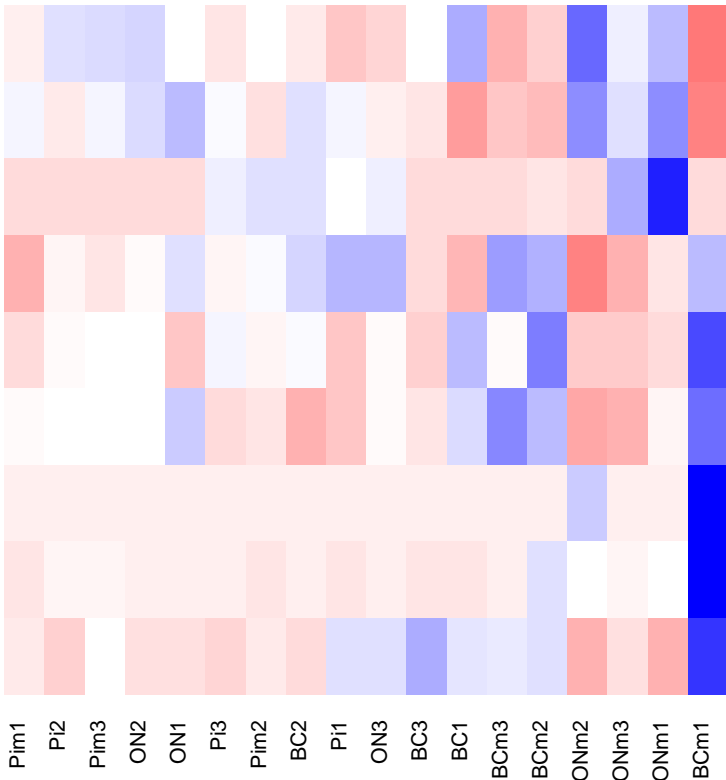

Solyc02g090710.2  
Solyc05g007800.2  
NCRNA\_5\_110  
Solyc02g065510.1  
Solyc09g075880.2  
Solyc04g077830.2  
Solyc08g069130.1  
Solyc09g065800.2  
Solyc03g082700.2

Pim1 Pim2 Pim3 ON2 ON1 Pim3 Pim2 BC2 Pim1 ON3 BC3 BC1 BCm3 BCm2 ONm2 ONm3 ONm1 BCm1

### Color Key

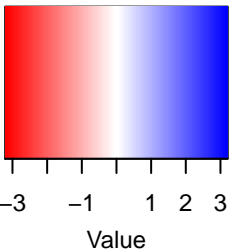

### Pattern100 2 genes

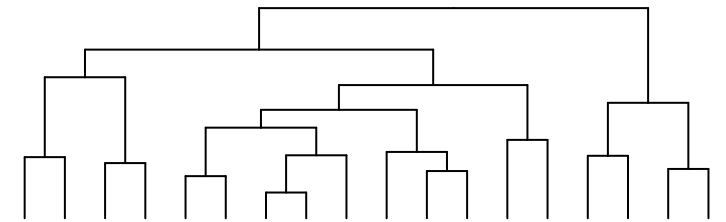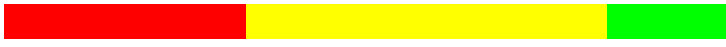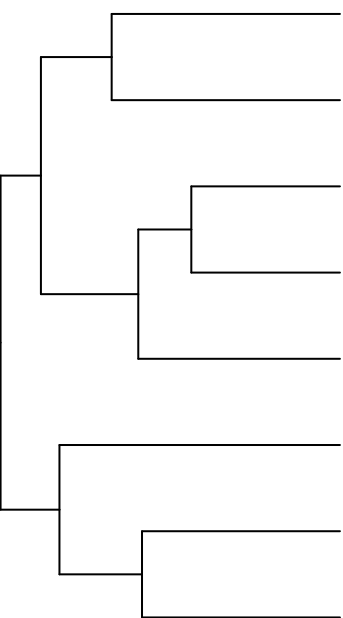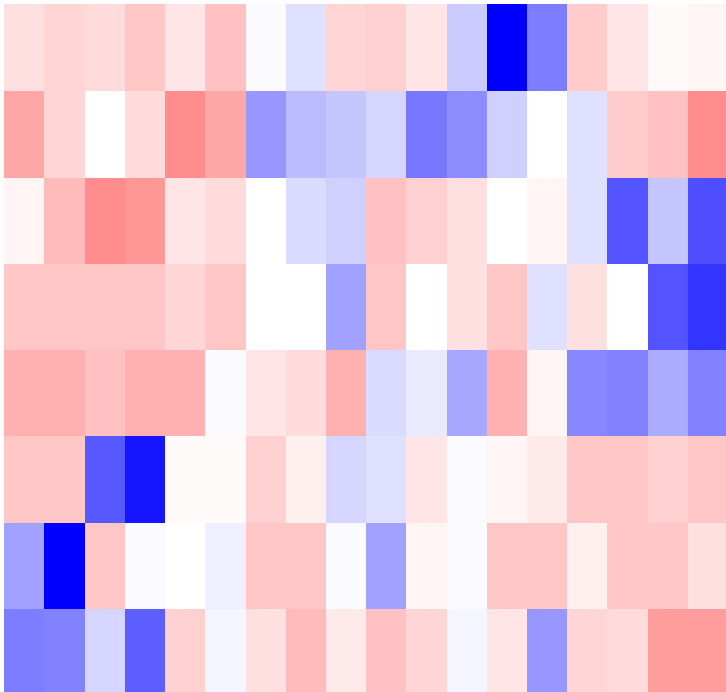

BC1 ONm1 ONm2 BC2 ONm3 BC3 P1m2 P13 BCm3 P11 P1m1 P1m3 BCm1 P12 BCm2 ON1 ON2 ON3

Solyc09g007660.1  
Solyc04g077170.2  
NCRNA\_7\_237  
Solyc05g018680.1  
Solyc12g005500.1  
Solyc10g017630.1  
NCRNA\_1\_428  
Solyc01g017320.1

### Color Key

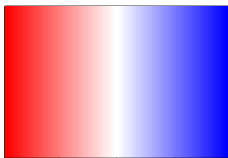

-2 0 2  
Value

### Pattern108 2 genes

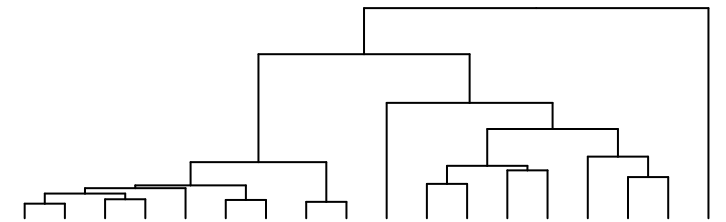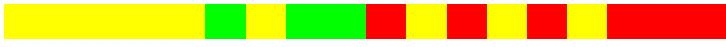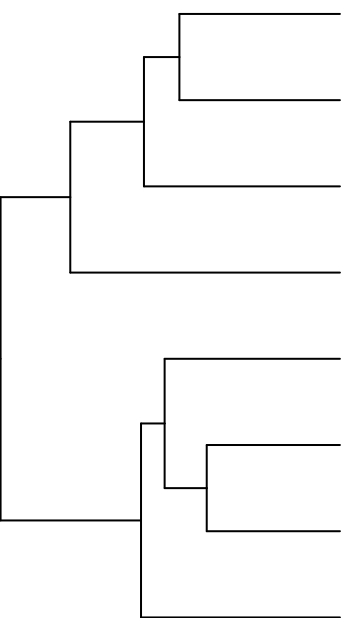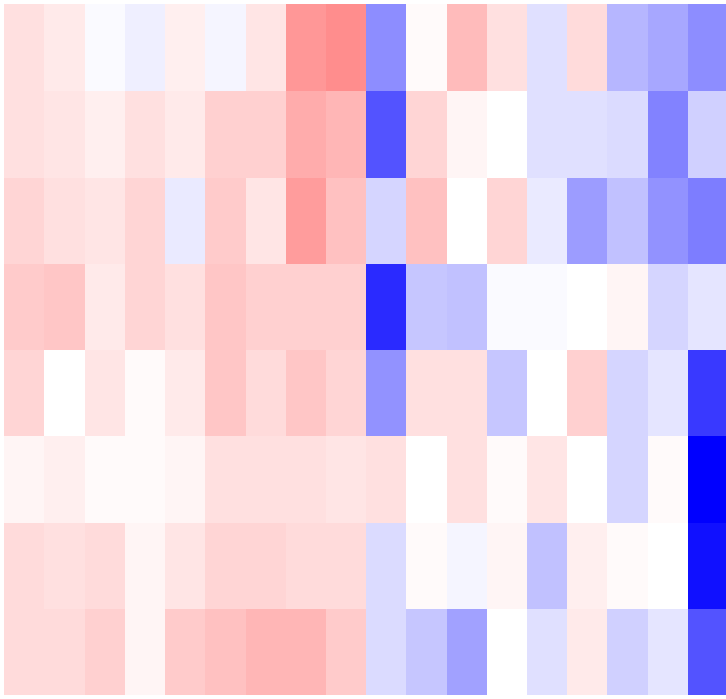

Solyc09g098550.2  
Solyc07g007660.1  
Solyc02g088180.2  
Solyc10g085890.1  
Solyc06g035480.2  
Solyc02g068880.1  
Solyc08g077900.2  
Solyc10g083460.1

ONm3 Pi2 ONm1 ONm2 BCm2 ON1 BCm3 ON2 ON3 BC2 BCm1 Pim1 Pi3 BC3 Pim3 Pim2 BC1

### Color Key

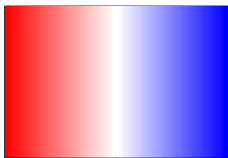

-2 0 2  
Value

### Pattern165 2 genes

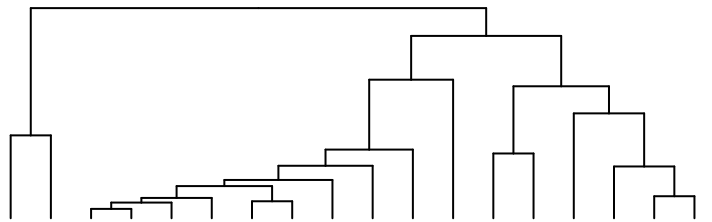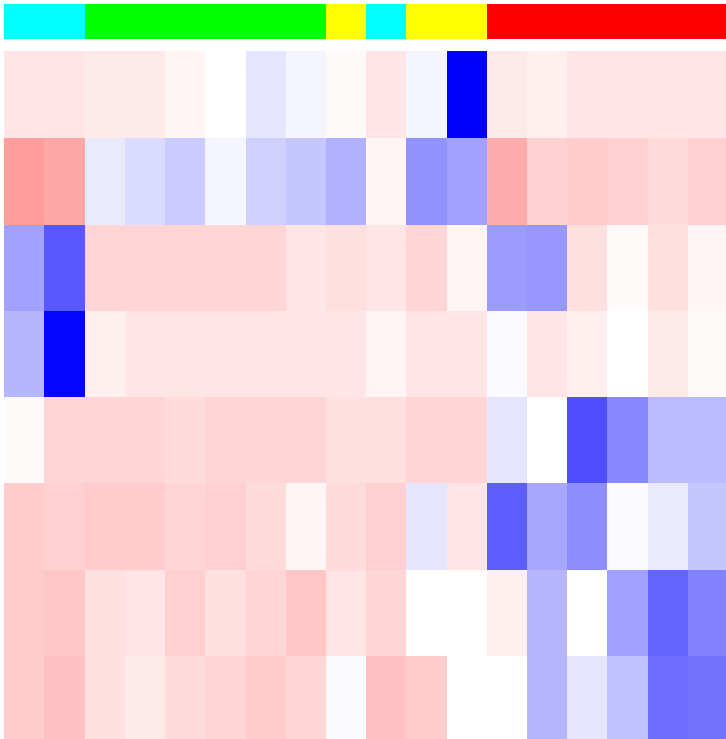

Solyc12g062500.1  
Solyc03g112200.1  
Solyc06g065050.1  
Solyc02g079490.2  
Solyc08g080530.1  
Solyc02g081370.2  
Solyc03g116190.1  
Solyc09g075920.1

Pim2 Pim3 ON2 ONm3 ONm2 ON3 ONm1 ON1 BCm2 Pim1 BCm3 BCm1 PI3 BC1 PI1 PI2 BC2 BC3



### Color Key

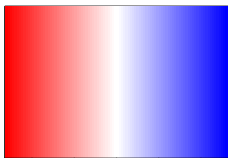

-2 0 1 2  
Value

### Pattern197 2 genes

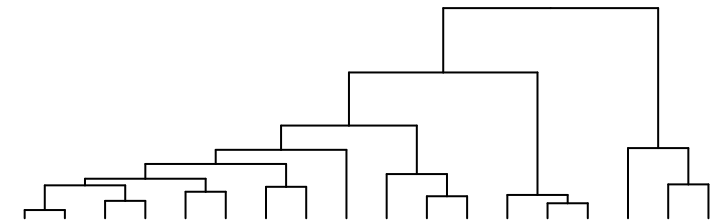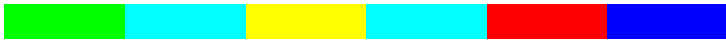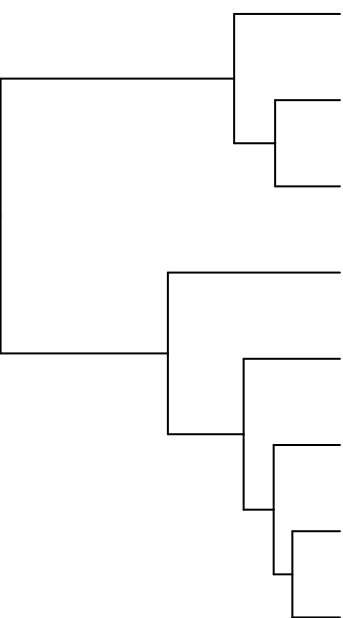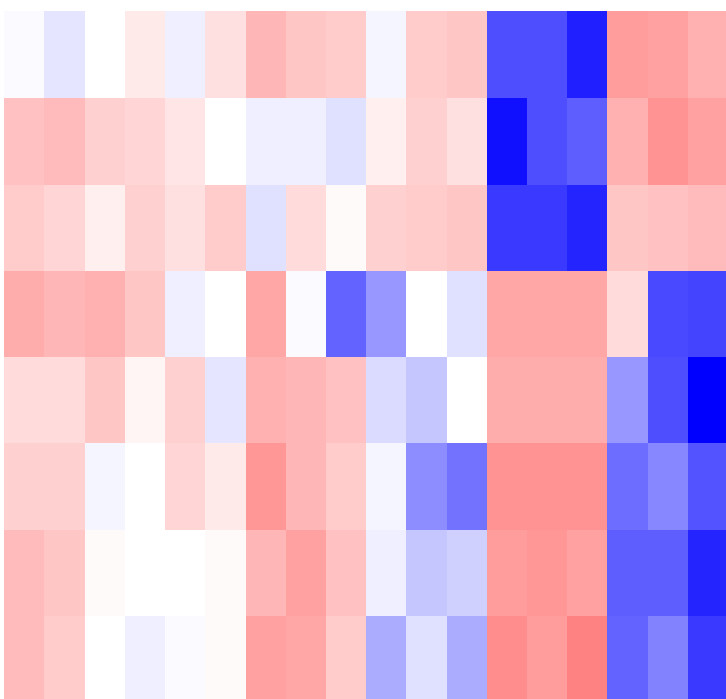

ON1 ON2 ON3 Pi2 ONm3 ONm1 BCm1 BCm3 BCm2 Pi1 ONm2 Pi3 BC2 BC3 BC1 Pim1 Pim2 Pim3

Solyc02g089730.1.  
Solyc12g096580.1.  
Solyc12g010570.1.  
Solyc12g088170.1.  
Solyc05g011890.1.  
Solyc02g072550.1.  
Solyc06g073180.2.  
Solyc01g106790.2.

### Color Key

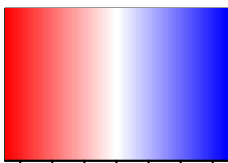

-3 -1 1 3  
Value

### Pattern72 2 genes

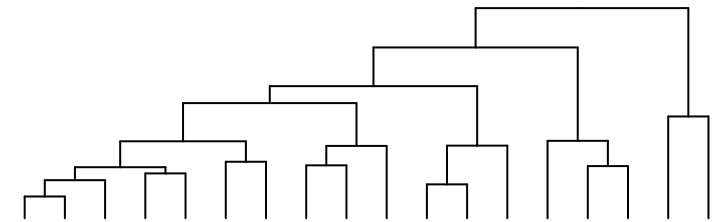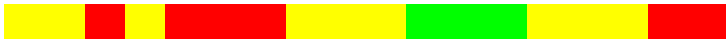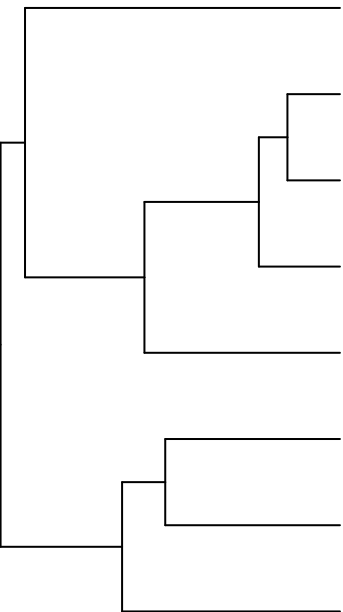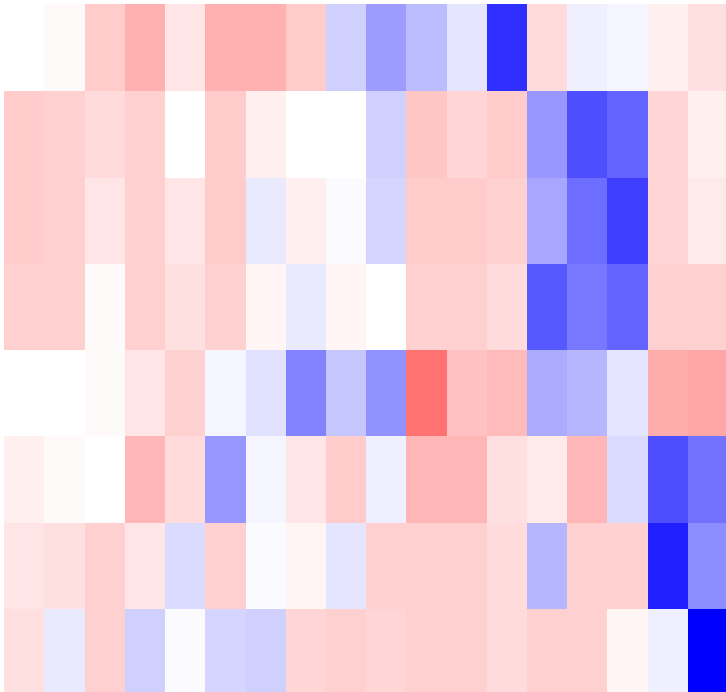

BCm2 Pim1 ON2 Pim1 ON3 BC2 BC1 Pim2 BCm3 Pim3 ONm2 ONm1 ONm3 Pi3 Pi2 BCm1 BC3 ON1

Solyc04g014980.1  
Solyc08g067940.2  
Solyc07g054310.1  
Solyc06g074020.2  
Solyc07g063490.2  
Solyc06g005270.1  
Solyc01g006460.1  
Solyc12g040780.1

### Color Key

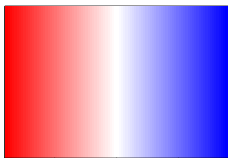

-2 0 2  
Value

### Pattern80 2 genes

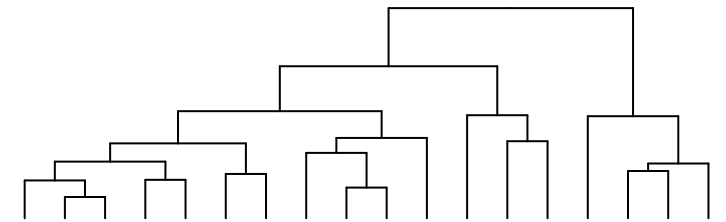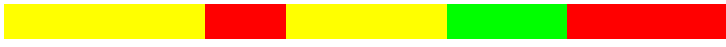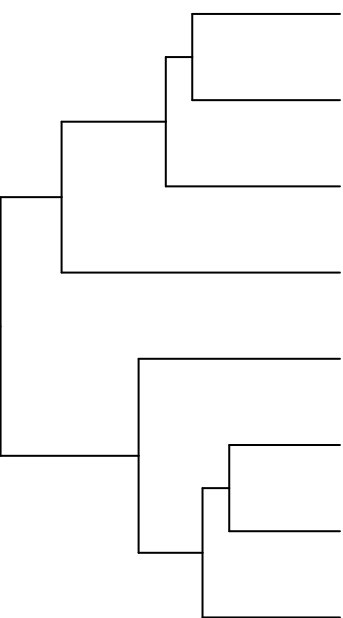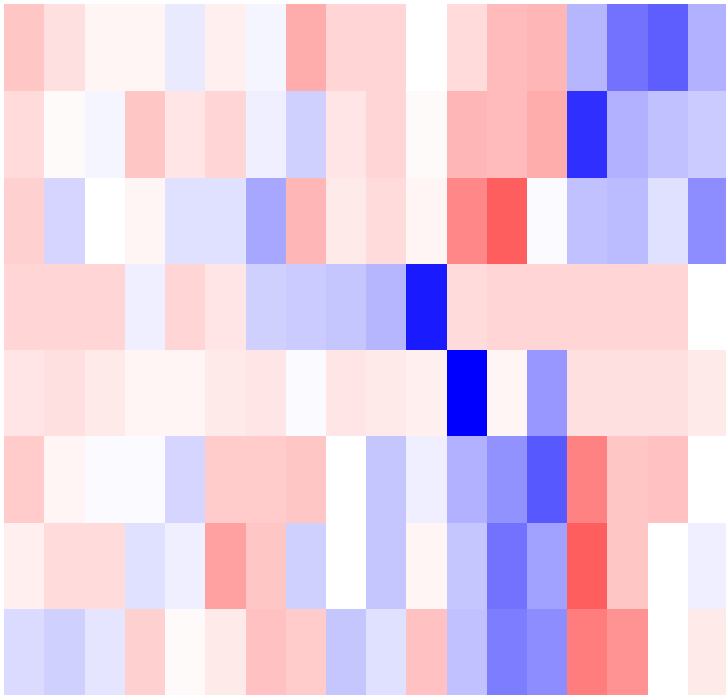

Solyc02g043810.2  
Solyc03g082510.1  
Solyc10g006300.2  
Solyc01g095250.1  
Solyc04g080660.2  
Solyc02g090180.2  
Solyc08g066700.2  
Solyc12g041920.1

ON3 ON1 BCm3 Pim3 Pim1 ONm3 ONm1 BCm1 Pim2 BCm2 ON2 Pi3 Pi2 Pi1 BC1 ONm2 BC3 BC2

### Color Key

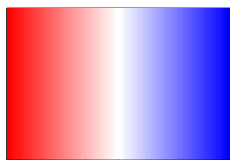

-3   -1   1   3  
Value

### Pattern90 2 genes

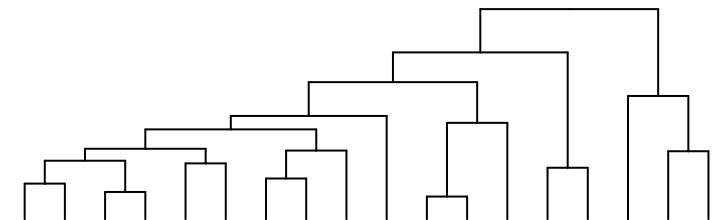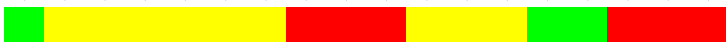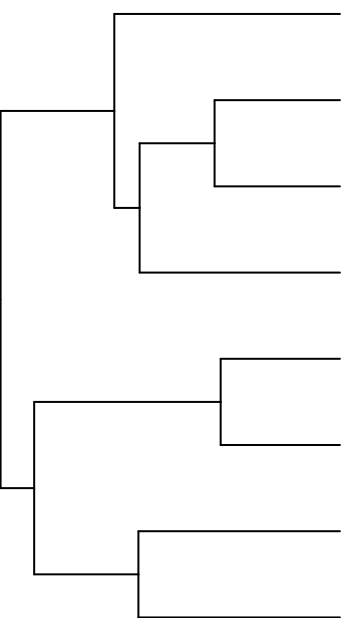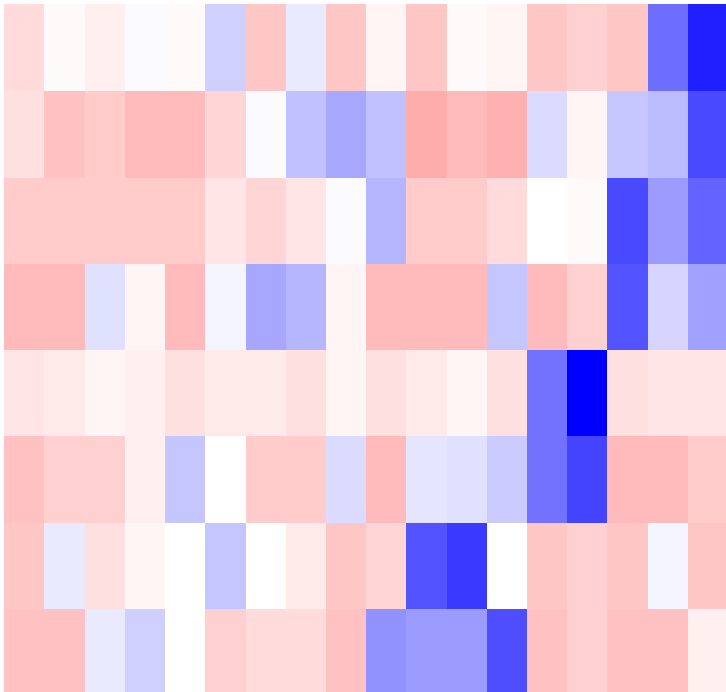

Solyc11g012980.1  
Solyc04g077330.2  
Solyc10g079380.1  
NCRNA\_6\_10  
Solyc01g090810.2  
Solyc03g116860.2  
Solyc02g065020.1  
Solyc01g014610.1

ONm1 BCm1 Pi3 BCm2 ON3 Pi1 ON2 Pim3 Pim1 BC3 Pi2 ON1 BCm3 ONm2 ONm3 BC1 BC2 Pim2

### Color Key

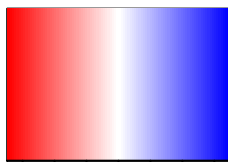

-3 -1 1 3  
Value

### Pattern187 2 genes

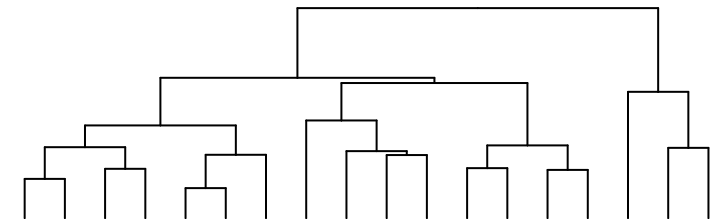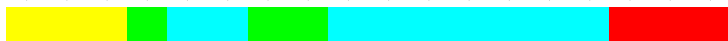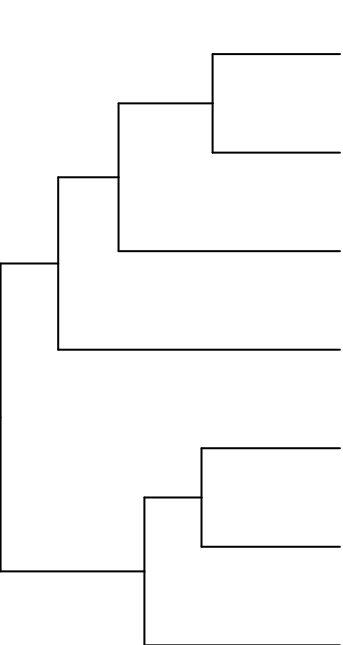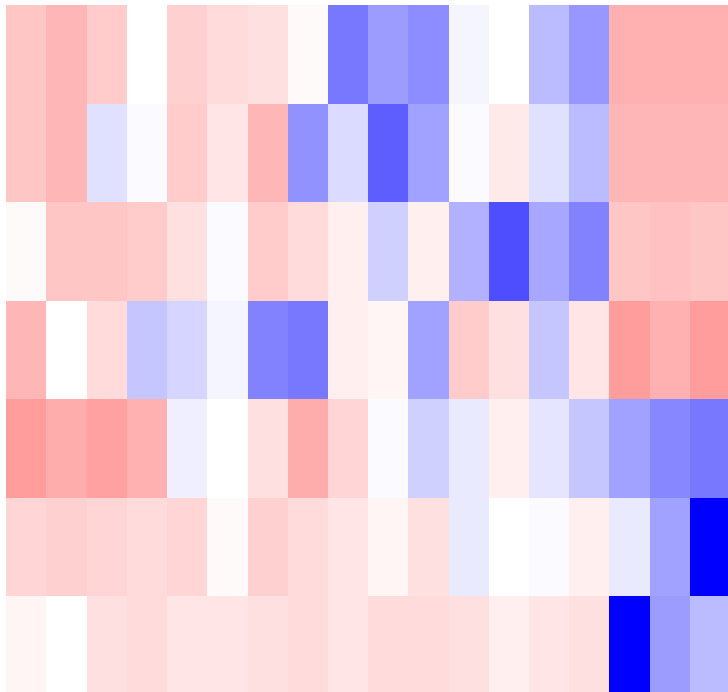

Solyc01g090800.  
Solyc08g078410.  
Solyc01g096320.  
Solyc09g072630.  
Solyc02g069350.  
Solyc12g043030.  
Solyc02g014220.

BCm2 BCm1 BCm3 ON2 ONm3 Pi1 ON3 ON1 ONm1 ONm2 Pi2 Pi3 Pim1 Pim2 Pim3 BC1 BC3 BC2

### Color Key

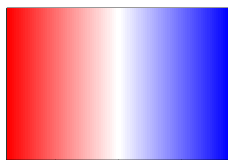

-2 0 2  
Value

### Pattern40 2 genes

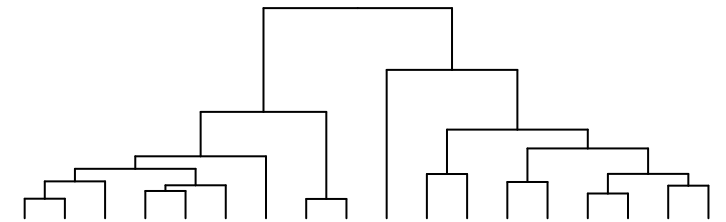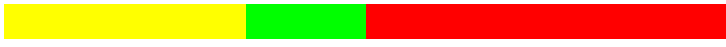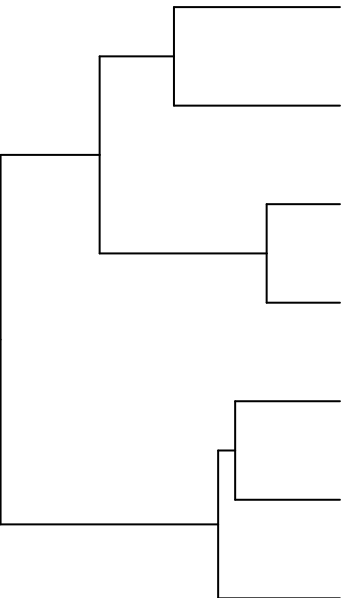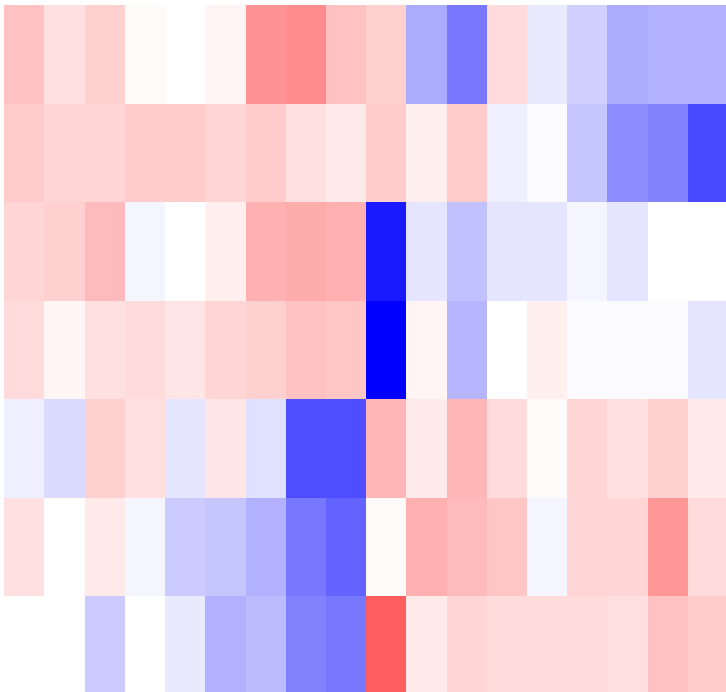

Solyc01g057850.  
Solyc07g019630.  
Solyc05g018060.  
Solyc03g026000.  
Solyc09g090360.  
Solyc04g071010.  
Solyc07g041210.

Pi2 ON2 Pi1 ON1 ON3 Pi3 Pim1 Pim2 Pim3 BCm1 BCm2 BC1 ONm2 ONm3 BCm3 ONm1 BC2 BC3

### Color Key

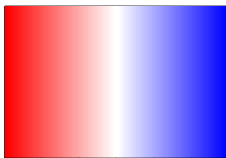

-2 0 1 2  
Value

### Pattern41 2 genes

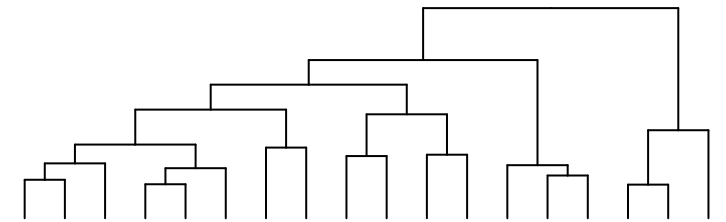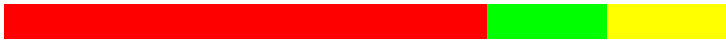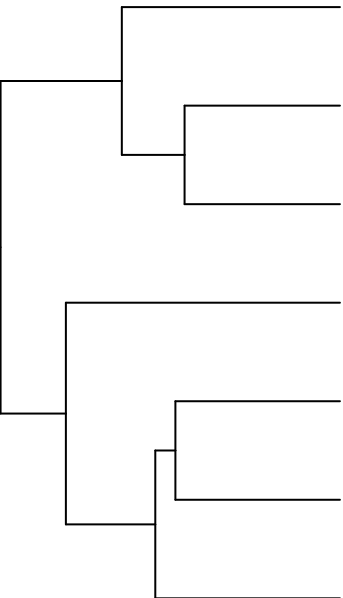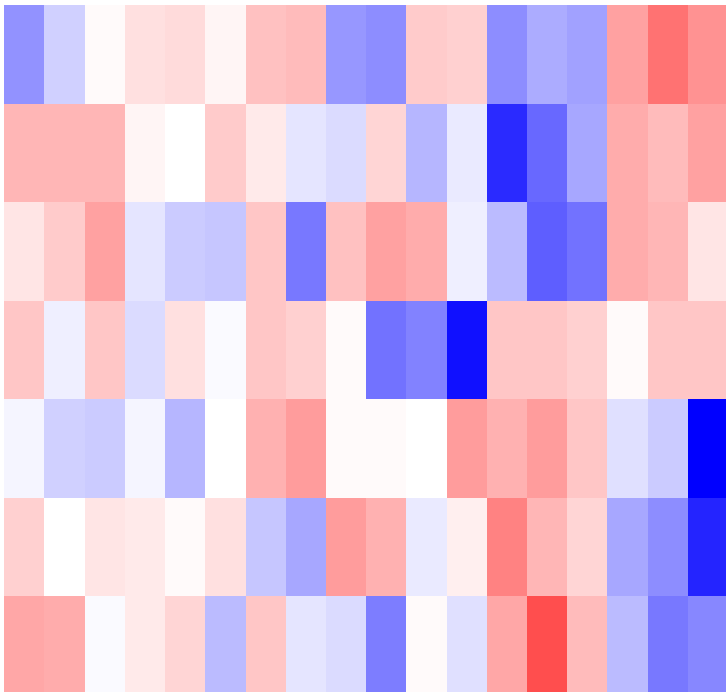

BC2 ONm2 BC3 ONm1 BCm2 Pim3 BCm3 ONm3 Pim1 BCm1 Pim2 BC1 Pi1 Pi2 Pi3 ON2 ON3 ON1

Solyc02g088710.  
Solyc01g105190.  
Solyc05g009280.  
Solyc07g054790.  
Solyc01g065620.  
Solyc01g099470.  
Solyc07g065400.

### Color Key

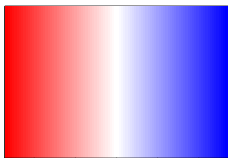

-2 0 1 2  
Value

### Pattern50 2 genes

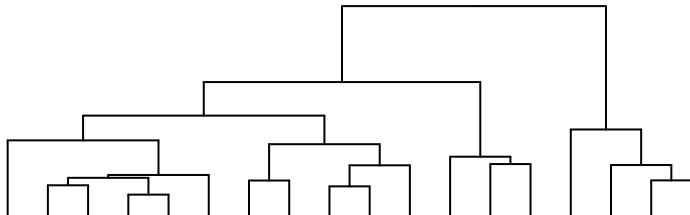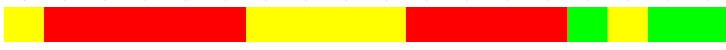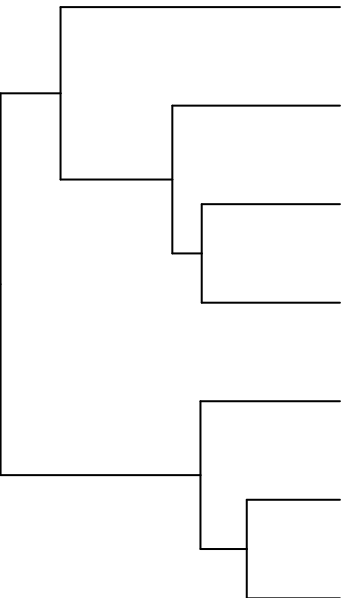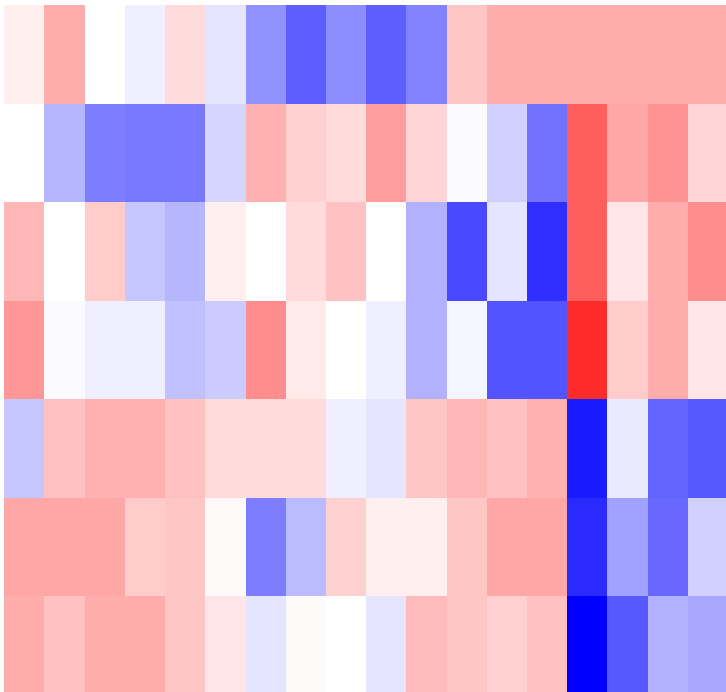

Solyc01g088220.  
Solyc01g005040.  
Solyc01g080190.  
Solyc10g044930.  
Solyc04g016040.  
Solyc10g046940.  
Solyc07g052510.

ON3  
BCm1  
BC1  
BC3  
BCm2  
PI3  
Pim1  
Pim2  
Pim3  
ON2  
BCm3  
PI1  
PI2  
BC2  
ONm2  
ON1  
ONm1  
ONm3





### Color Key

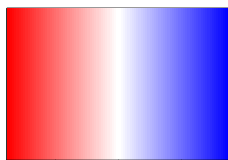

-2 0 2  
Value

### Pattern63 2 genes

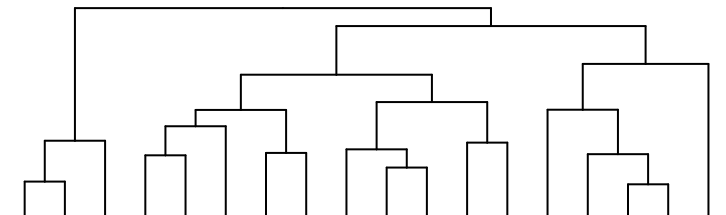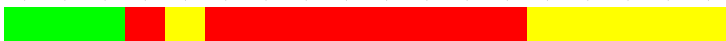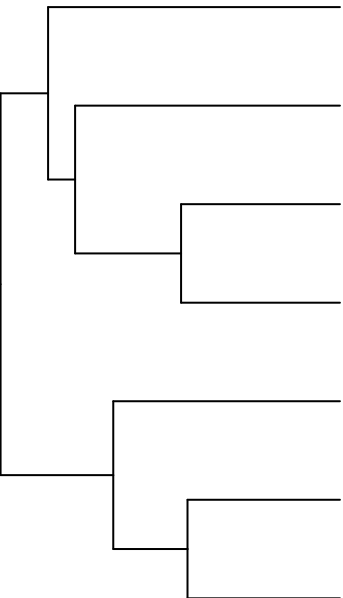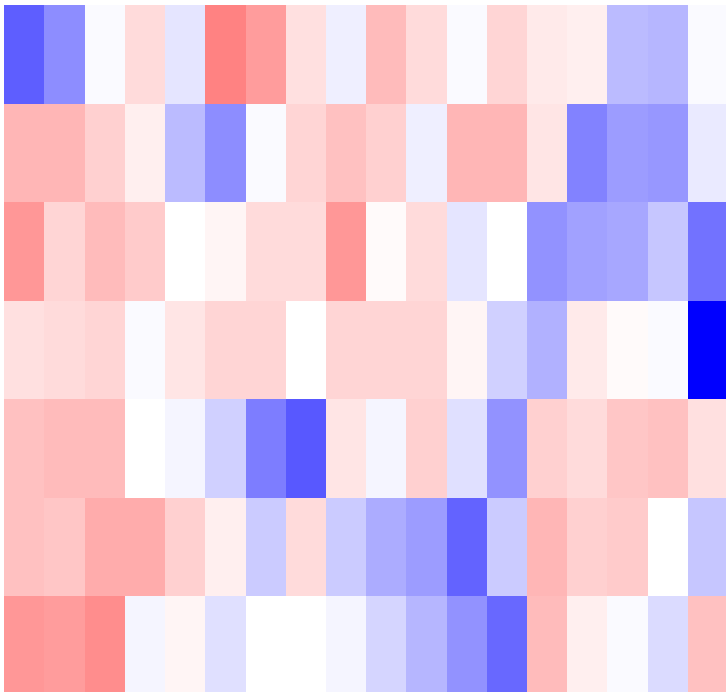

Solyc07g063290.  
Solyc12g016200.  
Solyc04g056450.  
Solyc03g065200.  
Solyc04g012100.  
Solyc08g068640.  
Solyc10g008580.

### Color Key

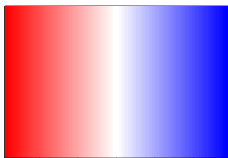

-2 0 1 2  
Value

### Pattern66 2 genes

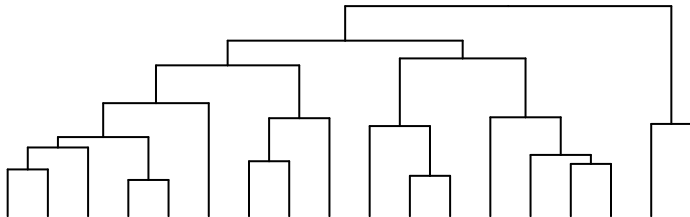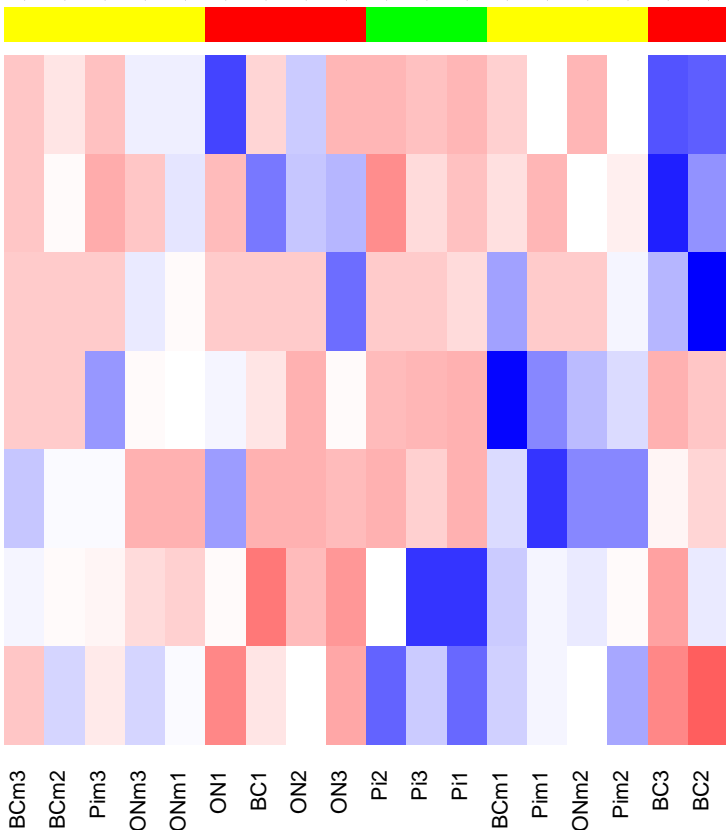

Solyc11g030660.  
Solyc02g084900.  
Solyc10g062050.  
Solyc05g007080.  
Solyc02g005530.  
Solyc06g083280.  
Solyc05g009840.

BCm3 BCm2 Pim3 ONm3 ONm1 ON1 BC1 ON2 ON3 Pi2 Pi3 Pi1 BCm1 Pim1 ONm2 Pim2 BC3 BC2

### Color Key

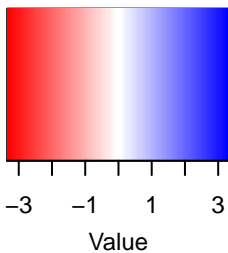

### Pattern70 2 genes

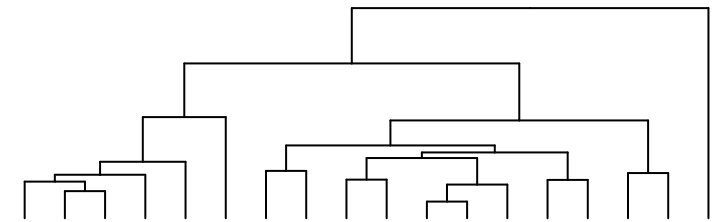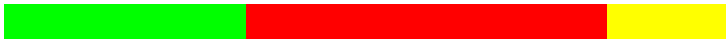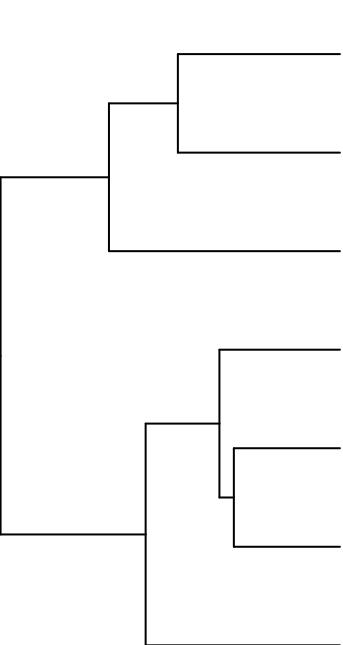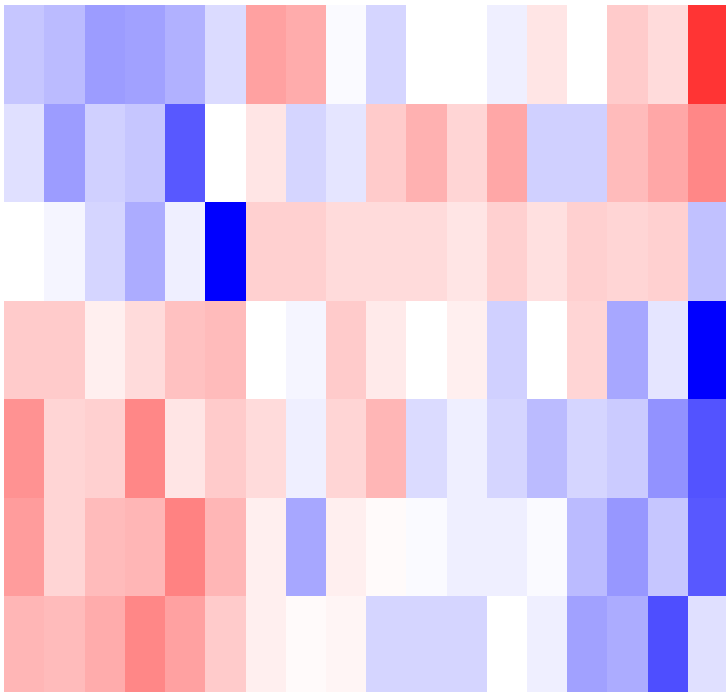

Solyc04g078400.  
Solyc06g072840.  
Solyc04g050820.  
Solyc10g079700.  
Solyc10g079050.  
Solyc02g011680.  
Solyc01g090510.

### Color Key

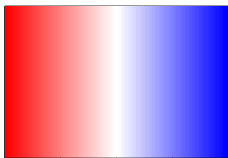

-2 0 2  
Value

### Pattern102 2 genes

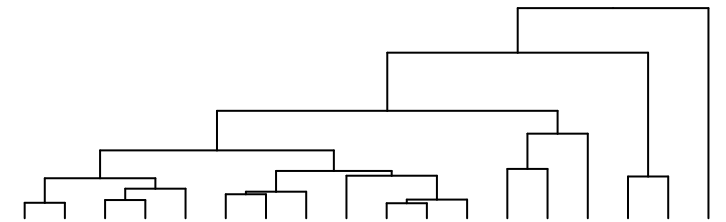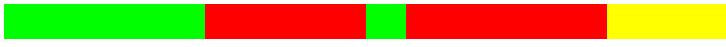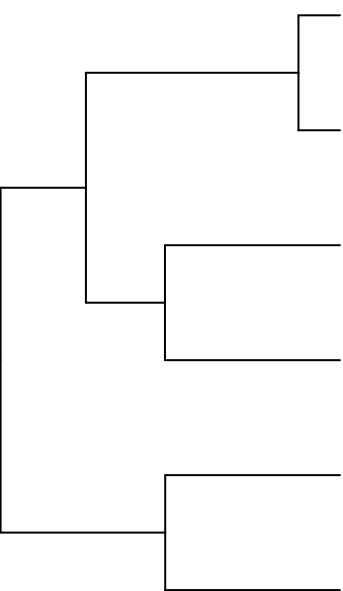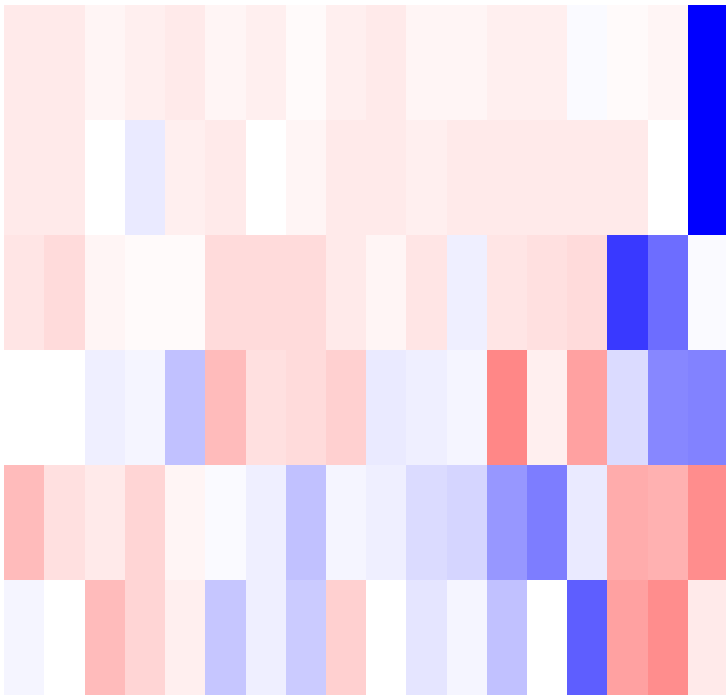

Solyc07g061720  
Solyc11g072980  
Solyc01g110180  
Solyc04g078120  
Solyc02g089630  
Solyc01g080400

Pim3 ON1 Pim2 BC3 Pim3 BC2 ON2 ONm3 Pim1 ONm1 ONm2 BC1 BCm3 BCm2 BCm1

### Color Key

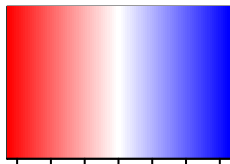

-3 -1 1 2 3  
Value

### Pattern195 2 genes

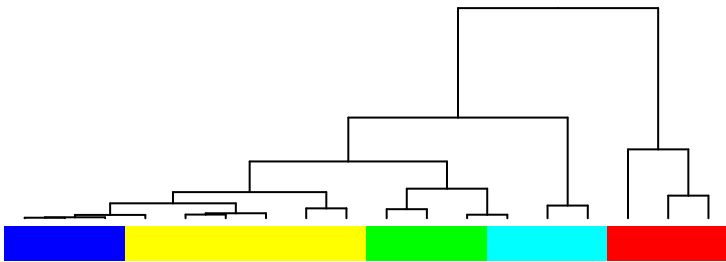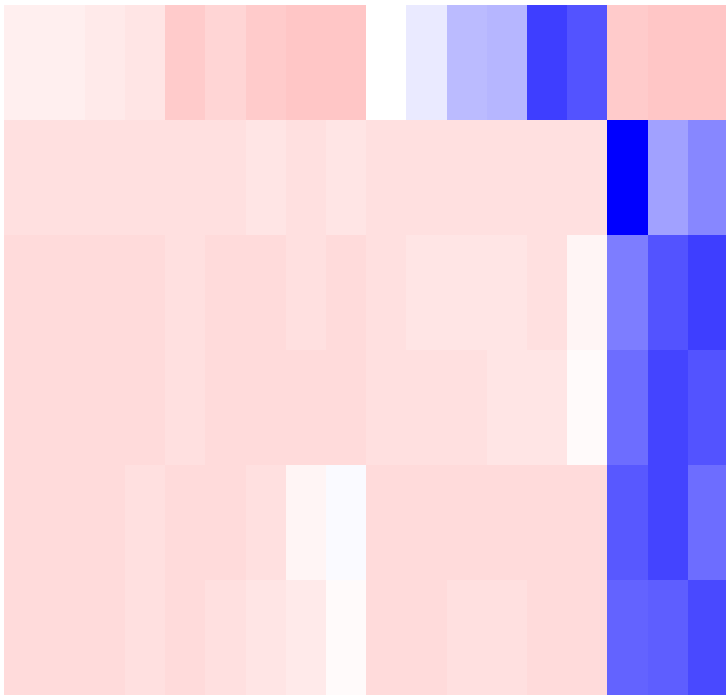

Solyc01g081160

Solyc04g083140

Solyc08g066880

Solyc08g066890

Solyc01g096720

Solyc06g009290

Pim3 Pim2 Pim1 Pi3 BCm3 BCm2 Pi2 Pi1 BCm1 ON2 ON1 ON3 ONm3 ONm2 ONm1 BC1 BC2 BC3

### Color Key

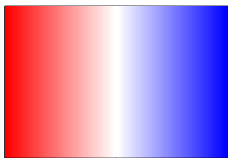

-2 0 2  
Value

### Pattern37 2 genes

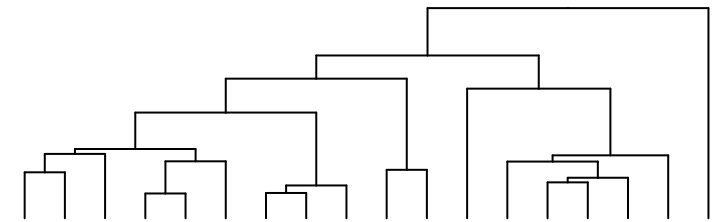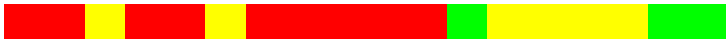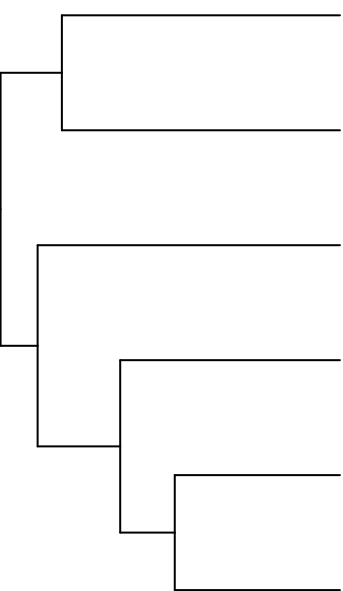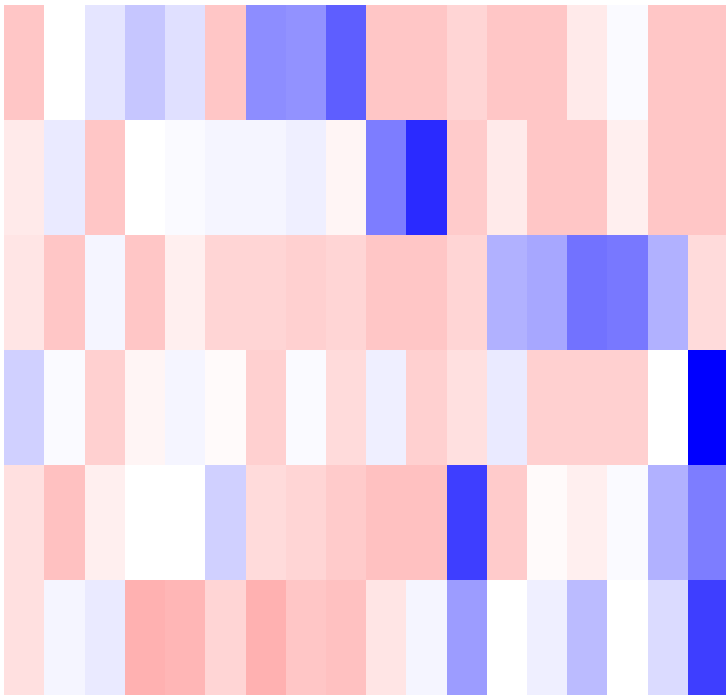

Solyc02g090730  
Solyc07g021240  
Solyc12g044390  
Solyc11g028310  
Solyc03g033750  
NCRNA\_9\_282

ON1 BC3 ONm1 BC2 BCm2 ONm3 ON3 BCm3 ON2 BC1 BCm1 Pi1 Pim1 Pim2 ONm2 Pim3 Pi3 Pi2

### Color Key

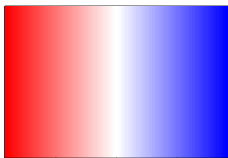

-2 0 2  
Value

### Pattern73 2 genes

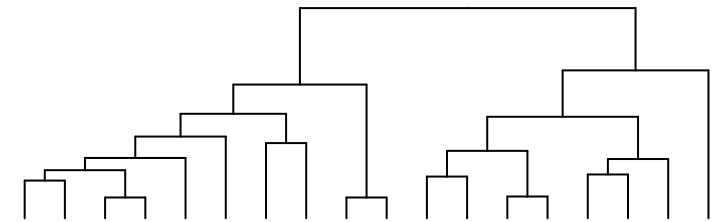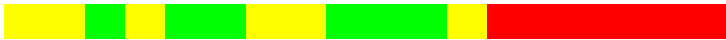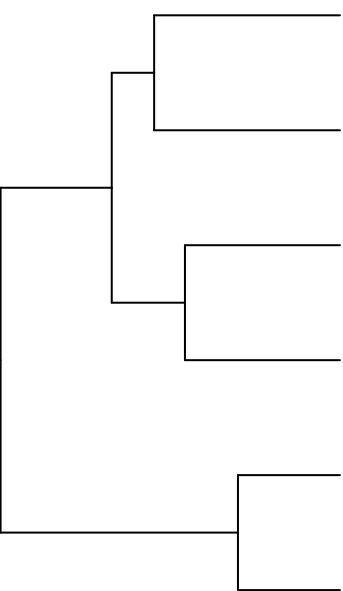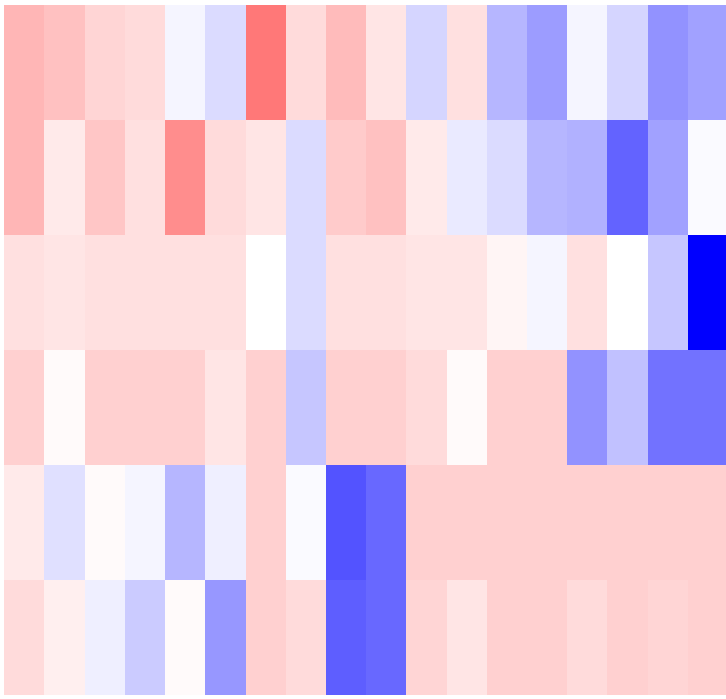

PI2 BCm2 Pim2 PI3 ONm1 Pim3 BCm1 PI1 Pim1 ONm2 ONm3 BCm3 ON3 BC3 ON2 BC1 BC2 ON1

Solyc07g007650  
Solyc09g015440  
NCRNA\_9\_295  
Solyc09g075660  
Solyc06g075990  
Solyc03g118050



### Color Key

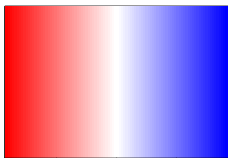

-2 0 2  
Value

### Pattern97 2 genes

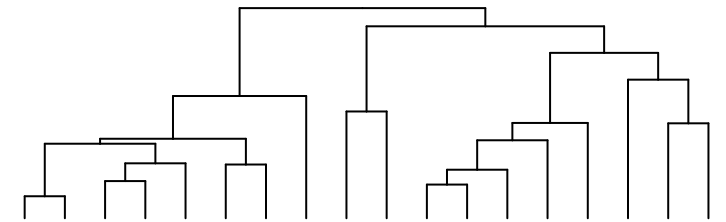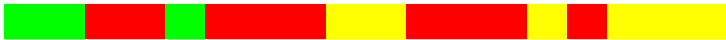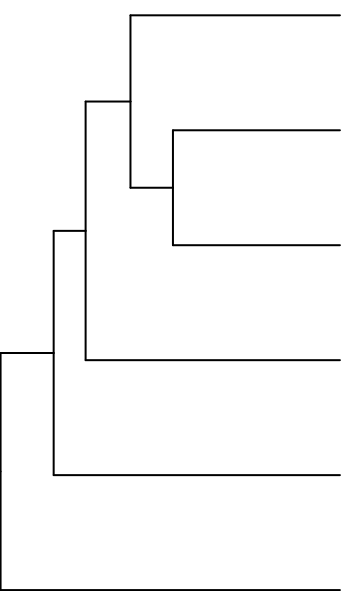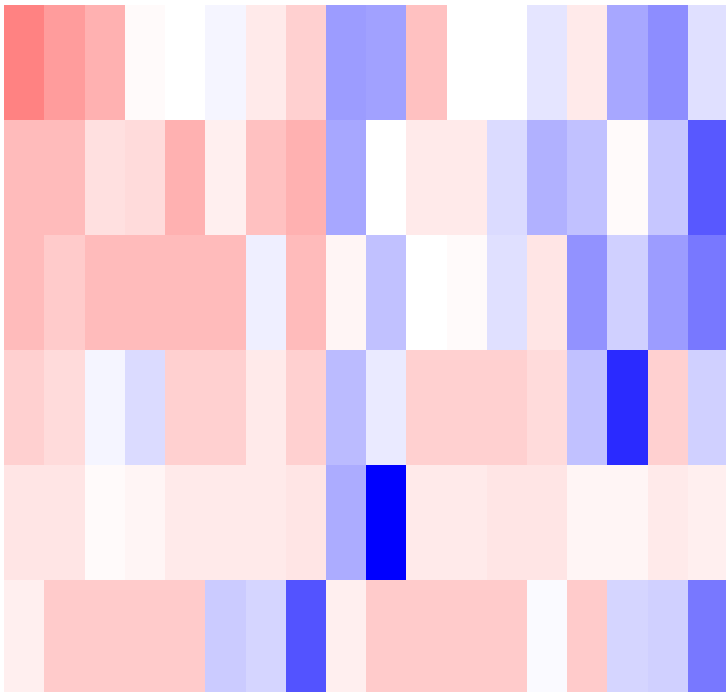

ON1 ON2 BC1 ONm2 ON3 Pi2 ONm3 BC3 Pim1 BCm1 ONm1 Pi1 BC2 BCm3 Pi3 Pim3 Pim2 BCm2

Solyc10g007030

Solyc01g079670

Solyc11g065970

Solyc09g082100

Solyc03g019820

Solyc07g063090

### Color Key

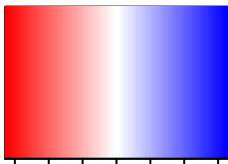

-3 -1 1 2 3  
Value

### Pattern104 2 genes

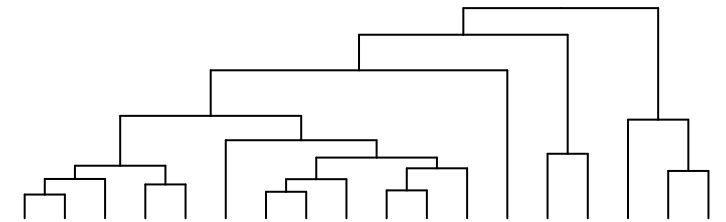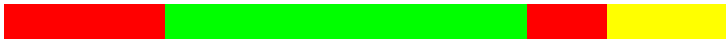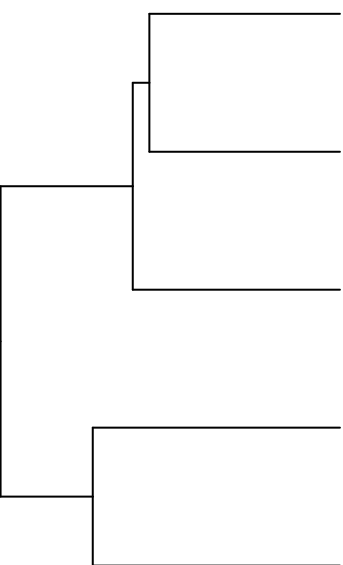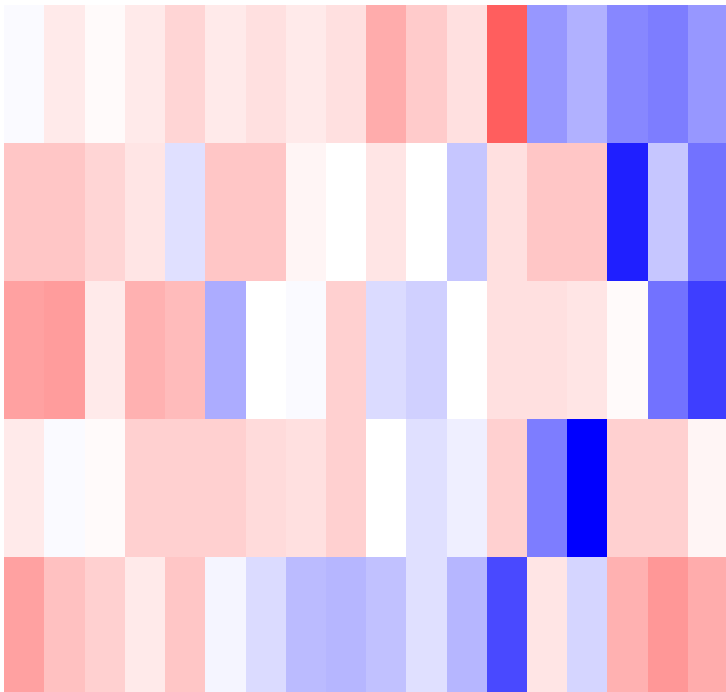

Solyc05g01297  
Solyc04g08097  
Solyc02g06722  
Solyc05g01380  
Solyc01g10779

ONm2 BC2 ONm3 BC3 ON3 Pim1 ON1 Pi3 Pi1 ON2 Pi2 Pim2 Pim3 ONm1 BC1 BCm1 BCm2 BCm3

### Color Key

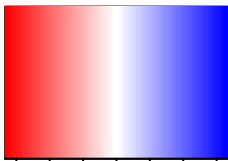

-3 -1 1 2 3  
Value

### Pattern111 2 genes

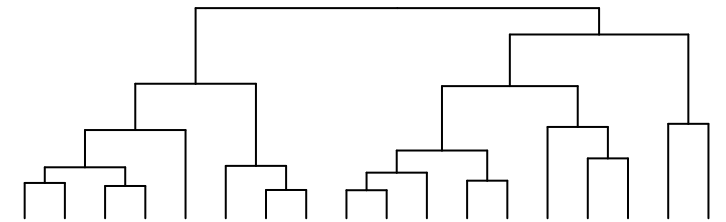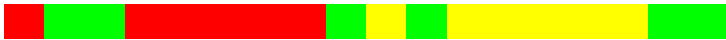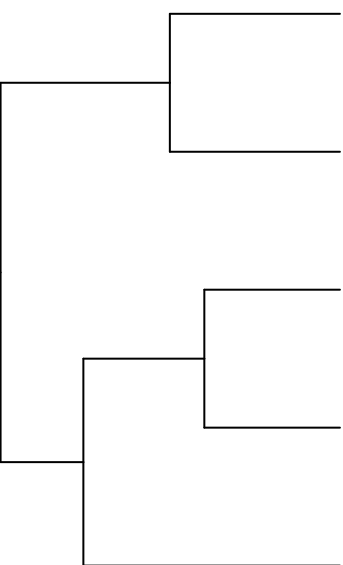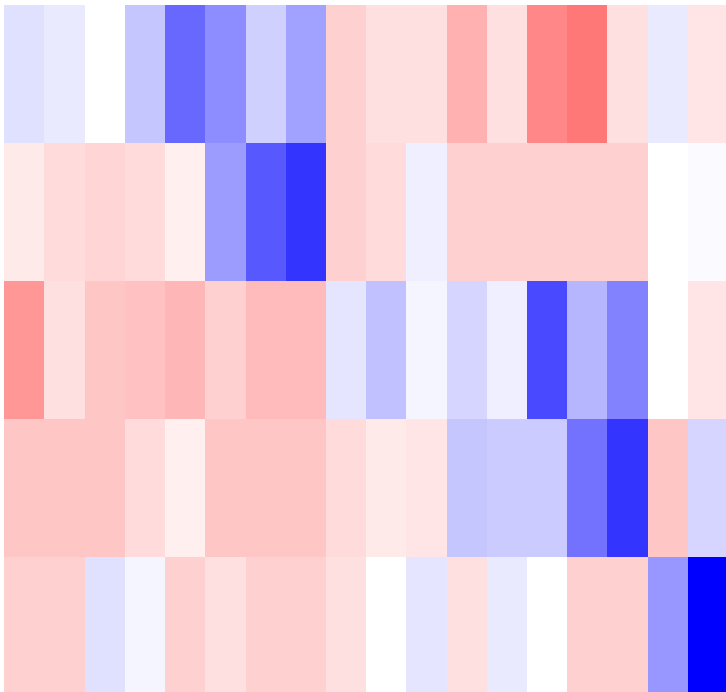

Solyc05g04639  
Solyc07g06515  
Solyc06g06510  
Solyc09g00916  
Solyc05g00547

Pim3 Pi3 ON2 Pim1 BC3 BC2 Pim2 BC1 ON1 ONm3 ON3 BCm2 BCm3 ONm1 BCm1 ONm2 Pi2 Pi1

### Color Key

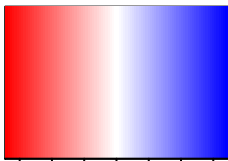

-3 -1 1 3  
Value

### Pattern34 2 genes

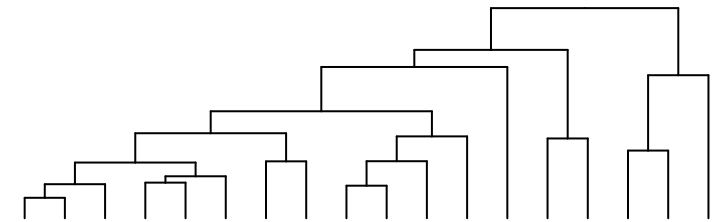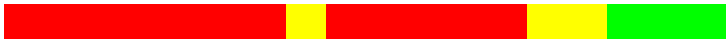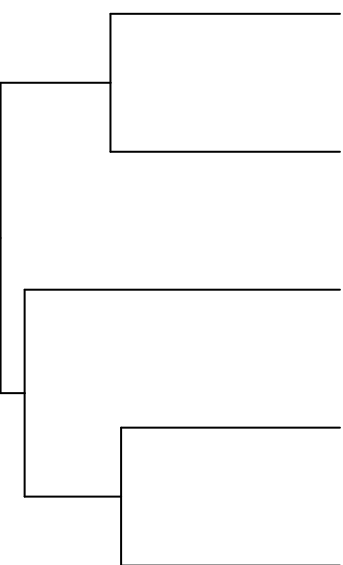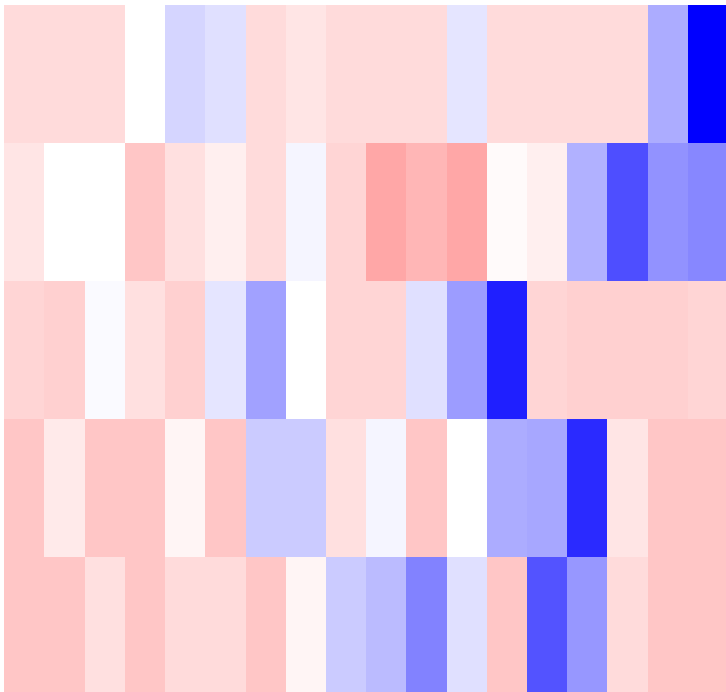

ON1 ON3 Pi3 BC3 BCm3 Pi1 BCm1 ONm3 BCm2 Pi2 BC2 ON2 BC1 ONm2 ONm1 Pim2 Pim3 Pim1

Solyc05g02369  
Solyc01g00513  
Solyc10g07932  
Solyc07g02514  
Solyc01g06020

### Color Key

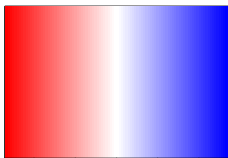

-2    0    1    2  
Value

### Pattern42 2 genes

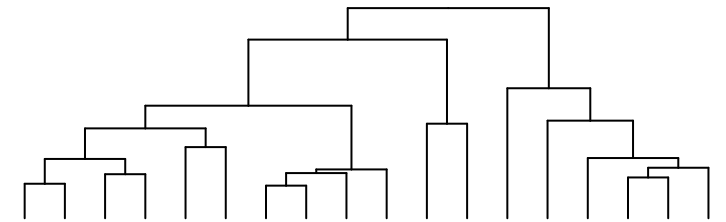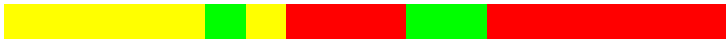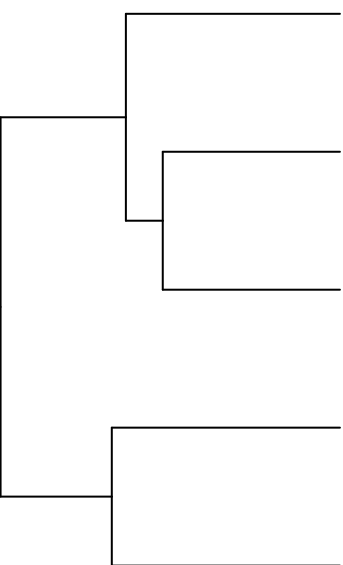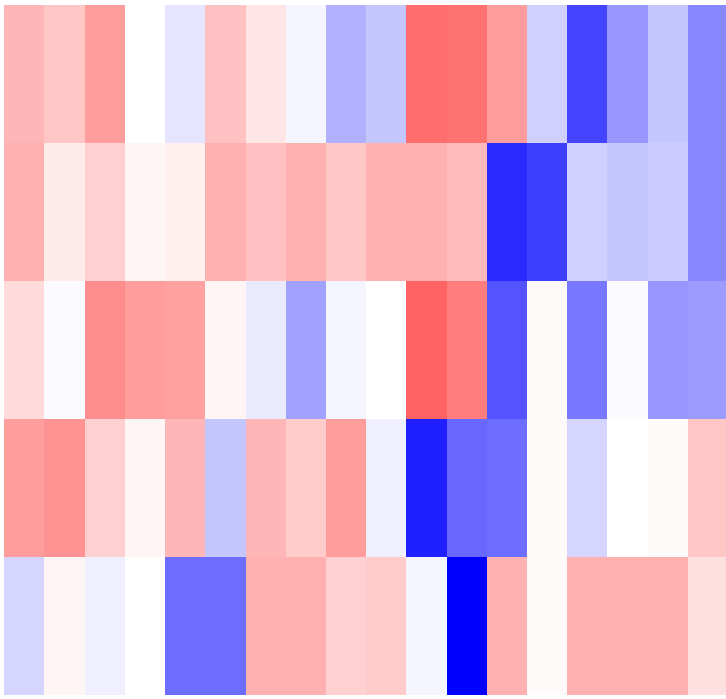

Solyc11g04514

Solyc04g05078

Solyc06g07541

Solyc05g05597

Solyc02g05552

ON1    Pim3    Pim2    ON2    Pim1    Pi3    ON3    BCm3    BCm2    ONm2    Pi2    Pi1    BCm1    BC2    BC1    ONm3    BC3    ONm1

### Color Key

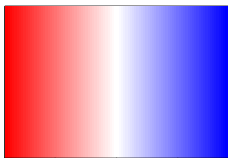

-2 0 2  
Value

### Pattern65 2 genes

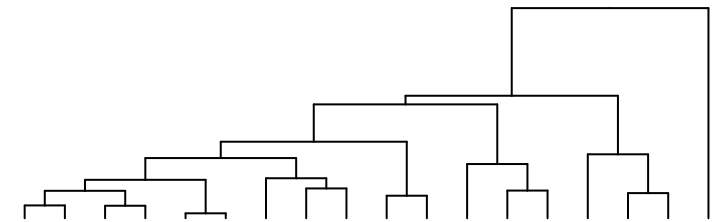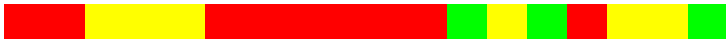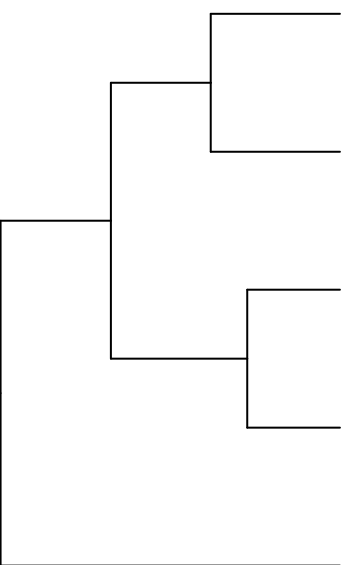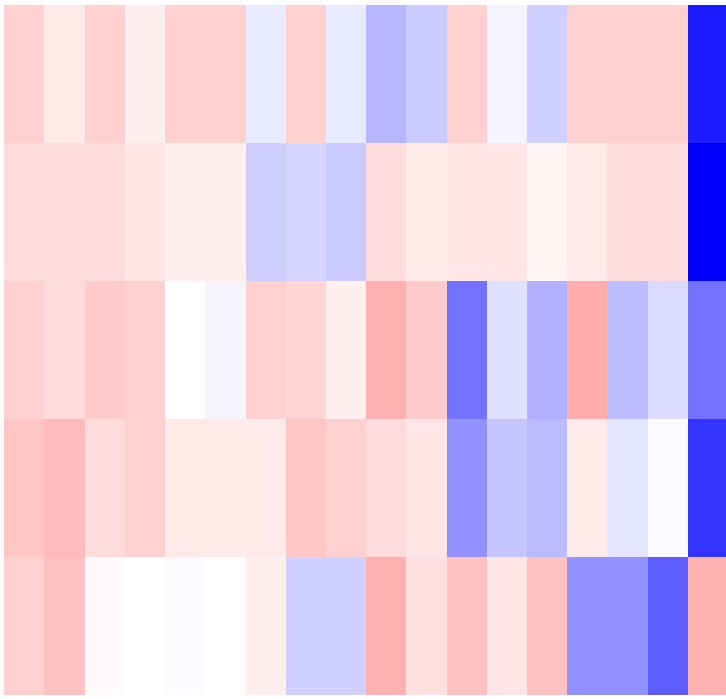

Solyc04g07873

Solyc09g01020

Solyc12g08792

Solyc07g04553

Solyc01g06561

BC1 Pim3 ONm1 BCm3 BCm1 ON2 BC2 ON1 Pim1 ON3 Pim2 Pi1 ONm3 Pi3 BC3 BCm2 ONm2 Pi2

### Color Key

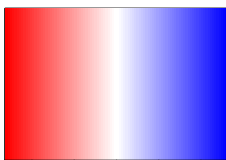

-2    0    1    2  
Value

### Pattern101 2 genes

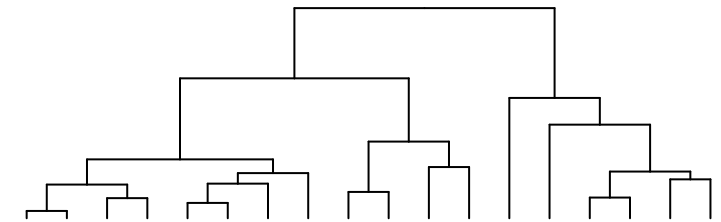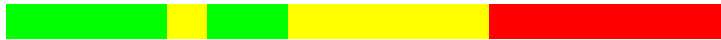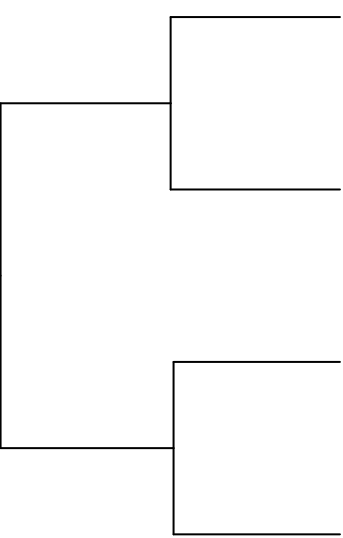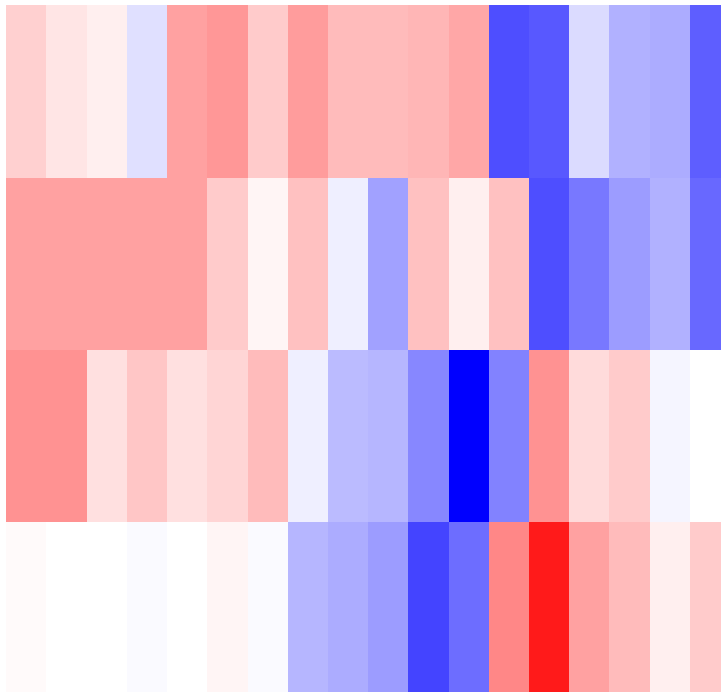

Solyc05g054

Solyc01g017

Solyc01g097

Solyc01g096

Pim2    ON1    Pim1    ON3    BCm1    ON2    Pim3    Pi2    Pi3    BCm3    Pi1    BCm2    BC3    BC1    ONm2    ONm3    ONm1    BC2

### Color Key

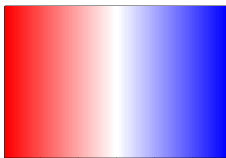

-2 0 1 2  
Value

### Pattern133 2 genes

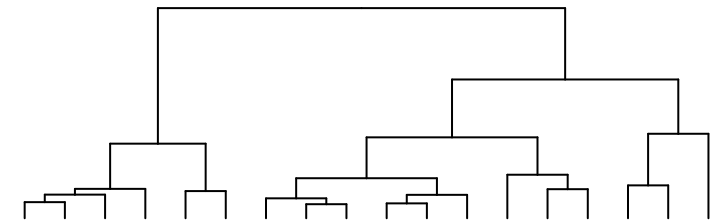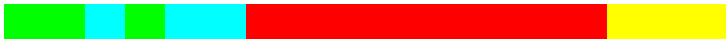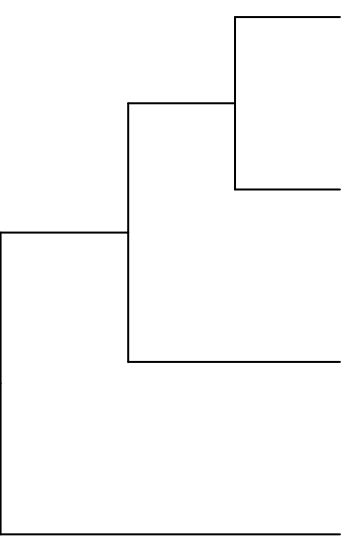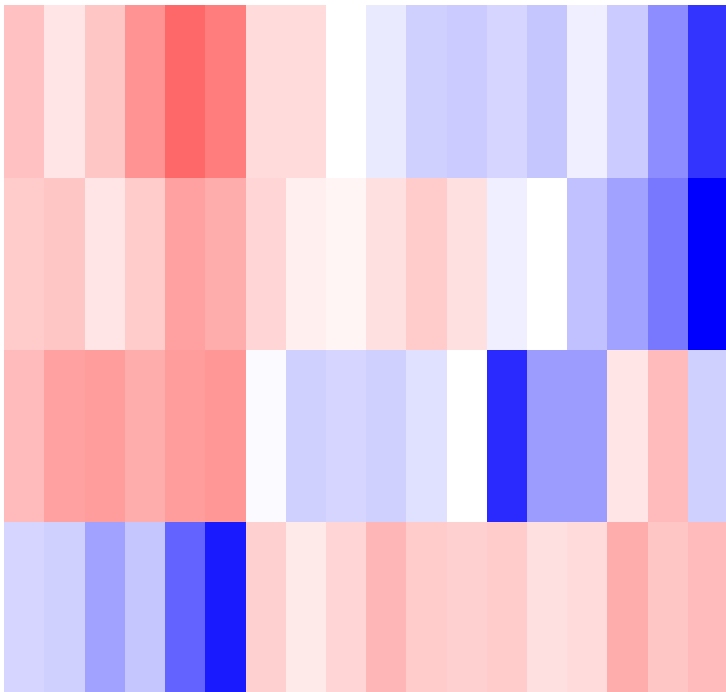

Solyc01g099

Solyc04g007

Solyc03g114

Solyc10g084

P12 P11 P1m1 P13 P1m2 P1m3 ON2 ONm2 ONm1 ON1 BC3 BC2 BC1 ON3 ONm3 BCm3 BCm2 BCm1



### Color Key

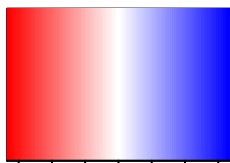

-3    -1    1    3  
Value

### Pattern71 2 genes

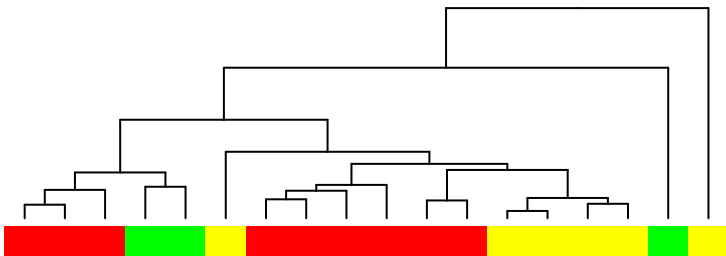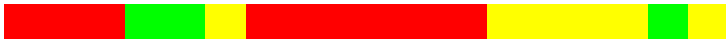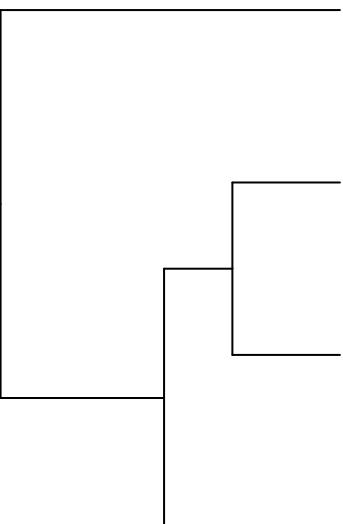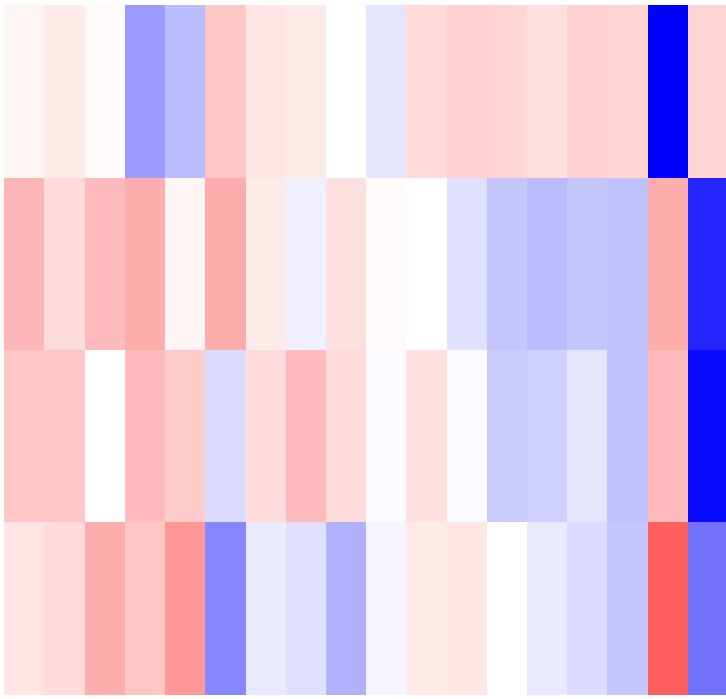

Solyc04g009

Solyc01g009

Solyc11g008

Solyc03g007

BC2    ON2    ON3    ONm1    ONm3    BCm1    Pim2    ON1    BC3    Pim1    Pim3    BC1    Pi3    BCm2    BCm3    Pi2    ONm2    Pi1

### Color Key

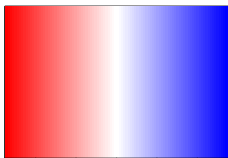

-2 0 1 2  
Value

### Pattern128 2 genes

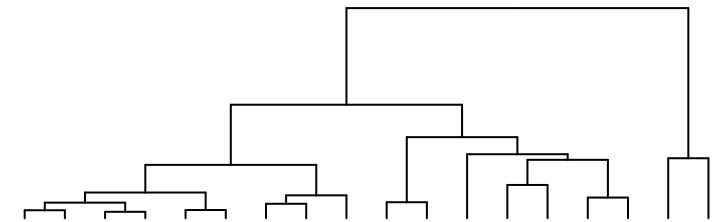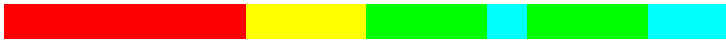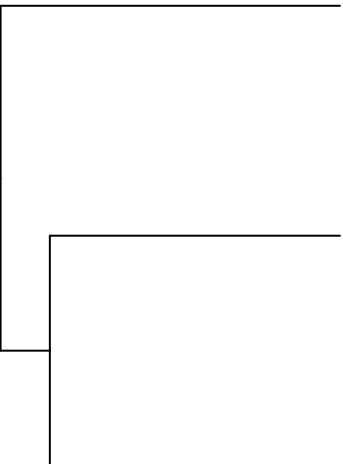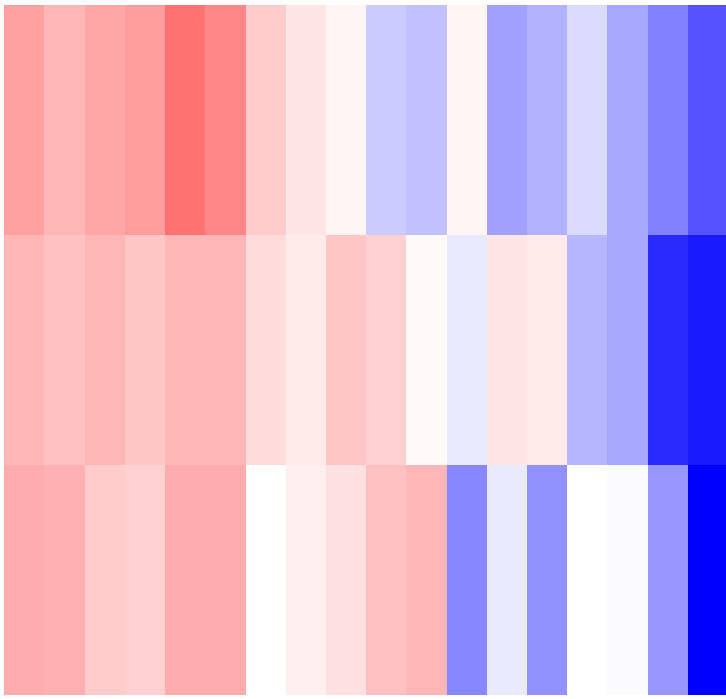

Solyc12g0

Solyc01g0

Solyc12g0

BC1 BCm2 BCm1 BCm3 BC3 BC2 ON1 ON2 ON3 ONm3 Pi1 Pi2 Pim1 ONm2 ONm1 Pi3 Pim2 Pim3

### Color Key

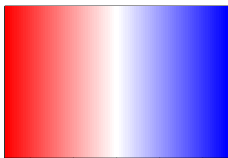

-2 0 1 2  
Value

### Pattern137 2 genes

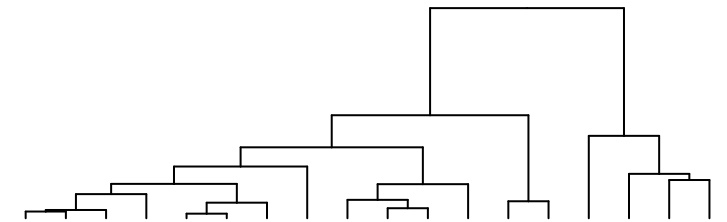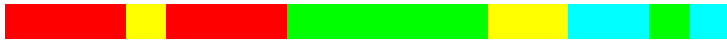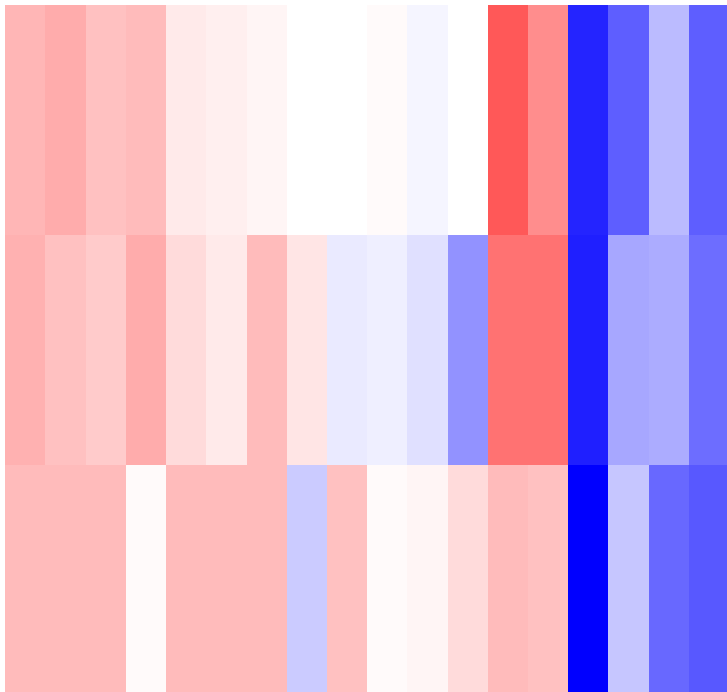

Solyc11g0

Solyc07g0

Solyc03g1

BC1 ON1 ON2 BCm2 ON3 BC2 BC3 ONm2 ONm3 Pi2 ONm1 Pi1 BCm1 BCm3 Pim3 Pim1 Pi3 Pim2

### Color Key

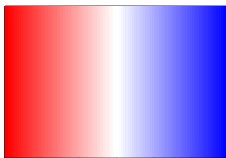

-2 0 1 2  
Value

### Pattern173 2 genes

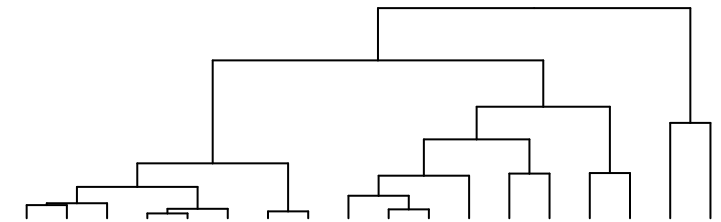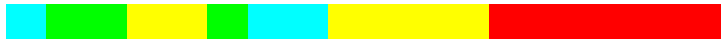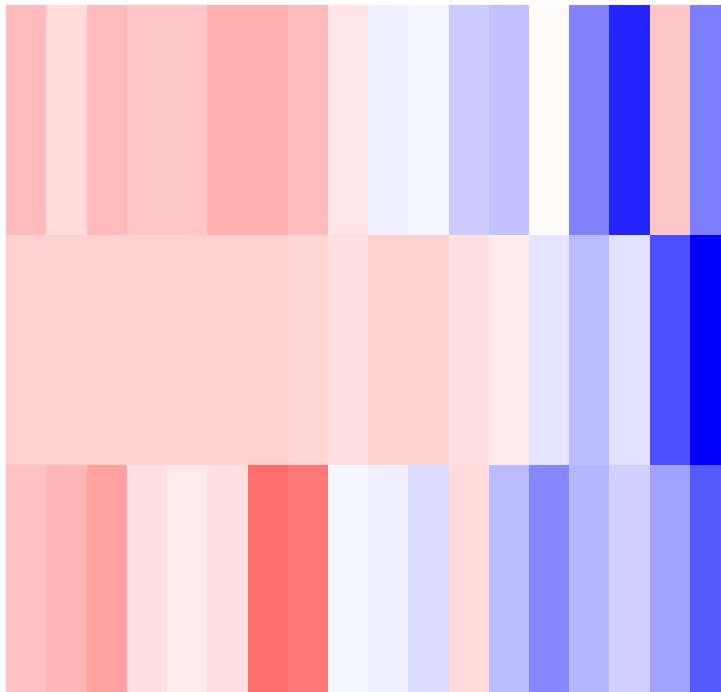

Solyc02g00

Solyc11g00

Solyc08g00

ONm1 ON3 ON1 Pim3 BCm3 ON2 ONm2 ONm3 BCm2 Pim1 BCm1 Pim2 P13 BC1 P12 P11 BC3 BC2

### Color Key

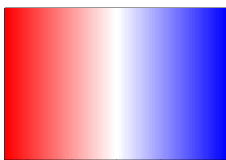

-2      0      1      2  
Value

### Pattern181 2 genes

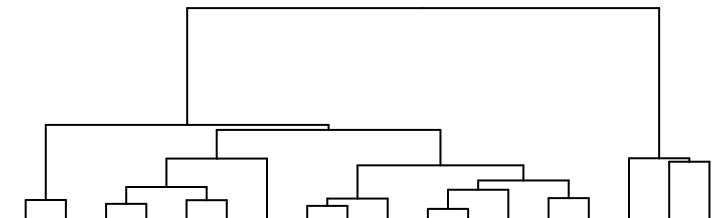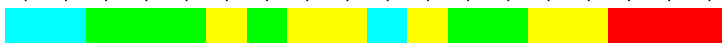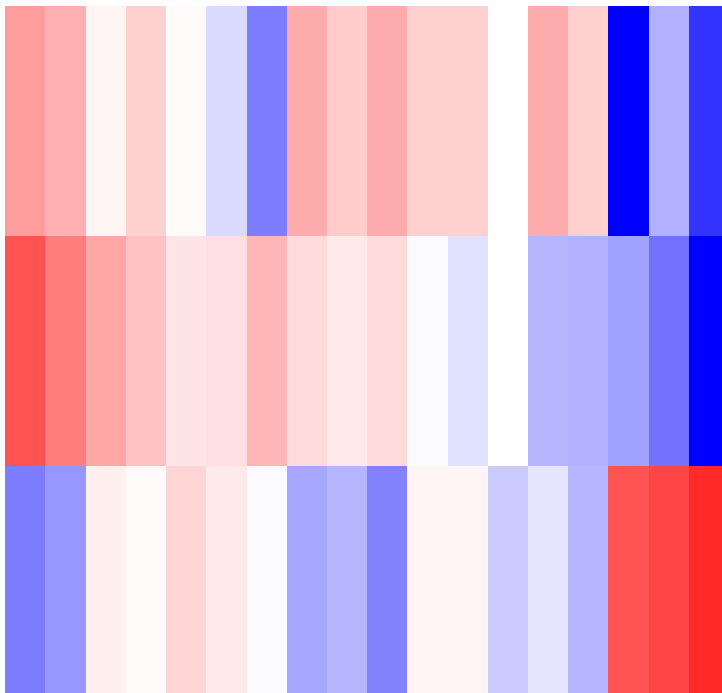

Solyc06g0

Solyc11g0

Solyc04g0

ONm2

ONm3

Pi2

ON2

ON3

BCm1

Pi1

BCm3

Pim3

ONm1

Pim1

Pi3

ON1

BCm2

Pim2

BC3

BC2

BC1

### Color Key

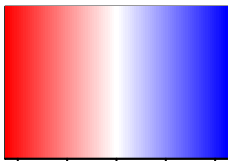

-2 -1 0 1 2  
Value

### Pattern185 2 genes

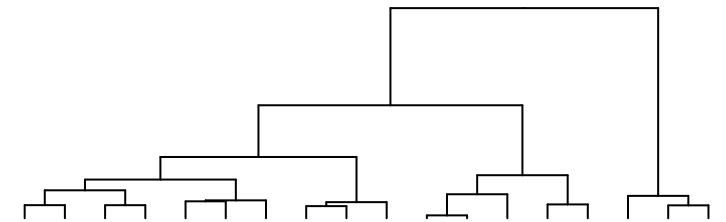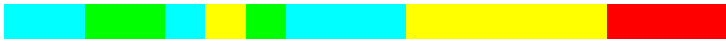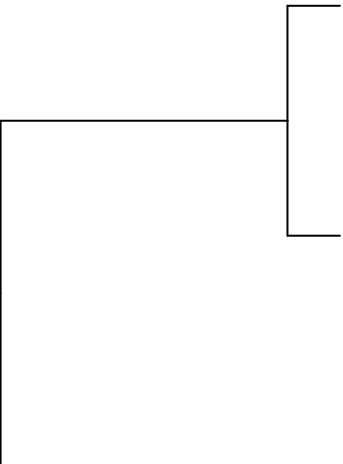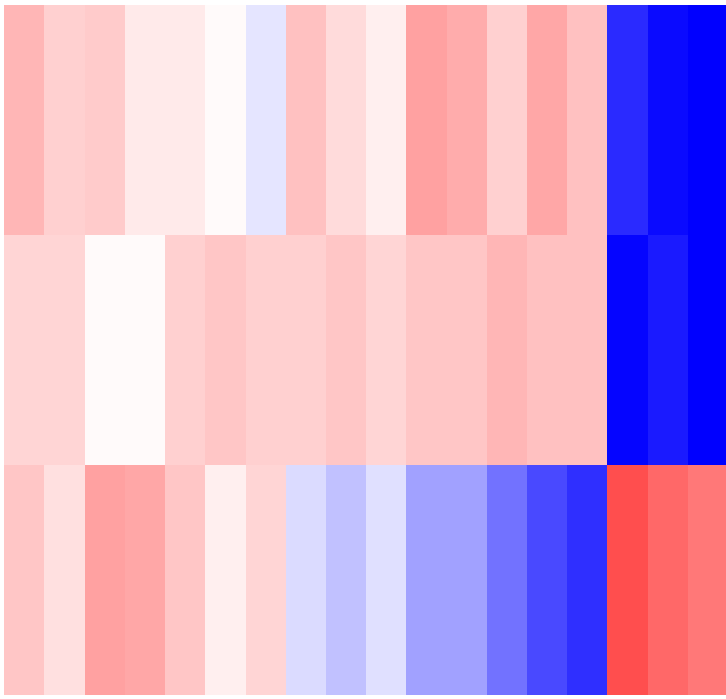

Pi1  
ONm3  
ON1  
ON2  
Pi2  
BCm1  
ON3  
ONm2  
Pi3  
ONm1  
BCm3  
BCm2  
Pim3  
Pim1  
Pim2  
BC1  
BC3  
BC2

Solyc08g0

Solyc09g0

Solyc11g0

### Color Key

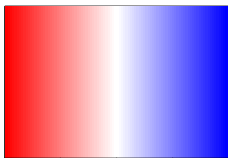

-2 0 2  
Value

### Pattern186 2 genes

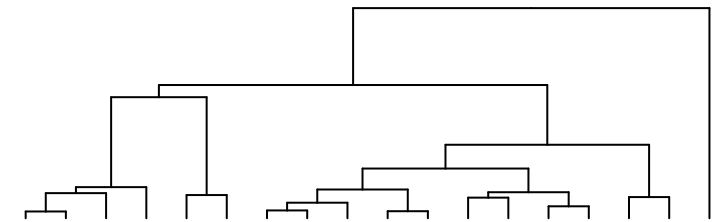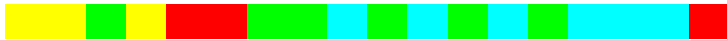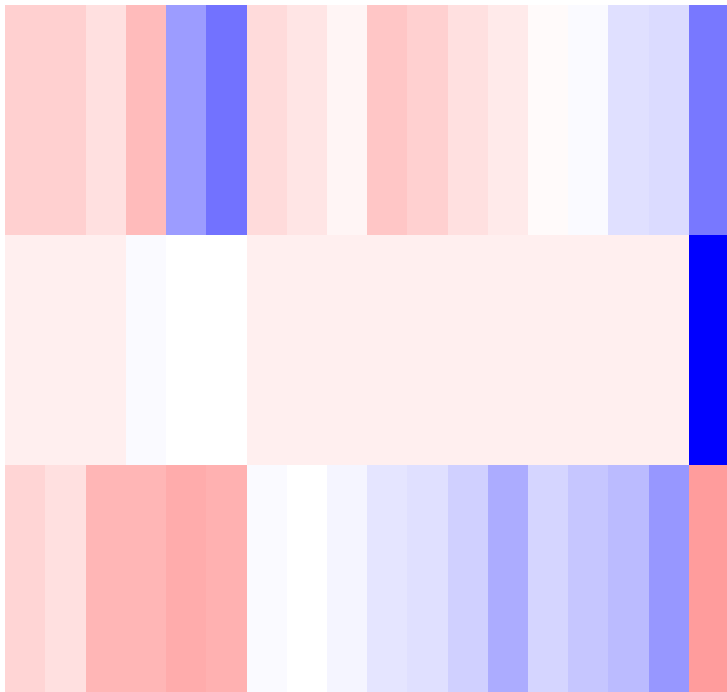

Solyc12g0

Solyc02g0

Solyc06g0

BCm2 BCm3 ON3 BCm1 BC2 BC3 ON1 Pim3 ONm3 Pim1 Pim3 ON2 ONm1 Pim2 Pim1 ONm2 Pim2 BC1

### Color Key

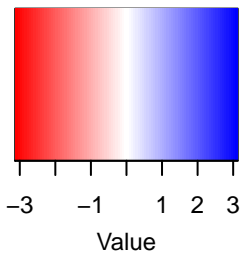

### Pattern199 2 genes

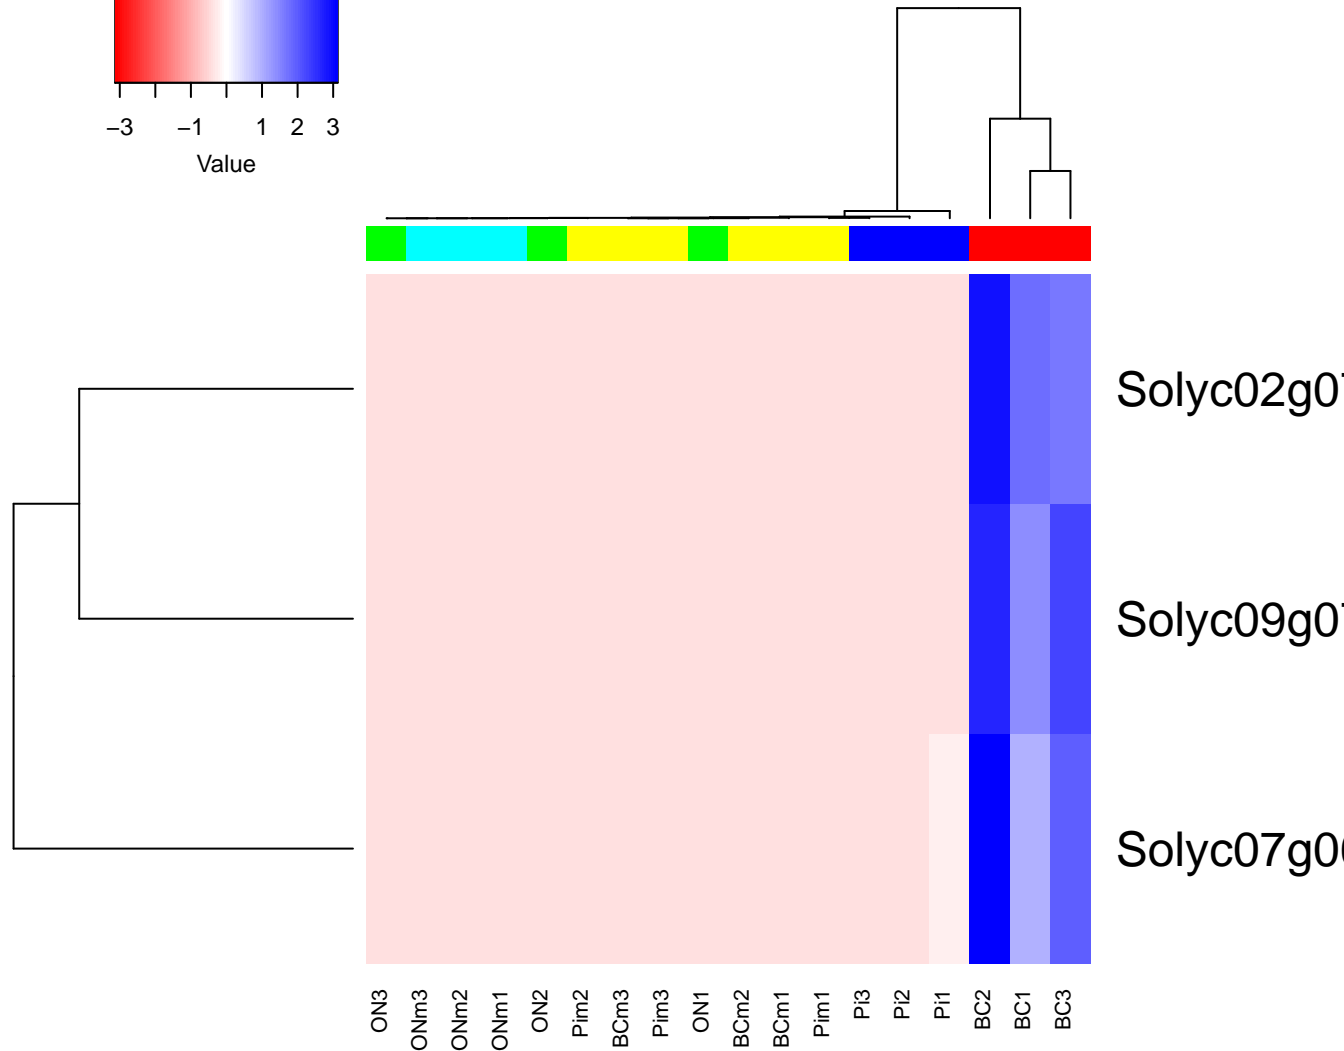



### Color Key

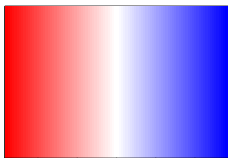

-2 0 1 2  
Value

### Pattern203 2 genes

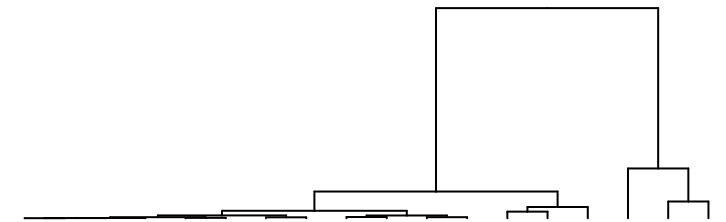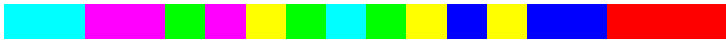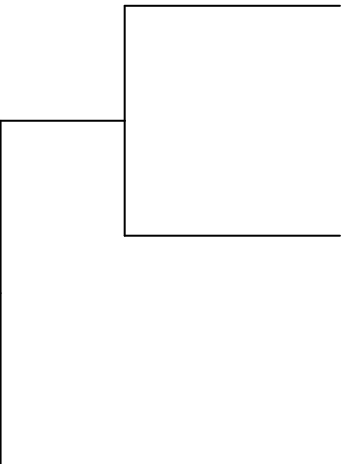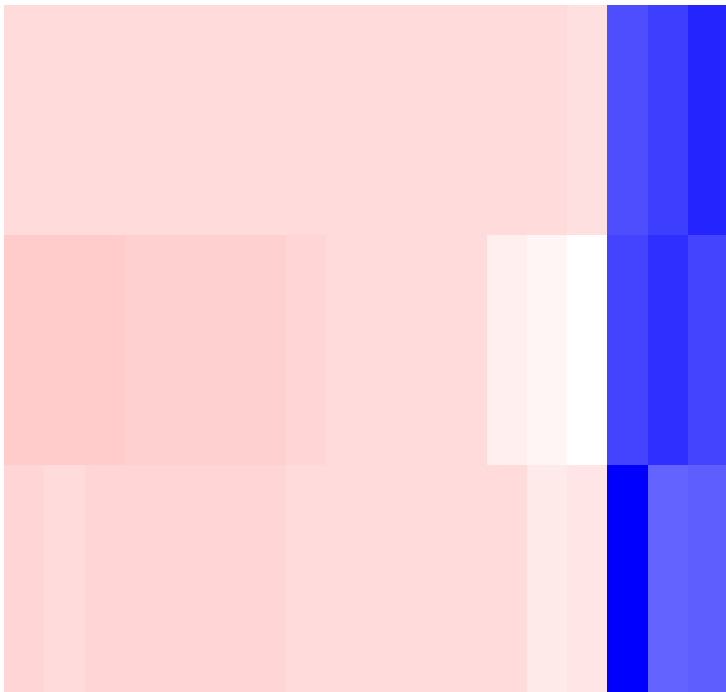

Slyc07g0

Slyc03g1

Slyc03g1

ONm1 ONm2 Pim3 Pim1 ON1 Pim2 BCm3 ON3 ONm3 ON2 BCm2 Pi3 BCm1 Pi1 Pi2 BC1 BC3 BC2

### Color Key

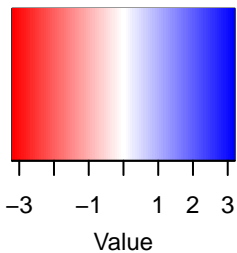

### Pattern55 2 genes

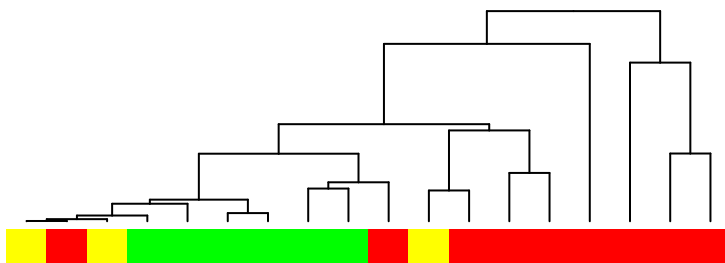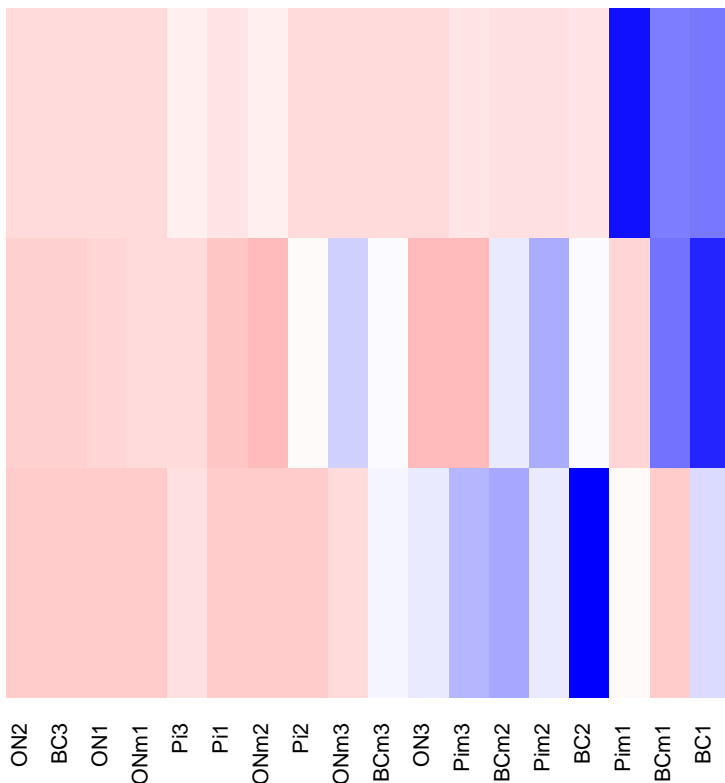

Solyc06g00

Solyc05g00

Solyc08g00

### Color Key

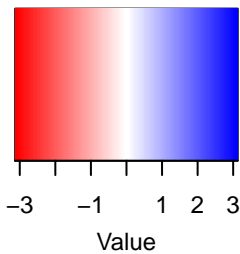

### Pattern69 2 genes

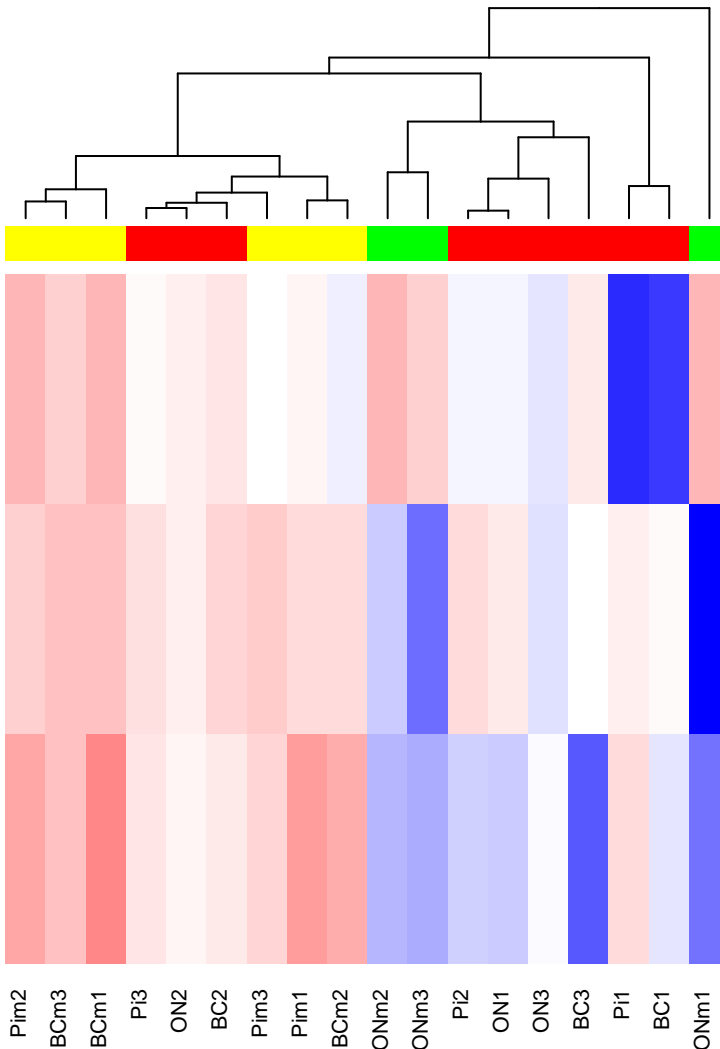

Solyc09g00

Solyc07g00

Solyc03g00

Pim2

BCm3

BCm1

Pl3

ON2

BC2

Pim3

Pim1

BCm2

ONm2

ONm3

Pl2

ON1

ON3

BC3

Pl1

BC1

ONm1

### Color Key

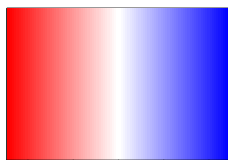

-2      0      1      2  
Value

### Pattern75 2 genes

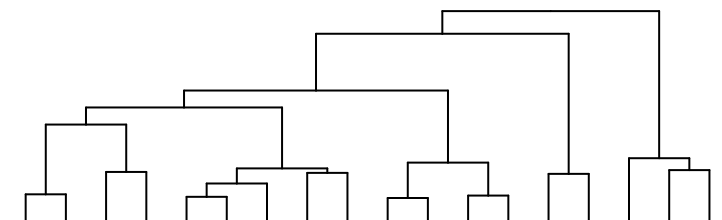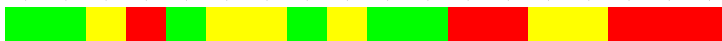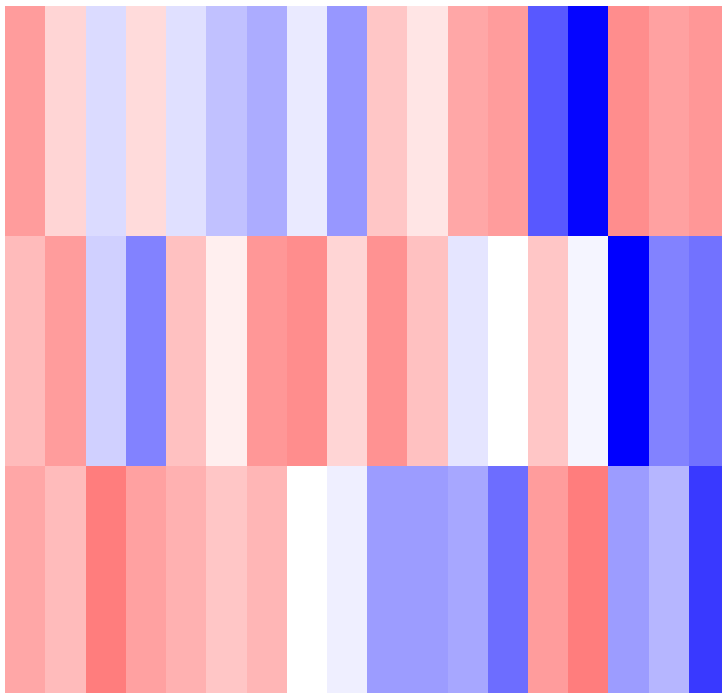

Solyc06g00

Solyc04g00

Solyc11g00

Pi2  
ONm1  
Pim2  
BC3  
Pi3  
BCm3  
Pim3  
ONm2  
Pim1  
Pi1  
ONm3  
ON3  
ON1  
BCm2  
BCm1  
BC1  
ON2  
BC2

### Color Key

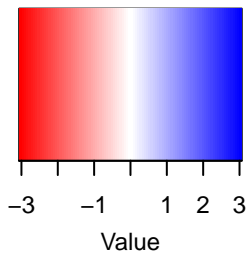

### Pattern98 2 genes

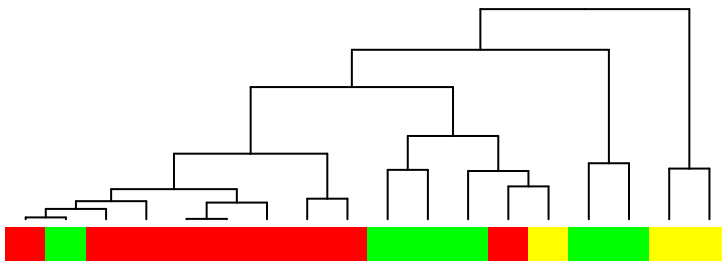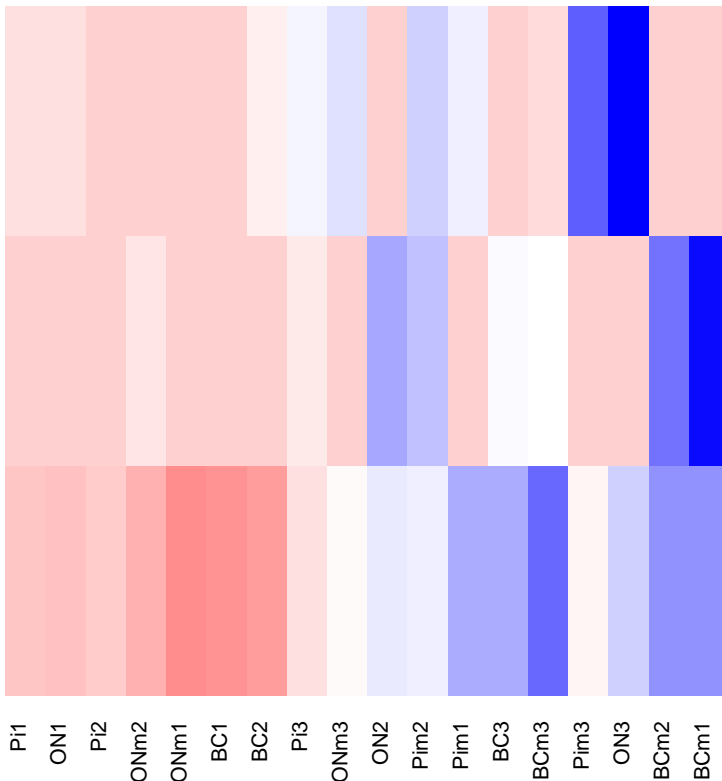

Solyc04g0

Solyc08g0

Solyc12g0

### Color Key

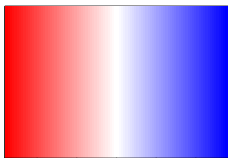

-2 0 1 2  
Value

### Pattern99 2 genes

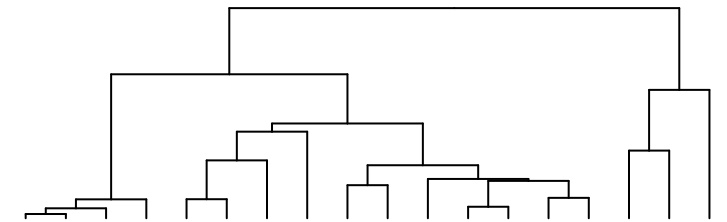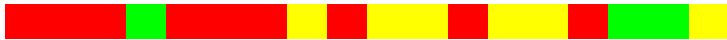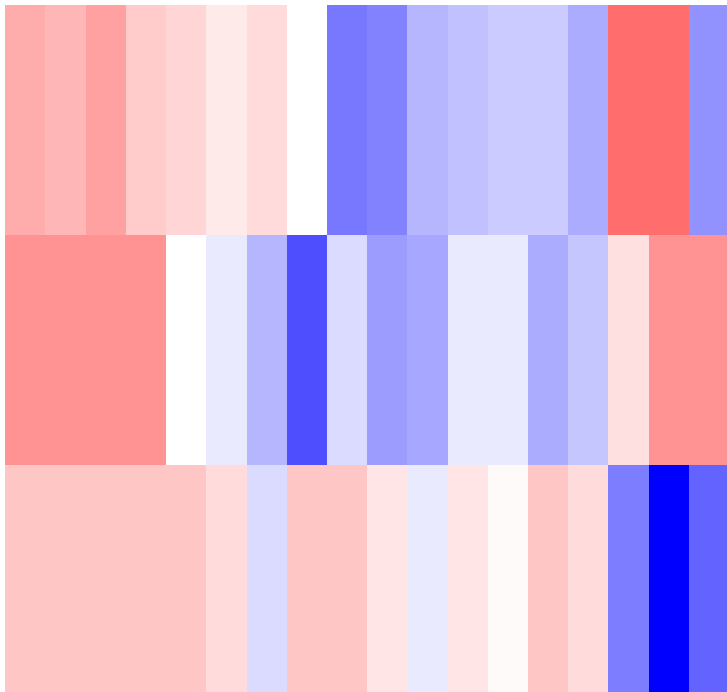

Solyc01g100000

NCRNA\_3.0

Solyc03g000000

BC2 Pim2 ONm2 ON1 Pim1 ONm1 BC3 Pi2 BC1 Pi3 BCm2 ONm3 BCm3 BCm1 Pim3 ON2 ON3 Pi1

### Color Key

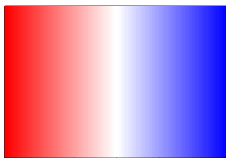

-2      0      1      2  
Value

### Pattern123 2 genes

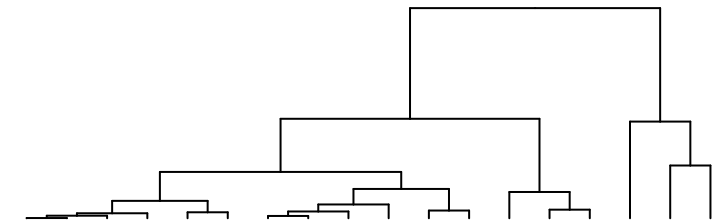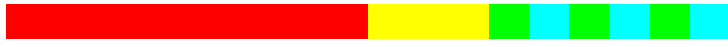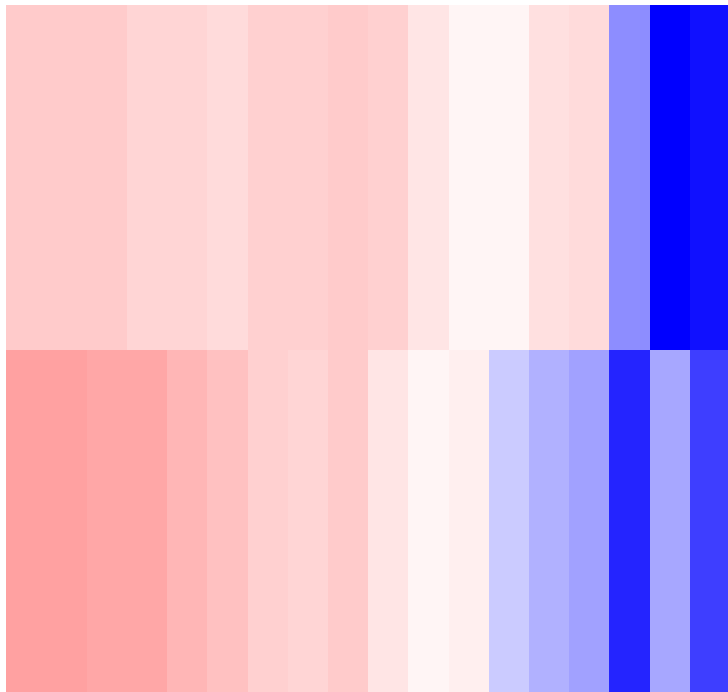

Solyc0

Solyc0

BC3 BC1 BCm1 BCm3 ON2 BCm2 ON3 ON1 BC2 ONm3 ONm2 ONm1 PI2 Pim1 Pim2 Pim3

### Color Key

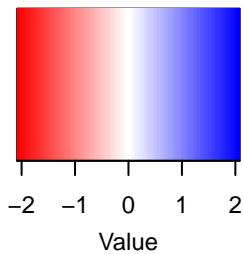

### Pattern126 2 genes

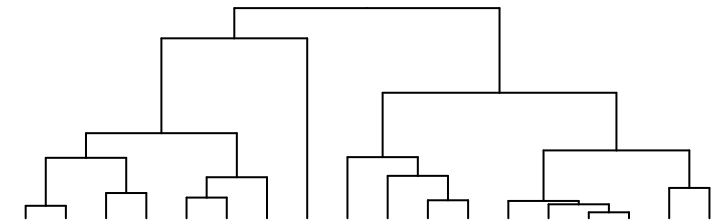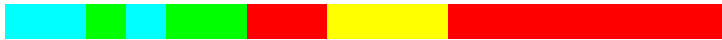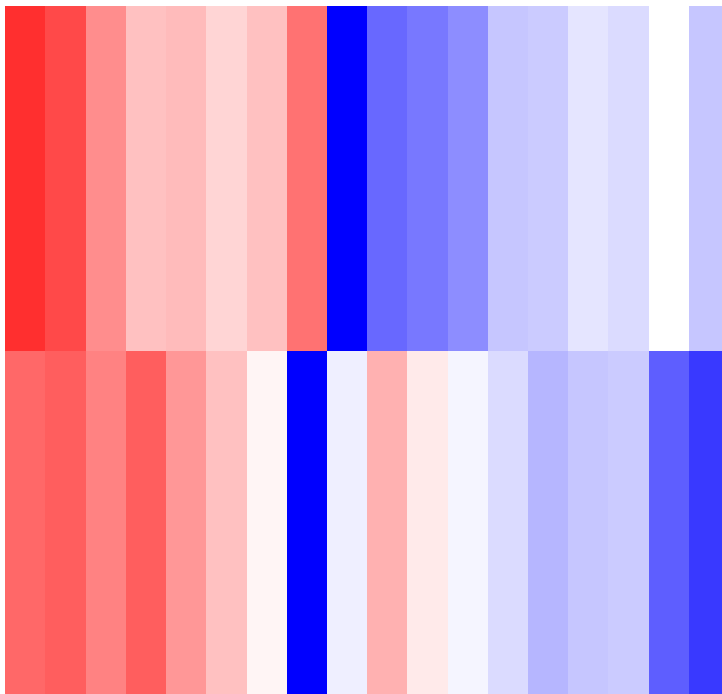

Solyc10

Solyc0

Pim3 Pim2 ONm2 Pim1 ONm1 ONm3 Pl3 BC1 ON3 ON2 ON1 BCm3 Pl2 BC2 Pl1 BCm2 BCm1 BC3



### Color Key

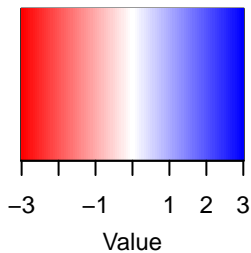

### Pattern132 2 genes

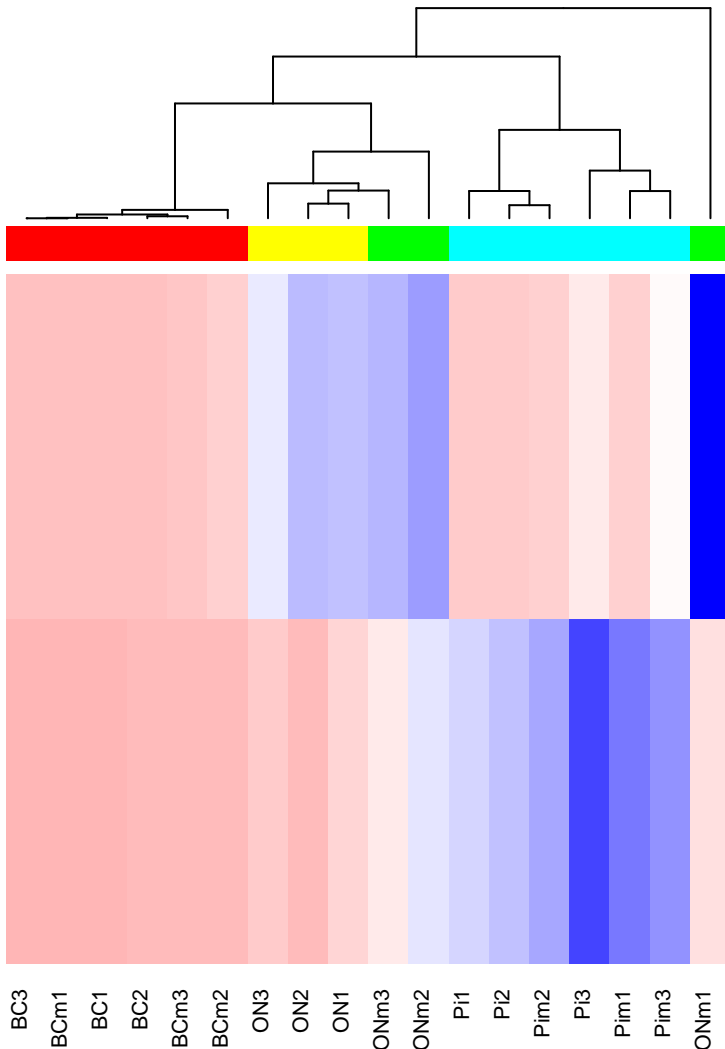

Solyc0

Solyc0

### Color Key

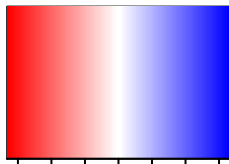

-3 -1 1 2 3  
Value

### Pattern134 2 genes

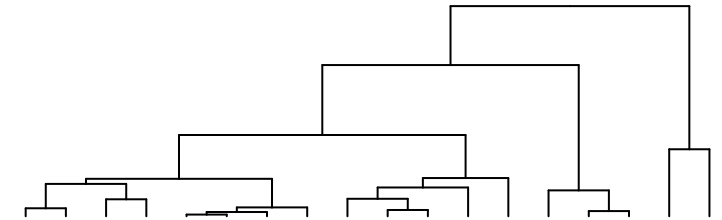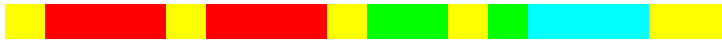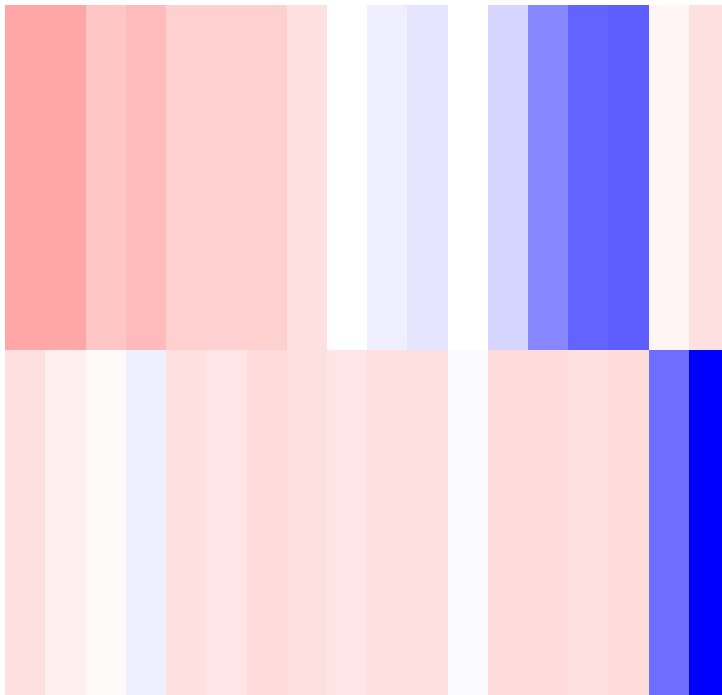

Solyc0

Solyc0

BCm3 ON3 ON1 BC1 ONm3 ON2 BC3 BC2 BCm2 Pi2 Pi1 ONm2 Pi3 Pim2 Pim1 Pim3 ONm1 BCm1

### Color Key

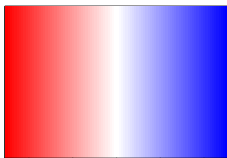

-2      0      1      2

Value

### Pattern142

### 2 genes

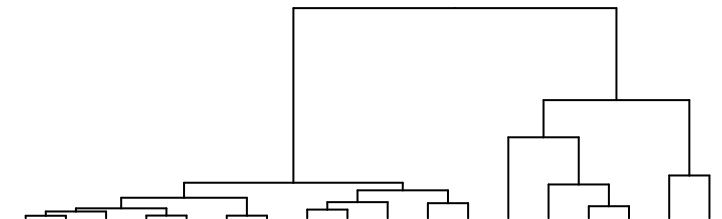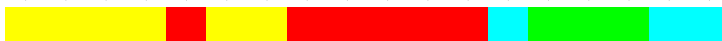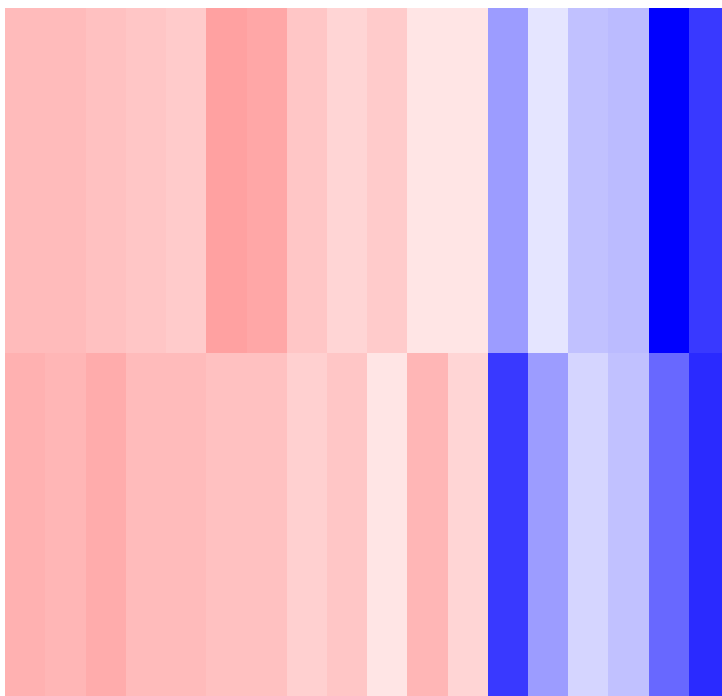

Solyc0

Solyc0

BCm1    ON2    ON3    BCm2    BC2    BCm3    ON1    BC1    BC3    ONm1    ONm3    ONm2    Pim1    Pi1    Pi3    Pi2    Pim3    Pim2

### Color Key

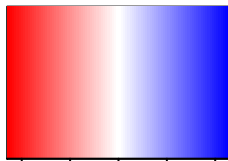

-2 -1 0 1 2  
Value

### Pattern144 2 genes

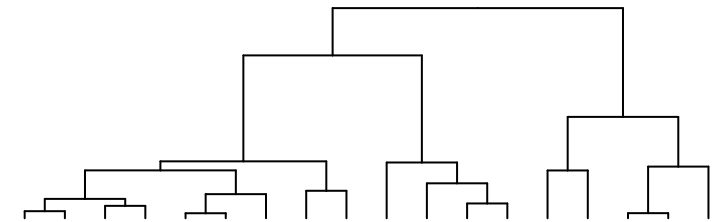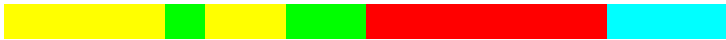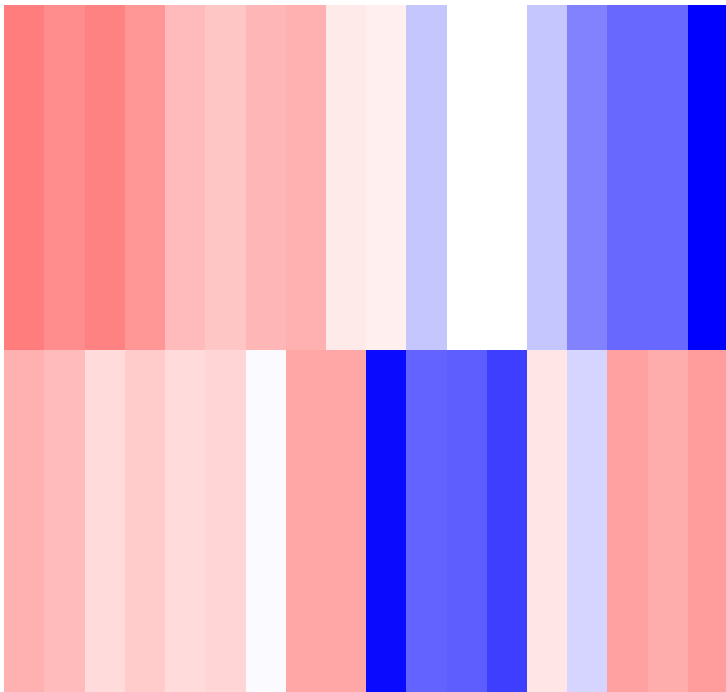

ON1 BCm1 BCm3 ON2 ONm3 ON3 BCm2 ONm1 ONm2 BC3 BC2 Pi2 BC1 Pi3 Pi1 Pim2 Pim1 Pim3

Solyc0

Solyc0

### Color Key

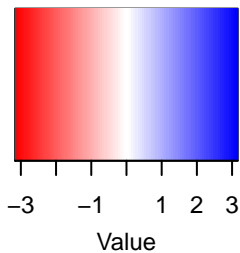

### Pattern168 2 genes

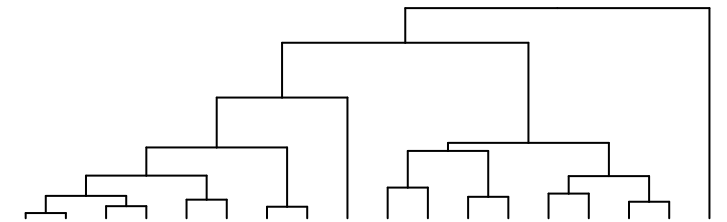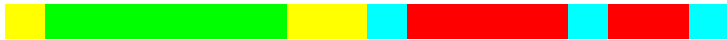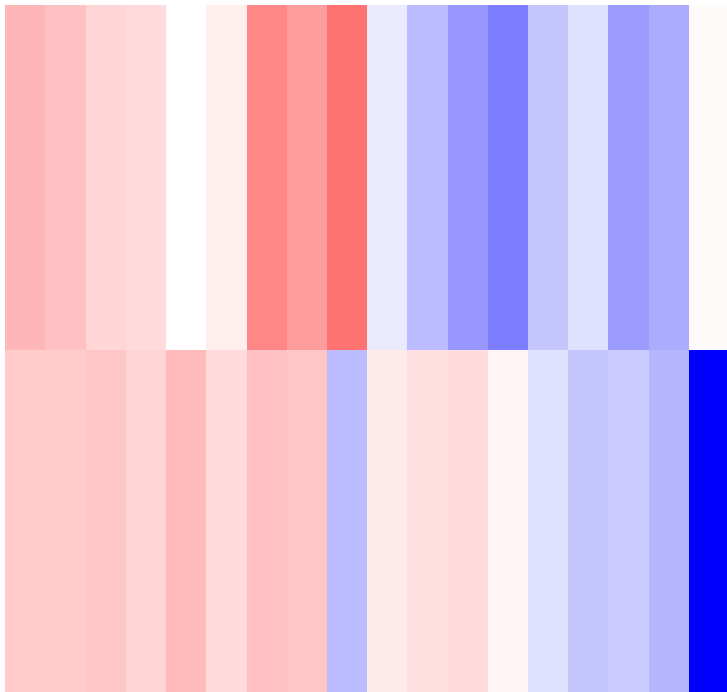

Solyc1

Solyc0

BCm3 ONm3 ONm1 ON2 ON1 ONm2 ON3 BCm2 BCm1 Pim2 Pim1 BC3 Pim3 BC2 Pim3 BC1 Pim2 Pim1

### Color Key

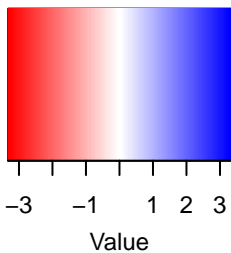

### Pattern172 2 genes

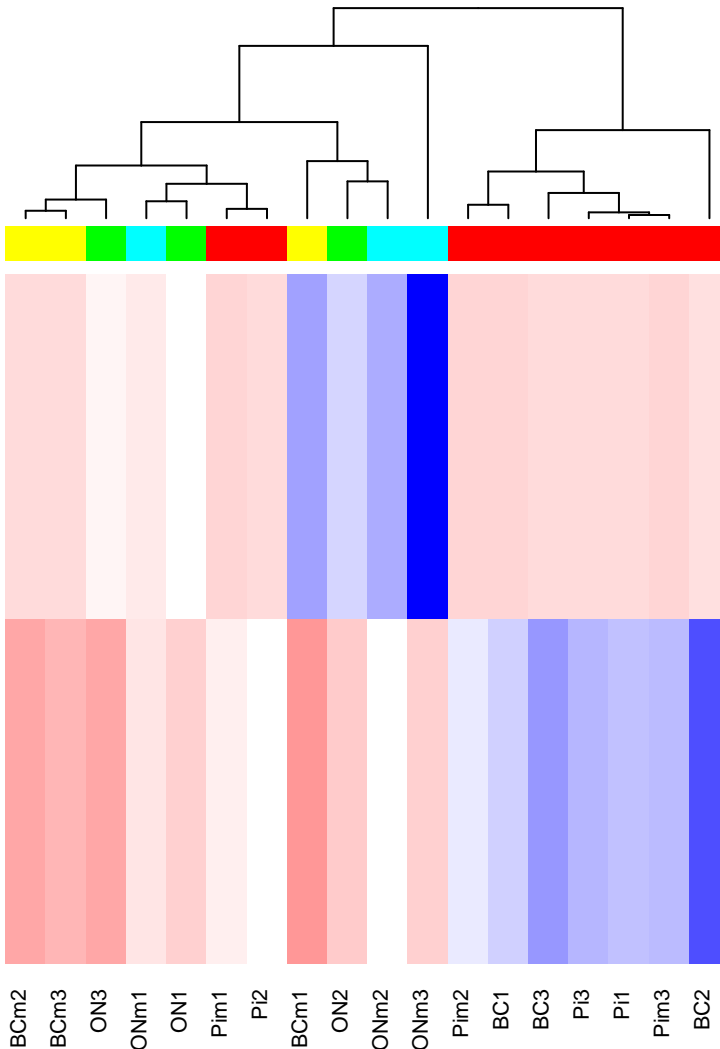

Solyc0

Solyc0

### Color Key

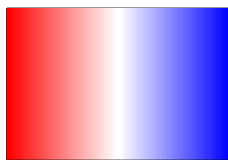

-2 0 1 2  
Value

### Pattern74 2 genes

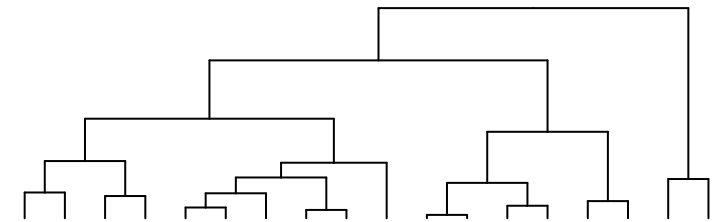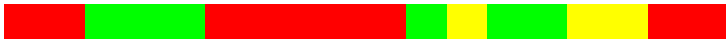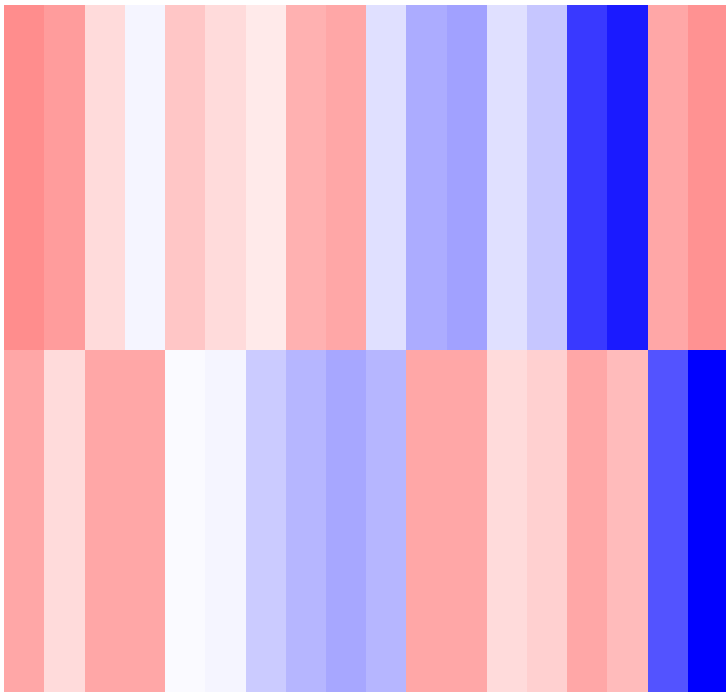

Solyc10

NCRNA

BC2 Pim3 Pi3 ONm3 ONm1 ON2 Pim2 ON1 ON3 Pim1 ONm2 BCm3 Pi2 Pi1 BCm2 BCm1 BC1 BC3

### Color Key

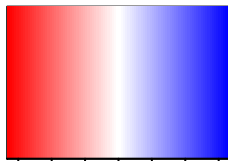

-3 -1 1 2 3  
Value

### Pattern79 2 genes

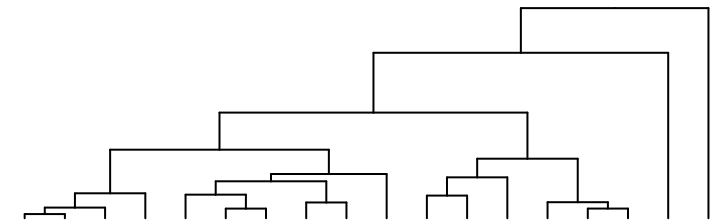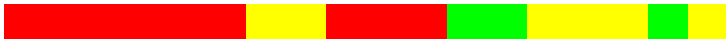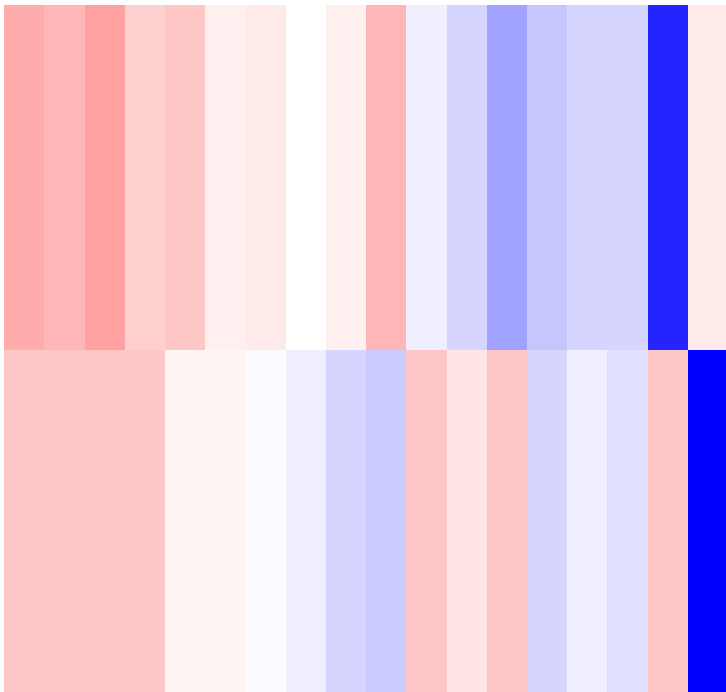

Solyc0

Slyc0

BC1  
ONm2  
Pim3  
BC2  
ONm1  
ONm3  
ON3  
ON1  
BC3  
Pim2  
Pim1  
Pi3  
Pi2  
BCm3  
BCm2  
ON2  
Pi1  
BCm1
